# Supplementary material
Source: PubMed Central journal article supplement (PMC5267969)

# Versatile Homoallylic Boronates by Chemo-, S<sub>N</sub>2'-, Diastereo- and Enantioselective Catalytic Sequence of Cu–H Addition to Vinyl–B(pin)/Allylic Substitution

Jaehee Lee, Sebastian Torker and Amir H. Hoveyda\*

*Department of Chemistry, Merkert Chemistry Center, Boston College, Chestnut Hill, Massachusetts 02467*

e-mail: amir.hoveyda@bc.edu

## SUPPORTING INFORMATION

### *Table of Contents*

|                                                                                                                                      |         |
|--------------------------------------------------------------------------------------------------------------------------------------|---------|
| General.....                                                                                                                         | S4      |
| Reagents.....                                                                                                                        | S4–S5   |
| Preparation of Allylic Phosphates .....                                                                                              | S5–S6   |
| Analytical Data for Unreported Allylic Phosphates .....                                                                              | S6      |
| Examining the Effect of Base.....                                                                                                    | S7      |
| Representative Procedure.....                                                                                                        | S7      |
| Analytical Data for the Oxidation Products of the Multicomponent Reaction.....                                                       | S7–S25  |
| Gram Scale Reaction.....                                                                                                             | S25–S26 |
| C–B(pin) to C–furyl Conversion.....                                                                                                  | S26–S27 |
| Assignment of Absolute Configuration of the Major Isomer from <b>imid-2</b> .....                                                    | S27     |
| Density Functional Theory (DFT)/ONIOM Calculations.....                                                                              | S28–S29 |
| Nomenclature.....                                                                                                                    | S29–S31 |
| Stereochemical model with Cu–NHC complex derived from <b>imid-3</b> (cf. Figure S1-1)<br>.....                                       | S31–S32 |
| Stereochemical model with Cu–NHC complex derived from <b>imid-2</b> (cf. Figure S2-1)<br>.....                                       | S32–S33 |
| The effect of a coordinating reaction medium (thf) on the stability of intramolecular<br>chelate interactions (cf. Figure S3-1)..... | S33–S34 |
| Figures of Free Energy Surfaces.....                                                                                                 | S35     |
| Free Energy Surface for Cu-H Addition/Allylic Substitution with ligand derived                                                       |         |

|                                                                                                                                       |         |
|---------------------------------------------------------------------------------------------------------------------------------------|---------|
| from <b>imid-3</b> .....                                                                                                              | S35–S36 |
| Free Energy Surface for Cu-H Addition/Allylic Substitution with ligand derived from <b>imid-2</b> .....                               | S37–S38 |
| Detailed Investigation of the O <sup>Bpin</sup> →Metal Coordination.....                                                              | S39–S40 |
| Several Pathways and Conformers for Cu-H Addition (model without explicit thf molecules) with ligand derived from <b>imid-3</b> ..... | S41–S42 |
| Several Pathways and Conformers for Cu-H Addition (model with 2 explicit thf molecules) with ligand derived from <b>imid-3</b> .....  | S43–S44 |
| Several Pathways and Conformers for Cu-H Addition (model with 3 explicit thf molecules) with ligand derived from <b>imid-3</b> .....  | S45–S46 |
| Several Pathways and Conformers for Allylic Substitution with ligand derived from <b>imid-3</b> .....                                 | S47–S48 |
| Several Pathways and Conformers for Cu-H Addition (model without explicit thf molecules) with ligand derived from <b>imid-2</b> ..... | S49–S50 |
| Several Pathways and Conformers for Cu-H Allylic Substitution with ligand derived from <b>imid-2</b> .....                            | S51–S52 |
| Energies and Gibbs Free Energies.....                                                                                                 | S53     |
| Optimization in Figure S4-1 with M06L/Def2SVP:UFF in THF.....                                                                         | S53     |
| Optimization in Figure S5-1 with M06L/Def2SVP:UFF in THF.....                                                                         | S54     |
| Optimization in Figure S6-1 with M06L/Def2SVP:UFF in THF.....                                                                         | S55     |
| Optimization in Figure S7-1 with M06L/Def2SVP:UFF in THF.....                                                                         | S56     |
| Optimization in Figure S8-1 with M06L/Def2SVP:UFF in THF.....                                                                         | S57     |
| Optimization in Figure S9-1 with M06L/Def2SVP:UFF in THF.....                                                                         | S58     |
| Single point energies in Figure S4-1 with M06, ωB97XD and MN12SX.....                                                                 | S59     |
| Single point energies in Figure S4-1 with MN12L and M06L.....                                                                         | S60     |
| Single point energies in Figure S4-1 with BP86-D3BJ and PBE0-D3BJ.....                                                                | S61     |
| Single point energies in Figure S5-1 with M06, ωB97XD and MN12SX.....                                                                 | S62     |
| Single point energies in Figure S5-1 with MN12L and M06L.....                                                                         | S63     |
| Single point energies in Figure S5-1 with BP86-D3BJ and PBE0-D3BJ.....                                                                | S64     |
| Single point energies in Figure S6-1 with M06, ωB97XD and MN12SX.....                                                                 | S65     |
| Single point energies in Figure S6-1 with MN12L and M06L.....                                                                         | S66     |
| Single point energies in Figure S6-1 with BP86-D3BJ and PBE0-D3BJ.....                                                                | S67     |
| Single point energies in Figure S7-1 with M06, ωB97XD and MN12SX.....                                                                 | S68     |
| Single point energies in Figure S7-1 with MN12L and M06L.....                                                                         | S69     |
| Single point energies in Figure S7-1 with BP86-D3BJ and PBE0-D3BJ.....                                                                | S70     |

|                                                                               |           |
|-------------------------------------------------------------------------------|-----------|
| Single point energies in Figure S8-1 with M06, $\omega$ B97XD and MN12SX..... | S71       |
| Single point energies in Figure S8-1 with MN12L and M06L.....                 | S72       |
| Single point energies in Figure S8-1 with BP86-D3BJ and PBE0-D3BJ.....        | S73       |
| Single point energies in Figure S9-1 with M06, $\omega$ B97XD and MN12SX..... | S74       |
| Single point energies in Figure S9-1 with MN12L and M06L.....                 | S75       |
| Single point energies in Figure S9-1 with BP86-D3BJ and PBE0-D3BJ.....        | S76       |
| Coordinates after optimization with M06L/Def2SVP:UFF.....                     | S77–S330  |
| NMR Spectra.....                                                              | S331–S374 |

**General.** Infrared (IR) spectra were recorded on a Bruker FT-IR Alpha (ATR mode) spectrophotometer,  $\nu_{\max}$  in  $\text{cm}^{-1}$ . Bands are characterized as broad (br), strong (s), medium (m), and weak (w).  $^1\text{H}$  NMR spectra were recorded on Varian Unity INOVA 400 (400 MHz), 500 (500 MHz), or 600 (600 MHz) spectrometers. Chemical shifts are reported in ppm from tetramethylsilane with the solvent resonance as the internal standard ( $\text{CDCl}_3$ :  $\delta$  7.26 ppm). Data are reported as follows: chemical shift, integration, multiplicity (s = singlet, d = doublet, t = triplet, q = quartet, pent = pentet, m = multiplet, br = broad, app = apparent), and coupling constants (Hz).  $^{13}\text{C}$  NMR spectra were recorded on Varian Unity INOVA 400 (100 MHz), 500 (125 MHz), or 600 (150 MHz) spectrometers with complete proton decoupling. Chemical shifts are reported in ppm from tetramethylsilane with the solvent resonance as the internal standard ( $\text{CDCl}_3$ :  $\delta$  77.16 ppm). High-resolution mass spectrometry was performed on a JEOL AccuTOF DART (positive mode) at the Mass Spectrometry Facility, Boston College. Enantiomeric ratios were determined by HPLC analysis (high-performance liquid chromatography) with a Shimadzu chromatograph [Chiral Technologies Chiralcel AZ-H (4.6 x 250 mm), Chiral Technologies Chiralcel OC-H (4.6 x 250 mm), Chiral Technologies Chiralcel OD-H (4.6 x 250 mm), Chiral Technologies Chiralcel OJ-H (4.6 x 250 mm), Chiral Technologies Chiralcel OZ-H (4.6 x 250 mm), or Chiral Technologies Chiralpak AD-H (4.6 x 250 mm)] in comparison with authentic racemic materials. Specific rotations were measured on a Rudolph Research Analytical Autopol IV Polarimeter. Melting points were measured on a Thomas Hoover capillary melting point apparatus and are uncorrected.

Unless otherwise noted, reactions were carried out with distilled and degassed solvents under an atmosphere of dry  $\text{N}_2$  in oven- (135 °C) or flame-dried glassware with standard dry box or vacuum-line techniques. Dichloromethane was purified under a positive pressure of dry argon by a modified Innovative Technologies purification system through a copper oxide and alumina column. Tetrahydrofuran (Aldrich Chemical Co.) was purified by distillation from sodium benzophenone ketyl immediately prior to use. All work-up and purification procedures were carried out with reagent grade solvents (purchased from Fisher Scientific) under air.

#### ■ Reagents:

***N*-Bromosuccinimide (NBS):** purchased from Alfa Aesar and recrystallized from  $\text{H}_2\text{O}$ .

**Buffer solution pH = 7.0 (20 °C):** purchased from Aldrich and used as received.

***n*-Butyllithium (1.6 M in hexanes):** purchased from Aldrich and used as received.

**Chiral imidazolinium salt (imid-1):** prepared according to previously reported procedure.<sup>[1]</sup>

**Chiral imidazolinium salt (imid-2):** prepared according to previously reported procedure.<sup>[2]</sup>

**Chiral imidazolinium salt (imid-3):** prepared according to previously reported procedure.<sup>[3]</sup>

---

[1] X. Li, F. Meng, S. Torker, Y. Shi, A. H. Hoveyda, *Angew. Chem. Int. Ed.* **2016**, *55*, 9997–10002.

[2] M. K. Brown, T. L. May, C. A. Baxter, H. Hoveyda, *Angew. Chem. Int. Ed.* **2007**, *119*, 1115–1118.

[3] B. Jung, A. H. Hoveyda, *J. Am. Chem. Soc.* **2012**, *134*, 1490–1493.

**Chiral phosphine ligand (phos-1):** purchased from Strem and used as received.

**Chiral phosphine ligand (phos-2):** purchased from Strem and used as received.

**Chiral phosphine ligand (phos-3):** purchased from Strem and used as received.

**Chiral phosphine ligand (phos-4):** purchased from Strem and used as received.

**Chiral phosphine ligand (phos-5):** purchased from Strem and used as received.

**Chiral phosphine ligand (phos-6):** purchased from Strem and used as received.

**Copper(I) chloride:** purchased from Strem and used as received.

**Furan:** purchased from Aldrich and purified by washing with aqueous 5% KOH, dried with Na<sub>2</sub>SO<sub>4</sub>, then distilled over KOH under reduced pressure prior to use.

**Lithium *tert*-butoxide:** purchased from Strem and used as received.

**Poly(methylhydrosiloxane) (PMHS):** purchased from Alfa Aesar and used as received.

**Sodium *tert*-butoxide:** purchased from Strem and used as received.

**Sodium perborate tetrahydrate (NaBO<sub>3</sub>•4H<sub>2</sub>O):** purchased from Aldrich and used as received.

**4,4,5,5-Tetramethyl-2-vinyl-1,3,2-dioxaborolane:** purchased from Combi-blocks and distilled over CaH<sub>2</sub> under reduced pressure prior to use.

**Triethylamine (Et<sub>3</sub>N):** purchased from Aldrich and used as received.

■ **Preparation of Allylic Phosphates:** Allylic alcohols were synthesized from the corresponding ester by a two-step Horner-Wadsworth-Emmons olefin synthesis/dibal-H reduction sequence. Subsequently, allylic alcohols were converted to the corresponding allylic phosphates based on established methods.<sup>[4],[5]</sup> The following substrates were prepared according to the above sequence. Characterization data matched those reported previously.

**(*E*)-Diethyl 3-phenylprop-2-enyl phosphate (1a)<sup>[6]</sup>**

**(*E*)-Diethyl (3-(2-fluorophenyl)allyl) phosphate (1b)<sup>[3]</sup>**

**(*E*)-3-(2-Bromophenyl)allyl diethyl phosphate (1c)<sup>[3]</sup>**

**(*E*)-Diethyl (3-(2-methoxyphenyl)allyl) phosphate (1d)<sup>[7]</sup>**

**(*E*)-Diethyl (3-(*o*-tolyl)allyl) phosphate (1e)<sup>[7]</sup>**

**(*E*)-Diethyl (3-(naphthalen-2-yl)allyl) phosphate (1f)<sup>[8]</sup>**

**(*E*)-3-(3-Bromophenyl)allyl diethyl phosphate (1g)<sup>[7]</sup>**

**(*E*)-Diethyl (3-(3-methoxyphenyl)allyl) phosphate (1h)<sup>[9]</sup>**

---

[4] Y. Shi, B. Jung, S. Torker, A. H. Hoveyda, *J. Am. Chem. Soc.* **2015**, *137*, 8948–8964.

[5] Y. Shi, A. H. Hoveyda, *Angew. Chem. Int. Ed.* **2016**, *55*, 3455–3458.

[6] S. Murahashi, Y. Taniguchi, Y. Imada, Y. Tanigawa, *J. Org. Chem.* **1989**, *54*, 3292–3303.

[7] K. Akiyama, F. Gao, A. H. Hoveyda, *Angew. Chem. Int. Ed.* **2010**, *49*, 429–433.

[8] M. A. Kacprzynski, A. H. Hoveyda, *J. Am. Chem. Soc.* **2004**, *126*, 10676–10681.

[9] L. B. Delvos, D. J. Vyas, M. Oestreich, *Angew. Chem. Int. Ed.* **2013**, *52*, 4650–4653.

**(E)-3-(4-Chlorophenyl)allyl diethyl phosphate (1i)**<sup>[7]</sup>

**(E)-3-(4-Bromophenyl)allyl diethyl phosphate (1j)**<sup>[10]</sup>

**(E)-Diethyl (3-(4-(trifluoromethyl)phenyl)allyl) phosphate (1k)**<sup>[3]</sup>

**(E)-Diethyl (3-(4-nitrophenyl)allyl) phosphate (1l)**<sup>[11]</sup>

**(E)-Diethyl (3-(pyridin-3-yl)allyl) phosphate (1-4)**<sup>[4]</sup>

**(E)-Diethyl (5-phenylpent-2-en-1-yl) phosphate (1-8)**<sup>[7]</sup>

**(E)-3-Cyclohexylallyl diethyl phosphate (1-9)**<sup>[7]</sup>

**(E)-But-2-en-1-yl diethyl phosphate (1-10)**<sup>[12]</sup>

**(E)-3-(Benzo[b]thiophen-3-yl)allyl diethyl phosphate (1-5):** IR (neat): 2983 (w), 1655 (w), 1510 (w), 1259 (s), 1164 (w), 1002 (s), 957 (s), 851 (m), 756 (s), 729 (s), 669 (w), 523 (m), 421 (m)  $\text{cm}^{-1}$ ; <sup>1</sup>H NMR (CDCl<sub>3</sub>, 400 MHz):  $\delta$  7.91 (1H, d,  $J = 8.0$  Hz), 7.87 (1H, d,  $J = 8.0$  Hz), 7.48 (1H, s), 7.44–7.38 (2H, m), 6.96 (1H, d,  $J = 15.2$  Hz), 6.44–6.36 (1H, m), 4.77 (1H, dd,  $J = 7.6, 1.6$  Hz), 4.75 (1H, dd,  $J = 8.4, 1.2$  Hz), 4.16 (4H, m), 1.36 (6H, t,  $J = 6.8$  Hz); <sup>13</sup>C NMR (100 MHz, CDCl<sub>3</sub>):  $\delta$  140.5, 137.6, 132.9, 126.2, 125.3 (d,  $J_{\text{CP}} = 6.8$  Hz), 124.7, 124.5, 123.4, 123.0, 122.0, 68.1 (d,  $J_{\text{CP}} = 5.3$  Hz), 64.0 (d,  $J_{\text{CP}} = 5.3$  Hz), 16.3 (d,  $J_{\text{CP}} = 6.8$  Hz); HRMS (DART): Calcd for C<sub>15</sub>H<sub>19</sub>O<sub>4</sub>PS [M]<sup>+</sup>: 326.0742; Found: 326.0747.

**Diethyl ((2E,4E)-5-phenylpenta-2,4-dien-1-yl) phosphate (1-6):** IR (neat): 2983 (w), 1976 (w), 1449 (w), 1260 (m), 1165 (w), 1017 (s), 965 (s), 851 (m), 749 (m), 693 (m), 507 (m)  $\text{cm}^{-1}$ ; <sup>1</sup>H NMR (400 MHz, CDCl<sub>3</sub>):  $\delta$  7.41–7.39 (2H, m), 7.34–7.30 (2H, m), 7.25–7.22 (1H, m), 6.77 (1H, dd,  $J = 15.6, 10.8$  Hz), 6.60 (1H, d,  $J = 15.6$  Hz), 6.48 (1H, dd,  $J = 15.2, 10.4$  Hz), 5.90 (1H, dt,  $J = 15.2, 6.4$  Hz), 4.64 (1H, dd,  $J = 6.4, 1.2$  Hz), 4.62 (1H, dd,  $J = 6.8, 1.2$  Hz), 4.13 (4H, m), 1.35 (6H, td,  $J = 7.2, 0.8$  Hz); <sup>13</sup>C NMR (CDCl<sub>3</sub>, 100 MHz):  $\delta$  137.0, 134.4, 134.3, 128.8, 128.0, 127.6, 127.3 (d,  $J_{\text{CP}} = 6.1$  Hz), 126.7, 67.8 (d,  $J_{\text{CP}} = 5.3$  Hz), 63.9 (d,  $J_{\text{CP}} = 6.1$  Hz), 16.3 (d,  $J_{\text{CP}} = 6.8$  Hz).

**(E)-Diethyl (5-phenylpent-2-en-4-yn-1-yl) phosphate (1-7):** IR (neat): 2983 (w), 1490 (w), 1443 (w), 1262 (s), 1004 (s), 950 (s), 846 (m), 800 (m), 755 (s), 690 (s), 582 (w), 527 (m)  $\text{cm}^{-1}$ ; <sup>1</sup>H NMR (400 MHz, CDCl<sub>3</sub>):  $\delta$  7.44–7.42 (2H, m), 7.32–7.31 (3H, m), 6.26 (1H, dt,  $J = 15.6, 5.6$  Hz), 6.02 (1H, dt,  $J = 15.6, 1.6$  Hz), 4.63 (1H, dd,  $J = 6.0, 1.6$  Hz), 4.61 (1H, dd,  $J = 6.0, 1.6$  Hz), 4.17–4.10 (4H, m), 1.35 (6H, t,  $J = 6.8$ ); <sup>13</sup>C NMR (100 MHz, CDCl<sub>3</sub>):  $\delta$  136.6, 136.56, 131.7, 128.5 (d,  $J_{\text{CP}} = 11.4$  Hz), 123.1, 113.3, 91.3, 86.8, 66.9 (d,  $J_{\text{CP}} = 5.3$  Hz), 64.1 (d,  $J_{\text{CP}} = 6.0$  Hz), 16.3 (d,  $J_{\text{CP}} = 6.1$  Hz); HRMS (DART): Calcd for C<sub>15</sub>H<sub>20</sub>O<sub>4</sub>P [M+H]<sup>+</sup>: 295.1099; Found: 295.1098

[10] Z.-Q. Zhang, B. Zhang, X. Lu, J.-H. Liu, X.-Y. Lu, B. Xiao, Y. Fu, *Org. Lett.* **2016**, *18*, 952–955.

[11] C. A. Luchaco-Cullis, H. Mizutani, K. E. Murphy, A. H. Hoveyda, *Angew. Chem. Int. Ed.* **2001**, *40*, 1456–1460.

[12] M. Hojo, R. Sakuragi, S. Okabe, A. Hosomi, *Chem. Commun.* **2001**, *4*, 357–358.

## ■ Examining the Influence of Base

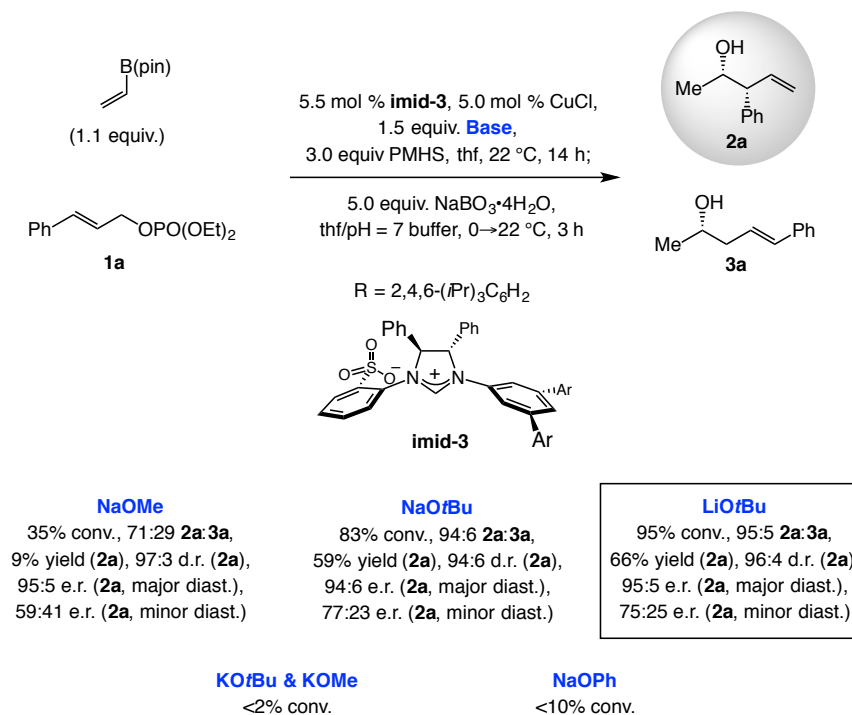

■ **Representative Procedure:** In an N<sub>2</sub>-filled glove box, an oven-dried 2-dram vial with magnetic stir bar was charged with CuCl (0.5 mg, 0.005 mmol), **imid-3** (4.70 mg, 0.0055 mmol), LiOtBu (12 mg, 0.15 mmol), and freshly distilled tetrahydrofuran (thf, 0.5 mL). The mixture was premixed for 1 h before PMHS (18 mg, 0.30 mmol) and additional thf (0.5 mL) were added. The solution immediately turned dark red. After 1 min, vinyl boronic acid pinacol ester (17 mg, 0.11 mmol), allylic phosphate (27 mg, 0.10 mmol), and thf (0.5 mL) were added. The vial was sealed with electrical tape before removal from the glove box, and the resulting mixture was allowed to stir at 22 °C for 14 h. The mixture was passed through a short plug of basified silica gel (4 cm x 1 cm, 1% of triethylamine) and eluted with Et<sub>2</sub>O. Removal of the volatiles *in vacuo* afforded bright yellow oil. To the oil was added thf (1.0 mL), pH = 7.0 buffer solution (1.0 mL), and NaBO<sub>3</sub>·4H<sub>2</sub>O (77 mg, 0.50 mmol) at 0 °C. The mixture was then allowed to stir at 22 °C for 3 h after which it was washed with Et<sub>2</sub>O (3 x 1.0 mL) and the combined organic layers were passed through a short plug of MgSO<sub>4</sub>, concentrated and purified by silica gel chromatography (hexanes:Et<sub>2</sub>O = 10:5, R<sub>f</sub> = 0.2) to afford the desired product as colorless oil (10.7 mg, 0.066 mmol, 66% yield). The racemic sample was prepared by the same procedure except through the use of 10 mol % **imid-4** and CuCl.

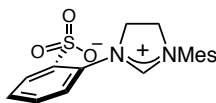

**imid-4**

**(2*S*,3*R*)-3-Phenylpent-4-en-2-ol (2a):** IR (neat): 3407 (br s) 2972 (w), 2924 (w), 1638 (w), 1493 (w), 1268 (w), 1116 (m), 1056 (m), 993 (m), 757 (m), 700 (s), 672 (m), 530 (m) cm<sup>-1</sup>; <sup>1</sup>H NMR

(400 MHz, CDCl<sub>3</sub>):  $\delta$  7.40–7.33 (2H, m), 7.27–7.24 (3H, m), 6.09–6.00 (1H, m), 5.16–5.11 (2H, m), 4.07–4.03 (1H, m), 3.25 (1H, t,  $J$  = 8.2 Hz), 1.47 (1H, br), 1.24 (3H, dd,  $J$  = 6.0, 0.8 Hz); <sup>13</sup>C NMR (100 MHz, CDCl<sub>3</sub>):  $\delta$  141.0, 138.5, 129.0, 128.6, 127.1, 117.1, 70.6, 59.1, 20.9; HRMS (DART): Calcd for C<sub>11</sub>H<sub>13</sub> [M+H–H<sub>2</sub>O]<sup>+</sup>: 145.1017; Found: 145.1013; Specific rotation:  $[\alpha]_D^{20}$  – 65.02 ( $c$  0.61, CHCl<sub>3</sub>) for a >98% S<sub>N</sub>2', 96:4 d.r., and 95:5 e.r. sample. Enantiomeric purity of **2a** was determined by HPLC analysis in comparison with authentic racemic material (95:5 e.r. shown; chiralcel OD–H column, 99:1 hexanes:*i*PrOH, 0.3 mL/min, 220 nm).

### Enantiomeric purity of the major diastereomers

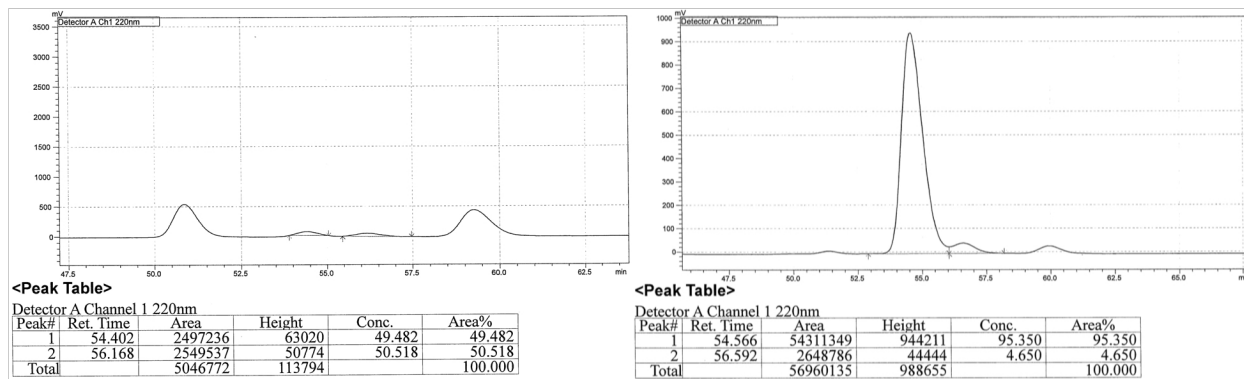

### Enantiomeric purity of the minor diastereomers

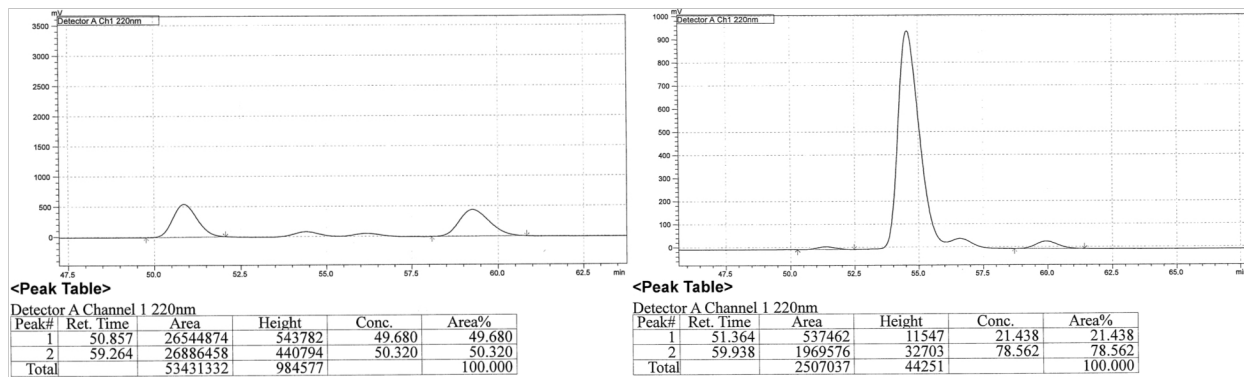

| Peak # | Retention time | Area     | Area % | Peak # | Retention time | Area     | Area % |
|--------|----------------|----------|--------|--------|----------------|----------|--------|
| 1      | 54.402         | 2497236  | 49.482 | 1      | 54.566         | 54311349 | 95.350 |
| 2      | 56.168         | 2549537  | 50.518 | 2      | 56.592         | 2648786  | 4.650  |
| 1      | 50.857         | 26544874 | 49.680 | 1      | 51.364         | 537462   | 21.438 |
| 2      | 59.264         | 26886458 | 50.320 | 2      | 59.938         | 1969576  | 78.562 |

**(2*S*,3*R*)-3-(2-Fluorophenyl)pent-4-en-2-ol (2b)**: IR (CH<sub>2</sub>Cl<sub>2</sub>): 3209 (br s), 2925 (m), 1638 (w), 1490 (m), 1454 (m), 1375 (m), 1119 (s), 1058 (s), 800 (w), 753 (s), 603 (w), 401 (m) cm<sup>-1</sup>; <sup>1</sup>H NMR (400 MHz, CDCl<sub>3</sub>):  $\delta$  7.34–7.29 (1H, m), 7.25–7.20 (1H, m), 7.15–7.11 (1H, m), 7.08–7.03 (1H, m), 6.11–6.02 (1H, m), 5.18–5.14 (2H, m), 4.18–4.12 (1H, m), 3.62 (1H, t,  $J$  = 8.4 Hz), 1.45 (1H, d,  $J$  = 4.4 Hz), 1.24 (3H, d,  $J$  = 6.4 Hz); <sup>13</sup>C NMR (100 MHz, CDCl<sub>3</sub>):  $\delta$  161.1 (d,  $J_{CF}$  = 244.4 Hz), 137.3, 129.9 (d,  $J_{CF}$  = 4.6 Hz), 128.4 (d,  $J_{CF}$  = 8.4 Hz), 127.9 (d,  $J_{CF}$  = 14.4 Hz), 124.4 (d,  $J_{CF}$  = 3.0 Hz), 117.6, 115.9 (d,  $J_{CF}$  = 22.8 Hz), 69.8, 51.9, 21.2; HRMS (DART): Calcd



for  $C_{11}H_{12}F [M+H-H_2O]^+$ : 163.0929; Found: 163.0923; Specific rotation:  $[\alpha]_D^{20} -44.30$  ( $c$  0.46,  $CHCl_3$ ) for a >98%  $S_N2'$ , 93:7 d.r., and 95:5 e.r. sample. Enantiomeric purity of **2b** was determined by HPLC analysis in comparison with authentic racemic material (95:5 e.r. shown; chiralcel AD-H column, 99:1 hexanes:*i*PrOH, 0.3 mL/min, 220 nm).

*Enantiomeric purity of the major diastereomers*

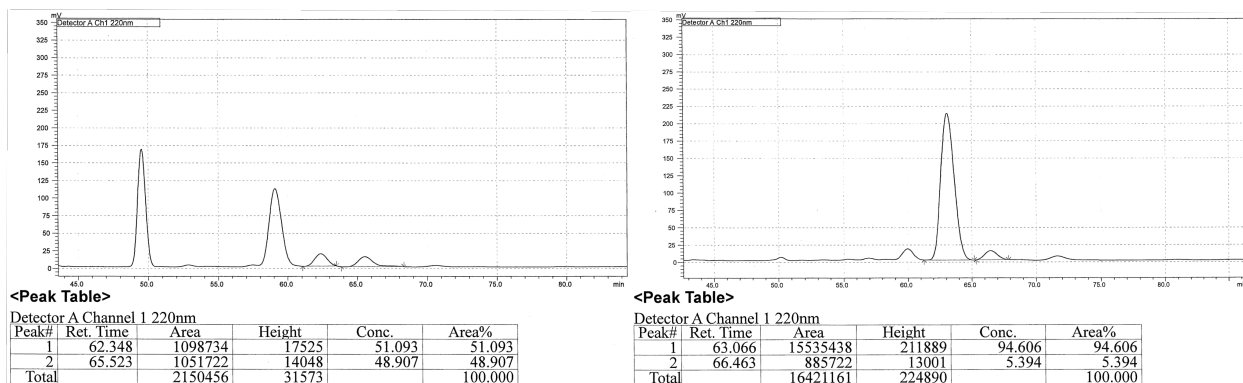

*Enantiomeric purity of the minor diastereomers*

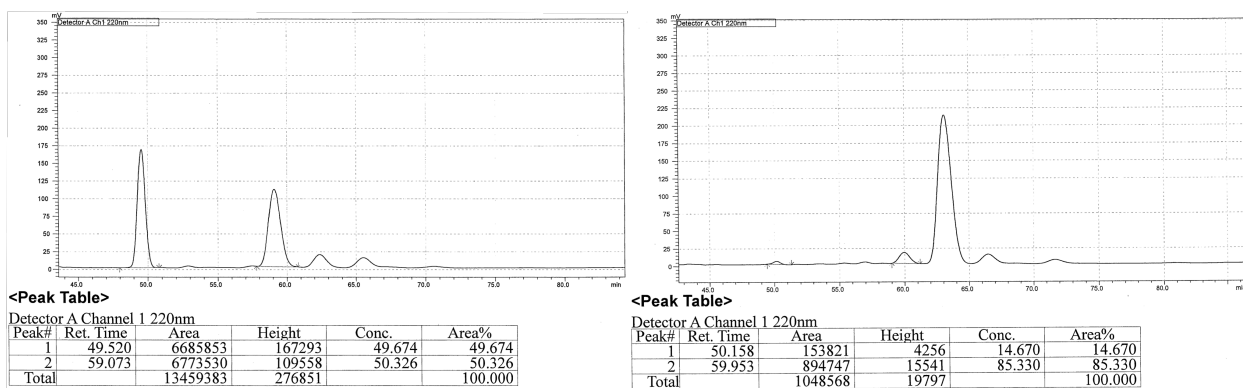

| Peak # | Retention time | Area    | Area % | Peak # | Retention time | Area     | Area % |
|--------|----------------|---------|--------|--------|----------------|----------|--------|
| 1      | 62.348         | 1098734 | 51.093 | 1      | 63.066         | 15535438 | 94.606 |
| 2      | 65.523         | 1051722 | 48.907 | 2      | 66.463         | 885722   | 5.394  |
| 1      | 49.520         | 6685853 | 49.674 | 1      | 50.158         | 153821   | 14.670 |
| 2      | 59.073         | 6773530 | 50.326 | 2      | 59.953         | 894747   | 85.330 |

**(2*S*,3*R*)-3-(2-Bromophenyl)pent-4-en-2-ol (2c):** IR ( $CH_2Cl_2$ ): 3419 (br s), 2974 (w), 1637 (w), 1437 (m), 1266 (m), 1107 (s), 1020 (s), 993 (m), 816 (w), 422 (m)  $cm^{-1}$ ;  $^1H$  NMR (400 MHz,  $CDCl_3$ ):  $\delta$  7.59 (1H, dd,  $J = 7.6, 0.8$  Hz), 7.38 (1H, dd,  $J = 7.6, 1.6$  Hz), 7.33–7.29 (1H, m), 7.12–7.01 (1H, m), 6.03–5.94 (1H, m), 5.19–5.14 (2H, m), 4.21–4.13 (1H, m), 3.95 (1H, t,  $J = 7.6$  Hz), 1.46 (1H, d,  $J = 4.4$  Hz), 1.27 (3H, d,  $J = 6.4$  Hz);  $^{13}C$  NMR (100 MHz,  $CDCl_3$ ):  $\delta$  140.1, 137.5, 133.5, 129.2, 128.3, 127.8, 126.0, 117.9, 70.2, 56.4, 21.0; HRMS (DART): Calcd for  $C_{11}H_{12}Br [M+H-H_2O]^+$ : 223.0122; Found: 223.0122; Specific rotation:  $[\alpha]_D^{20} -20.07$  ( $c$  1.12,  $CHCl_3$ ) for a >98%  $S_N2'$ , 90:10 d.r., and 98:2 e.r. sample. Enantiomeric purity of **2c** was determined by HPLC analysis in comparison with authentic racemic material (98:2 e.r. shown;

chiralcel OD-H column, 99:1 hexanes:*i*PrOH, 0.3 mL/min, 220 nm).

### Enantiomeric purity of the major diastereomers

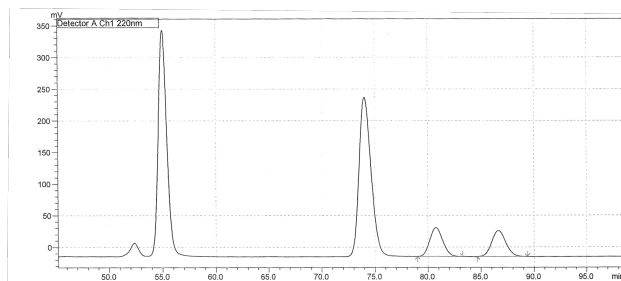

<Peak Table>

| Peak# | Ret. Time | Area    | Height | Conc.  | Area%   |
|-------|-----------|---------|--------|--------|---------|
| 1     | 80.743    | 3892381 | 45554  | 50.593 | 50.593  |
| 2     | 86.625    | 3801200 | 40914  | 49.407 | 49.407  |
| Total |           | 7693582 | 86469  |        | 100.000 |

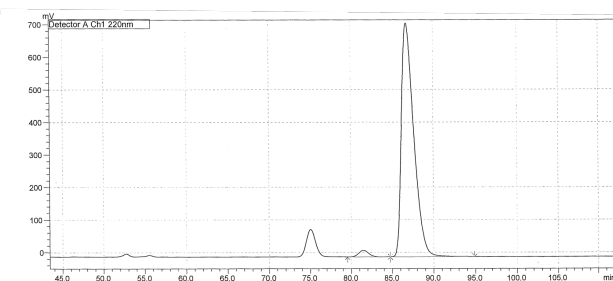

<Peak Table>

| Peak# | Ret. Time | Area     | Height | Conc.  | Area%   |
|-------|-----------|----------|--------|--------|---------|
| 1     | 81.459    | 1735145  | 20275  | 2.279  | 2.279   |
| 2     | 86.755    | 74391917 | 718863 | 97.721 | 97.721  |
| Total |           | 76127062 | 739137 |        | 100.000 |

### Enantiomeric purity of the minor diastereomers

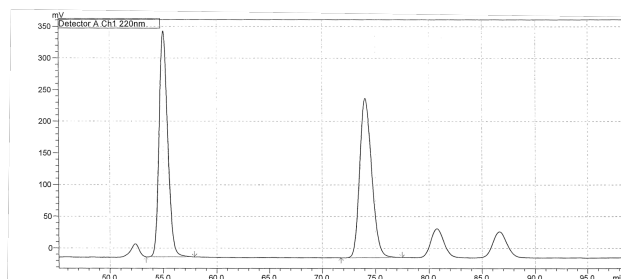

<Peak Table>

| Peak# | Ret. Time | Area     | Height | Conc.  | Area%   |
|-------|-----------|----------|--------|--------|---------|
| 1     | 55.004    | 19766804 | 356754 | 49.918 | 49.918  |
| 2     | 74.047    | 19832077 | 251709 | 50.082 | 50.082  |
| Total |           | 39598882 | 608463 |        | 100.000 |

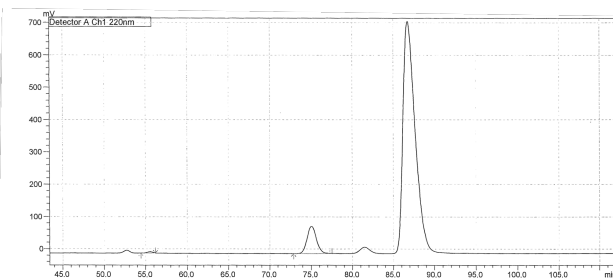

<Peak Table>

| Peak# | Ret. Time | Area    | Height | Conc.  | Area%   |
|-------|-----------|---------|--------|--------|---------|
| 1     | 55.505    | 188295  | 4070   | 2.759  | 2.759   |
| 2     | 75.029    | 6637342 | 84243  | 97.241 | 97.241  |
| Total |           | 6825637 | 88313  |        | 100.000 |

| Peak # | Retention time | Area     | Area % | Peak # | Retention time | Area     | Area % |
|--------|----------------|----------|--------|--------|----------------|----------|--------|
| 1      | 80.743         | 3892381  | 50.593 | 1      | 81.459         | 1735145  | 2.279  |
| 2      | 86.625         | 3801200  | 49.407 | 2      | 86.755         | 74391917 | 97.721 |
| 1      | 55.004         | 19766804 | 49.918 | 1      | 55.505         | 188295   | 2.759  |
| 2      | 74.047         | 19832077 | 50.082 | 2      | 75.029         | 6637342  | 97.241 |

**(2*S*,3*R*)-3-(2-Methoxyphenyl)pent-4-en-2-ol (2d)**: IR (CH<sub>2</sub>Cl<sub>2</sub>): 3423 (br s), 2926 (w), 1637 (w), 1491 (m), 1463 (m), 1170 (s), 1120 (m), 1026 (s), 915 (m), 879 (w), 579 (m), 400 (m) cm<sup>-1</sup>; <sup>1</sup>H NMR (400 MHz, CDCl<sub>3</sub>): δ 7.26–7.21 (2H, m), 6.98–6.94 (1H, m), 6.09 (1H, d, *J* = 8.4 Hz), 6.15–6.06 (1H, m), 5.15–5.08 (1H, m), 4.19–4.11 (1H, m), 3.83 (3H, s), 3.74 (1H, t, *J* = 8.0 Hz), 1.70 (1H, d, *J* = 4.4 Hz), 1.22 (3H, d, *J* = 6.4 Hz); <sup>13</sup>C NMR (100 MHz, CDCl<sub>3</sub>): δ 1.57.5, 138.2, 129.2, 128.0, 121.1, 116.8, 111.2, 69.8, 55.6, 52.5, 21.1; HRMS (DART): Calcd for C<sub>12</sub>H<sub>15</sub>O [M+H-H<sub>2</sub>O]<sup>+</sup>: 175.1123; Found: 175.1123; Specific rotation: [α]<sub>D</sub><sup>20</sup> -36.14 (*c* 1.16, CHCl<sub>3</sub>) for a >98% S<sub>N</sub>2', 92:8 d.r., and 98:2 e.r. sample. Enantiomeric purity of **2d** was determined by HPLC analysis in comparison with authentic racemic material (98:2 e.r. shown; chiralcel OD-H column, 98:2 hexanes:*i*PrOH, 0.3 mL/min, 220 nm).

## Enantiomeric purity of the major diastereomers

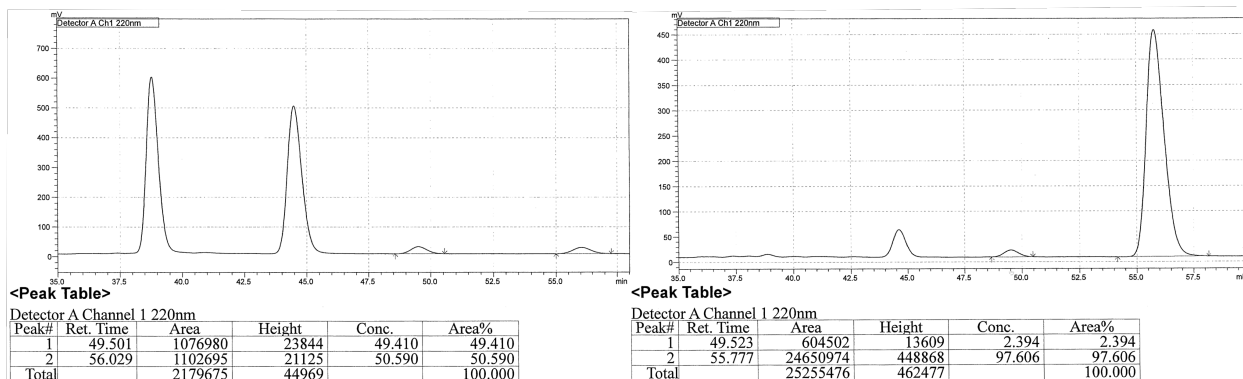

## Enantiomeric purity of the minor diastereomers

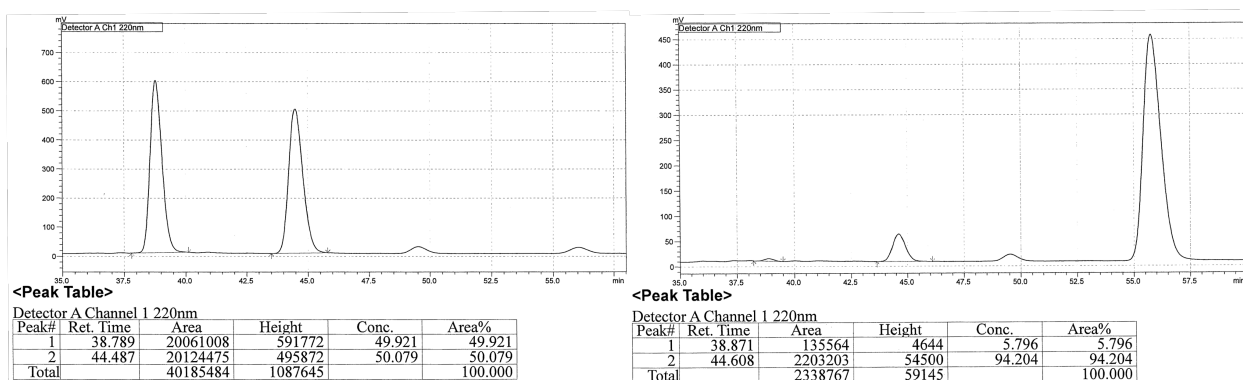

| Peak # | Retention time | Area     | Area % | Peak # | Retention time | Area     | Area % |
|--------|----------------|----------|--------|--------|----------------|----------|--------|
| 1      | 49.501         | 1076980  | 49.410 | 1      | 49.523         | 604502   | 2.394  |
| 2      | 56.029         | 1102695  | 50.590 | 2      | 55.777         | 24650974 | 97.606 |
| 1      | 38.789         | 20061008 | 49.921 | 1      | 38.871         | 135564   | 5.796  |
| 2      | 44.487         | 20124475 | 50.079 | 2      | 44.608         | 2203203  | 94.204 |

**(2*S*,3*R*)-3-(*o*-Tolyl)pent-4-en-2-ol (2e):** IR (CH<sub>2</sub>Cl<sub>2</sub>): 3424 (br s), 2955 (m), 2854 (m), 1636 (w), 1490 (m), 1460 (m), 1118 (s), 1057 (s), 992 (m), 914 (s), 880 (m), 753 (s), 633 (m), 547 (m), 408 (m) cm<sup>-1</sup>; <sup>1</sup>H NMR (400 MHz, CDCl<sub>3</sub>): δ 7.30–7.12 (4H, m), 5.97–5.88 (1H, m), 5.10–5.05 (2H, m), 4.12 (1H, pent, *J* = 6.7 Hz), 3.55 (1H, t, *J* = 8.6 Hz), 2.36 (3H, s), 1.56 (1H, br), 1.30 (3H, d, *J* = 6.4 Hz); <sup>13</sup>C NMR (100 MHz, CDCl<sub>3</sub>): δ 139.6, 138.5, 137.4, 137.1, 131.1, 126.7, 126.7, 116.8, 70.3, 54.3, 20.9, 20.0; HRMS (DART): Calcd for C<sub>12</sub>H<sub>15</sub> [M+H–H<sub>2</sub>O]<sup>+</sup>: 159.1174; Found: 159.1172; Specific rotation: [α]<sub>D</sub><sup>20</sup> –44.38 (*c* 0.73, CHCl<sub>3</sub>) for a >98% S<sub>N</sub>2', 90:10 d.r., and 97:3 e.r. sample. Enantiomeric purity of **2e** was determined by HPLC analysis in comparison with authentic racemic material (97:3 e.r. shown; chiralcel OD–H column, 99:1 hexanes:*i*PrOH, 0.3 mL/min, 220 nm).

## Enantiomeric purity of the major diastereomers

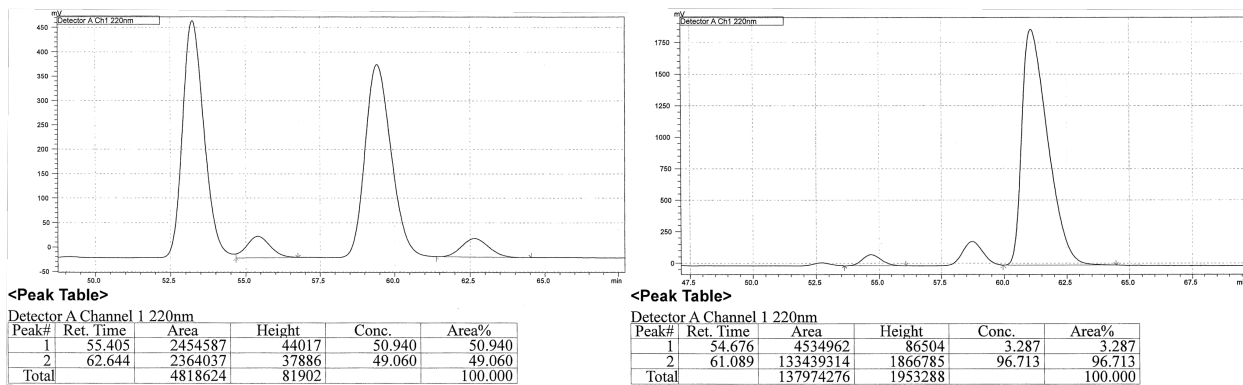

## Enantiomeric purity of the minor diastereomers

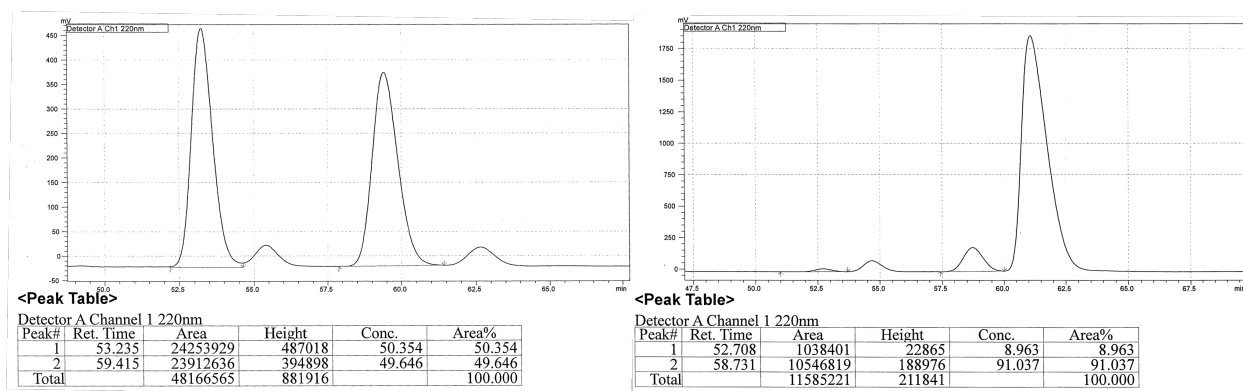

| Peak # | Retention time | Area     | Area % | Peak # | Retention time | Area      | Area % |
|--------|----------------|----------|--------|--------|----------------|-----------|--------|
| 1      | 55.405         | 2454587  | 50.940 | 1      | 54.676         | 4534962   | 3.287  |
| 2      | 62.644         | 2364037  | 49.060 | 2      | 61.089         | 133439314 | 96.713 |
| 1      | 53.235         | 24253929 | 50.354 | 1      | 52.708         | 22865     | 8.963  |
| 2      | 59.415         | 23912636 | 49.646 | 2      | 58.731         | 188976    | 91.037 |

**(2*S*,3*R*)-3-(Naphthalen-2-yl)pent-4-en-2-ol (2f)**: IR (CH<sub>2</sub>Cl<sub>2</sub>): 3423 (br s), 2971 (w), 1634 (w), 1599 (w), 1507 (w), 1370 (m), 1113 (s), 1056 (m), 1018 (m), 916 (s), 855 (m), 815 (s), 685 (m), 476 (s) cm<sup>-1</sup>; <sup>1</sup>H NMR (400 MHz, CDCl<sub>3</sub>): δ 7.85–7.81 (3H, m), 7.72 (1H, s), 7.51–7.44 (2H, m), 7.41 (1H, dd, *J* = 8.4, 1.6 Hz), 6.18–6.09 (1H, m), 5.20–5.16 (2H, m), 4.21–4.14 (1H, m), 3.43 (1H, t, *J* = 8.0 Hz), 1.52 (1H, d, *J* = 3.6 Hz), 1.29 (3H, d, *J* = 6.4 Hz); <sup>13</sup>C NMR (100 MHz, CDCl<sub>3</sub>): δ 138.5, 138.4, 133.7, 132.7, 128.7, 127.8, 127.79, 127.4, 126.6, 126.3, 125.9, 117.3, 70.5, 59.2, 20.9; HRMS (DART): Calcd for C<sub>15</sub>H<sub>15</sub> [M+H-H<sub>2</sub>O]<sup>+</sup>: 195.1174; Found: 195.1174; Specific rotation: [α]<sub>D</sub><sup>20</sup> -73.27 (*c* 1.35, CHCl<sub>3</sub>) for a >98% S<sub>N</sub>2', 95:5 d.r., and 95:5 e.r. sample. Enantiomeric purity of **2f** was determined by HPLC analysis in comparison with authentic racemic material (95:5 e.r. shown; chiralcel AD-H column, 99:1 hexanes:*i*PrOH, 0.3 mL/min, 220 nm).

## Enantiomeric purity of the major diastereomers

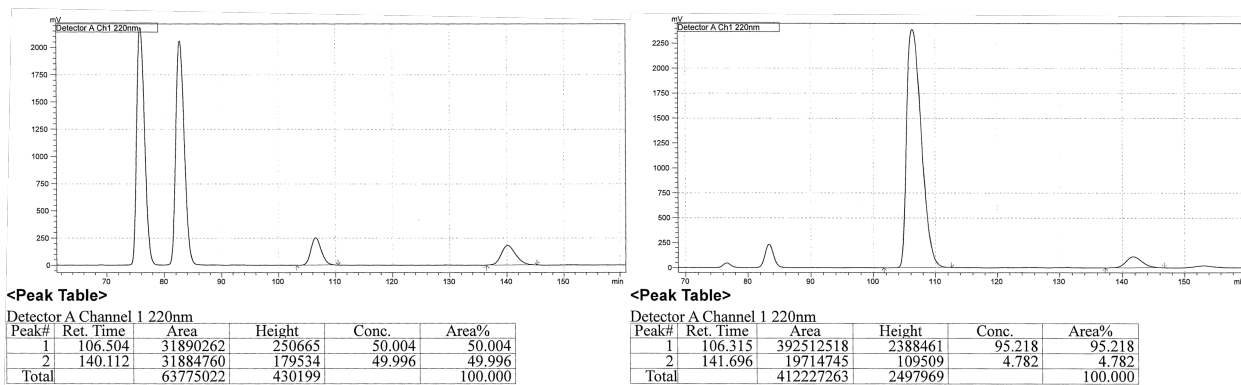

## Enantiomeric purity of the minor diastereomers

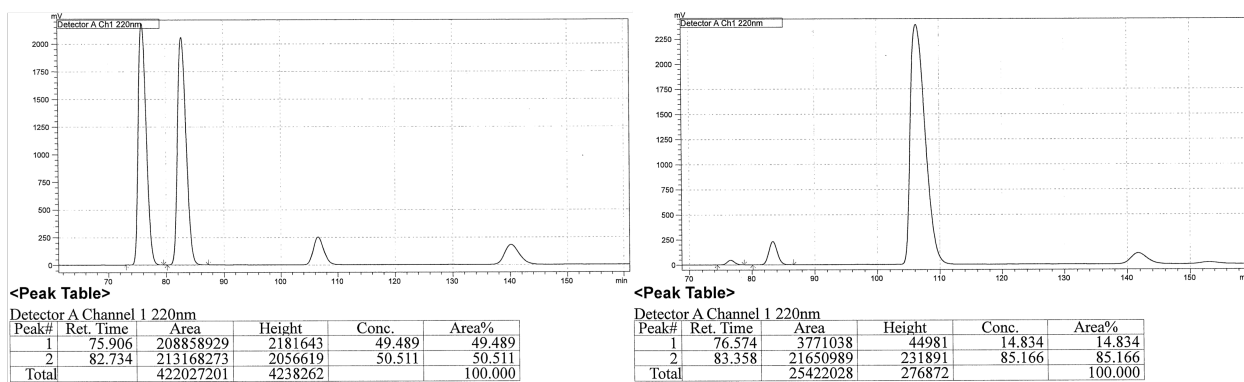

| Peak # | Retention time | Area      | Area % | Peak # | Retention time | Area      | Area % |
|--------|----------------|-----------|--------|--------|----------------|-----------|--------|
| 1      | 106.504        | 31890262  | 50.004 | 1      | 106.315        | 392512518 | 95.218 |
| 2      | 140.112        | 31884760  | 49.996 | 2      | 141.696        | 19714745  | 4.782  |
| 1      | 75.906         | 208858929 | 49.489 | 1      | 76.574         | 3771038   | 14.834 |
| 2      | 82.734         | 213168273 | 50.511 | 2      | 83.358         | 21650989  | 85.166 |

**(2*S*,3*R*)-3-(3-Bromophenyl)pent-4-en-2-ol (2g)**: IR (CH<sub>2</sub>Cl<sub>2</sub>): 3386 (br s), 2924 (m), 1638 (w), 1592 (m), 1566 (m), 1474 (m), 1427 (w), 1193 (s), 1072 (s), 919 (s), 779 (s), 438 (m) cm<sup>-1</sup>; <sup>1</sup>H NMR (400 MHz, CDCl<sub>3</sub>): δ 7.42–7.36 (2H, m), 7.24–7.18 (2H, m), 5.99 (1H, ddd *J* = 17.2, 10.8, 8.8 Hz), 5.18–5.11 (2H, m), 4.09–4.01 (1H, m), 3.22 (1H, t, *J* = 8.0 Hz), 1.47 (1H, br), 1.23 (3H, d, *J* = 6.0 Hz); <sup>13</sup>C NMR (CDCl<sub>3</sub>, 100 MHz): δ 143.5, 137.9, 131.6, 130.4, 130.2, 127.3, 123.0, 117.6, 70.5, 58.6, 21.0; HRMS (DART): Calcd for C<sub>11</sub>H<sub>12</sub>Br [M+H–H<sub>2</sub>O]<sup>+</sup>: 223.0122; Found: 223.0128; Specific rotation: [α]<sub>D</sub><sup>20</sup> –52.90 (*c* 2.60, CHCl<sub>3</sub>) for a >98% S<sub>N</sub>2', 94:6 d.r., and 96:4 e.r. sample. Enantiomeric purity of **2g** was determined by HPLC analysis in comparison with authentic racemic material (96:4 e.r. shown; chiralcel OD–H column, 99:1 hexanes:*i*PrOH, 0.3 mL/min, 220 nm).

## Enantiomeric purity of the major diastereomers

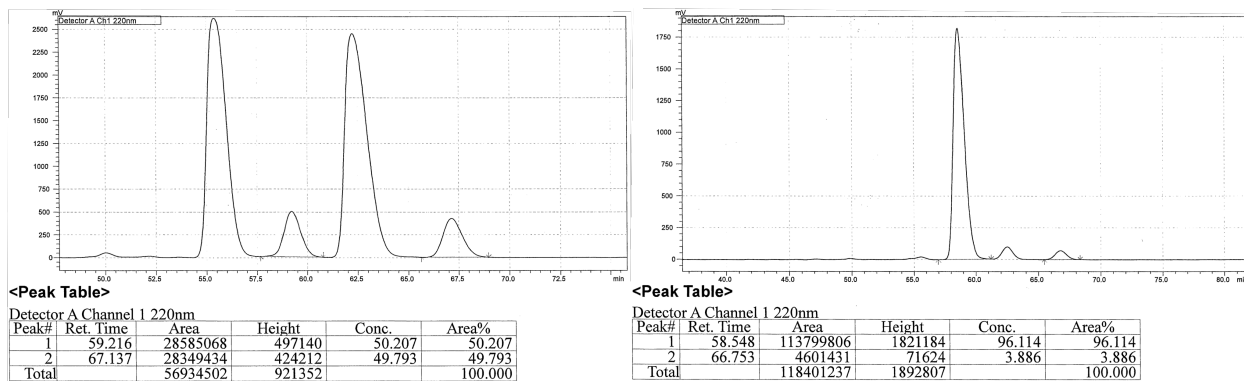

## Enantiomeric purity of the minor diastereomers

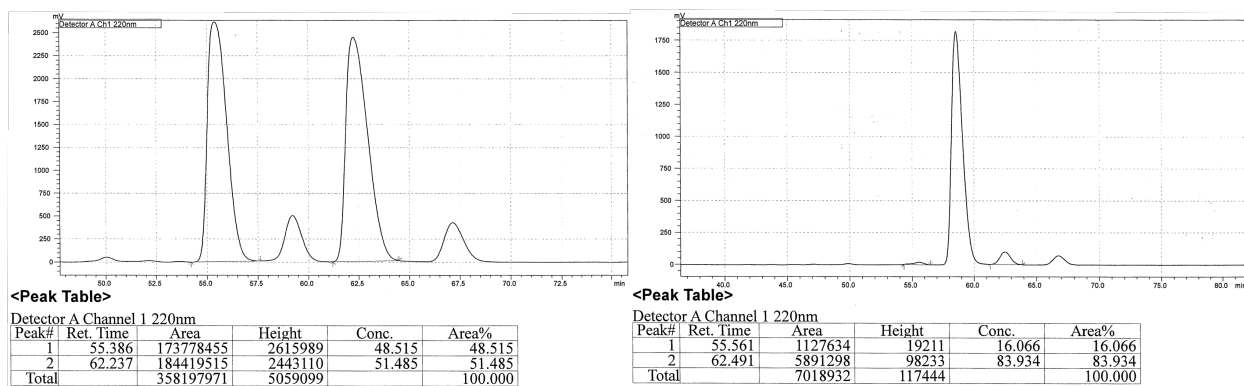

| Peak # | Retention time | Area      | Area % | Peak # | Retention time | Area      | Area % |
|--------|----------------|-----------|--------|--------|----------------|-----------|--------|
| 1      | 59.216         | 28585068  | 50.207 | 1      | 58.548         | 113799806 | 96.114 |
| 2      | 67.137         | 28349434  | 49.793 | 2      | 66.753         | 4601431   | 3.886  |
| 1      | 55.386         | 173778455 | 48.515 | 1      | 55.561         | 1127634   | 16.066 |
| 2      | 62.237         | 184419515 | 51.485 | 2      | 62.491         | 5891298   | 83.934 |

**(2*S*,3*R*)-3-(3-Methoxyphenyl)pent-4-en-2-ol (2h)**: IR (CH<sub>2</sub>Cl<sub>2</sub>): 3402 (br s), 2974 (w), 1599 (m), 1488 (m), 1155 (m), 1118 (s), 1043 (s), 995 (m), 916 (m), 849 (w), 594 (m), 410 (m) cm<sup>-1</sup>; <sup>1</sup>H NMR (400 MHz, CDCl<sub>3</sub>): δ 7.29–7.25 (1H, m), 6.89–6.84 (1H, m), 6.81–6.78 (2H, m), 6.01 (1H, ddd, *J* = 17.2, 10.4, 8.4 Hz), 5.16–5.11 (2H, m), 4.08–3.99 (1H, m), 3.81 (3H, s), 3.21 (1H, t, *J* = 8.4 Hz), 1.50 (1H, d, *J* = 3.6 Hz), 1.24 (3H, d, *J* = 6.4 Hz); <sup>13</sup>C NMR (100 MHz, CDCl<sub>3</sub>): δ 160.1, 142.7, 138.4, 130.0, 120.7, 117.1, 114.4, 112.3, 70.6, 59.3, 55.3, 20.8; HRMS (DART): Calcd for C<sub>12</sub>H<sub>15</sub>O [M+H–H<sub>2</sub>O]<sup>+</sup>: 175.1123; Found: 175.1129; Specific rotation: [α]<sub>D</sub><sup>20</sup> –47.84 (*c* 1.30, CHCl<sub>3</sub>) for a >98% S<sub>N</sub>2', 95:5 d.r., and 96:4 e.r. sample. Enantiomeric purity of **2h** was determined by HPLC analysis in comparison with authentic racemic material (96:4 e.r. shown; chiralcel AD–H column, 98:2 hexanes:*i*PrOH, 0.3 mL/min, 220 nm).

## Enantiomeric purity of the major diastereomers

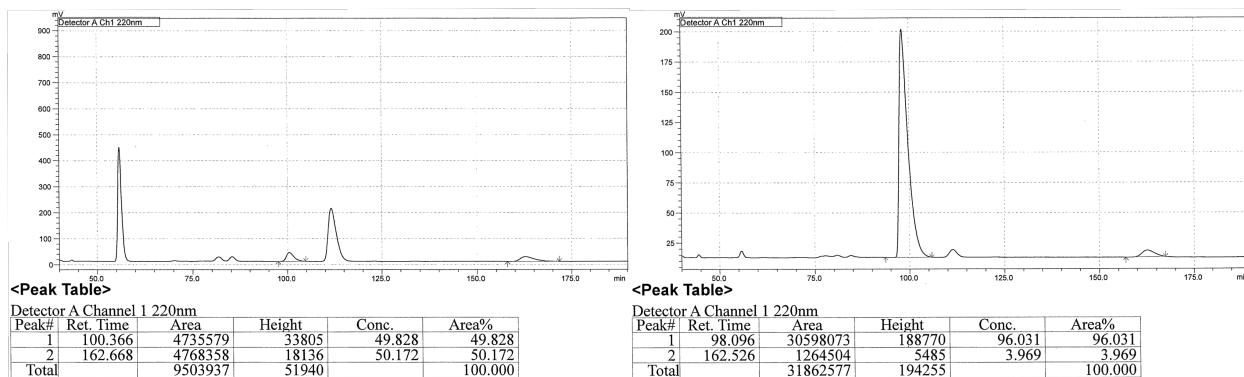

## Enantiomeric purity of the minor diastereomers

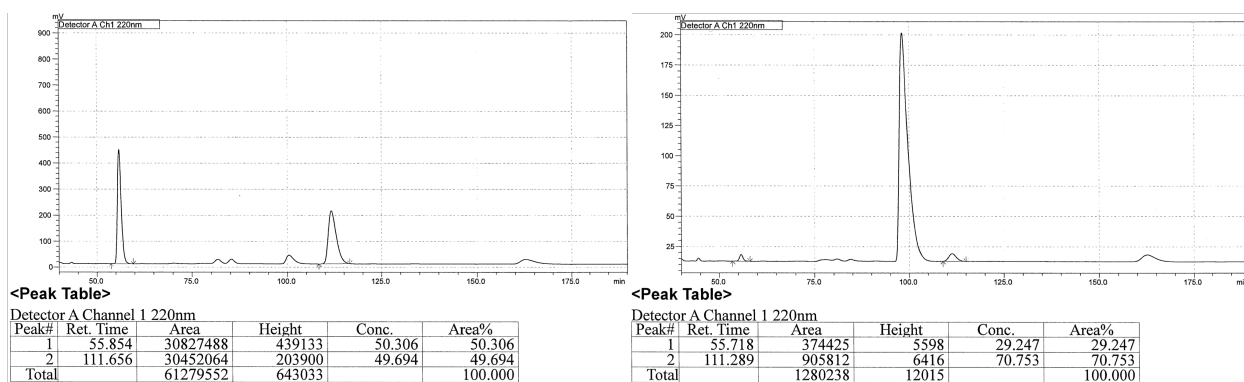

| Peak # | Retention time | Area     | Area % | Peak # | Retention time | Area     | Area % |
|--------|----------------|----------|--------|--------|----------------|----------|--------|
| 1      | 100.366        | 4735579  | 49.828 | 1      | 98.096         | 30598073 | 96.031 |
| 2      | 162.668        | 4768358  | 50.172 | 2      | 162.526        | 1264504  | 3.969  |
| 1      | 55.854         | 30827488 | 50.306 | 1      | 55.718         | 374425   | 29.247 |
| 2      | 111.656        | 30452064 | 49.694 | 2      | 111.289        | 905812   | 70.753 |

**(2*S*,3*R*)-3-(4-Chlorophenyl)pent-4-en-2-ol (2i)**: IR (CH<sub>2</sub>Cl<sub>2</sub>): 3399 (br s), 2973 (w), 1637 (w), 1490 (s), 1374 (m), 1090 (s), 992 (s), 918 (s), 818 (s), 626 (m), 530 (s), 412 (m) cm<sup>-1</sup>; <sup>1</sup>H NMR (400 MHz, CDCl<sub>3</sub>): δ 7.33–7.26 (2H, m), 7.21–7.19 (2H, m), 6.0 (1H, ddd, *J* = 16.8, 10.4, 8.4 Hz), 5.16–5.09 (2H, m), 4.08–4.00 (1H, m), 3.24 (1H, t, *J* = 8.0 Hz), 1.42 (1H, d, *J* = 4.0 Hz), 1.22 (3H, d, *J* = 6.4 Hz); <sup>13</sup>C NMR (100 MHz, CDCl<sub>3</sub>): δ 139.5, 138.1, 132.8, 130.0, 129.0, 117.4, 70.5, 58.2, 21.0; HRMS (DART): Calcd for C<sub>11</sub>H<sub>12</sub>Cl [M+H–H<sub>2</sub>O]<sup>+</sup>: 179.0628; Found: 179.0634; Specific rotation: [α]<sub>D</sub><sup>20</sup> –70.10 (*c* 1.73, CHCl<sub>3</sub>) for a >98% S<sub>N</sub>2', 95:5 d.r., and 95:5 e.r. sample. Enantiomeric purity of **2i** was determined by HPLC analysis in comparison with authentic racemic material (95:5 e.r. shown; chiralcel AD–H column, 99:1 hexanes:*i*PrOH, 0.3 mL/min, 220 nm).

## Enantiomeric purity of the major diastereomers

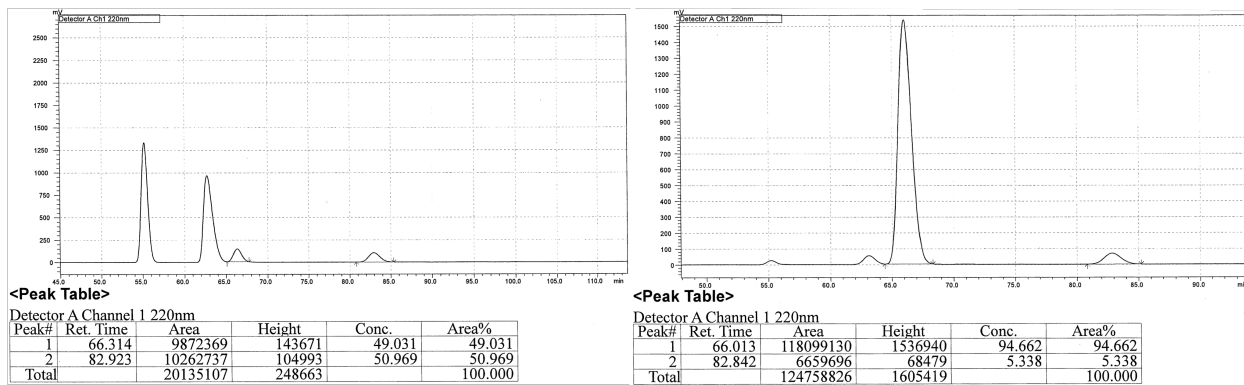

## Enantiomeric purity of the minor diastereomers

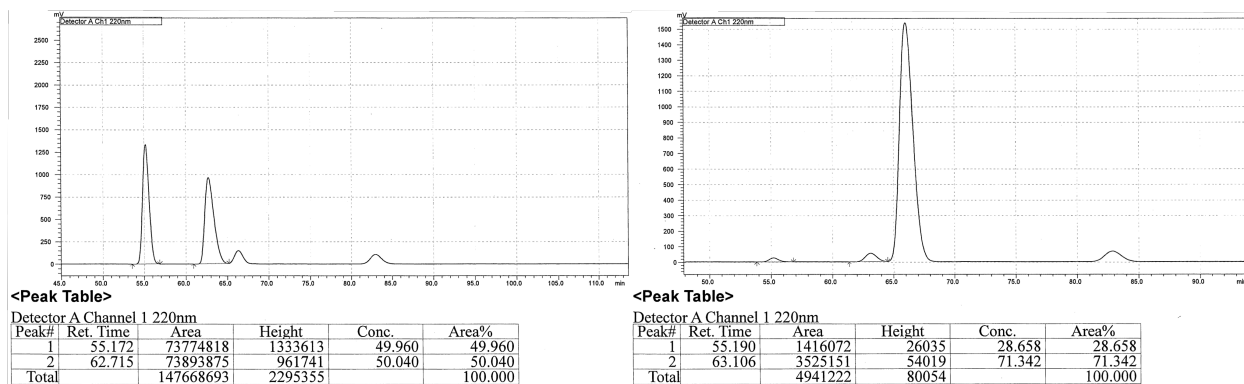

| Peak # | Retention time | Area     | Area % | Peak # | Retention time | Area      | Area % |
|--------|----------------|----------|--------|--------|----------------|-----------|--------|
| 1      | 66.314         | 9872369  | 49.031 | 1      | 66.013         | 118099130 | 94.662 |
| 2      | 82.923         | 10262737 | 50.969 | 2      | 82.842         | 6659696   | 5.338  |
| 1      | 55.172         | 73774818 | 49.960 | 1      | 55.190         | 1416072   | 28.658 |
| 2      | 62.715         | 73893875 | 50.040 | 2      | 63.106         | 3525151   | 71.342 |

**(2*S*,3*R*)-3-(4-Bromophenyl)pent-4-en-2-ol (2j)**: White solid; m.p. = 46–47 °C; IR (CH<sub>2</sub>Cl<sub>2</sub>): 3400 (br s), 3078 (w), 2973 (w), 1637 (w), 1590 (s), 1487 (m), 1193 (s), 1117 (s), 1072 (s), 1010 (m), 918 (s), 617 (m), 527 (s), 412 (m) cm<sup>-1</sup>; <sup>1</sup>H NMR (600 MHz, CDCl<sub>3</sub>): δ 7.47 (2H, d, *J* = 7.8 Hz), 7.14 (2H, d, *J* = 8.4 Hz), 5.99 (1H, ddd, *J* = 16.8, 10.8, 9.0 Hz), 5.16–5.10 (2H, m), 4.06–4.01 (1H, m), 3.22 (1H, t, *J* = 8.4 Hz), 1.42 (1H, d, *J* = 3.6 Hz), 1.22 (3H, d, *J* = 6.6 Hz); <sup>13</sup>C NMR (100 MHz, CDCl<sub>3</sub>): δ 140.1, 138.0, 132.0, 130.4, 120.9, 117.5, 70.5, 58.2, 21.0; HRMS (DART): Calcd for C<sub>11</sub>H<sub>12</sub>Br [M+H–H<sub>2</sub>O]<sup>+</sup>: 223.0122; Found: 223.0123; Specific rotation: [α]<sub>D</sub><sup>20</sup> –64.88 (*c* 1.55, CHCl<sub>3</sub>) for a >98% S<sub>N</sub>2', 95:5 d.r., and 94:6 e.r. sample. Enantiomeric purity of **2j** was determined by HPLC analysis in comparison with authentic racemic material (94:6 e.r. shown; chiralcel AZ–H column, 99:1 hexanes:*i*PrOH, 0.3 mL/min, 220 nm).



## Enantiomeric purity of the major diastereomers

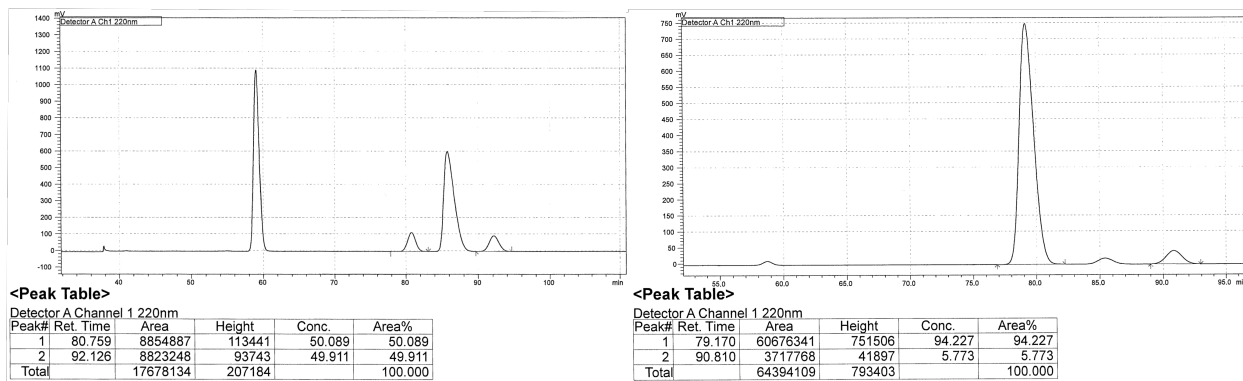

## Enantiomeric purity of the minor diastereomers

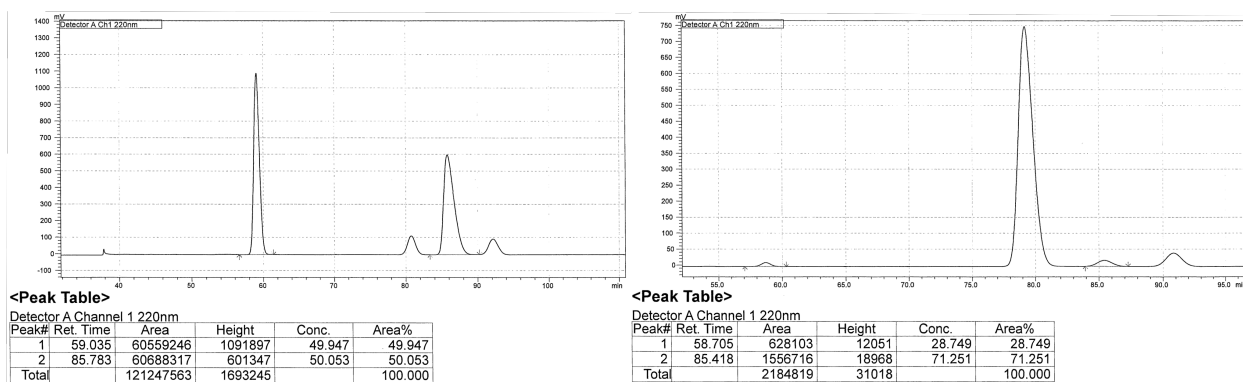

| Peak # | Retention time | Area     | Area % | Peak # | Retention time | Area     | Area % |
|--------|----------------|----------|--------|--------|----------------|----------|--------|
| 1      | 80.759         | 8854887  | 50.089 | 1      | 79.170         | 60676341 | 94.227 |
| 2      | 92.126         | 8823248  | 49.911 | 2      | 90.810         | 41897    | 5.773  |
| 1      | 59.035         | 60559246 | 49.947 | 1      | 58.705         | 628103   | 28.749 |
| 2      | 87.783         | 60688317 | 50.053 | 2      | 85.418         | 1556716  | 71.251 |

**(2*S*,3*R*)-3-(4-(Trifluoromethyl)phenyl)pent-4-en-2-ol (2k):** IR (CH<sub>2</sub>Cl<sub>2</sub>): 3412 (br, s), 2977 (w), 1638 (w), 1323 (s), 1162 (m), 1118 (s), 1066 (s), 1018 (m), 921 (m), 835 (m), 405 (m) cm<sup>-1</sup>; <sup>1</sup>H NMR (400 MHz, CDCl<sub>3</sub>): δ 7.60 (2H, d, *J* = 8.0 Hz), 7.39 (2H, d, *J* = 8.8 Hz), 6.04 (1H, ddd, *J* = 16.8, 10.4, 8.8 Hz), 5.19–5.12 (2H, m), 4.14–4.07 (1H, m), 3.34 (1H, t, *J* = 8.0 Hz), 1.42 (1H, br), 1.24 (3H, d, *J* = 6.0 Hz); <sup>13</sup>C NMR (100 MHz, CDCl<sub>3</sub>): δ 145.3, 137.8, 129.1 (q, *J*<sub>CF</sub> = 31.9 Hz), 129.0, 125.7 (q, *J*<sub>CF</sub> = 3.8 Hz), 124.3 (q, *J*<sub>CF</sub> = 270.2 Hz), 117.8, 70.5, 58.6, 21.2; HRMS (DART): Calcd for C<sub>12</sub>H<sub>12</sub>F<sub>3</sub> [M+H-H<sub>2</sub>O]<sup>+</sup>: 213.0891; Found: 213.0900; Specific rotation: [α]<sub>D</sub><sup>20</sup> -50.53 (c 1.67, CHCl<sub>3</sub>) for a >98% S<sub>N</sub>2', 95:5 d.r., and 96:4 e.r. sample. Enantiomeric purity of **2k** was determined by HPLC analysis in comparison with authentic racemic material (96:4 e.r. shown; chiralcel AD-H column, 99:1 hexanes:*i*PrOH, 0.3 mL/min, 220 nm).

## Enantiomeric purity of the major diastereomers

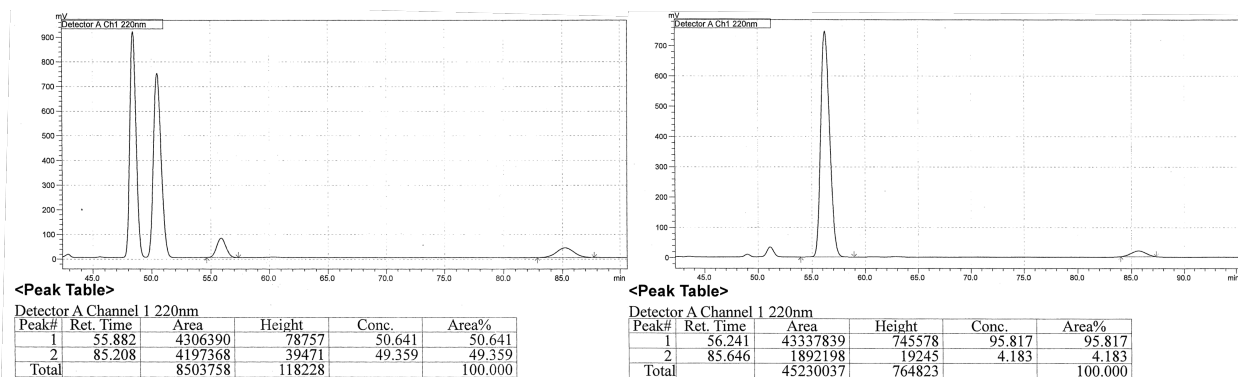

## Enantiomeric purity of the minor diastereomers

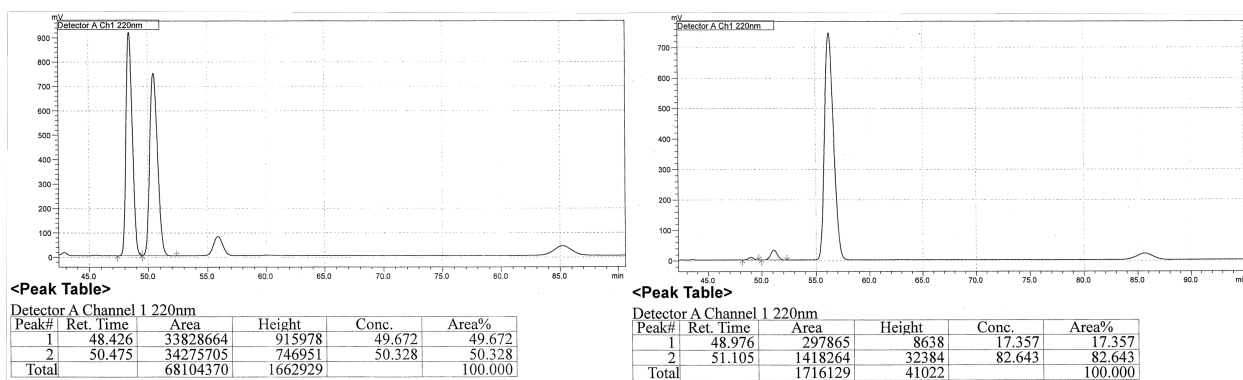

| Peak # | Retention time | Area     | Area % | Peak # | Retention time | Area     | Area % |
|--------|----------------|----------|--------|--------|----------------|----------|--------|
| 1      | 55.882         | 4306390  | 50.641 | 1      | 56.241         | 43337839 | 95.817 |
| 2      | 85.208         | 4197368  | 49.359 | 2      | 85.646         | 1892198  | 4.183  |
| 1      | 48.426         | 33828664 | 49.672 | 1      | 48.976         | 297865   | 17.357 |
| 2      | 50.275         | 34275705 | 50.328 | 2      | 51.105         | 1418264  | 82.643 |

**(2*S*,3*R*)-3-(4-Nitrophenyl)pent-4-en-2-ol (2I):** IR (CH<sub>2</sub>Cl<sub>2</sub>): 3431 (br s), 2924 (w), 1638 (m), 1517 (s), 1457 (w), 1343 (s), 1108 (s), 1055 (s), 922 (m), 846 (m), 661 (m), 522 (m), 402 (m) cm<sup>-1</sup>; <sup>1</sup>H NMR (400 MHz, CDCl<sub>3</sub>): δ 8.20 (2H, d, *J* = 8.8 Hz), 7.45 (2H, d, *J* = 8.8 Hz), 6.03 (1H, ddd, *J* = 16.8, 10.8, 8.8 Hz), 5.23–5.12 (2H, m), 4.14 (1H, pent, *J* = 6.0 Hz), 3.40 (1H, t, *J* = 8.0 Hz), 1.23 (1H, br), 1.24 (3H, d, *J* = 6.0 Hz); <sup>13</sup>C NMR (100 MHz, CDCl<sub>3</sub>): δ 149.0, 147.0, 137.3, 129.6, 123.9, 118.3, 70.5, 58.4, 21.4; HRMS (DART): Calcd for C<sub>11</sub>H<sub>14</sub>NO<sub>3</sub> [M+H]<sup>+</sup>: 208.0974; Found: 208.0973; Specific rotation: [α]<sub>D</sub><sup>20</sup> -48.57 (*c* 1.97, CHCl<sub>3</sub>) for a >98% S<sub>N</sub>2', 93:7 d.r., and 95:5 e.r. sample. Enantiomeric purity of **2I** was determined by HPLC analysis in comparison with authentic racemic material (95:5 e.r. shown; chiralcel AD-H column, 98:2 hexanes:*i*PrOH, 0.3 mL/min, 220 nm).

## Enantiomeric purity of the major diastereomers

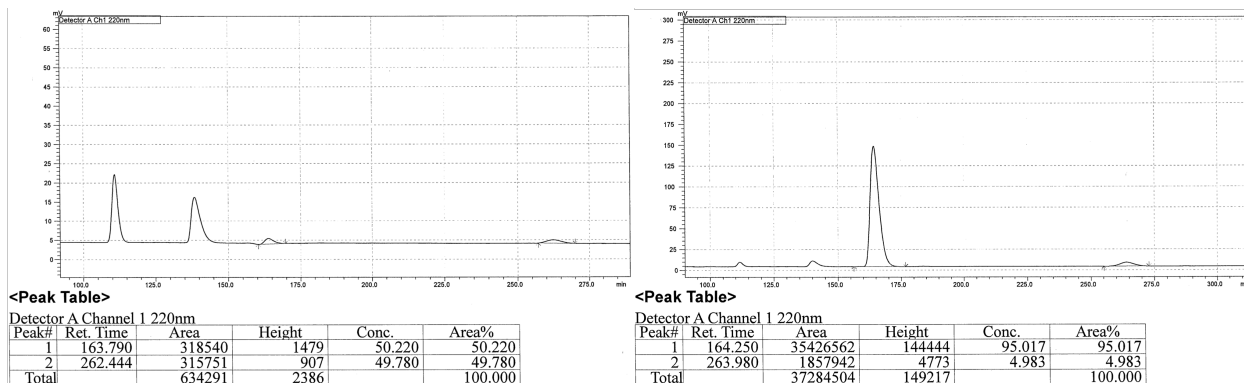

## Enantiomeric purity of the minor diastereomers

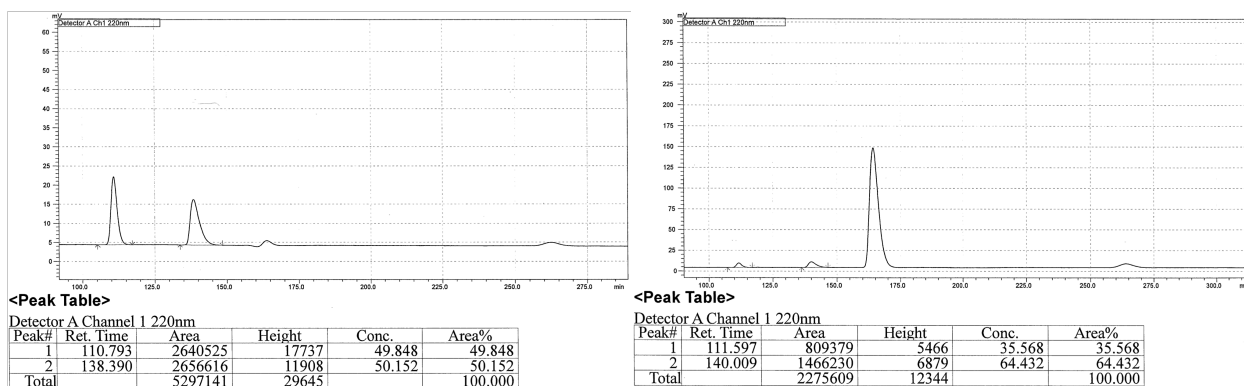

| Peak # | Retention time | Area    | Area % | Peak # | Retention time | Area     | Area % |
|--------|----------------|---------|--------|--------|----------------|----------|--------|
| 1      | 163.790        | 318540  | 50.220 | 1      | 164.250        | 35426562 | 95.017 |
| 2      | 262.444        | 315751  | 49.780 | 2      | 263.980        | 1857942  | 4.983  |
| 1      | 110.793        | 2640525 | 49.848 | 1      | 111.597        | 809379   | 35.568 |
| 2      | 138.390        | 2656616 | 50.152 | 2      | 140.009        | 1466230  | 64.432 |

**(2*S*,3*R*)-3-(Pyridin-3-yl)pent-4-en-2-ol (4):** Following the representative procedure except 7.5 mol % **imid-3** and 7.0 mol % CuCl were used. IR (CH<sub>2</sub>Cl<sub>2</sub>): 3232 (br s), 2923 (m), 1577 (w), 1427 (m), 1373 (m), 1312 (w), 1119 (s), 1029 (m), 918 (s), 802 (m), 714 (s), 402 (m) cm<sup>-1</sup>; <sup>1</sup>H NMR (400 MHz, CDCl<sub>3</sub>): δ 8.51–8.48 (2H, m), 7.61 (1H, dt, *J* = 7.6, 2.0 Hz), 7.28–7.25 (2H, m), 6.06 (1H, ddd, *J* = 16.8, 10.4, 8.4 Hz), 5.21–5.12 (2H, m), 4.11 (1H, pent, *J* = 6.8 Hz), 3.30 (1H, t, *J* = 7.6 Hz), 1.63 (1H, br), 1.22 (3H, d, *J* = 6.0 Hz); <sup>13</sup>C NMR (100 MHz, CDCl<sub>3</sub>): δ 150.4, 148.4, 137.7, 136.5, 136.2, 123.6, 118.0, 70.4, 55.8, 21.3; HRMS (DART): Calcd for C<sub>10</sub>H<sub>14</sub>NO [M+H]<sup>+</sup>: 164.1075; Found: 164.1073; Specific rotation: [α]<sub>D</sub><sup>20</sup> –43.32 (*c* 0.42, CHCl<sub>3</sub>) for a 96% S<sub>N</sub>2', 92:8 d.r., and 93:7 e.r. sample. Enantiomeric purity of **4** was determined by HPLC analysis in comparison with authentic racemic material (93:7 e.r. shown; chiralcel OZ–H column, 97:3 hexanes:*i*PrOH, 0.3 mL/min, 254 nm).

## Enantiomeric purity of the major diastereomers

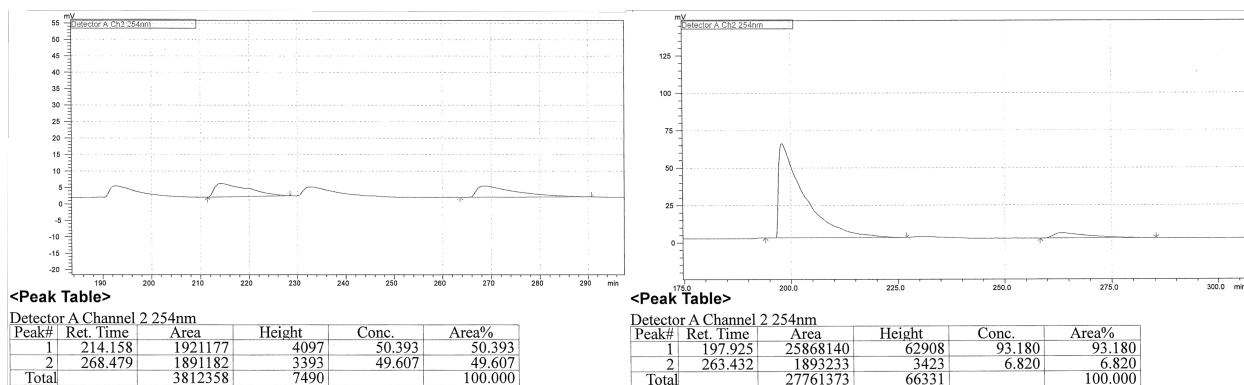

| Peak # | Retention time | Area    | Area % | Peak # | Retention time | Area     | Area % |
|--------|----------------|---------|--------|--------|----------------|----------|--------|
| 1      | 214.158        | 1921177 | 50.393 | 1      | 197.925        | 25868140 | 93.180 |
| 2      | 268.479        | 1891182 | 49.607 | 2      | 263.432        | 1893233  | 6.820  |

**(2*S*,3*R*)-3-(Benzo[*b*]thiophen-3-yl)pent-4-en-2-ol (5)**: IR (CH<sub>2</sub>Cl<sub>2</sub>): 3429 (br s), 2974 (w), 1637 (w), 1426 (m), 1392 (w), 1116 (m), 1063 (m), 871 (m), 760 (s), 599 (w), 425 (m) cm<sup>-1</sup>; <sup>1</sup>H NMR (400 MHz, CDCl<sub>3</sub>): δ 7.89–7.87 (1H, m), 7.82 (1H, dd, *J* = 6.4, 1.2 Hz), 7.14–7.34 (2H, m), 7.33 (1H, s), 7.26 (1H, s), 6.15–6.06 (1H, m), 5.21–5.17 (2H, m), 4.26 (1H, pent, *J* = 6.4 Hz), 3.81 (1H, t, *J* = 7.6 Hz), 1.71 (1H, br), 1.28 (3H, d, *J* = 6.0 Hz); <sup>13</sup>C NMR (100 MHz, CDCl<sub>3</sub>): δ 140.7, 138.9, 137.2, 135.3, 124.6, 124.2, 123.1, 122.7, 122.2, 117.7, 70.0, 52.0, 20.9; HRMS (DART): Calcd for C<sub>13</sub>H<sub>13</sub>S [M+H–H<sub>2</sub>O]<sup>+</sup>: 201.0738; Found: 201.0738; Specific rotation: [α]<sub>D</sub><sup>20</sup> –20.61 (*c* 1.82, CHCl<sub>3</sub>) for a >98% S<sub>N</sub>2', 91:9 d.r., and 95:5 e.r. sample. Enantiomeric purity of **5** was determined by HPLC analysis in comparison with authentic racemic material (95:5 e.r. shown; chiralcel AD–H column, 99:1 hexanes: *i*PrOH, 0.3 mL/min, 220 nm).

## Enantiomeric purity of the major diastereomers

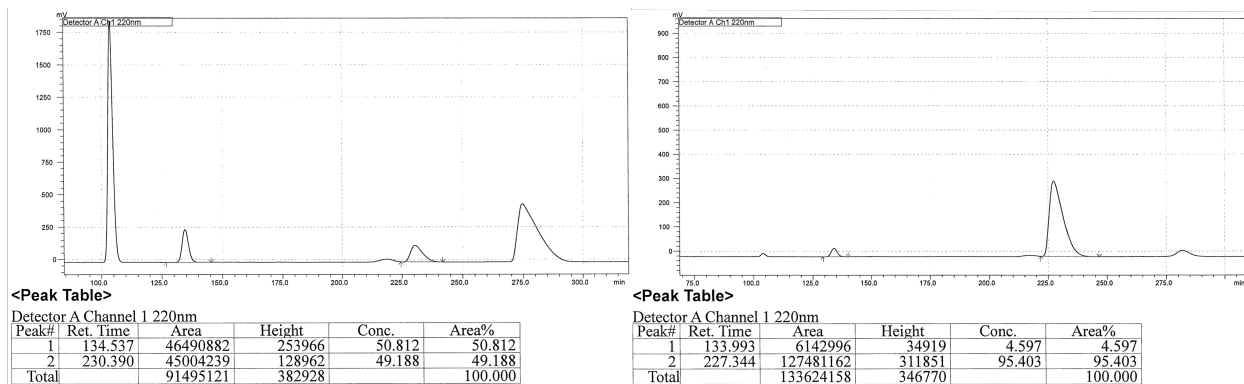

## Enantiomeric purity of the minor diastereomers

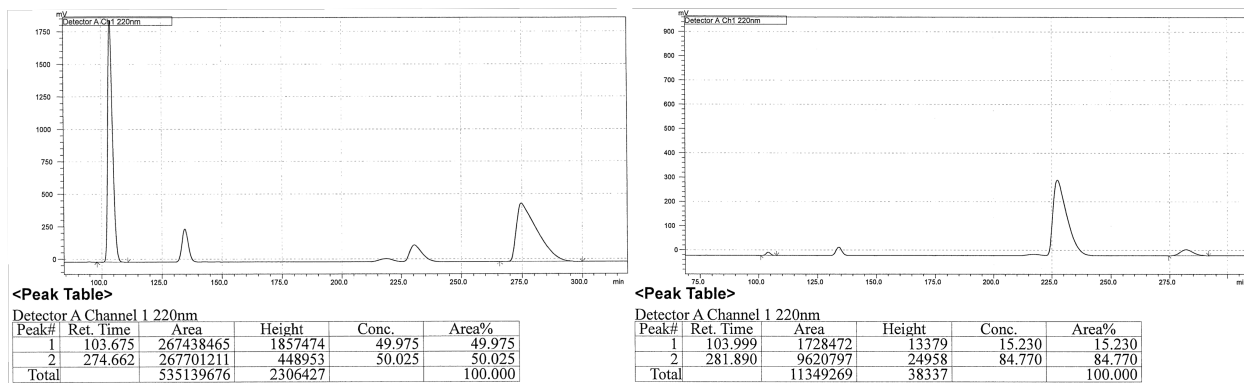

| Peak # | Retention time | Area      | Area % | Peak # | Retention time | Area      | Area % |
|--------|----------------|-----------|--------|--------|----------------|-----------|--------|
| 1      | 134.537        | 46490882  | 50.812 | 1      | 133.993        | 6142996   | 4.597  |
| 2      | 230.390        | 45004239  | 49.188 | 2      | 227.344        | 127481162 | 95.403 |
| 1      | 103.675        | 267438465 | 49.975 | 1      | 103.999        | 1728472   | 15.230 |
| 2      | 274.662        | 267701211 | 50.025 | 2      | 281.890        | 9620797   | 84.770 |

**(2*S*,3*R*,*E*)-5-Phenyl-3-vinylpent-4-en-2-ol (6)**: Following the representative procedure except 7.5 mol % **imid-3** and 7.0 mol % CuCl were used. IR (CH<sub>2</sub>Cl<sub>2</sub>): 3377 (br s), 2972 (w), 1636 (w), 1599 (w), 1449 (m), 1373 (w), 1119 (s), 1072 (s), 996 (s), 915 (s), 865 (m), 607 (m), 517 (m) cm<sup>-1</sup>; <sup>1</sup>H NMR (500 MHz, CDCl<sub>3</sub>): δ 7.40–7.37 (2H, m), 7.32 (2H, t, *J* = 7.0 Hz), 7.23 (1H, t, *J* = 7.0 Hz), 6.50 (1H, d, *J* = 16.0 Hz), 6.21 (1H, dd, *J* = 16.0, 8.5 Hz), 5.88 (1H, ddd, *J* = 17.5, 10.5, 8.0 Hz), 5.20–5.17 (2H, m), 3.83 (1H, pent, *J* = 6.0 Hz), 2.91 (1H, q, *J* = 8.0 Hz), 1.73 (1H, br), 1.23 (3H, d, *J* = 6.0 Hz); <sup>13</sup>C NMR (100 MHz, CDCl<sub>3</sub>): δ 137.6, 137.2, 133.0, 128.7, 128.5, 127.6, 126.4, 117.3, 69.9, 55.8, 20.5; HRMS (DART): Calcd for C<sub>13</sub>H<sub>15</sub> [M+H–H<sub>2</sub>O]<sup>+</sup>: 171.1174; Found: 171.1183; Specific rotation: [α]<sub>D</sub><sup>20</sup> –60.33 (*c* 1.15, CHCl<sub>3</sub>) for a >98:2 S<sub>N</sub>2', 90:10 d.r., and 92:8 e.r. sample. Enantiomeric purity of **6** was determined by HPLC analysis in comparison with authentic racemic material (92:8 e.r. shown; chiralcel OD–H column, 99:1 hexanes:*i*PrOH, 0.3 mL/min, 254 nm).

## Enantiomeric purity of the major diastereomers

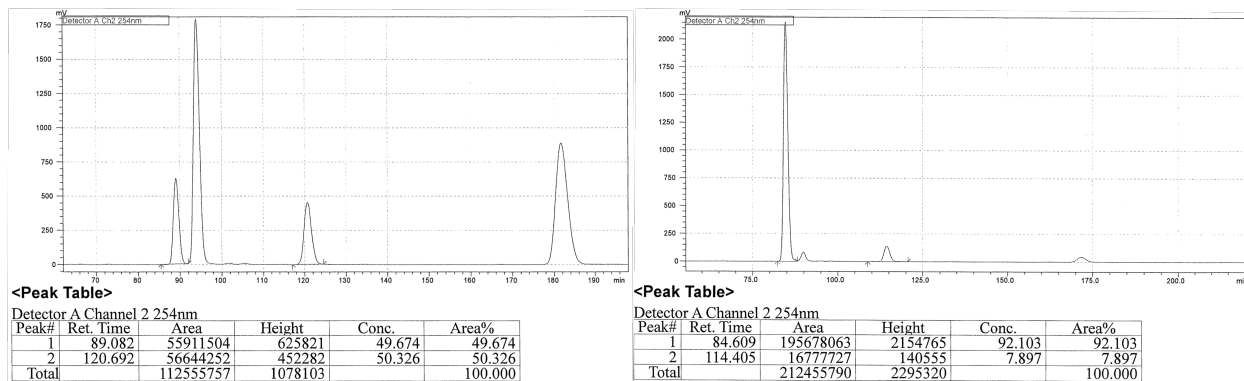

## Enantiomeric purity of the minor diastereomers

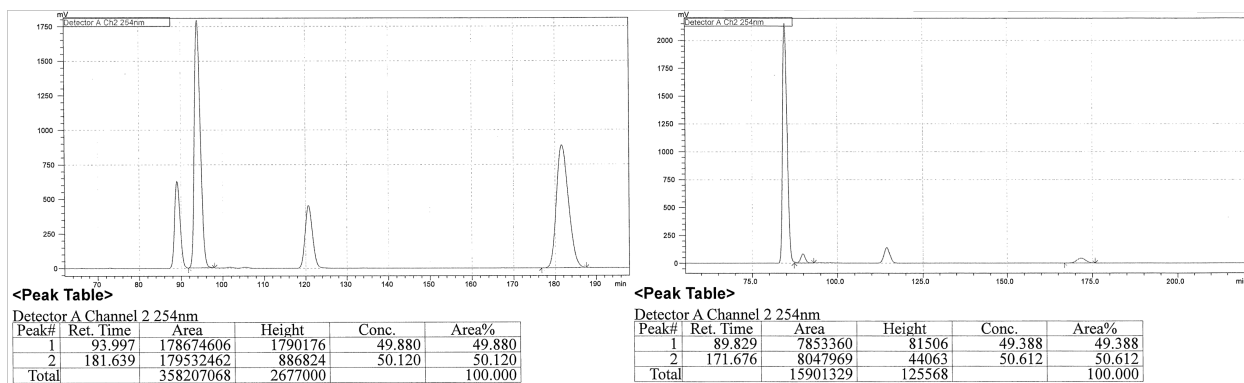

| Peak # | Retention time | Area      | Area % | Peak # | Retention time | Area      | Area % |
|--------|----------------|-----------|--------|--------|----------------|-----------|--------|
| 1      | 89.082         | 55911504  | 49.674 | 1      | 84.609         | 195678063 | 92.103 |
| 2      | 120.692        | 56644252  | 50.326 | 2      | 114.405        | 16777727  | 7.897  |
| 1      | 93.997         | 178674606 | 49.880 | 1      | 89.829         | 7853360   | 49.388 |
| 2      | 181.639        | 179532462 | 50.120 | 2      | 171.676        | 8047969   | 50.612 |

**(2*S*,3*R*)-3-(Phenylethynyl)pent-4-en-2-ol (7):** IR (CH<sub>2</sub>Cl<sub>2</sub>): 3399 (br s), 2975 (w), 1639 (w), 1598 (w), 1490 (m), 1443 (m), 1115 (s), 1070 (s), 921 (s), 825 (m), 597 (m), 469 (m) cm<sup>-1</sup>; <sup>1</sup>H NMR (400 MHz, CDCl<sub>3</sub>): δ 7.47–7.43 (2H, m), 7.33–7.30 (3H, m), 5.91 (1H, ddd, *J* = 20.8, 10, 6.4 Hz), 5.43–5.47 (1H, m), 5.31–5.28 (1H, m), 3.93–3.88 (1H, m), 3.38–3.35 (1H, m), 1.99 (1H, d, *J* = 2.0 Hz), 1.34 (3H, d, *J* = 6.0 Hz); <sup>13</sup>C NMR (100 MHz, CDCl<sub>3</sub>): δ 134.5, 131.9, 128.4, 128.3, 123.2, 118.2, 86.7, 86.2, 69.9, 45.4, 20.7; HRMS (DART): Calcd for C<sub>11</sub>H<sub>15</sub>O [M+H]<sup>+</sup>: 187.1123; Found: 187.1131; Specific rotation: [α]<sub>D</sub><sup>20</sup> –82.21 (*c* 0.85, CHCl<sub>3</sub>) for a >98% S<sub>N</sub>2<sup>+</sup>, 93:7 d.r., and 91:9 e.r. sample. Enantiomeric purity of **7** was determined by HPLC analysis in comparison with authentic racemic material (97:3 e.r. shown; chiralcel AZ–H column, 99:1 hexanes:*i*PrOH, 0.3 mL/min, 254 nm).

## Enantiomeric purity of the major diastereomers

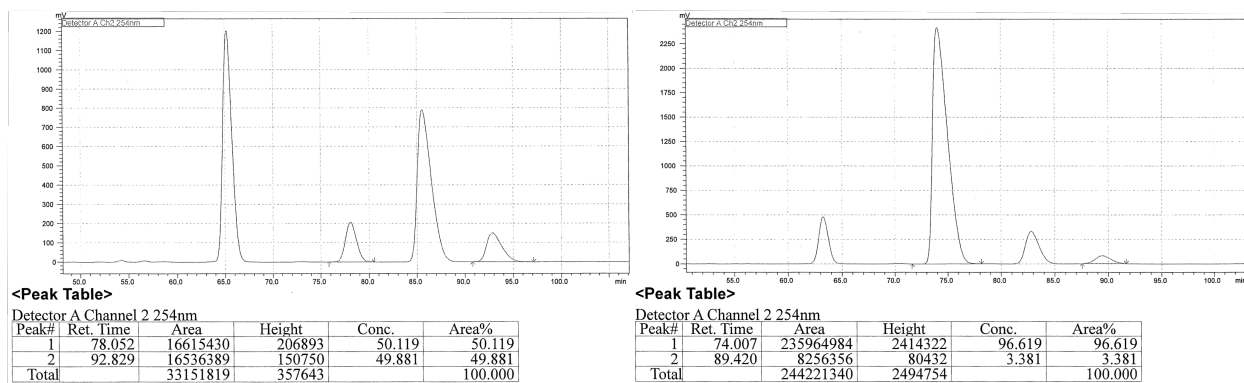

## Enantiomeric purity of the minor diastereomers

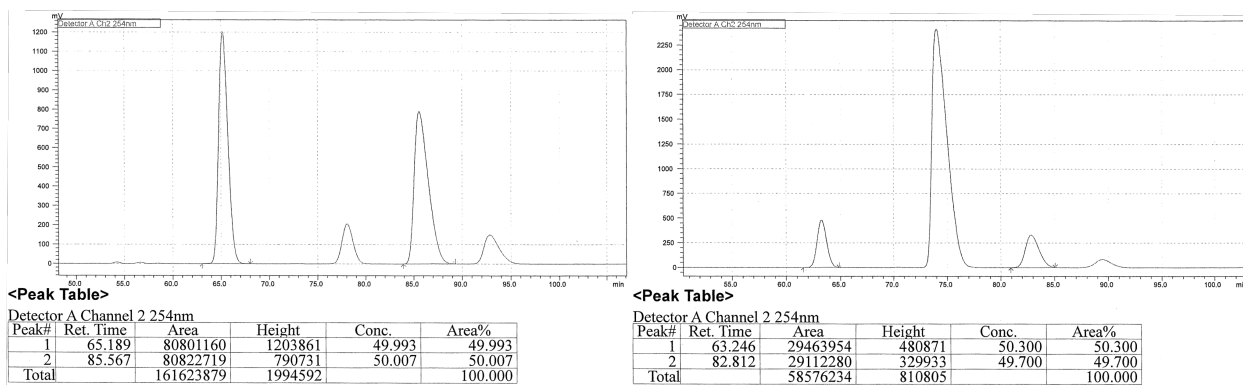

| Peak # | Retention time | Area     | Area % | Peak # | Retention time | Area      | Area % |
|--------|----------------|----------|--------|--------|----------------|-----------|--------|
| 1      | 78.052         | 16615430 | 50.119 | 1      | 74.007         | 235964984 | 96.619 |
| 2      | 92.829         | 16536389 | 49.881 | 2      | 89.420         | 8256356   | 3.381  |
| 1      | 65.189         | 80801160 | 49.993 | 1      | 63.246         | 480871    | 50.300 |
| 2      | 85.567         | 80822719 | 50.007 | 2      | 82.812         | 329933    | 49.700 |

**(2*S*,3*S*)-3-Phenethylpent-4-en-2-ol (8)**: IR (CH<sub>2</sub>Cl<sub>2</sub>): 3358 (br s), 2923 (w), 1639 (w), 1496 (m), 1374 (w), 1122 (s), 1053 (m), 998 (m), 913 (s), 697 (s), 413 (m) cm<sup>-1</sup>; <sup>1</sup>H NMR (400 MHz, CDCl<sub>3</sub>): δ 7.30–7.27 (2H, m), 7.20–7.16 (3H, m), 5.66 (1H, ddd, *J* = 17.2, 10.4, 9.2 Hz), 5.23 (1H, dd, *J* = 10.0, 2.0 Hz), 5.15 (1H, ddd, *J* = 17.2, 2.0, 0.8 Hz), 3.75–3.67 (1H, m), 2.71 (1H, ddd, *J* = 14.0, 10.0, 4.4 Hz), 2.51 (1H, ddd, *J* = 13.6, 10.0, 7.2 Hz), 2.17–2.10 (1H, m), 1.92–1.84 (1H, m), 1.62–1.52 (1H, m), 1.45 (1H, d, *J* = 7.6 Hz), 1.15 (3H, d, *J* = 6.0 Hz); <sup>13</sup>C NMR (100 MHz, CDCl<sub>3</sub>): δ 142.5, 138.4, 128.6, 128.5, 125.9, 118.4, 70.3, 51.4, 33.7, 32.4, 20.2; HRMS (DART): Calcd for C<sub>13</sub>H<sub>17</sub> [M+H–H<sub>2</sub>O]<sup>+</sup>: 173.1330; Found: 173.1329; Specific rotation: [α]<sub>D</sub><sup>20</sup> –6.29 (*c* 2.50, CHCl<sub>3</sub>) for a >98% S<sub>N</sub>2<sup>†</sup>, 92:8 d.r., and 91:9 e.r. sample. Enantiomeric purity of **8** was determined by HPLC analysis in comparison with authentic racemic material (91:9 e.r. shown; chiralcel AD–H column, 99:1 hexanes:*i*PrOH, 0.3 mL/min, 254 nm).

## Enantiomeric purity of the major diastereomers

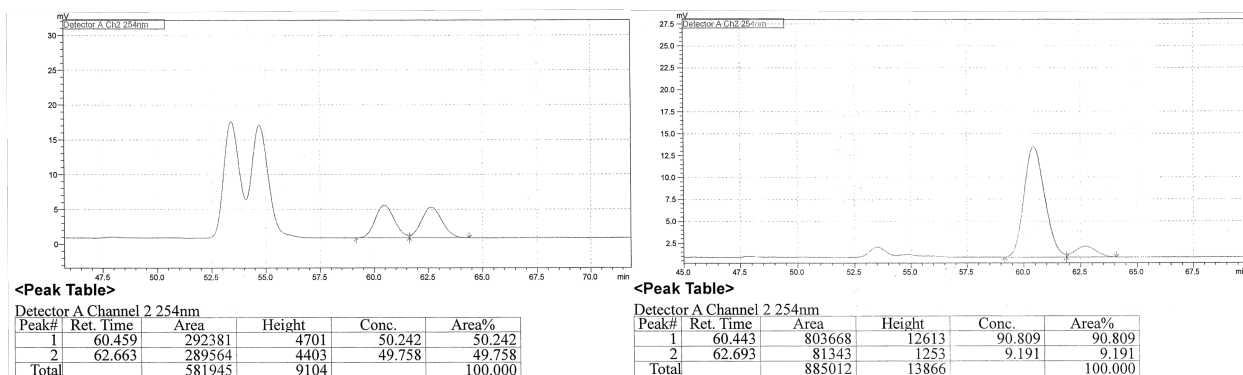

## Enantiomeric purity of the minor diastereomers

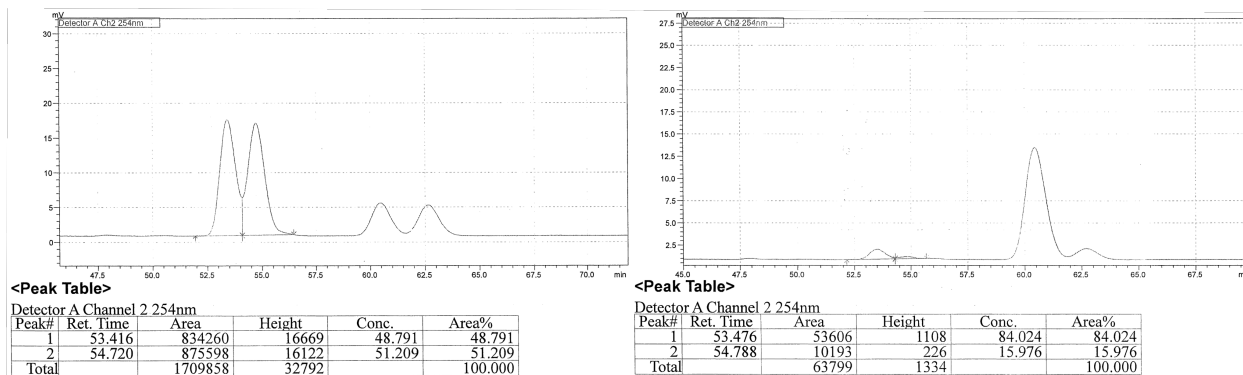

| Peak # | Retention time | Area   | Area % | Peak # | Retention time | Area   | Area % |
|--------|----------------|--------|--------|--------|----------------|--------|--------|
| 1      | 60.459         | 292381 | 50.242 | 1      | 60.443         | 803668 | 90.809 |
| 2      | 62.663         | 289564 | 49.758 | 2      | 62.693         | 81343  | 9.191  |
| 1      | 53.416         | 834260 | 48.791 | 1      | 53.476         | 53606  | 84.024 |
| 2      | 54.720         | 875598 | 51.209 | 2      | 54.788         | 10193  | 15.976 |

**(2*S*,3*R*)-3-Cyclohexylpent-4-en-2-ol (9):** Following the representative procedure except 7.5 mol % **imid-3** and 7.0 mol % CuCl were used. IR (CH<sub>2</sub>Cl<sub>2</sub>): 3377 (br s), 2967 (m), 2922 (s), 2852 (m), 1449 (m), 1420 (w), 1118 (s), 1057 (s), 1001 (m), 956 (w), 910 (s), 872 (w), 838 (w), 768 (s), 507 (w), 407 (m) cm<sup>-1</sup>; <sup>1</sup>H NMR (400 MHz, CDCl<sub>3</sub>): δ 5.56 (1H, dt, *J* = 16.8, 10.0 Hz), 5.17 (1H, dd, *J* = 10.0, 2.4 Hz), 5.06 (1H, dd, *J* = 16.8, 2.0 Hz), 3.92–3.87 (1H, m), 1.94–1.88 (1H, m), 1.74–1.71 (3H, m), 1.66–1.60 (2H, m), 1.50–1.41 (2H, m), 1.31–1.20 (3H, m), 1.10 (3H, d, *J* = 6.0 Hz), 0.99–0.84 (1H, m); <sup>13</sup>C NMR (100 MHz, CDCl<sub>3</sub>): δ 137.1, 118.8, 66.8, 57.9, 37.9m, 31.4, 30.3, 26.7, 26.6, 26.5, 20.0; HRMS (DART): Calcd for C<sub>11</sub>H<sub>19</sub> [M+H–H<sub>2</sub>O]<sup>+</sup>: 151.1487; Found: 151.1491; Specific rotation: [α]<sub>D</sub><sup>20</sup> –9.83 (*c* 0.55, CHCl<sub>3</sub>) for a >98% S<sub>N</sub>2<sup>o</sup>, 93:7 d.r., and 91:9 e.r. sample. Enantiomeric purity of **9** was determined by HPLC analysis of the product from *p*-bromobenzoylation<sup>[13]</sup> in comparison with authentic racemic material (91:9 e.r. shown; chiralcel AD–H column, 99:1 hexanes:*i*PrOH, 0.3 mL/min, 254 nm).

## Enantiomeric purity of the major diastereomers

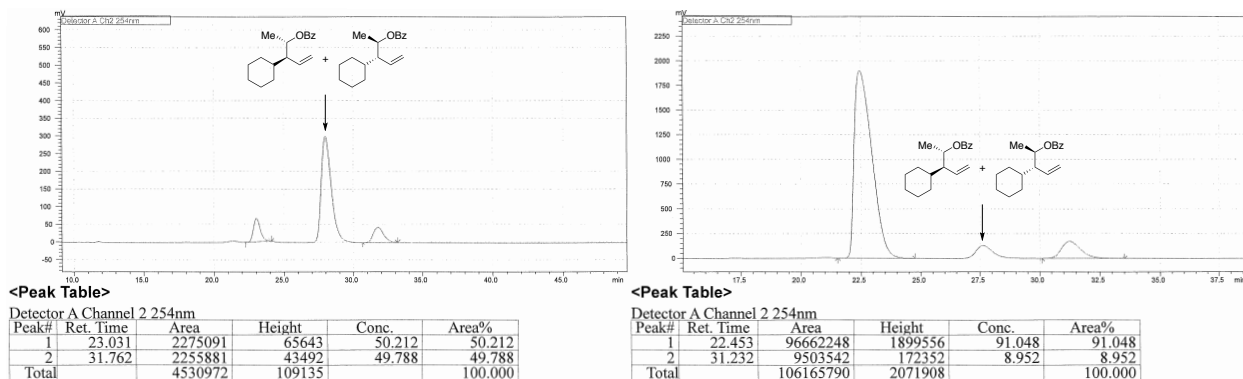

[13] W. Rao, M. J. Koh, P. Kothandaraman, P. W. H. Chan, *J. Am. Chem. Soc.* **2012**, *134*, 10811–10814.



| Peak # | Retention time | Area    | Area % | Peak # | Retention time | Area     | Area % |
|--------|----------------|---------|--------|--------|----------------|----------|--------|
| 1      | 23.031         | 2275091 | 50.212 | 1      | 22.453         | 96662248 | 91.048 |
| 2      | 31.762         | 2255881 | 49.788 | 2      | 31.232         | 9503542  | 8.952  |

### ■ Gram Scale Reaction with (*E*)-But-2-en-1-yl diethyl phosphate

**(2*S*,3*S*)-3-methylpent-4-en-2-ol (10):** In a N<sub>2</sub>-filled glove box, a flame-dried 100 mL round-bottom flask equipped with a stir bar was charged with CuCl (9.9 mg, 0.10 mmol), imidazolium ligand (107.4 mg, 0.125 mmol), and LiOtBu (600 mg, 7.50 mmol). The flask was sealed with a septum and electrical tape before removal from the glove box. Freshly distilled thf (10 mL) was added and the resulting solution was allowed to stir for 1 h under N<sub>2</sub> at 22 °C. A solution of PMHS (902.3 mg, 15.0 mmol) in thf (5 mL) was added to the mixture at 0 °C, causing the solution to turn yellow brown immediately. After 1 min, a solution of vinyl boronic acid pinacol ester (847mg, 5.50 mmol) and (*E*)-but-2-en-1-yl diethyl phosphate (1041 mg, 5.0 mmol) in thf (10 mL) was added by syringe. The resulting mixture was allowed to stir at 22 °C for 14 h after which the mixture was passed through a short plug of silica gel (4x4 cm, 1% of triethylamine) and eluted with Et<sub>2</sub>O. Removal of the volatiles *in vacuo* afforded bright yellow oil. To the oil was added thf (10 mL), pH 7.0 buffer solution (10 mL), and NaBO<sub>3</sub>·4H<sub>2</sub>O (3846 mg, 25.0 mmol) at 0 °C. After complete addition, the mixture was allowed to stir at 22 °C for 3 h. The mixture was washed with Et<sub>2</sub>O (3 x 10 mL), and the combined organic layers were dried over MgSO<sub>4</sub>. Carefully concentrated (product is volatile) mixture was purified by silica gel chromatography (hexanes:Et<sub>2</sub>O = 10:5, R<sub>f</sub> = 0.2) to afford the desired product as clear oil (275 mg, 2.746 mmol, 55% yield). Spectroscopic data match those reported previously.<sup>14</sup> <sup>1</sup>H NMR (400 MHz, CDCl<sub>3</sub>): δ 5.83–5.74 (1H, m), 5.12–5.07 (2H, m), 3.73–3.64 (1H, m), 2.27–2.20 (1H, m), 1.50 (1H, br), 1.15 (3H, d, *J* = 6.4 Hz), 1.03 (3H, d, *J* = 6.8 Hz); Specific rotation: [α]<sub>D</sub><sup>20</sup> –19.05 (c 4.43, CHCl<sub>3</sub>) for a >98% S<sub>N</sub>2', 92:8 d.r., and 93:7 e.r. sample. Based on reported optical rotation values [α]<sub>D</sub> –35.2 (c 1.6, CHCl<sub>3</sub>)<sup>[14]</sup> and [α]<sub>D</sub> –19.56 (neat),<sup>[15]</sup> the absolute stereochemistry of the major enantiomer is assigned to be (2*S*,3*S*). The diastereoselectivity was determined by <sup>1</sup>H NMR spectra after *p*-methoxybenzylation of the alcohol.<sup>[16]</sup> <sup>1</sup>H NMR (400 MHz, CDCl<sub>3</sub>): δ 7.27 (2H, d, *J* = 8.8 Hz), 6.87 (2H, d, *J* = 8.0 Hz), 5.82 (1H, ddd, *J* = 17.2, 10.0, 7.2 Hz), 5.05 (1H, d, *J* = 11.6 Hz), 5.01 (1H, d, *J* = 4.8 Hz), 4.52 (1H, d, *J* = 11.6 Hz), 4.40 (1H, d, *J* = 11.6 Hz), 3.80 (3H, s), 3.35 (1H, pent, *J* = 6.4 Hz), 2.41–2.33 (1H, m), 1.12 (3H, d, *J* = 6.4 Hz), 1.04 (3H, d, *J* = 7.2 Hz). Enantiomeric purity of **10** was determined by HPLC analysis of the corresponding *p*-methoxybenzyl ether<sup>[16]</sup> in comparison with authentic racemic material (93:7

[14] R. Tannert, L.-G. Milroy, B. Ellinger, T.-S. Hu, H.-D. Arndt, H. Waldmann, *J. Am. Chem. Soc.* **2010**, *132*, 3063–3077.

[15] H. C. Brown, K. S. Bhat, *J. Am. Chem. Soc.* **1986**, *108*, 293–294.

[16] U. Eggert, R. Diestel, F. Sasse, R. Jansen, B. Kunze, M. Kalesse, *Angew. Chem. Int. Ed.* **2008**, *47*, 6478–6482.

e.r. shown; chiralcel OJ–H column, 99:1 hexanes:*i*PrOH, 0.3 mL/min, 220 nm).

### Enantiomeric purity of the major isomers

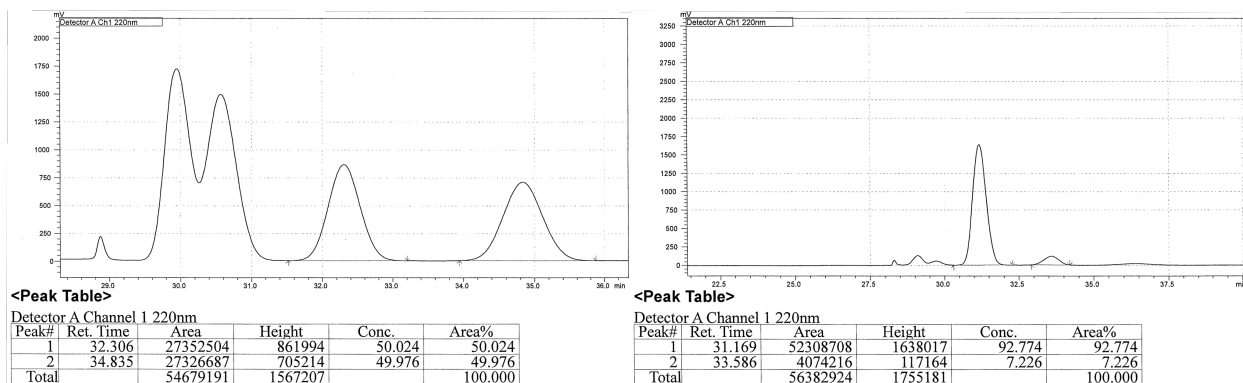

### Enantiomeric purity of the minor isomers

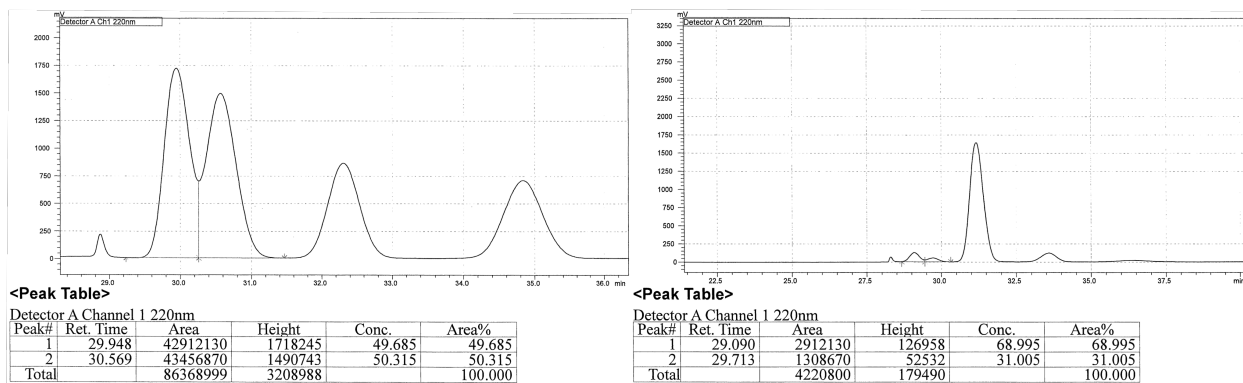

| Peak # | Retention time | Area     | Area % | Peak # | Retention time | Area     | Area % |
|--------|----------------|----------|--------|--------|----------------|----------|--------|
| 1      | 32.306         | 27352504 | 50.024 | 1      | 31.169         | 52308798 | 92.774 |
| 2      | 34.835         | 27326687 | 49.976 | 2      | 33.586         | 4074216  | 7.226  |
| 1      | 29.948         | 42912130 | 49.685 | 1      | 29.090         | 2912130  | 68.995 |
| 2      | 30.569         | 43456870 | 50.315 | 2      | 29.713         | 1308670  | 31.005 |

### ■ C–B(pin) to C–furyl Conversion

**2-((2*S*,3*S*)-3-Phenethylpent-4-en-2-yl)furan (12):** The secondary boron compound (0.35 mmol, precursor to alcohol **8**) was converted to **12** by a reported procedure<sup>[17]</sup> except 1.5 equiv. furan, 1.5 equiv. *n*-BuLi, and 1.5 equiv. NBS were used. IR (neat): 3026 (w), 2933 (w), 1640 (w), 1496 (m), 1454 (m), 1148 (m), 1117 (w), 1030 (s), 914 (s), 793 (m), 598 (m), 497 (m) cm<sup>-1</sup>; <sup>1</sup>H NMR (400, MHz CDCl<sub>3</sub>): δ 7.30–7.23 (3H, m), 7.18–7.16 (1H, m), 7.11 (2H, d, *J* = 7.6 Hz), 6.27 (1H, dd, *J* = 3.2, 2.0 Hz), 5.95 (1H, d, *J* = 2.8 Hz), 5.60 (1H, ddd, *J* = 16.8, 10.0, 9.2 Hz), 5.10 (1H, dd, *J* = 10.4, 2.0 Hz), 5.02–4.97 (2H, m), 2.81 (1H, pent, *J* = 6.8 Hz), 2.66 (1H, ddd, *J* = 13.6, 10.8, 5.2 Hz), 2.44 (1H, ddd, *J* = 14.0, 10.0, 6.4 Hz), 1.71–1.62 (1H, m), 1.51–1.44 (1H, m), 1.19 (3H, d, *J* = 6.8 Hz); <sup>13</sup>C NMR (100 MHz, CDCl<sub>3</sub>): δ 159.3, 142.7, 140.7, 140.4, 128.5, 128.4, 125.7, 116.6, 110.0, 104.9, 48.7, 37.6, 34.1, 33.8, 16.4; HRMS [M+H]<sup>+</sup> Found for C<sub>17</sub>H<sub>21</sub>O:

[17] A. Bonet, M. Odachowski, D. Leonori, S. Essafi, V. K. Aggarwal, *Nature Chem.* **2014**, *6*, 584–589.

241.1601; Specific rotation:  $[\alpha]_D^{20} -2.31$  (*c* 6.67, CHCl<sub>3</sub>).

### ■ Assignment of Absolute Configuration of the Major Isomer from imid-2

The absolute configuration of the major isomer from **imid-2** was assigned by comparing the optical rotation of corresponding aldehyde **2ab** after homologation and oxidations.

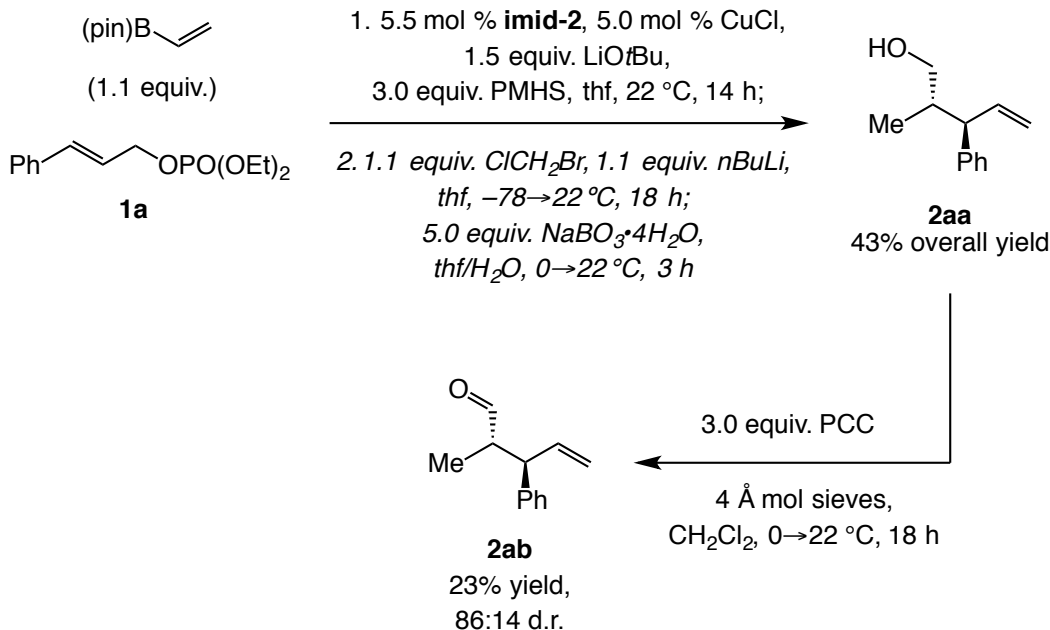

**2-Methyl-3-phenylpent-4-en-1-ol (2aa)**: The secondary boron compound was prepared from the representative procedure except **imid-2** was used (0.3 mmol scale). After purification, the sample was homologated by the reported procedure<sup>[18]</sup> and oxidized to give the final product (43% overall yield after flash column chromatography). <sup>1</sup>H NMR data match those reported previously.<sup>[19]</sup> <sup>1</sup>H NMR (400, MHz CDCl<sub>3</sub>): δ 7.32–7.17 (5H, m), 6.11–6.01 (1H, m), 5.14–5.04 (2H, m), 3.71–3.67 (1H, m), 3.60–3.56 (1H, m), 3.17 (1H, t, *J* = 9.6 Hz), 2.08–2.01 (1H, m), 1.51 (1H, br), 0.80 (3H, dd, *J* = 7.2, 1.2 Hz).

**(2*S*,3*R*)-2-Methyl-3-phenylpent-4-enal (2ab)**: Prepared from **S2** according to the reported procedure.<sup>[20]</sup> Spectroscopic data match those reported previously.<sup>[21]</sup> <sup>1</sup>H NMR (400, MHz CDCl<sub>3</sub>): δ 9.71–9.69 (1H, m), 7.36–7.18 (5H, m), 6.08–5.98 (1H, m), 5.14–5.09 (2H, m), 3.53 (1H, t, *J* = 9.0 Hz), 2.83–2.75 (1H, m), 0.94–0.92 (3H, m); Specific rotation:  $[\alpha]_D^{20} +22.79$  (*c* 0.63, CHCl<sub>3</sub>) for a >98% S<sub>N</sub>2', 86:14 d.r., and 87:13 e.r. sample. Based on reported optical rotation values  $[\alpha]_D^{26} +57.4$  (*c* 1.0, CHCl<sub>3</sub>)<sup>[21]</sup>, the absolute stereochemistry of the major enantiomer is assigned to be (2*S*,3*R*).

[18] T. Ohmura, H. Furukawa, M. Suginoe, *J. Am. Chem. Soc.* **2006**, *128*, 13366–13367.

[19] a) E. E. Kwan, J. R. Scheerer, D. A. Evans, *J. Org. Chem.* **2013**, *78*, 175–203; b) B. D. Kelly, J. M. Allen, R. E. Tundel, T. H. Lambert, *Org. Lett.* **2009**, *11*, 1381–1383.

[20] C. H. Oh, J. H. Hong, *Bull. Korean Chem. Soc.* **2005**, *26*, 1520–1524.

[21] S. Krautwald, M. A. Schafroth, D. Sarlah, E. M. Carreira, *J. Am. Chem. Soc.* **2014**, *136*, 3020–3023.

## ■ Density Functional Theory (DFT)/ONIOM Calculations

DFT/ONIOM computations<sup>[22]</sup> were performed with the Gaussian 09 suite of programs.<sup>[23]</sup> Geometries were optimized by the following ONIOM<sup>[24]</sup> method: M06L/Def2SVP:UFF (see Scheme S2 for definition of the boundaries; in cases where explicit thf molecules have been used in the simulations, only the oxygen atom has been modeled with the higher level). The effect of a polar reaction medium (tetrahydrofuran, THF) was approximated by means of an integral equation formalism variant of the polarizable continuum model (IEFPCM).<sup>[25]</sup> Stationary points were probed through vibrational analysis and Gibbs free energy corrections were performed under standard conditions (298.15 K, 1.0 atm). Intrinsic reaction coordinate (IRC) calculations have been performed starting from selected transition states (**ts**) employing the L(ocal) Q(uadratic) A(pproximation) method, followed by subsequent optimization to obtain structures and energies for educt (**ed**) and product (**prod**) on either side of the transition state.<sup>[26]</sup> We furthermore probed the performance of various density functionals through single point energy calculations at the geometries optimized at the levels described above by means of the SMD solvation model<sup>[27]</sup> with THF as solvent and the larger Def2TZVPP<sup>[28]</sup> basis set. Since the correct density functional is not known we tested several state of the art approaches that have been

[22] For reviews on the application of DFT calculations to transition metal chemistry, see: a) C. J. Cramer, D. G. Truhlar, *Phys. Chem. Chem. Phys.* **2009**, *11*, 10757–10816; b) S. Grimme, S. Ehrlich, L. Goerigk, *J. Comp. Chem.* **2011**, *32*, 1456–1465; c) R. Peverati, D. G. Truhlar, *Phil. Trans. R. Soc.* **2014**, *A 372*:20120476.

[23] M. J. Frisch, G. W. Trucks, H. B. Schlegel, G. E. Scuseria, M. A. Robb, J. R. Cheeseman, G. Scalmani, V. Barone, B. Mennucci, G. A. Petersson, H. Nakatsuji, M. Caricato, X. Li, H. P. Hratchian, A. F. Izmaylov, J. Bloino, G. Zheng, J. L. Sonnenberg, M. Hada, M. Ehara, K. Toyota, R. Fukuda, J. Hasegawa, M. Ishida, T. Nakajima, Y. Honda, O. Kitao, H. Nakai, T. Vreven, J. A. Montgomery Jr., J. E. Peralta, F. Ogliaro, M. Bearpark, J. J. Heyd, E. Brothers, K. N. Kudin, V. N. Staroverov, R. Kobayashi, J. Normand, K. Raghavachari, A. Rendell, J. C. Burant, S. S. Iyengar, J. Tomasi, M. Cossi, N. Rega, J. M. Millam, M. Klene, J. E. Knox, J. B. Cross, V. Bakken, C. Adamo, J. Jaramillo, R. Gomperts, R. E. Stratmann, O. Yazyev, A. J. Austin, R. Cammi, C. Pomelli, J. W. Ochterski, R. L. Martin, K. Morokuma, V. G. Zakrzewski, G. A. Voth, P. Salvador, J. J. Dannenberg, S. Dapprich, A. D. Daniels, Ö. Farkas, J. B. Foresman, J. V. Ortiz, J. Cioslowski, D. J. Fox, *Gaussian 09, Revision D.01*, Gaussian, Inc., Wallingford CT, **2009**.

[24] L. W. Chung, W. M. C. Sameera, R. Ramozzi, A. J. Page, M. Hatanaka, G. P. Petrova, T. V. Harris, X. Li, Z. Ke, F. Liu, H.-B. Li, L. Ding, K. Morokuma, *Chem. Rev.* **2015**, *115*, 5678–5769.

[25] G. Scalmani, M. J. Frisch, *Chem. Phys.* **2010**, *132*, 114110.

[26] a) M. Page, J. W. McIver Jr., *Phys.* **1988**, *88*, 922–935; b) M. Page, C. Doubleday Jr., J. W. McIver Jr., *J. Chem. Phys.* **1990**, *93*, 5634–5642.

[27] A. V. Marenich, C. J. Cramer, D. G. Truhlar, *J. Phys. Chem. B.* **2009**, *113*, 6378–6396.

[28] F. Weigend, R. Ahlrichs, *Phys. Chem. Chem. Phys.* **2005**, *7*, 3297–3305.

[29] For selected examples highlighting the importance of including treatment of dispersion interactions in modeling olefin metathesis reactions promoted by Ru carbene complexes, see: a) S. Torker, D. Merki, P. Chen, *J. Am. Chem. Soc.* **2008**, *130*, 4808–4814; b) Y. Minenkov, G. Occhipinti, A. Singstad, V. R. Jensen, *Dalton Trans.* **2012**, *41*, 5526–5541; c) Y. Minenkov, G. Occhipinti, V. R. Jensen, *Organometallics* **2013**, *32*, 2099–2111; d) S. Torker, R. K. M. Khan, A. H. Hoveyda, *J. Am. Chem. Soc.* **2014**, *136*, 3439–3455; e) R. K. M. Khan, S. Torker, A. H. Hoveyda, *J. Am. Chem. Soc.* **2014**, *136*, 14337–14340; f) S. Torker, M. J. Koh, R. K. M. Khan, A. H. Hoveyda, *Organometallics*, **2016**, *35*, 543–562; g) M. S. Mikus, S. Torker, A. H. Hoveyda, *Angew. Chem., Int. Ed.* **2016**, *55*, 4997–5002; For modeling allyl addition to CF<sub>3</sub>-ketones, see: h) K.-A. Lee, D. L. Silverio, S. Torker, D. W. Robbins, F. Haeffner, A. H. Hoveyda, *Nature Chem.* **2016**, *8*, 768–777.

developed over the past decade:<sup>[22],[29]</sup>  $\omega$ B97XD,<sup>[30]</sup> M06,<sup>[31]</sup> MN12SX,<sup>[32]</sup> MN12L,<sup>[32]</sup> M06L,<sup>[31]</sup> BP86-D3BJ<sup>[1b],[33]</sup> and PBE0-D3BJ<sup>[1b],[34]</sup> (Figures S1–S9). Electronic and Gibbs free energies for Figures S4–S9 are provided in S53 to S76 and the entries that have been used to construct Figures S1–S3 are highlighted with grey background. A file for convenient viewing of computed geometries with the program Mercury 3.3 is appended as separate “coordinates.xyz” file in S77 to S374.<sup>[35]</sup>

**Scheme S1.** ONIOM boundaries used in the simulations (two layers)

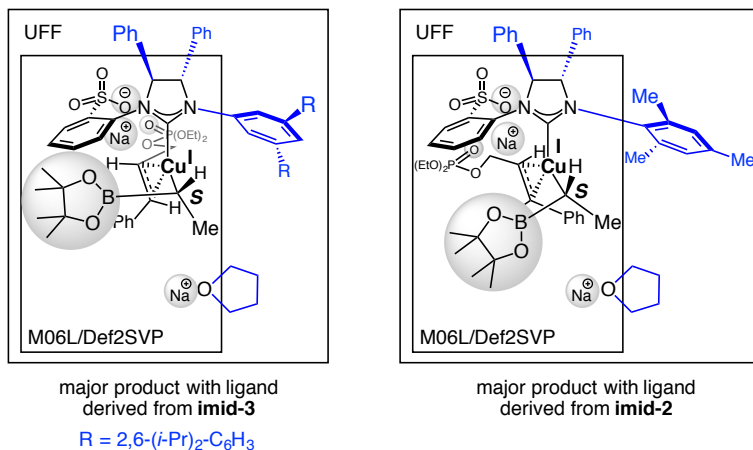

## Nomenclature

The following modes for Cu-H addition with ligands derived from imid-3 and imid-2 have been investigated (Scheme S2). Modes S1 and S2 lead to the *S*-configuration at the carbon center that is directly bound to Cu after Cu-H addition, whereas modes R1 and R2 will generate the carbon stereogenic center with *R*-configuration. In modes S1 and R1 one of the oxygen atoms on the Bpin moiety, which is situated in the rear, is coordinated to the sodium counterion that is bound to the ligand’s sulfonate group. In contrast, the Bpin group is facing towards the front in modes of addition S2 and R2. The modes for Cu-H addition shown in Scheme 2a have further been reinvestigated with either two or three explicit thf molecules bound to the metal center in order to test the stability of the O<sup>Bpin</sup>→Na coordination in presence of a coordinating solvent (tetrahydrofuran). See below for a detailed discussion.

[31] Y. Zhao, D. G. Truhlar, *Acc. Chem. Res.* **2008**, *41*, 157–167.

[32] R. Peverati, D. G. Truhlar, *Phys. Chem. Chem. Phys.* **2013**, *14*, 16187–16191. *B*, **1986**, *33*, 8800–8802.

[34] C. Adamo, V. Barone, *J. Chem. Phys.* **1999**, *110*, 6158–6169.

[35] D. L. Lichtenberger, J. A. Gladysz, *Organometallics*, **2014**, *33*, 835–835. The “coordinates.xyz” file can be generated by copying all the coordinates in S77–S330 into a text file without empty lines and changing the extension to “.xyz”.

**Scheme S2.** Investigated modes of Cu-H addition with ligands derived from **imid-3** (a) and **imid-2** (b)**a** Cu-H addition with **imid-3**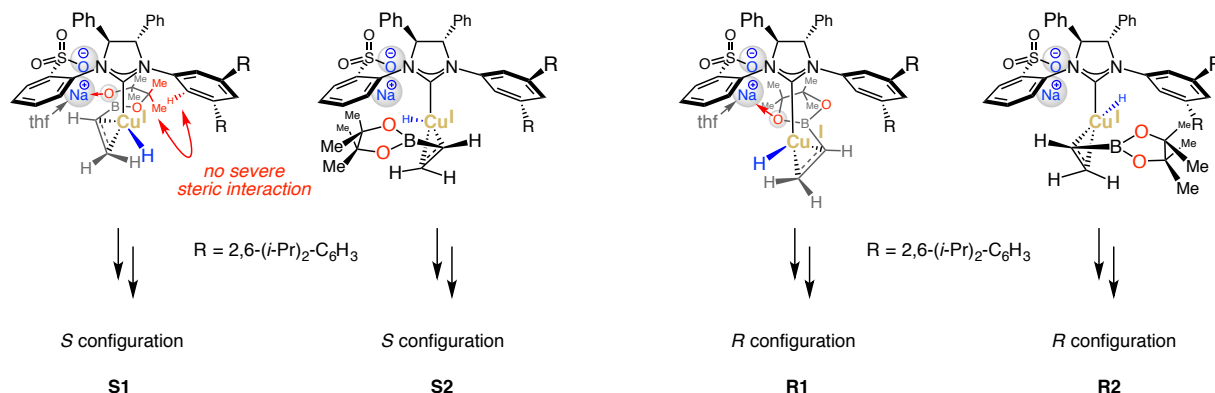**b** Cu-H addition with **imid-2**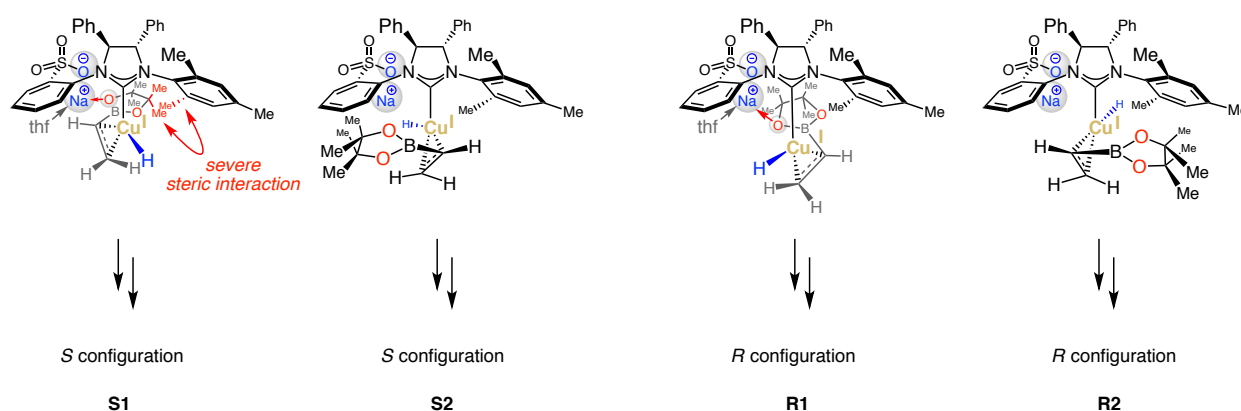

Additionally, all investigated modes for allylic substitution with ligands derived from **imid-3** and **imid-2** are displayed in Scheme 3. Here, **A** and **B** denote the pathways leading to the two enantiomers of the first diastereomer, whereas nomenclature **C** and **D** is used for the two enantiomers of the opposite diastereomer. Mode of allylic substitution **A** leads to the major product when the NHC ligand derived from **imid-3** is involved (Scheme 3a). Furthermore, mode **C** yields the major product when the reaction is performed with **imid-2** and mode **B** leads to the major enantiomer of the minor diastereomer under the same conditions (Scheme 3b).

**Scheme S3.** Investigated modes of allylic substitution (AS) with ligands derived from **imid-3** (a) and **imid-2** (b)

**c** Allylic Substitution with **imid-3**

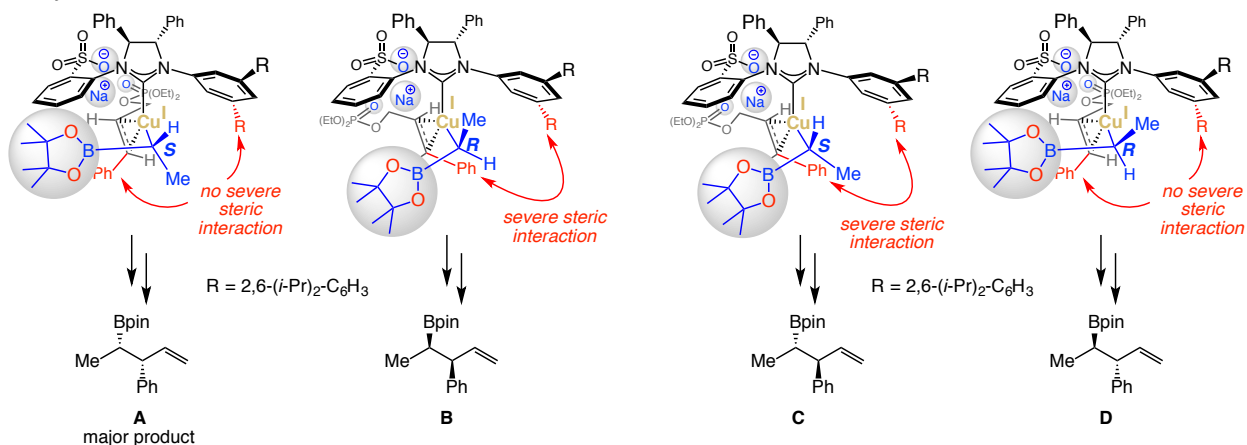

**d** Allylic Substitution with **imid-2**

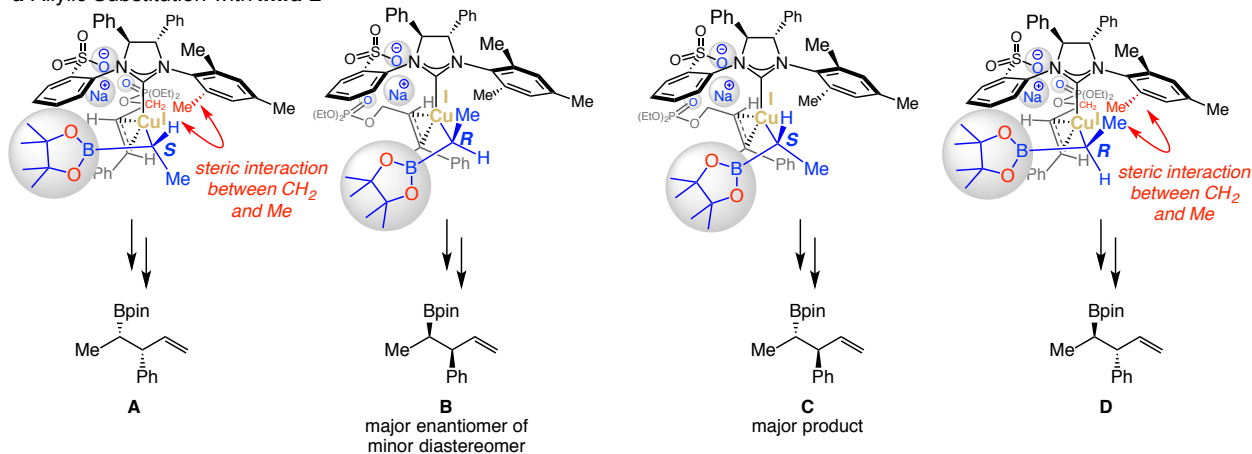

**Stereochemical model with Cu–NHC complex derived from imid-3 (cf. Figure S1-1)**

The pathways leading to the major (**A**) and minor enantiomer (**B**) of the major diastereomer at the MN12SX/Def2TZVPP<sub>THF(SMD)</sub>/M06L/Def2SVP:UFF<sub>THF</sub> level are shown in Figure S1-1. For the corresponding free energy diagrams with other density functional, see Figure S1-2. For a complete picture containing all possible modes for Cu–H addition and allylic substitution (including investigation of several conformers), see Figures S4-1 and S7-1 or Figures S4-2 and S7-2, respectively. As seen in Figure S1-1, mode of Cu–H addition **S1** (9.6 kcal/mol relative to the Cu–H species), wherein a coordination between the Bpin moiety and the Na counterion is established, is significantly more favored compared to the mode of addition **R2**, which leads to the opposite stereochemistry (*R*-configuration) while a O<sup>Bpin</sup>→Na interaction is absent (20.0 kcal/mol). Such a large energy difference (10.4 kcal/mol) should preclude generation of even trace amounts of products that originate from the *R*-configured Cu–alkyl species and suggests that this model system represents a rather simplified version of the true mechanism (see below for further discussion of models with explicit thf molecules). Following Cu–H addition, the major

product (**A**) is generated through the allylic substitution transition state to generate a  $\pi$ -allyl species (with a relative free energy of 6.5 kcal/mol).<sup>[36]</sup> In agreement with the experimental results Cu-H addition is likely irreversible as supported by the lower energy for allylic substitution (6.5 kcal/mol; Figure S1-1) compared to the transition state for Cu-H addition (9.6 kcal/mol; Figure S1-1). Further in agreement with the experimental results are the higher calculated free energies for allylic substitution that lead to minor products **B**, **C** and **D** (8.5–9.1 kcal/mol; cf. Figures S1-1 and S7-1). The herein proposed model for AS with the NHC ligand derived from **imid-3** supports a previous model for nucleophilic addition of propargyl groups to allyl electrophiles, and we refer here to this earlier work for a much more detailed mechanistic discussion.<sup>[37],[38]</sup>

### Stereochemical model with Cu–NHC complex derived from imid-2 (cf. Figure S2-1)

The most critical pathways leading to the major product (**C**) and the major enantiomer of the minor diastereomer (**B**) at the MN12SX/Def2TZVPP<sub>THF(SMD)</sub>//M06L/Def2SVP:UFF<sub>THF</sub> level are shown in Figure S2-1. For the corresponding free energy diagrams with other density functional, see Figure S2-2. For a complete picture containing all possible modes for Cu-H addition and allylic substitution (including investigation of several conformers), see Figures S8-1 and S9-1 or Figures S8-2 and S9-2, respectively. As seen in Figure S2-1, and similar to the reaction promoted by the NHC ligand derived from imid-3, mode of Cu-H addition S1 (8.6 kcal/mol relative to the Cu-H species), wherein the a coordination between the Bpin moiety and the Na counterion is established, is significantly more favored compared to the mode of addition R2, which leads to the opposite stereochemistry (*R*-configuration), while a O<sup>Bpin</sup>→Na interaction is absent (17.9 kcal/mol). Again, such a large energy difference (9.3 kcal/mol) should preclude generation of even trace amounts of products that originate from the *R*-configured Cu-alkyl species, which contradicts the experimental observation that significant amounts of allylic substitution product **B** are isolated. Nonetheless, the energy difference between modes of addition S1 and R2 (9.3 kcal/mol) is slightly smaller than in the case when imid-3 is involved (10.4 kcal/mol). This likely originates from a significant steric interaction between the Bpin moiety and the ortho methyl group on the mesityl group of the NHC (mode S1 in Scheme S2b). Following Cu-H addition, the major product (**C**) is generated through allylic substitution transition state with a relative free energy of 1.5 kcal/mol (Figure S2-1). In agreement with the previous case (cf. Figure S1-1) as well as the experimental results, Cu-H addition is likely irreversible as supported by the lower energy for allylic substitution (1.5 kcal/mol) compared to Cu-H addition (8.6 kcal/mol). Further in agreement with the experimental results are the higher calculated free energies for AS that

[36] For general mechanistic considerations regarding nucleophilic reaction promoted by Cu(I) species, see: N. Yoshikai, E. Nakamura, *Chem. Rev.* **2012**, *112*, 2339–2372.

[37] Y. Shi, B. Jung, S. Torker, A. H. Hoveyda, *J. Am. Chem. Soc.* **2015**, *137*, 8948–8964.

[38] For additional stereochemical models regarding 1,4- or 1,6-additions to enoates or dienates that also suggest the involvement of an intramolecular coordination of the substrate to a metal counterion, see: a) F. Meng, X. Li, S. Torker, Y. Shi, X. Shen, A. H. Hoveyda, *Nature*, **2016**, *537*, 387–393; b) X. Li, F. Meng, S. Torker, Y. Shi, A. H. Hoveyda, *Angew. Chem., Int. Ed.* **2016**, *55*, 9997–10002.



lead to minor products A, B and D (4.4–6.7 kcal/mol; cf. Figures S2-1 and S9-1). The herein proposed model for AS with the NHC ligand derived from imid-2 supports a previous model for nucleophilic addition of vinyl groups to allyl electrophiles, and we refer here to this earlier work for a much more detailed mechanistic discussion.<sup>[37],[38]</sup>

### The effect of a coordinating reaction medium (thf) on the stability of intramolecular chelate interactions (cf. Figure S3-1)

Modeling reactions that involve charged species including counterions, etc. can be quite challenging and the use of solvation models such as PCM or SMD will face certain limitations. For example, relying solely on a continuum model will underestimate the distances between the metal center and the heteroatoms that are included in the simulation. The O<sup>Bpin</sup>→Na distance in mode of addition **S1** without explicit thf molecules is 2.30 Å, whereas the same distance elongates to 2.59 Å when 3 thf molecules are added. Furthermore, one of the largest sources of error relates to the loss entropy that occurs when thf molecules are being bound to the Na counterion. The estimated gas phase corrections to the free energy ( $\Delta G_{\text{corr}} \sim 15$  kcal/mol which corresponds to dilute conditions at 1 atm or 0.05 M) will certainly be significantly overestimated for solvent molecules (as discussed below, 5–9 kcal/mol instead of 15 kcal/mol for  $\Delta G_{\text{corr}}$  will be more realistic). It is also very unlikely that the simplified model without thf molecules is a true representation of the actual experiment since it precludes formation of products that arise from the *R*-configured Cu-alkyl species. To address the above issues, we have performed the following additional calculations depicted in Figure S3-1. There, mode of addition **S1** with 0, 2 and 3 thf molecules is compared to mode of addition **R2** with also 0, 2 and 3 thf molecules. The top grey curve uses gas phase entropies for thf molecules, which renders binding of thf unfavorable. Additionally we have included scenarios wherein the gas phase free energy correction per thf molecule ( $\sim 15$  kcal/mol) is overestimated by 4, 6 and 8 kcal/mol, respectively (black, blue and green curves). The same analysis has been performed with all other investigated functionals (cf. Figure S3-2). For the inclusion of 2 or 3 thf molecules in all other modes of Cu-H addition (**S2** and **R1**), see Figures S5 and S6, respectively.

The following analysis should serve as guidance to Figure S3-1: The gas phase free energies for Cu-H addition mode **S1** with 2 thf molecules and mode **R2** with 3 thf molecules are 18.9 and 33.9 kcal/mol, respectively (Figure S3-1). This corresponds to a difference of 15.0 kcal/mol. This means that in order to significantly disrupt the O<sup>Bpin</sup>→Na interaction (i.e., favoring path **R2** with 3 thf molecules), the gas phase correction to the free energy has to be overestimated by more than 15 kcal/mol, otherwise binding of a third thf molecule will be entropically disfavored. In order to allow for some formation of the *R*-configured Cu-alkyl species through pathway **R2**, the gas phase entropy likely has to be overestimated by about 12 kcal/mol with functional MN12SX and to a lesser degree with functionals ωB97XD (ca. 8 kcal/mol), M06 (ca. 8 kcal/mol) or MN12L (ca. 6 kcal/mol). In other words: applying an overestimation of 12 kcal/mol per thf molecule to mode **S1** with 2 thf molecules leads to a free energy of  $-5.1$  kcal/mol ( $= 18.9 - 2 \times 12.0$ ; cf. Figure S3-1). The same procedure applied to mode **R2** with 3 thf molecules yields a free

energy of  $-2.1$  kcal/mol ( $33.9 - 3 \times 12.0$ ; cf. Figure S3-1). Only under these conditions, generation of the *R*-configured Cu-alkyl species can become competitive ( $\Delta\Delta G$  between modes **S1** and **R2** will be close to 3 kcal/mol or below;  $= -2.1 - (-5.1)$  kcal/mol). Please note that the free energies after removal of the overestimated portion of the entropy are actually not negative, since additional thf molecules have not been included in the ground state Cu-H species, which would also experience a lowering in energy.

## Figures of Free Energy Surfaces

Free Energy Surface for Cu-H Addition/Allylic Substitution with ligand derived from imid-3

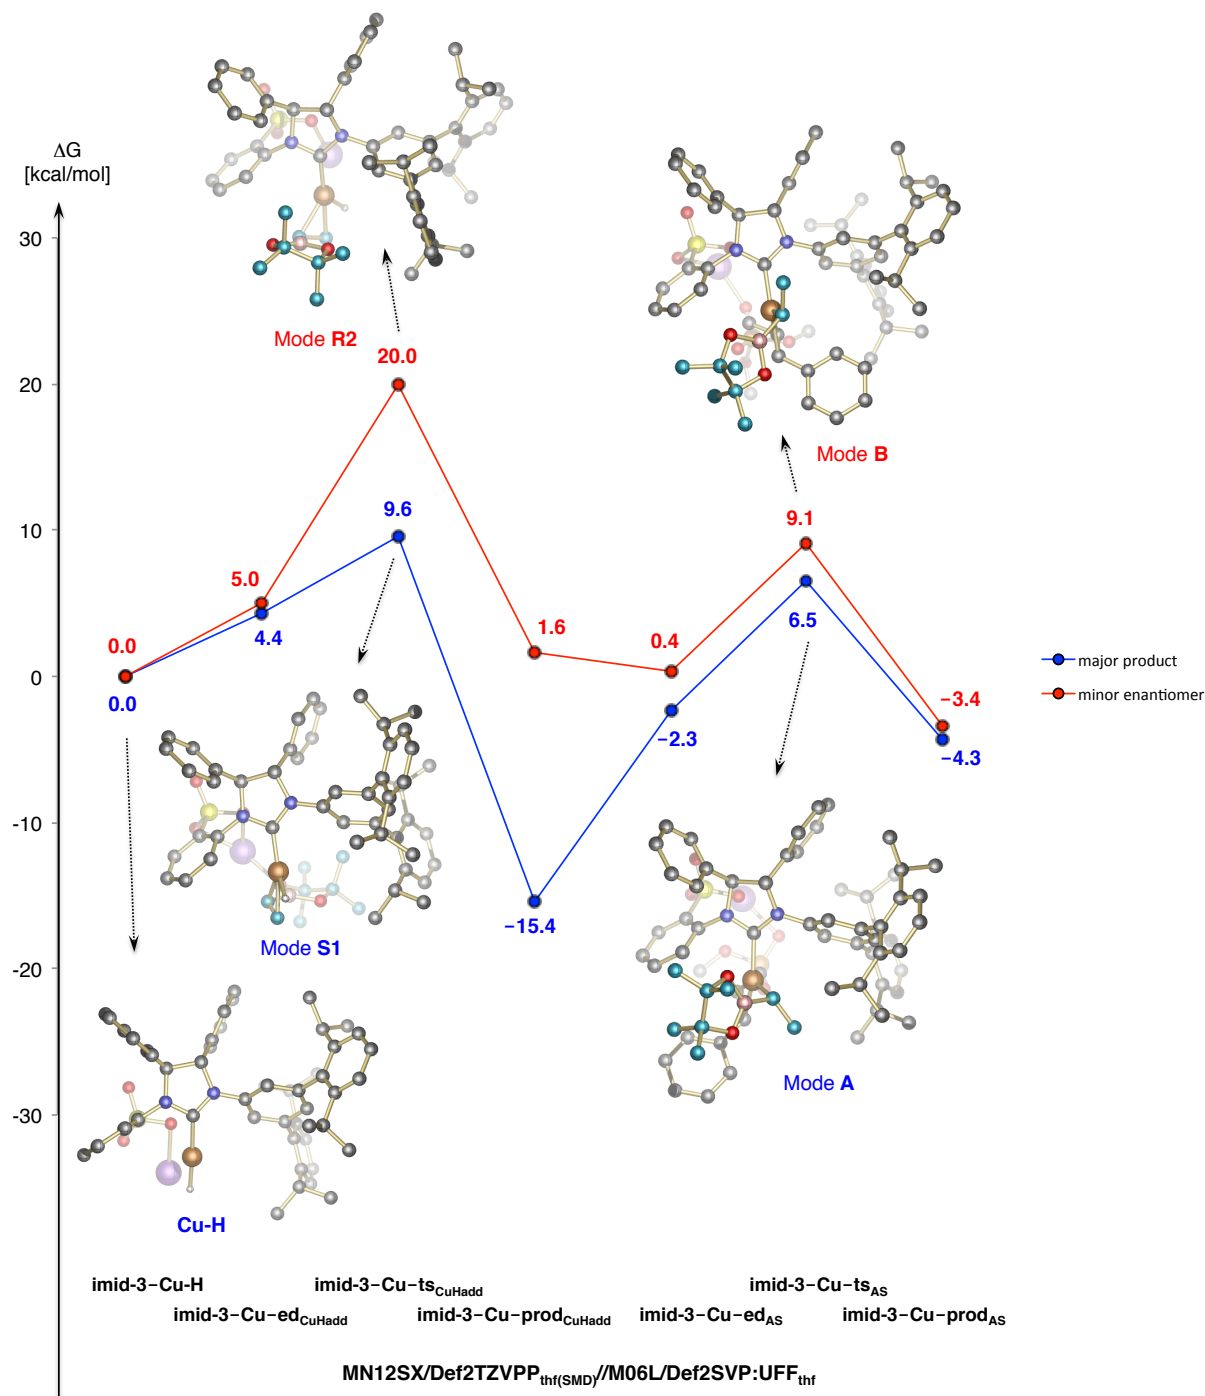

**Figure S1-1.** Free energy surfaces for Cu-H addition (CuHadd) and allylic substitution (AS) with NHC ligand derived from **imid-3** at the MN12SX/Def2TZVPP<sub>THF(SMD)</sub>/M06L/Def2SVP:UFF<sub>THF</sub> level (only lowest conformers for most critical pathways shown). For all other pathways including several conformers, see Figures S4-1 and S7-1.

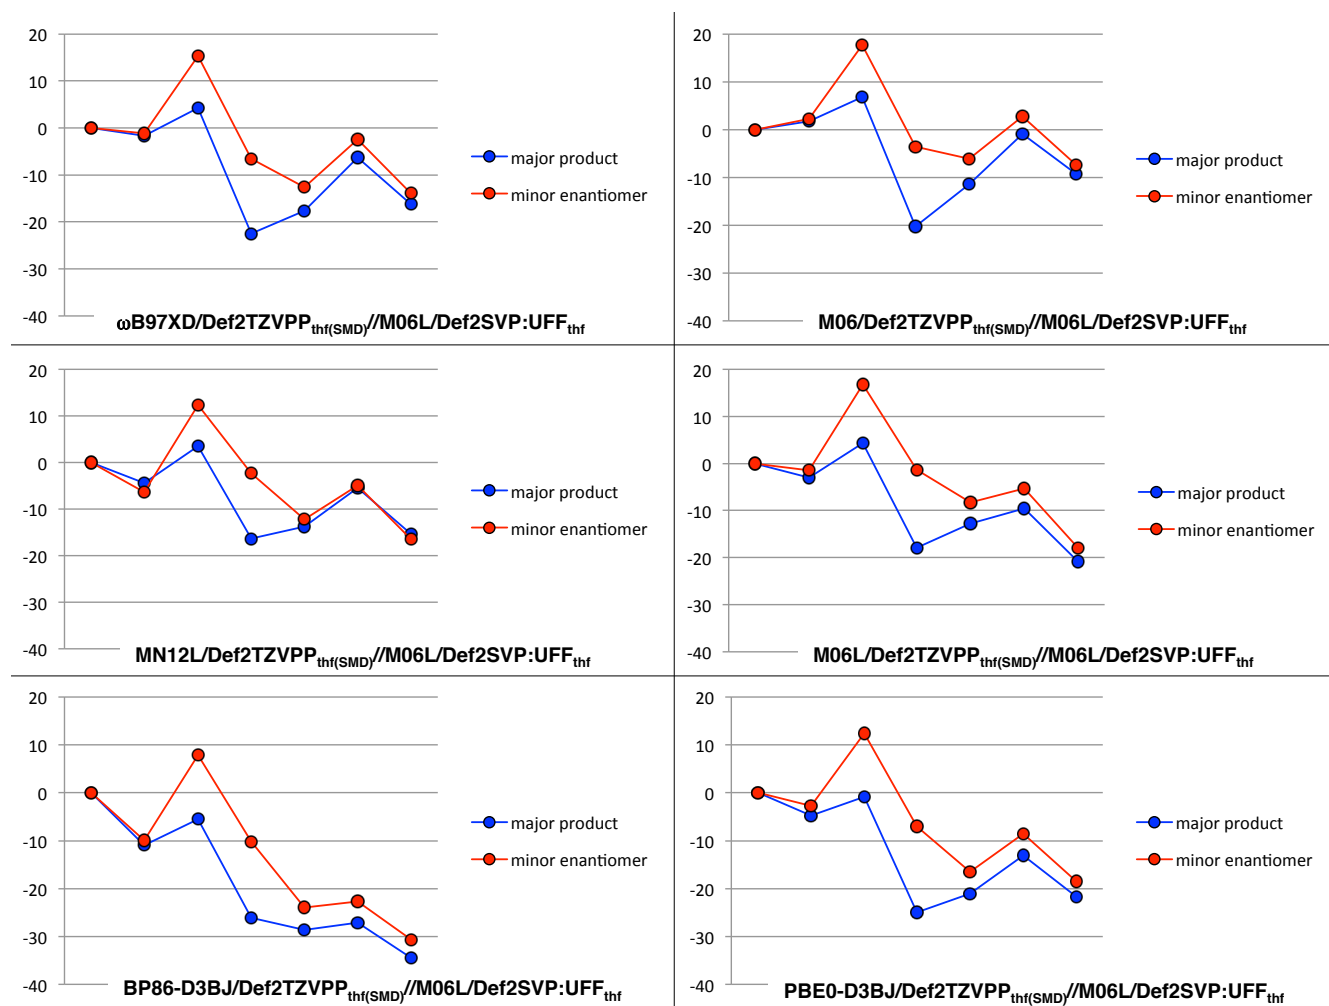

**Figure S1-2.** Free energy surfaces for Cu-H addition (CuHadd) and allylic substitution (AS) with NHC ligand derived from **imid-3** with various density functionals after optimization with M06L/Def2SVP:UFF<sub>THF</sub> (only lowest conformers for most critical pathways shown; cf. Figure S1-1). For all other pathways including several conformers, see Figures S4-2 and S7-2.

## Free Energy Surface for Cu-H Addition/Allylic Substitution with ligand derived from imid-2

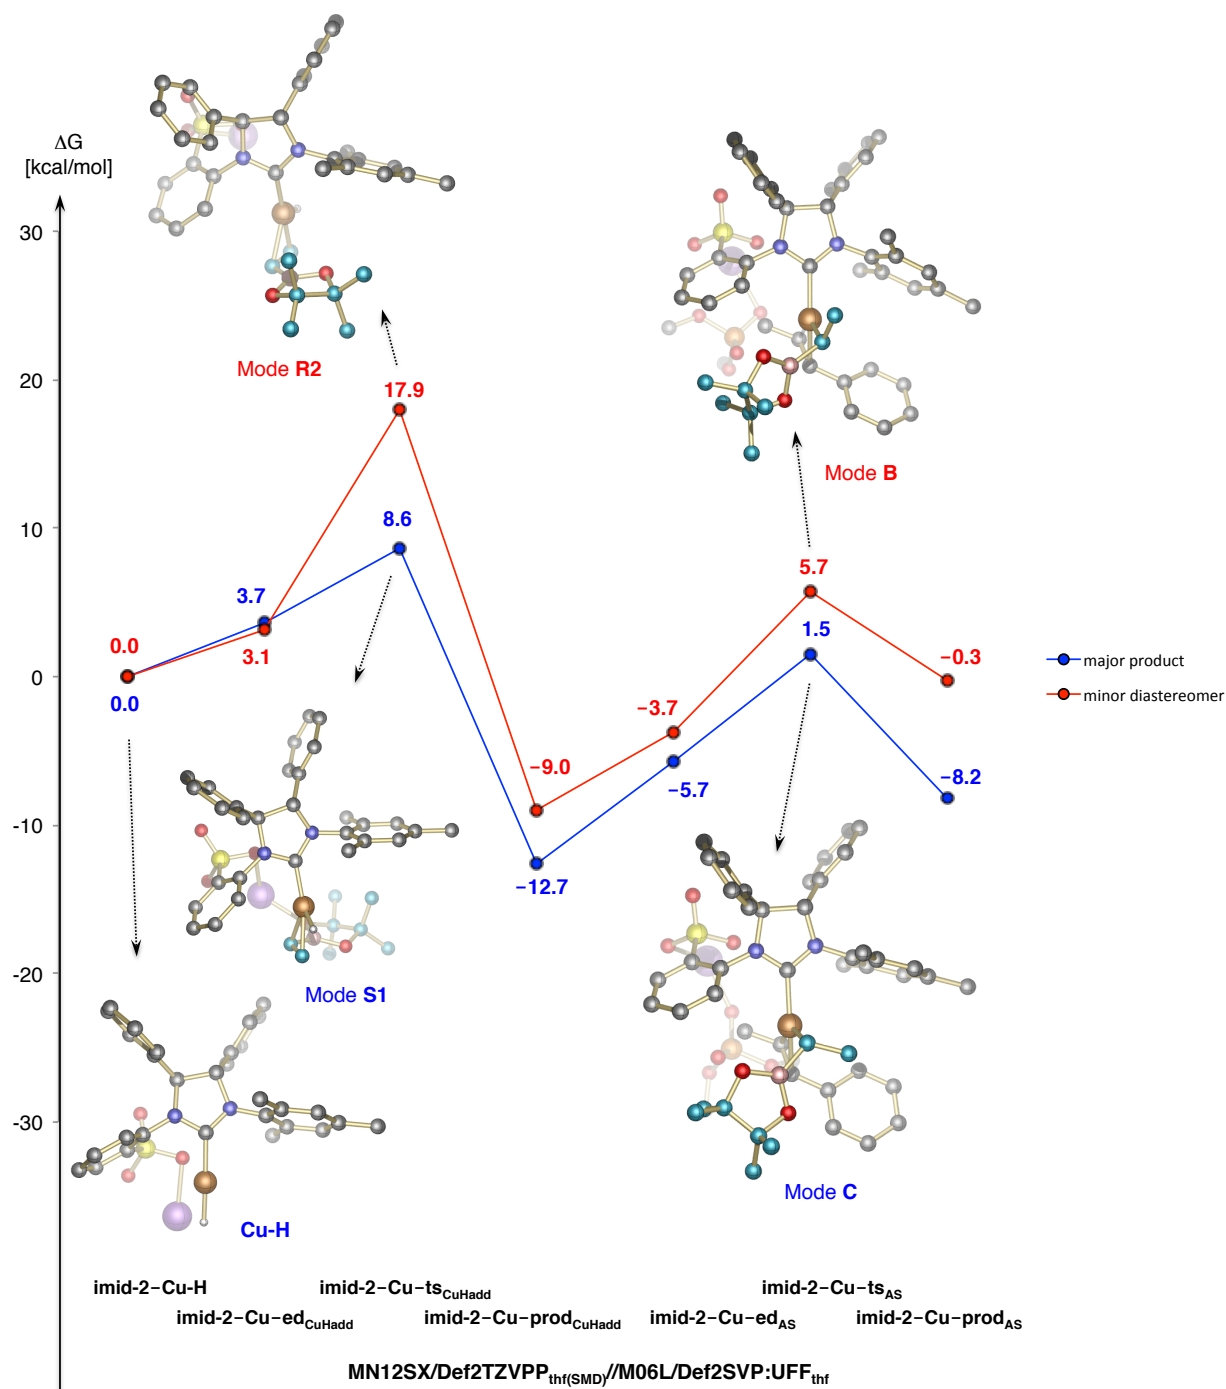

**Figure S2-1.** Free energy surfaces for Cu-H addition (CuHadd) and allylic substitution (AS) with NHC ligand derived from **imid-2** at the MN12SX/Def2TZVPP<sub>THF(SMD)</sub>/M06L/Def2SVP:UFF<sub>THF</sub> level (only lowest conformers for most critical pathways shown). For all other pathways including several conformers, see Figures S8-1 and S9-1.

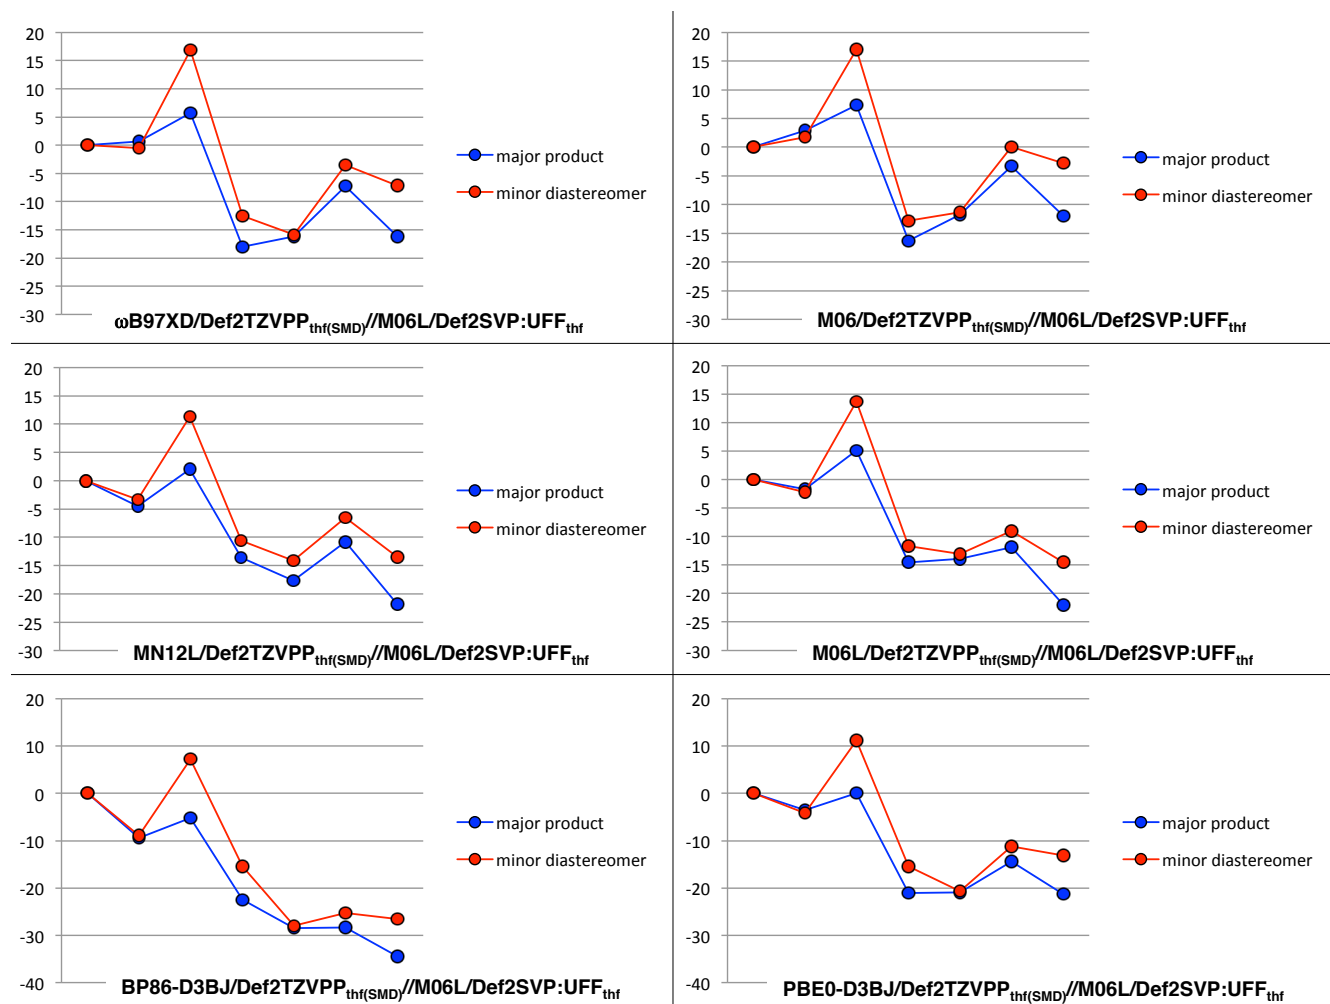

**Figure S2-2.** Free energy surfaces for Cu-H addition (CuHadd) and allylic substitution (AS) with NHC ligand derived from **imid-2** with various density functionals after optimization with M06L/Def2SVP:UFF<sub>thf</sub> (only lowest conformers for most critical pathways shown; cf. Figure S2-1). For all other pathways including several conformers, see Figures S8-2 and S9-2.

Detailed Investigation of the  $O^{\text{Bpin}} \rightarrow \text{Metal}$  Coordination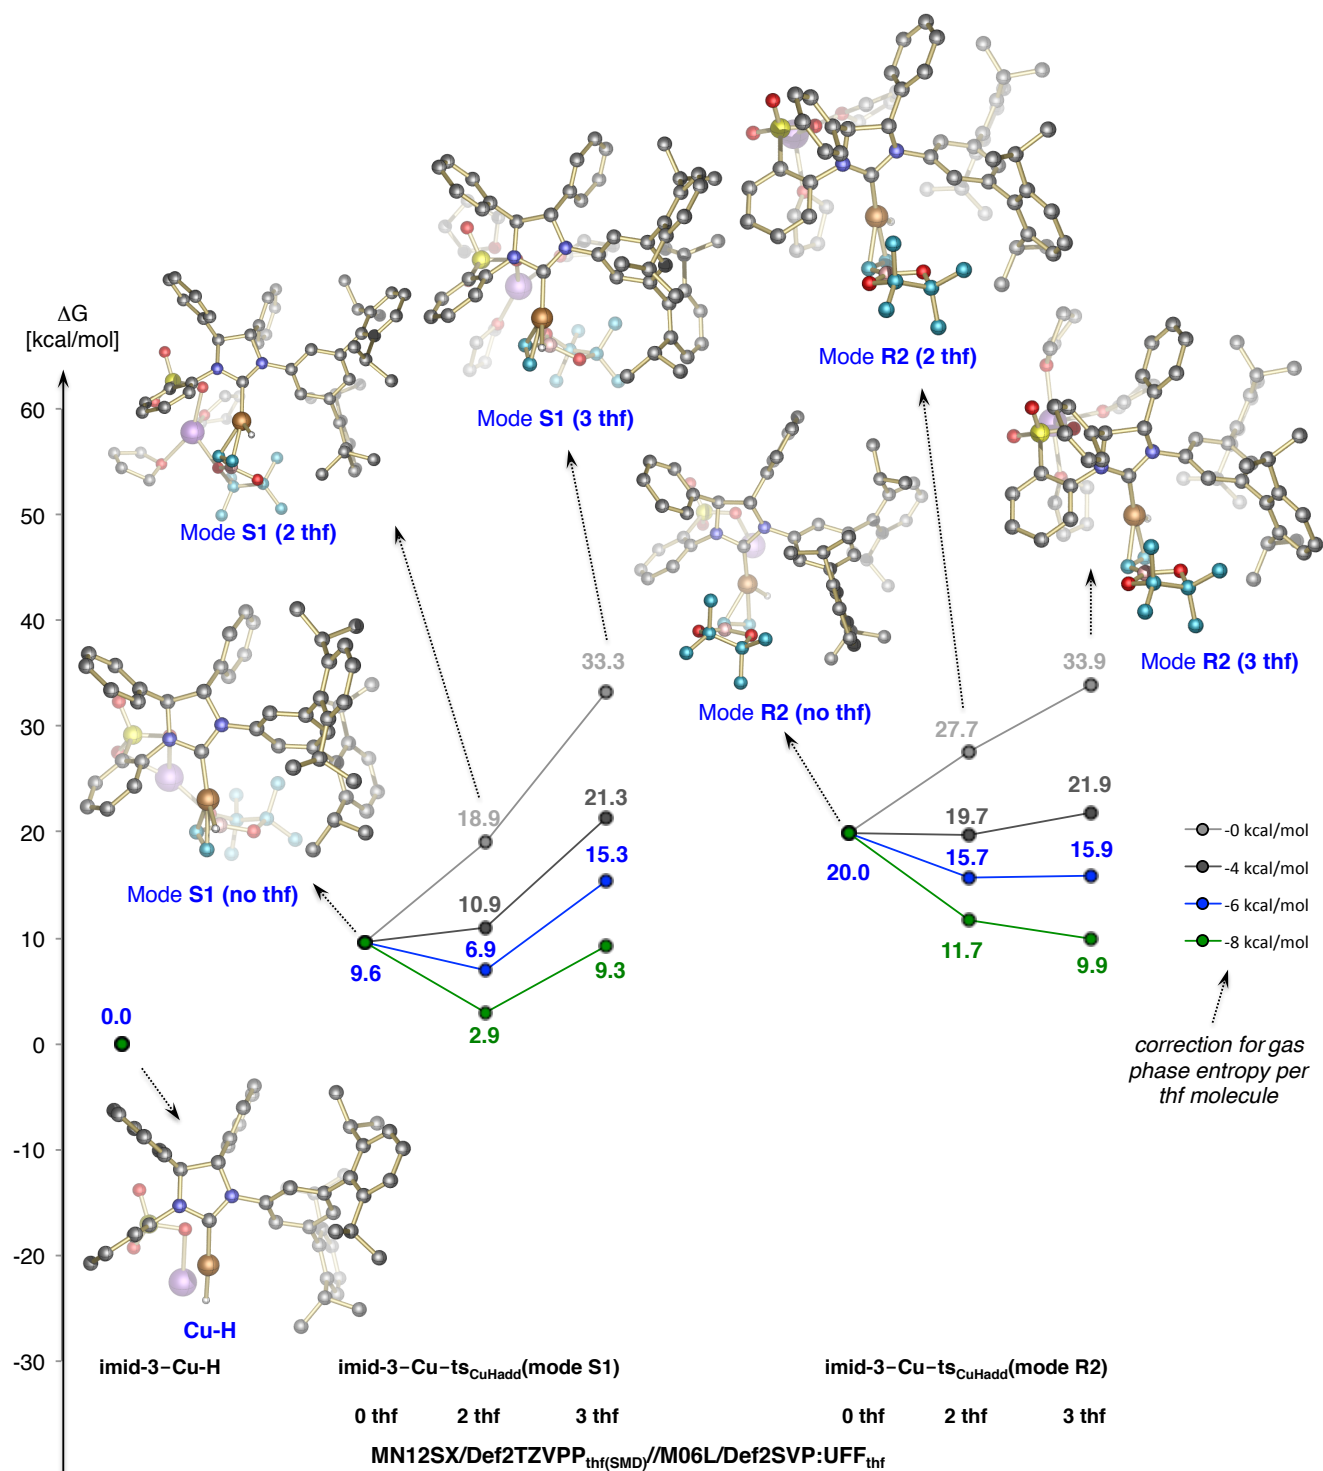

**Figure S3-1.** Free energies for Cu-H addition (CuHadd) with NHC ligand derived from **imid-3** at the MN12SX/Def2TZVPP<sub>THF(SMD) // M06L/Def2SVP:UFF<sub>THF</sub></sub> level with varying number of thf molecules coordinated to the Na counterion (only lowest conformers for pathways **S1** and **R2** shown). For all other pathways including several conformers, see Figures S4-1, S5-1 and S6-1.

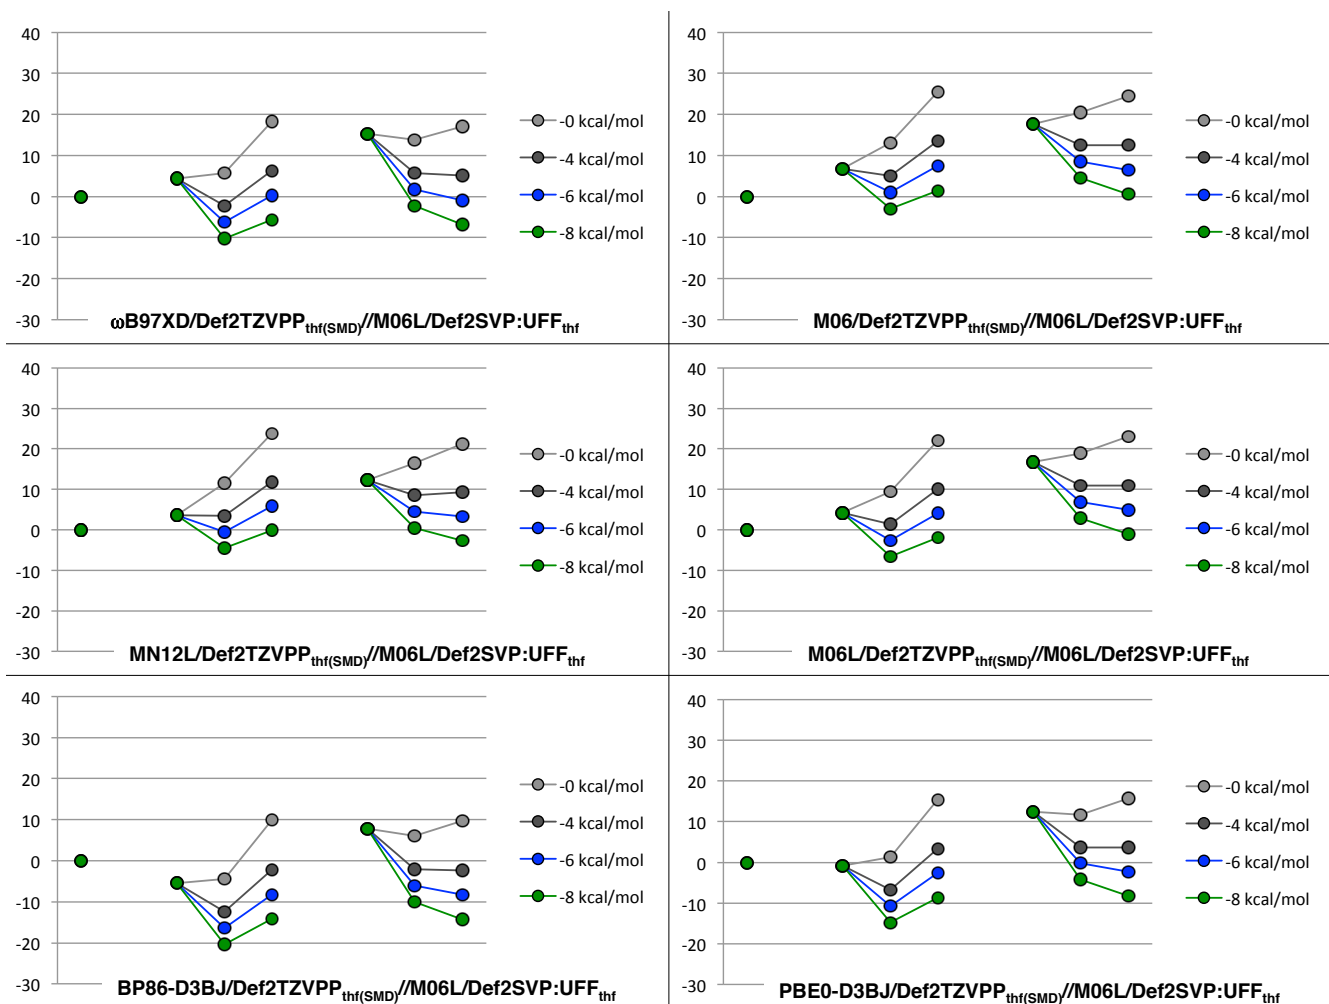

**Figure S3-2.** Free energies for Cu-H addition (CuHadd) with NHC ligand derived from imid-3 with various density functionals after optimization with M06L/Def2SVP:UFF<sub>THF</sub> with varying number of thf molecules coordinated to the Na counterion (only lowest conformers for pathways **S1** and **R2** shown; cf. Figure S3-1). For all other pathways including several conformers, see Figures S4-2, S5-2 and S6-2.



## Several Pathways and Conformers for Cu-H Addition (model without explicit thf molecules) with ligand derived from imid-3

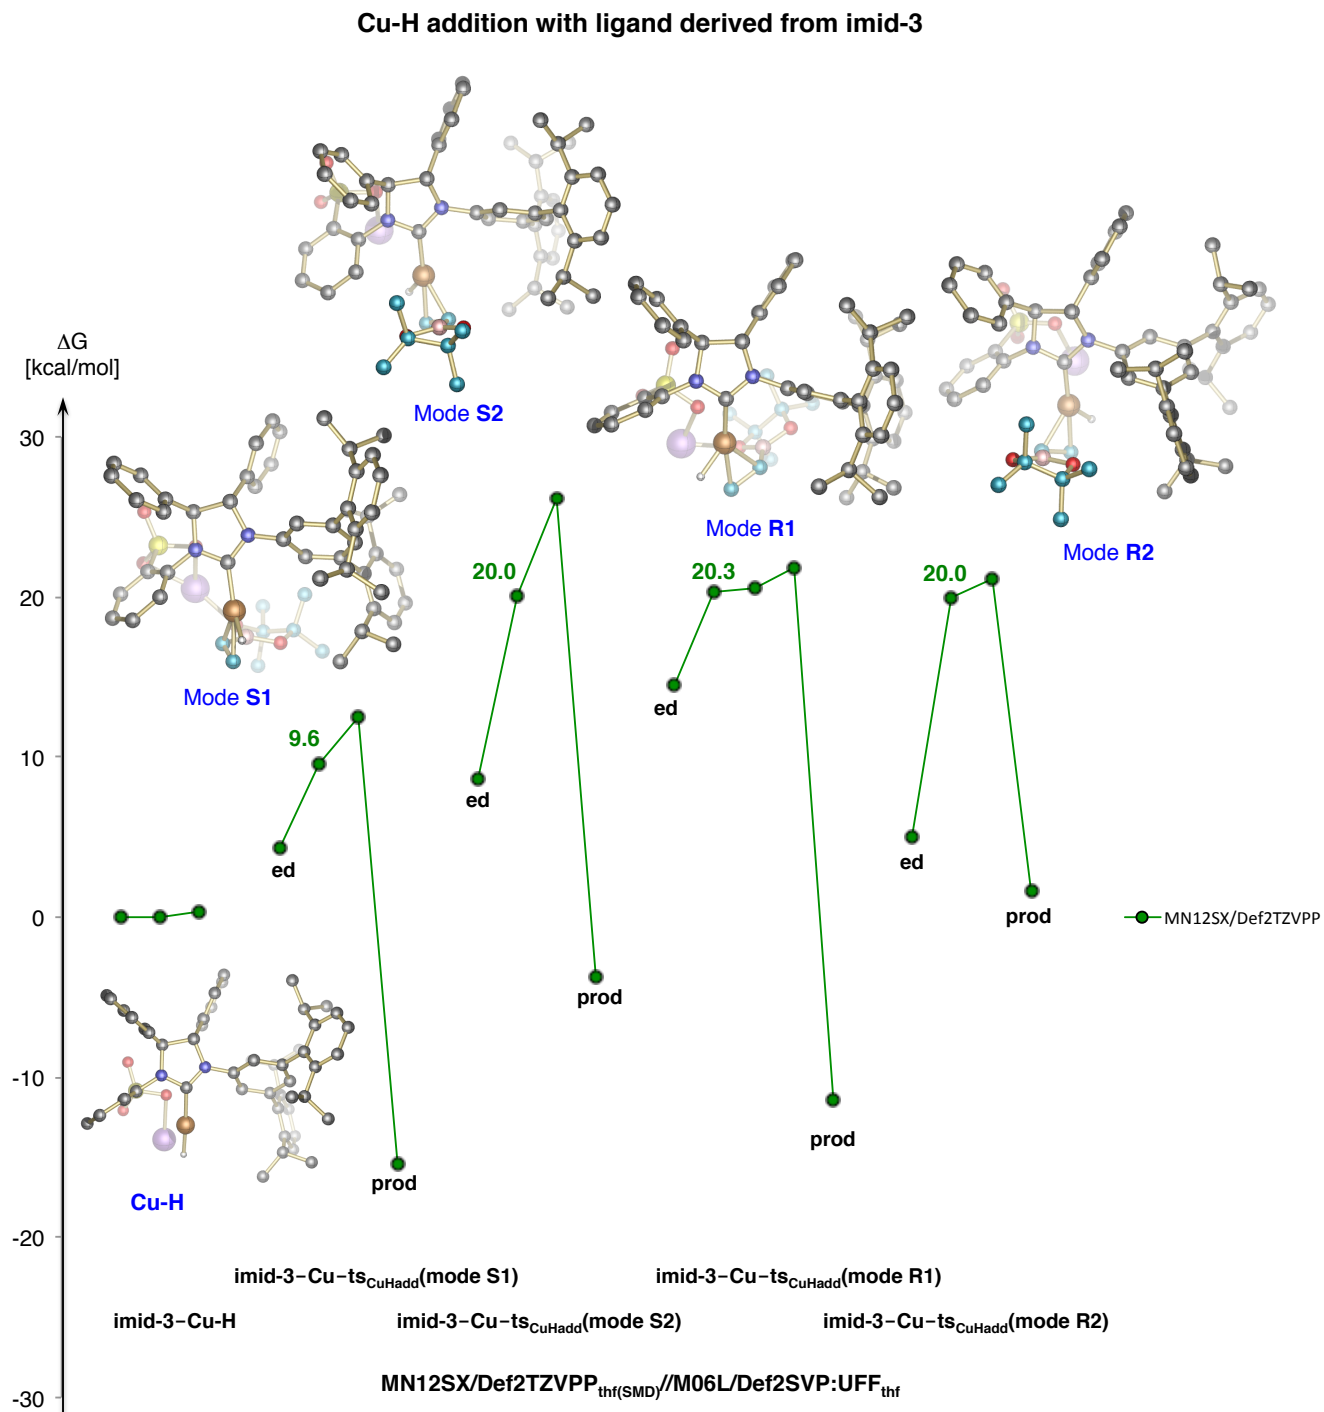

**Figure S4-1.** Free energy surfaces for Cu-H addition (CuHadd) with NHC ligand derived from **imid-3** at the MN12SX/Def2TZVPP<sub>THF(SMD)</sub>//M06L/Def2SVP:UFF<sub>THF</sub> level (all pathways **S1**, **S2**, **R1** and **R2** shown, including one **ed** and **prod** for each mode of addition).

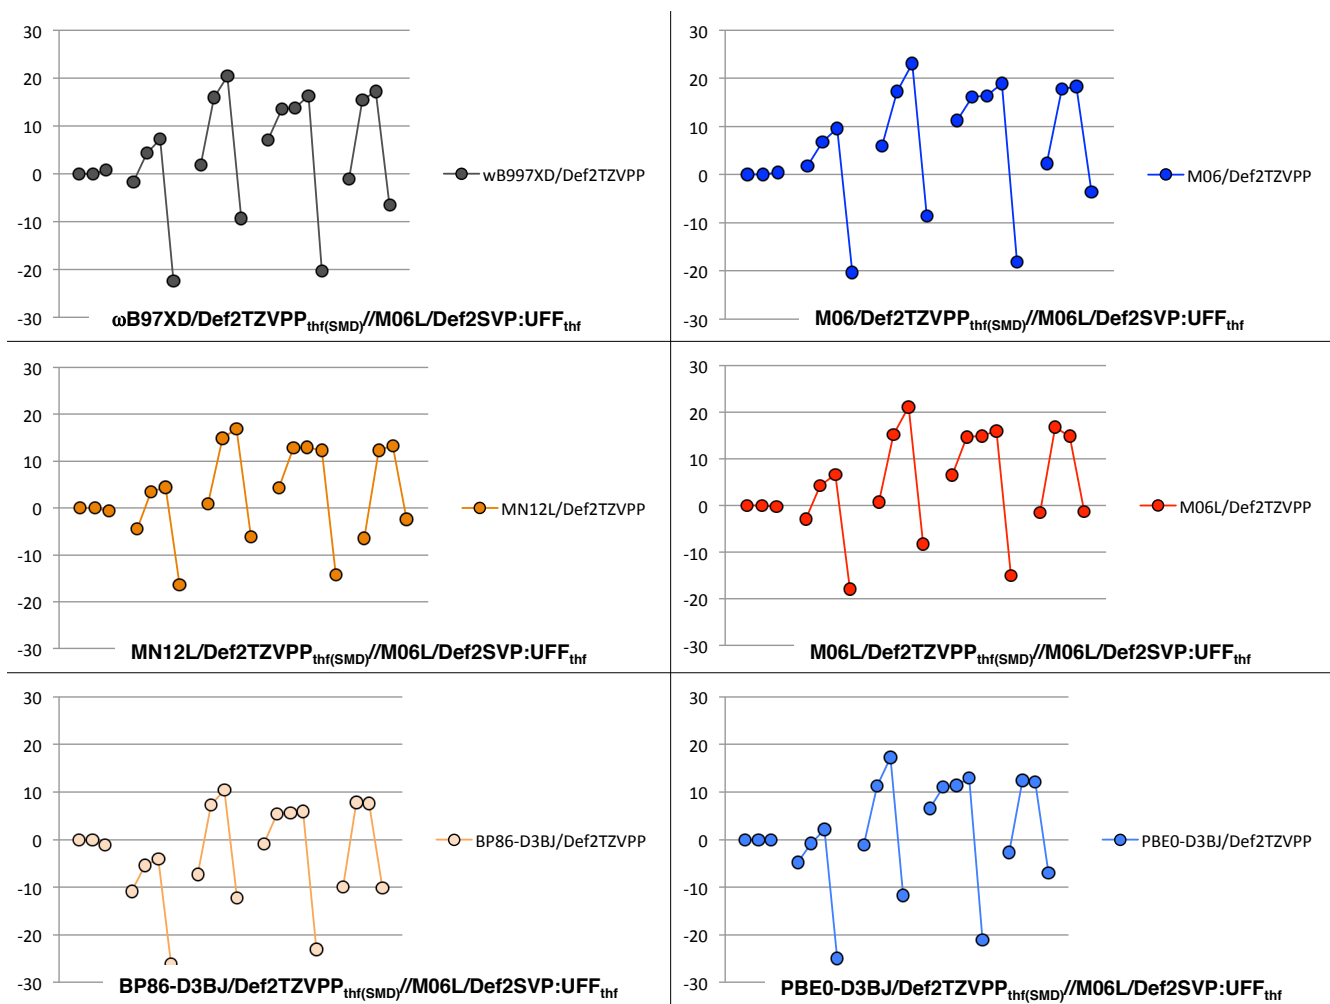

**Figure S4-2.** Free energy surfaces for Cu-H addition (CuHadd) with NHC ligand derived from **imid-3** with various density functionals after optimization with M06L/Def2SVP:UFF<sub>THF</sub> (all pathways **S1**, **S2**, **R1** and **R2** shown, including one **ed** and **prod** for each mode of addition; cf. Figure S4-1).

### Several Pathways and Conformers for Cu-H Addition (model with 2 explicit thf molecules) with ligand derived from imid-3

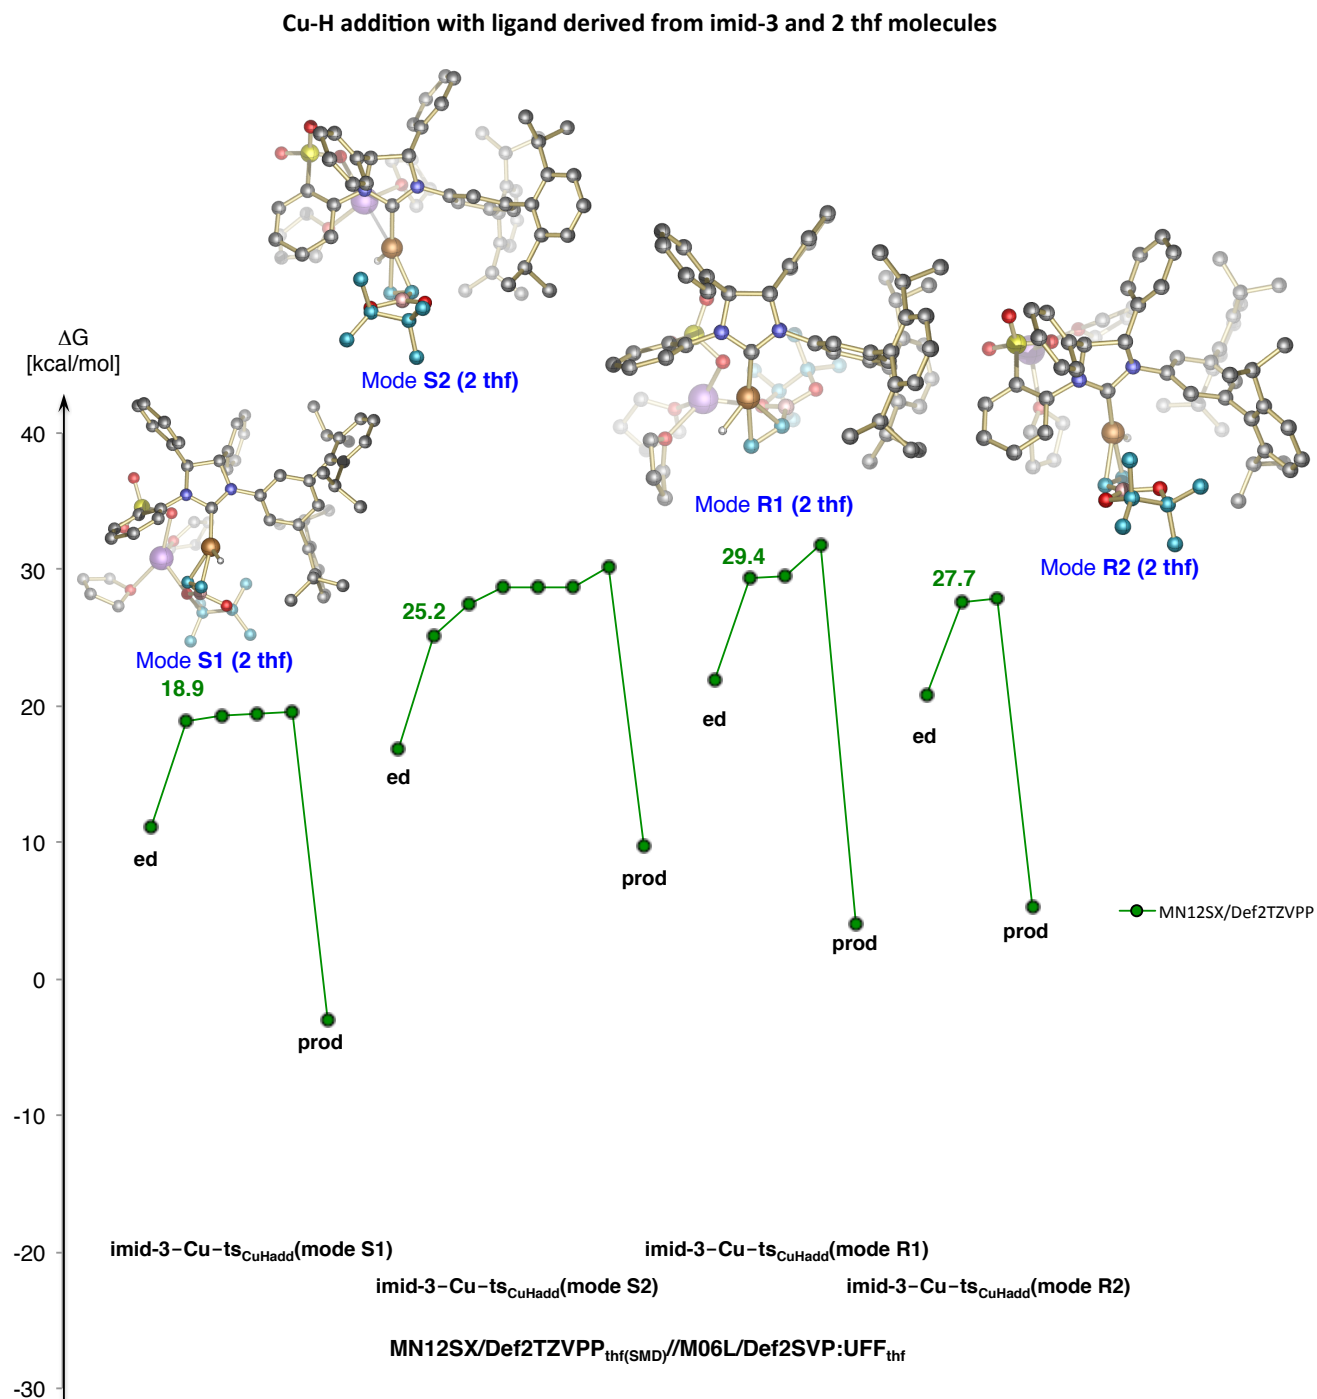

**Figure S5-1.** Free energy surfaces for Cu-H addition (CuHadd) with NHC ligand derived from **imid-3** with two explicit thf molecules coordinated to the Na counterion at the MN12SX/Def2TZVPP<sub>THF(SMD)</sub>//M06L/Def2SVP:UFF<sub>THF</sub> level (all pathways **S1**, **S2**, **R1** and **R2** shown, including one **ed** and **prod** for each mode of addition).

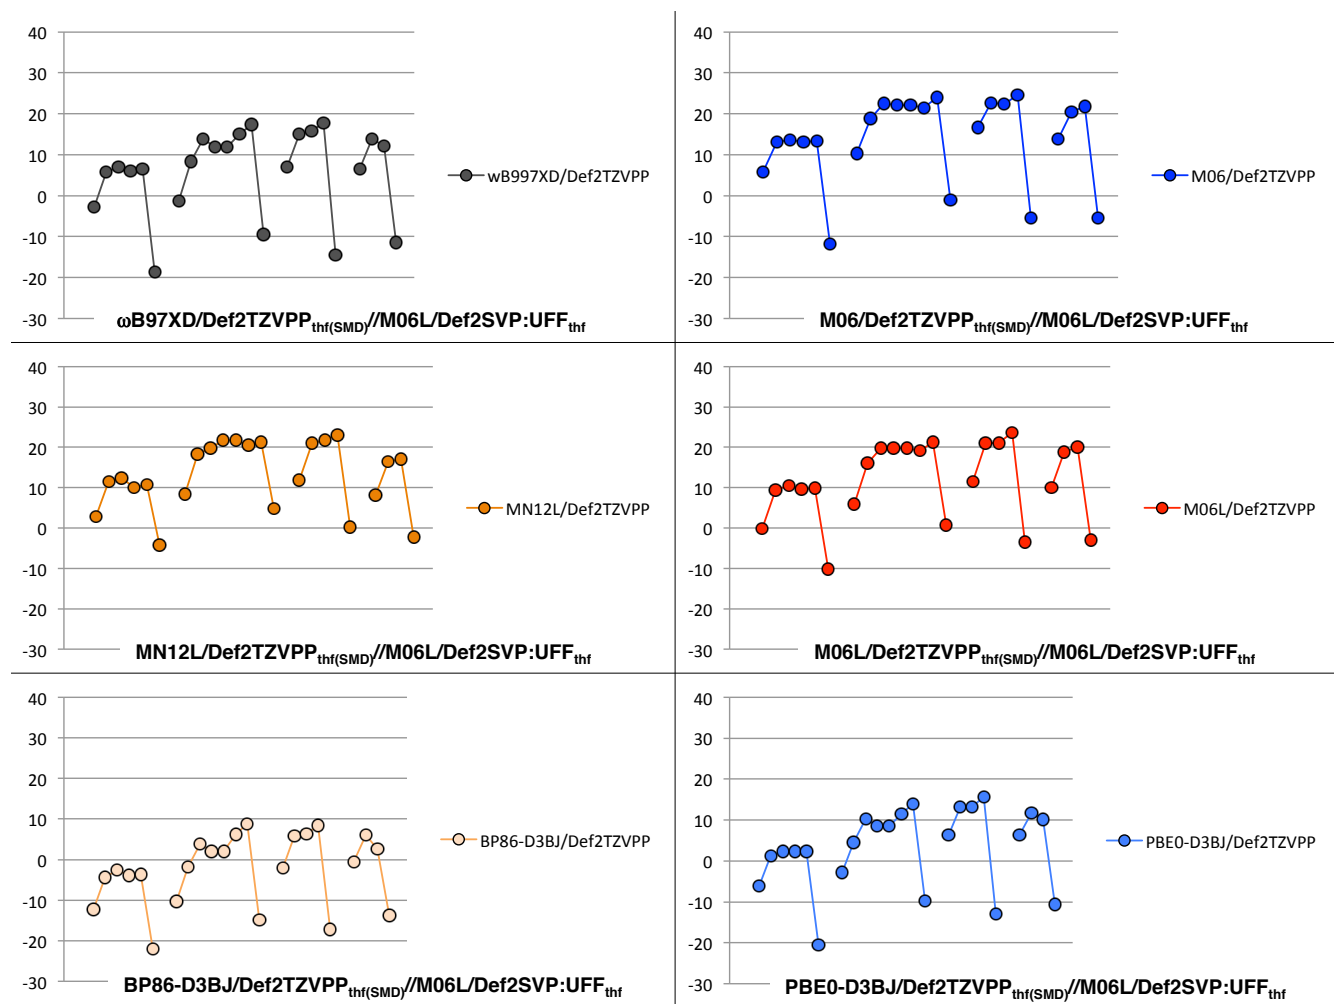

**Figure S5-2.** Free energy surfaces for Cu-H addition (CuHadd) with NHC ligand derived from **imid-3** with two explicit thf molecules coordinated to the Na counterion with various density functionals after optimization with M06L/Def2SVP:UFF<sub>thf</sub> (all pathways **S1**, **S2**, **R1** and **R2** shown, including one **ed** and **prod** for each mode of addition; cf. Figure S5-1).

## Several Pathways and Conformers for Cu-H Addition (model with 3 explicit thf molecules) with ligand derived from imid-3

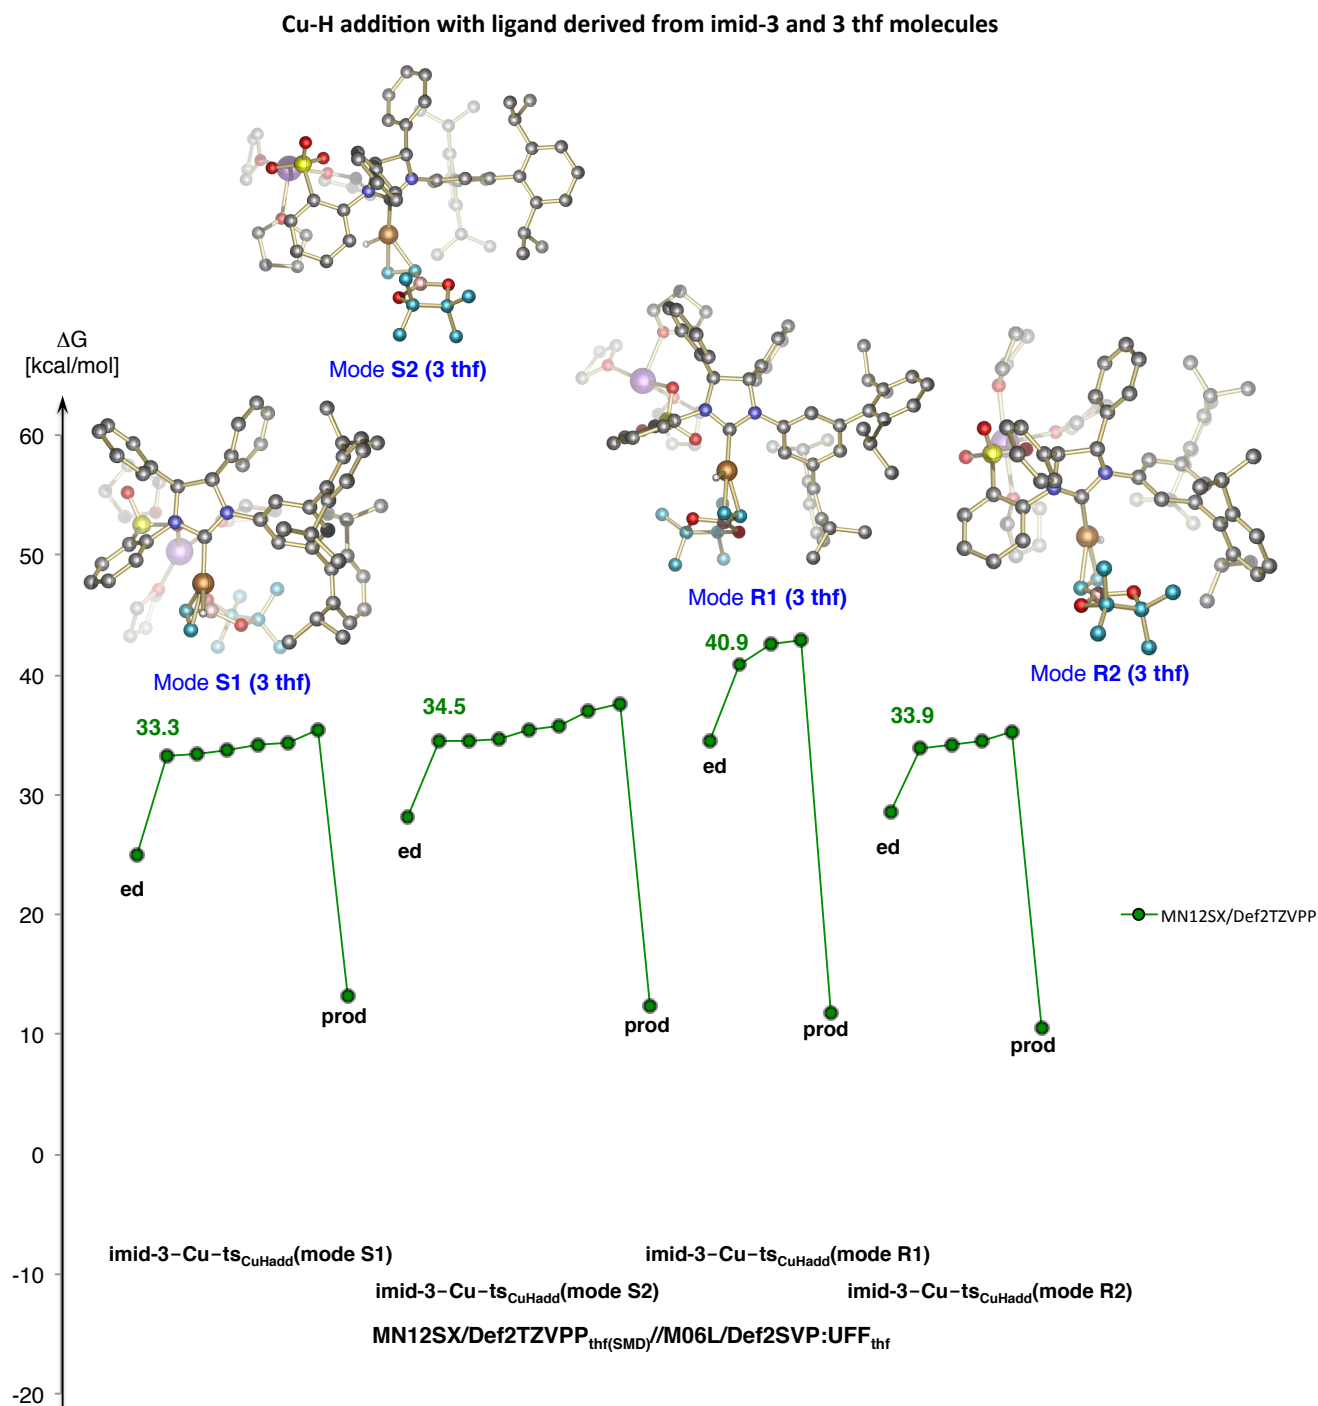

**Figure S6-1.** Free energy surfaces for Cu-H addition (CuHadd) with NHC ligand derived from **imid-3** with three explicit thf molecules coordinated to the Na counterion at the MN12SX/DefTZVPP<sub>THF(SMD)</sub>//M06L/Def2SVP:UFF<sub>THF</sub> level (all pathways **S1**, **S2**, **R1** and **R2** shown, including one **ed** and **prod** for each mode of addition).

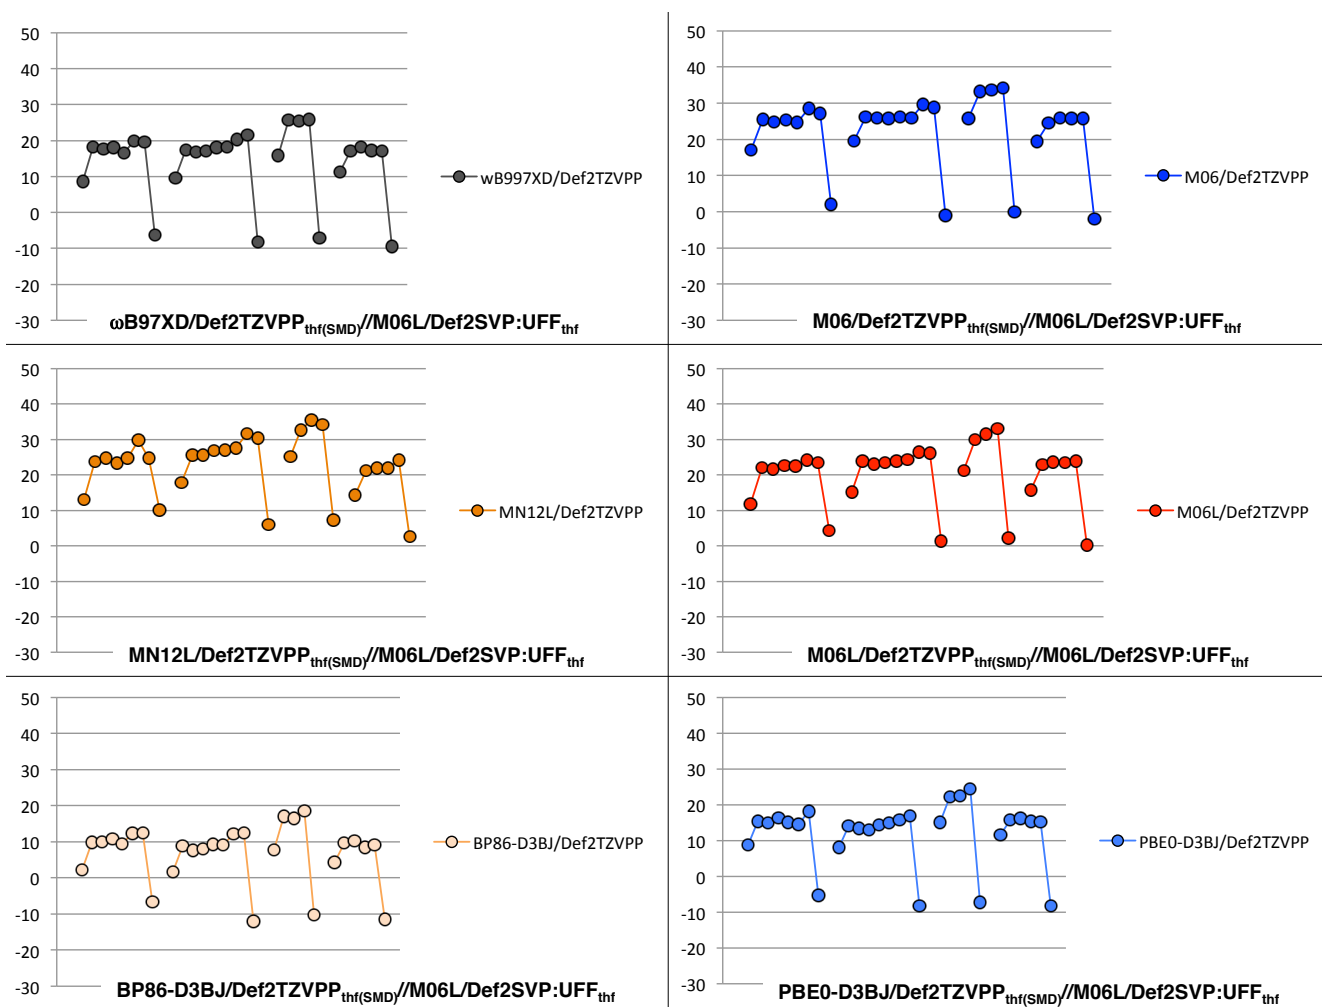

**Figure S6-2.** Free energy surfaces for Cu-H addition (CuHadd) with NHC ligand derived from **imid-3** with three explicit thf molecules coordinated to the Na counterion with various density functionals after optimization with M06L/Def2SVP:UFF<sub>thf</sub> (all pathways **S1**, **S2**, **R1** and **R2** shown, including one **ed** and **prod** for each mode of addition; cf. Figure S6-1).

## Several Pathways and Conformers for Allylic Substitution with ligand derived from imid-3

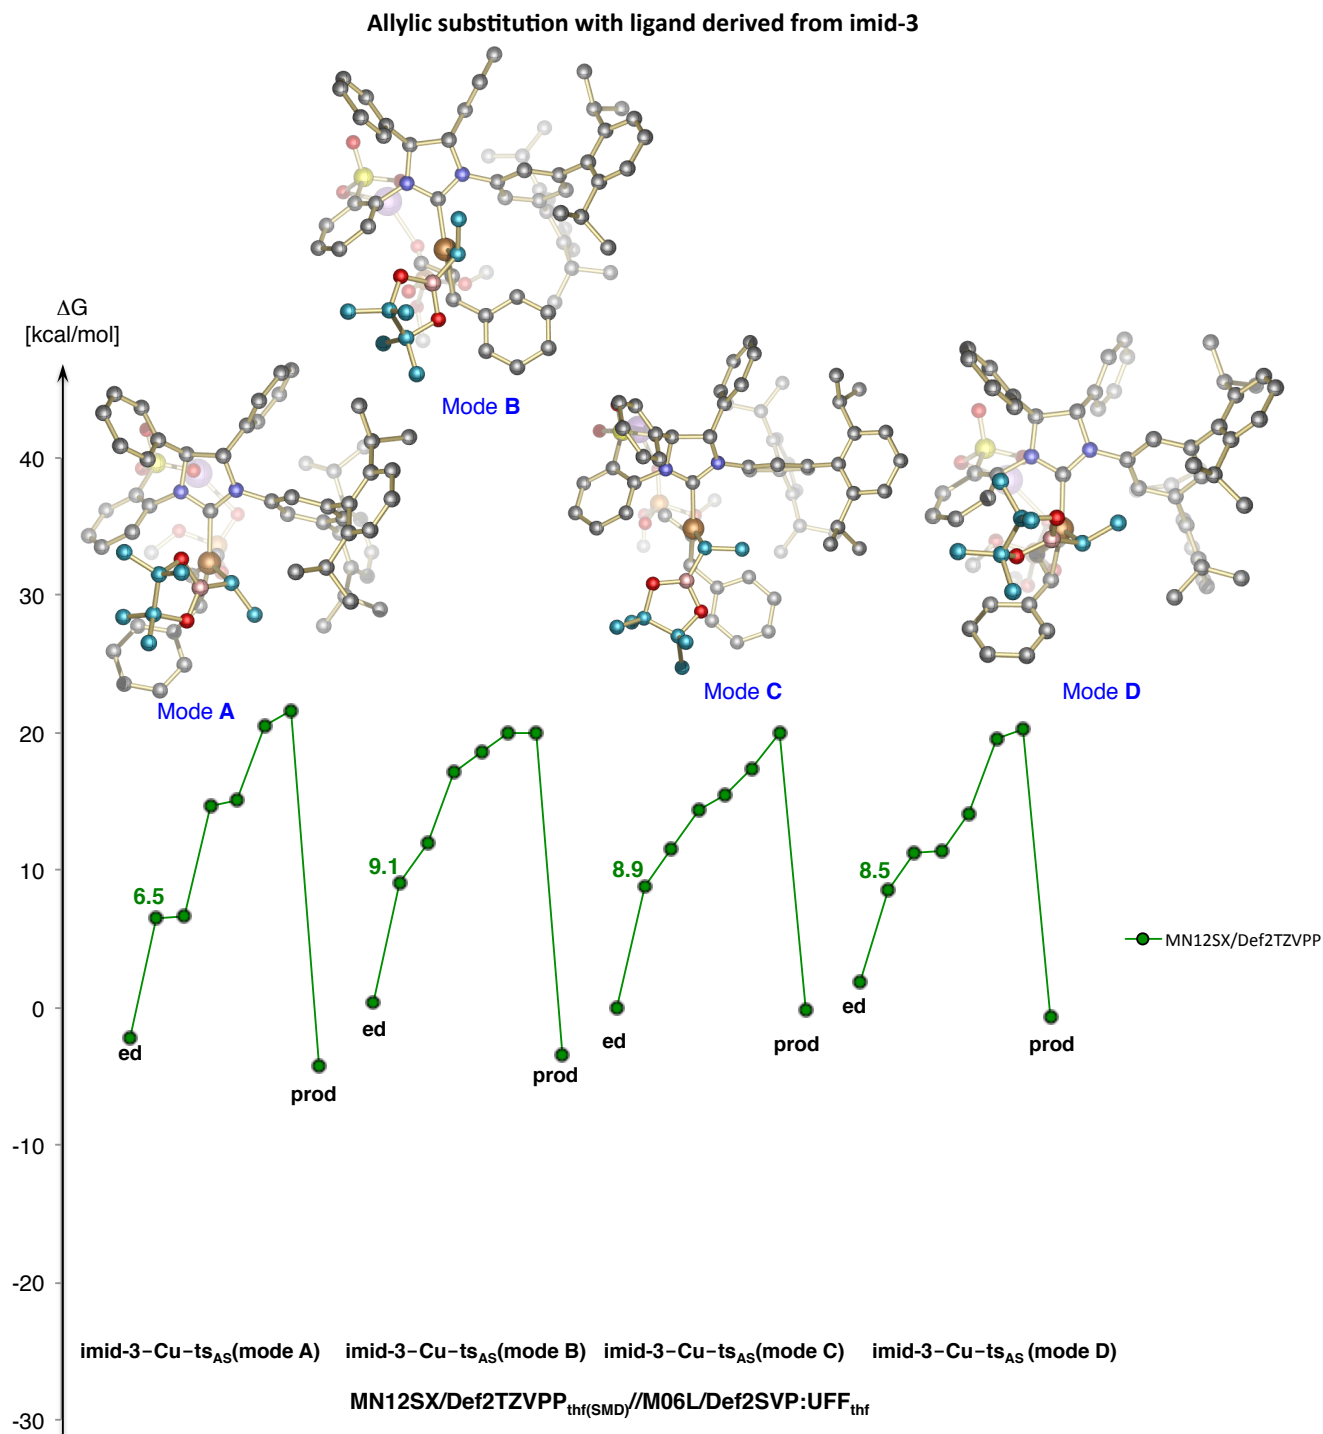

**Figure S7-1.** Free energy surfaces for allylic substitution (AS) with NHC ligand derived from **imid-3** at the MN12SX/Def2TZVPP<sub>THF(SMD) // M06L/Def2SVP:UFF<sub>THF</sub></sub> level (all pathways **A**, **B**, **C** and **D** shown, including one **ed** and **prod** for each mode of addition).

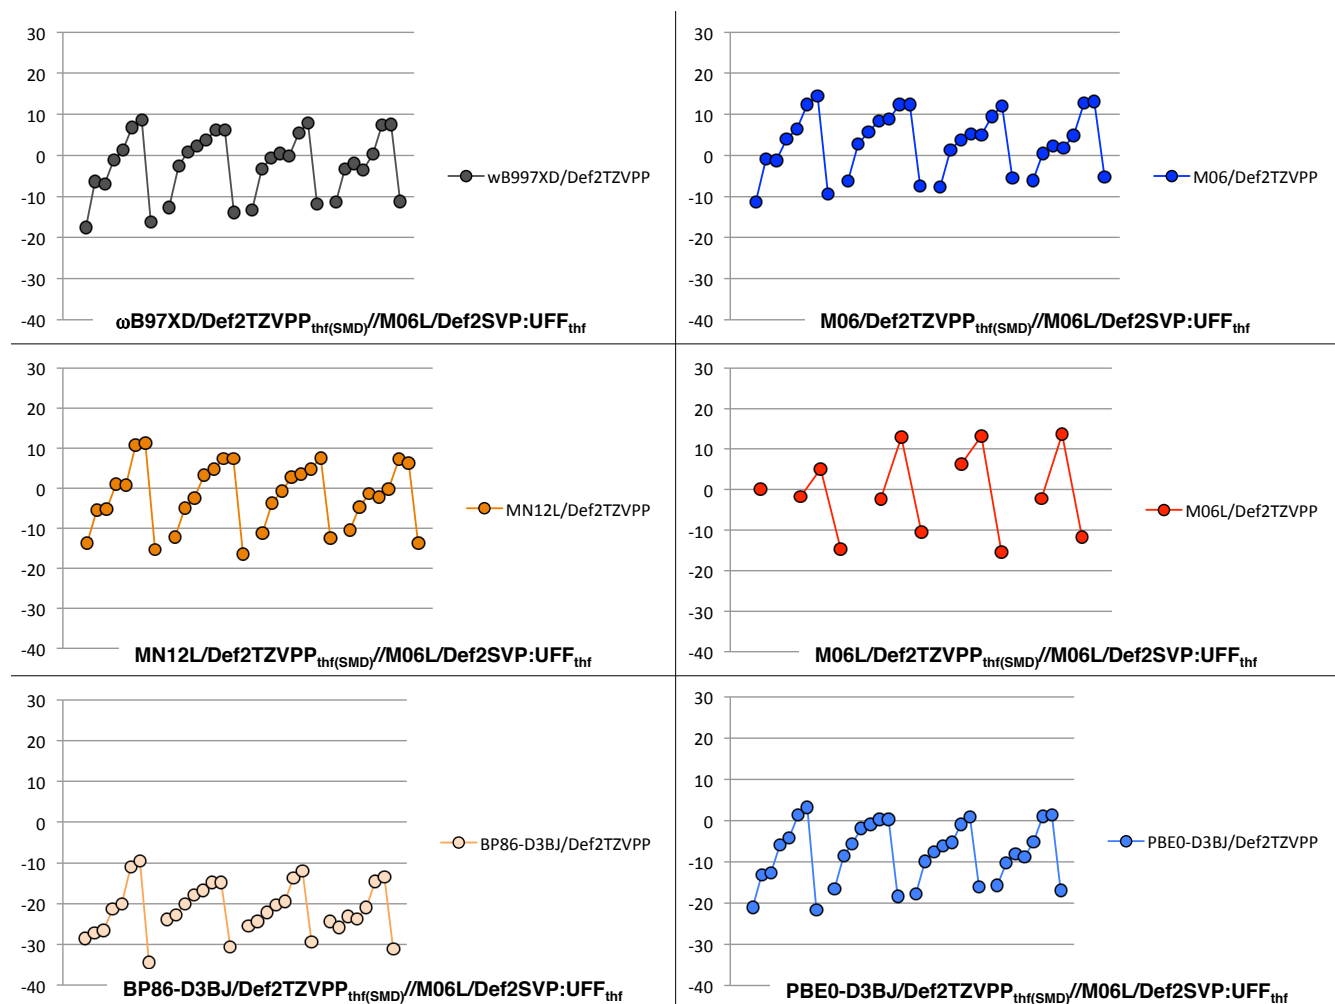

**Figure S7-2.** Free energy surfaces for allylic substitution (AS) with NHC ligand derived from **imid-3** with various density functionals after optimization with M06L/Def2SVP:UFF<sub>THF</sub> (all pathways **A**, **B**, **C** and **D** shown, including one **ed** and **prod** for each mode of addition; cf. Figure S7-1).



## Several Pathways and Conformers for Cu-H Addition (model without explicit thf molecules) with ligand derived from imid-2

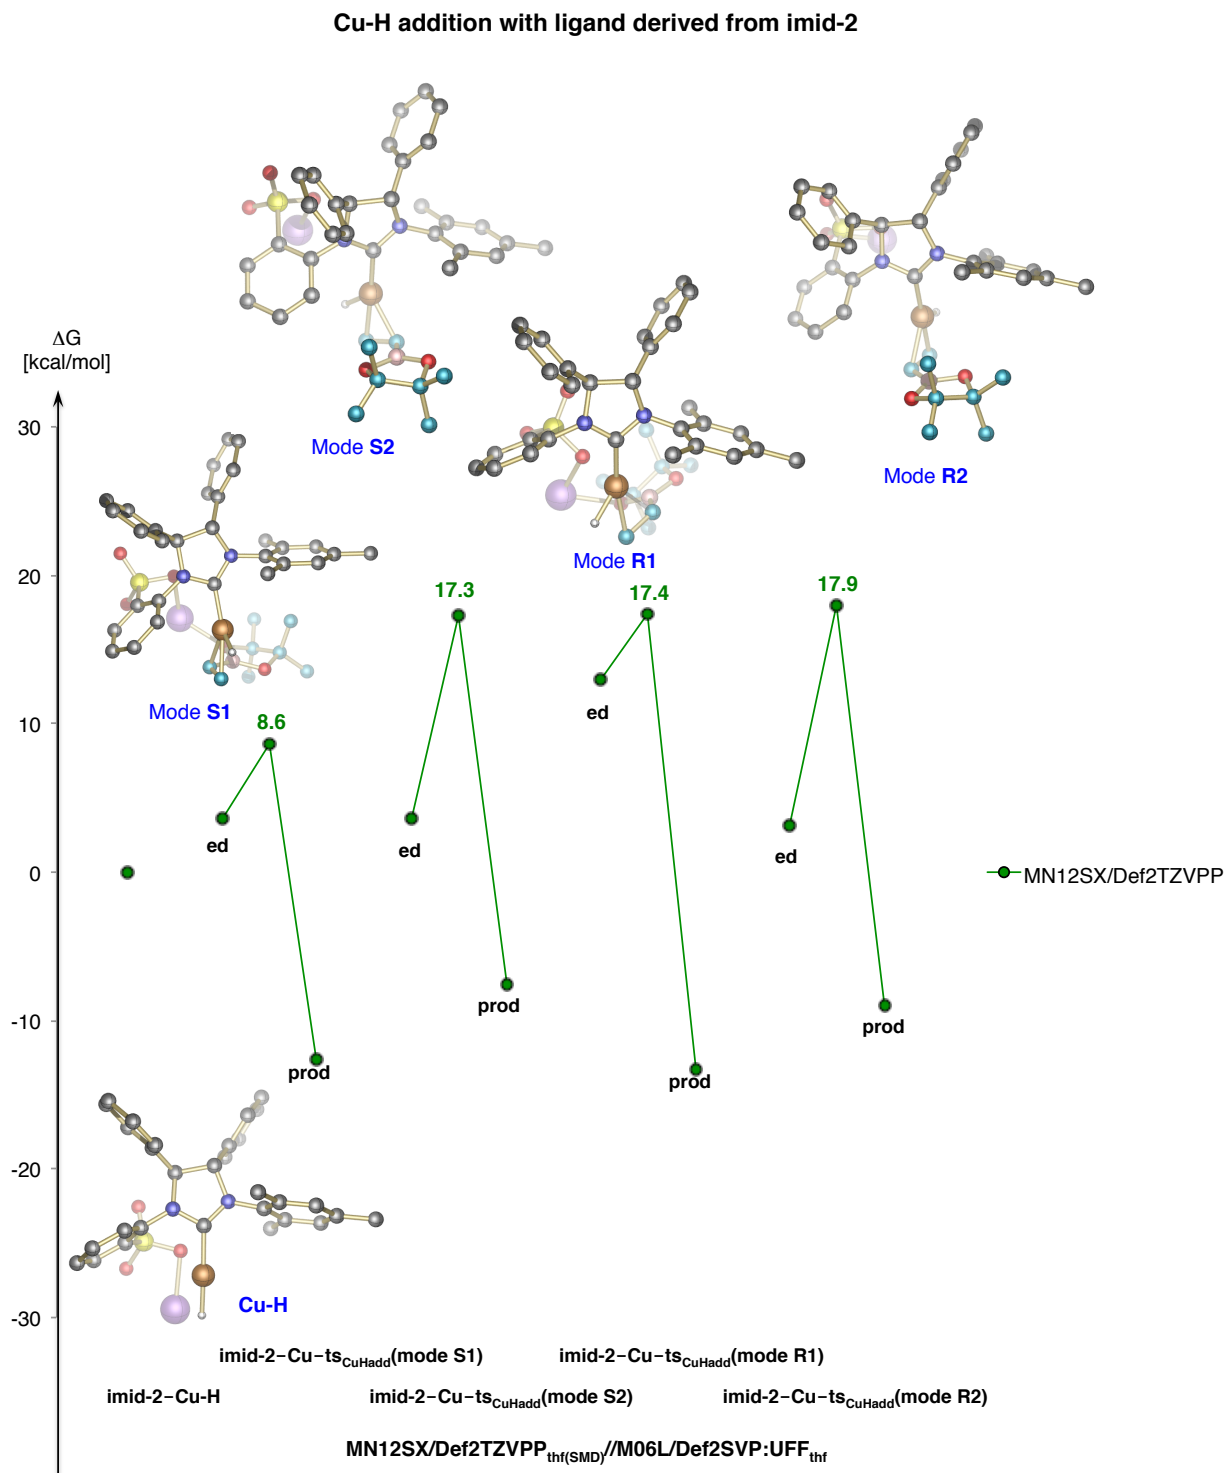

**Figure S8-1.** Free energy surfaces for Cu-H addition (CuHadd) with NHC ligand derived from **imid-2** at the MN12SX/Def2TZVPP<sub>THF(SMD)/M06L/Def2SVP:UFF<sub>THF</sub></sub> level (all pathways **S1**, **S2**, **R1** and **R2** shown, including one **ed** and **prod** for each mode of addition).

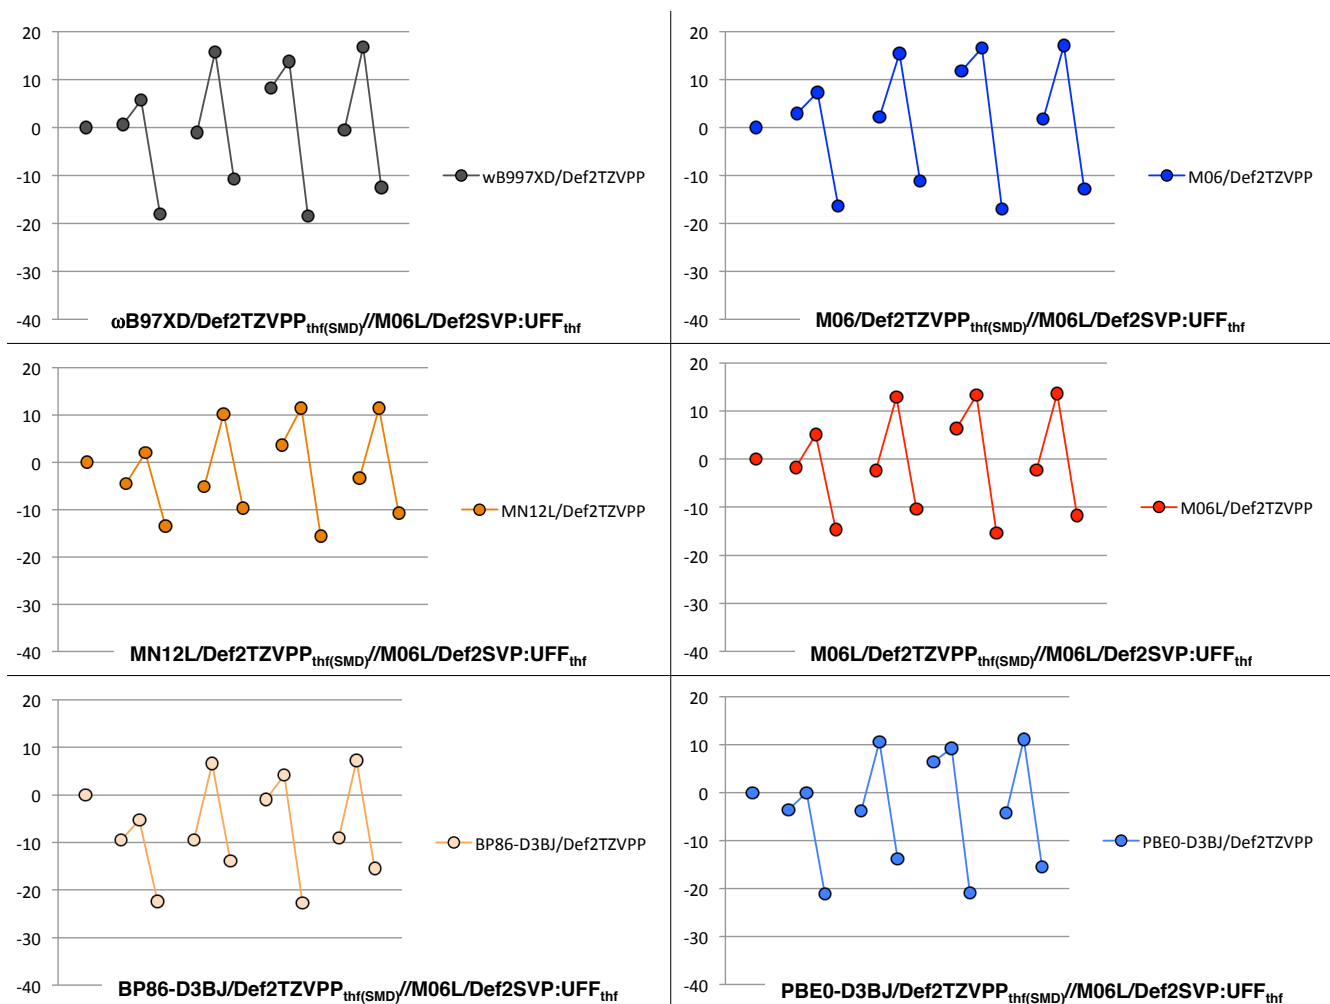

**Figure S8-2.** Free energy surfaces for Cu-H addition (CuHadd) with NHC ligand derived from imid-2 with various density functionals after optimization with M06L/Def2SVP:UFF<sub>THF</sub> (all pathways **S1**, **S2**, **R1** and **R2** shown, including one **ed** and **prod** for each mode of addition; cf. Figure S8-1).

## Several Pathways and Conformers for Cu-H Allylic Substitution with ligand derived from imid-2

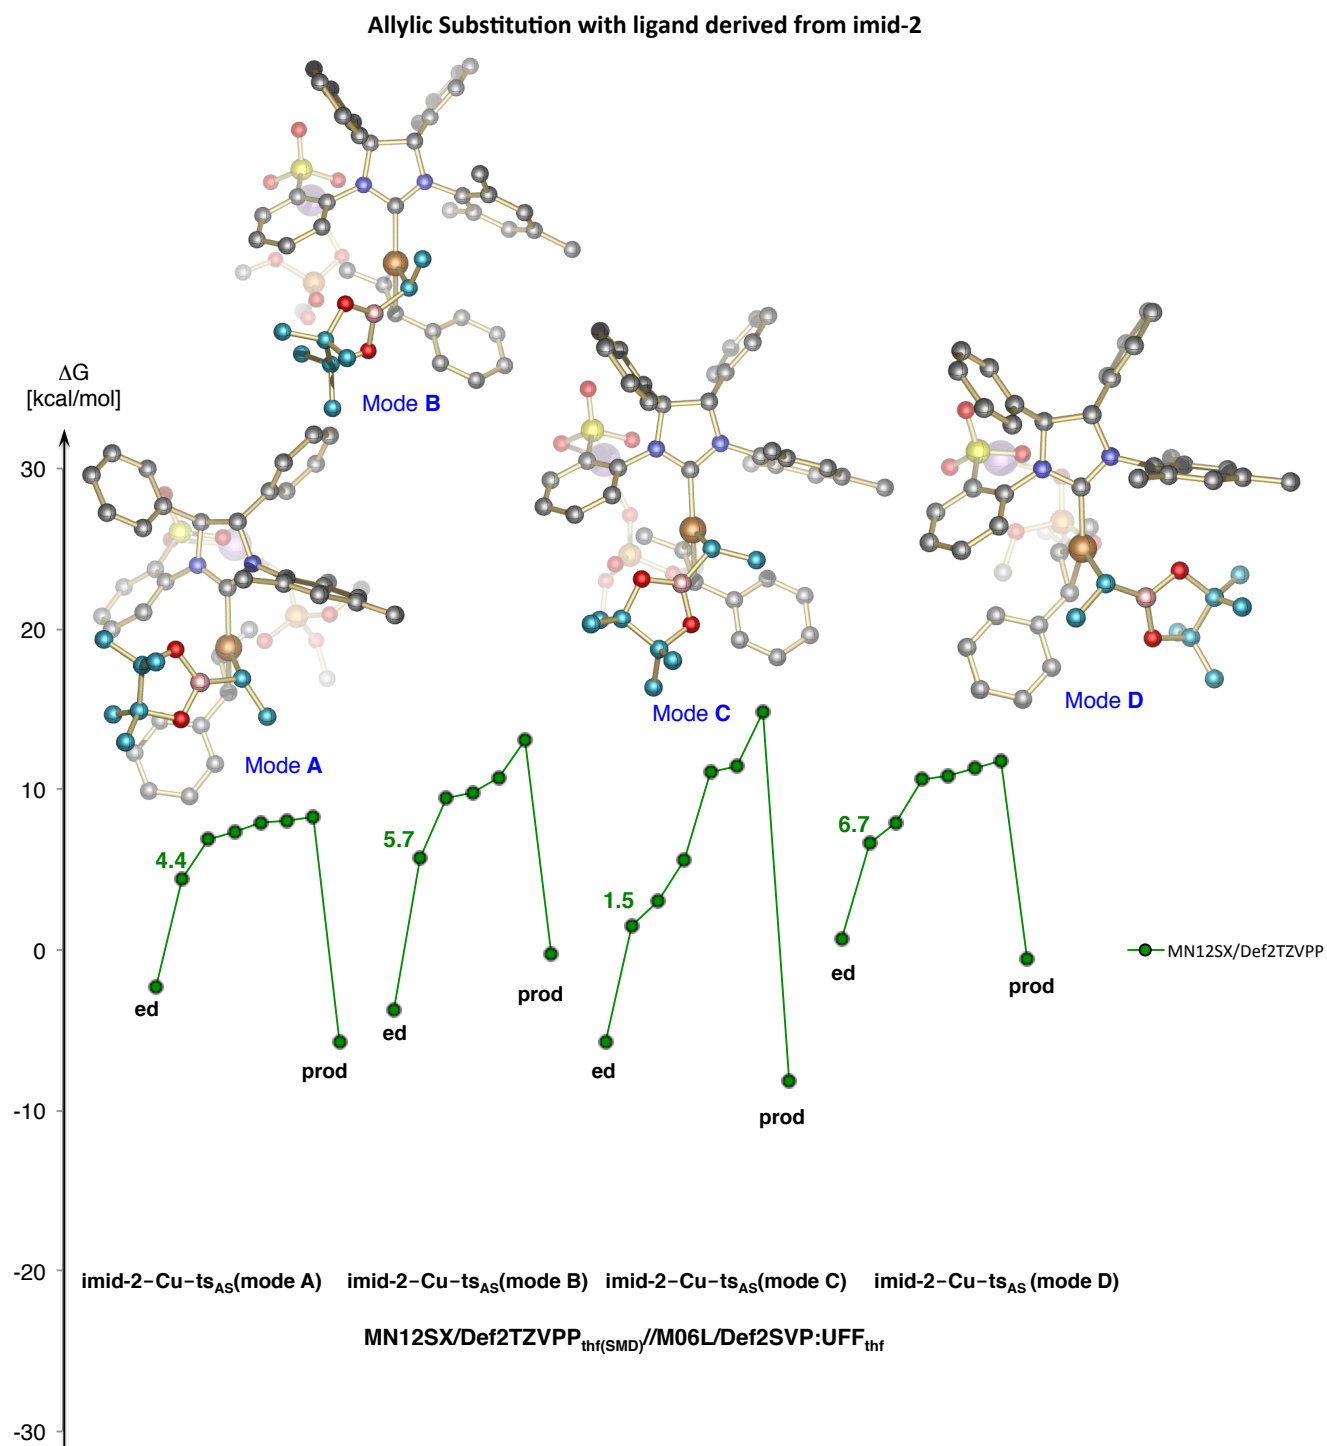

**Figure S9-1.** Free energy surfaces for allylic substitution (AS) with NHC ligand derived from **imid-2** at the MN12SX/Def2TZVPP<sub>THF(SMD)</sub>//M06L/Def2SVP:UFF<sub>THF</sub> level (all pathways **A**, **B**, **C** and **D** shown, including one **ed** and **prod** for each mode of addition).

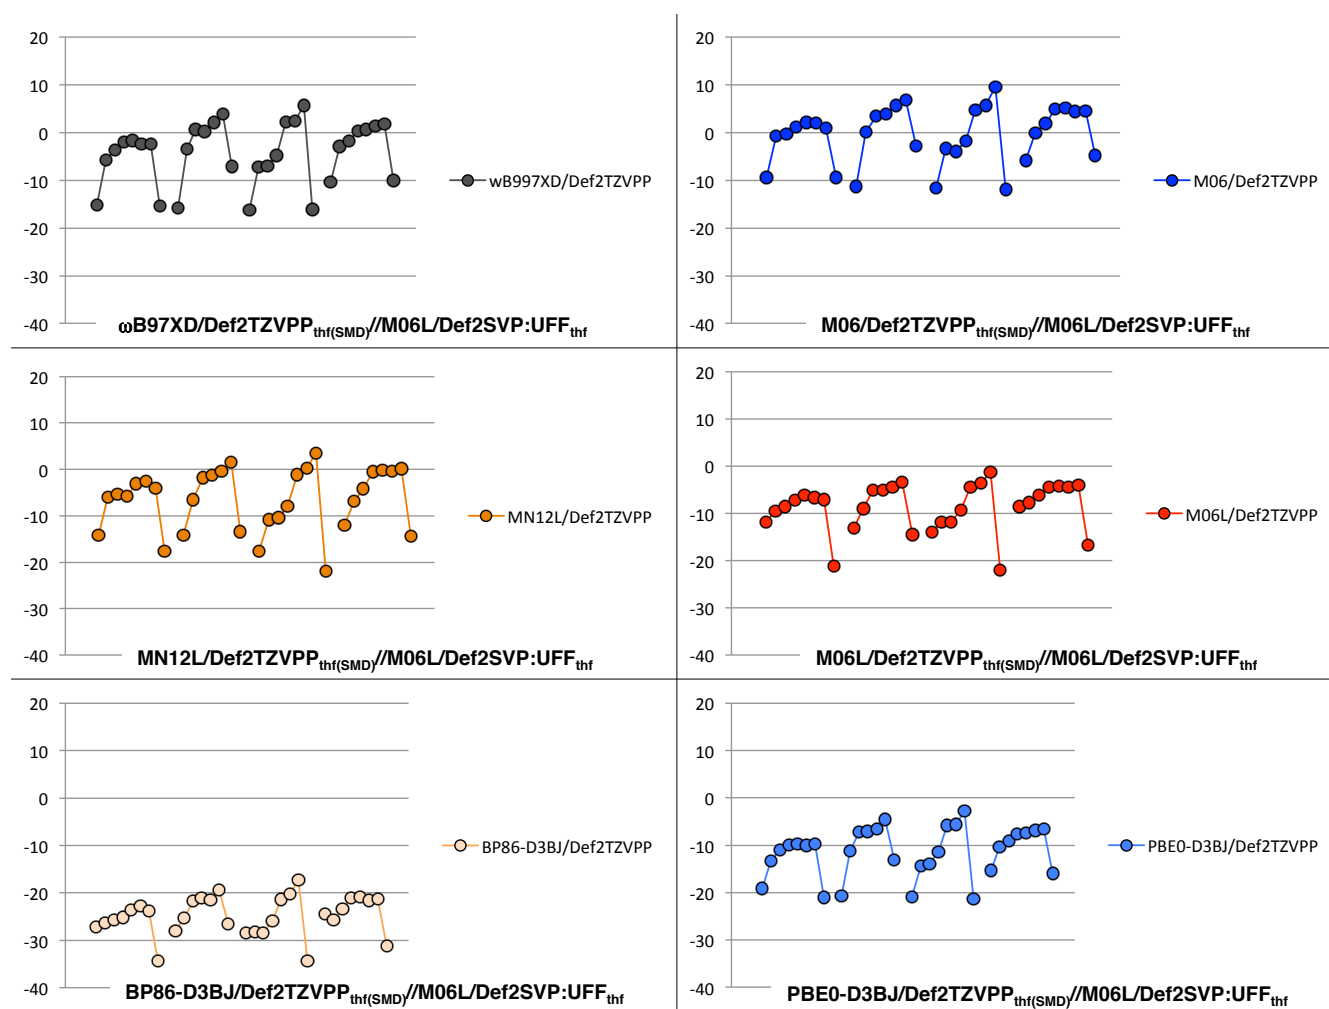

**Figure S9-2.** Free energy surfaces for allylic substitution (AS) with NHC ligand derived from **imid-2** with various density functionals after optimization with M06L/Def2SVP:UFF<sub>THF</sub> (all pathways **A**, **B**, **C** and **D** shown, including one **ed** and **prod** for each mode of addition; cf. Figure S9-1)

## ■ Energies and Gibbs Free Energies

### Optimization in Figure S4-1 with M06L/Def2SVP:UFF in THF

| structure                             | M06L/Def2SVP:UFF in THF |                          |                     |                          |                                        |                             |
|---------------------------------------|-------------------------|--------------------------|---------------------|--------------------------|----------------------------------------|-----------------------------|
|                                       | E(sum)<br>[hartree]     | $\Delta E$<br>[kcal/mol] | G(sum)<br>[hartree] | $\Delta G$<br>[kcal/mol] | $\Delta G_{\text{corr}}$<br>[kcal/mol] | Freq<br>[cm <sup>-1</sup> ] |
| Figure_S4_imid-3-Cu-H_01              | -3372.87604070          | 0.0                      | -3371.801994        | 0.0                      | 0.0                                    | 6.4                         |
| Figure_S4_imid-3-Cu-H_02              | -3372.87604072          | 0.0                      | -3371.801993        | 0.0                      | 0.0                                    | 6.4                         |
| Figure_S4_imid-3-Cu-H_03              | -3372.87648077          | -0.3                     | -3371.801495        | 0.3                      | 0.6                                    | 13.8                        |
| Figure_S4_imid-3_modeS1_ed(CuHadd)    | -3372.92134984          | -28.4                    | -3371.817018        | -9.4                     | 19.0                                   | 11.9                        |
| Figure_S4_imid-3_modeS1_ts(CuHadd)_01 | -3372.90750384          | -19.7                    | -3371.805433        | -2.2                     | 17.6                                   | -764.6                      |
| Figure_S4_imid-3_modeS1_ts(CuHadd)_02 | -3372.91008226          | -21.4                    | -3371.807454        | -3.4                     | 17.9                                   | -788.9                      |
| Figure_S4_imid-3_modeS1_prod(CuHadd)  | -3372.94563861          | -43.7                    | -3371.842069        | -25.1                    | 18.5                                   | 10.9                        |
| Figure_S4_imid-3_modeS2_ed(CuHadd)    | -3372.91713925          | -25.8                    | -3371.813870        | -7.5                     | 18.3                                   | 13.6                        |
| Figure_S4_imid-3_modeS2_ts(CuHadd)_01 | -3372.89612623          | -12.6                    | -3371.797742        | 2.7                      | 15.3                                   | -736.2                      |
| Figure_S4_imid-3_modeS2_ts(CuHadd)_02 | -3372.89780518          | -13.7                    | -3371.792077        | 6.2                      | 19.9                                   | -779.5                      |
| Figure_S4_imid-3_modeS2_prod(CuHadd)  | -3372.94310094          | -42.1                    | -3371.839636        | -23.6                    | 18.5                                   | 11.7                        |
| Figure_S4_imid-3_modeR1_ed(CuHadd)    | -3372.91815406          | -26.4                    | -3371.810018        | -5.0                     | 21.4                                   | 13.0                        |
| Figure_S4_imid-3_modeR1_ts(CuHadd)_01 | -3372.90096062          | -15.6                    | -3371.795685        | 4.0                      | 19.6                                   | -843.8                      |
| Figure_S4_imid-3_modeR1_ts(CuHadd)_02 | -3372.90095394          | -15.6                    | -3371.795444        | 4.1                      | 19.7                                   | -824.3                      |
| Figure_S4_imid-3_modeR1_ts(CuHadd)_03 | -3372.90075002          | -15.5                    | -3371.794146        | 4.9                      | 20.4                                   | -693.0                      |
| Figure_S4_imid-3_modeR1_prod(CuHadd)  | -3372.94544671          | -43.6                    | -3371.837078        | -22.0                    | 21.5                                   | 6.1                         |
| Figure_S4_imid-3_modeR2_ed(CuHadd)    | -3372.92183666          | -28.7                    | -3371.820055        | -11.3                    | 17.4                                   | 4.0                         |
| Figure_S4_imid-3_modeR2_ts(CuHadd)_01 | -3372.89617832          | -12.6                    | -3371.794160        | 4.9                      | 17.6                                   | -766.6                      |
| Figure_S4_imid-3_modeR2_ts(CuHadd)_02 | -3372.90217399          | -16.4                    | -3371.801482        | 0.3                      | 16.7                                   | -659.5                      |
| Figure_S4_imid-3_modeR2_prod(CuHadd)  | -3372.93517459          | -37.1                    | -3371.828484        | -16.6                    | 20.5                                   | 12.9                        |

E(sum) . electronic energy in hartree with M06L/Def2SVP:UFF after mass balance

G(sum) . sum of electronic and thermal free energies with M06L/Def2SVP:UFF after mass balance

$\Delta E$  ... relative electronic energy in kcal/mol with M06L/Def2SVP:UFF

$\Delta G$  ... relative free energy in kcal/mol with M06L/Def2SVP:UFF

$\Delta G_{\text{corr}}$  thermal correction to free energy in kcal/mol obtained with M06L/Def2SVP:UFF ( $\Delta G = \Delta E + \Delta G_{\text{corr}}$ )

Freq ... lowest frequency

## Optimization in Figure S5-1 with M06L/Def2SVP:UFF in THF

| structure                             | M06L/Def2SVP:UFF in THF |                          |                     |                          |                                        |                             |
|---------------------------------------|-------------------------|--------------------------|---------------------|--------------------------|----------------------------------------|-----------------------------|
|                                       | E(sum)<br>[hartree]     | $\Delta E$<br>[kcal/mol] | G(sum)<br>[hartree] | $\Delta G$<br>[kcal/mol] | $\Delta G_{\text{corr}}$<br>[kcal/mol] | Freq<br>[cm <sup>-1</sup> ] |
| Figure_S5_imid-3_modeS1_ed(CuHadd)    | -3372.96983691          | -58.9                    | -3371.824750        | -14.3                    | 44.6                                   | 7.1                         |
| Figure_S5_imid-3_modeS1_ts(CuHadd)_01 | -3372.95731868          | -51.0                    | -3371.812120        | -6.4                     | 44.6                                   | -746.1                      |
| Figure_S5_imid-3_modeS1_ts(CuHadd)_02 | -3372.95441057          | -49.2                    | -3371.809702        | -4.8                     | 44.3                                   | -772.9                      |
| Figure_S5_imid-3_modeS1_ts(CuHadd)_03 | -3372.95743357          | -51.1                    | -3371.809861        | -4.9                     | 46.1                                   | -768.5                      |
| Figure_S5_imid-3_modeS1_ts(CuHadd)_04 | -3372.95684576          | -50.7                    | -3371.809313        | -4.6                     | 46.1                                   | -755.6                      |
| Figure_S5_imid-3_modeS1_prod(CuHadd)  | -3372.99485508          | -74.6                    | -3371.845701        | -27.4                    | 47.1                                   | 7.9                         |
| Figure_S5_imid-3_modeS2_ed(CuHadd)    | -3372.96785239          | -57.6                    | -3371.819818        | -11.2                    | 46.4                                   | 11.2                        |
| Figure_S5_imid-3_modeS2_ts(CuHadd)_01 | -3372.94965474          | -46.2                    | -3371.804630        | -1.7                     | 44.5                                   | -769.5                      |
| Figure_S5_imid-3_modeS2_ts(CuHadd)_02 | -3372.94855407          | -45.5                    | -3371.800692        | 0.8                      | 46.3                                   | -714.5                      |
| Figure_S5_imid-3_modeS2_ts(CuHadd)_03 | -3372.94887049          | -45.7                    | -3371.798967        | 1.9                      | 47.6                                   | -756.6                      |
| Figure_S5_imid-3_modeS2_ts(CuHadd)_04 | -3372.94887049          | -45.7                    | -3371.798967        | 1.9                      | 47.6                                   | -756.5                      |
| Figure_S5_imid-3_modeS2_ts(CuHadd)_05 | -3372.95090653          | -47.0                    | -3371.803222        | -0.8                     | 46.2                                   | -635.7                      |
| Figure_S5_imid-3_modeS2_ts(CuHadd)_06 | -3372.94902570          | -45.8                    | -3371.800566        | 0.9                      | 46.7                                   | -742.2                      |
| Figure_S5_imid-3_modeS2_prod(CuHadd)  | -3372.99141382          | -72.4                    | -3371.834389        | -20.3                    | 52.1                                   | -53.6                       |
| Figure_S5_imid-3_modeR1_ed(CuHadd)    | -3372.96280021          | -54.4                    | -3371.811507        | -6.0                     | 48.5                                   | 9.7                         |
| Figure_S5_imid-3_modeR1_ts(CuHadd)_01 | -3372.94795883          | -45.1                    | -3371.797412        | 2.9                      | 48.0                                   | -747.2                      |
| Figure_S5_imid-3_modeR1_ts(CuHadd)_02 | -3372.94707794          | -44.6                    | -3371.797514        | 2.8                      | 47.4                                   | -740.2                      |
| Figure_S5_imid-3_modeR1_ts(CuHadd)_03 | -3372.94609965          | -44.0                    | -3371.793883        | 5.1                      | 49.1                                   | -756.9                      |
| Figure_S5_imid-3_modeR1_prod(CuHadd)  | -3372.98999087          | -71.5                    | -3371.834823        | -20.6                    | 50.9                                   | 13.8                        |
| Figure_S5_imid-3_modeR2_ed(CuHadd)    | -3372.96474072          | -55.7                    | -3371.811179        | -5.8                     | 49.9                                   | 15.6                        |
| Figure_S5_imid-3_modeR2_ts(CuHadd)_01 | -3372.95069423          | -46.8                    | -3371.800619        | 0.9                      | 47.7                                   | -778.2                      |
| Figure_S5_imid-3_modeR2_ts(CuHadd)_02 | -3372.94792114          | -45.1                    | -3371.797717        | 2.7                      | 47.8                                   | -758.4                      |
| Figure_S5_imid-3_modeR2_prod(CuHadd)  | -3372.99344822          | -73.7                    | -3371.839408        | -23.5                    | 50.2                                   | 15.4                        |

E(sum) . . . electronic energy in hartree with M06L/Def2SVP:UFF after mass balance

G(sum) . . . sum of electronic and thermal free energies with M06L/Def2SVP:UFF after mass balance

$\Delta E$  . . . relative electronic energy in kcal/mol with M06L/Def2SVP:UFF

$\Delta G$  . . . relative free energy in kcal/mol with M06L/Def2SVP:UFF

$\Delta G_{\text{corr}}$  . . . thermal correction to free energy in kcal/mol obtained with M06L/Def2SVP:UFF ( $\Delta G = \Delta E + \Delta G_{\text{corr}}$ )

Freq . . . lowest frequency

## Optimization in Figure S6-1 with M06L/Def2SVP:UFF in THF

| structure                             | M06L/Def2SVP:UFF in THF |                          |                     |                          |                                        |                             |
|---------------------------------------|-------------------------|--------------------------|---------------------|--------------------------|----------------------------------------|-----------------------------|
|                                       | E(sum)<br>[hartree]     | $\Delta E$<br>[kcal/mol] | G(sum)<br>[hartree] | $\Delta G$<br>[kcal/mol] | $\Delta G_{\text{corr}}$<br>[kcal/mol] | Freq<br>[cm <sup>-1</sup> ] |
| Figure_S6_imid-3_modeS1_ed(CuHadd)    | -3372.98714806          | -69.7                    | -3371.812933        | -6.9                     | 62.9                                   | 11.5                        |
| Figure_S6_imid-3_modeS1_ts(CuHadd)_01 | -3372.97105366          | -59.6                    | -3371.798094        | 2.4                      | 62.1                                   | -771.3                      |
| Figure_S6_imid-3_modeS1_ts(CuHadd)_02 | -3372.96872652          | -58.2                    | -3371.796391        | 3.5                      | 61.7                                   | -745.5                      |
| Figure_S6_imid-3_modeS1_ts(CuHadd)_03 | -3372.97189669          | -60.2                    | -3371.798564        | 2.2                      | 62.3                                   | -744.2                      |
| Figure_S6_imid-3_modeS1_ts(CuHadd)_04 | -3372.97187659          | -60.1                    | -3371.797372        | 2.9                      | 63.0                                   | -759.1                      |
| Figure_S6_imid-3_modeS1_ts(CuHadd)_05 | -3372.95756504          | -51.2                    | -3371.795935        | 3.8                      | 55.0                                   | -675.0                      |
| Figure_S6_imid-3_modeS1_ts(CuHadd)_06 | -3372.96535034          | -56.0                    | -3371.793440        | 5.4                      | 61.4                                   | -759.3                      |
| Figure_S6_imid-3_modeS1_prod(CuHadd)  | -3373.00820663          | -82.9                    | -3371.829477        | -17.2                    | 65.7                                   | 8.0                         |
| Figure_S6_imid-3_modeS2_ed(CuHadd)    | -3372.98795076          | -70.2                    | -3371.812327        | -6.5                     | 63.7                                   | 14.9                        |
| Figure_S6_imid-3_modeS2_ts(CuHadd)_01 | -3372.97248273          | -60.5                    | -3371.802731        | -0.5                     | 60.1                                   | -697.0                      |
| Figure_S6_imid-3_modeS2_ts(CuHadd)_02 | -3372.97452925          | -61.8                    | -3371.802671        | -0.4                     | 61.4                                   | -684.8                      |
| Figure_S6_imid-3_modeS2_ts(CuHadd)_03 | -3372.97308258          | -60.9                    | -3371.802807        | -0.5                     | 60.4                                   | -639.9                      |
| Figure_S6_imid-3_modeS2_ts(CuHadd)_04 | -3372.97274485          | -60.7                    | -3371.800939        | 0.7                      | 61.3                                   | -703.6                      |
| Figure_S6_imid-3_modeS2_ts(CuHadd)_05 | -3372.97287149          | -60.8                    | -3371.800618        | 0.9                      | 61.6                                   | -736.0                      |
| Figure_S6_imid-3_modeS2_ts(CuHadd)_06 | -3372.96215852          | -54.0                    | -3371.791787        | 6.4                      | 60.4                                   | -668.7                      |
| Figure_S6_imid-3_modeS2_ts(CuHadd)_07 | -3372.96784920          | -57.6                    | -3371.797960        | 2.5                      | 60.1                                   | -591.3                      |
| Figure_S6_imid-3_modeS2_prod(CuHadd)  | -3373.02006953          | -90.4                    | -3371.841768        | -25.0                    | 65.4                                   | 15.9                        |
| Figure_S6_imid-3_modeR1_ed(CuHadd)    | -3372.98019796          | -65.4                    | -3371.805303        | -2.1                     | 63.3                                   | 12.7                        |
| Figure_S6_imid-3_modeR1_ts(CuHadd)_01 | -3372.96279015          | -54.4                    | -3371.789314        | 8.0                      | 62.4                                   | -707.7                      |
| Figure_S6_imid-3_modeR1_ts(CuHadd)_02 | -3372.96494953          | -55.8                    | -3371.790600        | 7.1                      | 62.9                                   | -688.9                      |
| Figure_S6_imid-3_modeR1_ts(CuHadd)_03 | -3372.96084190          | -53.2                    | -3371.788960        | 8.2                      | 61.4                                   | -758.5                      |
| Figure_S6_imid-3_modeR1_prod(CuHadd)  | -3373.01344700          | -86.2                    | -3371.838634        | -23.0                    | 63.2                                   | 12.3                        |
| Figure_S6_imid-3_modeR2_ed(CuHadd)    | -3372.98864943          | -70.7                    | -3371.809261        | -4.6                     | 66.1                                   | 16.3                        |
| Figure_S6_imid-3_modeR2_ts(CuHadd)_01 | -3372.97410523          | -61.5                    | -3371.800273        | 1.1                      | 62.6                                   | -754.1                      |
| Figure_S6_imid-3_modeR2_ts(CuHadd)_02 | -3372.97127491          | -59.8                    | -3371.797599        | 2.8                      | 62.5                                   | -764.5                      |
| Figure_S6_imid-3_modeR2_ts(CuHadd)_03 | -3372.97355227          | -61.2                    | -3371.800637        | 0.9                      | 62.0                                   | -733.8                      |
| Figure_S6_imid-3_modeR2_ts(CuHadd)_04 | -3372.97327826          | -61.0                    | -3371.799712        | 1.4                      | 62.4                                   | -727.1                      |
| Figure_S6_imid-3_modeR2_prod(CuHadd)  | -3373.01571161          | -87.6                    | -3371.838321        | -22.8                    | 64.8                                   | 17.1                        |

E(sum) . electronic energy in hartree with M06L/Def2SVP:UFF after mass balance

G(sum) . sum of electronic and thermal free energies with M06L/Def2SVP:UFF after mass balance

$\Delta E$  ... relative electronic energy in kcal/mol with M06L/Def2SVP:UFF

$\Delta G$  ... relative free energy in kcal/mol with M06L/Def2SVP:UFF

$\Delta G_{\text{corr}}$  thermal correction to free energy in kcal/mol obtained with M06L/Def2SVP:UFF ( $\Delta G = \Delta E + \Delta G_{\text{corr}}$ )

Freq ... lowest frequency

## Optimization in Figure S7-1 with M06L/Def2SVP:UFF in THF

| structure                        | M06L/Def2SVP:UFF in THF |                          |                     |                          |                                        |                             |
|----------------------------------|-------------------------|--------------------------|---------------------|--------------------------|----------------------------------------|-----------------------------|
|                                  | E(sum)<br>[hartree]     | $\Delta E$<br>[kcal/mol] | G(sum)<br>[hartree] | $\Delta G$<br>[kcal/mol] | $\Delta G_{\text{corr}}$<br>[kcal/mol] | Freq<br>[cm <sup>-1</sup> ] |
| Figure_S7_imid-3_modeA_ed(AS)    | -3372.99177203          | -72.6                    | -3371.852923        | -32.0                    | 40.7                                   | 14.0                        |
| Figure_S7_imid-3_modeA_ts(AS)_01 | -3372.97722854          | -63.5                    | -3371.842482        | -25.4                    | 38.1                                   | -257.3                      |
| Figure_S7_imid-3_modeA_ts(AS)_02 | -3372.97943620          | -64.9                    | -3371.844368        | -26.6                    | 38.3                                   | -262.8                      |
| Figure_S7_imid-3_modeA_ts(AS)_03 | -3372.97768242          | -63.8                    | -3371.839196        | -23.3                    | 40.4                                   | -178.3                      |
| Figure_S7_imid-3_modeA_ts(AS)_04 | -3372.97591088          | -62.7                    | -3371.837131        | -22.0                    | 40.6                                   | -265.0                      |
| Figure_S7_imid-3_modeA_ts(AS)_05 | -3372.97336700          | -61.1                    | -3371.834971        | -20.7                    | 40.4                                   | -255.6                      |
| Figure_S7_imid-3_modeA_ts(AS)_06 | -3372.96940761          | -58.6                    | -3371.829779        | -17.4                    | 41.2                                   | -260.5                      |
| Figure_S7_imid-3_modeA_prod(AS)  | -3372.98772048          | -70.1                    | -3371.853773        | -32.5                    | 37.6                                   | 11.3                        |
| Figure_S7_imid-3_modeB_ed(AS)    | -3372.98797496          | -70.2                    | -3371.848116        | -28.9                    | 41.3                                   | 17.8                        |
| Figure_S7_imid-3_modeB_ts(AS)_01 | -3372.97437306          | -61.7                    | -3371.838078        | -22.6                    | 39.1                                   | -268.4                      |
| Figure_S7_imid-3_modeB_ts(AS)_02 | -3372.97024971          | -59.1                    | -3371.831245        | -18.4                    | 40.8                                   | -273.5                      |
| Figure_S7_imid-3_modeB_ts(AS)_03 | -3372.96769186          | -57.5                    | -3371.826211        | -15.2                    | 42.3                                   | -229.9                      |
| Figure_S7_imid-3_modeB_ts(AS)_04 | -3372.96529896          | -56.0                    | -3371.822632        | -13.0                    | 43.1                                   | -260.2                      |
| Figure_S7_imid-3_modeB_ts(AS)_05 | -3372.96535873          | -56.0                    | -3371.826363        | -15.3                    | 40.8                                   | -253.8                      |
| Figure_S7_imid-3_modeB_ts(AS)_06 | -3372.96535888          | -56.0                    | -3371.826362        | -15.3                    | 40.8                                   | -253.8                      |
| Figure_S7_imid-3_modeB_prod(AS)  | -3372.98442740          | -68.0                    | -3371.847842        | -28.8                    | 39.2                                   | 17.1                        |
| Figure_S7_imid-3_modeC_ed(AS)    | -3372.98850883          | -70.6                    | -3371.850057        | -30.2                    | 40.4                                   | 15.1                        |
| Figure_S7_imid-3_modeC_ts(AS)_01 | -3372.97470009          | -61.9                    | -3371.839481        | -23.5                    | 38.4                                   | -264.9                      |
| Figure_S7_imid-3_modeC_ts(AS)_02 | -3372.97092575          | -59.5                    | -3371.833855        | -20.0                    | 39.5                                   | -279.7                      |
| Figure_S7_imid-3_modeC_ts(AS)_03 | -3372.96857306          | -58.1                    | -3371.835302        | -20.9                    | 37.2                                   | -266.3                      |
| Figure_S7_imid-3_modeC_ts(AS)_04 | -3372.97545969          | -62.4                    | -3371.837262        | -22.1                    | 40.3                                   | -272.3                      |
| Figure_S7_imid-3_modeC_ts(AS)_05 | -3372.97394834          | -61.4                    | -3371.836163        | -21.4                    | 40.0                                   | -266.7                      |
| Figure_S7_imid-3_modeC_ts(AS)_06 | -3372.97024299          | -59.1                    | -3371.830962        | -18.2                    | 40.9                                   | -278.3                      |
| Figure_S7_imid-3_modeC_prod(AS)  | -3372.98335742          | -67.3                    | -3371.846253        | -27.8                    | 39.6                                   | 17.4                        |
| Figure_S7_imid-3_modeD_ed(AS)    | -3372.98897190          | -70.9                    | -3371.848982        | -29.5                    | 41.4                                   | 12.4                        |
| Figure_S7_imid-3_modeD_ts(AS)_01 | -3372.97572877          | -62.6                    | -3371.840756        | -24.3                    | 38.2                                   | -259.2                      |
| Figure_S7_imid-3_modeD_ts(AS)_02 | -3372.97692514          | -63.3                    | -3371.840767        | -24.3                    | 39.0                                   | -275.8                      |
| Figure_S7_imid-3_modeD_ts(AS)_03 | -3372.98320274          | -67.2                    | -3371.843558        | -26.1                    | 41.2                                   | -273.1                      |
| Figure_S7_imid-3_modeD_ts(AS)_04 | -3372.97873553          | -64.4                    | -3371.837227        | -22.1                    | 42.3                                   | -270.7                      |
| Figure_S7_imid-3_modeD_ts(AS)_05 | -3372.97501365          | -62.1                    | -3371.838720        | -23.0                    | 39.1                                   | -217.0                      |
| Figure_S7_imid-3_modeD_ts(AS)_06 | -3372.97091627          | -59.5                    | -3371.830554        | -17.9                    | 41.6                                   | -246.6                      |
| Figure_S7_imid-3_modeD_prod(AS)  | -3372.98661582          | -69.4                    | -3371.850909        | -30.7                    | 38.7                                   | 10.9                        |

E(sum) . electronic energy in hartree with M06L/Def2SVP:UFF after mass balance

G(sum) . sum of electronic and thermal free energies with M06L/Def2SVP:UFF after mass balance

 $\Delta E$  ... relative electronic energy in kcal/mol with M06L/Def2SVP:UFF $\Delta G$  ... relative free energy in kcal/mol with M06L/Def2SVP:UFF $\Delta G_{\text{corr}}$  thermal correction to free energy in kcal/mol obtained with M06L/Def2SVP:UFF ( $\Delta G = \Delta E + \Delta G_{\text{corr}}$ )

Freq ... lowest frequency



## Optimization in Figure S8-1 with M06L/Def2SVP:UFF in THF

| structure                            | M06L/Def2SVP:UFF in THF |                          |                     |                          |                                        |                             |
|--------------------------------------|-------------------------|--------------------------|---------------------|--------------------------|----------------------------------------|-----------------------------|
|                                      | E(sum)<br>[hartree]     | $\Delta E$<br>[kcal/mol] | G(sum)<br>[hartree] | $\Delta G$<br>[kcal/mol] | $\Delta G_{\text{corr}}$<br>[kcal/mol] | Freq<br>[cm <sup>-1</sup> ] |
| Figure_S8_imid-2-Cu-H                | -3372.94728108          | 0.0                      | -3372.286789        | 0.0                      | 0.0                                    | 26.4                        |
| Figure_S8_imid-2_modeS1_ed(CuHadd)   | -3372.98529559          | -23.9                    | -3372.295676        | -5.6                     | 18.3                                   | 19.8                        |
| Figure_S8_imid-2_modeS1_ts(CuHadd)   | -3372.97337225          | -16.4                    | -3372.286669        | 0.1                      | 16.4                                   | -704.0                      |
| Figure_S8_imid-2_modeS1_prod(CuHadd) | -3373.01685232          | -43.7                    | -3372.327143        | -25.3                    | 18.3                                   | 16.5                        |
| Figure_S8_imid-2_modeS2_ed(CuHadd)   | -3372.98629061          | -24.5                    | -3372.299901        | -8.2                     | 16.3                                   | 19.7                        |
| Figure_S8_imid-2_modeS2_ts(CuHadd)   | -3372.96595014          | -11.7                    | -3372.281787        | 3.1                      | 14.9                                   | -778.0                      |
| Figure_S8_imid-2_modeS2_prod(CuHadd) | -3373.00940304          | -39.0                    | -3372.322528        | -22.4                    | 16.6                                   | 15.0                        |
| Figure_S8_imid-2_modeR1_ed(CuHadd)   | -3372.98177770          | -21.6                    | -3372.290055        | -2.0                     | 19.6                                   | 19.4                        |
| Figure_S8_imid-2_modeR1_ts(CuHadd)   | -3372.96598463          | -11.7                    | -3372.278183        | 5.4                      | 17.1                                   | -740.1                      |
| Figure_S8_imid-2_modeR1_prod(CuHadd) | -3373.01751384          | -44.1                    | -3372.325868        | -24.5                    | 19.5                                   | 20.3                        |
| Figure_S8_imid-2_modeR2_ed(CuHadd)   | -3372.98152932          | -21.5                    | -3372.297081        | -6.5                     | 15.0                                   | 17.4                        |
| Figure_S8_imid-2_modeR2_ts(CuHadd)   | -3372.96517948          | -11.2                    | -3372.282077        | 3.0                      | 14.2                                   | -710.2                      |
| Figure_S8_imid-2_modeR2_prod(CuHadd) | -3373.00912849          | -38.8                    | -3372.323251        | -22.9                    | 15.9                                   | 15.6                        |

E(sum) . electronic energy in hartree with M06L/Def2SVP:UFF after mass balance

G(sum) . sum of electronic and thermal free energies with M06L/Def2SVP:UFF after mass balance

$\Delta E$  ... relative electronic energy in kcal/mol with M06L/Def2SVP:UFF

$\Delta G$  ... relative free energy in kcal/mol with M06L/Def2SVP:UFF

$\Delta G_{\text{corr}}$  thermal correction to free energy in kcal/mol obtained with M06L/Def2SVP:UFF ( $\Delta G = \Delta E + \Delta G_{\text{corr}}$ )

Freq ... lowest frequency

## Optimization in Figure S9-1 with M06L/Def2SVP:UFF in THF

| structure                        | M06L/Def2SVP:UFF in THF |                          |                     |                          |                                        |                             |
|----------------------------------|-------------------------|--------------------------|---------------------|--------------------------|----------------------------------------|-----------------------------|
|                                  | E(sum)<br>[hartree]     | $\Delta E$<br>[kcal/mol] | G(sum)<br>[hartree] | $\Delta G$<br>[kcal/mol] | $\Delta G_{\text{corr}}$<br>[kcal/mol] | Freq<br>[cm <sup>-1</sup> ] |
| Figure_S9_imid-2_modeA_ed(AS)    | -3373.05577416          | -68.1                    | -3372.333077        | -29.0                    | 39.0                                   | -7.0                        |
| Figure_S9_imid-2_modeA_ts(AS)_01 | -3373.04236717          | -59.7                    | -3372.325870        | -24.5                    | 35.1                                   | -256.8                      |
| Figure_S9_imid-2_modeA_ts(AS)_02 | -3373.04350747          | -60.4                    | -3372.322609        | -22.5                    | 37.9                                   | -238.2                      |
| Figure_S9_imid-2_modeA_ts(AS)_03 | -3373.04282244          | -60.0                    | -3372.322037        | -22.1                    | 37.8                                   | -239.1                      |
| Figure_S9_imid-2_modeA_ts(AS)_04 | -3373.04211773          | -59.5                    | -3372.323485        | -23.0                    | 36.5                                   | -253.2                      |
| Figure_S9_imid-2_modeA_ts(AS)_05 | -3373.03951562          | -57.9                    | -3372.319903        | -20.8                    | 37.1                                   | -254.6                      |
| Figure_S9_imid-2_modeA_ts(AS)_06 | -3373.04075075          | -58.7                    | -3372.318540        | -19.9                    | 38.7                                   | -237.8                      |
| Figure_S9_imid-2_modeA_prod(AS)  | -3373.05268811          | -66.1                    | -3372.334750        | -30.1                    | 36.0                                   | 10.6                        |
| Figure_S9_imid-2_modeB_ed(AS)    | -3373.05031071          | -64.7                    | -3372.331306        | -27.9                    | 36.7                                   | 15.9                        |
| Figure_S9_imid-2_modeB_ts(AS)_01 | -3373.03616694          | -55.8                    | -3372.318918        | -20.2                    | 35.6                                   | -220.8                      |
| Figure_S9_imid-2_modeB_ts(AS)_02 | -3373.03927418          | -57.7                    | -3372.319290        | -20.4                    | 37.3                                   | -251.1                      |
| Figure_S9_imid-2_modeB_ts(AS)_03 | -3373.04153325          | -59.1                    | -3372.322171        | -22.2                    | 36.9                                   | -267.6                      |
| Figure_S9_imid-2_modeB_ts(AS)_04 | -3373.03662678          | -56.1                    | -3372.316049        | -18.4                    | 37.7                                   | -234.0                      |
| Figure_S9_imid-2_modeB_ts(AS)_05 | -3373.04013757          | -58.3                    | -3372.318263        | -19.8                    | 38.5                                   | -188.3                      |
| Figure_S9_imid-2_modeB_prod(AS)  | -3373.04693774          | -62.5                    | -3372.326930        | -25.2                    | 37.3                                   | 16.0                        |
| Figure_S9_imid-2_modeC_ed(AS)    | -3373.05670770          | -68.7                    | -3372.335213        | -30.4                    | 38.3                                   | 15.8                        |
| Figure_S9_imid-2_modeC_ts(AS)_01 | -3373.04232375          | -59.6                    | -3372.326187        | -24.7                    | 34.9                                   | -218.5                      |
| Figure_S9_imid-2_modeC_ts(AS)_02 | -3373.04306643          | -60.1                    | -3372.324855        | -23.9                    | 36.2                                   | -249.7                      |
| Figure_S9_imid-2_modeC_ts(AS)_03 | -3373.04323129          | -60.2                    | -3372.321732        | -21.9                    | 38.3                                   | -237.1                      |
| Figure_S9_imid-2_modeC_ts(AS)_04 | -3373.03388548          | -54.3                    | -3372.314883        | -17.6                    | 36.7                                   | -226.8                      |
| Figure_S9_imid-2_modeC_ts(AS)_05 | -3373.03470396          | -54.9                    | -3372.316610        | -18.7                    | 36.1                                   | -206.1                      |
| Figure_S9_imid-2_modeC_ts(AS)_06 | -3373.03413600          | -54.5                    | -3372.313809        | -17.0                    | 37.5                                   | -226.5                      |
| Figure_S9_imid-2_modeC_prod(AS)  | -3373.05244613          | -66.0                    | -3372.332970        | -29.0                    | 37.0                                   | -8.9                        |
| Figure_S9_imid-2_modeD_ed(AS)    | -3373.05975930          | -70.6                    | -3372.334884        | -30.2                    | 40.4                                   | -8.4                        |
| Figure_S9_imid-2_modeD_ts(AS)_01 | -3373.04766133          | -63.0                    | -3372.329248        | -26.6                    | 36.3                                   | -255.5                      |
| Figure_S9_imid-2_modeD_ts(AS)_02 | -3373.04766477          | -63.0                    | -3372.327501        | -25.5                    | 37.4                                   | -265.7                      |
| Figure_S9_imid-2_modeD_ts(AS)_03 | -3373.03925149          | -57.7                    | -3372.320304        | -21.0                    | 36.7                                   | -260.3                      |
| Figure_S9_imid-2_modeD_ts(AS)_04 | -3373.03926580          | -57.7                    | -3372.319991        | -20.8                    | 36.9                                   | -259.9                      |
| Figure_S9_imid-2_modeD_ts(AS)_05 | -3373.03918846          | -57.7                    | -3372.318375        | -19.8                    | 37.9                                   | -260.1                      |
| Figure_S9_imid-2_modeD_ts(AS)_06 | -3373.03914741          | -57.6                    | -3372.317884        | -19.5                    | 38.1                                   | -264.3                      |
| Figure_S9_imid-2_modeD_prod(AS)  | -3373.05877766          | -70.0                    | -3372.337640        | -31.9                    | 38.1                                   | 20.3                        |

E(sum) . electronic energy in hartree with M06L/Def2SVP:UFF after mass balance

G(sum) . sum of electronic and thermal free energies with M06L/Def2SVP:UFF after mass balance

 $\Delta E$  ... relative electronic energy in kcal/mol with M06L/Def2SVP:UFF $\Delta G$  ... relative free energy in kcal/mol with M06L/Def2SVP:UFF $\Delta G_{\text{corr}}$  thermal correction to free energy in kcal/mol obtained with M06L/Def2SVP:UFF ( $\Delta G = \Delta E + \Delta G_{\text{corr}}$ )

Freq ... lowest frequency

Single point energies in Figure S4-1 with M06,  $\omega$ B97XD and MN12SX

| $\omega$ B97XD/Def2TZVPP thf(SMD) |                               |                               | M06/Def2TZVPP thf(SMD) |                               |                               | MN12SX/Def2TZVPP thf(SMD) |                               |                               |
|-----------------------------------|-------------------------------|-------------------------------|------------------------|-------------------------------|-------------------------------|---------------------------|-------------------------------|-------------------------------|
| $E_{sp}$<br>[hartree]             | $\Delta E_{sp}$<br>[kcal/mol] | $\Delta G_{sp}$<br>[kcal/mol] | $E_{sp}$<br>[hartree]  | $\Delta E_{sp}$<br>[kcal/mol] | $\Delta G_{sp}$<br>[kcal/mol] | $E_{sp}$<br>[hartree]     | $\Delta E_{sp}$<br>[kcal/mol] | $\Delta G_{sp}$<br>[kcal/mol] |
| -5001.82121551                    | 0.0                           | 0.00                          | -5000.53870244         | 0.0                           | 0.00                          | -5000.05232062            | 0.0                           | 0.00                          |
| -5001.82121555                    | 0.0                           | 0.00                          | -5000.53870255         | 0.0                           | 0.00                          | -5000.05232071            | 0.0                           | 0.00                          |
| -5001.82098875                    | 0.1                           | 0.73                          | -5000.53892004         | -0.1                          | 0.45                          | -5000.05261586            | -0.2                          | 0.40                          |
| -5001.85420131                    | -20.7                         | -1.69                         | -5000.56615354         | -17.2                         | 1.78                          | -5000.07565975            | -14.6                         | 4.36                          |
| -5001.84235753                    | -13.3                         | 4.32                          | -5000.55588917         | -10.8                         | 6.80                          | -5000.06502681            | -8.0                          | 9.61                          |
| -5001.83826060                    | -10.7                         | 7.24                          | -5000.55207254         | -8.4                          | 9.55                          | -5000.06094247            | -5.4                          | 12.52                         |
| -5001.88654787                    | -41.0                         | -22.47                        | -5000.60060473         | -38.8                         | -20.32                        | -5000.10641699            | -33.9                         | -15.42                        |
| -5001.84739895                    | -16.4                         | 1.91                          | -5000.55843620         | -12.4                         | 5.95                          | -5000.06785505            | -9.7                          | 8.59                          |
| -5001.82025552                    | 0.6                           | 15.87                         | -5000.53546938         | 2.0                           | 17.30                         | -5000.04472667            | 4.8                           | 20.04                         |
| -5001.82042276                    | 0.5                           | 20.38                         | -5000.53365008         | 3.2                           | 23.05                         | -5000.04235609            | 6.3                           | 26.13                         |
| -5001.86551949                    | -27.8                         | -9.34                         | -5000.58187843         | -27.1                         | -8.63                         | -5000.08776603            | -22.2                         | -3.78                         |
| -5001.84396144                    | -14.3                         | 7.12                          | -5000.55493224         | -10.2                         | 11.21                         | -5000.06340609            | -7.0                          | 14.44                         |
| -5001.83100260                    | -6.1                          | 13.45                         | -5000.54430496         | -3.5                          | 16.08                         | -5000.05125485            | 0.7                           | 20.27                         |
| -5001.83064705                    | -5.9                          | 13.83                         | -5000.54412501         | -3.4                          | 16.34                         | -5000.05102277            | 0.8                           | 20.56                         |
| -5001.82777988                    | -4.1                          | 16.31                         | -5000.54116291         | -1.5                          | 18.89                         | -5000.05010490            | 1.4                           | 21.82                         |
| -5001.88776926                    | -41.8                         | -20.23                        | -5000.60191567         | -39.7                         | -18.13                        | -5000.10487202            | -33.0                         | -11.44                        |
| -5001.85069729                    | -18.5                         | -1.10                         | -5000.56285576         | -15.2                         | 2.25                          | -5000.07210990            | -12.4                         | 4.99                          |
| -5001.82468955                    | -2.2                          | 15.37                         | -5000.53845200         | 0.2                           | 17.71                         | -5000.04845940            | 2.4                           | 19.98                         |
| -5001.82054702                    | 0.4                           | 17.14                         | -5000.53623012         | 1.6                           | 18.27                         | -5000.04537794            | 4.4                           | 21.08                         |
| -5001.86435892                    | -27.1                         | -6.59                         | -5000.57709700         | -24.1                         | -3.61                         | -5000.08238668            | -18.9                         | 1.62                          |

$E_{sp}$  ..... single point electronic energy in thf (SMD) in hartree with Def2TZVPP after mass balance

$\Delta E_{sp}$  ... relative single point electronic energy in thf(SMD) in kcal/mol with Def2TZVPP

$\Delta G_{sp}$  ... relative single point free energy in thf(SMD) in kcal/mol ( $\Delta G_{sp} = \Delta E_{sp}/\text{Def2TZVPP} + \Delta G_{\text{corr}}$ [level of optimization])

## Single point energies in Figure S4-1 with MN12L and M06L

| MN12L/Def2TZVPP thf(SMD) |                               |                               | M06L/Def2TZVPP thf(SMD) |                               |                               |  |
|--------------------------|-------------------------------|-------------------------------|-------------------------|-------------------------------|-------------------------------|--|
| $E_{sp}$<br>[hartree]    | $\Delta E_{sp}$<br>[kcal/mol] | $\Delta G_{sp}$<br>[kcal/mol] | $E_{sp}$<br>[hartree]   | $\Delta E_{sp}$<br>[kcal/mol] | $\Delta G_{sp}$<br>[kcal/mol] |  |
| -4999.36375350           | 0.0                           | 0.00                          | -5002.20546124          | 0.0                           | 0.00                          |  |
| -4999.36375360           | 0.0                           | 0.00                          | -5002.20546135          | 0.0                           | 0.00                          |  |
| -4999.36571598           | -1.2                          | -0.64                         | -5002.20674708          | -0.8                          | -0.22                         |  |
| -4999.40113075           | -23.5                         | -4.45                         | -5002.24055608          | -22.0                         | -3.02                         |  |
| -4999.38614054           | -14.0                         | 3.54                          | -5002.22668371          | -13.3                         | 4.27                          |  |
| -4999.38537478           | -13.6                         | 4.37                          | -5002.22341690          | -11.3                         | 6.67                          |  |
| -4999.41932121           | -34.9                         | -16.34                        | -5002.26353003          | -36.4                         | -17.91                        |  |
| -4999.39152843           | -17.4                         | 0.91                          | -5002.23349172          | -17.6                         | 0.75                          |  |
| -4999.36451058           | -0.5                          | 14.80                         | -5002.20552764          | 0.0                           | 15.23                         |  |
| -4999.36841543           | -2.9                          | 16.96                         | -5002.20344110          | 1.3                           | 21.15                         |  |
| -4999.40307283           | -24.7                         | -6.21                         | -5002.24802840          | -26.7                         | -8.25                         |  |
| -4999.39112388           | -17.2                         | 4.22                          | -5002.22912291          | -14.8                         | 6.54                          |  |
| -4999.37451967           | -6.8                          | 12.84                         | -5002.21323276          | -4.9                          | 14.72                         |  |
| -4999.37468867           | -6.9                          | 12.88                         | -5002.21312903          | -4.8                          | 14.93                         |  |
| -4999.37670889           | -8.1                          | 12.30                         | -5002.21255861          | -4.5                          | 15.98                         |  |
| -4999.42074872           | -35.8                         | -14.23                        | -5002.26380660          | -36.6                         | -15.07                        |  |
| -4999.40175916           | -23.8                         | -6.44                         | -5002.23558096          | -18.9                         | -1.50                         |  |
| -4999.37212158           | -5.3                          | 12.30                         | -5002.20666361          | -0.8                          | 16.80                         |  |
| -4999.36925353           | -3.5                          | 13.27                         | -5002.20858968          | -2.0                          | 14.76                         |  |
| -4999.40025537           | -22.9                         | -2.42                         | -5002.24021261          | -21.8                         | -1.32                         |  |

$E_{sp}$  ..... single point electronic energy in thf (SMD) in hartree with Def2TZVPP after mass balance

$\Delta E_{sp}$  ... relative single point electronic energy in thf(SMD) in kcal/mol with Def2TZVPP

$\Delta G_{sp}$  ... relative single point free energy in thf(SMD) in kcal/mol ( $\Delta G_{sp} = \Delta E_{sp}/\text{Def2TZVPP} + \Delta G_{\text{corr}}$ [level of optimization])

## Single point energies in Figure S4-1 with BP86-D3BJ and PBE0-D3BJ

| BP86-D3BJ/Def2TZVPP thf(SMD) |                               |                               | PBE0-D3BJ/Def2TZVPP thf(SMD) |                               |                               |  |
|------------------------------|-------------------------------|-------------------------------|------------------------------|-------------------------------|-------------------------------|--|
| $E_{sp}$<br>[hartree]        | $\Delta E_{sp}$<br>[kcal/mol] | $\Delta G_{sp}$<br>[kcal/mol] | $E_{sp}$<br>[hartree]        | $\Delta E_{sp}$<br>[kcal/mol] | $\Delta G_{sp}$<br>[kcal/mol] |  |
| -5003.23606760               | 0.0                           | 0.00                          | -4999.03162587               | 0.0                           | 0.00                          |  |
| -5003.23606773               | 0.0                           | 0.00                          | -4999.03162595               | 0.0                           | 0.00                          |  |
| -5003.23870982               | -1.7                          | -1.07                         | -4999.03267207               | -0.7                          | -0.07                         |  |
| -5003.28370254               | -29.9                         | -10.89                        | -4999.06949506               | -23.8                         | -4.76                         |  |
| -5003.27279223               | -23.0                         | -5.46                         | -4999.06094770               | -18.4                         | -0.81                         |  |
| -5003.27118420               | -22.0                         | -4.10                         | -4999.05686443               | -15.8                         | 2.10                          |  |
| -5003.30724589               | -44.7                         | -26.14                        | -4999.10089685               | -43.5                         | -24.94                        |  |
| -5003.27687124               | -25.6                         | -7.27                         | -4999.06262564               | -19.5                         | -1.12                         |  |
| -5003.24872569               | -7.9                          | 7.33                          | -4999.03804854               | -4.0                          | 11.24                         |  |
| -5003.25129684               | -9.6                          | 10.32                         | -4999.03585653               | -2.7                          | 17.23                         |  |
| -5003.28501637               | -30.7                         | -12.26                        | -4999.07974126               | -30.2                         | -11.73                        |  |
| -5003.27162920               | -22.3                         | -0.92                         | -4999.05530433               | -14.9                         | 6.53                          |  |
| -5003.25863665               | -14.2                         | 5.43                          | -4999.04525034               | -8.5                          | 11.05                         |  |
| -5003.25851836               | -14.1                         | 5.66                          | -4999.04492637               | -8.3                          | 11.40                         |  |
| -5003.25924190               | -14.5                         | 5.89                          | -4999.04358706               | -7.5                          | 12.92                         |  |
| -5003.30720647               | -44.6                         | -23.10                        | -4999.09944526               | -42.6                         | -21.02                        |  |
| -5003.27961941               | -27.3                         | -9.93                         | -4999.06377437               | -20.2                         | -2.77                         |  |
| -5003.25154561               | -9.7                          | 7.84                          | -4999.03987709               | -5.2                          | 12.37                         |  |
| -5003.25069813               | -9.2                          | 7.54                          | -4999.03896516               | -4.6                          | 12.11                         |  |
| -5003.28488909               | -30.6                         | -10.15                        | -4999.07548417               | -27.5                         | -7.04                         |  |

$E_{sp}$  ..... single point electronic energy in thf(SMD) in hartree with Def2TZVPP after mass balance

$\Delta E_{sp}$  ... relative single point electronic energy in thf(SMD) in kcal/mol with Def2TZVPP

$\Delta G_{sp}$  ... relative single point free energy in thf(SMD) in kcal/mol ( $\Delta G_{sp} = \Delta E_{sp}/\text{Def2TZVPP} + \Delta G_{\text{corr}}$ [level of optimization])

Single point energies in Figure S5-1 with M06,  $\omega$ B97XD and MN12SX

| $\omega$ B97XD/Def2TZVPP thf(SMD) |                               |                               | M06/Def2TZVPP thf(SMD) |                               |                               | MN12SX/Def2TZVPP thf(SMD) |                               |                               |
|-----------------------------------|-------------------------------|-------------------------------|------------------------|-------------------------------|-------------------------------|---------------------------|-------------------------------|-------------------------------|
| $E_{sp}$<br>[hartree]             | $\Delta E_{sp}$<br>[kcal/mol] | $\Delta G_{sp}$<br>[kcal/mol] | $E_{sp}$<br>[hartree]  | $\Delta E_{sp}$<br>[kcal/mol] | $\Delta G_{sp}$<br>[kcal/mol] | $E_{sp}$<br>[hartree]     | $\Delta E_{sp}$<br>[kcal/mol] | $\Delta G_{sp}$<br>[kcal/mol] |
| -5001.89690063                    | -47.5                         | -2.91                         | -5000.60063002         | -38.9                         | 5.72                          | -5000.10559372            | -33.4                         | 11.15                         |
| -5001.88317149                    | -38.9                         | 5.77                          | -5000.58907855         | -31.6                         | 13.04                         | -5000.09328282            | -25.7                         | 18.94                         |
| -5001.88073907                    | -37.4                         | 6.99                          | -5000.58754011         | -30.6                         | 13.69                         | -5000.09212051            | -25.0                         | 19.37                         |
| -5001.88519355                    | -40.1                         | 5.99                          | -5000.59139458         | -33.1                         | 13.07                         | -5000.09495389            | -26.8                         | 19.39                         |
| -5001.88425843                    | -39.6                         | 6.55                          | -5000.59083536         | -32.7                         | 13.40                         | -5000.09459295            | -26.5                         | 19.59                         |
| -5001.92592484                    | -65.7                         | -18.58                        | -5000.63278273         | -59.0                         | -11.91                        | -5000.13236209            | -50.2                         | -3.10                         |
| -5001.89705277                    | -47.6                         | -1.16                         | -5000.59633723         | -36.2                         | 10.26                         | -5000.09945292            | -29.6                         | 16.85                         |
| -5001.87895937                    | -36.2                         | 8.30                          | -5000.57954155         | -25.6                         | 18.91                         | -5000.08310464            | -19.3                         | 25.22                         |
| -5001.87292563                    | -32.4                         | 13.87                         | -5000.57669406         | -23.8                         | 22.48                         | -5000.08238553            | -18.9                         | 27.45                         |
| -5001.87802123                    | -35.6                         | 11.95                         | -5000.57940466         | -25.5                         | 22.06                         | -5000.08246550            | -18.9                         | 28.68                         |
| -5001.87802116                    | -35.6                         | 11.95                         | -5000.57940460         | -25.5                         | 22.06                         | -5000.08246539            | -18.9                         | 28.68                         |
| -5001.87090248                    | -31.2                         | 15.03                         | -5000.57805701         | -24.7                         | 21.51                         | -5000.08021031            | -17.5                         | 28.71                         |
| -5001.86789209                    | -29.3                         | 17.40                         | -5000.57491075         | -22.7                         | 23.97                         | -5000.07868294            | -16.5                         | 30.15                         |
| -5001.91928551                    | -61.5                         | -9.47                         | -5000.62336707         | -53.1                         | -1.06                         | -5000.11983857            | -42.4                         | 9.70                          |
| -5001.88735084                    | -41.5                         | 6.97                          | -5000.58950576         | -31.9                         | 16.59                         | -5000.09473871            | -26.6                         | 21.86                         |
| -5001.87370218                    | -32.9                         | 15.07                         | -5000.57895696         | -25.3                         | 22.74                         | -5000.08194272            | -18.6                         | 29.42                         |
| -5001.87167302                    | -31.7                         | 15.73                         | -5000.57848193         | -25.0                         | 22.43                         | -5000.08072393            | -17.8                         | 29.56                         |
| -5001.87107373                    | -31.3                         | 17.77                         | -5000.57763144         | -24.4                         | 24.62                         | -5000.07979264            | -17.2                         | 31.81                         |
| -5001.92538477                    | -65.4                         | -14.46                        | -5000.62870724         | -56.5                         | -5.57                         | -5000.12701476            | -46.9                         | 4.03                          |
| -5001.89030693                    | -43.4                         | 6.54                          | -5000.59609964         | -36.0                         | 13.88                         | -5000.09877087            | -29.1                         | 20.75                         |
| -5001.87527608                    | -33.9                         | 13.79                         | -5000.58204333         | -27.2                         | 20.51                         | -5000.08428425            | -20.1                         | 27.65                         |
| -5001.87801833                    | -35.6                         | 12.15                         | -5000.58007548         | -26.0                         | 21.83                         | -5000.08399835            | -19.9                         | 27.91                         |
| -5001.91943372                    | -61.6                         | -11.44                        | -5000.62737282         | -55.6                         | -5.44                         | -5000.12386257            | -44.9                         | 5.30                          |

$E_{sp}$  ..... single point electronic energy in thf (SMD) in hartree with Def2TZVPP after mass balance

$\Delta E_{sp}$  ... relative single point electronic energy in thf(SMD) in kcal/mol with Def2TZVPP

$\Delta G_{sp}$  ... relative single point free energy in thf(SMD) in kcal/mol ( $\Delta G_{sp} = \Delta E_{sp}/\text{Def2TZVPP} + \Delta G_{\text{corr}}$ [level of optimization])

## Single point energies in Figure S5-1 with MN12L and M06L

| MN12L/Def2TZVPP thf(SMD) |                               |                               | M06L/Def2TZVPP thf(SMD) |                               |                               |  |
|--------------------------|-------------------------------|-------------------------------|-------------------------|-------------------------------|-------------------------------|--|
| $E_{sp}$<br>[hartree]    | $\Delta E_{sp}$<br>[kcal/mol] | $\Delta G_{sp}$<br>[kcal/mol] | $E_{sp}$<br>[hartree]   | $\Delta E_{sp}$<br>[kcal/mol] | $\Delta G_{sp}$<br>[kcal/mol] |  |
| -4999.43022220           | -41.7                         | 2.87                          | -5002.27672779          | -44.7                         | -0.14                         |  |
| -4999.41662374           | -33.2                         | 11.47                         | -5002.26165490          | -35.3                         | 9.39                          |  |
| -4999.41457818           | -31.9                         | 12.45                         | -5002.25947297          | -33.9                         | 10.45                         |  |
| -4999.42127194           | -36.1                         | 10.04                         | -5002.26379922          | -36.6                         | 9.53                          |  |
| -4999.41996552           | -35.3                         | 10.84                         | -5002.26318508          | -36.2                         | 9.89                          |  |
| -4999.44564233           | -51.4                         | -4.26                         | -5002.29670133          | -57.3                         | -10.12                        |  |
| -4999.42441786           | -38.1                         | 8.36                          | -5002.27008231          | -40.6                         | 5.88                          |  |
| -4999.40559770           | -26.3                         | 18.28                         | -5002.25081486          | -28.5                         | 16.08                         |  |
| -4999.40596839           | -26.5                         | 19.83                         | -5002.24786516          | -26.6                         | 19.71                         |  |
| -4999.40495083           | -25.9                         | 21.75                         | -5002.24986609          | -27.9                         | 19.74                         |  |
| -4999.40495072           | -25.9                         | 21.75                         | -5002.24986606          | -27.9                         | 19.74                         |  |
| -4999.40470597           | -25.7                         | 20.51                         | -5002.24867526          | -27.1                         | 19.09                         |  |
| -4999.40436310           | -25.5                         | 21.21                         | -5002.24589592          | -25.4                         | 21.32                         |  |
| -4999.43908241           | -47.3                         | 4.80                          | -5002.28730320          | -51.4                         | 0.71                          |  |
| -4999.42214888           | -36.6                         | 11.83                         | -5002.26439619          | -37.0                         | 11.49                         |  |
| -4999.40694520           | -27.1                         | 20.90                         | -5002.24862959          | -27.1                         | 20.92                         |  |
| -4999.40454929           | -25.6                         | 21.79                         | -5002.24731663          | -26.3                         | 21.12                         |  |
| -4999.40528230           | -26.1                         | 22.99                         | -5002.24589762          | -25.4                         | 23.68                         |  |
| -4999.44449801           | -50.7                         | 0.24                          | -5002.29214136          | -54.4                         | -3.49                         |  |
| -4999.43045895           | -41.9                         | 8.04                          | -5002.26894155          | -39.8                         | 10.06                         |  |
| -4999.41351382           | -31.2                         | 16.48                         | -5002.25140464          | -28.8                         | 18.88                         |  |
| -4999.41283694           | -30.8                         | 16.99                         | -5002.24965773          | -27.7                         | 20.06                         |  |
| -4999.44727611           | -52.4                         | -2.21                         | -5002.29026729          | -53.2                         | -3.02                         |  |

$E_{sp}$  ..... single point electronic energy in thf (SMD) in hartree with Def2TZVPP after mass balance

$\Delta E_{sp}$  ... relative single point electronic energy in thf(SMD) in kcal/mol with Def2TZVPP

$\Delta G_{sp}$  ... relative single point free energy in thf(SMD) in kcal/mol ( $\Delta G_{sp} = \Delta E_{sp}/\text{Def2TZVPP} + \Delta G_{\text{corr}}$ [level of optimization])

## Single point energies in Figure S5-1 with BP86-D3BJ and PBE0-D3BJ

| BP86-D3BJ/Def2TZVPP thf(SMD) |                               |                               | PBE0-D3BJ/Def2TZVPP thf(SMD) |                               |                               |
|------------------------------|-------------------------------|-------------------------------|------------------------------|-------------------------------|-------------------------------|
| $E_{sp}$<br>[hartree]        | $\Delta E_{sp}$<br>[kcal/mol] | $\Delta G_{sp}$<br>[kcal/mol] | $E_{sp}$<br>[hartree]        | $\Delta E_{sp}$<br>[kcal/mol] | $\Delta G_{sp}$<br>[kcal/mol] |
| -5003.32653379               | -56.8                         | -12.19                        | -4999.11232192               | -50.6                         | -6.06                         |
| -5003.31422568               | -49.0                         | -4.40                         | -4999.10075213               | -43.4                         | 1.27                          |
| -5003.31080573               | -46.9                         | -2.56                         | -4999.09854764               | -42.0                         | 2.35                          |
| -5003.31587175               | -50.1                         | -3.94                         | -4999.10151706               | -43.9                         | 2.28                          |
| -5003.31544925               | -49.8                         | -3.70                         | -4999.10130513               | -43.7                         | 2.39                          |
| -5003.34636078               | -69.2                         | -22.08                        | -4999.13943130               | -67.6                         | -20.52                        |
| -5003.32643032               | -56.7                         | -10.28                        | -4999.11000934               | -49.2                         | -2.76                         |
| -5003.31000976               | -46.4                         | -1.86                         | -4999.09541891               | -40.0                         | 4.51                          |
| -5003.30379792               | -42.5                         | 3.82                          | -4999.08898209               | -36.0                         | 10.33                         |
| -5003.30867404               | -45.6                         | 2.04                          | -4999.09386713               | -39.1                         | 8.54                          |
| -5003.30867402               | -45.6                         | 2.04                          | -4999.09386705               | -39.1                         | 8.54                          |
| -5003.29989215               | -40.1                         | 6.16                          | -4999.08707099               | -34.8                         | 11.42                         |
| -5003.29625575               | -37.8                         | 8.93                          | -4999.08366227               | -32.7                         | 14.04                         |
| -5003.34278418               | -67.0                         | -14.90                        | -4999.13009244               | -61.8                         | -9.72                         |
| -5003.31650420               | -50.5                         | -2.00                         | -4999.09888093               | -42.2                         | 6.27                          |
| -5003.30326347               | -42.2                         | 5.84                          | -4999.08723017               | -34.9                         | 13.11                         |
| -5003.30146274               | -41.0                         | 6.35                          | -4999.08594713               | -34.1                         | 13.30                         |
| -5003.30076205               | -40.6                         | 8.46                          | -4999.08491826               | -33.4                         | 15.61                         |
| -5003.34450863               | -68.0                         | -17.14                        | -4999.13339101               | -63.9                         | -12.95                        |
| -5003.31645990               | -50.4                         | -0.55                         | -4999.10114463               | -43.6                         | 6.27                          |
| -5003.30256345               | -41.7                         | 5.98                          | -4999.08895484               | -36.0                         | 11.73                         |
| -5003.30806778               | -45.2                         | 2.61                          | -4999.09154851               | -37.6                         | 10.19                         |
| -5003.33784827               | -63.9                         | -13.67                        | -4999.12857705               | -60.8                         | -10.64                        |

$E_{sp}$  ..... single point electronic energy in thf(SMD) in hartree with Def2TZVPP after mass balance

$\Delta E_{sp}$  ... relative single point electronic energy in thf(SMD) in kcal/mol with Def2TZVPP

$\Delta G_{sp}$  ... relative single point free energy in thf(SMD) in kcal/mol ( $\Delta G_{sp} = \Delta E_{sp}/\text{Def2TZVPP} + \Delta G_{\text{corr}}$ [level of optimization])



Single point energies in Figure S6-1 with M06,  $\omega$ B97XD and MN12SX

| $\omega$ B97XD/Def2TZVPP thf(SMD) |                               |                               | M06/Def2TZVPP thf(SMD) |                               |                               | MN12SX/Def2TZVPP thf(SMD) |                               |                               |
|-----------------------------------|-------------------------------|-------------------------------|------------------------|-------------------------------|-------------------------------|---------------------------|-------------------------------|-------------------------------|
| $E_{sp}$<br>[hartree]             | $\Delta E_{sp}$<br>[kcal/mol] | $\Delta G_{sp}$<br>[kcal/mol] | $E_{sp}$<br>[hartree]  | $\Delta E_{sp}$<br>[kcal/mol] | $\Delta G_{sp}$<br>[kcal/mol] | $E_{sp}$<br>[hartree]     | $\Delta E_{sp}$<br>[kcal/mol] | $\Delta G_{sp}$<br>[kcal/mol] |
| -5001.90756306                    | -54.2                         | 8.67                          | -5000.61152952         | -45.7                         | 17.16                         | -5000.11270746            | -37.9                         | 24.96                         |
| -5001.89097513                    | -43.8                         | 18.29                         | -5000.59700350         | -36.6                         | 25.48                         | -5000.09819516            | -28.8                         | 33.28                         |
| -5001.89162436                    | -44.2                         | 17.49                         | -5000.59733181         | -36.8                         | 24.89                         | -5000.09734228            | -28.3                         | 33.43                         |
| -5001.89161389                    | -44.2                         | 18.13                         | -5000.59761706         | -37.0                         | 25.33                         | -5000.09786587            | -28.6                         | 33.72                         |
| -5001.89520041                    | -46.4                         | 16.61                         | -5000.59982652         | -38.4                         | 24.68                         | -5000.09823198            | -28.8                         | 34.23                         |
| -5001.87691485                    | -35.0                         | 20.01                         | -5000.58100226         | -26.5                         | 28.42                         | -5000.08524528            | -20.7                         | 34.30                         |
| -5001.88794185                    | -41.9                         | 19.54                         | -5000.59320708         | -34.2                         | 27.21                         | -5000.09377249            | -26.0                         | 35.40                         |
| -5001.93569830                    | -71.8                         | -6.15                         | -5000.64023440         | -63.7                         | 1.98                          | -5000.13592968            | -52.5                         | 13.22                         |
| -5001.90739707                    | -54.1                         | 9.66                          | -5000.60891668         | -44.1                         | 19.68                         | -5000.10901535            | -35.6                         | 28.16                         |
| -5001.88906798                    | -42.6                         | 17.48                         | -5000.59281238         | -34.0                         | 26.10                         | -5000.09306514            | -25.6                         | 34.49                         |
| -5001.89204537                    | -44.4                         | 16.93                         | -5000.59514852         | -35.4                         | 25.96                         | -5000.09514509            | -26.9                         | 34.50                         |
| -5001.89034576                    | -43.4                         | 17.00                         | -5000.59378523         | -34.6                         | 25.82                         | -5000.09341887            | -25.8                         | 34.60                         |
| -5001.89024095                    | -43.3                         | 18.03                         | -5000.59465875         | -35.1                         | 26.23                         | -5000.09368986            | -26.0                         | 35.39                         |
| -5001.89042672                    | -43.4                         | 18.20                         | -5000.59560887         | -35.7                         | 25.92                         | -5000.09358993            | -25.9                         | 35.73                         |
| -5001.88526542                    | -40.2                         | 20.25                         | -5000.58777713         | -30.8                         | 29.65                         | -5000.08975900            | -23.5                         | 36.95                         |
| -5001.88261103                    | -38.5                         | 21.62                         | -5000.58848502         | -31.2                         | 28.90                         | -5000.08823436            | -22.5                         | 37.61                         |
| -5001.93858249                    | -73.6                         | -8.23                         | -5000.64464256         | -66.5                         | -1.06                         | -5000.13678295            | -53.0                         | 12.42                         |
| -5001.89675026                    | -47.4                         | 15.88                         | -5000.59837063         | -37.4                         | 25.84                         | -5000.09814646            | -28.8                         | 34.53                         |
| -5001.87985739                    | -36.8                         | 25.59                         | -5000.58532226         | -29.3                         | 33.14                         | -5000.08661401            | -21.5                         | 40.87                         |
| -5001.88079839                    | -37.4                         | 25.55                         | -5000.58533214         | -29.3                         | 33.68                         | -5000.08466438            | -20.3                         | 42.64                         |
| -5001.87787201                    | -35.6                         | 25.84                         | -5000.58195117         | -27.1                         | 34.25                         | -5000.08179746            | -18.5                         | 42.90                         |
| -5001.93330735                    | -70.3                         | -7.11                         | -5000.63939255         | -63.2                         | 0.05                          | -5000.13424345            | -51.4                         | 11.82                         |
| -5001.90859131                    | -54.8                         | 11.27                         | -5000.61292570         | -46.6                         | 19.53                         | -5000.11219734            | -37.6                         | 28.53                         |
| -5001.89375686                    | -45.5                         | 17.10                         | -5000.59948731         | -38.1                         | 24.47                         | -5000.09813921            | -28.8                         | 33.86                         |
| -5001.89182495                    | -44.3                         | 18.21                         | -5000.59695368         | -36.6                         | 25.97                         | -5000.09739206            | -28.3                         | 34.24                         |
| -5001.89251303                    | -44.7                         | 17.30                         | -5000.59646611         | -36.2                         | 25.79                         | -5000.09622155            | -27.5                         | 34.49                         |
| -5001.89347739                    | -45.3                         | 17.10                         | -5000.59704844         | -36.6                         | 25.84                         | -5000.09573575            | -27.2                         | 35.21                         |
| -5001.93962729                    | -74.3                         | -9.46                         | -5000.64523542         | -66.9                         | -2.00                         | -5000.13897620            | -54.4                         | 10.47                         |

$E_{sp}$  ..... single point electronic energy in thf (SMD) in hartree with Def2TZVPP after mass balance

$\Delta E_{sp}$  ... relative single point electronic energy in thf(SMD) in kcal/mol with Def2TZVPP

$\Delta G_{sp}$  ... relative single point free energy in thf(SMD) in kcal/mol ( $\Delta G_{sp} = \Delta E_{sp}/\text{Def2TZVPP} + \Delta G_{\text{corr}}$ [level of optimization])

## Single point energies in Figure S6-1 with MN12L and M06L

| MN12L/Def2TZVPP thf(SMD) |                               |                               | M06L/Def2TZVPP thf(SMD) |                               |                               |  |
|--------------------------|-------------------------------|-------------------------------|-------------------------|-------------------------------|-------------------------------|--|
| $E_{sp}$<br>[hartree]    | $\Delta E_{sp}$<br>[kcal/mol] | $\Delta G_{sp}$<br>[kcal/mol] | $E_{sp}$<br>[hartree]   | $\Delta E_{sp}$<br>[kcal/mol] | $\Delta G_{sp}$<br>[kcal/mol] |  |
| -4999.44324736           | -49.9                         | 12.97                         | -5002.28667419          | -51.0                         | 11.89                         |  |
| -4999.42468038           | -38.2                         | 23.84                         | -5002.26930978          | -40.1                         | 22.00                         |  |
| -4999.42278821           | -37.0                         | 24.63                         | -5002.26922483          | -40.0                         | 21.66                         |  |
| -4999.42594177           | -39.0                         | 23.28                         | -5002.26869367          | -39.7                         | 22.62                         |  |
| -4999.42490314           | -38.4                         | 24.67                         | -5002.27015537          | -40.6                         | 22.44                         |  |
| -4999.40386740           | -25.2                         | 29.79                         | -5002.25468844          | -30.9                         | 24.07                         |  |
| -4999.42236135           | -36.8                         | 24.63                         | -5002.26607281          | -38.0                         | 23.38                         |  |
| -4999.45241764           | -55.6                         | 10.05                         | -5002.30341873          | -61.5                         | 4.22                          |  |
| -4999.43689770           | -45.9                         | 17.84                         | -5002.28293304          | -48.6                         | 15.13                         |  |
| -4999.41889055           | -34.6                         | 25.46                         | -5002.26296681          | -36.1                         | 23.97                         |  |
| -4999.42072532           | -35.8                         | 25.63                         | -5002.26652615          | -38.3                         | 23.06                         |  |
| -4999.41722302           | -33.6                         | 26.83                         | -5002.26443861          | -37.0                         | 23.38                         |  |
| -4999.41833120           | -34.2                         | 27.10                         | -5002.26503463          | -37.4                         | 23.96                         |  |
| -4999.41798604           | -34.0                         | 27.59                         | -5002.26482651          | -37.3                         | 24.37                         |  |
| -4999.40969098           | -28.8                         | 31.62                         | -5002.25975093          | -34.1                         | 26.38                         |  |
| -4999.41139831           | -29.9                         | 30.24                         | -5002.25956881          | -34.0                         | 26.19                         |  |
| -4999.45840033           | -59.4                         | 6.03                          | -5002.30743946          | -64.0                         | 1.43                          |  |
| -4999.42454335           | -38.1                         | 25.14                         | -5002.27248111          | -42.1                         | 21.23                         |  |
| -4999.41117998           | -29.8                         | 32.63                         | -5002.25715206          | -32.4                         | 29.96                         |  |
| -4999.40762530           | -27.5                         | 35.41                         | -5002.25552834          | -31.4                         | 31.52                         |  |
| -4999.40715046           | -27.2                         | 34.16                         | -5002.25054135          | -28.3                         | 33.10                         |  |
| -4999.45292779           | -56.0                         | 7.27                          | -5002.30278869          | -61.1                         | 2.16                          |  |
| -4999.44622142           | -51.7                         | 14.35                         | -5002.28582307          | -50.4                         | 15.68                         |  |
| -4999.42967533           | -41.4                         | 21.25                         | -5002.26860884          | -39.6                         | 22.99                         |  |
| -4999.42853585           | -40.7                         | 21.87                         | -5002.26748335          | -38.9                         | 23.60                         |  |
| -4999.42764377           | -40.1                         | 21.95                         | -5002.26693637          | -38.6                         | 23.46                         |  |
| -4999.42478391           | -38.3                         | 24.15                         | -5002.26676596          | -38.5                         | 23.98                         |  |
| -4999.46304380           | -62.3                         | 2.54                          | -5002.30861920          | -64.7                         | 0.12                          |  |

$E_{sp}$  ..... single point electronic energy in thf (SMD) in hartree with Def2TZVPP after mass balance

$\Delta E_{sp}$  ... relative single point electronic energy in thf(SMD) in kcal/mol with Def2TZVPP

$\Delta G_{sp}$  ... relative single point free energy in thf(SMD) in kcal/mol ( $\Delta G_{sp} = \Delta E_{sp}/\text{Def2TZVPP} + \Delta G_{\text{corr}}$ [level of optimization])

## Single point energies in Figure S6-1 with BP86-D3BJ and PBE0-D3BJ

| BP86-D3BJ/Def2TZVPP thf(SMD) |                               |                               | PBE0-D3BJ/Def2TZVPP thf(SMD) |                               |                               |
|------------------------------|-------------------------------|-------------------------------|------------------------------|-------------------------------|-------------------------------|
| $E_{sp}$<br>[hartree]        | $\Delta E_{sp}$<br>[kcal/mol] | $\Delta G_{sp}$<br>[kcal/mol] | $E_{sp}$<br>[hartree]        | $\Delta E_{sp}$<br>[kcal/mol] | $\Delta G_{sp}$<br>[kcal/mol] |
| -5003.33272675               | -60.7                         | 2.20                          | -4999.11783551               | -54.1                         | 8.76                          |
| -5003.31935363               | -52.3                         | 9.81                          | -4999.10604625               | -46.7                         | 15.37                         |
| -5003.31838903               | -51.7                         | 10.02                         | -4999.10622652               | -46.8                         | 14.86                         |
| -5003.31814674               | -51.5                         | 10.80                         | -4999.10483853               | -45.9                         | 16.36                         |
| -5003.32149682               | -53.6                         | 9.43                          | -4999.10799872               | -47.9                         | 15.11                         |
| -5003.30409805               | -42.7                         | 12.27                         | -4999.09596840               | -40.4                         | 14.58                         |
| -5003.31396298               | -48.9                         | 12.53                         | -4999.10062486               | -43.3                         | 18.11                         |
| -5003.35134178               | -72.3                         | -6.65                         | -4999.14472951               | -71.0                         | -5.28                         |
| -5003.33489796               | -62.0                         | 1.72                          | -4999.12018845               | -55.6                         | 8.17                          |
| -5003.31769084               | -51.2                         | 8.84                          | -4999.10488992               | -46.0                         | 14.08                         |
| -5003.32160111               | -53.7                         | 7.70                          | -4999.10815566               | -48.0                         | 13.35                         |
| -5003.31967663               | -52.5                         | 7.92                          | -4999.10720565               | -47.4                         | 12.96                         |
| -5003.31903510               | -52.1                         | 9.28                          | -4999.10650574               | -47.0                         | 14.36                         |
| -5003.31960494               | -52.4                         | 9.21                          | -4999.10622579               | -46.8                         | 14.81                         |
| -5003.31291734               | -48.2                         | 12.22                         | -4999.10298189               | -44.8                         | 15.67                         |
| -5003.31189330               | -47.6                         | 12.56                         | -4999.10039342               | -43.2                         | 16.99                         |
| -5003.35952671               | -77.5                         | -12.05                        | -4999.14915449               | -73.8                         | -8.33                         |
| -5003.32437687               | -55.4                         | 7.87                          | -4999.10842087               | -48.2                         | 15.09                         |
| -5003.30829520               | -45.3                         | 17.07                         | -4999.09577432               | -40.3                         | 22.14                         |
| -5003.31004206               | -46.4                         | 16.52                         | -4999.09612729               | -40.5                         | 22.47                         |
| -5003.30440346               | -42.9                         | 18.51                         | -4999.09070689               | -37.1                         | 24.32                         |
| -5003.35311027               | -73.4                         | -10.21                        | -4999.14391782               | -70.5                         | -7.23                         |
| -5003.33472962               | -61.9                         | 4.19                          | -4999.11845580               | -54.5                         | 11.62                         |
| -5003.32043250               | -52.9                         | 9.68                          | -4999.10634116               | -46.9                         | 15.73                         |
| -5003.31939614               | -52.3                         | 10.23                         | -4999.10533565               | -46.3                         | 16.26                         |
| -5003.32154248               | -53.6                         | 8.40                          | -4999.10596654               | -46.6                         | 15.39                         |
| -5003.32110947               | -53.4                         | 9.08                          | -4999.10687767               | -47.2                         | 15.23                         |
| -5003.35772807               | -76.3                         | -11.49                        | -4999.14812239               | -73.1                         | -8.25                         |

$E_{sp}$  ..... single point electronic energy in thf(SMD) in hartree with Def2TZVPP after mass balance

$\Delta E_{sp}$  ... relative single point electronic energy in thf(SMD) in kcal/mol with Def2TZVPP

$\Delta G_{sp}$  ... relative single point free energy in thf(SMD) in kcal/mol ( $\Delta G_{sp} = \Delta E_{sp}/\text{Def2TZVPP} + \Delta G_{\text{corr}}$ [level of optimization])

Single point energies in Figure S7-1 with M06,  $\omega$ B97XD and MN12SX

| $\omega$ B97XD/Def2TZVPP thf(SMD) |                               |                               | M06/Def2TZVPP thf(SMD) |                               |                               | MN12SX/Def2TZVPP thf(SMD) |                               |                               |
|-----------------------------------|-------------------------------|-------------------------------|------------------------|-------------------------------|-------------------------------|---------------------------|-------------------------------|-------------------------------|
| $E_{sp}$<br>[hartree]             | $\Delta E_{sp}$<br>[kcal/mol] | $\Delta G_{sp}$<br>[kcal/mol] | $E_{sp}$<br>[hartree]  | $\Delta E_{sp}$<br>[kcal/mol] | $\Delta G_{sp}$<br>[kcal/mol] | $E_{sp}$<br>[hartree]     | $\Delta E_{sp}$<br>[kcal/mol] | $\Delta G_{sp}$<br>[kcal/mol] |
| -5001.91401352                    | -58.2                         | -17.57                        | -5000.62159518         | -52.0                         | -11.35                        | -5000.12075468            | -42.9                         | -2.28                         |
| -5001.89200821                    | -44.4                         | -6.33                         | -5000.60087750         | -39.0                         | -0.93                         | -5000.10266440            | -31.6                         | 6.50                          |
| -5001.89336983                    | -45.3                         | -6.99                         | -5000.60158736         | -39.5                         | -1.17                         | -5000.10286012            | -31.7                         | 6.58                          |
| -5001.88725593                    | -41.4                         | -1.00                         | -5000.59672776         | -36.4                         | 4.03                          | -5000.09332767            | -25.7                         | 14.70                         |
| -5001.88375074                    | -39.2                         | 1.38                          | -5000.59317950         | -34.2                         | 6.44                          | -5000.09306834            | -25.6                         | 15.05                         |
| -5001.87485435                    | -33.7                         | 6.72                          | -5000.58319990         | -27.9                         | 12.46                         | -5000.08395132            | -19.8                         | 20.53                         |
| -5001.87288221                    | -32.4                         | 8.73                          | -5000.58127611         | -26.7                         | 14.44                         | -5000.08346240            | -19.5                         | 21.61                         |
| -5001.90695014                    | -53.8                         | -16.21                        | -5000.61335548         | -46.8                         | -9.26                         | -5000.11905804            | -41.9                         | -4.29                         |
| -5001.90721479                    | -54.0                         | -12.67                        | -5000.61432785         | -47.5                         | -6.16                         | -5000.11748710            | -40.9                         | 0.41                          |
| -5001.88736765                    | -41.5                         | -2.45                         | -5000.59649869         | -36.3                         | 2.79                          | -5000.10014186            | -30.0                         | 9.05                          |
| -5001.88486751                    | -39.9                         | 0.82                          | -5000.59455563         | -35.0                         | 5.71                          | -5000.09823032            | -28.8                         | 11.95                         |
| -5001.88490390                    | -40.0                         | 2.35                          | -5000.59264603         | -33.9                         | 8.47                          | -5000.09254001            | -25.2                         | 17.08                         |
| -5001.88402858                    | -39.4                         | 3.64                          | -5000.59321917         | -34.2                         | 8.85                          | -5000.09127240            | -24.4                         | 18.62                         |
| -5001.87619367                    | -34.5                         | 6.26                          | -5000.58382935         | -28.3                         | 12.44                         | -5000.08553047            | -20.8                         | 19.92                         |
| -5001.87619419                    | -34.5                         | 6.26                          | -5000.58382950         | -28.3                         | 12.44                         | -5000.08553052            | -20.8                         | 19.92                         |
| -5001.90597418                    | -53.2                         | -13.94                        | -5000.61298941         | -46.6                         | -7.37                         | -5000.12030774            | -42.7                         | -3.42                         |
| -5001.90690216                    | -53.8                         | -13.35                        | -5000.61535263         | -48.1                         | -7.68                         | -5000.11668422            | -40.4                         | 0.03                          |
| -5001.88759507                    | -41.7                         | -3.27                         | -5000.59771895         | -37.0                         | 1.35                          | -5000.09939277            | -29.5                         | 8.85                          |
| -5001.88520982                    | -40.2                         | -0.61                         | -5000.59555335         | -35.7                         | 3.87                          | -5000.09702547            | -28.1                         | 11.50                         |
| -5001.87981464                    | -36.8                         | 0.39                          | -5000.58972896         | -32.0                         | 5.14                          | -5000.08855108            | -22.7                         | 14.43                         |
| -5001.88568060                    | -40.5                         | -0.20                         | -5000.59476301         | -35.2                         | 5.08                          | -5000.09174479            | -24.7                         | 15.52                         |
| -5001.87629984                    | -34.6                         | 5.43                          | -5000.58744726         | -30.6                         | 9.41                          | -5000.08842520            | -22.7                         | 17.34                         |
| -5001.87377449                    | -33.0                         | 7.95                          | -5000.58471424         | -28.9                         | 12.06                         | -5000.08581791            | -21.0                         | 19.92                         |
| -5001.90304888                    | -51.4                         | -11.78                        | -5000.61057733         | -45.1                         | -5.53                         | -5000.11571549            | -39.8                         | -0.21                         |
| -5001.90525279                    | -52.7                         | -11.35                        | -5000.61440297         | -47.5                         | -6.12                         | -5000.11530437            | -39.5                         | 1.86                          |
| -5001.88737952                    | -41.5                         | -3.29                         | -5000.59895736         | -37.8                         | 0.42                          | -5000.09969520            | -29.7                         | 8.50                          |
| -5001.88638833                    | -40.9                         | -1.92                         | -5000.59697868         | -36.6                         | 2.41                          | -5000.09642232            | -27.7                         | 11.30                         |
| -5001.89240732                    | -44.7                         | -3.51                         | -5000.60154249         | -39.4                         | 1.73                          | -5000.09971593            | -29.7                         | 11.42                         |
| -5001.88811836                    | -42.0                         | 0.35                          | -5000.59849388         | -37.5                         | 4.81                          | -5000.09727701            | -28.2                         | 14.12                         |
| -5001.87174813                    | -31.7                         | 7.35                          | -5000.58073001         | -26.4                         | 12.69                         | -5000.08340206            | -19.5                         | 19.56                         |
| -5001.87543932                    | -34.0                         | 7.59                          | -5000.58419738         | -28.5                         | 13.07                         | -5000.08631114            | -21.3                         | 20.28                         |
| -5001.90067856                    | -49.9                         | -11.17                        | -5000.60859558         | -43.9                         | -5.17                         | -5000.11505035            | -39.4                         | -0.67                         |

$E_{sp}$  ..... single point electronic energy in thf (SMD) in hartree with Def2TZVPP after mass balance

$\Delta E_{sp}$  ... relative single point electronic energy in thf(SMD) in kcal/mol with Def2TZVPP

$\Delta G_{sp}$  ... relative single point free energy in thf(SMD) in kcal/mol ( $\Delta G_{sp} = \Delta E_{sp}/\text{Def2TZVPP} + \Delta G_{\text{corr}}[\text{level of optimization}]$ )

## Single point energies in Figure S7-1 with MN12L and M06L

| MN12L/Def2TZVPP thf(SMD) |                               |                               | M06L/Def2TZVPP thf(SMD) |                               |                               |  |
|--------------------------|-------------------------------|-------------------------------|-------------------------|-------------------------------|-------------------------------|--|
| $E_{sp}$<br>[hartree]    | $\Delta E_{sp}$<br>[kcal/mol] | $\Delta G_{sp}$<br>[kcal/mol] | $E_{sp}$<br>[hartree]   | $\Delta E_{sp}$<br>[kcal/mol] | $\Delta G_{sp}$<br>[kcal/mol] |  |
| -4999.45045198           | -54.4                         | -13.74                        | -5002.29056710          | -53.4                         | -12.74                        |  |
| -4999.43323393           | -43.6                         | -5.51                         | -5002.28134722          | -47.6                         | -9.53                         |  |
| -4999.43327250           | -43.6                         | -5.33                         | -5002.28102398          | -47.4                         | -9.12                         |  |
| -4999.42644752           | -39.3                         | 1.10                          | -5002.27561188          | -44.0                         | -3.58                         |  |
| -4999.42729841           | -39.9                         | 0.75                          | -5002.27365878          | -42.8                         | -2.17                         |  |
| -4999.41102718           | -29.7                         | 10.72                         | -5002.25987186          | -34.1                         | 6.24                          |  |
| -4999.41158870           | -30.0                         | 11.14                         | -5002.25865131          | -33.4                         | 7.78                          |  |
| -4999.44805976           | -52.9                         | -15.31                        | -5002.29849977          | -58.4                         | -20.79                        |  |
| -4999.44899822           | -53.5                         | -12.19                        | -5002.28447389          | -49.6                         | -8.28                         |  |
| -4999.43390756           | -44.0                         | -4.96                         | -5002.27622563          | -44.4                         | -5.34                         |  |
| -4999.43252042           | -43.2                         | -2.39                         | -5002.27476723          | -43.5                         | -2.73                         |  |
| -4999.42578358           | -38.9                         | 3.39                          | -5002.27096322          | -41.1                         | 1.21                          |  |
| -4999.42493778           | -38.4                         | 4.67                          | -5002.27054141          | -40.8                         | 2.22                          |  |
| -4999.41698036           | -33.4                         | 7.36                          | -5002.26449727          | -37.0                         | 3.71                          |  |
| -4999.41697953           | -33.4                         | 7.36                          | -5002.26449728          | -37.0                         | 3.71                          |  |
| -4999.45251584           | -55.7                         | -16.46                        | -5002.29649161          | -57.1                         | -17.88                        |  |
| -4999.44595938           | -51.6                         | -11.17                        | -5002.28489594          | -49.8                         | -9.43                         |  |
| -4999.43075826           | -42.0                         | -3.66                         | -5002.27643069          | -44.5                         | -6.15                         |  |
| -4999.42809323           | -40.4                         | -0.83                         | -5002.27484589          | -43.5                         | -3.99                         |  |
| -4999.41867136           | -34.5                         | 2.70                          | -5002.26747332          | -38.9                         | -1.75                         |  |
| -4999.42225924           | -36.7                         | 3.54                          | -5002.27108304          | -41.2                         | -0.92                         |  |
| -4999.41966643           | -35.1                         | 4.91                          | -5002.26540188          | -37.6                         | 2.38                          |  |
| -4999.41695287           | -33.4                         | 7.55                          | -5002.26371842          | -36.6                         | 4.38                          |  |
| -4999.44657711           | -52.0                         | -12.40                        | -5002.29268166          | -54.7                         | -15.16                        |  |
| -4999.44630590           | -51.8                         | -10.42                        | -5002.28678838          | -51.0                         | -9.65                         |  |
| -4999.43221323           | -43.0                         | -4.73                         | -5002.27964484          | -46.6                         | -8.32                         |  |
| -4999.42797896           | -40.3                         | -1.33                         | -5002.27624296          | -44.4                         | -5.44                         |  |
| -4999.43300918           | -43.5                         | -2.30                         | -5002.27917764          | -46.3                         | -5.09                         |  |
| -4999.43156116           | -42.5                         | -0.22                         | -5002.27629585          | -44.4                         | -2.12                         |  |
| -4999.41452961           | -31.9                         | 7.20                          | -5002.26066528          | -34.6                         | 4.42                          |  |
| -4999.41986531           | -35.2                         | 6.40                          | -5002.26472398          | -37.2                         | 4.43                          |  |
| -4999.44725825           | -52.4                         | -13.71                        | -5002.29500558          | -56.2                         | -17.50                        |  |

$E_{sp}$  ..... single point electronic energy in thf (SMD) in hartree with Def2TZVPP after mass balance

$\Delta E_{sp}$  ... relative single point electronic energy in thf(SMD) in kcal/mol with Def2TZVPP

$\Delta G_{sp}$  ... relative single point free energy in thf(SMD) in kcal/mol ( $\Delta G_{sp} = \Delta E_{sp}/\text{Def2TZVPP} + \Delta G_{\text{corr}}[\text{level of optimization}]$ )

## Single point energies in Figure S7-1 with BP86-D3BJ and PBE0-D3BJ

| BP86-D3BJ/Def2TZVPP thf(SMD) |                               |                               | PBE0-D3BJ/Def2TZVPP thf(SMD) |                               |                               |  |
|------------------------------|-------------------------------|-------------------------------|------------------------------|-------------------------------|-------------------------------|--|
| $E_{sp}$<br>[hartree]        | $\Delta E_{sp}$<br>[kcal/mol] | $\Delta G_{sp}$<br>[kcal/mol] | $E_{sp}$<br>[hartree]        | $\Delta E_{sp}$<br>[kcal/mol] | $\Delta G_{sp}$<br>[kcal/mol] |  |
| -5003.34634733               | -69.2                         | -28.54                        | -4999.12994117               | -61.7                         | -21.03                        |  |
| -5003.34001039               | -65.2                         | -27.14                        | -4999.11324574               | -51.2                         | -13.13                        |  |
| -5003.33946796               | -64.9                         | -26.59                        | -4999.11288511               | -51.0                         | -12.70                        |  |
| -5003.33451434               | -61.8                         | -21.34                        | -4999.10545583               | -46.3                         | -5.89                         |  |
| -5003.33279040               | -60.7                         | -20.07                        | -4999.10288820               | -44.7                         | -4.10                         |  |
| -5003.31777379               | -51.3                         | -10.89                        | -4999.09385376               | -39.0                         | 1.33                          |  |
| -5003.31681965               | -50.7                         | -9.52                         | -4999.09209862               | -37.9                         | 3.21                          |  |
| -5003.35077723               | -72.0                         | -34.39                        | -4999.12606032               | -59.3                         | -21.67                        |  |
| -5003.33992291               | -65.2                         | -23.87                        | -4999.12365755               | -57.8                         | -16.45                        |  |
| -5003.33450577               | -61.8                         | -22.71                        | -4999.10743784               | -47.6                         | -8.51                         |  |
| -5003.33298756               | -60.8                         | -20.06                        | -4999.10544459               | -46.3                         | -5.56                         |  |
| -5003.33187843               | -60.1                         | -17.81                        | -4999.10224063               | -44.3                         | -2.00                         |  |
| -5003.33147462               | -59.9                         | -16.81                        | -4999.10176089               | -44.0                         | -0.95                         |  |
| -5003.32457524               | -55.5                         | -14.78                        | -4999.09616684               | -40.5                         | 0.26                          |  |
| -5003.32457511               | -55.5                         | -14.78                        | -4999.09616709               | -40.5                         | 0.26                          |  |
| -5003.34732200               | -69.8                         | -30.57                        | -4999.12358887               | -57.7                         | -18.46                        |  |
| -5003.34112130               | -65.9                         | -25.51                        | -4999.12450974               | -58.3                         | -17.87                        |  |
| -5003.33591961               | -62.7                         | -24.27                        | -4999.10846961               | -48.2                         | -9.83                         |  |
| -5003.33439094               | -61.7                         | -22.15                        | -4999.10697898               | -47.3                         | -7.74                         |  |
| -5003.32773732               | -57.5                         | -20.36                        | -4999.10069300               | -43.3                         | -6.18                         |  |
| -5003.33112944               | -59.7                         | -19.40                        | -4999.10428364               | -45.6                         | -5.34                         |  |
| -5003.32156149               | -53.6                         | -13.65                        | -4999.09683535               | -40.9                         | -0.92                         |  |
| -5003.32031854               | -52.9                         | -11.93                        | -4999.09541379               | -40.0                         | 0.91                          |  |
| -5003.34601555               | -69.0                         | -29.42                        | -4999.12026813               | -55.6                         | -16.05                        |  |
| -5003.34072850               | -65.7                         | -24.30                        | -4999.12270057               | -57.2                         | -15.77                        |  |
| -5003.33808022               | -64.0                         | -25.78                        | -4999.10906595               | -48.6                         | -10.36                        |  |
| -5003.33515433               | -62.2                         | -23.20                        | -4999.10668236               | -47.1                         | -8.12                         |  |
| -5003.33948776               | -64.9                         | -23.73                        | -4999.11125458               | -50.0                         | -8.80                         |  |
| -5003.33687881               | -63.3                         | -20.93                        | -4999.10744956               | -47.6                         | -5.25                         |  |
| -5003.32134219               | -53.5                         | -14.45                        | -4999.09229341               | -38.1                         | 0.99                          |  |
| -5003.32387222               | -55.1                         | -13.48                        | -4999.09563723               | -40.2                         | 1.45                          |  |
| -5003.34750142               | -69.9                         | -31.23                        | -4999.12032439               | -55.7                         | -16.97                        |  |

$E_{sp}$  ..... single point electronic energy in thf(SMD) in hartree with Def2TZVPP after mass balance

$\Delta E_{sp}$  ... relative single point electronic energy in thf(SMD) in kcal/mol with Def2TZVPP

$\Delta G_{sp}$  ... relative single point free energy in thf(SMD) in kcal/mol ( $\Delta G_{sp} = \Delta E_{sp}/\text{Def2TZVPP} + \Delta G_{\text{corr}}$ [level of optimization])

Single point energies in Figure S8-1 with M06,  $\omega$ B97XD and MN12SX

| $\omega$ B97XD/Def2TZVPP thf(SMD) |                               |                               | M06/Def2TZVPP thf(SMD) |                               |                               | MN12SX/Def2TZVPP thf(SMD) |                               |                               |
|-----------------------------------|-------------------------------|-------------------------------|------------------------|-------------------------------|-------------------------------|---------------------------|-------------------------------|-------------------------------|
| $E_{sp}$<br>[hartree]             | $\Delta E_{sp}$<br>[kcal/mol] | $\Delta G_{sp}$<br>[kcal/mol] | $E_{sp}$<br>[hartree]  | $\Delta E_{sp}$<br>[kcal/mol] | $\Delta G_{sp}$<br>[kcal/mol] | $E_{sp}$<br>[hartree]     | $\Delta E_{sp}$<br>[kcal/mol] | $\Delta G_{sp}$<br>[kcal/mol] |
| -4185.83520838                    | 0.0                           | 0.00                          | -4184.95773520         | 0.0                           | 0.00                          | -4184.53426963            | 0.0                           | 0.00                          |
| -4185.86333861                    | -17.7                         | 0.63                          | -4184.98217787         | -15.3                         | 2.94                          | -4184.55757620            | -14.6                         | 3.65                          |
| -4185.85228895                    | -10.7                         | 5.73                          | -4184.97235717         | -9.2                          | 7.27                          | -4184.54680228            | -7.9                          | 8.58                          |
| -4185.89314905                    | -36.4                         | -18.02                        | -4185.01294873         | -34.6                         | -16.31                        | -4184.58364982            | -31.0                         | -12.65                        |
| -4185.86270919                    | -17.3                         | -1.01                         | -4184.98034692         | -14.2                         | 2.06                          | -4184.55438564            | -12.6                         | 3.63                          |
| -4185.83361800                    | 1.0                           | 15.85                         | -4184.95681452         | 0.6                           | 15.43                         | -4184.53041341            | 2.4                           | 17.27                         |
| -4185.87886607                    | -27.4                         | -10.84                        | -4185.00187771         | -27.7                         | -11.14                        | -4184.57271902            | -24.1                         | -7.57                         |
| -4185.85346603                    | -11.5                         | 8.14                          | -4184.97019390         | -7.8                          | 11.78                         | -4184.54494436            | -6.7                          | 12.90                         |
| -4185.84059218                    | -3.4                          | 13.76                         | -4184.95875623         | -0.6                          | 16.50                         | -4184.53377163            | 0.3                           | 17.45                         |
| -4185.89592491                    | -38.1                         | -18.55                        | -4185.01590174         | -36.5                         | -16.95                        | -4184.58672060            | -32.9                         | -13.36                        |
| -4185.85998646                    | -15.5                         | -0.52                         | -4184.97887995         | -13.3                         | 1.76                          | -4184.55328899            | -11.9                         | 3.10                          |
| -4185.83097315                    | 2.7                           | 16.85                         | -4184.95326745         | 2.8                           | 16.99                         | -4184.52831716            | 3.7                           | 17.92                         |
| -4185.88049731                    | -28.4                         | -12.49                        | -4185.00356216         | -28.8                         | -12.83                        | -4184.57404651            | -25.0                         | -9.03                         |

$E_{sp}$  ..... single point electronic energy in thf (SMD) in hartree with Def2TZVPP after mass balance

$\Delta E_{sp}$  ... relative single point electronic energy in thf(SMD) in kcal/mol with Def2TZVPP

$\Delta G_{sp}$  ... relative single point free energy in thf(SMD) in kcal/mol ( $\Delta G_{sp} = \Delta E_{sp}/\text{Def2TZVPP} + \Delta G_{\text{corr}}$ [level of optimization])

## Single point energies in Figure S8-1 with MN12L and M06L

| MN12L/Def2TZVPP thf(SMD) |                               |                               | M06L/Def2TZVPP thf(SMD) |                               |                               |  |
|--------------------------|-------------------------------|-------------------------------|-------------------------|-------------------------------|-------------------------------|--|
| $E_{sp}$<br>[hartree]    | $\Delta E_{sp}$<br>[kcal/mol] | $\Delta G_{sp}$<br>[kcal/mol] | $E_{sp}$<br>[hartree]   | $\Delta E_{sp}$<br>[kcal/mol] | $\Delta G_{sp}$<br>[kcal/mol] |  |
| -4184.01094594           | 0.0                           | 0.00                          | -4186.09250778          | 0.0                           | 0.00                          |  |
| -4184.04726833           | -22.8                         | -4.51                         | -4186.12432860          | -20.0                         | -1.69                         |  |
| -4184.03391579           | -14.4                         | 2.03                          | -4186.11065577          | -11.4                         | 5.06                          |  |
| -4184.06177213           | -31.9                         | -13.56                        | -4186.14496921          | -32.9                         | -14.59                        |  |
| -4184.04501935           | -21.4                         | -5.13                         | -4186.12212055          | -18.6                         | -2.33                         |  |
| -4184.01840665           | -4.7                          | 10.17                         | -4186.09560297          | -1.9                          | 12.91                         |  |
| -4184.05266478           | -26.2                         | -9.62                         | -4186.13546539          | -27.0                         | -10.40                        |  |
| -4184.03624698           | -15.9                         | 3.72                          | -4186.11368646          | -13.3                         | 6.31                          |  |
| -4184.01991279           | -5.6                          | 11.51                         | -4186.09871474          | -3.9                          | 13.24                         |  |
| -4184.06712841           | -35.3                         | -15.71                        | -4186.14818972          | -34.9                         | -15.39                        |  |
| -4184.04024668           | -18.4                         | -3.35                         | -4186.12004934          | -17.3                         | -2.25                         |  |
| -4184.01549497           | -2.9                          | 11.33                         | -4186.09335726          | -0.5                          | 13.66                         |  |
| -4184.05328443           | -26.6                         | -10.64                        | -4186.13646950          | -27.6                         | -11.66                        |  |

$E_{sp}$  ..... single point electronic energy in thf (SMD) in hartree with Def2TZVPP after mass balance

$\Delta E_{sp}$  ... relative single point electronic energy in thf(SMD) in kcal/mol with Def2TZVPP

$\Delta G_{sp}$  ... relative single point free energy in thf(SMD) in kcal/mol ( $\Delta G_{sp} = \Delta E_{sp}/\text{Def2TZVPP} + \Delta G_{\text{corr}}$ [level of optimization])



## Single point energies in Figure S8-1 with BP86-D3BJ and PBE0-D3BJ

| BP86-D3BJ/Def2TZVPP thf(SMD) |                               |                               | PBE0-D3BJ/Def2TZVPP thf(SMD) |                               |                               |  |
|------------------------------|-------------------------------|-------------------------------|------------------------------|-------------------------------|-------------------------------|--|
| $E_{sp}$<br>[hartree]        | $\Delta E_{sp}$<br>[kcal/mol] | $\Delta G_{sp}$<br>[kcal/mol] | $E_{sp}$<br>[hartree]        | $\Delta E_{sp}$<br>[kcal/mol] | $\Delta G_{sp}$<br>[kcal/mol] |  |
| -4186.92335169               | 0.0                           | 0.00                          | -4183.72992118               | 0.0                           | 0.00                          |  |
| -4186.96758681               | -27.8                         | -9.48                         | -4183.76475091               | -21.9                         | -3.58                         |  |
| -4186.95792492               | -21.7                         | -5.25                         | -4183.75612906               | -16.4                         | 0.00                          |  |
| -4186.98829815               | -40.8                         | -22.42                        | -4183.79270230               | -39.4                         | -21.06                        |  |
| -4186.96428178               | -25.7                         | -9.43                         | -4183.76179524               | -20.0                         | -3.75                         |  |
| -4186.93653475               | -8.3                          | 6.58                          | -4183.73662648               | -4.2                          | 10.65                         |  |
| -4186.97183042               | -30.4                         | -13.87                        | -4183.77825545               | -30.3                         | -13.77                        |  |
| -4186.95617983               | -20.6                         | -1.00                         | -4183.75079342               | -13.1                         | 6.50                          |  |
| -4186.94394492               | -12.9                         | 4.21                          | -4183.74258571               | -7.9                          | 9.19                          |  |
| -4186.99071675               | -42.3                         | -22.72                        | -4183.79422407               | -40.4                         | -20.80                        |  |
| -4186.96154509               | -24.0                         | -8.93                         | -4183.76055032               | -19.2                         | -4.19                         |  |
| -4186.93451756               | -7.0                          | 7.18                          | -4183.73483976               | -3.1                          | 11.10                         |  |
| -4186.97334117               | -31.4                         | -15.44                        | -4183.77985079               | -31.3                         | -15.40                        |  |

$E_{sp}$  ..... single point electronic energy in thf(SMD) in hartree with Def2TZVPP after mass balance

$\Delta E_{sp}$  ... relative single point electronic energy in thf(SMD) in kcal/mol with Def2TZVPP

$\Delta G_{sp}$  ... relative single point free energy in thf(SMD) in kcal/mol ( $\Delta G_{sp} = \Delta E_{sp}/\text{Def2TZVPP} + \Delta G_{\text{corr}}[\text{level of optimization}]$ )

Single point energies in Figure S9-1 with M06,  $\omega$ B97XD and MN12SX

| $\omega$ B97XD/Def2TZVPP thf(SMD) |                               |                               | M06/Def2TZVPP thf(SMD) |                               |                               | MN12SX/Def2TZVPP thf(SMD) |                               |                               |
|-----------------------------------|-------------------------------|-------------------------------|------------------------|-------------------------------|-------------------------------|---------------------------|-------------------------------|-------------------------------|
| $E_{sp}$<br>[hartree]             | $\Delta E_{sp}$<br>[kcal/mol] | $\Delta G_{sp}$<br>[kcal/mol] | $E_{sp}$<br>[hartree]  | $\Delta E_{sp}$<br>[kcal/mol] | $\Delta G_{sp}$<br>[kcal/mol] | $E_{sp}$<br>[hartree]     | $\Delta E_{sp}$<br>[kcal/mol] | $\Delta G_{sp}$<br>[kcal/mol] |
| -4185.92171926                    | -54.3                         | -15.25                        | -4185.03498110         | -48.5                         | -9.44                         | -4184.60015296            | -41.3                         | -2.31                         |
| -4185.90038859                    | -40.9                         | -5.76                         | -4185.01509906         | -36.0                         | -0.85                         | -4184.58327663            | -30.8                         | 4.39                          |
| -4185.90157186                    | -41.6                         | -3.74                         | -4185.01864356         | -38.2                         | -0.31                         | -4184.58369802            | -31.0                         | 6.89                          |
| -4185.89866784                    | -39.8                         | -1.99                         | -4185.01630605         | -36.8                         | 1.08                          | -4184.58288901            | -30.5                         | 7.33                          |
| -4185.89604164                    | -38.2                         | -1.69                         | -4185.01254212         | -34.4                         | 2.09                          | -4184.57973748            | -28.5                         | 7.95                          |
| -4185.89815480                    | -39.5                         | -2.40                         | -4185.01362404         | -35.1                         | 2.03                          | -4184.58052780            | -29.0                         | 8.07                          |
| -4185.90076506                    | -41.1                         | -2.41                         | -4185.01789493         | -37.8                         | 0.98                          | -4184.58284024            | -30.5                         | 8.25                          |
| -4185.91709026                    | -51.4                         | -15.33                        | -4185.03022477         | -45.5                         | -9.44                         | -4184.60075568            | -41.7                         | -5.67                         |
| -4185.91904030                    | -52.6                         | -15.89                        | -4185.03424931         | -48.0                         | -11.30                        | -4184.59868998            | -40.4                         | -3.71                         |
| -4185.89749842                    | -39.1                         | -3.47                         | -4185.01445143         | -35.6                         | 0.03                          | -4184.58195169            | -29.9                         | 5.69                          |
| -4185.89377166                    | -36.7                         | 0.58                          | -4185.01179198         | -33.9                         | 3.41                          | -4184.57863802            | -27.8                         | 9.49                          |
| -4185.89382294                    | -36.8                         | 0.16                          | -4185.01049410         | -33.1                         | 3.83                          | -4184.57749404            | -27.1                         | 9.82                          |
| -4185.89191524                    | -35.6                         | 2.12                          | -4185.00876976         | -32.0                         | 5.68                          | -4184.57724870            | -27.0                         | 10.73                         |
| -4185.89038023                    | -34.6                         | 3.90                          | -4185.00827409         | -31.7                         | 6.80                          | -4184.57481848            | -25.4                         | 13.07                         |
| -4185.90608215                    | -44.5                         | -7.13                         | -4185.02178790         | -40.2                         | -2.85                         | -4184.59423608            | -37.6                         | -0.28                         |
| -4185.92207329                    | -54.5                         | -16.23                        | -4185.03741919         | -50.0                         | -11.72                        | -4184.60434920            | -44.0                         | -5.70                         |
| -4185.90245788                    | -42.2                         | -7.28                         | -4185.01871942         | -38.3                         | -3.35                         | -4184.58748665            | -33.4                         | 1.52                          |
| -4185.90410980                    | -43.2                         | -7.02                         | -4185.02180702         | -40.2                         | -3.99                         | -4184.58719147            | -33.2                         | 3.01                          |
| -4185.90386126                    | -43.1                         | -4.80                         | -4185.02155512         | -40.0                         | -1.76                         | -4184.58629730            | -32.6                         | 5.63                          |
| -4185.89009821                    | -34.4                         | 2.27                          | -4185.00865158         | -32.0                         | 4.77                          | -4184.57519078            | -25.7                         | 11.04                         |
| -4185.88899596                    | -33.8                         | 2.39                          | -4185.00638611         | -30.5                         | 5.62                          | -4184.57357003            | -24.7                         | 11.48                         |
| -4185.88601198                    | -31.9                         | 5.67                          | -4185.00234305         | -28.0                         | 9.56                          | -4184.57044026            | -22.7                         | 14.85                         |
| -4185.91996338                    | -53.2                         | -16.17                        | -4185.03576633         | -49.0                         | -11.95                        | -4184.60627563            | -45.2                         | -8.17                         |
| -4185.91627494                    | -50.9                         | -10.47                        | -4185.03138800         | -46.2                         | -5.82                         | -4184.59759881            | -39.7                         | 0.66                          |
| -4185.89787854                    | -39.3                         | -2.98                         | -4185.01570942         | -36.4                         | -0.03                         | -4184.58151705            | -29.6                         | 6.70                          |
| -4185.89769025                    | -39.2                         | -1.76                         | -4185.01452972         | -35.6                         | 1.81                          | -4184.58124791            | -29.5                         | 7.97                          |
| -4185.89310331                    | -36.3                         | 0.35                          | -4185.00836763         | -31.8                         | 4.91                          | -4184.57586085            | -26.1                         | 10.58                         |
| -4185.89307773                    | -36.3                         | 0.57                          | -4185.00829593         | -31.7                         | 5.16                          | -4184.57578884            | -26.1                         | 10.83                         |
| -4185.89329561                    | -36.5                         | 1.40                          | -4185.01105036         | -33.5                         | 4.40                          | -4184.57649793            | -26.5                         | 11.35                         |
| -4185.89332600                    | -36.5                         | 1.67                          | -4185.01133488         | -33.6                         | 4.50                          | -4184.57628632            | -26.4                         | 11.77                         |
| -4185.91179512                    | -48.1                         | -10.00                        | -4185.02618419         | -43.0                         | -4.90                         | -4184.59587831            | -38.7                         | -0.60                         |

$E_{sp}$  ..... single point electronic energy in thf (SMD) in hartree with Def2TZVPP after mass balance

$\Delta E_{sp}$  ... relative single point electronic energy in thf(SMD) in kcal/mol with Def2TZVPP

$\Delta G_{sp}$  ... relative single point free energy in thf(SMD) in kcal/mol ( $\Delta G_{sp} = \Delta E_{sp}/\text{Def2TZVPP} + \Delta G_{corr}$ [level of optimization])

## Single point energies in Figure S9-1 with MN12L and M06L

| MN12L/Def2TZVPP thf(SMD) |                               |                               | M06L/Def2TZVPP thf(SMD) |                               |                               |  |
|--------------------------|-------------------------------|-------------------------------|-------------------------|-------------------------------|-------------------------------|--|
| $E_{sp}$<br>[hartree]    | $\Delta E_{sp}$<br>[kcal/mol] | $\Delta G_{sp}$<br>[kcal/mol] | $E_{sp}$<br>[hartree]   | $\Delta E_{sp}$<br>[kcal/mol] | $\Delta G_{sp}$<br>[kcal/mol] |  |
| -4184.09578035           | -53.2                         | -14.20                        | -4186.17355491          | -50.9                         | -11.82                        |  |
| -4184.07651221           | -41.1                         | -6.00                         | -4186.16363468          | -44.6                         | -9.49                         |  |
| -4184.07982685           | -43.2                         | -5.32                         | -4186.16654711          | -46.5                         | -8.55                         |  |
| -4184.08040263           | -43.6                         | -5.75                         | -4186.16427291          | -45.0                         | -7.20                         |  |
| -4184.07406790           | -39.6                         | -3.13                         | -4186.16052199          | -42.7                         | -6.20                         |  |
| -4184.07418697           | -39.7                         | -2.59                         | -4186.16218559          | -43.7                         | -6.62                         |  |
| -4184.07898340           | -42.7                         | -3.97                         | -4186.16556321          | -45.8                         | -7.11                         |  |
| -4184.09646558           | -53.7                         | -17.62                        | -4186.18370773          | -57.2                         | -21.18                        |  |
| -4184.09204378           | -50.9                         | -14.17                        | -4186.17185800          | -49.8                         | -13.08                        |  |
| -4184.07815797           | -42.2                         | -6.56                         | -4186.16358453          | -44.6                         | -8.99                         |  |
| -4184.07335961           | -39.2                         | -1.83                         | -4186.16003122          | -42.4                         | -5.04                         |  |
| -4184.07182372           | -38.2                         | -1.26                         | -4186.15947407          | -42.0                         | -5.08                         |  |
| -4184.07162081           | -38.1                         | -0.37                         | -4186.15947164          | -42.0                         | -4.32                         |  |
| -4184.06989610           | -37.0                         | 1.53                          | -4186.15930698          | -41.9                         | -3.40                         |  |
| -4184.09188701           | -50.8                         | -13.44                        | -4186.17518565          | -51.9                         | -14.53                        |  |
| -4184.10006582           | -55.9                         | -17.64                        | -4186.17570698          | -52.2                         | -13.93                        |  |
| -4184.08383455           | -45.7                         | -10.82                        | -4186.16707273          | -46.8                         | -11.87                        |  |
| -4184.08530996           | -46.7                         | -10.44                        | -4186.16897149          | -48.0                         | -11.76                        |  |
| -4184.08453602           | -46.2                         | -7.90                         | -4186.16834953          | -47.6                         | -9.31                         |  |
| -4184.07139308           | -37.9                         | -1.22                         | -4186.15800743          | -41.1                         | -4.39                         |  |
| -4184.06815500           | -35.9                         | 0.25                          | -4186.15579507          | -39.7                         | -3.57                         |  |
| -4184.06513221           | -34.0                         | 3.54                          | -4186.15440790          | -38.8                         | -1.30                         |  |
| -4184.10474359           | -58.9                         | -21.85                        | -4186.18657732          | -59.0                         | -22.02                        |  |
| -4184.09450871           | -52.4                         | -12.04                        | -4186.17065932          | -49.0                         | -8.64                         |  |
| -4184.07992575           | -43.3                         | -6.94                         | -4186.16276283          | -44.1                         | -7.74                         |  |
| -4184.07714197           | -41.5                         | -4.09                         | -4186.16202185          | -43.6                         | -6.18                         |  |
| -4184.07023436           | -37.2                         | -0.52                         | -4186.15815813          | -41.2                         | -4.51                         |  |
| -4184.07018213           | -37.2                         | -0.28                         | -4186.15812478          | -41.2                         | -4.29                         |  |
| -4184.07189557           | -38.2                         | -0.39                         | -4186.15970809          | -42.2                         | -4.32                         |  |
| -4184.07148535           | -38.0                         | 0.15                          | -4186.15968428          | -42.2                         | -4.02                         |  |
| -4184.09451422           | -52.4                         | -14.38                        | -4186.17983140          | -54.8                         | -16.74                        |  |

$E_{sp}$  ..... single point electronic energy in thf (SMD) in hartree with Def2TZVPP after mass balance

$\Delta E_{sp}$  ... relative single point electronic energy in thf(SMD) in kcal/mol with Def2TZVPP

$\Delta G_{sp}$  ... relative single point free energy in thf(SMD) in kcal/mol ( $\Delta G_{sp} = \Delta E_{sp}/\text{Def2TZVPP} + \Delta G_{\text{corr}}[\text{level of optimization}]$ )

## Single point energies in Figure S9-1 with BP86-D3BJ and PBE0-D3BJ

| BP86-D3BJ/Def2TZVPP thf(SMD) |                               |                               | PBE0-D3BJ/Def2TZVPP thf(SMD) |                               |                               |
|------------------------------|-------------------------------|-------------------------------|------------------------------|-------------------------------|-------------------------------|
| $E_{sp}$<br>[hartree]        | $\Delta E_{sp}$<br>[kcal/mol] | $\Delta G_{sp}$<br>[kcal/mol] | $E_{sp}$<br>[hartree]        | $\Delta E_{sp}$<br>[kcal/mol] | $\Delta G_{sp}$<br>[kcal/mol] |
| -4187.02900925               | -66.3                         | -27.27                        | -4183.82254398               | -58.1                         | -19.09                        |
| -4187.02131940               | -61.5                         | -26.33                        | -4183.80715459               | -48.5                         | -13.32                        |
| -4187.02472903               | -63.6                         | -25.71                        | -4183.80787586               | -48.9                         | -11.01                        |
| -4187.02371300               | -63.0                         | -25.14                        | -4183.80608925               | -47.8                         | -9.96                         |
| -4187.01902633               | -60.0                         | -23.55                        | -4183.80350648               | -46.2                         | -9.69                         |
| -4187.01875073               | -59.9                         | -22.77                        | -4183.80502074               | -47.1                         | -10.03                        |
| -4187.02299426               | -62.5                         | -23.80                        | -4183.80700581               | -48.4                         | -9.64                         |
| -4187.03554089               | -70.4                         | -34.35                        | -4183.82083167               | -57.0                         | -21.00                        |
| -4187.02643817               | -64.7                         | -27.97                        | -4183.82140071               | -57.4                         | -20.69                        |
| -4187.02045819               | -60.9                         | -25.32                        | -4183.80445544               | -46.8                         | -11.16                        |
| -4187.01745246               | -59.0                         | -21.72                        | -4183.80093560               | -44.6                         | -7.23                         |
| -4187.01578837               | -58.0                         | -21.06                        | -4183.80010592               | -44.0                         | -7.10                         |
| -4187.01756687               | -59.1                         | -21.42                        | -4183.80053039               | -44.3                         | -6.60                         |
| -4187.01549952               | -57.8                         | -19.31                        | -4183.79862949               | -43.1                         | -4.60                         |
| -4187.02511932               | -63.9                         | -26.51                        | -4183.81031186               | -50.4                         | -13.10                        |
| -4187.02974379               | -66.8                         | -28.48                        | -4183.82425684               | -59.2                         | -20.92                        |
| -4187.02408361               | -63.2                         | -28.29                        | -4183.80853130               | -49.3                         | -14.41                        |
| -4187.02631708               | -64.6                         | -28.39                        | -4183.80978345               | -50.1                         | -13.89                        |
| -4187.02569743               | -64.2                         | -25.94                        | -4183.80914504               | -49.7                         | -11.43                        |
| -4187.01581894               | -58.0                         | -21.31                        | -4183.79772735               | -42.5                         | -5.83                         |
| -4187.01322132               | -56.4                         | -20.25                        | -4183.79640673               | -41.7                         | -5.57                         |
| -4187.01069847               | -54.8                         | -17.26                        | -4183.79415606               | -40.3                         | -2.76                         |
| -4187.03718045               | -71.4                         | -34.42                        | -4183.82288955               | -58.3                         | -21.33                        |
| -4187.02655059               | -64.8                         | -24.36                        | -4183.81871413               | -55.7                         | -15.32                        |
| -4187.02224289               | -62.1                         | -25.71                        | -4183.80419929               | -46.6                         | -10.26                        |
| -4187.02028190               | -60.8                         | -23.38                        | -4183.80420674               | -46.6                         | -9.17                         |
| -4187.01544982               | -57.8                         | -21.11                        | -4183.80044444               | -44.3                         | -7.57                         |
| -4187.01544077               | -57.8                         | -20.90                        | -4183.80038728               | -44.2                         | -7.33                         |
| -4187.01816059               | -59.5                         | -21.64                        | -4183.80127233               | -44.8                         | -6.92                         |
| -4187.01790821               | -59.3                         | -21.20                        | -4183.80117513               | -44.7                         | -6.58                         |
| -4187.03362563               | -69.2                         | -31.14                        | -4183.81599402               | -54.0                         | -15.96                        |

$E_{sp}$  ..... single point electronic energy in thf(SMD) in hartree with Def2TZVPP after mass balance

$\Delta E_{sp}$  ... relative single point electronic energy in thf(SMD) in kcal/mol with Def2TZVPP

$\Delta G_{sp}$  ... relative single point free energy in thf(SMD) in kcal/mol ( $\Delta G_{sp} = \Delta E_{sp}/\text{Def2TZVPP} + \Delta G_{\text{corr}}[\text{level of optimization}]$ )

## ■ Coordinates after optimization with M06L/Def2SVP:UFF

26

vinylBpin / electronic energy: -488.860054406 a.u. / lowest freq: 64.97 cm<sup>-1</sup>

|   |           |           |           |
|---|-----------|-----------|-----------|
| B | 1.230595  | -0.336224 | 0.080649  |
| O | 0.272206  | -1.259835 | 0.408633  |
| O | 0.702073  | 0.864867  | -0.320149 |
| C | -1.009372 | -0.710335 | 0.003398  |
| C | -0.716625 | 0.827511  | -0.017968 |
| C | -2.065795 | -1.136809 | 0.998019  |
| C | -1.312568 | -1.271413 | -1.375920 |
| C | -0.895891 | 1.478674  | 1.343519  |
| C | -1.468588 | 1.598127  | -1.080028 |
| H | -0.366786 | 0.923678  | 2.130675  |
| H | -1.955351 | 1.547746  | 1.625181  |
| H | -0.486706 | 2.497284  | 1.318067  |
| H | -1.222125 | 1.253144  | -2.091114 |
| H | -1.220055 | 2.666226  | -1.021534 |
| H | -2.554339 | 1.501095  | -0.937099 |
| H | -0.559001 | -0.960329 | -2.112718 |
| H | -2.298858 | -0.950115 | -1.737432 |
| H | -1.309099 | -2.368613 | -1.334618 |
| H | -3.031269 | -0.664045 | 0.767247  |
| H | -1.791842 | -0.873923 | 2.026745  |
| H | -2.209474 | -2.224761 | 0.956151  |
| H | 4.759177  | 0.082437  | -0.084499 |
| C | 3.685593  | 0.292150  | -0.133096 |
| C | 2.750540  | -0.623311 | 0.156155  |
| H | 3.082869  | -1.625350 | 0.455959  |
| H | 3.411892  | 1.308818  | -0.436603 |

31

allyl\_phosphate / electronic energy: -1069.76845592 a.u. / lowest freq: 24.13 cm<sup>-1</sup>

|   |           |           |           |
|---|-----------|-----------|-----------|
| C | 1.569815  | 1.313754  | -0.235460 |
| C | 2.758927  | 0.483151  | -0.061425 |
| C | 3.934544  | 0.817484  | -0.756391 |
| C | 2.776526  | -0.661179 | 0.758822  |
| C | 5.088790  | 0.049018  | -0.630371 |
| C | 3.928702  | -1.428471 | 0.884204  |
| C | 5.091024  | -1.077222 | 0.191897  |
| H | 5.990834  | 0.328856  | -1.179519 |
| H | 3.921220  | -2.313697 | 1.524509  |
| H | 5.993453  | -1.684683 | 0.291460  |
| C | 0.409603  | 1.218745  | 0.436196  |
| C | -0.779996 | 2.057528  | 0.141576  |
| H | -1.199382 | 2.508570  | 1.055281  |
| H | -0.543590 | 2.864083  | -0.563649 |
| H | 1.872747  | -0.959455 | 1.296652  |
| H | 0.283663  | 0.468915  | 1.227052  |
| P | -2.518293 | 0.083112  | 0.299582  |
| O | -1.597223 | -1.223791 | 0.069553  |
| O | -2.775544 | 0.276407  | 1.744310  |
| O | -3.778564 | -0.099167 | -0.684519 |
| O | -1.825775 | 1.289185  | -0.505208 |
| H | 1.653091  | 2.092060  | -1.005339 |
| H | 3.934746  | 1.698752  | -1.404080 |
| C | -1.098572 | -1.545632 | -1.224636 |
| H | -0.704933 | -2.566496 | -1.177106 |
| H | -1.892732 | -1.501951 | -1.984148 |
| H | -0.288130 | -0.859683 | -1.513302 |
| C | -4.746738 | -1.095503 | -0.365930 |
| H | -5.574656 | -0.977809 | -1.071638 |
| H | -4.326645 | -2.106670 | -0.471986 |
| H | -5.124202 | -0.968594 | 0.658098  |

13

thf / electronic energy: -76.339715260087 a.u. / lowest freq: 27.33 cm<sup>-1</sup>

|   |           |           |           |
|---|-----------|-----------|-----------|
| O | 0.000025  | -1.225546 | -0.212974 |
| C | 1.109558  | -0.458776 | 0.113122  |
| H | 1.412272  | -0.676586 | 1.161824  |
| H | 1.954309  | -0.722409 | -0.558305 |
| C | -1.109537 | -0.458822 | 0.113131  |
| H | -1.954287 | -0.722499 | -0.558278 |
| H | -1.412224 | -0.676633 | 1.161841  |
| C | -0.751551 | 1.007103  | -0.038813 |
| H | -1.140164 | 1.404849  | -1.002354 |
| H | -1.158790 | 1.606421  | 0.804749  |
| C | 0.751507  | 1.007136  | -0.038799 |
| H | 1.158701  | 1.606454  | 0.804786  |
| H | 1.140120  | 1.404924  | -1.002322 |

113

Figure\_S4\_imid-3-Cu-H\_01 / electronic energy: -2884.015986291803 a.u. / lowest freq: 6.42 cm<sup>-1</sup>

|   |          |          |          |
|---|----------|----------|----------|
| C | 2.926015 | 1.508514 | 0.341065 |
| H | 3.299473 | 1.041555 | 1.269943 |
| C | 1.416947 | 1.807489 | 0.392609 |

|    |           |           |           |
|----|-----------|-----------|-----------|
| H  | 1.144219  | 2.688402  | -0.213874 |
| C  | 1.786994  | -0.140666 | -0.892011 |
| C  | 4.188301  | -0.137746 | -1.164701 |
| C  | 4.753290  | 0.331057  | -2.353122 |
| C  | 4.808206  | -1.196242 | -0.477631 |
| C  | 5.925545  | -0.225439 | -2.856687 |
| H  | 4.244808  | 1.132814  | -2.891730 |
| C  | 5.982306  | -1.752685 | -0.990776 |
| C  | 6.542180  | -1.269752 | -2.171553 |
| H  | 6.350378  | 0.152785  | -3.788728 |
| H  | 6.446018  | -2.578858 | -0.448947 |
| H  | 7.460401  | -1.717031 | -2.558286 |
| C  | -0.511639 | 0.292304  | -0.306024 |
| C  | -1.442613 | 1.288039  | -0.641091 |
| C  | -0.966955 | -0.988770 | 0.040575  |
| C  | -2.813441 | 1.001782  | -0.637856 |
| C  | -2.339608 | -1.265819 | 0.068372  |
| C  | -3.260782 | -0.272926 | -0.278425 |
| H  | -4.323182 | -0.487889 | -0.256442 |
| S  | 4.191474  | -1.847559 | 1.088771  |
| O  | 4.832043  | -3.187479 | 1.212202  |
| O  | 2.709339  | -2.010074 | 0.930214  |
| O  | 4.579280  | -0.862194 | 2.111851  |
| Cu | 1.817155  | -1.982425 | -1.471365 |
| C  | 3.768402  | 2.709962  | -0.001863 |
| C  | 4.758929  | 3.153557  | 0.891944  |
| C  | 3.589384  | 3.395237  | -1.218327 |
| C  | 5.552586  | 4.260099  | 0.575007  |
| H  | 4.919046  | 2.643961  | 1.833988  |
| C  | 4.386160  | 4.500166  | -1.531136 |
| H  | 2.839019  | 3.068884  | -1.927570 |
| C  | 5.366691  | 4.932604  | -0.635229 |
| H  | 6.313263  | 4.595650  | 1.267990  |
| H  | 4.244528  | 5.020119  | -2.469731 |
| H  | 5.983160  | 5.788084  | -0.879181 |
| C  | 0.900602  | 1.985993  | 1.798252  |
| C  | 0.363904  | 3.221206  | 2.201465  |
| C  | 0.926061  | 0.919461  | 2.717149  |
| C  | -0.130746 | 3.386808  | 3.498391  |
| H  | 0.328781  | 4.057414  | 1.514337  |
| C  | 0.425334  | 1.089009  | 4.010660  |
| H  | 1.327014  | -0.043924 | 2.430392  |
| C  | -0.104327 | 2.320964  | 4.400666  |
| H  | -0.537870 | 4.342168  | 3.803053  |
| H  | 0.450505  | 0.265418  | 4.711860  |
| H  | -0.491834 | 2.450597  | 5.402814  |
| N  | 2.979789  | 0.468349  | -0.711892 |
| N  | 0.869409  | 0.592970  | -0.247225 |
| H  | -0.257794 | -1.754380 | 0.331464  |
| H  | -1.105552 | 2.281165  | -0.910151 |
| C  | -2.823027 | -2.583429 | 0.517363  |
| C  | -3.126207 | -3.593223 | -0.437293 |
| C  | -3.028782 | -2.824117 | 1.904746  |
| C  | -3.628453 | -4.826435 | 0.016882  |
| C  | -3.525820 | -4.076834 | 2.308427  |
| C  | -3.820745 | -5.063729 | 1.373802  |
| H  | -3.878372 | -5.613092 | -0.682758 |
| H  | -3.697594 | -4.292474 | 3.354763  |
| H  | -4.207988 | -6.019230 | 1.703751  |
| C  | -3.791394 | 2.042404  | -1.002420 |
| C  | -4.343051 | 2.881654  | 0.005103  |
| C  | -4.215249 | 2.173070  | -2.354275 |
| C  | -5.310161 | 3.835364  | -0.362349 |
| C  | -5.181012 | 3.145695  | -2.671045 |
| C  | -5.719236 | 3.965764  | -1.685227 |
| H  | -5.759310 | 4.482073  | 0.379743  |
| H  | -5.529086 | 3.268499  | -3.688214 |
| H  | -6.464955 | 4.705157  | -1.947938 |
| C  | -3.667902 | 1.279269  | -3.468049 |
| H  | -2.902539 | 0.576986  | -3.079857 |
| C  | -2.966652 | 2.107359  | -4.551896 |
| H  | -2.175527 | 2.738751  | -4.093533 |
| H  | -2.485777 | 1.433352  | -5.292795 |
| H  | -3.684182 | 2.762210  | -5.089360 |
| C  | -4.776863 | 0.407017  | -4.068384 |
| H  | -5.270852 | -0.182026 | -3.266147 |
| H  | -5.541579 | 1.025409  | -4.583909 |
| H  | -4.344853 | -0.305213 | -4.803635 |
| C  | -3.936017 | 2.763428  | 1.474688  |
| H  | -3.142114 | 2.001118  | 1.612632  |
| C  | -5.119223 | 2.305745  | 2.335179  |
| H  | -4.784357 | 2.129209  | 3.379819  |
| H  | -5.926758 | 3.067894  | 2.346890  |
| H  | -5.529259 | 1.352448  | 1.938062  |
| C  | -3.348628 | 4.079468  | 1.998821  |
| H  | -2.992610 | 3.945385  | 3.042072  |
| H  | -2.484179 | 4.384906  | 1.371194  |
| H  | -4.103670 | 4.892968  | 1.993655  |

|    |           |           |           |
|----|-----------|-----------|-----------|
| C  | -2.750166 | -1.757683 | 2.966332  |
| H  | -2.359766 | -0.825455 | 2.510004  |
| C  | -2.937294 | -3.374560 | -1.938671 |
| H  | -2.495753 | -2.378466 | -2.145922 |
| C  | -1.961063 | -4.397619 | -2.532875 |
| H  | -1.003146 | -4.378135 | -1.970780 |
| H  | -2.378656 | -5.425618 | -2.496458 |
| H  | -1.746344 | -4.145489 | -3.593393 |
| C  | -4.283923 | -3.405403 | -2.670680 |
| H  | -4.754738 | -4.408979 | -2.604950 |
| H  | -4.972834 | -2.654928 | -2.227039 |
| H  | -4.140374 | -3.151592 | -3.742810 |
| C  | -1.674089 | -2.224333 | 3.953816  |
| H  | -2.010347 | -3.111068 | 4.530779  |
| H  | -0.742961 | -2.481515 | 3.404755  |
| H  | -1.439922 | -1.410408 | 4.672120  |
| C  | -4.037285 | -1.358814 | 3.697982  |
| H  | -4.804224 | -1.031937 | 2.963468  |
| H  | -4.443488 | -2.205345 | 4.290607  |
| H  | -3.835801 | -0.510686 | 4.387010  |
| Na | 2.806457  | -4.337068 | 0.315215  |
| H  | 1.904808  | -3.499469 | -1.869644 |

113

Figure\_S4\_imid-3-Cu-H\_02 / electronic energy: -2884.015986317998 a.u. / lowest freq: 6.42 cm<sup>-1</sup>

|    |           |           |           |
|----|-----------|-----------|-----------|
| C  | 2.926014  | 1.508517  | 0.341064  |
| H  | 3.299470  | 1.041560  | 1.269943  |
| C  | 1.416946  | 1.807493  | 0.392605  |
| H  | 1.144219  | 2.688406  | -0.213880 |
| C  | 1.786996  | -0.140663 | -0.892014 |
| C  | 4.188303  | -0.137745 | -1.164697 |
| C  | 4.753296  | 0.331055  | -2.353117 |
| C  | 4.808206  | -1.196239 | -0.477623 |
| C  | 5.925552  | -0.225443 | -2.856678 |
| H  | 4.244815  | 1.132811  | -2.891729 |
| C  | 5.982308  | -1.752683 | -0.990763 |
| C  | 6.542185  | -1.269753 | -2.171540 |
| H  | 6.350387  | 0.152780  | -3.788719 |
| H  | 6.446018  | -2.578855 | -0.448931 |
| H  | 7.460407  | -1.717033 | -2.558269 |
| C  | -0.511639 | 0.292306  | -0.306028 |
| C  | -0.966952 | -0.988771 | 0.040565  |
| C  | -1.442615 | 1.288041  | -0.641088 |
| C  | -2.339604 | -1.265822 | 0.068363  |
| C  | -2.813443 | 1.001782  | -0.637851 |
| C  | -3.260781 | -0.272928 | -0.278427 |
| H  | -4.323180 | -0.487893 | -0.256443 |
| S  | 4.191470  | -1.847553 | 1.088779  |
| O  | 4.832037  | -3.187474 | 1.212213  |
| O  | 2.709334  | -2.010067 | 0.930219  |
| O  | 4.579274  | -0.862188 | 2.111859  |
| Cu | 1.817156  | -1.982423 | -1.471365 |
| C  | 3.768402  | 2.709965  | -0.001864 |
| C  | 4.758927  | 3.153561  | 0.891945  |
| C  | 3.589387  | 3.395239  | -1.218329 |
| C  | 5.552585  | 4.260102  | 0.575009  |
| H  | 4.919042  | 2.643966  | 1.833990  |
| C  | 4.386164  | 4.500168  | -1.531137 |
| H  | 2.839024  | 3.068885  | -1.927573 |
| C  | 5.366693  | 4.932606  | -0.635229 |
| H  | 6.313261  | 4.595654  | 1.267994  |
| H  | 4.244535  | 5.020119  | -2.469733 |
| H  | 5.983163  | 5.788086  | -0.879180 |
| C  | 0.900598  | 1.985998  | 1.798246  |
| C  | 0.363898  | 3.221211  | 2.201457  |
| C  | 0.926056  | 0.919467  | 2.717143  |
| C  | -0.130756 | 3.386812  | 3.498381  |
| H  | 0.328775  | 4.057418  | 1.514328  |
| C  | 0.425325  | 1.089014  | 4.010653  |
| H  | 1.327010  | -0.043919 | 2.430387  |
| C  | -0.104339 | 2.320969  | 4.400657  |
| H  | -0.537882 | 4.342172  | 3.803041  |
| H  | 0.450493  | 0.265424  | 4.711853  |
| H  | -0.491850 | 2.450602  | 5.402803  |
| N  | 2.979790  | 0.468352  | -0.711892 |
| N  | 0.869409  | 0.592973  | -0.247230 |
| H  | -1.105556 | 2.281170  | -0.910143 |
| H  | -0.257789 | -1.754381 | 0.331449  |
| C  | -3.791398 | 2.042405  | -1.002406 |
| C  | -4.343064 | 2.881639  | 0.005125  |
| C  | -4.215246 | 2.173088  | -2.354262 |
| C  | -5.310174 | 3.835351  | -0.362320 |
| C  | -5.181010 | 3.145714  | -2.671024 |
| C  | -5.719242 | 3.965768  | -1.685199 |
| H  | -5.759330 | 4.482048  | 0.379779  |
| H  | -5.529079 | 3.268530  | -3.688194 |
| H  | -6.464961 | 4.705163  | -1.947903 |
| C  | -2.823021 | -2.583436 | 0.517346  |
| C  | -3.126202 | -3.593224 | -0.437316 |

|    |           |           |           |
|----|-----------|-----------|-----------|
| C  | -3.028771 | -2.824135 | 1.904728  |
| C  | -3.628446 | -4.826439 | 0.016852  |
| C  | -3.525806 | -4.076855 | 2.308402  |
| C  | -3.820732 | -5.063743 | 1.373771  |
| H  | -3.878366 | -5.613092 | -0.682793 |
| H  | -3.697576 | -4.292502 | 3.354737  |
| H  | -4.207974 | -6.019247 | 1.703714  |
| C  | -2.750151 | -1.757708 | 2.966321  |
| H  | -2.359754 | -0.825475 | 2.509999  |
| C  | -1.674069 | -2.224364 | 3.953796  |
| H  | -0.742944 | -2.481542 | 3.404729  |
| H  | -1.439898 | -1.410443 | 4.672104  |
| H  | -2.010324 | -3.111103 | 4.530755  |
| C  | -4.037267 | -1.358846 | 3.697980  |
| H  | -4.804210 | -1.031964 | 2.963472  |
| H  | -4.443467 | -2.205382 | 4.290600  |
| H  | -3.835781 | -0.510723 | 4.387013  |
| C  | -2.937292 | -3.374550 | -1.938693 |
| H  | -2.495751 | -2.378455 | -2.145938 |
| C  | -4.283924 | -3.405387 | -2.670698 |
| H  | -4.140377 | -3.151570 | -3.742828 |
| H  | -4.754739 | -4.408963 | -2.604973 |
| H  | -4.972833 | -2.654914 | -2.227051 |
| C  | -1.961064 | -4.397605 | -2.532907 |
| H  | -1.746348 | -4.145468 | -3.593424 |
| H  | -1.003145 | -4.378126 | -1.970814 |
| H  | -2.378657 | -5.425604 | -2.496497 |
| C  | -3.667891 | 1.279302  | -3.468044 |
| H  | -2.902528 | 0.577016  | -3.079857 |
| C  | -3.936038 | 2.763394  | 1.474711  |
| H  | -3.142135 | 2.001084  | 1.612650  |
| C  | -3.348655 | 4.079428  | 1.998865  |
| H  | -2.484204 | 4.384876  | 1.371247  |
| H  | -4.103699 | 4.892926  | 1.993706  |
| H  | -2.992642 | 3.945331  | 3.042116  |
| C  | -5.119248 | 2.305697  | 2.335189  |
| H  | -5.926786 | 3.067844  | 2.346906  |
| H  | -5.529280 | 1.352405  | 1.938056  |
| H  | -4.784389 | 2.129147  | 3.379828  |
| C  | -2.966637 | 2.107408  | -4.551877 |
| H  | -3.684166 | 2.762265  | -5.089336 |
| H  | -2.175516 | 2.738796  | -4.093502 |
| H  | -2.485756 | 1.433412  | -5.292782 |
| C  | -4.776846 | 0.407056  | -4.068397 |
| H  | -5.270837 | -0.182000 | -3.266170 |
| H  | -5.541562 | 1.025452  | -4.583917 |
| H  | -4.344831 | -0.305163 | -4.803655 |
| Na | 2.806453  | -4.337063 | 0.315221  |
| H  | 1.904804  | -3.499468 | -1.869641 |

113

Figure\_S4\_imid-3-Cu-H\_03 / electronic energy: -2884.016426363786 a.u. / lowest freq: 13.84 cm<sup>-1</sup>

|    |           |           |           |
|----|-----------|-----------|-----------|
| C  | -2.937124 | -1.629721 | 0.161149  |
| H  | -3.308068 | -1.253393 | 1.131131  |
| C  | -1.424472 | -1.924910 | 0.178573  |
| H  | -1.156948 | -2.791409 | -0.449930 |
| C  | -1.816713 | 0.091785  | -0.994282 |
| C  | -4.229195 | 0.187005  | -1.082788 |
| C  | -4.947921 | -0.168595 | -2.227402 |
| C  | -4.715125 | 1.219647  | -0.259681 |
| C  | -6.136583 | 0.477929  | -2.556545 |
| H  | -4.548112 | -0.953636 | -2.872222 |
| C  | -5.907353 | 1.862861  | -0.597405 |
| C  | -6.618328 | 1.495581  | -1.737258 |
| H  | -6.680560 | 0.188399  | -3.457964 |
| H  | -6.267016 | 2.663842  | 0.050250  |
| H  | -7.548307 | 2.011436  | -1.985823 |
| C  | 0.497268  | -0.353381 | -0.442720 |
| C  | 0.894569  | 0.972123  | -0.199655 |
| C  | 1.482171  | -1.345392 | -0.592274 |
| C  | 2.250647  | 1.299062  | -0.093644 |
| C  | 2.840918  | -1.012547 | -0.502153 |
| C  | 3.222629  | 0.308388  | -0.250610 |
| H  | 4.273019  | 0.562052  | -0.162697 |
| S  | -3.918715 | 1.739996  | 1.278794  |
| O  | -4.517292 | 3.073445  | 1.570489  |
| O  | -2.459604 | 1.904360  | 0.977851  |
| O  | -4.217799 | 0.683991  | 2.260059  |
| Cu | -1.819914 | 1.963943  | -1.475440 |
| C  | -3.769133 | -2.803491 | -0.286426 |
| C  | -4.736328 | -3.351733 | 0.574003  |
| C  | -3.598808 | -3.361225 | -1.567516 |
| C  | -5.515796 | -4.436493 | 0.160859  |
| H  | -4.887753 | -2.941940 | 1.564858  |
| C  | -4.381106 | -4.444988 | -1.976234 |
| H  | -2.865174 | -2.952170 | -2.251089 |
| C  | -5.338528 | -4.982568 | -1.112767 |
| H  | -6.258155 | -4.853871 | 0.828795  |
| H  | -4.245712 | -4.867366 | -2.963483 |



|    |           |           |           |
|----|-----------|-----------|-----------|
| H  | -5.943429 | -5.821866 | -1.430709 |
| C  | -0.898701 | -2.140969 | 1.576880  |
| C  | -0.437166 | -3.409740 | 1.968256  |
| C  | -0.856980 | -1.082995 | 2.505073  |
| C  | 0.049876  | -3.615870 | 3.262211  |
| H  | -0.458398 | -4.241372 | 1.275104  |
| C  | -0.355017 | -1.290705 | 3.792438  |
| H  | -1.203168 | -0.096622 | 2.229479  |
| C  | 0.096677  | -2.556468 | 4.171412  |
| H  | 0.400590  | -4.596294 | 3.557417  |
| H  | -0.318963 | -0.470735 | 4.497591  |
| H  | 0.483581  | -2.716631 | 5.169358  |
| N  | -3.012910 | -0.501870 | -0.794819 |
| N  | -0.879776 | -0.696465 | -0.446557 |
| H  | 1.197721  | -2.373883 | -0.775082 |
| H  | 0.152163  | 1.742936  | -0.039176 |
| C  | 3.878767  | -2.049079 | -0.651855 |
| C  | 4.419693  | -2.681284 | 0.502500  |
| C  | 4.400391  | -2.347537 | -1.941363 |
| C  | 5.483740  | -3.587959 | 0.342769  |
| C  | 5.453441  | -3.274220 | -2.049232 |
| C  | 5.987670  | -3.883581 | -0.919172 |
| H  | 5.935941  | -4.067693 | 1.200534  |
| H  | 5.878683  | -3.518324 | -3.013784 |
| H  | 6.805638  | -4.585204 | -1.021537 |
| C  | 2.652557  | 2.675181  | 0.247294  |
| C  | 3.063576  | 3.571522  | -0.777772 |
| C  | 2.629093  | 3.101022  | 1.604999  |
| C  | 3.442590  | 4.878966  | -0.422406 |
| C  | 3.002889  | 4.423256  | 1.906543  |
| C  | 3.406699  | 5.298175  | 0.903431  |
| H  | 3.765520  | 5.585025  | -1.176098 |
| H  | 2.988704  | 4.782587  | 2.927094  |
| H  | 3.696442  | 6.310097  | 1.156141  |
| C  | 2.218771  | 2.165538  | 2.744723  |
| H  | 1.986860  | 1.148432  | 2.368920  |
| C  | 0.943800  | 2.664448  | 3.434162  |
| H  | 0.126376  | 2.765736  | 2.688644  |
| H  | 0.618286  | 1.935683  | 4.206562  |
| H  | 1.108635  | 3.646760  | 3.924740  |
| C  | 3.359380  | 1.982662  | 3.753467  |
| H  | 4.277072  | 1.639503  | 3.229494  |
| H  | 3.582223  | 2.929307  | 4.288922  |
| H  | 3.081841  | 1.211963  | 4.504273  |
| C  | 3.102898  | 3.159857  | -2.250025 |
| H  | 2.753483  | 2.116071  | -2.384598 |
| C  | 4.535210  | 3.201896  | -2.795280 |
| H  | 4.558699  | 2.807067  | -3.833604 |
| H  | 4.933295  | 4.238445  | -2.803039 |
| H  | 5.197250  | 2.566137  | -2.168999 |
| C  | 2.162552  | 4.027993  | -3.095375 |
| H  | 2.128693  | 3.646317  | -4.138265 |
| H  | 1.133089  | 3.988038  | -2.678748 |
| H  | 2.500513  | 5.085198  | -3.121011 |
| C  | 3.874898  | -1.670003 | -3.207424 |
| H  | 3.029999  | -0.989774 | -2.977374 |
| C  | 3.902965  | -2.380701 | 1.910297  |
| H  | 3.005498  | -1.729226 | 1.876333  |
| C  | 3.460732  | -3.659302 | 2.633513  |
| H  | 2.719329  | -4.208076 | 2.014416  |
| H  | 4.320783  | -4.328554 | 2.843188  |
| H  | 2.984701  | -3.399445 | 3.602741  |
| C  | 4.956803  | -1.623995 | 2.725852  |
| H  | 5.862115  | -2.247034 | 2.886271  |
| H  | 5.249994  | -0.693293 | 2.194399  |
| H  | 4.540573  | -1.339658 | 3.716069  |
| C  | 3.325635  | -2.699024 | -4.203355 |
| H  | 4.131247  | -3.355118 | -4.594505 |
| H  | 2.554503  | -3.329105 | -3.710435 |
| H  | 2.850607  | -2.179196 | -5.062723 |
| C  | 4.958135  | -0.797472 | -3.852639 |
| H  | 5.335274  | -0.056221 | -3.115607 |
| H  | 5.809560  | -1.412738 | -4.212599 |
| H  | 4.534727  | -0.240956 | -4.716008 |
| Na | -2.607474 | 4.258453  | 0.457739  |
| H  | -1.861473 | 3.502791  | -1.792123 |

139

Figure\_S4\_imid-3\_modeS1\_ed(CuHadd) / electronic energy: -3372.921349842059 a.u. / lowest freq: 11.86 cm<sup>-1</sup>

|   |           |           |           |
|---|-----------|-----------|-----------|
| C | -1.910181 | -2.643302 | 0.668179  |
| H | -2.569047 | -2.440681 | 1.523400  |
| C | -0.428825 | -2.298818 | 0.948923  |
| H | 0.227997  | -3.171972 | 0.811051  |
| C | -1.211337 | -0.929097 | -0.819408 |
| C | -3.461465 | -1.722077 | -1.154995 |
| C | -3.376351 | -1.897839 | -2.543890 |
| C | -4.727901 | -1.573274 | -0.565166 |
| C | -4.518252 | -1.932742 | -3.336494 |
| H | -2.384873 | -2.009361 | -2.991843 |

|    |           |           |           |
|----|-----------|-----------|-----------|
| C  | -5.871677 | -1.638699 | -1.366746 |
| C  | -5.775011 | -1.821504 | -2.743373 |
| H  | -4.423419 | -2.064189 | -4.416460 |
| H  | -6.844429 | -1.508550 | -0.889169 |
| H  | -6.680598 | -1.864353 | -3.351995 |
| C  | 1.129432  | -0.705244 | -0.248368 |
| C  | 2.267071  | -1.521261 | -0.345293 |
| C  | 1.283207  | 0.687173  | -0.198146 |
| C  | 3.545257  | -0.951449 | -0.381140 |
| C  | 2.564695  | 1.255648  | -0.205768 |
| C  | 3.693176  | 0.436474  | -0.309934 |
| H  | 4.684139  | 0.876165  | -0.307283 |
| S  | -4.953348 | -1.147926 | 1.168695  |
| O  | -6.298522 | -0.498184 | 1.216323  |
| O  | -3.887320 | -0.138823 | 1.447807  |
| O  | -4.851738 | -2.387662 | 1.955744  |
| Cu | -1.439098 | 0.347256  | -2.318869 |
| C  | -2.095449 | -4.074589 | 0.220506  |
| C  | -2.870870 | -4.964190 | 0.984847  |
| C  | -1.495103 | -4.538529 | -0.965865 |
| C  | -3.050376 | -6.285726 | 0.565321  |
| H  | -3.332238 | -4.640365 | 1.908536  |
| C  | -1.678150 | -5.860307 | -1.381266 |
| H  | -0.888219 | -3.875579 | -1.569705 |
| C  | -2.456316 | -6.732932 | -0.617208 |
| H  | -3.649433 | -6.964226 | 1.158815  |
| H  | -1.216099 | -6.208153 | -2.296073 |
| H  | -2.596871 | -7.756384 | -0.939972 |
| C  | -0.195624 | -1.727226 | 2.327258  |
| C  | 0.622571  | -2.406542 | 3.246802  |
| C  | -0.742273 | -0.482284 | 2.690929  |
| C  | 0.888866  | -1.850270 | 4.501653  |
| H  | 1.060225  | -3.363270 | 2.991920  |
| C  | -0.477075 | 0.067910  | 3.947352  |
| H  | -1.355018 | 0.071855  | 1.994094  |
| C  | 0.340201  | -0.614094 | 4.851362  |
| H  | 1.523859  | -2.376767 | 5.202291  |
| H  | -0.896714 | 1.028957  | 4.215544  |
| H  | 0.550928  | -0.183146 | 5.821487  |
| N  | -2.247688 | -1.698529 | -0.426606 |
| N  | -0.149289 | -1.288652 | -0.088515 |
| H  | 0.410665  | 1.318965  | -0.100412 |
| H  | 2.162888  | -2.598403 | -0.381717 |
| C  | 2.733263  | 2.708000  | -0.024381 |
| C  | 2.665157  | 3.577964  | -1.147029 |
| C  | 2.975382  | 3.234050  | 1.276776  |
| C  | 2.798458  | 4.962896  | -0.940094 |
| C  | 3.106126  | 4.626401  | 1.429591  |
| C  | 3.008695  | 5.478123  | 0.334460  |
| H  | 2.747227  | 5.653531  | -1.771416 |
| H  | 3.291551  | 5.060964  | 2.402886  |
| H  | 3.110721  | 6.546810  | 0.472835  |
| C  | 4.740378  | -1.812174 | -0.442804 |
| C  | 5.280451  | -2.361428 | 0.753839  |
| C  | 5.371039  | -2.062053 | -1.693262 |
| C  | 6.441009  | -3.152616 | 0.672580  |
| C  | 6.534343  | -2.852803 | -1.719887 |
| C  | 7.058489  | -3.392616 | -0.550251 |
| H  | 6.879988  | -3.583377 | 1.562844  |
| H  | 7.044261  | -3.055025 | -2.652568 |
| H  | 7.953655  | -3.999903 | -0.591414 |
| C  | 4.828399  | -1.493700 | -3.005121 |
| H  | 3.888654  | -0.928811 | -2.839110 |
| C  | 4.473958  | -2.612280 | -3.993168 |
| H  | 3.770002  | -3.328708 | -3.517984 |
| H  | 3.978186  | -2.183209 | -4.890121 |
| H  | 5.379213  | -3.162708 | -4.324847 |
| C  | 5.818823  | -0.501028 | -3.624728 |
| H  | 6.051826  | 0.305216  | -2.896346 |
| H  | 6.763478  | -1.005338 | -3.918660 |
| H  | 5.372929  | -0.031978 | -4.527859 |
| C  | 4.651368  | -2.104941 | 2.124649  |
| H  | 3.745600  | -1.470781 | 2.040933  |
| C  | 5.615284  | -1.340965 | 3.039944  |
| H  | 5.103226  | -1.067880 | 3.987489  |
| H  | 6.508560  | -1.952677 | 3.286215  |
| H  | 5.946394  | -0.404188 | 2.542920  |
| C  | 4.191609  | -3.414492 | 2.776391  |
| H  | 3.662299  | -3.199523 | 3.728930  |
| H  | 3.488653  | -3.946713 | 2.100264  |
| H  | 5.051689  | -4.080337 | 2.998381  |
| C  | 3.122334  | 2.334144  | 2.506934  |
| H  | 2.966845  | 1.267489  | 2.247435  |
| C  | 2.481906  | 3.053087  | -2.571099 |
| H  | 2.384911  | 1.948555  | -2.581525 |
| C  | 1.196565  | 3.597937  | -3.202273 |
| H  | 0.333031  | 3.358968  | -2.550070 |
| H  | 1.247608  | 4.697767  | -3.344267 |

|    |           |           |           |
|----|-----------|-----------|-----------|
| H  | 1.025678  | 3.122014  | -4.191435 |
| C  | 3.704120  | 3.376036  | -3.438818 |
| H  | 3.825004  | 4.471501  | -3.574037 |
| H  | 4.622721  | 2.967178  | -2.965559 |
| H  | 3.594064  | 2.907680  | -4.440312 |
| C  | 2.071279  | 2.657674  | 3.575363  |
| H  | 2.188934  | 3.690318  | 3.964567  |
| H  | 1.053988  | 2.544215  | 3.150064  |
| H  | 2.165062  | 1.950053  | 4.426749  |
| C  | 4.539019  | 2.428610  | 3.084933  |
| H  | 5.285499  | 2.184991  | 2.298798  |
| H  | 4.747006  | 3.446962  | 3.475737  |
| H  | 4.661027  | 1.700661  | 3.915364  |
| C  | -3.033472 | 1.643101  | -2.021138 |
| C  | -2.449277 | 1.739994  | -3.304060 |
| H  | -1.786052 | 2.575577  | -3.549741 |
| B  | -2.759472 | 2.684080  | -0.929658 |
| O  | -1.677600 | 3.528101  | -0.918659 |
| O  | -3.633970 | 2.969818  | 0.120521  |
| C  | -1.712161 | 4.294343  | 0.305730  |
| C  | -3.225995 | 4.252144  | 0.678750  |
| C  | -0.847049 | 3.572507  | 1.321105  |
| H  | 0.170273  | 3.490459  | 0.924654  |
| H  | -0.790867 | 4.118567  | 2.272239  |
| H  | -1.218789 | 2.558010  | 1.522911  |
| C  | -1.163872 | 5.676718  | 0.029708  |
| H  | -1.246830 | 6.318355  | 0.918280  |
| H  | -0.100492 | 5.610109  | -0.234546 |
| H  | -1.683471 | 6.167206  | -0.801905 |
| C  | -4.034021 | 5.325082  | -0.030262 |
| H  | -3.823824 | 6.323785  | 0.375772  |
| H  | -3.822322 | 5.340877  | -1.108247 |
| H  | -5.107224 | 5.133018  | 0.099887  |
| C  | -3.504134 | 4.260924  | 2.166176  |
| H  | -3.087500 | 3.378984  | 2.669725  |
| H  | -3.069303 | 5.154413  | 2.636459  |
| H  | -4.584497 | 4.297704  | 2.367229  |
| Na | -5.311640 | 1.704798  | 1.224120  |
| H  | -2.916887 | 1.262052  | -4.171788 |
| H  | -3.927202 | 1.012054  | -1.921644 |
| H  | -0.421684 | -0.031021 | -3.475427 |

139

Figure\_S4\_imid-3\_modeS1\_ts(CuHadd)\_01 / electronic energy: -3372.907503843620 a.u. / lowest freq: -764.65 cm-1

|    |           |           |           |
|----|-----------|-----------|-----------|
| C  | -1.848808 | -2.810909 | 0.514021  |
| H  | -2.468142 | -2.597214 | 1.397725  |
| C  | -0.345704 | -2.529292 | 0.748385  |
| H  | 0.287594  | -3.351189 | 0.375204  |
| C  | -1.190936 | -0.949593 | -0.799985 |
| C  | -3.415529 | -1.764292 | -1.237351 |
| C  | -3.369705 | -1.887729 | -2.632964 |
| C  | -4.656497 | -1.570356 | -0.609900 |
| C  | -4.531390 | -1.841738 | -3.395889 |
| H  | -2.395048 | -2.026502 | -3.107690 |
| C  | -5.821816 | -1.552353 | -1.381924 |
| C  | -5.766272 | -1.693323 | -2.765765 |
| H  | -4.471188 | -1.938217 | -4.481991 |
| H  | -6.775223 | -1.390929 | -0.875569 |
| H  | -6.687235 | -1.673119 | -3.352188 |
| C  | 1.130886  | -0.691082 | -0.187446 |
| C  | 2.286568  | -1.448974 | -0.435075 |
| C  | 1.245635  | 0.689633  | 0.023793  |
| C  | 3.543888  | -0.833190 | -0.458222 |
| C  | 2.506853  | 1.300879  | 0.022303  |
| C  | 3.653491  | 0.539972  | -0.222276 |
| H  | 4.629013  | 1.012953  | -0.217425 |
| S  | -4.806341 | -1.204624 | 1.145735  |
| O  | -6.099247 | -0.462453 | 1.253923  |
| O  | -3.662178 | -0.291099 | 1.443939  |
| O  | -4.777083 | -2.485288 | 1.870762  |
| Cu | -1.565878 | 0.469732  | -2.029573 |
| C  | -2.110196 | -4.221845 | 0.046654  |
| C  | -2.867578 | -5.102979 | 0.838127  |
| C  | -1.602031 | -4.675456 | -1.185632 |
| C  | -3.119459 | -6.406849 | 0.400849  |
| H  | -3.259428 | -4.785458 | 1.795806  |
| C  | -1.857335 | -5.979496 | -1.618726 |
| H  | -1.012084 | -4.017354 | -1.811492 |
| C  | -2.616510 | -6.844202 | -0.826884 |
| H  | -3.704237 | -7.079170 | 1.015230  |
| H  | -1.466452 | -6.319605 | -2.568939 |
| H  | -2.813280 | -7.853822 | -1.163541 |
| C  | -0.009503 | -2.268149 | 2.195660  |
| C  | 0.847408  | -3.137799 | 2.892823  |
| C  | -0.512036 | -1.130591 | 2.855106  |
| C  | 1.190734  | -2.875249 | 4.222600  |
| H  | 1.252625  | -4.017284 | 2.408496  |
| C  | -0.167647 | -0.873849 | 4.184519  |
| H  | -1.156957 | -0.435064 | 2.335117  |

|   |           |           |           |
|---|-----------|-----------|-----------|
| C | 0.685172  | -1.743813 | 4.867240  |
| H | 1.850610  | -3.548927 | 4.753551  |
| H | -0.557419 | 0.003881  | 4.683479  |
| H | 0.954666  | -1.540963 | 5.895586  |
| N | -2.185187 | -1.826297 | -0.538373 |
| N | -0.128438 | -1.324203 | -0.071478 |
| H | 0.360452  | 1.274962  | 0.235163  |
| H | 2.214348  | -2.515098 | -0.608015 |
| C | 2.637788  | 2.731920  | 0.343491  |
| C | 2.664868  | 3.696275  | -0.701258 |
| C | 2.734733  | 3.143637  | 1.702372  |
| C | 2.752782  | 5.058856  | -0.362800 |
| C | 2.819698  | 4.518486  | 1.988341  |
| C | 2.821499  | 5.462159  | 0.966555  |
| H | 2.769548  | 5.819578  | -1.132025 |
| H | 2.889129  | 4.867468  | 3.010116  |
| H | 2.886377  | 6.515597  | 1.206728  |
| C | 4.758681  | -1.630369 | -0.706802 |
| C | 5.384857  | -2.322733 | 0.367082  |
| C | 5.327848  | -1.666392 | -2.010421 |
| C | 6.571899  | -3.034382 | 0.113603  |
| C | 6.517785  | -2.389488 | -2.210962 |
| C | 7.128752  | -3.065621 | -1.160447 |
| H | 7.078943  | -3.565242 | 0.908491  |
| H | 6.982220  | -2.430116 | -3.187424 |
| H | 8.044544  | -3.615934 | -1.334508 |
| C | 4.692158  | -0.938159 | -3.195688 |
| H | 3.741951  | -0.447433 | -2.902446 |
| C | 4.326400  | -1.915364 | -4.320071 |
| H | 3.676602  | -2.724326 | -3.922645 |
| H | 3.766766  | -1.382631 | -5.118502 |
| H | 5.232094  | -2.370242 | -4.773123 |
| C | 5.608374  | 0.178522  | -3.709297 |
| H | 5.856594  | 0.875393  | -2.880275 |
| H | 6.550841  | -0.234323 | -4.126881 |
| H | 5.093111  | 0.757919  | -4.505079 |
| C | 4.821875  | -2.299943 | 1.789319  |
| H | 3.875854  | -1.723755 | 1.839781  |
| C | 5.789608  | -1.604057 | 2.753406  |
| H | 5.325433  | -1.514047 | 3.758933  |
| H | 6.738353  | -2.172413 | 2.852427  |
| H | 6.018365  | -0.580472 | 2.386163  |
| C | 4.479787  | -3.714392 | 2.273352  |
| H | 3.992109  | -3.667170 | 3.269761  |
| H | 3.774400  | -4.197001 | 1.563423  |
| H | 5.389474  | -4.344282 | 2.361965  |
| C | 2.764114  | 2.139731  | 2.857160  |
| H | 2.696736  | 1.096476  | 2.487178  |
| C | 2.611426  | 3.297791  | -2.176424 |
| H | 2.541125  | 2.197160  | -2.292708 |
| C | 1.367933  | 3.874152  | -2.861420 |
| H | 0.459114  | 3.543139  | -2.319843 |
| H | 1.392167  | 4.983842  | -2.882149 |
| H | 1.301387  | 3.503011  | -3.906433 |
| C | 3.891350  | 3.718719  | -2.908219 |
| H | 3.988784  | 4.824076  | -2.947583 |
| H | 4.779413  | 3.296764  | -2.390702 |
| H | 3.880189  | 3.328939  | -3.948619 |
| C | 1.566225  | 2.331717  | 3.794437  |
| H | 1.573769  | 3.337906  | 4.262975  |
| H | 0.619832  | 2.202245  | 3.228554  |
| H | 1.590655  | 1.569909  | 4.602435  |
| C | 4.087560  | 2.224302  | 3.626921  |
| H | 4.941052  | 2.088184  | 2.928455  |
| H | 4.193822  | 3.202752  | 4.140846  |
| H | 4.135525  | 1.418474  | 4.390505  |
| C | -3.060345 | 1.901064  | -2.094941 |
| C | -2.266659 | 1.839052  | -3.307658 |
| H | -1.586177 | 2.673661  | -3.509571 |
| B | -2.821216 | 2.920671  | -1.013028 |
| O | -1.756228 | 3.806353  | -0.968794 |
| O | -3.694598 | 3.162204  | 0.070159  |
| C | -1.806263 | 4.511509  | 0.284717  |
| C | -3.323435 | 4.447830  | 0.631965  |
| C | -0.957276 | 3.743175  | 1.282505  |
| H | 0.057640  | 3.654492  | 0.881715  |
| H | -0.891135 | 4.253741  | 2.253160  |
| H | -1.346010 | 2.727642  | 1.447212  |
| C | -1.257014 | 5.906602  | 0.083968  |
| H | -1.355600 | 6.506438  | 1.000039  |
| H | -0.189314 | 5.855838  | -0.167859 |
| H | -1.765991 | 6.432908  | -0.732541 |
| C | -4.131379 | 5.512424  | -0.091871 |
| H | -3.946900 | 6.513735  | 0.321013  |
| H | -3.893629 | 5.533213  | -1.164401 |
| H | -5.204152 | 5.301074  | 0.011733  |
| C | -3.635548 | 4.457476  | 2.112781  |
| H | -3.191304 | 3.602390  | 2.638964  |

|    |           |          |           |
|----|-----------|----------|-----------|
| H  | -3.253935 | 5.373694 | 2.585694  |
| H  | -4.722172 | 4.442488 | 2.283633  |
| Na | -4.978731 | 1.667202 | 1.264137  |
| H  | -2.749957 | 1.482600 | -4.224123 |
| H  | -4.002648 | 1.337325 | -2.096727 |
| H  | -1.054121 | 0.701116 | -3.516117 |

139

Figure\_S4\_imid-3\_modeS1\_ts(CuHadd)\_02 / electronic energy: -3372.910082259358 a.u. / lowest freq: -788.91 cm-1

|    |           |           |           |
|----|-----------|-----------|-----------|
| C  | -2.602455 | 2.142530  | -0.274179 |
| H  | -3.277499 | 2.022524  | -1.135555 |
| C  | -1.110293 | 2.170345  | -0.682407 |
| H  | -0.565685 | 3.018857  | -0.234733 |
| C  | -1.520795 | 0.244176  | 0.627004  |
| C  | -3.843717 | 0.458529  | 1.207583  |
| C  | -3.807467 | 0.383097  | 2.605865  |
| C  | -5.001397 | 0.050736  | 0.527250  |
| C  | -4.905341 | -0.077511 | 3.324807  |
| H  | -2.891990 | 0.690801  | 3.116646  |
| C  | -6.107257 | -0.391370 | 1.258733  |
| C  | -6.065712 | -0.453253 | 2.648508  |
| H  | -4.856593 | -0.131313 | 4.414350  |
| H  | -6.992686 | -0.718290 | 0.710626  |
| H  | -6.937889 | -0.805656 | 3.203268  |
| C  | 0.805050  | 0.676310  | 0.108031  |
| C  | 1.286053  | 0.190121  | 1.340696  |
| C  | 1.733153  | 0.945534  | -0.915573 |
| C  | 2.657976  | -0.006712 | 1.545263  |
| C  | 3.104503  | 0.750411  | -0.709029 |
| C  | 3.565226  | 0.275910  | 0.521166  |
| H  | 4.628062  | 0.139705  | 0.685658  |
| S  | -5.096687 | -0.034515 | -1.267374 |
| O  | -6.101664 | -1.105836 | -1.532511 |
| O  | -3.739734 | -0.481809 | -1.701861 |
| O  | -5.479680 | 1.304684  | -1.745669 |
| Cu | -1.551665 | -1.390350 | 1.629925  |
| C  | -3.015190 | 3.353540  | 0.525883  |
| C  | -4.021216 | 4.210796  | 0.047365  |
| C  | -2.408784 | 3.635125  | 1.765153  |
| C  | -4.412703 | 5.326140  | 0.794185  |
| H  | -4.502588 | 4.018820  | -0.903097 |
| C  | -2.804054 | 4.750907  | 2.507988  |
| H  | -1.632867 | 2.988399  | 2.156155  |
| C  | -3.805323 | 5.595723  | 2.023183  |
| H  | -5.188031 | 5.981935  | 0.419713  |
| H  | -2.334273 | 4.960034  | 3.460361  |
| H  | -4.110533 | 6.459352  | 2.599715  |
| C  | -0.948425 | 2.229935  | -2.181508 |
| C  | -0.554688 | 3.431833  | -2.796050 |
| C  | -1.164894 | 1.093666  | -2.982736 |
| C  | -0.373731 | 3.491949  | -4.180936 |
| H  | -0.383232 | 4.322039  | -2.203615 |
| C  | -0.981670 | 1.157641  | -4.366447 |
| H  | -1.448559 | 0.153131  | -2.536428 |
| C  | -0.586195 | 2.355812  | -4.965421 |
| H  | -0.065926 | 4.419687  | -4.645627 |
| H  | -1.140541 | 0.275708  | -4.973493 |
| H  | -0.442621 | 2.403497  | -6.037064 |
| N  | -2.676536 | 0.923704  | 0.546825  |
| N  | -0.587392 | 0.910020  | -0.089071 |
| H  | 1.410136  | 1.302950  | -1.879648 |
| H  | 0.602994  | -0.004586 | 2.157439  |
| C  | 4.069738  | 1.093866  | -1.772124 |
| C  | 4.617751  | 0.071931  | -2.597734 |
| C  | 4.462505  | 2.449498  | -1.959120 |
| C  | 5.551098  | 0.427574  | -3.588604 |
| C  | 5.391089  | 2.753789  | -2.971188 |
| C  | 5.928668  | 1.752953  | -3.772612 |
| H  | 5.991078  | -0.325124 | -4.229463 |
| H  | 5.708989  | 3.774016  | -3.141317 |
| H  | 6.645448  | 2.006780  | -4.543073 |
| C  | 3.155407  | -0.459423 | 2.858347  |
| C  | 3.325481  | 0.481327  | 3.913016  |
| C  | 3.487209  | -1.828312 | 3.061630  |
| C  | 3.811407  | 0.029244  | 5.153455  |
| C  | 3.984532  | -2.226540 | 4.316095  |
| C  | 4.138729  | -1.307997 | 5.348545  |
| H  | 3.947634  | 0.716824  | 5.977788  |
| H  | 4.253737  | -3.257879 | 4.502266  |
| H  | 4.517995  | -1.635137 | 6.308206  |
| C  | 3.316761  | -2.879547 | 1.964615  |
| H  | 2.884954  | -2.433574 | 1.046732  |
| C  | 2.339825  | -3.978504 | 2.398656  |
| H  | 1.377386  | -3.521613 | 2.708078  |
| H  | 2.141721  | -4.670396 | 1.553251  |
| H  | 2.744917  | -4.571336 | 3.245201  |
| C  | 4.669013  | -3.474033 | 1.555992  |
| H  | 5.364350  | -2.661359 | 1.256273  |
| H  | 5.125558  | -4.047415 | 2.390091  |

|    |           |           |           |
|----|-----------|-----------|-----------|
| H  | 4.537646  | -4.156384 | 0.689073  |
| C  | 3.011236  | 1.968138  | 3.737374  |
| H  | 2.659616  | 2.187163  | 2.709169  |
| C  | 4.265007  | 2.828193  | 3.939060  |
| H  | 4.038524  | 3.890555  | 3.705318  |
| H  | 4.632013  | 2.770129  | 4.985266  |
| H  | 5.071254  | 2.488375  | 3.253968  |
| C  | 1.880575  | 2.407484  | 4.675275  |
| H  | 1.602105  | 3.462731  | 4.467100  |
| H  | 0.983070  | 1.773788  | 4.508753  |
| H  | 2.185410  | 2.327850  | 5.739961  |
| C  | 3.916705  | 3.583998  | -1.090309 |
| H  | 3.205192  | 3.203693  | -0.330255 |
| C  | 4.221283  | -1.396605 | -2.448649 |
| H  | 3.463386  | -1.525796 | -1.651916 |
| C  | 3.579819  | -1.931574 | -3.735240 |
| H  | 2.727639  | -1.283575 | -4.032608 |
| H  | 4.311942  | -1.965937 | -4.569036 |
| H  | 3.193614  | -2.959411 | -3.567731 |
| C  | 5.422829  | -2.253430 | -2.034556 |
| H  | 6.192852  | -2.281239 | -2.834038 |
| H  | 5.880338  | -1.841921 | -1.109785 |
| H  | 5.093115  | -3.293791 | -1.826020 |
| C  | 3.134584  | 4.597136  | -1.934827 |
| H  | 3.801283  | 5.133282  | -2.642490 |
| H  | 2.342621  | 4.075749  | -2.513110 |
| H  | 2.646269  | 5.345993  | -1.275244 |
| C  | 5.039919  | 4.268715  | -0.302057 |
| H  | 5.592292  | 3.516011  | 0.300604  |
| H  | 5.753870  | 4.783452  | -0.978798 |
| H  | 4.611286  | 5.021212  | 0.394045  |
| C  | -2.502936 | -3.206068 | 1.307433  |
| C  | -1.903250 | -3.105315 | 2.619761  |
| H  | -0.996945 | -3.688477 | 2.809998  |
| B  | -1.700381 | -3.574727 | 0.088025  |
| O  | -0.336560 | -3.848081 | 0.097329  |
| O  | -2.212125 | -3.674841 | -1.219449 |
| C  | 0.119518  | -3.754043 | -1.265859 |
| C  | -1.149260 | -4.180003 | -2.066469 |
| C  | 0.483319  | -2.299545 | -1.506147 |
| H  | 1.252480  | -2.009805 | -0.778911 |
| H  | 0.877640  | -2.120460 | -2.514765 |
| H  | -0.388430 | -1.647885 | -1.351672 |
| C  | 1.321073  | -4.649666 | -1.468313 |
| H  | 1.584805  | -4.712364 | -2.533888 |
| H  | 2.193369  | -4.247083 | -0.936274 |
| H  | 1.140626  | -5.666183 | -1.098150 |
| C  | -1.303719 | -5.689023 | -2.148659 |
| H  | -0.566243 | -6.135533 | -2.829641 |
| H  | -1.186299 | -6.156091 | -1.161054 |
| H  | -2.303487 | -5.941616 | -2.527169 |
| C  | -1.267392 | -3.546942 | -3.436060 |
| H  | -1.319035 | -2.452121 | -3.377860 |
| H  | -0.407067 | -3.814901 | -4.066288 |
| H  | -2.170542 | -3.903816 | -3.952521 |
| Na | -4.220291 | -2.739823 | -1.881390 |
| H  | -2.565094 | -3.090074 | 3.492202  |
| H  | -3.582780 | -3.018750 | 1.237186  |
| H  | -1.160872 | -1.678271 | 3.145601  |

139

Figure\_S4\_imid-3\_modeS1\_prod(CuHadd) / electronic energy: -3372.945638609404 a.u. / lowest freq: 10.95 cm-1

|    |           |           |           |
|----|-----------|-----------|-----------|
| C  | -1.577608 | -3.104569 | 0.314876  |
| H  | -2.089302 | -2.980738 | 1.282672  |
| C  | -0.069863 | -2.791586 | 0.389955  |
| H  | 0.524497  | -3.481619 | -0.232322 |
| C  | -1.167777 | -1.035443 | -0.749425 |
| C  | -3.363526 | -1.952697 | -1.134399 |
| C  | -3.482274 | -1.971761 | -2.529759 |
| C  | -4.518928 | -1.838321 | -0.346954 |
| C  | -4.729806 | -1.900480 | -3.139781 |
| H  | -2.570026 | -2.046465 | -3.126295 |
| C  | -5.770179 | -1.783365 | -0.967795 |
| C  | -5.880411 | -1.824214 | -2.354383 |
| H  | -4.803081 | -1.912009 | -4.229118 |
| H  | -6.655933 | -1.674050 | -0.339511 |
| H  | -6.865938 | -1.777669 | -2.822498 |
| C  | 1.181733  | -0.668567 | -0.269414 |
| C  | 2.413687  | -1.299535 | -0.521415 |
| C  | 1.161434  | 0.713009  | -0.016780 |
| C  | 3.603477  | -0.562288 | -0.513399 |
| C  | 2.358193  | 1.444145  | 0.011702  |
| C  | 3.574616  | 0.806591  | -0.242607 |
| H  | 4.499232  | 1.372253  | -0.214639 |
| S  | -4.446928 | -1.569433 | 1.431649  |
| O  | -5.710847 | -0.831577 | 1.728869  |
| O  | -3.266243 | -0.669889 | 1.620109  |
| O  | -4.329152 | -2.881433 | 2.087546  |
| Cu | -2.021613 | 0.571211  | -1.428490 |

|   |           |           |           |
|---|-----------|-----------|-----------|
| C | -1.869400 | -4.475209 | -0.241542 |
| C | -2.517117 | -5.437904 | 0.552042  |
| C | -1.505052 | -4.808830 | -1.559862 |
| C | -2.797889 | -6.706450 | 0.035584  |
| H | -2.802354 | -5.210319 | 1.571147  |
| C | -1.788714 | -6.077992 | -2.071865 |
| H | -1.005590 | -4.084326 | -2.191088 |
| C | -2.434980 | -7.025997 | -1.275097 |
| H | -3.296884 | -7.442577 | 0.652475  |
| H | -1.507702 | -6.326340 | -3.087116 |
| H | -2.653756 | -8.008481 | -1.672915 |
| C | 0.457847  | -2.811233 | 1.802570  |
| C | 1.367599  | -3.804634 | 2.203802  |
| C | 0.069118  | -1.825276 | 2.729709  |
| C | 1.873928  | -3.813336 | 3.506815  |
| H | 1.685088  | -4.573249 | 1.510289  |
| C | 0.588319  | -1.830964 | 4.027019  |
| H | -0.624091 | -1.044897 | 2.443779  |
| C | 1.489878  | -2.824370 | 4.415551  |
| H | 2.572056  | -4.582965 | 3.809588  |
| H | 0.291530  | -1.064648 | 4.731230  |
| H | 1.890740  | -2.828224 | 5.420812  |
| N | -2.055799 | -2.036701 | -0.587336 |
| N | -0.013097 | -1.430578 | -0.191871 |
| H | 0.224899  | 1.207281  | 0.206118  |
| H | 2.456507  | -2.361337 | -0.723954 |
| C | 2.356962  | 2.871588  | 0.375157  |
| C | 2.413783  | 3.864867  | -0.641856 |
| C | 2.329438  | 3.250697  | 1.746695  |
| C | 2.435648  | 5.220396  | -0.264687 |
| C | 2.337222  | 4.619713  | 2.070967  |
| C | 2.391713  | 5.589950  | 1.075617  |
| H | 2.474450  | 6.001698  | -1.012177 |
| H | 2.306158  | 4.943400  | 3.102908  |
| H | 2.399201  | 6.638161  | 1.345444  |
| C | 4.895526  | -1.225912 | -0.764538 |
| C | 5.668224  | -1.708042 | 0.328585  |
| C | 5.397430  | -1.319441 | -2.092311 |
| C | 6.933425  | -2.266514 | 0.069730  |
| C | 6.663700  | -1.896376 | -2.299406 |
| C | 7.420101  | -2.362692 | -1.229567 |
| H | 7.555711  | -2.625787 | 0.878588  |
| H | 7.078297  | -1.977122 | -3.295602 |
| H | 8.395873  | -2.795951 | -1.408371 |
| C | 4.615932  | -0.790479 | -3.295596 |
| H | 3.628792  | -0.389487 | -2.988335 |
| C | 4.319519  | -1.908769 | -4.302523 |
| H | 3.794873  | -2.746373 | -3.794790 |
| H | 3.660175  | -1.526501 | -5.110949 |
| H | 5.251657  | -2.295023 | -4.765585 |
| C | 5.357078  | 0.374103  | -3.962970 |
| H | 5.556331  | 1.172868  | -3.216601 |
| H | 6.321912  | 0.040330  | -4.399669 |
| H | 4.733541  | 0.807416  | -4.774068 |
| C | 5.179354  | -1.611122 | 1.774752  |
| H | 4.143570  | -1.216984 | 1.823045  |
| C | 6.046937  | -0.636913 | 2.579254  |
| H | 5.628797  | -0.508648 | 3.600684  |
| H | 7.090234  | -1.007248 | 2.667035  |
| H | 6.058180  | 0.357425  | 2.083386  |
| C | 5.131337  | -2.989810 | 2.445163  |
| H | 4.678232  | -2.902679 | 3.455540  |
| H | 4.508286  | -3.683575 | 1.841195  |
| H | 6.146563  | -3.423448 | 2.559247  |
| C | 2.304080  | 2.218625  | 2.876520  |
| H | 2.338686  | 1.184064  | 2.479315  |
| C | 2.421911  | 3.506437  | -2.127910 |
| H | 2.389259  | 2.407988  | -2.276398 |
| C | 1.179900  | 4.061815  | -2.835548 |
| H | 0.262678  | 3.693984  | -2.329101 |
| H | 1.172809  | 5.171982  | -2.831028 |
| H | 1.155017  | 3.714086  | -3.890387 |
| C | 3.709649  | 3.987981  | -2.806341 |
| H | 3.772653  | 5.096478  | -2.812181 |
| H | 4.594233  | 3.579119  | -2.272500 |
| H | 3.743245  | 3.627756  | -3.856883 |
| C | 1.006694  | 2.317257  | 3.687319  |
| H | 0.915004  | 3.305556  | 4.184766  |
| H | 0.131864  | 2.165674  | 3.020438  |
| H | 0.984134  | 1.526448  | 4.467180  |
| C | 3.534823  | 2.355232  | 3.781305  |
| H | 4.461671  | 2.299546  | 3.171052  |
| H | 3.524848  | 3.317019  | 4.335735  |
| H | 3.557440  | 1.524982  | 4.519443  |
| C | -3.255239 | 1.954973  | -2.125134 |
| C | -2.841043 | 2.279738  | -3.553339 |
| H | -1.857340 | 2.773640  | -3.592592 |
| B | -3.122011 | 3.027047  | -1.072468 |

|    |           |          |           |
|----|-----------|----------|-----------|
| O  | -2.286002 | 4.135933 | -1.144736 |
| O  | -3.819667 | 3.047367 | 0.165821  |
| C  | -2.198262 | 4.711800 | 0.170056  |
| C  | -3.576405 | 4.335177 | 0.782693  |
| C  | -1.055204 | 4.019313 | 0.889948  |
| H  | -0.161326 | 4.104913 | 0.266308  |
| H  | -0.837333 | 4.465573 | 1.869938  |
| H  | -1.262768 | 2.948910 | 1.030081  |
| C  | -1.935216 | 6.195607 | 0.047115  |
| H  | -1.955943 | 6.684954 | 1.031804  |
| H  | -0.941103 | 6.365937 | -0.388878 |
| H  | -2.672601 | 6.686660 | -0.599743 |
| C  | -4.687527 | 5.275653 | 0.346747  |
| H  | -4.593980 | 6.262134 | 0.821640  |
| H  | -4.684510 | 5.417620 | -0.742704 |
| H  | -5.663421 | 4.858363 | 0.630350  |
| C  | -3.570678 | 4.174976 | 2.289278  |
| H  | -2.872489 | 3.394954 | 2.623122  |
| H  | -3.275856 | 5.113791 | 2.779662  |
| H  | -4.575112 | 3.925795 | 2.663383  |
| Na | -4.565031 | 1.298466 | 1.418545  |
| H  | -3.541577 | 2.964312 | -4.069705 |
| H  | -4.228845 | 1.431147 | -2.082194 |
| H  | -2.762184 | 1.388394 | -4.199685 |

139

Figure\_S4\_imid-3\_modeS2\_ed(CuHadd) / electronic energy: -3372.917139250770 a.u. / lowest freq: 13.57 cm<sup>-1</sup>

|    |           |           |           |
|----|-----------|-----------|-----------|
| C  | 2.659037  | -1.133880 | 1.494163  |
| H  | 3.060245  | -2.148254 | 1.348373  |
| C  | 1.134120  | -1.134541 | 1.754544  |
| H  | 0.852398  | -0.518466 | 2.623543  |
| C  | 1.567799  | -0.105588 | -0.332828 |
| C  | 3.955673  | -0.226555 | -0.518387 |
| C  | 4.307517  | 1.079266  | -0.877489 |
| C  | 4.749811  | -1.298704 | -0.953398 |
| C  | 5.464689  | 1.332758  | -1.604863 |
| H  | 3.644285  | 1.895605  | -0.584577 |
| C  | 5.923863  | -1.031937 | -1.664372 |
| C  | 6.293597  | 0.273559  | -1.974731 |
| H  | 5.718602  | 2.359658  | -1.877858 |
| H  | 6.522720  | -1.875433 | -2.013710 |
| H  | 7.213178  | 0.460263  | -2.533402 |
| C  | -0.769006 | -0.292658 | 0.261490  |
| C  | -1.659267 | -0.008151 | 1.310196  |
| C  | -1.280515 | -0.480683 | -1.034766 |
| C  | -3.036179 | 0.063719  | 1.071460  |
| C  | -2.660398 | -0.417897 | -1.271287 |
| C  | -3.536142 | -0.146149 | -0.216127 |
| H  | -4.605546 | -0.122000 | -0.391428 |
| S  | 4.224463  | -3.024415 | -0.845807 |
| O  | 4.777468  | -3.633033 | -2.084843 |
| O  | 2.729888  | -2.970728 | -0.905525 |
| O  | 4.752549  | -3.573216 | 0.415501  |
| Cu | 1.525291  | 0.645396  | -2.168510 |
| C  | 3.447655  | -0.424305 | 2.565739  |
| C  | 4.499516  | -1.081939 | 3.226939  |
| C  | 3.157779  | 0.910404  | 2.902619  |
| C  | 5.248608  | -0.413767 | 4.200585  |
| H  | 4.743825  | -2.109280 | 2.988160  |
| C  | 3.909933  | 1.575525  | 3.874100  |
| H  | 2.342440  | 1.429784  | 2.417827  |
| C  | 4.955686  | 0.914153  | 4.522312  |
| H  | 6.058336  | -0.925424 | 4.704534  |
| H  | 3.680449  | 2.603213  | 4.124815  |
| H  | 5.537722  | 1.429683  | 5.275186  |
| C  | 0.594005  | -2.527873 | 1.981963  |
| C  | 0.607051  | -3.059977 | 3.283009  |
| C  | 0.089767  | -3.317575 | 0.928799  |
| C  | 0.107988  | -4.342000 | 3.530128  |
| H  | 1.001033  | -2.478894 | 4.107788  |
| C  | -0.415925 | -4.595457 | 1.182760  |
| H  | 0.086118  | -2.954013 | -0.089346 |
| C  | -0.407401 | -5.107186 | 2.481756  |
| H  | 0.116102  | -4.740340 | 4.536361  |
| H  | -0.811199 | -5.191668 | 0.370892  |
| H  | -0.798755 | -6.097331 | 2.675879  |
| N  | 2.755318  | -0.407760 | 0.211947  |
| N  | 0.612433  | -0.492971 | 0.522259  |
| H  | -0.614472 | -0.737191 | -1.849404 |
| H  | -1.294105 | 0.139857  | 2.317522  |
| C  | -3.201189 | -0.730823 | -2.608868 |
| C  | -3.700347 | 0.311658  | -3.440830 |
| C  | -3.259806 | -2.084846 | -3.047940 |
| C  | -4.244022 | -0.022743 | -4.694547 |
| C  | -3.785503 | -2.361766 | -4.323131 |
| C  | -4.274137 | -1.342074 | -5.132160 |
| H  | -4.646523 | 0.742717  | -5.344727 |
| H  | -3.834744 | -3.377730 | -4.692201 |
| H  | -4.687754 | -1.577536 | -6.104428 |



|    |           |           |           |
|----|-----------|-----------|-----------|
| C  | -3.967581 | 0.294908  | 2.189133  |
| C  | -4.428965 | -0.806380 | 2.962991  |
| C  | -4.416953 | 1.612754  | 2.478785  |
| C  | -5.334894 | -0.564504 | 4.011830  |
| C  | -5.323691 | 1.801828  | 3.537731  |
| C  | -5.774779 | 0.724670  | 4.293330  |
| H  | -5.709883 | -1.379022 | 4.617432  |
| H  | -5.688620 | 2.790473  | 3.783203  |
| H  | -6.473224 | 0.890325  | 5.103595  |
| C  | -3.947172 | 2.826475  | 1.676046  |
| H  | -3.230368 | 2.530864  | 0.882938  |
| C  | -3.199753 | 3.824236  | 2.568627  |
| H  | -2.351241 | 3.316383  | 3.075182  |
| H  | -2.791417 | 4.652609  | 1.952214  |
| H  | -3.870094 | 4.260336  | 3.338632  |
| C  | -5.121635 | 3.500373  | 0.956929  |
| H  | -5.660214 | 2.756329  | 0.332287  |
| H  | -5.836013 | 3.945821  | 1.680867  |
| H  | -4.747027 | 4.306372  | 0.290175  |
| C  | -3.981240 | -2.242709 | 2.682851  |
| H  | -3.264839 | -2.285564 | 1.837398  |
| C  | -5.168513 | -3.120714 | 2.270481  |
| H  | -4.810155 | -4.130327 | 1.975526  |
| H  | -5.894943 | -3.234093 | 3.102497  |
| H  | -5.686860 | -2.669924 | 1.397021  |
| C  | -3.243967 | -2.838773 | 3.887767  |
| H  | -2.868892 | -3.853752 | 3.638445  |
| H  | -2.372755 | -2.201339 | 4.151232  |
| H  | -3.911227 | -2.921984 | 4.770950  |
| C  | -2.797992 | -3.250519 | -2.169327 |
| H  | -2.451496 | -2.897833 | -1.177813 |
| C  | -3.676068 | 1.779600  | -3.012889 |
| H  | -3.137431 | 1.905477  | -2.051968 |
| C  | -2.927773 | 2.651949  | -4.030117 |
| H  | -1.937759 | 2.206976  | -4.259605 |
| H  | -3.499456 | 2.754325  | -4.976232 |
| H  | -2.764362 | 3.667604  | -3.610225 |
| C  | -5.098461 | 2.303329  | -2.785718 |
| H  | -5.682454 | 2.299856  | -3.730399 |
| H  | -5.621994 | 1.668647  | -2.039471 |
| H  | -5.063572 | 3.342488  | -2.394135 |
| C  | -1.608662 | -3.981373 | -2.803147 |
| H  | -1.891859 | -4.451197 | -3.768400 |
| H  | -0.775981 | -3.267565 | -2.979439 |
| H  | -1.241536 | -4.776455 | -2.120159 |
| C  | -3.950849 | -4.218834 | -1.876352 |
| H  | -4.804938 | -3.666346 | -1.428936 |
| H  | -4.295112 | -4.730747 | -2.799320 |
| H  | -3.621337 | -4.991781 | -1.149140 |
| C  | 0.440483  | 2.390258  | -2.217434 |
| C  | 1.049403  | 2.129222  | -3.451326 |
| H  | 1.983628  | 2.633318  | -3.726676 |
| B  | 0.970403  | 3.350645  | -1.139987 |
| O  | 2.103715  | 4.121421  | -1.275796 |
| O  | 0.305469  | 3.591314  | 0.040030  |
| C  | 2.278267  | 4.878507  | -0.051212 |
| C  | 0.848005  | 4.814047  | 0.593111  |
| C  | 3.329779  | 4.167719  | 0.779982  |
| H  | 4.266766  | 4.094559  | 0.210914  |
| H  | 3.546262  | 4.701140  | 1.715334  |
| H  | 3.008719  | 3.149974  | 1.032835  |
| C  | 2.745315  | 6.274495  | -0.403384 |
| H  | 2.799580  | 6.906583  | 0.494607  |
| H  | 3.750383  | 6.236534  | -0.844427 |
| H  | 2.081240  | 6.760938  | -1.127347 |
| C  | -0.057220 | 5.942969  | 0.125663  |
| H  | 0.248956  | 6.912679  | 0.541153  |
| H  | -0.063770 | 6.025684  | -0.970046 |
| H  | -1.086896 | 5.744731  | 0.450085  |
| C  | 0.841531  | 4.718970  | 2.103142  |
| H  | 1.357105  | 3.819752  | 2.460681  |
| H  | 1.328237  | 5.596199  | 2.553036  |
| H  | -0.189958 | 4.684320  | 2.476447  |
| Na | 2.384574  | -2.733726 | -3.166685 |
| H  | 0.491258  | 1.709277  | -4.292819 |
| H  | -0.596609 | 2.053877  | -2.089521 |
| H  | 2.208435  | -0.369621 | -3.205592 |

139

Figure\_S4\_imid-3\_modeS2\_ts(CuHadd)\_01 / electronic energy: -3372.896126228521 a.u. / lowest freq: -736.24 cm-1

|   |          |           |           |
|---|----------|-----------|-----------|
| C | 2.439088 | -1.676187 | 1.378705  |
| H | 2.657417 | -2.705158 | 1.053479  |
| C | 0.943375 | -1.457967 | 1.701738  |
| H | 0.799796 | -0.779283 | 2.560465  |
| C | 1.466658 | -0.340104 | -0.308979 |
| C | 3.856795 | -0.513696 | -0.431264 |
| C | 4.213988 | 0.828414  | -0.607110 |
| C | 4.680625 | -1.518725 | -0.962378 |
| C | 5.402625 | 1.175608  | -1.239295 |

|    |           |           |           |
|----|-----------|-----------|-----------|
| H  | 3.532279  | 1.602717  | -0.248156 |
| C  | 5.888440  | -1.160601 | -1.569962 |
| C  | 6.261973  | 0.174813  | -1.692996 |
| H  | 5.653583  | 2.231523  | -1.368951 |
| H  | 6.509886  | -1.953040 | -1.991539 |
| H  | 7.207924  | 0.432359  | -2.174403 |
| C  | -0.871747 | -0.442648 | 0.230868  |
| C  | -1.638076 | 0.196557  | 1.216589  |
| C  | -1.469841 | -0.804004 | -0.984770 |
| C  | -2.992716 | 0.469822  | 0.986966  |
| C  | -2.829560 | -0.552880 | -1.203135 |
| C  | -3.588281 | 0.089003  | -0.219878 |
| H  | -4.642358 | 0.279091  | -0.387588 |
| S  | 4.145817  | -3.234684 | -1.124042 |
| O  | 4.839291  | -3.701324 | -2.355620 |
| O  | 2.670501  | -3.130265 | -1.361512 |
| O  | 4.505594  | -3.951071 | 0.110174  |
| Cu | 1.487606  | 0.792058  | -1.843877 |
| C  | 3.348839  | -1.296500 | 2.519225  |
| C  | 4.154140  | -2.267824 | 3.138822  |
| C  | 3.413433  | 0.034264  | 2.972312  |
| C  | 5.010930  | -1.912223 | 4.185135  |
| H  | 4.118306  | -3.300516 | 2.816730  |
| C  | 4.272463  | 0.385889  | 4.016689  |
| H  | 2.799890  | 0.797469  | 2.513870  |
| C  | 5.071455  | -0.586597 | 4.622489  |
| H  | 5.628578  | -2.665265 | 4.657214  |
| H  | 4.318417  | 1.412727  | 4.355883  |
| H  | 5.736240  | -0.313467 | 5.431710  |
| C  | 0.198466  | -2.744411 | 1.955625  |
| C  | -0.336345 | -3.012526 | 3.227911  |
| C  | 0.005222  | -3.680750 | 0.922751  |
| C  | -1.043590 | -4.195779 | 3.461833  |
| H  | -0.205768 | -2.308266 | 4.040016  |
| C  | -0.703552 | -4.860954 | 1.161273  |
| H  | 0.391713  | -3.491397 | -0.069228 |
| C  | -1.229344 | -5.117744 | 2.429181  |
| H  | -1.448801 | -4.397815 | 4.444781  |
| H  | -0.845656 | -5.576392 | 0.361978  |
| H  | -1.779437 | -6.031685 | 2.611891  |
| N  | 2.628031  | -0.776435 | 0.220329  |
| N  | 0.476192  | -0.785184 | 0.477198  |
| H  | -0.888900 | -1.321230 | -1.739302 |
| H  | -1.186218 | 0.482102  | 2.158241  |
| C  | -3.482839 | -1.026510 | -2.435997 |
| C  | -3.587274 | -0.165662 | -3.563247 |
| C  | -4.043605 | -2.333864 | -2.478345 |
| C  | -4.250643 | -0.632295 | -4.712962 |
| C  | -4.695448 | -2.753624 | -3.652256 |
| C  | -4.794689 | -1.911606 | -4.754707 |
| H  | -4.354810 | -0.001345 | -5.585784 |
| H  | -5.139037 | -3.738454 | -3.716538 |
| H  | -5.303017 | -2.251665 | -5.647887 |
| C  | -3.802703 | 1.141236  | 2.019361  |
| C  | -4.374722 | 0.381812  | 3.078025  |
| C  | -4.051755 | 2.539104  | 1.925532  |
| C  | -5.184229 | 1.039222  | 4.022668  |
| C  | -4.872148 | 3.148040  | 2.892613  |
| C  | -5.427605 | 2.405217  | 3.928693  |
| H  | -5.641267 | 0.491441  | 4.836179  |
| H  | -5.089785 | 4.206916  | 2.845743  |
| H  | -6.057022 | 2.891785  | 4.662792  |
| C  | -3.465343 | 3.396353  | 0.802704  |
| H  | -2.807583 | 2.797082  | 0.140749  |
| C  | -2.582007 | 4.518030  | 1.361136  |
| H  | -1.794339 | 4.087112  | 2.015237  |
| H  | -2.085924 | 5.059472  | 0.527617  |
| H  | -3.175688 | 5.250599  | 1.946774  |
| C  | -4.574100 | 3.960597  | -0.092872 |
| H  | -5.202756 | 3.132237  | -0.483931 |
| H  | -5.220768 | 4.669652  | 0.465819  |
| H  | -4.128586 | 4.495504  | -0.958816 |
| C  | -4.159332 | -1.127131 | 3.207055  |
| H  | -3.491038 | -1.509349 | 2.409014  |
| C  | -5.481083 | -1.887535 | 3.047755  |
| H  | -5.291843 | -2.982453 | 3.044789  |
| H  | -6.183375 | -1.653381 | 3.875323  |
| H  | -5.958806 | -1.617363 | 2.081556  |
| C  | -3.475611 | -1.478157 | 4.534010  |
| H  | -3.264022 | -2.567121 | 4.575322  |
| H  | -2.511482 | -0.932469 | 4.618654  |
| H  | -4.115684 | -1.216987 | 5.402428  |
| C  | -3.978939 | -3.286755 | -1.282476 |
| H  | -3.422811 | -2.835468 | -0.435792 |
| C  | -3.015789 | 1.252241  | -3.558729 |
| H  | -2.503757 | 1.474378  | -2.600509 |
| C  | -1.957390 | 1.427900  | -4.654695 |
| H  | -1.154472 | 0.670199  | -4.529309 |

|    |           |           |           |
|----|-----------|-----------|-----------|
| H  | -2.399469 | 1.320404  | -5.667193 |
| H  | -1.498649 | 2.436913  | -4.582204 |
| C  | -4.131297 | 2.294867  | -3.695964 |
| H  | -4.629280 | 2.224218  | -4.685917 |
| H  | -4.890862 | 2.143486  | -2.899461 |
| H  | -3.711751 | 3.317578  | -3.583987 |
| C  | -3.227055 | -4.575415 | -1.636333 |
| H  | -3.758883 | -5.153643 | -2.420507 |
| H  | -2.205297 | -4.330099 | -1.997587 |
| H  | -3.131976 | -5.217966 | -0.735354 |
| C  | -5.382532 | -3.594310 | -0.747785 |
| H  | -5.908259 | -2.647550 | -0.498782 |
| H  | -5.983954 | -4.155471 | -1.493652 |
| H  | -5.311617 | -4.203408 | 0.178860  |
| C  | 0.867979  | 2.711249  | -2.270975 |
| C  | 1.629752  | 2.123255  | -3.352141 |
| H  | 2.667682  | 2.459354  | -3.476783 |
| B  | 1.429176  | 3.582712  | -1.171500 |
| O  | 2.782114  | 3.850206  | -0.951184 |
| O  | 0.631260  | 4.277533  | -0.267800 |
| C  | 2.879186  | 4.612875  | 0.270971  |
| C  | 1.462328  | 5.266477  | 0.365393  |
| C  | 3.129009  | 3.641962  | 1.414721  |
| H  | 4.064861  | 3.091429  | 1.246808  |
| H  | 3.222609  | 4.158753  | 2.379813  |
| H  | 2.308555  | 2.913278  | 1.494462  |
| C  | 4.023094  | 5.596360  | 0.152402  |
| H  | 4.061750  | 6.260538  | 1.028190  |
| H  | 4.981871  | 5.061945  | 0.099022  |
| H  | 3.936248  | 6.217613  | -0.747382 |
| C  | 1.356361  | 6.543973  | -0.454658 |
| H  | 1.911237  | 7.374750  | 0.003435  |
| H  | 1.737330  | 6.397470  | -1.475314 |
| H  | 0.301659  | 6.841574  | -0.529353 |
| C  | 0.977746  | 5.507914  | 1.779012  |
| H  | 0.860938  | 4.570000  | 2.335896  |
| H  | 1.680929  | 6.150793  | 2.328567  |
| H  | 0.005190  | 6.017805  | 1.769610  |
| Na | 2.636377  | -2.677026 | -3.609013 |
| H  | 1.137835  | 1.988786  | -4.321142 |
| H  | -0.223937 | 2.683870  | -2.374204 |
| H  | 2.020231  | 0.564049  | -3.351297 |

139

Figure\_S4\_imid-3\_modeS2\_ts(CuHadd)\_02 / electronic energy: -3372.897805175084 a.u. / lowest freq: -779.49 cm<sup>-1</sup>

|    |           |           |           |
|----|-----------|-----------|-----------|
| C  | 2.401260  | -1.918754 | 1.049481  |
| H  | 2.908302  | -2.878444 | 0.875470  |
| C  | 0.860478  | -2.046981 | 1.134384  |
| H  | 0.449913  | -1.568364 | 2.040020  |
| C  | 1.417552  | -0.683434 | -0.712547 |
| C  | 3.821542  | -0.578584 | -0.625222 |
| C  | 3.951490  | 0.808534  | -0.770804 |
| C  | 4.887781  | -1.412452 | -1.004523 |
| C  | 5.125403  | 1.372842  | -1.258070 |
| H  | 3.113057  | 1.450863  | -0.489870 |
| C  | 6.072832  | -0.832489 | -1.466658 |
| C  | 6.201385  | 0.549277  | -1.586430 |
| H  | 5.188922  | 2.458034  | -1.370684 |
| H  | 6.882512  | -1.497885 | -1.772657 |
| H  | 7.134599  | 0.978065  | -1.958003 |
| C  | -0.894764 | -0.741190 | -0.090927 |
| C  | -1.110114 | 0.599827  | 0.267694  |
| C  | -1.990570 | -1.563970 | -0.377258 |
| C  | -2.415130 | 1.100340  | 0.390361  |
| C  | -3.293777 | -1.060215 | -0.283477 |
| C  | -3.504862 | 0.263998  | 0.117069  |
| H  | -4.515687 | 0.633770  | 0.238838  |
| S  | 4.753406  | -3.213980 | -1.092967 |
| O  | 5.811050  | -3.623800 | -2.036694 |
| O  | 3.372768  | -3.427402 | -1.637530 |
| O  | 4.912765  | -3.736795 | 0.278406  |
| Cu | 1.379247  | 0.558769  | -2.147556 |
| C  | 2.993366  | -1.245889 | 2.264223  |
| C  | 3.928568  | -1.918235 | 3.069507  |
| C  | 2.620149  | 0.068051  | 2.602778  |
| C  | 4.482875  | -1.284500 | 4.186237  |
| H  | 4.227285  | -2.932321 | 2.837696  |
| C  | 3.176604  | 0.698232  | 3.718277  |
| H  | 1.897346  | 0.600247  | 2.000023  |
| C  | 4.108524  | 0.022611  | 4.509449  |
| H  | 5.202998  | -1.807648 | 4.801977  |
| H  | 2.884374  | 1.709943  | 3.968897  |
| H  | 4.539210  | 0.510879  | 5.373985  |
| C  | 0.397724  | -3.481174 | 1.101635  |
| C  | -0.119469 | -4.081125 | 2.263598  |
| C  | 0.490400  | -4.243658 | -0.076853 |
| C  | -0.529650 | -5.417508 | 2.246422  |
| H  | -0.198979 | -3.518556 | 3.185501  |
| C  | 0.069688  | -5.576405 | -0.091895 |

|   |           |           |           |
|---|-----------|-----------|-----------|
| H | 0.872651  | -3.802142 | -0.986603 |
| C | -0.438460 | -6.163526 | 1.069105  |
| H | -0.925422 | -5.872730 | 3.145034  |
| H | 0.137626  | -6.154193 | -1.004476 |
| H | -0.762963 | -7.195906 | 1.056198  |
| N | 2.576955  | -1.067631 | -0.147847 |
| N | 0.407024  | -1.290674 | -0.053966 |
| H | -1.832721 | -2.599541 | -0.651600 |
| H | -0.267132 | 1.230125  | 0.522989  |
| C | -4.447992 | -1.936791 | -0.557825 |
| C | -5.047350 | -1.938846 | -1.848315 |
| C | -4.969749 | -2.766896 | 0.473426  |
| C | -6.153268 | -2.776683 | -2.081593 |
| C | -6.083158 | -3.579702 | 0.192149  |
| C | -6.663756 | -3.584389 | -1.071360 |
| H | -6.630132 | -2.805334 | -3.052499 |
| H | -6.508543 | -4.218115 | 0.955249  |
| H | -7.518052 | -4.219091 | -1.269198 |
| C | -2.647184 | 2.463242  | 0.920842  |
| C | -2.399684 | 2.736231  | 2.298942  |
| C | -3.163791 | 3.489845  | 0.075516  |
| C | -2.635988 | 4.033857  | 2.787734  |
| C | -3.422783 | 4.757823  | 0.627774  |
| C | -3.150753 | 5.026416  | 1.963265  |
| H | -2.440128 | 4.279327  | 3.823090  |
| H | -3.836601 | 5.552192  | 0.021284  |
| H | -3.343040 | 6.013330  | 2.364178  |
| C | -3.470844 | 3.257137  | -1.404517 |
| H | -3.090850 | 2.268851  | -1.734935 |
| C | -2.783199 | 4.295248  | -2.304934 |
| H | -1.710460 | 4.386004  | -2.045689 |
| H | -2.857593 | 3.980938  | -3.367939 |
| H | -3.254173 | 5.295731  | -2.207709 |
| C | -4.984588 | 3.259456  | -1.647363 |
| H | -5.476659 | 2.493718  | -1.012177 |
| H | -5.425023 | 4.251550  | -1.411610 |
| H | -5.200106 | 3.020732  | -2.710635 |
| C | -1.922794 | 1.659926  | 3.277934  |
| H | -1.848279 | 0.669952  | 2.787328  |
| C | -2.921766 | 1.465340  | 4.426200  |
| H | -2.614766 | 0.601159  | 5.053531  |
| H | -2.976188 | 2.364264  | 5.075193  |
| H | -3.932824 | 1.252794  | 4.016976  |
| C | -0.522901 | 1.983614  | 3.812198  |
| H | -0.157433 | 1.153541  | 4.453888  |
| H | 0.185255  | 2.100816  | 2.966123  |
| H | -0.525590 | 2.919077  | 4.410256  |
| C | -4.363599 | -2.799739 | 1.876762  |
| H | -3.478280 | -2.136051 | 1.948606  |
| C | -4.528429 | -1.061853 | -2.988057 |
| H | -3.668371 | -0.443778 | -2.659367 |
| C | -4.014987 | -1.917273 | -4.152324 |
| H | -3.236191 | -2.621835 | -3.789444 |
| H | -4.837170 | -2.499307 | -4.619412 |
| H | -3.559223 | -1.267069 | -4.929449 |
| C | -5.603608 | -0.075455 | -3.460141 |
| H | -6.448819 | -0.602723 | -3.950394 |
| H | -5.995012 | 0.500825  | -2.595302 |
| H | -5.167691 | 0.642045  | -4.187883 |
| C | -3.866161 | -4.206254 | 2.230355  |
| H | -4.709955 | -4.919643 | 2.337957  |
| H | -3.184256 | -4.575334 | 1.435091  |
| H | -3.304178 | -4.180872 | 3.188436  |
| C | -5.362017 | -2.286862 | 2.920889  |
| H | -5.701215 | -1.264180 | 2.649069  |
| H | -6.247613 | -2.952751 | 2.993620  |
| H | -4.876048 | -2.236194 | 3.918774  |
| C | 0.593388  | 2.428110  | -2.470053 |
| C | 1.372622  | 1.963968  | -3.598824 |
| H | 2.366606  | 2.407043  | -3.743157 |
| B | 1.107667  | 3.338119  | -1.375070 |
| O | 2.435166  | 3.741206  | -1.224600 |
| O | 0.294242  | 3.942059  | -0.423450 |
| C | 2.511300  | 4.544975  | -0.025752 |
| C | 1.038378  | 5.042120  | 0.126010  |
| C | 2.919413  | 3.640555  | 1.126045  |
| H | 3.885417  | 3.162785  | 0.913656  |
| H | 3.026089  | 4.198707  | 2.066465  |
| H | 2.171066  | 2.851380  | 1.283380  |
| C | 3.532131  | 5.642649  | -0.230871 |
| H | 3.540230  | 6.335298  | 0.623428  |
| H | 4.540793  | 5.215710  | -0.321071 |
| H | 3.330854  | 6.221001  | -1.140866 |
| C | 0.742630  | 6.262463  | -0.734570 |
| H | 1.217594  | 7.172266  | -0.341104 |
| H | 1.083264  | 6.115288  | -1.769372 |
| H | -0.342805 | 6.429771  | -0.760758 |
| C | 0.600295  | 5.291900  | 1.552208  |

|    |           |           |           |
|----|-----------|-----------|-----------|
| H  | 0.604652  | 4.374013  | 2.150216  |
| H  | 1.256926  | 6.026257  | 2.040822  |
| H  | -0.418208 | 5.699440  | 1.569017  |
| Na | 2.333343  | -2.430849 | -3.328527 |
| H  | 0.860331  | 1.813181  | -4.555303 |
| H  | -0.492291 | 2.292025  | -2.547587 |
| H  | 1.911444  | 0.464626  | -3.659957 |

139

Figure\_S4\_imid-3\_modeS2\_prod(CuHadd) / electronic energy: -3372.943100938274 a.u. / lowest freq: 11.70 cm<sup>-1</sup>

|    |           |           |           |
|----|-----------|-----------|-----------|
| C  | 2.702533  | -1.593922 | 1.219470  |
| H  | 3.218536  | -2.428134 | 0.724161  |
| C  | 1.173444  | -1.804520 | 1.324039  |
| H  | 0.818821  | -1.730454 | 2.364249  |
| C  | 1.601913  | 0.107008  | -0.005591 |
| C  | 4.002965  | 0.283001  | 0.043627  |
| C  | 4.099631  | 1.635888  | 0.401846  |
| C  | 5.083910  | -0.327445 | -0.615426 |
| C  | 5.251978  | 2.367295  | 0.135446  |
| H  | 3.250161  | 2.108603  | 0.902254  |
| C  | 6.242027  | 0.414567  | -0.867123 |
| C  | 6.334327  | 1.750975  | -0.489949 |
| H  | 5.299880  | 3.418925  | 0.426160  |
| H  | 7.063697  | -0.074590 | -1.392604 |
| H  | 7.247650  | 2.312634  | -0.697147 |
| C  | -0.735057 | -0.480710 | 0.260942  |
| C  | -1.705767 | -0.825711 | 1.218270  |
| C  | -1.155208 | -0.051334 | -1.011593 |
| C  | -3.068591 | -0.764292 | 0.901902  |
| C  | -2.518562 | -0.009900 | -1.332394 |
| C  | -3.472175 | -0.360720 | -0.372916 |
| H  | -4.526049 | -0.346796 | -0.626353 |
| S  | 5.031009  | -2.010511 | -1.248782 |
| O  | 6.068407  | -2.043593 | -2.324107 |
| O  | 3.671449  | -2.167620 | -1.848614 |
| O  | 5.309925  | -2.910673 | -0.116872 |
| Cu | 1.513033  | 1.754408  | -1.009423 |
| C  | 3.343999  | -1.333866 | 2.562037  |
| C  | 4.320245  | -2.210832 | 3.066528  |
| C  | 2.977207  | -0.208757 | 3.325134  |
| C  | 4.923682  | -1.960667 | 4.302797  |
| H  | 4.612908  | -3.090403 | 2.508161  |
| C  | 3.584008  | 0.037791  | 4.559384  |
| H  | 2.222679  | 0.476896  | 2.962491  |
| C  | 4.557635  | -0.836690 | 5.047465  |
| H  | 5.675382  | -2.639590 | 4.684178  |
| H  | 3.298633  | 0.907110  | 5.137584  |
| H  | 5.026650  | -0.644900 | 6.003825  |
| C  | 0.732408  | -3.131217 | 0.753493  |
| C  | 0.302320  | -4.157705 | 1.612361  |
| C  | 0.741280  | -3.361700 | -0.635299 |
| C  | -0.104804 | -5.389765 | 1.092707  |
| H  | 0.286505  | -4.007898 | 2.684689  |
| C  | 0.323361  | -4.591944 | -1.150142 |
| H  | 1.057892  | -2.586098 | -1.319850 |
| C  | -0.099385 | -5.605094 | -0.287178 |
| H  | -0.432741 | -6.175788 | 1.760557  |
| H  | 0.329255  | -4.761482 | -2.218515 |
| H  | -0.422438 | -6.557263 | -0.687495 |
| N  | 2.795970  | -0.394638 | 0.355616  |
| N  | 0.646353  | -0.662326 | 0.540476  |
| H  | -0.425218 | 0.183418  | -1.776517 |
| H  | -1.409519 | -1.157028 | 2.204774  |
| C  | -2.954631 | 0.306242  | -2.706375 |
| C  | -3.518590 | 1.579442  | -3.000046 |
| C  | -2.880339 | -0.692935 | -3.718677 |
| C  | -4.017825 | 1.818181  | -4.293681 |
| C  | -3.362081 | -0.391198 | -5.005618 |
| C  | -3.929971 | 0.846783  | -5.284446 |
| H  | -4.478333 | 2.764596  | -4.543754 |
| H  | -3.316786 | -1.125265 | -5.799290 |
| H  | -4.310636 | 1.053437  | -6.276523 |
| C  | -4.083361 | -1.172449 | 1.891876  |
| C  | -4.576753 | -2.507279 | 1.890852  |
| C  | -4.602068 | -0.219744 | 2.812403  |
| C  | -5.586018 | -2.857633 | 2.806566  |
| C  | -5.595421 | -0.625469 | 3.722017  |
| C  | -6.081838 | -1.928137 | 3.714391  |
| H  | -5.997335 | -3.858218 | 2.820786  |
| H  | -6.008158 | 0.073137  | 4.437917  |
| H  | -6.854288 | -2.218618 | 4.414931  |
| C  | -4.124651 | 1.231520  | 2.833778  |
| H  | -3.358697 | 1.406568  | 2.054515  |
| C  | -3.460125 | 1.575522  | 4.172041  |
| H  | -2.624083 | 0.871210  | 4.371024  |
| H  | -3.044249 | 2.604736  | 4.138106  |
| H  | -4.186602 | 1.519124  | 5.009702  |
| C  | -5.271152 | 2.199618  | 2.517971  |
| H  | -5.740400 | 1.927181  | 1.548391  |

|    |           |           |           |
|----|-----------|-----------|-----------|
| H  | -6.046672 | 2.180490  | 3.312178  |
| H  | -4.880689 | 3.236343  | 2.433393  |
| C  | -4.060128 | -3.564664 | 0.913698  |
| H  | -3.220428 | -3.172554 | 0.303990  |
| C  | -5.155888 | -3.973534 | -0.076705 |
| H  | -4.743784 | -4.677285 | -0.831370 |
| H  | -6.003068 | -4.468221 | 0.443757  |
| H  | -5.535958 | -3.076789 | -0.611575 |
| C  | -3.501918 | -4.786948 | 1.653209  |
| H  | -3.038251 | -5.488176 | 0.927281  |
| H  | -2.723220 | -4.468157 | 2.378584  |
| H  | -4.299550 | -5.333315 | 2.198210  |
| C  | -2.319776 | -2.091264 | -3.448246 |
| H  | -2.004103 | -2.204714 | -2.392133 |
| C  | -3.609443 | 2.688760  | -1.952154 |
| H  | -3.073609 | 2.402563  | -1.023891 |
| C  | -2.938883 | 3.980032  | -2.439234 |
| H  | -1.899290 | 3.769406  | -2.767515 |
| H  | -3.496241 | 4.437313  | -3.282922 |
| H  | -2.902649 | 4.719931  | -1.613228 |
| C  | -5.067093 | 2.945171  | -1.555208 |
| H  | -5.655517 | 3.323694  | -2.417804 |
| H  | -5.531963 | 2.005334  | -1.188489 |
| H  | -5.112326 | 3.695120  | -0.736527 |
| C  | -1.070054 | -2.356288 | -4.295884 |
| H  | -1.309241 | -2.354785 | -5.380010 |
| H  | -0.304344 | -1.576914 | -4.093901 |
| H  | -0.635240 | -3.344115 | -4.035597 |
| C  | -3.384456 | -3.171056 | -3.677476 |
| H  | -4.286560 | -2.948465 | -3.068241 |
| H  | -3.677110 | -3.230769 | -4.746736 |
| H  | -2.992673 | -4.162748 | -3.364636 |
| C  | 1.531944  | 3.501583  | -1.950171 |
| C  | 2.922457  | 3.920381  | -2.385175 |
| H  | 3.596286  | 4.040211  | -1.521683 |
| B  | 0.936142  | 4.038147  | -0.665832 |
| O  | 1.668462  | 4.513643  | 0.437379  |
| O  | -0.431387 | 4.028587  | -0.362389 |
| C  | 0.786366  | 4.499743  | 1.572417  |
| C  | -0.617542 | 4.671530  | 0.902452  |
| C  | 0.933445  | 3.144628  | 2.252853  |
| H  | 1.978317  | 3.003522  | 2.565236  |
| H  | 0.303261  | 3.052227  | 3.148900  |
| H  | 0.672512  | 2.329746  | 1.557782  |
| C  | 1.176884  | 5.610554  | 2.523916  |
| H  | 0.465944  | 5.684730  | 3.360230  |
| H  | 2.171432  | 5.415447  | 2.948924  |
| H  | 1.215947  | 6.583480  | 2.018491  |
| C  | -0.955824 | 6.132847  | 0.644809  |
| H  | -1.172128 | 6.677131  | 1.575133  |
| H  | -0.132428 | 6.647154  | 0.129463  |
| H  | -1.844608 | 6.199317  | 0.003861  |
| C  | -1.751456 | 3.983255  | 1.632060  |
| H  | -1.573135 | 2.903884  | 1.702393  |
| H  | -1.879246 | 4.382625  | 2.648867  |
| H  | -2.696849 | 4.130031  | 1.091850  |
| Na | 4.500036  | -2.206091 | -4.097946 |
| H  | 2.940439  | 4.891668  | -2.912713 |
| H  | 0.807585  | 3.450826  | -2.779996 |
| H  | 3.420954  | 3.200812  | -3.059211 |

139

Figure\_S4\_imid-3\_modeR1\_ed(CuHadd) / electronic energy: -3372.918154055547 a.u. / lowest freq: 13.02 cm<sup>-1</sup>

|   |           |           |           |
|---|-----------|-----------|-----------|
| C | -2.842116 | -1.600754 | 1.226396  |
| H | -3.412973 | -0.862402 | 1.812809  |
| C | -1.338878 | -1.588601 | 1.552203  |
| H | -0.880990 | -2.588237 | 1.451714  |
| C | -1.675630 | -0.554906 | -0.540209 |
| C | -4.047714 | -0.989363 | -0.931013 |
| C | -4.495452 | -2.080989 | -1.676886 |
| C | -4.796390 | 0.198405  | -0.945848 |
| C | -5.673509 | -2.008536 | -2.414181 |
| H | -3.889214 | -2.987443 | -1.706471 |
| C | -5.973072 | 0.270456  | -1.690700 |
| C | -6.417680 | -0.831076 | -2.418525 |
| H | -6.000657 | -2.871623 | -2.997504 |
| H | -6.532251 | 1.207714  | -1.690791 |
| H | -7.342269 | -0.764617 | -2.995862 |
| C | 0.580627  | -0.728240 | 0.206720  |
| C | 1.118377  | -1.744423 | -0.594312 |
| C | 1.432633  | 0.226500  | 0.777810  |
| C | 2.497205  | -1.816227 | -0.813145 |
| C | 2.815609  | 0.182846  | 0.527689  |
| C | 3.345602  | -0.858631 | -0.247105 |
| H | 4.414147  | -0.921218 | -0.413792 |
| S | -4.243013 | 1.662788  | -0.068867 |
| O | -5.175592 | 2.751336  | -0.473421 |
| O | -2.874082 | 1.949300  | -0.621577 |
| O | -4.247240 | 1.325053  | 1.363904  |

|    |           |           |           |
|----|-----------|-----------|-----------|
| Cu | -1.504687 | 0.530577  | -2.226251 |
| C  | -3.472731 | -2.964645 | 1.364372  |
| C  | -4.566933 | -3.149211 | 2.227898  |
| C  | -2.983808 | -4.067143 | 0.637117  |
| C  | -5.159872 | -4.408594 | 2.358921  |
| H  | -4.963305 | -2.319667 | 2.800078  |
| C  | -3.580354 | -5.323831 | 0.771316  |
| H  | -2.149073 | -3.951251 | -0.043116 |
| C  | -4.667323 | -5.494675 | 1.631521  |
| H  | -6.002463 | -4.542352 | 3.024943  |
| H  | -3.201066 | -6.165102 | 0.205808  |
| H  | -5.128626 | -6.468399 | 1.733739  |
| C  | -1.051013 | -1.057467 | 2.932176  |
| C  | -0.473374 | -1.892225 | 3.905318  |
| C  | -1.400503 | 0.258070  | 3.282936  |
| C  | -0.274361 | -1.425313 | 5.207923  |
| H  | -0.194502 | -2.910346 | 3.663582  |
| C  | -1.194149 | 0.723630  | 4.583914  |
| H  | -1.849395 | 0.914834  | 2.552732  |
| C  | -0.639768 | -0.120360 | 5.548550  |
| H  | 0.163322  | -2.075688 | 5.954064  |
| H  | -1.469885 | 1.737039  | 4.845199  |
| H  | -0.482703 | 0.239911  | 6.556877  |
| N  | -2.842568 | -1.114372 | -0.175057 |
| N  | -0.805799 | -0.711487 | 0.483012  |
| H  | 1.022718  | 0.993482  | 1.420785  |
| H  | 0.464549  | -2.495295 | -1.022674 |
| C  | 3.717598  | 1.218338  | 1.086811  |
| C  | 4.345703  | 2.167354  | 0.223241  |
| C  | 3.995721  | 1.244272  | 2.484717  |
| C  | 5.213060  | 3.124855  | 0.780323  |
| C  | 4.855673  | 2.237354  | 2.989954  |
| C  | 5.452049  | 3.165462  | 2.147158  |
| H  | 5.715395  | 3.849046  | 0.152973  |
| H  | 5.087113  | 2.285604  | 4.045717  |
| H  | 6.119569  | 3.913466  | 2.555532  |
| C  | 3.052274  | -2.921018 | -1.616086 |
| C  | 3.336492  | -4.170462 | -0.997491 |
| C  | 3.251430  | -2.753525 | -3.014716 |
| C  | 3.806932  | -5.230200 | -1.794231 |
| C  | 3.720545  | -3.845248 | -3.768148 |
| C  | 3.995273  | -5.066592 | -3.162372 |
| H  | 4.025365  | -6.195725 | -1.357351 |
| H  | 3.871512  | -3.756206 | -4.835877 |
| H  | 4.354395  | -5.895085 | -3.759399 |
| C  | 2.954123  | -1.433336 | -3.726208 |
| H  | 2.644565  | -0.650535 | -3.004999 |
| C  | 1.790008  | -1.591204 | -4.710612 |
| H  | 0.888521  | -1.957492 | -4.174057 |
| H  | 1.544940  | -0.610226 | -5.170505 |
| H  | 2.042557  | -2.306689 | -5.521400 |
| C  | 4.201816  | -0.886109 | -4.430583 |
| H  | 5.047761  | -0.827772 | -3.713223 |
| H  | 4.500172  | -1.529080 | -5.284947 |
| H  | 4.000844  | 0.135988  | -4.817028 |
| C  | 3.134947  | -4.400127 | 0.501238  |
| H  | 2.794087  | -3.474364 | 1.007695  |
| C  | 4.450300  | -4.789534 | 1.187233  |
| H  | 4.303283  | -4.842693 | 2.287269  |
| H  | 4.814265  | -5.777504 | 0.835184  |
| H  | 5.227416  | -4.023145 | 0.978908  |
| C  | 2.045830  | -5.449090 | 0.754627  |
| H  | 1.850216  | -5.538970 | 1.844607  |
| H  | 1.100526  | -5.140610 | 0.258311  |
| H  | 2.347785  | -6.445010 | 0.367363  |
| C  | 3.436813  | 0.201892  | 3.453079  |
| H  | 2.789874  | -0.531174 | 2.932088  |
| C  | 4.134325  | 2.171840  | -1.292011 |
| H  | 3.347636  | 1.450270  | -1.584441 |
| C  | 3.654778  | 3.538806  | -1.798942 |
| H  | 2.805407  | 3.895531  | -1.186887 |
| H  | 4.464199  | 4.297283  | -1.756922 |
| H  | 3.312388  | 3.453485  | -2.852533 |
| C  | 5.416467  | 1.749711  | -2.018908 |
| H  | 6.241951  | 2.466656  | -1.823945 |
| H  | 5.733893  | 0.741080  | -1.680590 |
| H  | 5.237845  | 1.710179  | -3.114215 |
| C  | 2.564999  | 0.860567  | 4.527909  |
| H  | 3.147339  | 1.576200  | 5.144491  |
| H  | 1.719742  | 1.401059  | 4.050642  |
| H  | 2.153111  | 0.084733  | 5.204949  |
| C  | 4.564906  | -0.621415 | 4.087821  |
| H  | 5.192870  | -1.079237 | 3.293527  |
| H  | 5.208230  | 0.007011  | 4.738936  |
| H  | 4.136757  | -1.440712 | 4.704341  |
| C  | 0.111068  | 1.827332  | -2.215977 |
| C  | -0.537009 | 1.763391  | -3.464750 |
| H  | -0.135729 | 1.159918  | -4.284973 |

|    |           |           |           |
|----|-----------|-----------|-----------|
| B  | -0.104649 | 2.953198  | -1.200760 |
| O  | 0.623258  | 3.082282  | -0.046470 |
| O  | -0.988409 | 4.019951  | -1.369662 |
| C  | 0.072610  | 4.161274  | 0.732287  |
| C  | -0.679161 | 5.009836  | -0.350722 |
| C  | -0.864180 | 3.542055  | 1.755209  |
| H  | -0.288253 | 2.862318  | 2.396540  |
| H  | -1.321822 | 4.299851  | 2.406034  |
| H  | -1.660479 | 2.962725  | 1.267344  |
| C  | 1.207854  | 4.883188  | 1.427666  |
| H  | 0.834606  | 5.741020  | 2.005376  |
| H  | 1.703819  | 4.198387  | 2.128956  |
| H  | 1.967699  | 5.245499  | 0.725294  |
| C  | 0.198435  | 6.061837  | -1.006954 |
| H  | 0.448052  | 6.873754  | -0.310504 |
| H  | 1.135919  | 5.630966  | -1.381264 |
| H  | -0.330206 | 6.503717  | -1.862382 |
| C  | -1.973352 | 5.628188  | 0.134467  |
| H  | -2.684587 | 4.869151  | 0.486221  |
| H  | -1.789112 | 6.321326  | 0.967318  |
| H  | -2.446492 | 6.213597  | -0.667916 |
| Na | -3.301253 | 3.694794  | -2.015835 |
| H  | -1.181509 | 2.584155  | -3.802489 |
| H  | 0.974727  | 1.168627  | -2.063994 |
| H  | -2.529753 | -0.018440 | -3.317941 |

139

Figure\_S4\_imid-3\_modeR1\_ts(CuHadd)\_01 / electronic energy: -3372.900960619068 a.u. / lowest freq: -843.80 cm<sup>-1</sup>

|    |           |           |           |
|----|-----------|-----------|-----------|
| C  | -2.393461 | -2.396715 | 0.918817  |
| H  | -2.969236 | -1.825301 | 1.664766  |
| C  | -0.871097 | -2.249494 | 1.101119  |
| H  | -0.323551 | -3.166166 | 0.820906  |
| C  | -1.557638 | -0.930440 | -0.738412 |
| C  | -3.850880 | -1.705405 | -1.074997 |
| C  | -4.082541 | -2.677989 | -2.051423 |
| C  | -4.855546 | -0.760754 | -0.808827 |
| C  | -5.294879 | -2.734289 | -2.733749 |
| H  | -3.286588 | -3.385614 | -2.289470 |
| C  | -6.069323 | -0.818931 | -1.493349 |
| C  | -6.295278 | -1.808761 | -2.447719 |
| H  | -5.451945 | -3.501139 | -3.494973 |
| H  | -6.829877 | -0.068735 | -1.269264 |
| H  | -7.250857 | -1.847601 | -2.975061 |
| C  | 0.763171  | -0.776687 | -0.122004 |
| C  | 1.692604  | -1.703594 | -0.611084 |
| C  | 1.190308  | 0.509287  | 0.230958  |
| C  | 3.041900  | -1.353163 | -0.729778 |
| C  | 2.541378  | 0.870367  | 0.100534  |
| C  | 3.465157  | -0.068816 | -0.373594 |
| H  | 4.515477  | 0.189386  | -0.439605 |
| S  | -4.566551 | 0.596946  | 0.323799  |
| O  | -5.751006 | 1.492995  | 0.195544  |
| O  | -3.357647 | 1.286586  | -0.242794 |
| O  | -4.358364 | 0.018404  | 1.660621  |
| Cu | -1.792506 | 0.554861  | -1.965650 |
| C  | -2.861263 | -3.830818 | 0.902085  |
| C  | -3.829883 | -4.264921 | 1.824473  |
| C  | -2.346204 | -4.751491 | -0.030308 |
| C  | -4.273814 | -5.590618 | 1.812763  |
| H  | -4.243430 | -3.578939 | 2.553230  |
| C  | -2.793964 | -6.075445 | -0.038619 |
| H  | -1.603985 | -4.442614 | -0.755683 |
| C  | -3.756704 | -6.494917 | 0.882191  |
| H  | -5.019852 | -5.916868 | 2.525823  |
| H  | -2.395033 | -6.776233 | -0.760497 |
| H  | -4.102347 | -7.520521 | 0.874459  |
| C  | -0.476672 | -1.848419 | 2.498947  |
| C  | 0.352121  | -2.684481 | 3.267465  |
| C  | -0.902996 | -0.621619 | 3.041707  |
| C  | 0.735650  | -2.306151 | 4.557116  |
| H  | 0.700972  | -3.629523 | 2.870992  |
| C  | -0.521853 | -0.250558 | 4.333367  |
| H  | -1.526151 | 0.047782  | 2.462393  |
| C  | 0.294064  | -1.093703 | 5.091886  |
| H  | 1.374651  | -2.954378 | 5.142670  |
| H  | -0.853010 | 0.694682  | 4.743597  |
| H  | 0.591429  | -0.803126 | 6.091101  |
| N  | -2.601316 | -1.714024 | -0.384939 |
| N  | -0.566292 | -1.179336 | 0.135312  |
| H  | 0.482471  | 1.199691  | 0.659292  |
| H  | 1.373078  | -2.706719 | -0.866687 |
| C  | 3.017043  | 2.208139  | 0.520415  |
| C  | 3.355418  | 3.185916  | -0.461986 |
| C  | 3.269557  | 2.470826  | 1.899074  |
| C  | 3.914482  | 4.406531  | -0.042891 |
| C  | 3.845021  | 3.703749  | 2.260321  |
| C  | 4.146586  | 4.662554  | 1.301834  |
| H  | 4.198653  | 5.162221  | -0.762780 |
| H  | 4.088954  | 3.923977  | 3.290131  |



|    |           |           |           |
|----|-----------|-----------|-----------|
| H  | 4.590647  | 5.603073  | 1.601909  |
| C  | 4.028000  | -2.362027 | -1.155091 |
| C  | 4.605895  | -3.233497 | -0.189905 |
| C  | 4.385316  | -2.474930 | -2.527010 |
| C  | 5.519084  | -4.212494 | -0.621949 |
| C  | 5.303605  | -3.470328 | -2.908258 |
| C  | 5.860687  | -4.327845 | -1.965344 |
| H  | 5.973215  | -4.894883 | 0.084421  |
| H  | 5.592402  | -3.588344 | -3.944376 |
| H  | 6.564928  | -5.087969 | -2.278485 |
| C  | 3.798989  | -1.554760 | -3.597948 |
| H  | 3.111387  | -0.807523 | -3.151840 |
| C  | 2.965422  | -2.349500 | -4.610003 |
| H  | 2.172443  | -2.920850 | -4.081343 |
| H  | 2.474118  | -1.656209 | -5.325804 |
| H  | 3.597387  | -3.058764 | -5.184946 |
| C  | 4.899130  | -0.749136 | -4.300082 |
| H  | 5.511306  | -0.207286 | -3.548176 |
| H  | 5.564413  | -1.407664 | -4.897066 |
| H  | 4.443991  | 0.000439  | -4.982291 |
| C  | 4.267661  | -3.137225 | 1.299497  |
| H  | 3.556665  | -2.309950 | 1.499414  |
| C  | 5.516221  | -2.824021 | 2.133025  |
| H  | 5.230224  | -2.641295 | 3.191084  |
| H  | 6.242053  | -3.663682 | 2.105704  |
| H  | 6.010560  | -1.907626 | 1.745312  |
| C  | 3.579060  | -4.414842 | 1.792997  |
| H  | 3.270567  | -4.294876 | 2.853637  |
| H  | 2.668199  | -4.611137 | 1.187420  |
| H  | 4.256098  | -5.291869 | 1.721138  |
| C  | 3.040947  | 1.416463  | 2.984407  |
| H  | 2.424397  | 0.578865  | 2.601664  |
| C  | 3.193843  | 2.929875  | -1.960689 |
| H  | 2.617215  | 2.000144  | -2.138440 |
| C  | 2.416617  | 4.057598  | -2.657968 |
| H  | 1.499701  | 4.309075  | -2.088844 |
| H  | 3.031664  | 4.976593  | -2.755506 |
| H  | 2.116673  | 3.734296  | -3.677670 |
| C  | 4.561877  | 2.732089  | -2.623445 |
| H  | 5.175288  | 3.655683  | -2.555383 |
| H  | 5.111014  | 1.904355  | -2.128055 |
| H  | 4.431733  | 2.469511  | -3.695077 |
| C  | 2.274846  | 1.978449  | 4.191384  |
| H  | 2.880302  | 2.715162  | 4.757945  |
| H  | 1.334858  | 2.463719  | 3.859536  |
| H  | 2.016374  | 1.156107  | 4.889353  |
| C  | 4.376604  | 0.808396  | 3.423713  |
| H  | 4.901957  | 0.375057  | 2.545765  |
| H  | 5.029276  | 1.577570  | 3.889041  |
| H  | 4.202665  | -0.006444 | 4.158844  |
| C  | -0.771041 | 2.347718  | -2.224579 |
| C  | -1.707498 | 2.074929  | -3.294490 |
| H  | -1.310416 | 1.870251  | -4.295074 |
| B  | -1.039030 | 3.238934  | -1.043755 |
| O  | -0.114813 | 3.532068  | -0.049997 |
| O  | -2.232395 | 3.965819  | -0.815911 |
| C  | -0.798632 | 4.209508  | 1.010483  |
| C  | -1.959115 | 4.915184  | 0.242941  |
| C  | -1.314066 | 3.162173  | 1.988586  |
| H  | -0.472837 | 2.559790  | 2.351697  |
| H  | -1.796967 | 3.618943  | 2.864279  |
| H  | -2.028920 | 2.479120  | 1.507372  |
| C  | 0.172398  | 5.147234  | 1.696065  |
| H  | -0.336930 | 5.775525  | 2.441240  |
| H  | 0.942433  | 4.567697  | 2.222446  |
| H  | 0.684116  | 5.801259  | 0.979457  |
| C  | -1.517127 | 6.214043  | -0.411575 |
| H  | -1.337666 | 7.005702  | 0.329255  |
| H  | -0.594618 | 6.068712  | -0.990909 |
| H  | -2.295837 | 6.568896  | -1.100647 |
| C  | -3.217030 | 5.124572  | 1.059372  |
| H  | -3.625966 | 4.177880  | 1.438822  |
| H  | -3.020693 | 5.769723  | 1.927640  |
| H  | -3.992754 | 5.624834  | 0.459892  |
| Na | -4.406813 | 3.196905  | -1.084985 |
| H  | -2.596601 | 2.716117  | -3.362088 |
| H  | 0.251610  | 1.984509  | -2.370656 |
| H  | -2.569818 | 0.676423  | -3.365360 |

139

Figure\_S4\_imid-3\_modeR1\_ts(CuHadd)\_02 / electronic energy: -3372.900953941339 a.u. / lowest freq: -824.32 cm<sup>-1</sup>

|   |           |           |           |
|---|-----------|-----------|-----------|
| C | -2.352671 | -2.451423 | 0.904926  |
| H | -2.934195 | -1.902815 | 1.663326  |
| C | -0.831638 | -2.282134 | 1.083950  |
| H | -0.270637 | -3.190354 | 0.803103  |
| C | -1.544676 | -0.956079 | -0.742577 |
| C | -3.840508 | -1.747041 | -1.055506 |
| C | -4.085839 | -2.720394 | -2.027995 |
| C | -4.849136 | -0.813517 | -0.763903 |

|    |           |           |           |
|----|-----------|-----------|-----------|
| C  | -5.314691 | -2.790473 | -2.678881 |
| H  | -3.288388 | -3.418689 | -2.287553 |
| C  | -6.079741 | -0.886123 | -1.416189 |
| C  | -6.319296 | -1.879080 | -2.364048 |
| H  | -5.481774 | -3.558134 | -3.437151 |
| H  | -6.842900 | -0.144845 | -1.171985 |
| H  | -7.288652 | -1.930639 | -2.864468 |
| C  | 0.778212  | -0.776948 | -0.133487 |
| C  | 1.176963  | 0.518739  | 0.218589  |
| C  | 1.729735  | -1.686032 | -0.613619 |
| C  | 2.521417  | 0.906658  | 0.096078  |
| C  | 3.072173  | -1.308022 | -0.725832 |
| C  | 3.466818  | -0.014417 | -0.370628 |
| H  | 4.512052  | 0.265027  | -0.430964 |
| S  | -4.534811 | 0.561617  | 0.340538  |
| O  | -5.742151 | 1.432175  | 0.267550  |
| O  | -3.375308 | 1.268532  | -0.302909 |
| O  | -4.238441 | 0.006697  | 1.670259  |
| Cu | -1.799935 | 0.526767  | -1.967703 |
| C  | -2.795444 | -3.893217 | 0.865987  |
| C  | -3.754468 | -4.359094 | 1.782865  |
| C  | -2.265969 | -4.789605 | -0.081905 |
| C  | -4.174861 | -5.692118 | 1.750634  |
| H  | -4.178784 | -3.692244 | 2.523101  |
| C  | -2.690183 | -6.120998 | -0.110672 |
| H  | -1.531149 | -4.455804 | -0.803807 |
| C  | -3.643552 | -6.572138 | 0.804892  |
| H  | -4.913668 | -6.042912 | 2.459553  |
| H  | -2.280367 | -6.802938 | -0.844409 |
| H  | -3.970988 | -7.603460 | 0.781291  |
| C  | -0.441880 | -1.876137 | 2.481646  |
| C  | 0.395169  | -2.702598 | 3.251489  |
| C  | -0.883308 | -0.654476 | 3.023450  |
| C  | 0.771844  | -2.319937 | 4.541888  |
| H  | 0.755167  | -3.643730 | 2.855730  |
| C  | -0.509842 | -0.279479 | 4.316146  |
| H  | -1.512699 | 0.007279  | 2.442052  |
| C  | 0.314626  | -1.113022 | 5.076109  |
| H  | 1.417244  | -2.960728 | 5.128606  |
| H  | -0.853347 | 0.661511  | 4.725968  |
| H  | 0.606333  | -0.819275 | 6.076062  |
| N  | -2.579557 | -1.750830 | -0.386240 |
| N  | -0.543640 | -1.207257 | 0.118892  |
| H  | 1.432677  | -2.696427 | -0.867673 |
| H  | 0.453122  | 1.195907  | 0.641625  |
| C  | 4.081571  | -2.297072 | -1.143026 |
| C  | 4.671541  | -3.154483 | -0.172566 |
| C  | 4.450239  | -2.404568 | -2.512393 |
| C  | 5.607216  | -4.115367 | -0.597113 |
| C  | 5.391382  | -3.381339 | -2.885999 |
| C  | 5.959738  | -4.225838 | -1.938090 |
| H  | 6.070819  | -4.787070 | 0.113331  |
| H  | 5.689511  | -3.494778 | -3.919984 |
| H  | 6.681527  | -4.971753 | -2.245388 |
| C  | 2.968470  | 2.253634  | 0.518126  |
| C  | 3.291972  | 3.237898  | -0.462726 |
| C  | 3.211575  | 2.520486  | 1.897708  |
| C  | 3.826914  | 4.468515  | -0.041414 |
| C  | 3.763178  | 3.763650  | 2.261199  |
| C  | 4.049984  | 4.728254  | 1.304073  |
| H  | 4.099302  | 5.229661  | -0.760109 |
| H  | 4.000014  | 3.987962  | 3.291761  |
| H  | 4.475634  | 5.676696  | 1.605893  |
| C  | 2.998860  | 1.461764  | 2.981985  |
| H  | 2.398561  | 0.613382  | 2.597019  |
| C  | 2.219340  | 2.009373  | 4.187013  |
| H  | 1.270075  | 2.474665  | 3.852927  |
| H  | 1.976874  | 1.182854  | 4.885724  |
| H  | 2.808392  | 2.758965  | 4.753901  |
| C  | 4.344025  | 0.877878  | 3.424993  |
| H  | 4.880146  | 0.455377  | 2.548304  |
| H  | 4.980882  | 1.658411  | 3.893311  |
| H  | 4.182716  | 0.059104  | 4.158632  |
| C  | 3.139542  | 2.979782  | -1.961944 |
| H  | 2.580385  | 2.039786  | -2.141743 |
| C  | 4.512891  | 2.807262  | -2.620704 |
| H  | 4.390732  | 2.542698  | -3.692786 |
| H  | 5.109134  | 3.741878  | -2.550519 |
| H  | 5.075539  | 1.989545  | -2.123845 |
| C  | 2.344004  | 4.093790  | -2.660605 |
| H  | 2.051624  | 3.765359  | -3.680849 |
| H  | 1.421971  | 4.329339  | -2.092765 |
| H  | 2.943121  | 5.023366  | -2.757081 |
| C  | 3.852604  | -1.497911 | -3.588599 |
| H  | 3.146406  | -0.764695 | -3.148321 |
| C  | 4.322911  | -3.061890 | 1.314668  |
| H  | 3.595120  | -2.247931 | 1.508865  |
| C  | 3.656178  | -4.351610 | 1.806609  |

|    |           |           |           |
|----|-----------|-----------|-----------|
| H  | 2.752275  | -4.565902 | 1.196726  |
| H  | 4.350070  | -5.215739 | 1.739369  |
| H  | 3.340191  | -4.236073 | 2.865527  |
| C  | 5.560383  | -2.723306 | 2.154832  |
| H  | 6.301863  | -3.549372 | 2.134249  |
| H  | 6.040008  | -1.798937 | 1.767591  |
| H  | 5.264619  | -2.543181 | 3.210649  |
| C  | 3.043067  | -2.310794 | -4.605734 |
| H  | 3.693792  | -3.007171 | -5.175474 |
| H  | 2.258461  | -2.898140 | -4.082144 |
| H  | 2.542510  | -1.628540 | -5.325718 |
| C  | 4.940839  | -0.670330 | -4.283736 |
| H  | 5.536311  | -0.115255 | -3.528081 |
| H  | 5.623867  | -1.315512 | -4.875231 |
| H  | 4.475198  | 0.069050  | -4.969971 |
| C  | -0.814931 | 2.340463  | -2.233844 |
| C  | -1.742192 | 2.042753  | -3.304739 |
| H  | -1.337750 | 1.845696  | -4.303912 |
| B  | -1.103312 | 3.223256  | -1.051152 |
| O  | -0.188117 | 3.521552  | -0.050374 |
| O  | -2.305826 | 3.935605  | -0.826331 |
| C  | -0.886323 | 4.180022  | 1.012166  |
| C  | -2.053586 | 4.875587  | 0.245721  |
| C  | -1.390494 | 3.117882  | 1.980362  |
| H  | -0.541769 | 2.525524  | 2.342827  |
| H  | -1.883919 | 3.561706  | 2.856922  |
| H  | -2.093086 | 2.427073  | 1.492218  |
| C  | 0.068117  | 5.126660  | 1.709179  |
| H  | -0.452927 | 5.741880  | 2.457226  |
| H  | 0.844462  | 4.554371  | 2.234142  |
| H  | 0.573133  | 5.793454  | 0.999573  |
| C  | -1.629345 | 6.189518  | -0.390341 |
| H  | -1.467575 | 6.975286  | 0.360774  |
| H  | -0.701157 | 6.066330  | -0.965655 |
| H  | -2.409762 | 6.539479  | -1.079996 |
| C  | -3.319062 | 5.055208  | 1.058046  |
| H  | -3.719985 | 4.096660  | 1.416526  |
| H  | -3.134528 | 5.685267  | 1.939880  |
| H  | -4.095751 | 5.560190  | 0.463548  |
| Na | -4.474915 | 3.142711  | -1.114197 |
| H  | -2.646645 | 2.661775  | -3.376334 |
| H  | 0.215679  | 1.999011  | -2.376399 |
| H  | -2.567431 | 0.622846  | -3.374029 |

139

Figure\_S4\_imid-3\_modeR1\_ts(CuHadd)\_03 / electronic energy: -3372.900750020183 a.u. / lowest freq: -693.02 cm<sup>-1</sup>

|    |           |           |           |
|----|-----------|-----------|-----------|
| C  | -2.817490 | 2.191578  | -0.529698 |
| H  | -3.475611 | 2.007654  | -1.393014 |
| C  | -1.319261 | 2.159884  | -0.903386 |
| H  | -0.776529 | 3.052216  | -0.550494 |
| C  | -1.801091 | 0.333990  | 0.531738  |
| C  | -4.197919 | 0.599000  | 0.896356  |
| C  | -4.670156 | 1.159650  | 2.085475  |
| C  | -4.968155 | -0.382920 | 0.254432  |
| C  | -5.890384 | 0.761208  | 2.626447  |
| H  | -4.056909 | 1.896667  | 2.607008  |
| C  | -6.187626 | -0.780581 | 0.798778  |
| C  | -6.652784 | -0.209335 | 1.981321  |
| H  | -6.238265 | 1.206150  | 3.561025  |
| H  | -6.761229 | -1.550905 | 0.280705  |
| H  | -7.609814 | -0.527895 | 2.400045  |
| C  | 0.563557  | 0.727182  | 0.102749  |
| C  | 1.556114  | 1.252306  | -0.748196 |
| C  | 0.980846  | 0.046276  | 1.266473  |
| C  | 2.913830  | 1.137181  | -0.430846 |
| C  | 2.343378  | -0.071136 | 1.586733  |
| C  | 3.305237  | 0.485088  | 0.738843  |
| H  | 4.354463  | 0.440963  | 1.004562  |
| S  | -4.414811 | -1.162455 | -1.262474 |
| O  | -5.354709 | -2.293604 | -1.503209 |
| O  | -3.048394 | -1.703111 | -0.951355 |
| O  | -4.432944 | -0.104469 | -2.286930 |
| Cu | -1.871381 | -1.455440 | 1.344108  |
| C  | -3.224236 | 3.470025  | 0.162131  |
| C  | -4.257035 | 4.263234  | -0.367293 |
| C  | -2.581464 | 3.883973  | 1.344680  |
| C  | -4.639032 | 5.445481  | 0.274071  |
| H  | -4.768171 | 3.968204  | -1.275194 |
| C  | -2.967246 | 5.066354  | 1.981993  |
| H  | -1.787324 | 3.286564  | 1.775621  |
| C  | -3.995039 | 5.846660  | 1.447210  |
| H  | -5.435356 | 6.051084  | -0.138916 |
| H  | -2.469986 | 5.376838  | 2.891783  |
| H  | -4.292851 | 6.762003  | 1.942021  |
| C  | -1.121524 | 2.034137  | -2.396054 |
| C  | -0.621389 | 3.122029  | -3.135148 |
| C  | -1.411837 | 0.833668  | -3.065875 |
| C  | -0.397248 | 2.999902  | -4.509770 |
| H  | -0.396851 | 4.062023  | -2.646972 |

|   |           |           |           |
|---|-----------|-----------|-----------|
| C | -1.184830 | 0.713836  | -4.439228 |
| H | -1.804294 | -0.010800 | -2.523822 |
| C | -0.675366 | 1.795594  | -5.160769 |
| H | -0.005218 | 3.838872  | -5.069957 |
| H | -1.402430 | -0.219085 | -4.943077 |
| H | -0.498497 | 1.701579  | -6.224344 |
| N | -2.941162 | 1.026080  | 0.369829  |
| N | -0.824293 | 0.965310  | -0.154266 |
| H | 0.251812  | -0.328514 | 1.970536  |
| H | 1.296492  | 1.785475  | -1.646615 |
| C | 2.762950  | -0.671946 | 2.873679  |
| C | 2.517565  | 0.025661  | 4.093497  |
| C | 3.457697  | -1.918071 | 2.896127  |
| C | 2.921575  | -0.562239 | 5.305914  |
| C | 3.883720  | -2.435369 | 4.133487  |
| C | 3.601558  | -1.773499 | 5.322000  |
| H | 2.732196  | -0.068940 | 6.250153  |
| H | 4.435264  | -3.364486 | 4.185339  |
| H | 3.924045  | -2.197526 | 6.264376  |
| C | 3.924477  | 1.793447  | -1.283590 |
| C | 4.618615  | 1.045698  | -2.275183 |
| C | 4.173908  | 3.187160  | -1.135457 |
| C | 5.537634  | 1.711077  | -3.107296 |
| C | 5.099855  | 3.806131  | -1.994829 |
| C | 5.772321  | 3.074345  | -2.967143 |
| H | 6.074523  | 1.174704  | -3.878555 |
| H | 5.304681  | 4.865688  | -1.916322 |
| H | 6.480623  | 3.568756  | -3.619583 |
| C | 3.463864  | 4.033339  | -0.077111 |
| H | 2.798487  | 3.411977  | 0.555659  |
| C | 2.566039  | 5.089598  | -0.731564 |
| H | 1.840661  | 4.597772  | -1.414399 |
| H | 1.991826  | 5.636470  | 0.046577  |
| H | 3.164509  | 5.824319  | -1.310354 |
| C | 4.466911  | 4.678110  | 0.887710  |
| H | 5.116451  | 3.896417  | 1.336866  |
| H | 5.105307  | 5.424637  | 0.370449  |
| H | 3.925171  | 5.191804  | 1.710636  |
| C | 4.379370  | -0.448810 | -2.482986 |
| H | 3.667461  | -0.844816 | -1.732973 |
| C | 5.671355  | -1.253719 | -2.295233 |
| H | 5.448645  | -2.341723 | -2.325505 |
| H | 6.410150  | -1.026586 | -3.092005 |
| H | 6.123289  | -1.020334 | -1.307650 |
| C | 3.754873  | -0.714891 | -3.858463 |
| H | 3.521370  | -1.794256 | -3.972272 |
| H | 2.807179  | -0.143327 | -3.960419 |
| H | 4.443468  | -0.418560 | -4.677453 |
| C | 3.772525  | -2.706354 | 1.623470  |
| H | 3.262249  | -2.259499 | 0.747072  |
| C | 1.865652  | 1.410229  | 4.131787  |
| H | 1.663013  | 1.790761  | 3.111823  |
| C | 0.513410  | 1.361925  | 4.852814  |
| H | -0.147271 | 0.609659  | 4.371228  |
| H | 0.638039  | 1.097104  | 5.923937  |
| H | 0.013050  | 2.351962  | 4.789817  |
| C | 2.796583  | 2.449472  | 4.770638  |
| H | 2.964739  | 2.238131  | 5.847356  |
| H | 3.776094  | 2.454191  | 4.245850  |
| H | 2.351761  | 3.463669  | 4.680083  |
| C | 3.272556  | -4.156687 | 1.711790  |
| H | 3.877173  | -4.754195 | 2.425475  |
| H | 2.213116  | -4.181333 | 2.039450  |
| H | 3.342228  | -4.642075 | 0.715108  |
| C | 5.275386  | -2.674637 | 1.323384  |
| H | 5.628949  | -1.625516 | 1.243638  |
| H | 5.852942  | -3.184365 | 2.123606  |
| H | 5.481035  | -3.183714 | 0.357487  |
| C | -0.612821 | -3.088402 | 1.670409  |
| C | -1.909814 | -3.233471 | 2.289787  |
| H | -1.960402 | -3.289473 | 3.381868  |
| B | -0.258662 | -3.457954 | 0.260026  |
| O | 1.003504  | -3.294669 | -0.292514 |
| O | -1.125583 | -4.055943 | -0.685809 |
| C | 0.889751  | -3.456202 | -1.709977 |
| C | -0.324448 | -4.429939 | -1.834757 |
| C | 0.574212  | -2.087395 | -2.291370 |
| H | 1.359496  | -1.379289 | -2.000001 |
| H | 0.513922  | -2.093468 | -3.388355 |
| H | -0.377802 | -1.718477 | -1.885819 |
| C | 2.196937  | -3.996141 | -2.245833 |
| H | 2.153325  | -4.151524 | -3.333456 |
| H | 3.002978  | -3.281234 | -2.037296 |
| H | 2.472842  | -4.944145 | -1.768850 |
| C | 0.074690  | -5.885588 | -1.659184 |
| H | 0.639957  | -6.260446 | -2.523992 |
| H | 0.690804  | -6.022659 | -0.759666 |
| H | -0.823290 | -6.509651 | -1.551798 |

C -1.146323 -4.243310 -3.093972  
H -1.590199 -3.240465 -3.145881  
H -0.525523 -4.385803 -3.990345  
H -1.957668 -4.985092 -3.153640  
Na -3.422707 -3.961952 -0.885826  
H -2.618955 -3.940280 1.838162  
H 0.195663 -2.719604 2.312972  
H -3.024280 -1.954015 2.350442

139

Figure\_S4\_imid-3\_modeR1\_prod(CuHadd) / electronic energy: -3372.945446709363 a.u. / lowest freq: 6.10 cm-1

C 1.666549 2.991780 0.719367  
H 2.307062 2.833228 1.600024  
C 0.205816 2.529047 0.938592  
H -0.518421 3.338143 0.754282  
C 1.197461 1.170769 -0.733560  
C 3.384734 2.180504 -0.996420  
C 3.413787 2.710479 -2.290453  
C 4.591021 1.816344 -0.379433  
C 4.622496 2.917892 -2.949189  
H 2.467239 2.965085 -2.772672  
C 5.801555 2.045580 -1.035626  
C 5.821637 2.608635 -2.309593  
H 4.625418 3.332352 -3.959375  
H 6.725762 1.749954 -0.535499  
H 6.775724 2.785865 -2.810647  
C -1.141651 0.748539 -0.254593  
C -2.353509 1.435956 -0.418661  
C -1.150056 -0.651594 -0.162962  
C -3.562947 0.734292 -0.478669  
C -2.364928 -1.351362 -0.176545  
C -3.567981 -0.657302 -0.347653  
H -4.507483 -1.197765 -0.367184  
S 4.592062 0.853529 1.137862  
O 5.995498 0.355950 1.262433  
O 3.677677 -0.287920 0.820761  
O 4.147538 1.723113 2.239133  
Cu 1.830815 -0.392645 -1.655276  
C 1.770408 4.429310 0.268590  
C 2.547568 5.344857 0.999627  
C 1.111503 4.868382 -0.895565  
C 2.662235 6.671859 0.574367  
H 3.068365 5.032851 1.896342  
C 1.229834 6.195703 -1.316766  
H 0.510573 4.181338 -1.478319  
C 2.004482 7.096826 -0.582575  
H 3.263203 7.370894 1.141487  
H 0.721870 6.525270 -2.213835  
H 2.095766 8.124210 -0.910516  
C -0.039738 1.960224 2.316780  
C -0.978574 2.559726 3.174118  
C 0.609994 0.782948 2.733825  
C -1.270306 1.985884 4.415313  
H -1.492588 3.465283 2.879061  
C 0.314192 0.211644 3.973883  
H 1.326731 0.295195 2.088616  
C -0.627168 0.811333 4.813362  
H -2.000201 2.449150 5.066439  
H 0.808218 -0.701701 4.279454  
H -0.859547 0.364953 5.771483  
N 2.127616 2.062682 -0.341434  
N 0.061576 1.473856 -0.086557  
H -0.219942 -1.185606 -0.035491  
H -2.358460 2.515952 -0.498934  
C -2.399604 -2.809237 0.051862  
C -2.372218 -3.701258 -1.056512  
C -2.619577 -3.309444 1.368262  
C -2.571574 -5.074709 -0.826488  
C -2.831198 -4.689434 1.541367  
C -2.797674 -5.559454 0.457024  
H -2.581968 -5.777955 -1.648255  
H -3.040815 -5.100194 2.519454  
H -2.963851 -6.617926 0.611003  
C -4.833689 1.462532 -0.656431  
C -5.476585 2.055699 0.466390  
C -5.411726 1.575021 -1.952278  
C -6.676496 2.762605 0.265590  
C -6.616306 2.287025 -2.098499  
C -7.236930 2.874782 -1.001926  
H -7.188357 3.230611 1.096102  
H -7.081753 2.392782 -3.069607  
H -8.162038 3.420848 -1.135388  
C -4.764551 0.952732 -3.190264  
H -3.825481 0.423655 -2.930236  
C -4.372999 2.029103 -4.209922  
H -3.710407 2.781362 -3.730608  
H -3.818807 1.567853 -5.055248  
H -5.267728 2.545058 -4.617395  
C -5.682998 -0.099653 -3.823423

|    |           |           |           |
|----|-----------|-----------|-----------|
| H  | -5.977153 | -0.853466 | -3.062259 |
| H  | -6.600844 | 0.364356  | -4.241794 |
| H  | -5.149507 | -0.625170 | -4.644206 |
| C  | -4.910357 | 1.945091  | 1.882731  |
| H  | -3.983105 | 1.336607  | 1.899332  |
| C  | -5.894525 | 1.234795  | 2.820528  |
| H  | -5.413009 | 1.047854  | 3.804277  |
| H  | -6.806703 | 1.845198  | 2.987742  |
| H  | -6.192562 | 0.256082  | 2.388265  |
| C  | -4.528601 | 3.325374  | 2.429769  |
| H  | -4.052512 | 3.220676  | 3.427750  |
| H  | -3.802564 | 3.815194  | 1.746034  |
| H  | -5.419947 | 3.978899  | 2.535042  |
| C  | -2.724159 | -2.380374 | 2.580884  |
| H  | -2.348909 | -1.366347 | 2.330463  |
| C  | -2.215196 | -3.202511 | -2.493392 |
| H  | -1.943814 | -2.127034 | -2.510665 |
| C  | -1.085654 | -3.929375 | -3.235905 |
| H  | -0.152258 | -3.894052 | -2.640491 |
| H  | -1.343638 | -4.990337 | -3.434940 |
| H  | -0.892641 | -3.431936 | -4.210397 |
| C  | -3.539348 | -3.332642 | -3.253407 |
| H  | -3.837412 | -4.397780 | -3.356022 |
| H  | -4.341199 | -2.787441 | -2.711722 |
| H  | -3.443027 | -2.889840 | -4.267783 |
| C  | -1.868780 | -2.856767 | 3.765239  |
| H  | -2.287526 | -3.773798 | 4.229205  |
| H  | -0.830646 | -3.064699 | 3.439878  |
| H  | -1.833278 | -2.066380 | 4.545071  |
| C  | -4.187765 | -2.221442 | 3.004521  |
| H  | -4.792780 | -1.849569 | 2.151055  |
| H  | -4.609666 | -3.191202 | 3.344680  |
| H  | -4.268058 | -1.485571 | 3.833039  |
| C  | 2.582862  | -2.026191 | -2.473397 |
| C  | 3.888113  | -1.769564 | -3.208343 |
| H  | 4.342274  | -2.673895 | -3.660418 |
| B  | 2.593883  | -2.901535 | -1.237698 |
| O  | 1.485771  | -3.527580 | -0.674576 |
| O  | 3.744905  | -3.204312 | -0.467774 |
| C  | 1.848821  | -4.007211 | 0.628776  |
| C  | 3.380306  | -4.244084 | 0.473257  |
| C  | 1.537286  | -2.908144 | 1.632658  |
| H  | 0.470491  | -2.664709 | 1.568353  |
| H  | 1.743732  | -3.218815 | 2.666724  |
| H  | 2.108489  | -1.993387 | 1.418452  |
| C  | 1.050969  | -5.254420 | 0.938933  |
| H  | 1.385623  | -5.713779 | 1.880387  |
| H  | -0.008713 | -4.997786 | 1.055591  |
| H  | 1.127048  | -6.001690 | 0.139703  |
| C  | 3.702623  | -5.578488 | -0.180278 |
| H  | 3.510236  | -6.422782 | 0.496245  |
| H  | 3.107837  | -5.726329 | -1.092485 |
| H  | 4.764494  | -5.608053 | -0.460356 |
| C  | 4.169213  | -4.074309 | 1.754998  |
| H  | 4.071398  | -3.061869 | 2.171163  |
| H  | 3.816658  | -4.779225 | 2.521604  |
| H  | 5.237114  | -4.289617 | 1.596322  |
| Na | 5.401566  | -1.733125 | 0.131327  |
| H  | 4.666274  | -1.347570 | -2.547295 |
| H  | 1.764303  | -2.315922 | -3.156116 |
| H  | 3.788104  | -1.038877 | -4.028072 |

139

Figure\_S4\_imid-3\_modeR2\_ed(CuHadd) / electronic energy: -3372.921836660248 a.u. / lowest freq: 3.97 cm<sup>-1</sup>

|   |           |           |           |
|---|-----------|-----------|-----------|
| C | 2.242230  | -2.208189 | 1.100301  |
| H | 2.332332  | -3.170969 | 0.568378  |
| C | 0.787132  | -1.866490 | 1.437320  |
| H | 0.712311  | -1.139929 | 2.266003  |
| C | 1.433823  | -0.682658 | -0.479896 |
| C | 3.839553  | -1.040328 | -0.510489 |
| C | 4.806321  | -0.263843 | 0.133588  |
| C | 4.176866  | -1.688652 | -1.710494 |
| C | 6.090733  | -0.137371 | -0.384613 |
| H | 4.529073  | 0.282485  | 1.034835  |
| C | 5.470132  | -1.559982 | -2.223880 |
| C | 6.427857  | -0.796295 | -1.564153 |
| H | 6.822617  | 0.486799  | 0.132039  |
| H | 5.710061  | -2.078363 | -3.153880 |
| H | 7.434390  | -0.709866 | -1.978786 |
| C | -0.876539 | -0.526284 | 0.113627  |
| C | -2.020511 | -1.240159 | -0.265534 |
| C | -0.990281 | 0.827654  | 0.464712  |
| C | -3.271599 | -0.609274 | -0.281961 |
| C | -2.242552 | 1.455500  | 0.462499  |
| C | -3.381944 | 0.734467  | 0.089975  |
| H | -4.353398 | 1.215420  | 0.097301  |
| S | 3.010657  | -2.579209 | -2.750031 |
| O | 2.331005  | -1.498784 | -3.542356 |
| O | 2.020158  | -3.259871 | -1.865110 |

|    |           |           |           |
|----|-----------|-----------|-----------|
| O  | 3.825092  | -3.489173 | -3.568844 |
| Cu | 1.252941  | 0.404364  | -2.134455 |
| C  | 3.169235  | -2.178456 | 2.289378  |
| C  | 3.937733  | -3.312235 | 2.607365  |
| C  | 3.286784  | -1.028690 | 3.093072  |
| C  | 4.806857  | -3.293593 | 3.702455  |
| H  | 3.867331  | -4.211317 | 2.007913  |
| C  | 4.158250  | -1.013747 | 4.185235  |
| H  | 2.713167  | -0.140281 | 2.869287  |
| C  | 4.917653  | -2.145383 | 4.490181  |
| H  | 5.395764  | -4.170110 | 3.939805  |
| H  | 4.245701  | -0.123295 | 4.794261  |
| H  | 5.592141  | -2.132541 | 5.336512  |
| C  | -0.052120 | -3.075710 | 1.762520  |
| C  | -0.631881 | -3.204220 | 3.037706  |
| C  | -0.257192 | -4.096000 | 0.815376  |
| C  | -1.386938 | -4.335117 | 3.361092  |
| H  | -0.492938 | -2.434714 | 3.786892  |
| C  | -1.018636 | -5.221825 | 1.141223  |
| H  | 0.166948  | -4.019738 | -0.175439 |
| C  | -1.578071 | -5.344284 | 2.414832  |
| H  | -1.826505 | -4.427923 | 4.345726  |
| H  | -1.173351 | -6.000845 | 0.406067  |
| H  | -2.166855 | -6.216958 | 2.665903  |
| N  | 2.550576  | -1.158742 | 0.094417  |
| N  | 0.373665  | -1.183150 | 0.193436  |
| H  | -0.112375 | 1.379039  | 0.773769  |
| H  | -1.940327 | -2.282059 | -0.546838 |
| C  | -2.374623 | 2.855560  | 0.910580  |
| C  | -2.328009 | 3.160177  | 2.301031  |
| C  | -2.581926 | 3.894143  | -0.041274 |
| C  | -2.459449 | 4.500932  | 2.706180  |
| C  | -2.745684 | 5.213417  | 0.419397  |
| C  | -2.672381 | 5.511540  | 1.775452  |
| H  | -2.413938 | 4.769125  | 3.753388  |
| H  | -2.920477 | 6.024253  | -0.275214 |
| H  | -2.785522 | 6.535213  | 2.108542  |
| C  | -4.481023 | -1.358294 | -0.670677 |
| C  | -4.906203 | -1.364410 | -2.028398 |
| C  | -5.253307 | -2.021989 | 0.322910  |
| C  | -6.091352 | -2.043572 | -2.365298 |
| C  | -6.441284 | -2.670171 | -0.062065 |
| C  | -6.848894 | -2.684969 | -1.391482 |
| H  | -6.442440 | -2.068817 | -3.388516 |
| H  | -7.062293 | -3.168229 | 0.670649  |
| H  | -7.763572 | -3.193186 | -1.668776 |
| C  | -4.844459 | -2.033439 | 1.796189  |
| H  | -3.851082 | -1.561433 | 1.940156  |
| C  | -4.706529 | -3.465532 | 2.327490  |
| H  | -4.035369 | -4.050948 | 1.664344  |
| H  | -4.266427 | -3.450422 | 3.347293  |
| H  | -5.690539 | -3.976148 | 2.382575  |
| C  | -5.832441 | -1.223456 | 2.642581  |
| H  | -5.898663 | -0.184115 | 2.254897  |
| H  | -6.844758 | -1.679868 | 2.624009  |
| H  | -5.483014 | -1.177508 | 3.696280  |
| C  | -4.126916 | -0.642710 | -3.127915 |
| H  | -3.222209 | -0.149014 | -2.720165 |
| C  | -4.968481 | 0.472606  | -3.759841 |
| H  | -4.348127 | 1.061908  | -4.468597 |
| H  | -5.837449 | 0.058663  | -4.313333 |
| H  | -5.339956 | 1.159980  | -2.970309 |
| C  | -3.628031 | -1.628614 | -4.190584 |
| H  | -2.989118 | -1.099600 | -4.929610 |
| H  | -3.017495 | -2.423201 | -3.710612 |
| H  | -4.473408 | -2.101390 | -4.733250 |
| C  | -2.636779 | 3.623227  | -1.545342 |
| H  | -2.416920 | 2.559444  | -1.767829 |
| C  | -2.166289 | 2.076590  | 3.369562  |
| H  | -2.129190 | 1.065633  | 2.917096  |
| C  | -0.850690 | 2.249379  | 4.137791  |
| H  | 0.006564  | 2.217804  | 3.432900  |
| H  | -0.828986 | 3.212446  | 4.689778  |
| H  | -0.724260 | 1.421171  | 4.867425  |
| C  | -3.366842 | 2.053085  | 4.324281  |
| H  | -3.421754 | 2.981729  | 4.930093  |
| H  | -4.309031 | 1.942382  | 3.745496  |
| H  | -3.284243 | 1.188242  | 5.016949  |
| C  | -1.576586 | 4.433177  | -2.303077 |
| H  | -1.791548 | 5.521516  | -2.266077 |
| H  | -0.574968 | 4.251499  | -1.864315 |
| H  | -1.549071 | 4.119209  | -3.368426 |
| C  | -4.038509 | 3.903129  | -2.098598 |
| H  | -4.791481 | 3.302057  | -1.545574 |
| H  | -4.299507 | 4.978496  | -2.005106 |
| H  | -4.088080 | 3.619345  | -3.171605 |
| C  | 2.804624  | 1.726096  | -2.399638 |
| C  | 1.840416  | 1.836197  | -3.413935 |

|    |           |           |           |
|----|-----------|-----------|-----------|
| H  | 1.994343  | 1.379531  | -4.396909 |
| B  | 2.759360  | 2.620160  | -1.150160 |
| O  | 3.796883  | 2.798775  | -0.259542 |
| O  | 1.658426  | 3.383562  | -0.824393 |
| C  | 3.295066  | 3.608512  | 0.832758  |
| C  | 2.081050  | 4.340468  | 0.169802  |
| C  | 2.869277  | 2.661198  | 1.941743  |
| H  | 3.736614  | 2.079233  | 2.281774  |
| H  | 2.474419  | 3.200886  | 2.813305  |
| H  | 2.099889  | 1.957461  | 1.593382  |
| C  | 4.398325  | 4.524588  | 1.314293  |
| H  | 4.026692  | 5.212177  | 2.088008  |
| H  | 5.213987  | 3.936124  | 1.755985  |
| H  | 4.821462  | 5.122271  | 0.497891  |
| C  | 2.491074  | 5.602113  | -0.573190 |
| H  | 2.758149  | 6.415529  | 0.115217  |
| H  | 3.347158  | 5.416748  | -1.236878 |
| H  | 1.652422  | 5.944776  | -1.194003 |
| C  | 0.929549  | 4.629885  | 1.104980  |
| H  | 0.494616  | 3.710132  | 1.509845  |
| H  | 1.251810  | 5.260367  | 1.945882  |
| H  | 0.138646  | 5.169309  | 0.569338  |
| Na | 0.115110  | -2.214699 | -3.073179 |
| H  | 1.091942  | 2.634898  | -3.378931 |
| H  | 3.691808  | 1.110040  | -2.595290 |
| H  | -0.206239 | 0.032097  | -2.733340 |

139

Figure\_S4\_imid-3\_modeR2\_ts(CuHadd)\_01 / electronic energy: -3372.896178322465 a.u. / lowest freq: -766.58 cm-1

|    |           |           |           |
|----|-----------|-----------|-----------|
| C  | 2.447560  | -1.850732 | 1.216380  |
| H  | 2.605068  | -2.851607 | 0.777565  |
| C  | 0.977220  | -1.588084 | 1.577363  |
| H  | 0.882291  | -0.814334 | 2.361385  |
| C  | 1.477494  | -0.480073 | -0.420372 |
| C  | 3.884581  | -0.643929 | -0.523153 |
| C  | 4.580244  | 0.536975  | -0.250201 |
| C  | 4.403808  | -1.553913 | -1.456081 |
| C  | 5.795675  | 0.804493  | -0.869712 |
| H  | 4.133776  | 1.260380  | 0.434014  |
| C  | 5.626654  | -1.277501 | -2.075860 |
| C  | 6.324450  | -0.110456 | -1.780542 |
| H  | 6.321424  | 1.736525  | -0.650780 |
| H  | 6.014521  | -1.987192 | -2.809639 |
| H  | 7.277676  | 0.090817  | -2.274567 |
| C  | -0.843110 | -0.552072 | 0.172861  |
| C  | -1.846575 | -1.418899 | -0.277353 |
| C  | -1.168461 | 0.766169  | 0.519869  |
| C  | -3.173911 | -0.979415 | -0.354084 |
| C  | -2.498860 | 1.204959  | 0.456453  |
| C  | -3.500732 | 0.326106  | 0.027216  |
| H  | -4.531494 | 0.658538  | -0.014521 |
| S  | 3.594873  | -3.095277 | -1.921120 |
| O  | 3.889848  | -3.230505 | -3.378144 |
| O  | 2.128918  | -2.892482 | -1.720861 |
| O  | 4.184312  | -4.132241 | -1.058602 |
| Cu | 1.464776  | 0.616056  | -1.979732 |
| C  | 3.401197  | -1.634017 | 2.362419  |
| C  | 4.211330  | -2.690524 | 2.813705  |
| C  | 3.509761  | -0.376280 | 2.984527  |
| C  | 5.109157  | -2.492174 | 3.867114  |
| H  | 4.149847  | -3.667870 | 2.351350  |
| C  | 4.409592  | -0.182038 | 4.035745  |
| H  | 2.901470  | 0.453730  | 2.652562  |
| C  | 5.208495  | -1.239294 | 4.477346  |
| H  | 5.729387  | -3.310346 | 4.209653  |
| H  | 4.488019  | 0.789096  | 4.507154  |
| H  | 5.904998  | -1.087667 | 5.291762  |
| C  | 0.230663  | -2.825950 | 2.004699  |
| C  | -0.343896 | -2.891203 | 3.286929  |
| C  | 0.098497  | -3.929857 | 1.141959  |
| C  | -1.021681 | -4.041440 | 3.700860  |
| H  | -0.263528 | -2.055095 | 3.970476  |
| C  | -0.581039 | -5.077316 | 1.559973  |
| H  | 0.514770  | -3.901403 | 0.144746  |
| C  | -1.135023 | -5.135671 | 2.840582  |
| H  | -1.459746 | -4.084307 | 4.689589  |
| H  | -0.679306 | -5.921443 | 0.889856  |
| H  | -1.662379 | -6.024371 | 3.162142  |
| N  | 2.642398  | -0.858330 | 0.141833  |
| N  | 0.481271  | -1.020723 | 0.308561  |
| H  | -0.393266 | 1.434474  | 0.869961  |
| H  | -1.597535 | -2.432102 | -0.566482 |
| C  | -2.855457 | 2.573512  | 0.884085  |
| C  | -2.842903 | 2.909220  | 2.268868  |
| C  | -3.236619 | 3.549174  | -0.082514 |
| C  | -3.176488 | 4.221063  | 2.652010  |
| C  | -3.604173 | 4.833665  | 0.359090  |
| C  | -3.559851 | 5.166387  | 1.707957  |
| H  | -3.159003 | 4.514495  | 3.693263  |



|    |           |           |           |
|----|-----------|-----------|-----------|
| H  | -3.913930 | 5.593661  | -0.345827 |
| H  | -3.828846 | 6.165751  | 2.025130  |
| C  | -4.231623 | -1.886199 | -0.837366 |
| C  | -4.522367 | -1.957742 | -2.228323 |
| C  | -4.990649 | -2.650713 | 0.091641  |
| C  | -5.564020 | -2.798376 | -2.661366 |
| C  | -6.036615 | -3.459337 | -0.389687 |
| C  | -6.313092 | -3.535232 | -1.750471 |
| H  | -5.809618 | -2.877926 | -3.712199 |
| H  | -6.645752 | -4.039126 | 0.291074  |
| H  | -7.117823 | -4.168143 | -2.102095 |
| C  | -4.713683 | -2.610488 | 1.594604  |
| H  | -3.812601 | -2.003822 | 1.819335  |
| C  | -4.421995 | -4.011398 | 2.146947  |
| H  | -3.626446 | -4.497257 | 1.543573  |
| H  | -4.069872 | -3.938735 | 3.198090  |
| H  | -5.327622 | -4.652998 | 2.128035  |
| C  | -5.875696 | -1.952163 | 2.346115  |
| H  | -6.053839 | -0.930657 | 1.946582  |
| H  | -6.808178 | -2.546563 | 2.243095  |
| H  | -5.629193 | -1.863125 | 3.425822  |
| C  | -3.750863 | -1.138876 | -3.263835 |
| H  | -2.972122 | -0.513239 | -2.782433 |
| C  | -4.678601 | -0.164660 | -3.999856 |
| H  | -4.082181 | 0.510301  | -4.650390 |
| H  | -5.412298 | -0.705903 | -4.633521 |
| H  | -5.230702 | 0.459500  | -3.265518 |
| C  | -3.011675 | -2.050795 | -4.250064 |
| H  | -2.382398 | -1.440900 | -4.932979 |
| H  | -2.346830 | -2.747250 | -3.695544 |
| H  | -3.722616 | -2.643518 | -4.863301 |
| C  | -3.258823 | 3.251219  | -1.583079 |
| H  | -2.873119 | 2.233768  | -1.795166 |
| C  | -2.507338 | 1.885846  | 3.356287  |
| H  | -2.333952 | 0.880244  | 2.924722  |
| C  | -1.217781 | 2.266512  | 4.093385  |
| H  | -0.377092 | 2.345943  | 3.372214  |
| H  | -1.328718 | 3.234607  | 4.625621  |
| H  | -0.958421 | 1.482353  | 4.836435  |
| C  | -3.674373 | 1.710367  | 4.336795  |
| H  | -3.850213 | 2.632847  | 4.928745  |
| H  | -4.601852 | 1.455191  | 3.780363  |
| H  | -3.455782 | 0.880040  | 5.042041  |
| C  | -2.347445 | 4.208287  | -2.362632 |
| H  | -2.730270 | 5.249776  | -2.335137 |
| H  | -1.325385 | 4.191435  | -1.935159 |
| H  | -2.281778 | 3.888840  | -3.424747 |
| C  | -4.691125 | 3.298366  | -2.127400 |
| H  | -5.332973 | 2.582605  | -1.571027 |
| H  | -5.123671 | 4.316687  | -2.032117 |
| H  | -4.700269 | 3.011402  | -3.200569 |
| C  | 2.543225  | 2.268691  | -2.599865 |
| C  | 1.536828  | 1.877970  | -3.565647 |
| H  | 1.870220  | 1.588235  | -4.568133 |
| B  | 2.296567  | 3.144637  | -1.397819 |
| O  | 3.300957  | 3.610302  | -0.545645 |
| O  | 1.048686  | 3.636920  | -1.007698 |
| C  | 2.654312  | 4.259492  | 0.564020  |
| C  | 1.290126  | 4.691732  | -0.058823 |
| C  | 2.480498  | 3.226541  | 1.668289  |
| H  | 3.465244  | 2.840436  | 1.967645  |
| H  | 2.007004  | 3.649944  | 2.565140  |
| H  | 1.870669  | 2.378044  | 1.323318  |
| C  | 3.517643  | 5.405786  | 1.044719  |
| H  | 3.007381  | 5.978598  | 1.832970  |
| H  | 4.457907  | 5.024378  | 1.466395  |
| H  | 3.772329  | 6.093710  | 0.229239  |
| C  | 1.395477  | 5.993851  | -0.839527 |
| H  | 1.518499  | 6.863134  | -0.178071 |
| H  | 2.241206  | 5.972265  | -1.541230 |
| H  | 0.477574  | 6.141188  | -1.424835 |
| C  | 0.144948  | 4.766266  | 0.925823  |
| H  | -0.073687 | 3.790257  | 1.371985  |
| H  | 0.367227  | 5.473505  | 1.738136  |
| H  | -0.763014 | 5.119544  | 0.421926  |
| Na | 1.598694  | -2.355337 | -3.920572 |
| H  | 0.624696  | 2.486810  | -3.613651 |
| H  | 3.564063  | 1.907318  | -2.780539 |
| H  | 0.752318  | 0.513276  | -3.425487 |

139

Figure\_S4\_imid-3\_modeR2\_ts(CuHadd)\_02 / electronic energy: -3372.902173985523 a.u. / lowest freq: -659.52 cm<sup>-1</sup>

|   |           |           |           |
|---|-----------|-----------|-----------|
| C | -2.705361 | -1.470468 | -1.252734 |
| H | -3.162198 | -2.333798 | -0.746261 |
| C | -1.177020 | -1.613839 | -1.427496 |
| H | -0.859584 | -1.428990 | -2.466738 |
| C | -1.620462 | 0.175890  | 0.064010  |
| C | -4.036275 | 0.316618  | -0.004573 |
| C | -4.234957 | 1.642042  | -0.411332 |

|    |           |           |           |
|----|-----------|-----------|-----------|
| C  | -5.052130 | -0.343336 | 0.707065  |
| C  | -5.429873 | 2.299473  | -0.141378 |
| H  | -3.426369 | 2.153626  | -0.938831 |
| C  | -6.254179 | 0.323220  | 0.965596  |
| C  | -6.449306 | 1.633066  | 0.538535  |
| H  | -5.562053 | 3.333356  | -0.468611 |
| H  | -7.026892 | -0.202384 | 1.529350  |
| H  | -7.395302 | 2.137351  | 0.747954  |
| C  | 0.730659  | -0.370737 | -0.277117 |
| C  | 1.694071  | -0.659521 | -1.262478 |
| C  | 1.164025  | -0.028627 | 1.015959  |
| C  | 3.060585  | -0.629512 | -0.953242 |
| C  | 2.529550  | -0.009927 | 1.326937  |
| C  | 3.475113  | -0.303415 | 0.340553  |
| H  | 4.530687  | -0.308350 | 0.587271  |
| S  | -4.864067 | -2.005561 | 1.367877  |
| O  | -5.838791 | -2.072880 | 2.499801  |
| O  | -3.467642 | -2.076443 | 1.893388  |
| O  | -5.154210 | -2.943074 | 0.269220  |
| Cu | -1.600432 | 1.533010  | 1.412843  |
| C  | -3.423612 | -1.220733 | -2.557541 |
| C  | -4.405453 | -2.118063 | -3.013320 |
| C  | -3.129688 | -0.081469 | -3.329361 |
| C  | -5.082924 | -1.874983 | -4.212109 |
| H  | -4.647635 | -3.006489 | -2.444792 |
| C  | -3.809783 | 0.158359  | -4.526120 |
| H  | -2.374694 | 0.619224  | -3.001154 |
| C  | -4.786732 | -0.737273 | -4.966928 |
| H  | -5.838498 | -2.569456 | -4.555988 |
| H  | -3.579061 | 1.038969  | -5.111551 |
| H  | -5.313088 | -0.550728 | -5.894031 |
| C  | -0.684085 | -2.977076 | -1.002468 |
| C  | -0.274361 | -3.910099 | -1.970666 |
| C  | -0.635700 | -3.338263 | 0.357718  |
| C  | 0.167549  | -5.179288 | -1.586148 |
| H  | -0.304275 | -3.659605 | -3.023722 |
| C  | -0.179084 | -4.603217 | 0.737395  |
| H  | -0.939954 | -2.638322 | 1.124443  |
| C  | 0.220282  | -5.523738 | -0.233570 |
| H  | 0.478334  | -5.893581 | -2.337526 |
| H  | -0.138225 | -4.871816 | 1.784633  |
| H  | 0.571818  | -6.503732 | 0.061849  |
| N  | -2.808303 | -0.300508 | -0.357744 |
| N  | -0.654544 | -0.535849 | -0.554088 |
| H  | 0.444208  | 0.151748  | 1.802396  |
| H  | 1.389051  | -0.929268 | -2.264899 |
| C  | 2.972504  | 0.220794  | 2.715327  |
| C  | 3.517887  | 1.480435  | 3.090186  |
| C  | 2.897022  | -0.836909 | 3.665869  |
| C  | 3.989963  | 1.651081  | 4.404558  |
| C  | 3.353026  | -0.604407 | 4.976257  |
| C  | 3.898268  | 0.622965  | 5.336206  |
| H  | 4.431126  | 2.588215  | 4.717052  |
| H  | 3.302282  | -1.383224 | 5.725717  |
| H  | 4.257835  | 0.777232  | 6.345527  |
| C  | 4.067236  | -0.998783 | -1.969564 |
| C  | 4.587930  | -2.323339 | -2.001573 |
| C  | 4.557667  | -0.018700 | -2.877531 |
| C  | 5.600282  | -2.632508 | -2.928847 |
| C  | 5.550902  | -0.385439 | -3.803526 |
| C  | 6.067896  | -1.675742 | -3.822709 |
| H  | 6.034606  | -3.622716 | -2.964779 |
| H  | 5.941273  | 0.335201  | -4.510114 |
| H  | 6.841492  | -1.935488 | -4.533982 |
| C  | 4.051975  | 1.421729  | -2.867393 |
| H  | 3.294214  | 1.562765  | -2.076611 |
| C  | 3.363111  | 1.776792  | -4.190345 |
| H  | 2.541228  | 1.057199  | -4.393719 |
| H  | 2.923370  | 2.794900  | -4.130562 |
| H  | 4.080567  | 1.754077  | -5.037332 |
| C  | 5.180299  | 2.408550  | -2.544400 |
| H  | 5.663872  | 2.129375  | -1.583585 |
| H  | 5.948526  | 2.420642  | -3.345788 |
| H  | 4.767832  | 3.434741  | -2.437396 |
| C  | 4.094697  | -3.414847 | -1.050584 |
| H  | 3.235407  | -3.060698 | -0.444760 |
| C  | 5.193181  | -3.808133 | -0.057186 |
| H  | 4.798790  | -4.545478 | 0.674429  |
| H  | 6.063778  | -4.258016 | -0.579764 |
| H  | 5.534370  | -2.911980 | 0.504057  |
| C  | 3.584066  | -4.640403 | -1.818993 |
| H  | 3.115794  | -5.359895 | -1.114280 |
| H  | 2.820355  | -4.329876 | -2.563403 |
| H  | 4.408068  | -5.163904 | -2.346911 |
| C  | 2.356322  | -2.222556 | 3.305052  |
| H  | 2.074288  | -2.281312 | 2.234828  |
| C  | 3.614655  | 2.648068  | 2.108603  |
| H  | 3.127004  | 2.397535  | 1.145197  |

|    |           |           |           |
|----|-----------|-----------|-----------|
| C  | 2.882740  | 3.888809  | 2.636440  |
| H  | 1.828055  | 3.635178  | 2.872307  |
| H  | 3.369296  | 4.293434  | 3.548066  |
| H  | 2.885092  | 4.685812  | 1.864495  |
| C  | 5.077378  | 2.969018  | 1.783275  |
| H  | 5.620539  | 3.321119  | 2.685707  |
| H  | 5.585239  | 2.063497  | 1.387605  |
| H  | 5.129277  | 3.761039  | 1.005646  |
| C  | 1.084167  | -2.539455 | 4.099469  |
| H  | 1.292238  | -2.594900 | 5.188677  |
| H  | 0.319748  | -1.753903 | 3.917775  |
| H  | 0.663297  | -3.513716 | 3.772677  |
| C  | 3.421563  | -3.306996 | 3.508942  |
| H  | 4.343774  | -3.042004 | 2.949018  |
| H  | 3.674943  | -3.429529 | 4.582833  |
| H  | 3.050357  | -4.280608 | 3.122807  |
| C  | -2.203444 | 3.504964  | 1.648890  |
| C  | -1.654425 | 2.948448  | 2.860601  |
| H  | -2.297517 | 2.880254  | 3.743755  |
| B  | -1.369378 | 3.945557  | 0.473066  |
| O  | -1.877728 | 4.440702  | -0.728820 |
| O  | 0.026605  | 3.906925  | 0.450811  |
| C  | -0.792960 | 4.432314  | -1.676732 |
| C  | 0.458121  | 4.573105  | -0.748146 |
| C  | -0.831139 | 3.092694  | -2.398084 |
| H  | -1.798365 | 2.987071  | -2.908843 |
| H  | -0.041121 | 3.002002  | -3.156704 |
| H  | -0.728187 | 2.257919  | -1.687852 |
| C  | -0.979090 | 5.566333  | -2.661362 |
| H  | -0.119963 | 5.638252  | -3.344465 |
| H  | -1.876051 | 5.395011  | -3.272203 |
| H  | -1.099440 | 6.532216  | -2.155904 |
| C  | 0.755011  | 6.022694  | -0.396655 |
| H  | 1.157202  | 6.578816  | -1.255314 |
| H  | -0.147713 | 6.541217  | -0.044163 |
| H  | 1.499853  | 6.063789  | 0.408362  |
| C  | 1.694394  | 3.879038  | -1.271568 |
| H  | 1.525747  | 2.797575  | -1.327861 |
| H  | 1.966569  | 4.246956  | -2.271313 |
| H  | 2.552083  | 4.054299  | -0.609294 |
| Na | -4.164515 | -2.084585 | 4.168242  |
| H  | -0.628039 | 3.224445  | 3.130149  |
| H  | -3.296469 | 3.511574  | 1.559499  |
| H  | -1.346906 | 1.324939  | 2.982086  |

139

Figure\_S4\_imid-3\_modeR2\_prod(CuHadd) / electronic energy: -3372.935174585896 a.u. / lowest freq: 12.93 cm-1

|    |           |           |           |
|----|-----------|-----------|-----------|
| C  | 2.173987  | -2.141745 | 1.320699  |
| H  | 2.678648  | -3.112068 | 1.215956  |
| C  | 0.637269  | -2.241499 | 1.218571  |
| H  | 0.134443  | -1.942558 | 2.151517  |
| C  | 1.431024  | -0.716607 | -0.411046 |
| C  | 3.837158  | -0.931298 | -0.193396 |
| C  | 4.187981  | 0.412916  | -0.027807 |
| C  | 4.796033  | -1.838769 | -0.676607 |
| C  | 5.478452  | 0.857504  | -0.299133 |
| H  | 3.426190  | 1.116870  | 0.312361  |
| C  | 6.096181  | -1.388963 | -0.918009 |
| C  | 6.443934  | -0.053608 | -0.721930 |
| H  | 5.715673  | 1.916528  | -0.175737 |
| H  | 6.824202  | -2.109446 | -1.294370 |
| H  | 7.466296  | 0.275947  | -0.920195 |
| C  | -0.946531 | -0.659993 | 0.030788  |
| C  | -2.064869 | -1.465462 | -0.231080 |
| C  | -1.129096 | 0.712525  | 0.271285  |
| C  | -3.351884 | -0.915974 | -0.219485 |
| C  | -2.421326 | 1.258688  | 0.311217  |
| C  | -3.529706 | 0.440519  | 0.065738  |
| H  | -4.530371 | 0.853617  | 0.116731  |
| S  | 4.383575  | -3.518314 | -1.213660 |
| O  | 5.637415  | -4.072106 | -1.757407 |
| O  | 3.351936  | -3.274877 | -2.273370 |
| O  | 3.848353  | -4.250675 | -0.048825 |
| Cu | 1.714200  | 0.733330  | -1.659907 |
| C  | 2.641298  | -1.449570 | 2.581695  |
| C  | 3.557401  | -2.085604 | 3.437250  |
| C  | 2.192496  | -0.153591 | 2.904047  |
| C  | 4.014884  | -1.438511 | 4.589360  |
| H  | 3.923012  | -3.079514 | 3.211333  |
| C  | 2.654673  | 0.489864  | 4.054770  |
| H  | 1.488151  | 0.360017  | 2.263981  |
| C  | 3.564993  | -0.152030 | 4.897177  |
| H  | 4.721554  | -1.933935 | 5.242499  |
| H  | 2.308343  | 1.487508  | 4.292018  |
| H  | 3.922577  | 0.347621  | 5.788137  |
| C  | 0.173421  | -3.626340 | 0.838392  |
| C  | -0.572654 | -4.396338 | 1.748338  |
| C  | 0.470253  | -4.163906 | -0.426838 |
| C  | -1.009321 | -5.677633 | 1.398423  |

|   |           |           |           |
|---|-----------|-----------|-----------|
| H | -0.818001 | -4.006939 | 2.728584  |
| C | 0.030198  | -5.444195 | -0.773346 |
| H | 1.028355  | -3.585892 | -1.148572 |
| C | -0.709084 | -6.200805 | 0.138619  |
| H | -1.584121 | -6.263736 | 2.103792  |
| H | 0.259666  | -5.848309 | -1.750760 |
| H | -1.050534 | -7.191689 | -0.131350 |
| N | 2.505807  | -1.318229 | 0.132408  |
| N | 0.335585  | -1.247067 | 0.159237  |
| H | -0.276721 | 1.339566  | 0.496614  |
| H | -1.942637 | -2.521320 | -0.431199 |
| C | -2.631356 | 2.665950  | 0.712216  |
| C | -2.494104 | 3.039483  | 2.080981  |
| C | -3.040117 | 3.632443  | -0.251591 |
| C | -2.735423 | 4.376191  | 2.447429  |
| C | -3.307427 | 4.946156  | 0.175418  |
| C | -3.144268 | 5.313229  | 1.506045  |
| H | -2.625469 | 4.696499  | 3.475024  |
| H | -3.639276 | 5.699601  | -0.526357 |
| H | -3.340718 | 6.332944  | 1.811394  |
| C | -4.527016 | -1.774962 | -0.456121 |
| C | -5.065601 | -1.896147 | -1.767179 |
| C | -5.136437 | -2.458125 | 0.633224  |
| C | -6.201926 | -2.702545 | -1.961866 |
| C | -6.278212 | -3.242722 | 0.388407  |
| C | -6.799920 | -3.364449 | -0.894943 |
| H | -6.635787 | -2.818000 | -2.946401 |
| H | -6.772353 | -3.766801 | 1.195866  |
| H | -7.677210 | -3.975691 | -1.063905 |
| C | -4.596952 | -2.357734 | 2.060641  |
| H | -3.669178 | -1.751610 | 2.097745  |
| C | -4.218613 | -3.738699 | 2.610511  |
| H | -3.542863 | -4.256696 | 1.898346  |
| H | -3.685846 | -3.629251 | 3.579300  |
| H | -5.117018 | -4.369985 | 2.774369  |
| C | -5.601639 | -1.652994 | 2.979002  |
| H | -5.847894 | -0.649474 | 2.570126  |
| H | -6.538185 | -2.241439 | 3.077885  |
| H | -5.161701 | -1.515794 | 3.990021  |
| C | -4.452384 | -1.175381 | -2.967934 |
| H | -3.571947 | -0.571897 | -2.667092 |
| C | -5.449488 | -0.189364 | -3.588635 |
| H | -4.947899 | 0.413687  | -4.375501 |
| H | -6.309994 | -0.720017 | -4.047671 |
| H | -5.830463 | 0.504700  | -2.809705 |
| C | -3.942487 | -2.176479 | -4.011474 |
| H | -3.417057 | -1.638342 | -4.829230 |
| H | -3.222442 | -2.879900 | -3.540822 |
| H | -4.777414 | -2.759006 | -4.454637 |
| C | -3.217307 | 3.286643  | -1.730507 |
| H | -2.874261 | 2.252999  | -1.940562 |
| C | -2.124804 | 2.032387  | 3.172638  |
| H | -2.014423 | 1.010418  | 2.760279  |
| C | -0.776985 | 2.383305  | 3.813028  |
| H | 0.008844  | 2.436695  | 3.031415  |
| H | -0.822940 | 3.357452  | 4.343581  |
| H | -0.484915 | 1.597120  | 4.541673  |
| C | -3.230396 | 1.926808  | 4.230896  |
| H | -3.338821 | 2.873278  | 4.800813  |
| H | -4.199368 | 1.685002  | 3.743460  |
| H | -2.992548 | 1.112330  | 4.948288  |
| C | -2.371977 | 4.197670  | -2.630887 |
| H | -2.754112 | 5.239818  | -2.631187 |
| H | -1.319849 | 4.205191  | -2.284223 |
| H | -2.390838 | 3.820695  | -3.675834 |
| C | -4.696034 | 3.350688  | -2.129250 |
| H | -5.295542 | 2.679166  | -1.478965 |
| H | -5.091545 | 4.384273  | -2.035360 |
| H | -4.821414 | 3.017927  | -3.181763 |
| C | 2.151276  | 2.231779  | -2.857986 |
| C | 1.161606  | 2.472781  | -3.987446 |
| H | 1.384656  | 3.378949  | -4.583338 |
| B | 2.156577  | 3.220126  | -1.698912 |
| O | 3.247532  | 3.490009  | -0.863285 |
| O | 1.048385  | 3.963836  | -1.300690 |
| C | 2.770726  | 4.271853  | 0.249052  |
| C | 1.484284  | 4.938522  | -0.342020 |
| C | 2.449445  | 3.316625  | 1.388783  |
| H | 3.356292  | 2.776367  | 1.694577  |
| H | 2.065631  | 3.840044  | 2.275446  |
| H | 1.698761  | 2.576869  | 1.073622  |
| C | 3.849939  | 5.246365  | 0.671275  |
| H | 3.484568  | 5.924297  | 1.456870  |
| H | 4.715051  | 4.703629  | 1.077184  |
| H | 4.202941  | 5.854399  | -0.170369 |
| C | 1.788006  | 6.221794  | -1.101970 |
| H | 2.061505  | 7.046308  | -0.428687 |
| H | 2.606483  | 6.079120  | -1.821671 |

|    |           |           |           |
|----|-----------|-----------|-----------|
| H  | 0.896264  | 6.527160  | -1.666165 |
| C  | 0.376167  | 5.174679  | 0.660564  |
| H  | 0.012840  | 4.233673  | 1.088951  |
| H  | 0.711437  | 5.823755  | 1.482465  |
| H  | -0.472422 | 5.669689  | 0.170550  |
| Na | 2.769586  | -1.683965 | -3.674549 |
| H  | 0.136855  | 2.610495  | -3.609808 |
| H  | 3.178156  | 2.038580  | -3.219316 |
| H  | 1.106243  | 1.643564  | -4.712428 |

165

Figure\_S5\_imid-3\_modeS1\_ed(CuHadd) / electronic energy: -3525.649267433137 a.u. / lowest freq: 7.11 cm<sup>-1</sup>

|    |           |           |           |
|----|-----------|-----------|-----------|
| C  | 0.412352  | 3.294450  | 0.389998  |
| H  | 1.144496  | 3.134611  | 1.195081  |
| C  | -0.967154 | 2.677321  | 0.700485  |
| H  | -1.791609 | 3.360722  | 0.437461  |
| C  | 0.039224  | 1.460491  | -1.063838 |
| C  | 2.013664  | 2.766584  | -1.538968 |
| C  | 1.863467  | 3.044694  | -2.903583 |
| C  | 3.303759  | 2.726059  | -0.985502 |
| C  | 2.971137  | 3.291276  | -3.708836 |
| H  | 0.852552  | 3.058913  | -3.320761 |
| C  | 4.407977  | 2.999116  | -1.796353 |
| C  | 4.248387  | 3.285029  | -3.149464 |
| H  | 2.832742  | 3.499140  | -4.772095 |
| H  | 5.401609  | 2.949506  | -1.347865 |
| H  | 5.123823  | 3.491305  | -3.768826 |
| C  | -2.072789 | 0.598946  | -0.259745 |
| C  | -3.398756 | 1.064473  | -0.235319 |
| C  | -1.830485 | -0.782686 | -0.238029 |
| C  | -4.465563 | 0.158950  | -0.181279 |
| C  | -2.900245 | -1.685961 | -0.161822 |
| C  | -4.214834 | -1.214283 | -0.139503 |
| H  | -5.040433 | -1.913954 | -0.072955 |
| S  | 3.620828  | 2.185074  | 0.701525  |
| O  | 5.025894  | 1.684565  | 0.669100  |
| O  | 2.664887  | 1.055999  | 0.909405  |
| O  | 3.410007  | 3.340832  | 1.590161  |
| Cu | 0.400649  | 0.410241  | -2.702562 |
| C  | 0.333686  | 4.765678  | 0.064666  |
| C  | 0.966683  | 5.710087  | 0.891559  |
| C  | -0.371329 | 5.213533  | -1.068877 |
| C  | 0.901370  | 7.072956  | 0.586281  |
| H  | 1.506399  | 5.395245  | 1.775292  |
| C  | -0.432923 | 6.576837  | -1.370205 |
| H  | -0.869530 | 4.506011  | -1.720022 |
| C  | 0.203577  | 7.505873  | -0.543907 |
| H  | 1.391345  | 7.794258  | 1.227428  |
| H  | -0.974475 | 6.913026  | -2.244905 |
| H  | 0.154620  | 8.561360  | -0.778324 |
| C  | -1.111355 | 2.264629  | 2.144147  |
| C  | -2.011360 | 2.940019  | 2.986689  |
| C  | -0.359252 | 1.195580  | 2.665336  |
| C  | -2.149401 | 2.557162  | 4.324292  |
| H  | -2.603190 | 3.765612  | 2.611646  |
| C  | -0.503219 | 0.814713  | 4.001922  |
| H  | 0.328181  | 0.650744  | 2.033780  |
| C  | -1.398551 | 1.493788  | 4.830622  |
| H  | -2.839669 | 3.085511  | 4.968944  |
| H  | 0.079429  | -0.006964 | 4.395988  |
| H  | -1.509180 | 1.197291  | 5.865560  |
| N  | 0.840628  | 2.507381  | -0.787396 |
| N  | -0.990117 | 1.510473  | -0.206108 |
| H  | -0.812046 | -1.149387 | -0.227595 |
| H  | -3.607297 | 2.126171  | -0.253984 |
| C  | -2.647803 | -3.130665 | -0.031451 |
| C  | -2.640073 | -3.959236 | -1.187480 |
| C  | -2.409857 | -3.691865 | 1.254918  |
| C  | -2.364733 | -5.330477 | -1.035728 |
| C  | -2.133512 | -5.067964 | 1.352113  |
| C  | -2.107018 | -5.873440 | 0.218563  |
| H  | -2.346431 | -5.988988 | -1.894026 |
| H  | -1.938416 | -5.526324 | 2.312573  |
| H  | -1.892052 | -6.930005 | 0.313849  |
| C  | -5.856566 | 0.644134  | -0.136563 |
| C  | -6.460440 | 0.949278  | 1.115077  |
| C  | -6.612762 | 0.737220  | -1.337956 |
| C  | -7.812336 | 1.338752  | 1.137781  |
| C  | -7.960560 | 1.133077  | -1.261849 |
| C  | -8.549663 | 1.431154  | -0.037842 |
| H  | -8.307609 | 1.564048  | 2.072978  |
| H  | -8.567259 | 1.204306  | -2.154945 |
| H  | -9.589574 | 1.729326  | 0.000816  |
| C  | -6.012763 | 0.400102  | -2.703597 |
| H  | -4.936244 | 0.148096  | -2.617351 |
| C  | -6.085348 | 1.599197  | -3.657355 |
| H  | -5.604740 | 2.485108  | -3.189689 |
| H  | -5.543149 | 1.367885  | -4.599125 |
| H  | -7.135750 | 1.851618  | -3.912984 |

|    |           |           |           |
|----|-----------|-----------|-----------|
| C  | -6.692045 | -0.832720 | -3.311155 |
| H  | -6.620879 | -1.689237 | -2.606868 |
| H  | -7.762530 | -0.635077 | -3.530522 |
| H  | -6.184322 | -1.120251 | -4.256667 |
| C  | -5.697007 | 0.836067  | 2.435865  |
| H  | -4.635340 | 0.564185  | 2.265655  |
| C  | -6.283854 | -0.275119 | 3.313743  |
| H  | -5.663396 | -0.407322 | 4.225996  |
| H  | -7.322882 | -0.035954 | 3.624147  |
| H  | -6.286061 | -1.236189 | 2.755932  |
| C  | -5.671239 | 2.175205  | 3.182949  |
| H  | -5.047906 | 2.086214  | 4.097276  |
| H  | -5.229696 | 2.962107  | 2.534755  |
| H  | -6.690185 | 2.489982  | 3.490256  |
| C  | -2.451725 | -2.849460 | 2.531926  |
| H  | -2.702805 | -1.792145 | 2.310518  |
| C  | -2.927836 | -3.408308 | -2.584481 |
| H  | -3.121859 | -2.316913 | -2.553336 |
| C  | -1.724185 | -3.595405 | -3.515120 |
| H  | -0.832987 | -3.100979 | -3.077948 |
| H  | -1.498279 | -4.670091 | -3.677491 |
| H  | -1.928289 | -3.125967 | -4.501041 |
| C  | -4.190038 | -4.045108 | -3.178029 |
| H  | -4.046774 | -5.131122 | -3.359545 |
| H  | -5.046648 | -3.905392 | -2.484255 |
| H  | -4.444382 | -3.557160 | -4.143282 |
| C  | -1.084619 | -2.822432 | 3.225024  |
| H  | -0.755881 | -3.841629 | 3.516910  |
| H  | -0.326805 | -2.378033 | 2.546417  |
| H  | -1.134764 | -2.196591 | 4.140893  |
| C  | -3.545425 | -3.345447 | 3.485566  |
| H  | -4.523371 | -3.373165 | 2.958791  |
| H  | -3.314498 | -4.360143 | 3.872498  |
| H  | -3.638886 | -2.652919 | 4.349506  |
| C  | 2.270724  | -0.488001 | -2.842663 |
| C  | 1.516068  | -0.530238 | -4.037682 |
| H  | 1.015109  | -1.457202 | -4.337335 |
| B  | 2.397138  | -1.734525 | -1.964808 |
| O  | 1.553826  | -2.814638 | -2.059899 |
| O  | 3.431088  | -1.979258 | -1.057584 |
| C  | 1.932496  | -3.765398 | -1.039130 |
| C  | 3.433586  | -3.420856 | -0.819279 |
| C  | 1.095731  | -3.465310 | 0.189789  |
| H  | 0.041262  | -3.507521 | -0.093396 |
| H  | 1.260898  | -4.192428 | 0.995993  |
| H  | 1.298001  | -2.456842 | 0.578657  |
| C  | 1.663570  | -5.162549 | -1.548464 |
| H  | 2.022163  | -5.917647 | -0.834628 |
| H  | 0.584001  | -5.313073 | -1.679208 |
| H  | 2.144145  | -5.343672 | -2.517444 |
| C  | 4.337622  | -4.048662 | -1.865200 |
| H  | 4.412640  | -5.135512 | -1.727452 |
| H  | 3.972757  | -3.855933 | -2.883516 |
| H  | 5.350983  | -3.635257 | -1.783165 |
| C  | 3.947515  | -3.707254 | 0.572302  |
| H  | 3.384838  | -3.169319 | 1.343822  |
| H  | 3.872046  | -4.781825 | 0.791358  |
| H  | 5.006130  | -3.426910 | 0.659868  |
| Na | 4.291372  | -0.596233 | 0.566307  |
| H  | 1.718176  | 0.165978  | -4.858979 |
| H  | 3.013529  | 0.313947  | -2.736389 |
| H  | -0.822217 | 0.691844  | -3.674542 |
| O  | 6.467374  | -1.332810 | 0.168822  |
| O  | 4.100602  | -1.087567 | 2.810304  |
| C  | 6.860083  | -1.150202 | -1.149726 |
| H  | 7.494003  | -2.008022 | -1.466710 |
| H  | 5.964942  | -1.110006 | -1.805682 |
| C  | 7.432687  | -0.723945 | 0.961657  |
| H  | 6.946423  | -0.276827 | 1.854392  |
| H  | 8.159328  | -1.491797 | 1.307333  |
| C  | 8.141765  | 0.350656  | 0.154329  |
| H  | 7.876578  | 1.366401  | 0.521414  |
| H  | 9.244379  | 0.214193  | 0.204493  |
| C  | 7.638639  | 0.142888  | -1.245364 |
| H  | 8.472647  | 0.059940  | -1.975913 |
| H  | 6.962737  | 0.974936  | -1.540489 |
| C  | 4.819716  | -1.887107 | 3.685902  |
| H  | 5.516909  | -2.536526 | 3.115369  |
| H  | 5.414639  | -1.239715 | 4.367543  |
| C  | 2.834771  | -0.896700 | 3.356736  |
| H  | 2.736909  | 0.153399  | 3.707734  |
| H  | 2.074021  | -1.076403 | 2.568488  |
| C  | 2.618847  | -1.866044 | 4.507100  |
| H  | 2.557483  | -1.312183 | 5.469881  |
| H  | 1.698247  | -2.472968 | 4.366148  |
| C  | 3.845172  | -2.725361 | 4.478392  |
| H  | 4.225073  | -2.944119 | 5.499925  |
| H  | 3.634321  | -3.674937 | 3.938200  |

165

Figure\_S5\_imid-3\_modeS1\_ts(CuHadd)\_01 / electronic energy: -3525.636749203804 a.u. / lowest freq: -746.07 cm-1

|    |           |           |           |
|----|-----------|-----------|-----------|
| C  | 0.329402  | 3.358227  | 0.292017  |
| H  | 1.047647  | 3.226651  | 1.115305  |
| C  | -1.045318 | 2.725779  | 0.592883  |
| H  | -1.874406 | 3.388373  | 0.293176  |
| C  | 0.022810  | 1.468829  | -1.105391 |
| C  | 1.976518  | 2.798172  | -1.592298 |
| C  | 1.850746  | 3.029953  | -2.968230 |
| C  | 3.255895  | 2.786133  | -1.013877 |
| C  | 2.971461  | 3.258327  | -3.760330 |
| H  | 0.848060  | 3.023875  | -3.403735 |
| C  | 4.373739  | 3.038577  | -1.812949 |
| C  | 4.238197  | 3.278001  | -3.177320 |
| H  | 2.852024  | 3.432083  | -4.831983 |
| H  | 5.359076  | 3.008332  | -1.344436 |
| H  | 5.123920  | 3.468387  | -3.787155 |
| C  | -2.095293 | 0.591868  | -0.312260 |
| C  | -3.431257 | 1.026761  | -0.251808 |
| C  | -1.823733 | -0.785553 | -0.313741 |
| C  | -4.476834 | 0.098215  | -0.186513 |
| C  | -2.873333 | -1.712052 | -0.229281 |
| C  | -4.196689 | -1.269304 | -0.173178 |
| H  | -5.005778 | -1.987296 | -0.099252 |
| S  | 3.544268  | 2.321790  | 0.701019  |
| O  | 4.937021  | 1.788705  | 0.702430  |
| O  | 2.558918  | 1.231073  | 0.960459  |
| O  | 3.352786  | 3.529557  | 1.523347  |
| Cu | 0.661359  | 0.315555  | -2.503662 |
| C  | 0.233305  | 4.820399  | -0.067076 |
| C  | 0.832919  | 5.792619  | 0.752206  |
| C  | -0.454747 | 5.231958  | -1.224519 |
| C  | 0.751565  | 7.147421  | 0.416498  |
| H  | 1.358625  | 5.505202  | 1.653531  |
| C  | -0.532534 | 6.587375  | -1.556301 |
| H  | -0.927201 | 4.502315  | -1.870473 |
| C  | 0.070802  | 7.544405  | -0.737040 |
| H  | 1.215815  | 7.890305  | 1.052123  |
| H  | -1.060906 | 6.895739  | -2.449122 |
| H  | 0.009335  | 8.593719  | -0.995037 |
| C  | -1.211966 | 2.357103  | 2.046496  |
| C  | -2.098563 | 3.081870  | 2.861556  |
| C  | -0.499143 | 1.278470  | 2.603231  |
| C  | -2.263506 | 2.737234  | 4.206379  |
| H  | -2.660096 | 3.915576  | 2.458801  |
| C  | -0.673451 | 0.932968  | 3.945859  |
| H  | 0.178580  | 0.696369  | 1.994335  |
| C  | -1.555230 | 1.661402  | 4.746931  |
| H  | -2.945332 | 3.302110  | 4.828764  |
| H  | -0.125182 | 0.100156  | 4.365652  |
| H  | -1.689190 | 1.392828  | 5.786717  |
| N  | 0.789010  | 2.554107  | -0.856795 |
| N  | -1.032865 | 1.529680  | -0.275880 |
| H  | -0.798248 | -1.133069 | -0.329893 |
| H  | -3.665649 | 2.082943  | -0.250926 |
| C  | -2.589789 | -3.152997 | -0.128420 |
| C  | -2.538725 | -3.951709 | -1.303854 |
| C  | -2.355298 | -3.738095 | 1.147583  |
| C  | -2.225824 | -5.317868 | -1.181009 |
| C  | -2.041564 | -5.107871 | 1.216478  |
| C  | -1.975179 | -5.884602 | 0.064398  |
| H  | -2.167515 | -5.952430 | -2.055423 |
| H  | -1.843727 | -5.582494 | 2.168434  |
| H  | -1.729209 | -6.936147 | 0.137521  |
| C  | -5.875473 | 0.553774  | -0.095935 |
| C  | -6.464958 | 0.779978  | 1.179126  |
| C  | -6.650969 | 0.699552  | -1.279441 |
| C  | -7.822537 | 1.144137  | 1.242613  |
| C  | -8.003502 | 1.068521  | -1.162504 |
| C  | -8.578827 | 1.288821  | 0.084392  |
| H  | -8.307091 | 1.309262  | 2.195812  |
| H  | -8.624626 | 1.178693  | -2.041618 |
| H  | -9.622652 | 1.566980  | 0.154191  |
| C  | -6.066695 | 0.445607  | -2.669621 |
| H  | -4.985671 | 0.204826  | -2.612396 |
| C  | -6.170492 | 1.693484  | -3.555517 |
| H  | -5.695149 | 2.559681  | -3.047239 |
| H  | -5.639578 | 1.521744  | -4.516278 |
| H  | -7.228128 | 1.943872  | -3.781636 |
| C  | -6.737123 | -0.762740 | -3.333642 |
| H  | -6.638032 | -1.656381 | -2.680497 |
| H  | -7.814667 | -0.571842 | -3.522264 |
| H  | -6.242892 | -0.987554 | -4.302997 |
| C  | -5.678929 | 0.609162  | 2.480422  |
| H  | -4.614739 | 0.369486  | 2.279612  |
| C  | -6.230907 | -0.560743 | 3.302741  |
| H  | -5.593701 | -0.731952 | 4.196738  |
| H  | -7.269116 | -0.359453 | 3.641499  |

|    |           |           |           |
|----|-----------|-----------|-----------|
| H  | -6.224677 | -1.488626 | 2.691490  |
| C  | -5.667052 | 1.904245  | 3.301776  |
| H  | -5.024962 | 1.776747  | 4.198758  |
| H  | -5.253877 | 2.735979  | 2.691971  |
| H  | -6.686398 | 2.179098  | 3.644053  |
| C  | -2.429176 | -2.924938 | 2.441823  |
| H  | -2.721395 | -1.873963 | 2.242144  |
| C  | -2.801348 | -3.369632 | -2.692867 |
| H  | -3.052423 | -2.290950 | -2.635310 |
| C  | -1.552039 | -3.466310 | -3.575329 |
| H  | -0.707415 | -2.940429 | -3.084271 |
| H  | -1.263698 | -4.523115 | -3.756138 |
| H  | -1.738260 | -2.978064 | -4.555658 |
| C  | -4.005871 | -4.045354 | -3.359186 |
| H  | -3.802121 | -5.115587 | -3.573030 |
| H  | -4.895214 | -3.971973 | -2.697019 |
| H  | -4.245766 | -3.535429 | -4.316756 |
| C  | -1.062603 | -2.859068 | 3.132366  |
| H  | -0.700887 | -3.870148 | 3.413947  |
| H  | -0.321359 | -2.385322 | 2.455271  |
| H  | -1.130536 | -2.241236 | 4.052801  |
| C  | -3.500833 | -3.481545 | 3.387102  |
| H  | -4.476917 | -3.541946 | 2.859795  |
| H  | -3.227831 | -4.491563 | 3.758370  |
| H  | -3.622328 | -2.807523 | 4.262073  |
| C  | 2.473054  | -0.648534 | -2.830061 |
| C  | 1.617484  | -0.607170 | -3.999789 |
| H  | 1.171544  | -1.552265 | -4.329269 |
| B  | 2.577926  | -1.885887 | -1.978573 |
| O  | 1.778087  | -3.009515 | -2.125535 |
| O  | 3.532773  | -2.098744 | -0.965404 |
| C  | 2.059443  | -3.891660 | -1.023604 |
| C  | 3.530814  | -3.522285 | -0.680371 |
| C  | 1.111504  | -3.522746 | 0.103883  |
| H  | 0.090906  | -3.560681 | -0.284952 |
| H  | 1.180279  | -4.210956 | 0.957326  |
| H  | 1.291904  | -2.498456 | 0.462138  |
| C  | 1.841409  | -5.320616 | -1.465864 |
| H  | 2.136239  | -6.028617 | -0.677842 |
| H  | 0.778269  | -5.489209 | -1.684290 |
| H  | 2.408052  | -5.557036 | -2.374891 |
| C  | 4.533237  | -4.180257 | -1.613480 |
| H  | 4.610833  | -5.259818 | -1.425185 |
| H  | 4.259012  | -4.034346 | -2.667568 |
| H  | 5.528842  | -3.744363 | -1.455849 |
| C  | 3.916806  | -3.755998 | 0.762285  |
| H  | 3.289818  | -3.183286 | 1.455583  |
| H  | 3.819955  | -4.821068 | 1.017984  |
| H  | 4.963343  | -3.466897 | 0.930224  |
| Na | 4.149671  | -0.497896 | 0.552636  |
| H  | 1.923179  | 0.017393  | -4.846579 |
| H  | 3.234324  | 0.138694  | -2.743070 |
| H  | 0.114357  | 0.171461  | -3.989161 |
| O  | 6.373836  | -1.233599 | 0.382397  |
| O  | 3.951547  | -0.982789 | 2.798269  |
| C  | 6.859605  | -1.115855 | -0.912350 |
| H  | 7.520823  | -1.982133 | -1.137252 |
| H  | 6.015565  | -1.117554 | -1.633814 |
| C  | 7.270534  | -0.569424 | 1.212337  |
| H  | 6.706773  | -0.031807 | 2.003873  |
| H  | 7.934347  | -1.314058 | 1.703569  |
| C  | 8.091779  | 0.413435  | 0.392552  |
| H  | 7.896040  | 1.463074  | 0.703454  |
| H  | 9.177072  | 0.192185  | 0.494691  |
| C  | 7.634496  | 0.176861  | -1.016669 |
| H  | 8.489700  | 0.084338  | -1.720982 |
| H  | 6.961034  | 0.998193  | -1.346285 |
| C  | 4.686105  | -1.709504 | 3.723194  |
| H  | 5.405727  | -2.371518 | 3.197281  |
| H  | 5.257954  | -1.006877 | 4.368965  |
| C  | 2.679071  | -0.791795 | 3.328697  |
| H  | 2.555587  | 0.273480  | 3.620786  |
| H  | 1.926749  | -1.032795 | 2.548284  |
| C  | 2.481021  | -1.699279 | 4.531658  |
| H  | 2.398963  | -1.093200 | 5.460886  |
| H  | 1.577838  | -2.337441 | 4.421531  |
| C  | 3.729347  | -2.526238 | 4.558356  |
| H  | 4.108737  | -2.675475 | 5.592543  |
| H  | 3.546682  | -3.510655 | 4.073015  |

165

Figure\_S5\_imid-3\_modeS1\_ts(CuHadd)\_02 / electronic energy: -3525.633841086988 a.u. / lowest freq: -772.94 cm<sup>-1</sup>

|   |           |          |           |
|---|-----------|----------|-----------|
| C | 0.148808  | 3.382703 | 0.334870  |
| H | 0.949640  | 3.239316 | 1.076543  |
| C | -1.163391 | 2.668386 | 0.724609  |
| H | -2.048503 | 3.287128 | 0.499409  |
| C | -0.182357 | 1.530937 | -1.102220 |
| C | 1.594248  | 3.014904 | -1.763885 |
| C | 1.270763  | 3.273668 | -3.102550 |



|    |           |           |           |
|----|-----------|-----------|-----------|
| C  | 2.936024  | 3.084811  | -1.357732 |
| C  | 2.255531  | 3.613899  | -4.024056 |
| H  | 0.222679  | 3.201269  | -3.403033 |
| C  | 3.916627  | 3.445293  | -2.285670 |
| C  | 3.583005  | 3.715651  | -3.610328 |
| H  | 1.982477  | 3.809744  | -5.063242 |
| H  | 4.956151  | 3.473454  | -1.954161 |
| H  | 4.364177  | 3.991158  | -4.322110 |
| C  | -2.161461 | 0.507635  | -0.168412 |
| C  | -3.514285 | 0.882514  | -0.110041 |
| C  | -1.824389 | -0.853721 | -0.153272 |
| C  | -4.515331 | -0.092836 | -0.028864 |
| C  | -2.828147 | -1.827374 | -0.050612 |
| C  | -4.171031 | -1.445984 | 0.007427  |
| H  | -4.945465 | -2.200046 | 0.092011  |
| S  | 3.470785  | 2.593442  | 0.287452  |
| O  | 4.895999  | 2.189223  | 0.102872  |
| O  | 2.622942  | 1.410476  | 0.614987  |
| O  | 3.278530  | 3.752478  | 1.176583  |
| Cu | 0.384140  | 0.418430  | -2.556794 |
| C  | -0.044089 | 4.856039  | 0.075404  |
| C  | 0.579158  | 5.808568  | 0.900190  |
| C  | -0.850055 | 5.298365  | -0.990986 |
| C  | 0.406958  | 7.174606  | 0.657210  |
| H  | 1.193352  | 5.497107  | 1.735167  |
| C  | -1.018315 | 6.664995  | -1.230397 |
| H  | -1.344482 | 4.584393  | -1.637957 |
| C  | -0.389499 | 7.602497  | -0.407750 |
| H  | 0.890335  | 7.902124  | 1.296351  |
| H  | -1.636781 | 6.997213  | -2.054115 |
| H  | -0.521164 | 8.660493  | -0.594043 |
| C  | -1.201163 | 2.259076  | 2.175461  |
| C  | -2.132033 | 2.840481  | 3.053649  |
| C  | -0.326062 | 1.271446  | 2.663697  |
| C  | -2.180200 | 2.444884  | 4.393984  |
| H  | -2.819790 | 3.599986  | 2.703513  |
| C  | -0.379172 | 0.877685  | 4.003068  |
| H  | 0.386493  | 0.799407  | 2.002120  |
| C  | -1.306653 | 1.462859  | 4.867609  |
| H  | -2.896408 | 2.899457  | 5.065989  |
| H  | 0.297454  | 0.117447  | 4.370340  |
| H  | -1.348034 | 1.156046  | 5.904626  |
| N  | 0.528957  | 2.661456  | -0.897073 |
| N  | -1.143612 | 1.490930  | -0.165298 |
| H  | -0.782950 | -1.150455 | -0.174530 |
| H  | -3.794722 | 1.927545  | -0.128485 |
| C  | -2.473905 | -3.251928 | 0.061350  |
| C  | -2.465608 | -4.076509 | -1.097599 |
| C  | -2.127459 | -3.794592 | 1.330604  |
| C  | -2.081060 | -5.423474 | -0.967077 |
| C  | -1.742804 | -5.145800 | 1.406549  |
| C  | -1.717601 | -5.946626 | 0.269484  |
| H  | -2.055338 | -6.076997 | -1.829012 |
| H  | -1.458598 | -5.587423 | 2.352488  |
| H  | -1.417513 | -6.983636 | 0.347923  |
| C  | -5.934269 | 0.298958  | 0.041179  |
| C  | -6.528856 | 0.585146  | 1.301534  |
| C  | -6.719104 | 0.331592  | -1.144978 |
| C  | -7.900654 | 0.894520  | 1.348559  |
| C  | -8.086415 | 0.646862  | -1.044644 |
| C  | -8.666713 | 0.925930  | 0.188091  |
| H  | -8.388116 | 1.105528  | 2.291186  |
| H  | -8.714265 | 0.671432  | -1.925564 |
| H  | -9.721356 | 1.163129  | 0.245332  |
| C  | -6.126845 | 0.019460  | -2.520070 |
| H  | -5.036257 | -0.170274 | -2.453481 |
| C  | -6.285986 | 1.206091  | -3.478913 |
| H  | -5.846373 | 2.120669  | -3.026275 |
| H  | -5.750942 | 0.999243  | -4.430446 |
| H  | -7.353944 | 1.397612  | -3.713907 |
| C  | -6.745661 | -1.254137 | -3.107724 |
| H  | -6.612977 | -2.100344 | -2.399935 |
| H  | -7.829405 | -1.119282 | -3.308686 |
| H  | -6.239549 | -1.518650 | -4.060804 |
| C  | -5.731300 | 0.540488  | 2.606142  |
| H  | -4.660622 | 0.321737  | 2.416880  |
| C  | -6.237034 | -0.581629 | 3.519939  |
| H  | -5.591155 | -0.659073 | 4.420754  |
| H  | -7.280889 | -0.393420 | 3.848604  |
| H  | -6.197312 | -1.553557 | 2.982593  |
| C  | -5.761405 | 1.895061  | 3.324607  |
| H  | -5.108870 | 1.862059  | 4.222298  |
| H  | -5.383163 | 2.691034  | 2.648046  |
| H  | -6.788335 | 2.158432  | 3.653247  |
| C  | -2.159724 | -2.956251 | 2.610498  |
| H  | -2.522013 | -1.927406 | 2.410034  |
| C  | -2.855958 | -3.544277 | -2.477019 |
| H  | -3.142519 | -2.474165 | -2.428445 |

|    |           |           |           |
|----|-----------|-----------|-----------|
| C  | -1.677339 | -3.620324 | -3.453851 |
| H  | -0.818406 | -3.048715 | -3.047039 |
| H  | -1.362286 | -4.670202 | -3.629993 |
| H  | -1.959815 | -3.168332 | -4.428590 |
| C  | -4.080911 | -4.283510 | -3.028578 |
| H  | -3.851391 | -5.350841 | -3.230725 |
| H  | -4.917688 | -4.226050 | -2.299838 |
| H  | -4.415459 | -3.810194 | -3.976511 |
| C  | -0.755786 | -2.802772 | 3.205999  |
| H  | -0.317452 | -3.787746 | 3.470717  |
| H  | -0.091623 | -2.295133 | 2.475337  |
| H  | -0.796693 | -2.179092 | 4.123889  |
| C  | -3.135941 | -3.545034 | 3.636375  |
| H  | -4.140977 | -3.664656 | 3.177721  |
| H  | -2.787523 | -4.531815 | 4.006957  |
| H  | -3.233180 | -2.858953 | 4.505022  |
| C  | 2.198097  | -0.485255 | -3.002743 |
| C  | 1.251906  | -0.508105 | -4.102625 |
| H  | 0.818629  | -1.479054 | -4.367641 |
| B  | 2.430585  | -1.702920 | -2.146615 |
| O  | 1.666310  | -2.857047 | -2.201742 |
| O  | 3.501422  | -1.870651 | -1.242030 |
| C  | 2.120857  | -3.737972 | -1.158664 |
| C  | 3.602066  | -3.296941 | -0.986708 |
| C  | 1.293926  | -3.440236 | 0.079900  |
| H  | 0.237127  | -3.532024 | -0.184626 |
| H  | 1.501471  | -4.134392 | 0.905618  |
| H  | 1.460125  | -2.412835 | 0.434367  |
| C  | 1.927912  | -5.170118 | -1.603664 |
| H  | 2.344117  | -5.873286 | -0.867884 |
| H  | 0.857092  | -5.390904 | -1.706995 |
| H  | 2.401716  | -5.362227 | -2.574247 |
| C  | 4.511499  | -3.884422 | -2.053271 |
| H  | 4.698291  | -4.953826 | -1.884491 |
| H  | 4.080735  | -3.764880 | -3.057183 |
| H  | 5.480153  | -3.367197 | -2.042152 |
| C  | 4.162020  | -3.544166 | 0.394817  |
| H  | 3.591076  | -3.019569 | 1.167196  |
| H  | 4.144861  | -4.619283 | 0.624716  |
| H  | 5.205293  | -3.208739 | 0.469183  |
| Na | 4.338072  | -0.159242 | 0.040520  |
| H  | 1.470156  | 0.096356  | -4.990120 |
| H  | 2.936873  | 0.327370  | -3.001740 |
| H  | -0.263028 | 0.214801  | -3.993680 |
| O  | 6.680110  | -0.609972 | 0.106946  |
| O  | 4.238259  | -0.747217 | 2.319085  |
| C  | 7.339774  | 0.353211  | 0.859612  |
| H  | 7.611912  | 1.210648  | 0.204590  |
| H  | 6.670049  | 0.723739  | 1.663686  |
| C  | 7.662680  | -1.461256 | -0.376828 |
| H  | 7.241558  | -2.474879 | -0.534858 |
| H  | 8.033252  | -1.078916 | -1.354177 |
| C  | 8.791661  | -1.512504 | 0.633508  |
| H  | 8.699841  | -2.419944 | 1.270613  |
| H  | 9.781687  | -1.507615 | 0.127383  |
| C  | 8.585667  | -0.271442 | 1.457815  |
| H  | 9.454041  | 0.418490  | 1.378024  |
| H  | 8.414964  | -0.537117 | 2.524586  |
| C  | 5.118192  | -1.366504 | 3.194676  |
| H  | 5.893513  | -1.915372 | 2.619261  |
| H  | 5.622680  | -0.593367 | 3.815658  |
| C  | 3.007217  | -0.697682 | 2.958609  |
| H  | 2.907378  | 0.272932  | 3.492995  |
| H  | 2.197395  | -0.773763 | 2.204530  |
| C  | 2.914853  | -1.854648 | 3.935041  |
| H  | 2.499157  | -1.518887 | 4.910159  |
| H  | 2.279836  | -2.667595 | 3.519206  |
| C  | 4.336880  | -2.321829 | 4.074686  |
| H  | 4.682409  | -2.266000 | 5.130048  |
| H  | 4.440723  | -3.364887 | 3.701832  |

165

Figure\_S5\_imid-3\_modeS1\_ts(CuHadd)\_03 / electronic energy: -3525.636864088099 a.u. / lowest freq: -768.46 cm<sup>-1</sup>

|   |           |          |           |
|---|-----------|----------|-----------|
| C | 0.573259  | 3.187724 | -0.017448 |
| H | 1.263637  | 3.093949 | 0.833309  |
| C | -0.858506 | 2.713917 | 0.317940  |
| H | -1.622896 | 3.404596 | -0.076612 |
| C | 0.118282  | 1.190580 | -1.207412 |
| C | 2.194788  | 2.268326 | -1.788630 |
| C | 2.103526  | 2.310243 | -3.185980 |
| C | 3.464157  | 2.242178 | -1.187667 |
| C | 3.246104  | 2.339285 | -3.979215 |
| H | 1.107936  | 2.315903 | -3.638111 |
| C | 4.605912  | 2.300959 | -1.991278 |
| C | 4.504508  | 2.352139 | -3.378502 |
| H | 3.150796  | 2.364113 | -5.066878 |
| H | 5.581465  | 2.268070 | -1.502508 |
| H | 5.408748  | 2.387567 | -3.989818 |
| C | -2.063405 | 0.580848 | -0.360643 |

|    |           |           |           |
|----|-----------|-----------|-----------|
| C  | -3.360711 | 1.113637  | -0.442905 |
| C  | -1.898770 | -0.795013 | -0.139413 |
| C  | -4.477314 | 0.281073  | -0.300754 |
| C  | -3.018496 | -1.621919 | 0.025675  |
| C  | -4.305156 | -1.084395 | -0.061669 |
| H  | -5.170106 | -1.724499 | 0.071084  |
| S  | 3.694481  | 1.992067  | 0.579287  |
| O  | 5.060444  | 1.403054  | 0.695177  |
| O  | 2.654198  | 0.986623  | 0.944725  |
| O  | 3.546424  | 3.304443  | 1.232904  |
| Cu | 0.604398  | -0.183695 | -2.448710 |
| C  | 0.610502  | 4.600999  | -0.543292 |
| C  | 1.264879  | 5.610916  | 0.183364  |
| C  | -0.008639 | 4.929361  | -1.764407 |
| C  | 1.307044  | 6.919680  | -0.306628 |
| H  | 1.737450  | 5.389729  | 1.131531  |
| C  | 0.037064  | 6.238956  | -2.250412 |
| H  | -0.522888 | 4.170062  | -2.340475 |
| C  | 0.695358  | 7.233169  | -1.522856 |
| H  | 1.813246  | 7.691883  | 0.258084  |
| H  | -0.438282 | 6.482985  | -3.191624 |
| H  | 0.729573  | 8.246949  | -1.900318 |
| C  | -1.080719 | 2.527851  | 1.798558  |
| C  | -1.947917 | 3.386257  | 2.496519  |
| C  | -0.442169 | 1.486270  | 2.497457  |
| C  | -2.165563 | 3.209188  | 3.866159  |
| H  | -2.453708 | 4.194518  | 1.983242  |
| C  | -0.668225 | 1.309789  | 3.864881  |
| H  | 0.219232  | 0.803692  | 1.981473  |
| C  | -1.529165 | 2.170116  | 4.548984  |
| H  | -2.830539 | 3.877074  | 4.398123  |
| H  | -0.174088 | 0.506576  | 4.394886  |
| H  | -1.702277 | 2.032432  | 5.608366  |
| N  | 0.982556  | 2.218162  | -1.056303 |
| N  | -0.933976 | 1.433144  | -0.409393 |
| H  | -0.903096 | -1.210751 | -0.047756 |
| H  | -3.507951 | 2.171927  | -0.615214 |
| C  | -2.848822 | -3.047038 | 0.354620  |
| C  | -2.845263 | -4.020729 | -0.682052 |
| C  | -2.689507 | -3.444051 | 1.712115  |
| C  | -2.657994 | -5.372676 | -0.340882 |
| C  | -2.503887 | -4.808607 | 2.000632  |
| C  | -2.484159 | -5.757941 | 0.984220  |
| H  | -2.643786 | -6.138761 | -1.104817 |
| H  | -2.374170 | -5.145490 | 3.020581  |
| H  | -2.337959 | -6.802779 | 1.226201  |
| C  | -5.838474 | 0.840823  | -0.374489 |
| C  | -6.463168 | 1.341205  | 0.801665  |
| C  | -6.544914 | 0.824411  | -1.609147 |
| C  | -7.786360 | 1.812216  | 0.717610  |
| C  | -7.865498 | 1.308235  | -1.640996 |
| C  | -8.475360 | 1.796845  | -0.490510 |
| H  | -8.296659 | 2.187761  | 1.594671  |
| H  | -8.434564 | 1.302114  | -2.561290 |
| H  | -9.493758 | 2.161213  | -0.534250 |
| C  | -5.920446 | 0.281609  | -2.895339 |
| H  | -4.868225 | -0.027668 | -2.730966 |
| C  | -5.874087 | 1.355441  | -3.989633 |
| H  | -5.348128 | 2.258537  | -3.612295 |
| H  | -5.317239 | 0.973907  | -4.872133 |
| H  | -6.894378 | 1.643564  | -4.318931 |
| C  | -6.661257 | -0.970475 | -3.378995 |
| H  | -6.675668 | -1.736015 | -2.573699 |
| H  | -7.706517 | -0.732876 | -3.668926 |
| H  | -6.140380 | -1.405035 | -4.258954 |
| C  | -5.752512 | 1.356907  | 2.156254  |
| H  | -4.707628 | 0.995622  | 2.067531  |
| C  | -6.443882 | 0.414938  | 3.148491  |
| H  | -5.862818 | 0.365256  | 4.094281  |
| H  | -7.472238 | 0.762127  | 3.383095  |
| H  | -6.497465 | -0.609896 | 2.722321  |
| C  | -5.656579 | 2.779912  | 2.719894  |
| H  | -5.071728 | 2.774304  | 3.663643  |
| H  | -5.138702 | 3.441099  | 1.992546  |
| H  | -6.660448 | 3.199741  | 2.938630  |
| C  | -2.722877 | -2.437626 | 2.864544  |
| H  | -2.891054 | -1.405621 | 2.494883  |
| C  | -3.034895 | -3.643549 | -2.151422 |
| H  | -3.164641 | -2.548744 | -2.271537 |
| C  | -1.800792 | -4.014809 | -2.980865 |
| H  | -0.901295 | -3.533551 | -2.545716 |
| H  | -1.644530 | -5.113605 | -3.007718 |
| H  | -1.917900 | -3.649562 | -4.023505 |
| C  | -4.303089 | -4.284612 | -2.727112 |
| H  | -4.218335 | -5.391316 | -2.756468 |
| H  | -5.182430 | -4.006427 | -2.107410 |
| H  | -4.479083 | -3.917286 | -3.760851 |
| C  | -1.385336 | -2.404181 | 3.613837  |

|    |           |           |           |
|----|-----------|-----------|-----------|
| H  | -1.140895 | -3.393370 | 4.053993  |
| H  | -0.571269 | -2.104667 | 2.920726  |
| H  | -1.428845 | -1.658589 | 4.435536  |
| C  | -3.885184 | -2.732188 | 3.820442  |
| H  | -4.841238 | -2.765760 | 3.255183  |
| H  | -3.741402 | -3.700169 | 4.344872  |
| H  | -3.963715 | -1.927514 | 4.582691  |
| C  | 2.318523  | -1.323030 | -2.648984 |
| C  | 1.430391  | -1.422544 | -3.790343 |
| H  | 0.902757  | -2.372020 | -3.934769 |
| B  | 2.356528  | -2.364395 | -1.562964 |
| O  | 1.524234  | -3.471364 | -1.503322 |
| O  | 3.297274  | -2.408495 | -0.512354 |
| C  | 1.793077  | -4.164240 | -0.271132 |
| C  | 3.271195  | -3.762768 | 0.008979  |
| C  | 0.843759  | -3.612545 | 0.778243  |
| H  | -0.177273 | -3.705242 | 0.397090  |
| H  | 0.902545  | -4.158573 | 1.729811  |
| H  | 1.032656  | -2.546992 | 0.972817  |
| C  | 1.560894  | -5.644100 | -0.479153 |
| H  | 1.847392  | -6.219494 | 0.413088  |
| H  | 0.496139  | -5.834813 | -0.671135 |
| H  | 2.128607  | -6.026891 | -1.336183 |
| C  | 4.267027  | -4.583741 | -0.793607 |
| H  | 4.324884  | -5.618958 | -0.430096 |
| H  | 3.998058  | -4.607993 | -1.858904 |
| H  | 5.265937  | -4.137335 | -0.702795 |
| C  | 3.653337  | -3.756157 | 1.472858  |
| H  | 3.023791  | -3.087109 | 2.071990  |
| H  | 3.556981  | -4.765175 | 1.898585  |
| H  | 4.702725  | -3.453526 | 1.604579  |
| Na | 4.205574  | -0.833273 | 0.919123  |
| H  | 1.758781  | -0.994064 | -4.744043 |
| H  | 3.118780  | -0.574671 | -2.713046 |
| H  | 0.020128  | -0.533041 | -3.887464 |
| O  | 6.252443  | -1.564866 | -0.131745 |
| O  | 4.080726  | -0.924266 | 3.291924  |
| C  | 6.059761  | -1.200542 | -1.461645 |
| H  | 5.798070  | -2.094914 | -2.065399 |
| H  | 5.216710  | -0.481149 | -1.515253 |
| C  | 7.426829  | -0.966527 | 0.314513  |
| H  | 7.225807  | -0.398235 | 1.246381  |
| H  | 8.167921  | -1.762900 | 0.542542  |
| C  | 7.975101  | -0.046198 | -0.756979 |
| H  | 7.661543  | 1.002439  | -0.558603 |
| H  | 9.083291  | -0.102676 | -0.825470 |
| C  | 7.316366  | -0.552589 | -1.997286 |
| H  | 7.959977  | -1.316750 | -2.486922 |
| H  | 7.088130  | 0.268281  | -2.711645 |
| C  | 2.838960  | -0.596511 | 3.821958  |
| H  | 2.060004  | -0.688883 | 3.036302  |
| H  | 2.590987  | -1.308344 | 4.640257  |
| C  | 5.016268  | -0.167130 | 3.982552  |
| H  | 5.381626  | -0.746136 | 4.859750  |
| H  | 5.880004  | 0.051292  | 3.320912  |
| C  | 4.361470  | 1.121682  | 4.437502  |
| H  | 4.668327  | 1.381302  | 5.474214  |
| H  | 4.627029  | 1.954721  | 3.750351  |
| C  | 2.891206  | 0.822359  | 4.356905  |
| H  | 2.408802  | 0.887240  | 5.356686  |
| H  | 2.389812  | 1.525505  | 3.657382  |

165

Figure\_S5\_imid-3\_modeS1\_ts(CuHadd)\_04 / electronic energy: -3525.636276276343 a.u. / lowest freq: -755.58 cm<sup>-1</sup>

|   |           |           |           |
|---|-----------|-----------|-----------|
| C | 0.475132  | 3.228426  | -0.052348 |
| H | 1.163908  | 3.133791  | 0.799832  |
| C | -0.947150 | 2.725293  | 0.271073  |
| H | -1.722217 | 3.389971  | -0.146994 |
| C | 0.076313  | 1.217872  | -1.237866 |
| C | 2.114565  | 2.357822  | -1.831967 |
| C | 2.022568  | 2.412029  | -3.228572 |
| C | 3.383348  | 2.346768  | -1.230378 |
| C | 3.165181  | 2.467858  | -4.020476 |
| H | 1.027163  | 2.405252  | -3.680712 |
| C | 4.524729  | 2.429497  | -2.031879 |
| C | 4.422892  | 2.493485  | -3.418581 |
| H | 3.070393  | 2.502713  | -5.107898 |
| H | 5.499979  | 2.409492  | -1.542287 |
| H | 5.326789  | 2.549025  | -4.028902 |
| C | -2.085096 | 0.545246  | -0.378814 |
| C | -3.399019 | 1.041743  | -0.427214 |
| C | -1.878152 | -0.828136 | -0.177641 |
| C | -4.488694 | 0.176431  | -0.273837 |
| C | -2.971061 | -1.688169 | -0.001423 |
| C | -4.273753 | -1.186569 | -0.057818 |
| H | -5.117601 | -1.852217 | 0.084768  |
| S | 3.613720  | 2.093136  | 0.535184  |
| O | 4.983920  | 1.513511  | 0.650926  |
| O | 2.580857  | 1.078570  | 0.898917  |

|    |           |           |           |
|----|-----------|-----------|-----------|
| O  | 3.454349  | 3.402921  | 1.191034  |
| Cu | 0.620532  | -0.138479 | -2.478501 |
| C  | 0.490391  | 4.648931  | -0.558724 |
| C  | 1.119591  | 5.660397  | 0.187733  |
| C  | -0.124839 | 4.983040  | -1.780206 |
| C  | 1.141068  | 6.976613  | -0.283206 |
| H  | 1.588093  | 5.434462  | 1.136881  |
| C  | -0.099856 | 6.300130  | -2.247154 |
| H  | -0.619965 | 4.222589  | -2.371303 |
| C  | 0.533562  | 7.295989  | -1.499992 |
| H  | 1.627839  | 7.749996  | 0.296773  |
| H  | -0.572032 | 6.548716  | -3.188764 |
| H  | 0.551668  | 8.315564  | -1.862668 |
| C  | -1.184390 | 2.559276  | 1.751570  |
| C  | -2.075652 | 3.412901  | 2.424355  |
| C  | -0.536469 | 1.540500  | 2.475140  |
| C  | -2.308660 | 3.253141  | 3.793522  |
| H  | -2.588964 | 4.203595  | 1.891563  |
| C  | -0.779373 | 1.379742  | 3.841668  |
| H  | 0.145163  | 0.863081  | 1.978695  |
| C  | -1.664575 | 2.235184  | 4.500661  |
| H  | -2.993499 | 3.916491  | 4.305659  |
| H  | -0.279716 | 0.592593  | 4.390377  |
| H  | -1.850865 | 2.109899  | 5.559344  |
| N  | 0.903299  | 2.277785  | -1.099977 |
| N  | -0.980707 | 1.430356  | -0.436039 |
| H  | -0.869911 | -1.216967 | -0.108569 |
| H  | -3.580870 | 2.097366  | -0.580960 |
| C  | -2.755464 | -3.110782 | 0.310336  |
| C  | -2.734889 | -4.073016 | -0.736700 |
| C  | -2.564438 | -3.516182 | 1.661276  |
| C  | -2.502864 | -5.422178 | -0.412220 |
| C  | -2.332500 | -4.877109 | 1.932839  |
| C  | -2.299497 | -5.815357 | 0.906421  |
| H  | -2.473770 | -6.179378 | -1.184548 |
| H  | -2.175425 | -5.219550 | 2.947074  |
| H  | -2.117487 | -6.857510 | 1.135318  |
| C  | -5.865711 | 0.700180  | -0.305678 |
| C  | -6.495196 | 1.110103  | 0.902552  |
| C  | -6.580040 | 0.740845  | -1.535074 |
| C  | -7.831198 | 1.548823  | 0.855117  |
| C  | -7.912642 | 1.191730  | -1.530101 |
| C  | -8.527485 | 1.590979  | -0.348180 |
| H  | -8.345287 | 1.854934  | 1.756603  |
| H  | -8.487425 | 1.228226  | -2.446132 |
| H  | -9.555335 | 1.930228  | -0.363908 |
| C  | -5.951790 | 0.291545  | -2.854929 |
| H  | -4.892682 | -0.005711 | -2.714540 |
| C  | -5.934388 | 1.431867  | -3.880580 |
| H  | -5.424053 | 2.320338  | -3.450679 |
| H  | -5.376039 | 1.117381  | -4.788199 |
| H  | -6.962565 | 1.718972  | -4.185379 |
| C  | -6.668736 | -0.943933 | -3.411932 |
| H  | -6.659786 | -1.758945 | -2.656523 |
| H  | -7.721129 | -0.712224 | -3.679946 |
| H  | -6.145307 | -1.310353 | -4.320902 |
| C  | -5.774601 | 1.063680  | 2.251200  |
| H  | -4.719331 | 0.742868  | 2.133226  |
| C  | -6.428701 | 0.039797  | 3.185760  |
| H  | -5.839044 | -0.051365 | 4.123070  |
| H  | -7.465420 | 0.339291  | 3.447767  |
| H  | -6.454476 | -0.957075 | 2.695637  |
| C  | -5.718805 | 2.450387  | 2.903751  |
| H  | -5.121766 | 2.404097  | 3.838987  |
| H  | -5.232819 | 3.174019  | 2.214845  |
| H  | -6.733132 | 2.821066  | 3.159843  |
| C  | -2.608032 | -2.522026 | 2.824084  |
| H  | -2.822829 | -1.493844 | 2.468301  |
| C  | -2.946535 | -3.685236 | -2.200254 |
| H  | -3.115672 | -2.594353 | -2.306315 |
| C  | -1.704200 | -4.002479 | -3.039971 |
| H  | -0.820529 | -3.491071 | -2.605952 |
| H  | -1.506966 | -5.094381 | -3.077117 |
| H  | -1.841247 | -3.633089 | -4.078710 |
| C  | -4.194658 | -4.363205 | -2.777597 |
| H  | -4.072138 | -5.465901 | -2.820264 |
| H  | -5.080151 | -4.122120 | -2.151056 |
| H  | -4.388040 | -3.990547 | -3.806315 |
| C  | -1.255105 | -2.445980 | 3.541919  |
| H  | -0.965518 | -3.429333 | 3.967722  |
| H  | -0.469110 | -2.112749 | 2.832218  |
| H  | -1.304691 | -1.707641 | 4.369878  |
| C  | -3.735633 | -2.867283 | 3.804363  |
| H  | -4.702295 | -2.936086 | 3.260915  |
| H  | -3.541917 | -3.831284 | 4.319901  |
| H  | -3.828067 | -2.070298 | 4.573069  |
| C  | 2.368741  | -1.227530 | -2.688775 |
| C  | 1.488654  | -1.331009 | -3.835609 |

|    |           |           |           |
|----|-----------|-----------|-----------|
| H  | 0.987374  | -2.291793 | -3.998221 |
| B  | 2.437088  | -2.295759 | -1.630143 |
| O  | 1.639740  | -3.429231 | -1.597702 |
| O  | 3.371585  | -2.329827 | -0.576110 |
| C  | 1.910197  | -4.125429 | -0.367363 |
| C  | 3.372220  | -3.686548 | -0.060188 |
| C  | 0.930492  | -3.607179 | 0.670650  |
| H  | -0.080288 | -3.719052 | 0.268733  |
| H  | 0.985005  | -4.160433 | 1.618277  |
| H  | 1.090920  | -2.539476 | 0.877926  |
| C  | 1.718888  | -5.608990 | -0.590100 |
| H  | 2.010726  | -6.184588 | 0.300257  |
| H  | 0.661210  | -5.824843 | -0.794358 |
| H  | 2.303868  | -5.970468 | -1.444730 |
| C  | 4.403213  | -4.480742 | -0.844386 |
| H  | 4.469868  | -5.517766 | -0.487643 |
| H  | 4.162787  | -4.500916 | -1.916510 |
| H  | 5.391168  | -4.018702 | -0.720880 |
| C  | 3.729807  | -3.670334 | 1.409858  |
| H  | 3.072113  | -3.018146 | 1.997856  |
| H  | 3.654689  | -4.681364 | 1.835269  |
| H  | 4.767705  | -3.335623 | 1.552441  |
| Na | 4.138815  | -0.718106 | 0.898867  |
| H  | 1.806184  | -0.875696 | -4.780493 |
| H  | 3.155506  | -0.462934 | -2.734356 |
| H  | 0.047330  | -0.478105 | -3.923436 |
| O  | 6.232731  | -1.509087 | 0.081914  |
| O  | 4.001018  | -0.814428 | 3.266355  |
| C  | 6.230552  | -1.094503 | -1.249410 |
| H  | 6.110214  | -1.983998 | -1.903596 |
| H  | 5.370994  | -0.414584 | -1.427250 |
| C  | 7.419726  | -1.078868 | 0.661509  |
| H  | 7.219453  | -0.166498 | 1.263600  |
| H  | 7.815223  | -1.868154 | 1.335385  |
| C  | 8.416952  | -0.767537 | -0.429714 |
| H  | 9.101919  | 0.059540  | -0.142163 |
| H  | 9.002356  | -1.679632 | -0.681467 |
| C  | 7.534696  | -0.391434 | -1.575399 |
| H  | 7.956627  | -0.729423 | -2.546939 |
| H  | 7.382637  | 0.710224  | -1.593730 |
| C  | 2.758366  | -0.492984 | 3.797820  |
| H  | 1.977300  | -0.597743 | 3.015832  |
| H  | 2.519042  | -1.200121 | 4.622778  |
| C  | 4.932929  | -0.048049 | 3.951531  |
| H  | 5.305425  | -0.621343 | 4.829454  |
| H  | 5.792749  | 0.174009  | 3.286011  |
| C  | 4.269957  | 1.237669  | 4.403969  |
| H  | 4.573244  | 1.499514  | 5.441177  |
| H  | 4.532368  | 2.071763  | 3.716911  |
| C  | 2.801336  | 0.930399  | 4.320927  |
| H  | 2.314646  | 1.001619  | 5.318178  |
| H  | 2.299317  | 1.624757  | 3.613071  |

165

Figure\_S5\_imid-3\_modeS1\_prod(CuHadd) / electronic energy: -3525.674285600661 a.u. / lowest freq: 7.85 cm<sup>-1</sup>

|    |           |           |           |
|----|-----------|-----------|-----------|
| C  | 0.109390  | 3.509837  | 0.278317  |
| H  | 0.823751  | 3.466564  | 1.115804  |
| C  | -1.225575 | 2.794015  | 0.584878  |
| H  | -2.092893 | 3.389142  | 0.255904  |
| C  | -0.009939 | 1.519783  | -0.998260 |
| C  | 1.843645  | 2.969076  | -1.536879 |
| C  | 1.727948  | 3.285372  | -2.895343 |
| C  | 3.116068  | 2.934892  | -0.946043 |
| C  | 2.854813  | 3.578568  | -3.656630 |
| H  | 0.731954  | 3.292457  | -3.344196 |
| C  | 4.241533  | 3.242592  | -1.712499 |
| C  | 4.115159  | 3.571554  | -3.059683 |
| H  | 2.746634  | 3.815811  | -4.717063 |
| H  | 5.222317  | 3.185958  | -1.237164 |
| H  | 5.004841  | 3.806821  | -3.647571 |
| C  | -2.122276 | 0.569784  | -0.272001 |
| C  | -3.479626 | 0.937793  | -0.289774 |
| C  | -1.784206 | -0.792799 | -0.220053 |
| C  | -4.480783 | -0.039020 | -0.246166 |
| C  | -2.791876 | -1.768143 | -0.159378 |
| C  | -4.136032 | -1.389387 | -0.176670 |
| H  | -4.912661 | -2.144051 | -0.121554 |
| S  | 3.359653  | 2.305144  | 0.718354  |
| O  | 4.794294  | 1.905674  | 0.756420  |
| O  | 2.469727  | 1.103029  | 0.766727  |
| O  | 2.997195  | 3.370851  | 1.670177  |
| Cu | 1.105255  | 0.238087  | -1.937223 |
| C  | -0.070536 | 4.942601  | -0.156856 |
| C  | 0.505305  | 5.986304  | 0.588413  |
| C  | -0.800972 | 5.254388  | -1.319234 |
| C  | 0.352018  | 7.314431  | 0.179161  |
| H  | 1.072369  | 5.774565  | 1.486075  |
| C  | -0.950604 | 6.583532  | -1.724582 |
| H  | -1.250021 | 4.467433  | -1.912495 |

|   |           |           |           |
|---|-----------|-----------|-----------|
| C | -0.374806 | 7.612831  | -0.976061 |
| H | 0.797843  | 8.112973  | 0.757955  |
| H | -1.512348 | 6.815401  | -2.620166 |
| H | -0.491443 | 8.641611  | -1.291350 |
| C | -1.384039 | 2.455403  | 2.047045  |
| C | -2.389528 | 3.071180  | 2.812242  |
| C | -0.550121 | 1.499240  | 2.658201  |
| C | -2.552189 | 2.741058  | 4.161165  |
| H | -3.047638 | 3.806938  | 2.367191  |
| C | -0.721584 | 1.167118  | 4.004375  |
| H | 0.221132  | 0.999911  | 2.088975  |
| C | -1.722129 | 1.787414  | 4.755539  |
| H | -3.325553 | 3.222605  | 4.745346  |
| H | -0.079512 | 0.427377  | 4.464647  |
| H | -1.854138 | 1.529547  | 5.798288  |
| N | 0.650430  | 2.680583  | -0.817512 |
| N | -1.112530 | 1.565507  | -0.234880 |
| H | -0.743779 | -1.090237 | -0.179545 |
| H | -3.766244 | 1.979672  | -0.339508 |
| C | -2.449772 | -3.192530 | -0.007456 |
| C | -2.413524 | -4.042105 | -1.147976 |
| C | -2.167690 | -3.716056 | 1.285287  |
| C | -2.071115 | -5.395708 | -0.973651 |
| C | -1.819736 | -5.073933 | 1.405038  |
| C | -1.771318 | -5.900482 | 0.287343  |
| H | -2.025580 | -6.067939 | -1.820231 |
| H | -1.585158 | -5.501282 | 2.370956  |
| H | -1.501282 | -6.942621 | 0.399697  |
| C | -5.902623 | 0.348714  | -0.245947 |
| C | -6.571689 | 0.584654  | 0.987259  |
| C | -6.617141 | 0.421619  | -1.473820 |
| C | -7.946104 | 0.884921  | 0.965481  |
| C | -7.989266 | 0.730441  | -1.442339 |
| C | -8.642575 | 0.959665  | -0.236120 |
| H | -8.489888 | 1.054987  | 1.885271  |
| H | -8.564650 | 0.785932  | -2.357035 |
| H | -9.700226 | 1.190247  | -0.231997 |
| C | -5.945872 | 0.153621  | -2.821479 |
| H | -4.861289 | -0.041715 | -2.697640 |
| C | -6.048496 | 1.371766  | -3.747827 |
| H | -5.634142 | 2.269383  | -3.240673 |
| H | -5.460428 | 1.194812  | -4.673735 |
| H | -7.101152 | 1.574370  | -4.036495 |
| C | -6.529945 | -1.098528 | -3.486016 |
| H | -6.439657 | -1.967808 | -2.799777 |
| H | -7.599877 | -0.954515 | -3.745947 |
| H | -5.968825 | -1.333096 | -4.415846 |
| C | -5.851375 | 0.492179  | 2.333655  |
| H | -4.767398 | 0.300441  | 2.197894  |
| C | -6.390197 | -0.679252 | 3.162504  |
| H | -5.797510 | -0.789853 | 4.095838  |
| H | -7.454988 | -0.521990 | 3.435783  |
| H | -6.301984 | -1.623878 | 2.583940  |
| C | -5.947356 | 1.810145  | 3.112013  |
| H | -5.345907 | 1.743644  | 4.043108  |
| H | -5.546586 | 2.643771  | 2.496590  |
| H | -6.995573 | 2.041152  | 3.394299  |
| C | -2.234518 | -2.850862 | 2.545302  |
| H | -2.554016 | -1.815836 | 2.308205  |
| C | -2.713667 | -3.526323 | -2.555351 |
| H | -2.963938 | -2.446104 | -2.542474 |
| C | -1.487752 | -3.662904 | -3.465483 |
| H | -0.625644 | -3.130062 | -3.013388 |
| H | -1.212810 | -4.727452 | -3.619429 |
| H | -1.695416 | -3.205524 | -4.456369 |
| C | -3.932824 | -4.235618 | -3.156420 |
| H | -3.731146 | -5.314803 | -3.322104 |
| H | -4.804756 | -4.131935 | -2.475551 |
| H | -4.198872 | -3.773584 | -4.131233 |
| C | -0.856094 | -2.727881 | 3.202184  |
| H | -0.482783 | -3.714308 | 3.548838  |
| H | -0.131543 | -2.303040 | 2.476503  |
| H | -0.910801 | -2.044289 | 4.075964  |
| C | -3.274964 | -3.388448 | 3.535317  |
| H | -4.261677 | -3.483384 | 3.033286  |
| H | -2.977202 | -4.379579 | 3.937207  |
| H | -3.387752 | -2.683960 | 4.387178  |
| C | 2.482212  | -0.751529 | -2.965765 |
| C | 1.919286  | -0.939211 | -4.368754 |
| H | 1.040013  | -1.602727 | -4.369220 |
| B | 2.672903  | -1.975929 | -2.104684 |
| O | 1.953113  | -3.161980 | -2.220697 |
| O | 3.609594  | -2.098967 | -1.044113 |
| C | 2.214397  | -3.945135 | -1.044380 |
| C | 3.657871  | -3.501220 | -0.683139 |
| C | 1.219908  | -3.515062 | 0.021566  |
| H | 0.215649  | -3.587713 | -0.403478 |
| H | 1.261552  | -4.144630 | 0.921158  |

|    |          |           |           |
|----|----------|-----------|-----------|
| H  | 1.377012 | -2.467258 | 0.318579  |
| C  | 2.050302 | -5.411002 | -1.375541 |
| H  | 2.339850 | -6.045607 | -0.525316 |
| H  | 0.999299 | -5.628539 | -1.610465 |
| H  | 2.651440 | -5.700705 | -2.246297 |
| C  | 4.707002 | -4.173997 | -1.553667 |
| H  | 4.822879 | -5.236434 | -1.297193 |
| H  | 4.450069 | -4.104353 | -2.619775 |
| H  | 5.681276 | -3.689463 | -1.405387 |
| C  | 4.013740 | -3.649682 | 0.779288  |
| H  | 3.363199 | -3.052442 | 1.429470  |
| H  | 3.928027 | -4.701306 | 1.089524  |
| H  | 5.052127 | -3.335589 | 0.955414  |
| Na | 4.157703 | -0.440982 | 0.468840  |
| H  | 2.640204 | -1.395571 | -5.075406 |
| H  | 3.361765 | -0.080357 | -2.954163 |
| H  | 1.591891 | 0.002713  | -4.842794 |
| O  | 6.411594 | -1.084154 | 0.308935  |
| O  | 3.988808 | -0.851969 | 2.749139  |
| C  | 6.879096 | -0.964107 | -0.992364 |
| H  | 7.614625 | -1.774050 | -1.196132 |
| H  | 6.036111 | -1.063477 | -1.707783 |
| C  | 7.267341 | -0.336698 | 1.110413  |
| H  | 6.682477 | 0.148055  | 1.920063  |
| H  | 8.014777 | -1.014119 | 1.578741  |
| C  | 7.963580 | 0.715437  | 0.261719  |
| H  | 7.641773 | 1.740980  | 0.546828  |
| H  | 9.067767 | 0.630586  | 0.364765  |
| C  | 7.533183 | 0.390318  | -1.139262 |
| H  | 8.395259 | 0.352525  | -1.840231 |
| H  | 6.788164 | 1.135210  | -1.495929 |
| C  | 4.763861 | -1.526019 | 3.681088  |
| H  | 5.474871 | -2.202993 | 3.162862  |
| H  | 5.347327 | -0.787162 | 4.273891  |
| C  | 2.730070 | -0.656879 | 3.310997  |
| H  | 2.590048 | 0.421143  | 3.542643  |
| H  | 1.958228 | -0.960472 | 2.572921  |
| C  | 2.594357 | -1.493010 | 4.572834  |
| H  | 2.556396 | -0.833691 | 5.468096  |
| H  | 1.690477 | -2.138378 | 4.546115  |
| C  | 3.846651 | -2.313349 | 4.585176  |
| H  | 4.266466 | -2.419206 | 5.690918  |
| H  | 3.651005 | -3.316744 | 4.145727  |

165

Figure\_S5\_imid-3\_modeS2\_ed(CuHadd) / electronic energy: -3525.647282907852 a.u. / lowest freq: 11.24 cm<sup>-1</sup>

|    |           |           |           |
|----|-----------|-----------|-----------|
| C  | 1.784386  | 0.998893  | 2.406401  |
| H  | 2.390942  | 0.270403  | 2.960597  |
| C  | 0.269908  | 0.667579  | 2.410006  |
| H  | -0.341883 | 1.521455  | 2.742969  |
| C  | 1.071845  | 0.573414  | 0.183629  |
| C  | 3.393038  | 1.172882  | 0.373314  |
| C  | 3.402135  | 2.036091  | -0.732449 |
| C  | 4.602939  | 0.574813  | 0.778159  |
| C  | 4.575252  | 2.324159  | -1.419513 |
| H  | 2.460791  | 2.491607  | -1.049289 |
| C  | 5.779904  | 0.898434  | 0.096292  |
| C  | 5.778303  | 1.767402  | -0.990549 |
| H  | 4.540722  | 2.989515  | -2.285486 |
| H  | 6.701034  | 0.409543  | 0.418555  |
| H  | 6.711440  | 1.990807  | -1.511915 |
| C  | -1.252247 | 0.037031  | 0.479714  |
| C  | -2.383851 | 0.812676  | 0.761368  |
| C  | -1.395082 | -1.165580 | -0.229389 |
| C  | -3.650685 | 0.386250  | 0.346184  |
| C  | -2.665896 | -1.602690 | -0.627617 |
| C  | -3.791214 | -0.822275 | -0.343188 |
| H  | -4.776572 | -1.164856 | -0.638219 |
| S  | 4.735779  | -0.716046 | 2.044031  |
| O  | 6.022482  | -1.384093 | 1.773041  |
| O  | 3.551043  | -1.589891 | 1.762201  |
| O  | 4.655951  | -0.045007 | 3.355466  |
| Cu | 1.205157  | 0.390391  | -1.782974 |
| C  | 2.065928  | 2.387991  | 2.926121  |
| C  | 2.849366  | 2.574398  | 4.078784  |
| C  | 1.531142  | 3.515908  | 2.276676  |
| C  | 3.117209  | 3.862485  | 4.551710  |
| H  | 3.244029  | 1.726282  | 4.621187  |
| C  | 1.802749  | 4.802152  | 2.752075  |
| H  | 0.897040  | 3.394667  | 1.408070  |
| C  | 2.598889  | 4.975478  | 3.886039  |
| H  | 3.723836  | 3.997436  | 5.437846  |
| H  | 1.393834  | 5.665532  | 2.244562  |
| H  | 2.807097  | 5.971788  | 4.253996  |
| C  | -0.079210 | -0.535432 | 3.251879  |
| C  | -0.917574 | -0.394591 | 4.372087  |
| C  | 0.397705  | -1.815128 | 2.914003  |
| C  | -1.265927 | -1.510092 | 5.139339  |
| H  | -1.304163 | 0.577175  | 4.651973  |



|   |           |           |           |
|---|-----------|-----------|-----------|
| C | 0.059438  | -2.924484 | 3.692433  |
| H | 1.017735  | -1.956668 | 2.041057  |
| C | -0.775674 | -2.773545 | 4.801477  |
| H | -1.915093 | -1.394259 | 5.997544  |
| H | 0.436848  | -3.903933 | 3.429417  |
| H | -1.044889 | -3.636009 | 5.397238  |
| N | 2.127957  | 0.895084  | 0.959681  |
| N | 0.011832  | 0.419548  | 0.980926  |
| H | -0.526868 | -1.781723 | -0.419846 |
| H | -2.282378 | 1.740648  | 1.310627  |
| C | -2.843802 | -2.922796 | -1.263040 |
| C | -2.923442 | -3.027865 | -2.679950 |
| C | -3.051226 | -4.072844 | -0.449645 |
| C | -3.215941 | -4.279711 | -3.252287 |
| C | -3.337288 | -5.301886 | -1.072009 |
| C | -3.415011 | -5.401351 | -2.456084 |
| H | -3.309552 | -4.391166 | -4.324110 |
| H | -3.515802 | -6.192340 | -0.484155 |
| H | -3.642649 | -6.354632 | -2.915599 |
| C | -4.843350 | 1.187279  | 0.672531  |
| C | -5.442125 | 1.074419  | 1.958431  |
| C | -5.398042 | 2.062794  | -0.301777 |
| C | -6.577030 | 1.853952  | 2.247567  |
| C | -6.534758 | 2.819531  | 0.036123  |
| C | -7.113132 | 2.716251  | 1.296873  |
| H | -7.057465 | 1.793208  | 3.215211  |
| H | -6.981293 | 3.496161  | -0.680583 |
| H | -7.987874 | 3.306609  | 1.537909  |
| C | -4.799473 | 2.205042  | -1.701905 |
| H | -3.908111 | 1.557431  | -1.826851 |
| C | -4.314431 | 3.636230  | -1.954783 |
| H | -3.598751 | 3.938628  | -1.160800 |
| H | -3.791322 | 3.689164  | -2.933470 |
| H | -5.160551 | 4.354827  | -1.969251 |
| C | -5.799396 | 1.762861  | -2.776887 |
| H | -6.154084 | 0.732026  | -2.563285 |
| H | -6.676215 | 2.442910  | -2.816555 |
| H | -5.309498 | 1.761550  | -3.774129 |
| C | -4.902240 | 0.122034  | 3.027564  |
| H | -4.013725 | -0.432470 | 2.663134  |
| C | -5.939824 | -0.946765 | 3.391194  |
| H | -5.492175 | -1.690046 | 4.085355  |
| H | -6.828110 | -0.497001 | 3.882519  |
| H | -6.267482 | -1.483390 | 2.475121  |
| C | -4.441063 | 0.890910  | 4.271271  |
| H | -3.976412 | 0.192395  | 4.999345  |
| H | -3.682211 | 1.650785  | 3.986025  |
| H | -5.291731 | 1.400615  | 4.770291  |
| C | -3.019320 | -4.007384 | 1.078319  |
| H | -2.743252 | -2.993799 | 1.433776  |
| C | -2.755666 | -1.815388 | -3.594805 |
| H | -2.436086 | -0.923859 | -3.017592 |
| C | -1.665019 | -2.046598 | -4.649417 |
| H | -0.706404 | -2.309841 | -4.154600 |
| H | -1.941037 | -2.857953 | -5.354097 |
| H | -1.511440 | -1.120396 | -5.242687 |
| C | -4.088725 | -1.450928 | -4.257079 |
| H | -4.430372 | -2.258110 | -4.939240 |
| H | -4.864775 | -1.286186 | -3.479640 |
| H | -3.980149 | -0.512793 | -4.842315 |
| C | -1.960992 | -4.954233 | 1.655409  |
| H | -2.182712 | -6.014259 | 1.413723  |
| H | -0.963588 | -4.691277 | 1.246909  |
| H | -1.923838 | -4.853823 | 2.760540  |
| C | -4.403459 | -4.302122 | 1.667334  |
| H | -5.154226 | -3.606273 | 1.235142  |
| H | -4.716301 | -5.346444 | 1.456051  |
| H | -4.388351 | -4.152961 | 2.768326  |
| C | -0.140173 | 1.661420  | -2.702283 |
| C | 0.646110  | 0.957943  | -3.625959 |
| H | 1.502183  | 1.448730  | -4.103773 |
| B | 0.105531  | 3.142751  | -2.358612 |
| O | 1.177424  | 3.859532  | -2.844360 |
| O | -0.752720 | 3.915881  | -1.615564 |
| C | 1.098945  | 5.205601  | -2.309413 |
| C | -0.400252 | 5.301445  | -1.849386 |
| C | 2.082031  | 5.303021  | -1.157846 |
| H | 3.095556  | 5.071402  | -1.511540 |
| H | 2.100908  | 6.311688  | -0.723785 |
| H | 1.838756  | 4.593479  | -0.358828 |
| C | 1.484478  | 6.180778  | -3.401530 |
| H | 1.363522  | 7.218721  | -3.059629 |
| H | 2.539164  | 6.041520  | -3.674390 |
| H | 0.883015  | 6.044141  | -4.307832 |
| C | -1.316199 | 5.815833  | -2.948247 |
| H | -1.123511 | 6.873184  | -3.174013 |
| H | -1.199964 | 5.239098  | -3.876129 |
| H | -2.361745 | 5.731865  | -2.627306 |

|    |           |           |           |
|----|-----------|-----------|-----------|
| C  | -0.623747 | 6.081971  | -0.573323 |
| H  | -0.090673 | 5.639144  | 0.274996  |
| H  | -0.291410 | 7.123837  | -0.685102 |
| H  | -1.693199 | 6.096861  | -0.324566 |
| Na | 2.786243  | -1.923363 | -0.306437 |
| H  | 0.278580  | 0.073710  | -4.149987 |
| H  | -1.120302 | 1.238772  | -2.441585 |
| H  | 2.150827  | -0.816323 | -2.210648 |
| O  | 4.511993  | -2.664090 | -1.613363 |
| O  | 1.388223  | -3.757433 | -0.430435 |
| C  | 5.031432  | -1.756508 | -2.529908 |
| H  | 4.670016  | -2.026150 | -3.546131 |
| H  | 4.673858  | -0.733580 | -2.289412 |
| C  | 5.540419  | -3.501509 | -1.194411 |
| H  | 5.704806  | -3.349905 | -0.106969 |
| H  | 5.247331  | -4.560475 | -1.358542 |
| C  | 6.808467  | -3.180100 | -1.959273 |
| H  | 7.705571  | -3.202039 | -1.302873 |
| H  | 6.937646  | -3.895134 | -2.801943 |
| C  | 6.542420  | -1.808819 | -2.488281 |
| H  | 6.933150  | -1.045750 | -1.780502 |
| H  | 6.990435  | -1.657358 | -3.494341 |
| C  | 1.029363  | -4.089710 | -1.729198 |
| H  | 0.217467  | -3.418342 | -2.078122 |
| H  | 1.908406  | -3.958006 | -2.398629 |
| C  | 1.835646  | -4.925803 | 0.172601  |
| H  | 2.943861  | -4.977110 | 0.092559  |
| H  | 1.564897  | -4.912347 | 1.249441  |
| C  | 1.200485  | -6.119137 | -0.519564 |
| H  | 0.432970  | -6.593640 | 0.130799  |
| H  | 1.972723  | -6.871411 | -0.792445 |
| C  | 0.564922  | -5.529418 | -1.746420 |
| H  | 0.894698  | -6.048739 | -2.672436 |
| H  | -0.541737 | -5.575502 | -1.665090 |

165

Figure\_S5\_imid-3\_modeS2\_ts(CuHadd)\_01 / electronic energy: -3525.629085258236 a.u. / lowest freq: -769.55 cm<sup>-1</sup>

|    |           |           |           |
|----|-----------|-----------|-----------|
| C  | 1.691595  | 0.440110  | 2.732392  |
| H  | 2.232837  | -0.387712 | 3.211027  |
| C  | 0.159449  | 0.209654  | 2.635551  |
| H  | -0.411922 | 1.038846  | 3.083066  |
| C  | 1.049811  | 0.400857  | 0.447349  |
| C  | 3.392484  | 0.820846  | 0.822150  |
| C  | 3.491988  | 1.888842  | -0.081122 |
| C  | 4.550911  | 0.088195  | 1.147196  |
| C  | 4.711264  | 2.252847  | -0.640866 |
| H  | 2.588966  | 2.451028  | -0.333836 |
| C  | 5.774459  | 0.483227  | 0.598365  |
| C  | 5.865302  | 1.559190  | -0.281440 |
| H  | 4.746017  | 3.085347  | -1.348349 |
| H  | 6.656142  | -0.109123 | 0.848824  |
| H  | 6.834440  | 1.838780  | -0.700341 |
| C  | -1.315836 | 0.009642  | 0.581832  |
| C  | -2.396739 | 0.826930  | 0.935412  |
| C  | -1.510275 | -1.048191 | -0.317866 |
| C  | -3.664876 | 0.588120  | 0.393366  |
| C  | -2.784188 | -1.301809 | -0.840756 |
| C  | -3.859217 | -0.478319 | -0.490633 |
| H  | -4.847234 | -0.677967 | -0.889643 |
| S  | 4.541880  | -1.460010 | 2.092865  |
| O  | 5.861942  | -2.066492 | 1.842279  |
| O  | 3.415204  | -2.226979 | 1.469114  |
| O  | 4.287499  | -1.116079 | 3.506148  |
| Cu | 1.231698  | 0.638243  | -1.438716 |
| C  | 2.036664  | 1.733257  | 3.432286  |
| C  | 2.823141  | 1.729042  | 4.597698  |
| C  | 1.583043  | 2.963208  | 2.920707  |
| C  | 3.161369  | 2.931700  | 5.226089  |
| H  | 3.173162  | 0.798328  | 5.024240  |
| C  | 1.925256  | 4.162838  | 3.549693  |
| H  | 0.960549  | 2.988096  | 2.036988  |
| C  | 2.716085  | 4.147426  | 4.700765  |
| H  | 3.769322  | 2.920891  | 6.121475  |
| H  | 1.575578  | 5.103950  | 3.145120  |
| H  | 2.980274  | 5.076926  | 5.188199  |
| C  | -0.299859 | -1.085508 | 3.259615  |
| C  | -1.243170 | -1.072702 | 4.302964  |
| C  | 0.164474  | -2.322003 | 2.775451  |
| C  | -1.705273 | -2.271791 | 4.853129  |
| H  | -1.628203 | -0.136371 | 4.686797  |
| C  | -0.291296 | -3.517636 | 3.336531  |
| H  | 0.867536  | -2.359968 | 1.956055  |
| C  | -1.228047 | -3.493082 | 4.372070  |
| H  | -2.435060 | -2.253757 | 5.652177  |
| H  | 0.072538  | -4.464707 | 2.960281  |
| H  | -1.587379 | -4.420603 | 4.798498  |
| N  | 2.093955  | 0.503590  | 1.301405  |
| N  | -0.053002 | 0.204034  | 1.180602  |
| H  | -0.682516 | -1.698288 | -0.571871 |

|    |           |           |           |
|----|-----------|-----------|-----------|
| H  | -2.254489 | 1.644388  | 1.631673  |
| C  | -3.013951 | -2.473361 | -1.705053 |
| C  | -2.973007 | -2.333620 | -3.119661 |
| C  | -3.327513 | -3.731664 | -1.119212 |
| C  | -3.248845 | -3.456888 | -3.920508 |
| C  | -3.597989 | -4.823780 | -1.963858 |
| C  | -3.554678 | -4.685891 | -3.346741 |
| H  | -3.235127 | -3.383615 | -4.999878 |
| H  | -3.845737 | -5.793307 | -1.552439 |
| H  | -3.765011 | -5.538408 | -3.979709 |
| C  | -4.805585 | 1.434077  | 0.783264  |
| C  | -5.532828 | 1.137277  | 1.969399  |
| C  | -5.188553 | 2.530899  | -0.037562 |
| C  | -6.629703 | 1.948860  | 2.311788  |
| C  | -6.297539 | 3.307572  | 0.344512  |
| C  | -7.005552 | 3.019348  | 1.506770  |
| H  | -7.205480 | 1.751203  | 3.206368  |
| H  | -6.620863 | 4.144557  | -0.260281 |
| H  | -7.855126 | 3.629812  | 1.784893  |
| C  | -4.437234 | 2.886708  | -1.321665 |
| H  | -3.571874 | 2.211825  | -1.480969 |
| C  | -3.854698 | 4.303611  | -1.252313 |
| H  | -3.209150 | 4.404071  | -0.353602 |
| H  | -3.232712 | 4.501618  | -2.151015 |
| H  | -4.656032 | 5.070475  | -1.207710 |
| C  | -5.338357 | 2.719045  | -2.550425 |
| H  | -5.750347 | 1.687596  | -2.579504 |
| H  | -6.180384 | 3.442727  | -2.534026 |
| H  | -4.750057 | 2.882516  | -3.478730 |
| C  | -5.167206 | -0.041232 | 2.874411  |
| H  | -4.287289 | -0.591848 | 2.484404  |
| C  | -6.306484 | -1.065406 | 2.936592  |
| H  | -5.983432 | -1.958470 | 3.513434  |
| H  | -7.207561 | -0.638098 | 3.424681  |
| H  | -6.574341 | -1.395942 | 1.910080  |
| C  | -4.775892 | 0.438421  | 4.277128  |
| H  | -4.423182 | -0.420127 | 4.887693  |
| H  | -3.948373 | 1.176649  | 4.206990  |
| H  | -5.635898 | 0.909164  | 4.798039  |
| C  | -3.398553 | -3.929906 | 0.396096  |
| H  | -3.158547 | -2.992837 | 0.938352  |
| C  | -2.654327 | -1.000251 | -3.794708 |
| H  | -2.414521 | -0.220054 | -3.044450 |
| C  | -1.418328 | -1.113485 | -4.695185 |
| H  | -0.558421 | -1.502554 | -4.109383 |
| H  | -1.602406 | -1.789791 | -5.555819 |
| H  | -1.146819 | -0.112534 | -5.092979 |
| C  | -3.863900 | -0.480187 | -4.579520 |
| H  | -4.112940 | -1.153065 | -5.427083 |
| H  | -4.746184 | -0.404767 | -3.908411 |
| H  | -3.648929 | 0.532538  | -4.982880 |
| C  | -2.368949 | -4.962648 | 0.868572  |
| H  | -2.556692 | -5.960561 | 0.420516  |
| H  | -1.347604 | -4.627308 | 0.590276  |
| H  | -2.411905 | -5.064468 | 1.973478  |
| C  | -4.814967 | -4.318499 | 0.835807  |
| H  | -5.543887 | -3.560571 | 0.476674  |
| H  | -5.102587 | -5.313826 | 0.436586  |
| H  | -4.872510 | -4.353549 | 1.944926  |
| C  | 0.431481  | 1.866867  | -2.884628 |
| C  | 1.466515  | 1.007328  | -3.410285 |
| H  | 2.454146  | 1.453774  | -3.586025 |
| B  | 0.645352  | 3.285302  | -2.405998 |
| O  | 1.878078  | 3.930633  | -2.319948 |
| O  | -0.393525 | 4.137340  | -2.055635 |
| C  | 1.650851  | 5.233441  | -1.737788 |
| C  | 0.134406  | 5.475443  | -2.044667 |
| C  | 1.918337  | 5.129925  | -0.245913 |
| H  | 2.947897  | 4.790395  | -0.066766 |
| H  | 1.791897  | 6.095362  | 0.263320  |
| H  | 1.231885  | 4.408768  | 0.217877  |
| C  | 2.592203  | 6.229615  | -2.379716 |
| H  | 2.382924  | 7.251085  | -2.029718 |
| H  | 3.633029  | 5.995417  | -2.115796 |
| H  | 2.513788  | 6.218358  | -3.473663 |
| C  | -0.093137 | 6.061102  | -3.430556 |
| H  | 0.220228  | 7.112607  | -3.492935 |
| H  | 0.450311  | 5.493776  | -4.199408 |
| H  | -1.163352 | 6.012456  | -3.672981 |
| C  | -0.597593 | 6.292892  | -1.001418 |
| H  | -0.602680 | 5.796981  | -0.023068 |
| H  | -0.138535 | 7.285422  | -0.884435 |
| H  | -1.642476 | 6.445546  | -1.303132 |
| Na | 2.575344  | -1.967118 | -0.561637 |
| H  | 1.213989  | 0.288296  | -4.195131 |
| H  | -0.603489 | 1.542576  | -3.048906 |
| H  | 2.036846  | -0.220459 | -2.528691 |
| O  | 4.324563  | -2.251752 | -2.002178 |

O 1.187102 -3.762926 -0.841443  
 C 4.840665 -1.191430 -2.740099  
 H 4.413641 -1.228505 -3.765718  
 H 4.543506 -0.230175 -2.271874  
 C 5.360429 -3.135404 -1.720202  
 H 5.585419 -3.089041 -0.634252  
 H 5.045641 -4.171116 -1.969503  
 C 6.586777 -2.748965 -2.518000  
 H 7.524091 -2.908911 -1.941907  
 H 6.620545 -3.326101 -3.468703  
 C 6.349436 -1.302699 -2.805133  
 H 6.814950 -0.676809 -2.012642  
 H 6.744832 -1.007844 -3.801410  
 C 0.701869 -4.101420 -2.096101  
 H -0.137458 -3.427174 -2.367438  
 H 1.512277 -3.976540 -2.848213  
 C 1.666820 -4.931378 -0.263516  
 H 2.765498 -4.994347 -0.426766  
 H 1.476381 -4.905156 0.830152  
 C 0.970115 -6.125066 -0.892461  
 H 0.261290 -6.594308 -0.175022  
 H 1.713279 -6.881248 -1.228099  
 C 0.231840 -5.539510 -2.062039  
 H 0.477011 -6.066278 -3.009877  
 H -0.863728 -5.582122 -1.883982

165

Figure\_S5\_imid-3\_modeS2\_ts(CuHadd)\_02 / electronic energy: -3525.627984592980 a.u. / lowest freq: -714.49 cm<sup>-1</sup>

C 2.067313 1.324238 2.350164  
 H 2.765913 0.557224 2.715921  
 C 0.584706 0.915595 2.519800  
 H -0.043610 1.762610 2.844524  
 C 1.132439 0.897140 0.224459  
 C 3.347756 1.803129 0.157477  
 C 3.175528 2.798178 -0.812814  
 C 4.604994 1.192908 0.301234  
 C 4.238188 3.221999 -1.603076  
 H 2.180767 3.227279 -0.951265  
 C 5.672668 1.644835 -0.480312  
 C 5.501434 2.660342 -1.418095  
 H 4.069514 3.992629 -2.359766  
 H 6.637060 1.145538 -0.367866  
 H 6.349000 2.991367 -2.022194  
 C -1.039957 0.013064 0.763331  
 C -2.224909 0.500172 1.335358  
 C -1.104162 -1.053333 -0.147536  
 C -3.457568 -0.075083 1.002465  
 C -2.334559 -1.645377 -0.461971  
 C -3.510672 -1.153711 0.113681  
 H -4.463231 -1.614078 -0.122202  
 S 4.868639 -0.293192 1.296068  
 O 6.033221 -0.953927 0.666058  
 O 3.598775 -1.063183 1.103671  
 O 5.079625 0.138067 2.691044  
 Cu 1.088867 0.890985 -1.679740  
 C 2.385551 2.650101 2.993659  
 C 3.300446 2.722755 4.058385  
 C 1.776568 3.832777 2.535060  
 C 3.606691 3.955246 4.643658  
 H 3.773746 1.827687 4.440588  
 C 2.086841 5.062673 3.120979  
 H 1.062930 3.799182 1.723770  
 C 3.002431 5.124263 4.174063  
 H 4.312729 4.003800 5.462547  
 H 1.616603 5.967691 2.758499  
 H 3.241714 6.077185 4.627996  
 C 0.402782 -0.231747 3.481159  
 C -0.204940 -0.014797 4.729937  
 C 0.827891 -1.530811 3.144634  
 C -0.377989 -1.074612 5.624928  
 H -0.541819 0.974409 5.013919  
 C 0.649441 -2.587525 4.041535  
 H 1.284579 -1.727495 2.184465  
 C 0.045950 -2.360037 5.280178  
 H -0.844620 -0.899375 6.585613  
 H 0.980743 -3.583009 3.777855  
 H -0.092049 -3.179516 5.973484  
 N 2.195569 1.402370 0.879254  
 N 0.216492 0.545477 1.140137  
 H -0.192171 -1.457180 -0.568667  
 H -2.195607 1.327309 2.032895  
 C -2.384041 -2.835005 -1.334848  
 C -2.828090 -2.718068 -2.682803  
 C -2.004721 -4.106068 -0.816228  
 C -2.876328 -3.874293 -3.483061  
 C -2.033572 -5.223408 -1.670490  
 C -2.467596 -5.106360 -2.985728  
 H -3.223653 -3.825036 -4.506417  
 H -1.732180 -6.199735 -1.314738

|    |           |           |           |
|----|-----------|-----------|-----------|
| H  | -2.495621 | -5.980561 | -3.623390 |
| C  | -4.701358 | 0.449177  | 1.594020  |
| C  | -5.138607 | -0.023476 | 2.862626  |
| C  | -5.469400 | 1.415324  | 0.886054  |
| C  | -6.334901 | 0.486472  | 3.399807  |
| C  | -6.653743 | 1.900060  | 1.470294  |
| C  | -7.078370 | 1.439690  | 2.712045  |
| H  | -6.701311 | 0.143342  | 4.358324  |
| H  | -7.260381 | 2.636844  | 0.960386  |
| H  | -7.995307 | 1.821005  | 3.142895  |
| C  | -5.054460 | 1.933800  | -0.491812 |
| H  | -4.110243 | 1.462350  | -0.831821 |
| C  | -4.782561 | 3.441785  | -0.459975 |
| H  | -4.003683 | 3.671119  | 0.298516  |
| H  | -4.411387 | 3.776886  | -1.451369 |
| H  | -5.702258 | 4.014654  | -0.218195 |
| C  | -6.105936 | 1.585233  | -1.552088 |
| H  | -6.305192 | 0.492520  | -1.542940 |
| H  | -7.058524 | 2.125455  | -1.369117 |
| H  | -5.733502 | 1.861605  | -2.561743 |
| C  | -4.362108 | -1.081054 | 3.648884  |
| H  | -3.431981 | -1.374016 | 3.120526  |
| C  | -5.183981 | -2.366369 | 3.800276  |
| H  | -4.571863 | -3.153768 | 4.290115  |
| H  | -6.092955 | -2.193681 | 4.414238  |
| H  | -5.469947 | -2.739757 | 2.799372  |
| C  | -3.919168 | -0.544776 | 5.015445  |
| H  | -3.292791 | -1.301261 | 5.533650  |
| H  | -3.314098 | 0.377471  | 4.882253  |
| H  | -4.790420 | -0.314180 | 5.663354  |
| C  | -1.587246 | -4.301082 | 0.643101  |
| H  | -1.671434 | -3.356692 | 1.217615  |
| C  | -3.270921 | -1.383539 | -3.283879 |
| H  | -3.103125 | -0.550130 | -2.571977 |
| C  | -2.461694 | -1.030549 | -4.539192 |
| H  | -1.376587 | -1.056726 | -4.312101 |
| H  | -2.670982 | -1.734060 | -5.371682 |
| H  | -2.718324 | -0.004467 | -4.879356 |
| C  | -4.772643 | -1.399072 | -3.589824 |
| H  | -5.014490 | -2.148109 | -4.373297 |
| H  | -5.344549 | -1.645541 | -2.669940 |
| H  | -5.099672 | -0.398406 | -3.944529 |
| C  | -0.120996 | -4.732533 | 0.741265  |
| H  | 0.051417  | -5.703503 | 0.231360  |
| H  | 0.526826  | -3.959605 | 0.278265  |
| H  | 0.175317  | -4.837951 | 1.805602  |
| C  | -2.506883 | -5.298245 | 1.359321  |
| H  | -3.566046 | -4.978269 | 1.256545  |
| H  | -2.396360 | -6.322242 | 0.945116  |
| H  | -2.260045 | -5.331213 | 2.442255  |
| C  | -0.148423 | 1.701706  | -3.114915 |
| C  | 1.009640  | 1.046133  | -3.685282 |
| H  | 1.811297  | 1.685606  | -4.076975 |
| B  | -0.251704 | 3.173917  | -2.790739 |
| O  | 0.791822  | 4.098449  | -2.864926 |
| O  | -1.443322 | 3.796112  | -2.429018 |
| C  | 0.296131  | 5.354764  | -2.355064 |
| C  | -1.245683 | 5.214207  | -2.573852 |
| C  | 0.650924  | 5.436683  | -0.879182 |
| H  | 1.740009  | 5.379647  | -0.747807 |
| H  | 0.314697  | 6.379768  | -0.426690 |
| H  | 0.189861  | 4.607296  | -0.323253 |
| C  | 0.942449  | 6.488279  | -3.121475 |
| H  | 0.518417  | 7.458214  | -2.822566 |
| H  | 2.021519  | 6.520333  | -2.915960 |
| H  | 0.811729  | 6.374883  | -4.204584 |
| C  | -1.666292 | 5.590706  | -3.986812 |
| H  | -1.610986 | 6.674803  | -4.158856 |
| H  | -1.038317 | 5.090618  | -4.737707 |
| H  | -2.704763 | 5.274276  | -4.153570 |
| C  | -2.093441 | 5.949420  | -1.557315 |
| H  | -1.957514 | 5.546525  | -0.546196 |
| H  | -1.844807 | 7.020640  | -1.539539 |
| H  | -3.158269 | 5.864713  | -1.811544 |
| Na | 3.183538  | -1.799278 | -0.991210 |
| H  | 0.850032  | 0.175333  | -4.330414 |
| H  | -1.078649 | 1.121643  | -3.092486 |
| H  | 2.016846  | 0.173622  | -2.771507 |
| O  | 2.296113  | -2.845992 | -2.906120 |
| O  | 3.225119  | -3.955322 | -0.181769 |
| C  | 0.928276  | -3.037269 | -3.037899 |
| H  | 0.570201  | -3.740377 | -2.258717 |
| H  | 0.407665  | -2.064283 | -2.904088 |
| C  | 2.816432  | -2.655415 | -4.182341 |
| H  | 3.132745  | -1.596504 | -4.299382 |
| H  | 3.711037  | -3.302893 | -4.303824 |
| C  | 1.770388  | -3.015682 | -5.224980 |
| H  | 1.425063  | -2.100459 | -5.755152 |

H 2.158965 -3.752128 -5.961911  
 C 0.654068 -3.593786 -4.413395  
 H -0.341177 -3.285646 -4.797397  
 H 0.727583 -4.703741 -4.393912  
 C 3.268098 -5.139830 -0.910043  
 H 2.248696 -5.364560 -1.290323  
 H 3.947761 -5.018350 -1.780422  
 C 3.564807 -4.238339 1.136201  
 H 4.590645 -3.858168 1.333697  
 H 2.858821 -3.727347 1.823675  
 C 3.518146 -5.733808 1.354618  
 H 2.512739 -6.035236 1.723049  
 H 4.301303 -6.073580 2.066687  
 C 3.742883 -6.271516 -0.020956  
 H 4.827626 -6.456847 -0.185314  
 H 3.167732 -7.206630 -0.196946

165

Figure\_S5\_imid-3\_modeS2\_ts(CuHadd)\_03 / electronic energy: -3525.628301013297 a.u. / lowest freq: -756.56 cm-1

C 1.766908 0.294954 2.779292  
 H 2.115560 -0.659505 3.199906  
 C 0.225923 0.376995 2.642655  
 H -0.166033 1.359869 2.955871  
 C 1.183870 0.309676 0.483048  
 C 3.546675 0.444804 0.907564  
 C 3.852051 1.480694 0.015318  
 C 4.539370 -0.495673 1.235679  
 C 5.129399 1.618866 -0.516409  
 H 3.062133 2.182874 -0.262855  
 C 5.827416 -0.329314 0.717109  
 C 6.130947 0.723752 -0.143099  
 H 5.333901 2.431625 -1.217999  
 H 6.579211 -1.080387 0.967039  
 H 7.142739 0.825946 -0.541327  
 C -1.211875 0.181092 0.556933  
 C -2.178772 1.162255 0.815411  
 C -1.526318 -0.900895 -0.276756  
 C -3.453166 1.059973 0.244130  
 C -2.808822 -1.016270 -0.825302  
 C -3.768479 -0.031284 -0.572029  
 H -4.763701 -0.124256 -0.991769  
 S 4.202156 -2.018182 2.154501  
 O 5.285775 -2.940154 1.761684  
 O 2.860600 -2.440103 1.634858  
 O 4.175189 -1.667627 3.587634  
 Cu 1.482031 0.454847 -1.398851  
 C 2.338939 1.438887 3.579088  
 C 2.994158 1.199123 4.799469  
 C 2.225378 2.762191 3.114747  
 C 3.537221 2.260449 5.530331  
 H 3.080689 0.194122 5.190833  
 C 2.771359 3.819846 3.846347  
 H 1.713429 2.970760 2.186174  
 C 3.428715 3.569071 5.052930  
 H 4.041625 2.068081 6.468411  
 H 2.683428 4.833776 3.477807  
 H 3.850616 4.388809 5.619849  
 C -0.502583 -0.706324 3.398025  
 C -1.389128 -0.370845 4.436671  
 C -0.344300 -2.059675 3.046377  
 C -2.098153 -1.369542 5.110846  
 H -1.536521 0.662923 4.722983  
 C -1.051190 -3.054534 3.726928  
 H 0.313249 -2.341641 2.235755  
 C -1.929814 -2.709859 4.756054  
 H -2.779870 -1.103902 5.908291  
 H -0.923899 -4.093208 3.451952  
 H -2.481239 -3.481346 5.277595  
 N 2.205701 0.366371 1.363196  
 N 0.047948 0.233897 1.189933  
 H -0.789453 -1.673965 -0.458254  
 H -1.944551 2.000427 1.460011  
 C -3.177100 -2.211368 -1.603667  
 C -2.968412 -2.238339 -3.009830  
 C -3.771407 -3.324513 -0.945766  
 C -3.355661 -3.383162 -3.730287  
 C -4.146000 -4.443086 -1.712015  
 C -3.934877 -4.471132 -3.086203  
 H -3.215709 -3.436046 -4.801838  
 H -4.603689 -5.305064 -1.244902  
 H -4.227047 -5.342491 -3.658053  
 C -4.476973 2.082151 0.523266  
 C -5.255134 2.000180 1.711654  
 C -4.715132 3.121248 -0.418828  
 C -6.258072 2.961978 1.931945  
 C -5.736974 4.052058 -0.157073  
 C -6.494915 3.972837 1.006401  
 H -6.871201 2.927355 2.822836  
 H -5.953159 4.847549 -0.857948

|    |           |           |           |
|----|-----------|-----------|-----------|
| H  | -7.275510 | 4.699757  | 1.190970  |
| C  | -3.900760 | 3.252940  | -1.706948 |
| H  | -3.098707 | 2.488392  | -1.755141 |
| C  | -3.187097 | 4.608194  | -1.779402 |
| H  | -2.568815 | 4.757610  | -0.868586 |
| H  | -2.516130 | 4.636778  | -2.664314 |
| H  | -3.910668 | 5.445535  | -1.865111 |
| C  | -4.783071 | 3.025998  | -2.939576 |
| H  | -5.282483 | 2.035837  | -2.870090 |
| H  | -5.559019 | 3.815294  | -3.029335 |
| H  | -4.160731 | 3.034979  | -3.859995 |
| C  | -5.049810 | 0.890613  | 2.744813  |
| H  | -4.227167 | 0.209250  | 2.447489  |
| C  | -6.299376 | 0.010467  | 2.865571  |
| H  | -6.095624 | -0.848055 | 3.540907  |
| H  | -7.158688 | 0.583223  | 3.273419  |
| H  | -6.575687 | -0.393011 | 1.867860  |
| C  | -4.646800 | 1.469631  | 4.106274  |
| H  | -4.421943 | 0.647044  | 4.817591  |
| H  | -3.733711 | 2.093165  | 3.996664  |
| H  | -5.458480 | 2.091474  | 4.538481  |
| C  | -4.026226 | -3.337935 | 0.563244  |
| H  | -3.675257 | -2.400708 | 1.040803  |
| C  | -2.352934 | -1.058858 | -3.762195 |
| H  | -2.082028 | -0.237835 | -3.067896 |
| C  | -1.051790 | -1.465263 | -4.464687 |
| H  | -0.325723 | -1.857365 | -3.720525 |
| H  | -1.231570 | -2.241701 | -5.237098 |
| H  | -0.599429 | -0.581496 | -4.961906 |
| C  | -3.354072 | -0.458468 | -4.756079 |
| H  | -3.601561 | -1.179113 | -5.563771 |
| H  | -4.288872 | -0.174431 | -4.226702 |
| H  | -2.927908 | 0.457420  | -5.218770 |
| C  | -3.251223 | -4.468942 | 1.248414  |
| H  | -3.586327 | -5.465714 | 0.893156  |
| H  | -2.166245 | -4.356929 | 1.042500  |
| H  | -3.401259 | -4.420999 | 2.348010  |
| C  | -5.525713 | -3.430660 | 0.868477  |
| H  | -6.067484 | -2.606130 | 0.357350  |
| H  | -5.946424 | -4.401621 | 0.532265  |
| H  | -5.698035 | -3.331398 | 1.961689  |
| C  | 0.904730  | 1.711089  | -2.932231 |
| C  | 1.888646  | 0.740951  | -3.352501 |
| H  | 2.926024  | 1.083671  | -3.461687 |
| B  | 1.216285  | 3.116745  | -2.469713 |
| O  | 2.493361  | 3.633678  | -2.249448 |
| O  | 0.241897  | 4.085846  | -2.266202 |
| C  | 2.332805  | 4.955296  | -1.689433 |
| C  | 0.909073  | 5.358547  | -2.194921 |
| C  | 2.379332  | 4.829224  | -0.175284 |
| H  | 3.336187  | 4.390250  | 0.138907  |
| H  | 2.283621  | 5.804012  | 0.322830  |
| H  | 1.566087  | 4.181410  | 0.182928  |
| C  | 3.453983  | 5.843374  | -2.183782 |
| H  | 3.301258  | 6.883868  | -1.861427 |
| H  | 4.416622  | 5.507357  | -1.773847 |
| H  | 3.533331  | 5.830151  | -3.277566 |
| C  | 0.936133  | 5.939361  | -3.600886 |
| H  | 1.377163  | 6.945809  | -3.621052 |
| H  | 1.508585  | 5.299451  | -4.287210 |
| H  | -0.090291 | 6.010659  | -3.985246 |
| C  | 0.147606  | 6.275980  | -1.262157 |
| H  | -0.048386 | 5.801934  | -0.292731 |
| H  | 0.705836  | 7.207153  | -1.085995 |
| H  | -0.820280 | 6.550026  | -1.702854 |
| Na | 2.249101  | -2.470818 | -0.499340 |
| H  | 1.624109  | 0.024081  | -4.135404 |
| H  | -0.139796 | 1.482197  | -3.179105 |
| H  | 2.281518  | -0.512342 | -2.391983 |
| O  | 3.798221  | -3.028603 | -2.158982 |
| O  | 0.626454  | -4.078766 | -0.519140 |
| C  | 3.360224  | -3.164588 | -3.473949 |
| H  | 3.402049  | -4.239366 | -3.753185 |
| H  | 2.305304  | -2.824402 | -3.555608 |
| C  | 4.898548  | -2.178847 | -2.158854 |
| H  | 4.577490  | -1.173690 | -1.812152 |
| H  | 5.671962  | -2.564313 | -1.461314 |
| C  | 5.451467  | -2.080394 | -3.560888 |
| H  | 5.881587  | -1.075996 | -3.766818 |
| H  | 6.221097  | -2.867351 | -3.722769 |
| C  | 4.248394  | -2.357344 | -4.401952 |
| H  | 3.748122  | -1.402909 | -4.677657 |
| H  | 4.511341  | -2.924133 | -5.321566 |
| C  | 0.056743  | -4.596112 | -1.674105 |
| H  | -0.674342 | -3.871312 | -2.087561 |
| H  | 0.855402  | -4.762775 | -2.429432 |
| C  | 0.787166  | -5.122462 | 0.387228  |
| H  | 1.870160  | -5.288677 | 0.571311  |

|   |           |           |           |
|---|-----------|-----------|-----------|
| H | 0.311339  | -4.838047 | 1.348985  |
| C | 0.143119  | -6.385832 | -0.155882 |
| H | -0.525576 | -6.862355 | 0.594115  |
| H | 0.926244  | -7.109016 | -0.474392 |
| C | -0.625055 | -5.902682 | -1.344562 |
| H | -0.575454 | -6.619438 | -2.192776 |
| H | -1.684468 | -5.721172 | -1.065412 |

165

Figure\_S5\_imid-3\_modeS2\_ts(CuHadd)\_04 / electronic energy: -3525.628301013864 a.u. / lowest freq: -756.50 cm-1

|    |           |           |           |
|----|-----------|-----------|-----------|
| C  | 1.766908  | 0.294955  | 2.779292  |
| H  | 2.115559  | -0.659505 | 3.199905  |
| C  | 0.225923  | 0.376996  | 2.642655  |
| H  | -0.166032 | 1.359870  | 2.955871  |
| C  | 1.183871  | 0.309677  | 0.483048  |
| C  | 3.546675  | 0.444805  | 0.907564  |
| C  | 3.852051  | 1.480695  | 0.015318  |
| C  | 4.539370  | -0.495672 | 1.235678  |
| C  | 5.129399  | 1.618867  | -0.516410 |
| H  | 3.062133  | 2.182875  | -0.262855 |
| C  | 5.827415  | -0.329313 | 0.717108  |
| C  | 6.130947  | 0.723753  | -0.143100 |
| H  | 5.333901  | 2.431626  | -1.218000 |
| H  | 6.579210  | -1.080387 | 0.967037  |
| H  | 7.142739  | 0.825947  | -0.541328 |
| C  | -1.211874 | 0.181093  | 0.556932  |
| C  | -2.178773 | 1.162256  | 0.815411  |
| C  | -1.526317 | -0.900894 | -0.276757 |
| C  | -3.453166 | 1.059973  | 0.244130  |
| C  | -2.808821 | -1.016269 | -0.825303 |
| C  | -3.768478 | -0.031283 | -0.572029 |
| H  | -4.763700 | -0.124256 | -0.991770 |
| S  | 4.202155  | -2.018182 | 2.154500  |
| O  | 5.285775  | -2.940154 | 1.761682  |
| O  | 2.860599  | -2.440102 | 1.634856  |
| O  | 4.175189  | -1.667627 | 3.587633  |
| Cu | 1.482031  | 0.454848  | -1.398851 |
| C  | 2.338939  | 1.438887  | 3.579088  |
| C  | 2.994157  | 1.199122  | 4.799469  |
| C  | 2.225379  | 2.762190  | 3.114748  |
| C  | 3.537221  | 2.260447  | 5.530333  |
| H  | 3.080688  | 0.194120  | 5.190833  |
| C  | 2.771360  | 3.819845  | 3.846349  |
| H  | 1.713430  | 2.970760  | 2.186175  |
| C  | 3.428715  | 3.569070  | 5.052932  |
| H  | 4.041624  | 2.068078  | 6.468412  |
| H  | 2.683430  | 4.833776  | 3.477809  |
| H  | 3.850616  | 4.388806  | 5.619852  |
| C  | -0.502583 | -0.706322 | 3.398024  |
| C  | -1.389128 | -0.370844 | 4.436671  |
| C  | -0.344301 | -2.059674 | 3.046376  |
| C  | -2.098153 | -1.369541 | 5.110845  |
| H  | -1.536520 | 0.662924  | 4.722983  |
| C  | -1.051191 | -3.054533 | 3.726926  |
| H  | 0.313248  | -2.341639 | 2.235754  |
| C  | -1.929815 | -2.709857 | 4.756053  |
| H  | -2.779870 | -1.103901 | 5.908291  |
| H  | -0.923900 | -4.093207 | 3.451951  |
| H  | -2.481240 | -3.481344 | 5.277594  |
| N  | 2.205701  | 0.366372  | 1.363196  |
| N  | 0.047949  | 0.233899  | 1.189933  |
| H  | -0.789452 | -1.673964 | -0.458255 |
| H  | -1.944552 | 2.000428  | 1.460011  |
| C  | -3.177098 | -2.211367 | -1.603669 |
| C  | -2.968409 | -2.238337 | -3.009832 |
| C  | -3.771405 | -3.324512 | -0.945769 |
| C  | -3.355657 | -3.383161 | -3.730290 |
| C  | -4.145997 | -4.443085 | -1.712019 |
| C  | -3.934874 | -4.471131 | -3.086206 |
| H  | -3.215705 | -3.436044 | -4.801840 |
| H  | -4.603686 | -5.305063 | -1.244905 |
| H  | -4.227043 | -5.342490 | -3.658056 |
| C  | -4.476974 | 2.082150  | 0.523266  |
| C  | -5.255136 | 2.000177  | 1.711654  |
| C  | -4.715133 | 3.121248  | -0.418826 |
| C  | -6.258074 | 2.961975  | 1.931945  |
| C  | -5.736975 | 4.052058  | -0.157071 |
| C  | -6.494917 | 3.972835  | 1.006402  |
| H  | -6.871204 | 2.927350  | 2.822836  |
| H  | -5.953160 | 4.847550  | -0.857945 |
| H  | -7.275512 | 4.699754  | 1.190972  |
| C  | -3.900760 | 3.252942  | -1.706946 |
| H  | -3.098707 | 2.488394  | -1.755140 |
| C  | -3.187097 | 4.608196  | -1.779397 |
| H  | -2.568814 | 4.757610  | -0.868581 |
| H  | -2.516130 | 4.636781  | -2.664309 |
| H  | -3.910668 | 5.445537  | -1.865104 |
| C  | -4.783070 | 3.026002  | -2.939575 |
| H  | -5.282483 | 2.035842  | -2.870091 |



|    |           |           |           |
|----|-----------|-----------|-----------|
| H  | -5.559018 | 3.815299  | -3.029333 |
| H  | -4.160730 | 3.034985  | -3.859993 |
| C  | -5.049812 | 0.890609  | 2.744811  |
| H  | -4.227168 | 0.209247  | 2.447487  |
| C  | -6.299377 | 0.010463  | 2.865567  |
| H  | -6.095625 | -0.848060 | 3.540902  |
| H  | -7.158690 | 0.583218  | 3.273416  |
| H  | -6.575688 | -0.393014 | 1.867855  |
| C  | -4.646803 | 1.469625  | 4.106273  |
| H  | -4.421946 | 0.647038  | 4.817590  |
| H  | -3.733714 | 2.093160  | 3.996665  |
| H  | -5.458484 | 2.091468  | 4.538481  |
| C  | -4.026225 | -3.337935 | 0.563242  |
| H  | -3.675258 | -2.400708 | 1.040801  |
| C  | -2.352932 | -1.058856 | -3.762196 |
| H  | -2.082027 | -0.237832 | -3.067897 |
| C  | -1.051787 | -1.465260 | -4.464688 |
| H  | -0.325720 | -1.857361 | -3.720525 |
| H  | -1.231566 | -2.241697 | -5.237099 |
| H  | -0.599427 | -0.581492 | -4.961906 |
| C  | -3.354070 | -0.458466 | -4.756080 |
| H  | -3.601558 | -1.179111 | -5.563773 |
| H  | -4.288870 | -0.174430 | -4.226704 |
| H  | -2.927906 | 0.457423  | -5.218771 |
| C  | -3.251222 | -4.468942 | 1.248412  |
| H  | -3.586324 | -5.465714 | 0.893153  |
| H  | -2.166244 | -4.356928 | 1.042499  |
| H  | -3.401259 | -4.420999 | 2.348008  |
| C  | -5.525712 | -3.430661 | 0.868473  |
| H  | -6.067484 | -2.606131 | 0.357346  |
| H  | -5.946423 | -4.401622 | 0.532261  |
| H  | -5.698036 | -3.331399 | 1.961685  |
| C  | 0.904730  | 1.711090  | -2.932231 |
| C  | 1.888647  | 0.740952  | -3.352501 |
| H  | 2.926025  | 1.083673  | -3.461686 |
| B  | 1.216286  | 3.116746  | -2.469713 |
| O  | 2.493361  | 3.633679  | -2.249448 |
| O  | 0.241897  | 4.085847  | -2.266199 |
| C  | 2.332806  | 4.955297  | -1.689432 |
| C  | 0.909073  | 5.358547  | -2.194919 |
| C  | 2.379333  | 4.829224  | -0.175283 |
| H  | 3.336189  | 4.390250  | 0.138906  |
| H  | 2.283623  | 5.804011  | 0.322831  |
| H  | 1.566090  | 4.181410  | 0.182929  |
| C  | 3.453983  | 5.843375  | -2.183782 |
| H  | 3.301258  | 6.883869  | -1.861426 |
| H  | 4.416622  | 5.507358  | -1.773848 |
| H  | 3.533330  | 5.830152  | -3.277566 |
| C  | 0.936131  | 5.939362  | -3.600883 |
| H  | 1.377161  | 6.945810  | -3.621049 |
| H  | 1.508583  | 5.299453  | -4.287209 |
| H  | -0.090293 | 6.010660  | -3.985243 |
| C  | 0.147606  | 6.275980  | -1.262154 |
| H  | -0.048384 | 5.801933  | -0.292728 |
| H  | 0.705837  | 7.207152  | -1.085991 |
| H  | -0.820280 | 6.550026  | -1.702850 |
| Na | 2.249099  | -2.470821 | -0.499341 |
| H  | 1.624111  | 0.024083  | -4.135405 |
| H  | -0.139796 | 1.482198  | -3.179105 |
| H  | 2.281518  | -0.512341 | -2.391984 |
| O  | 3.798222  | -3.028609 | -2.158982 |
| O  | 0.626453  | -4.078768 | -0.519137 |
| C  | 3.360226  | -3.164593 | -3.473950 |
| H  | 3.402057  | -4.239370 | -3.753188 |
| H  | 2.305304  | -2.824413 | -3.555608 |
| C  | 4.898545  | -2.178847 | -2.158853 |
| H  | 4.577483  | -1.173693 | -1.812147 |
| H  | 5.671961  | -2.564313 | -1.461314 |
| C  | 5.451463  | -2.080388 | -3.560887 |
| H  | 5.881577  | -1.075987 | -3.766814 |
| H  | 6.221098  | -2.867340 | -3.722770 |
| C  | 4.248392  | -2.357342 | -4.401951 |
| H  | 3.748115  | -1.402909 | -4.677654 |
| H  | 4.511341  | -2.924128 | -5.321566 |
| C  | 0.056743  | -4.596116 | -1.674102 |
| H  | -0.674340 | -3.871316 | -2.087560 |
| H  | 0.855403  | -4.762781 | -2.429428 |
| C  | 0.787168  | -5.122464 | 0.387231  |
| H  | 1.870161  | -5.288680 | 0.571309  |
| H  | 0.311344  | -4.838048 | 1.348990  |
| C  | 0.143116  | -6.385834 | -0.155875 |
| H  | -0.525581 | -6.862352 | 0.594123  |
| H  | 0.926239  | -7.109021 | -0.474383 |
| C  | -0.625056 | -5.902684 | -1.344557 |
| H  | -0.575455 | -6.619443 | -2.192770 |
| H  | -1.684469 | -5.721174 | -1.065410 |

165

Figure\_S5\_imid-3\_modeS2\_ts(CuHadd)\_05 / electronic energy: -3525.630337045497 a.u. / lowest freq: -635.75 cm<sup>-1</sup>

|    |           |           |           |
|----|-----------|-----------|-----------|
| C  | 1.501521  | 0.911246  | 2.707495  |
| H  | 2.123668  | 0.194166  | 3.260423  |
| C  | 0.013038  | 0.482229  | 2.615197  |
| H  | -0.667796 | 1.270811  | 2.975569  |
| C  | 0.925954  | 0.581169  | 0.428175  |
| C  | 3.183314  | 1.333591  | 0.802735  |
| C  | 3.196679  | 2.302176  | -0.211683 |
| C  | 4.410503  | 0.810456  | 1.253927  |
| C  | 4.389667  | 2.776090  | -0.745557 |
| H  | 2.244594  | 2.702836  | -0.571275 |
| C  | 5.604639  | 1.317826  | 0.732095  |
| C  | 5.604025  | 2.303060  | -0.251510 |
| H  | 4.358670  | 3.526471  | -1.539765 |
| H  | 6.542121  | 0.884533  | 1.084470  |
| H  | 6.549986  | 2.677955  | -0.647818 |
| C  | -1.374421 | -0.100291 | 0.575314  |
| C  | -2.564874 | 0.582762  | 0.854327  |
| C  | -1.406275 | -1.247355 | -0.229803 |
| C  | -3.778997 | 0.120590  | 0.333047  |
| C  | -2.623869 | -1.725831 | -0.728306 |
| C  | -3.809200 | -1.036468 | -0.452836 |
| H  | -4.753495 | -1.408273 | -0.833959 |
| S  | 4.543215  | -0.626834 | 2.336291  |
| O  | 5.907618  | -1.170947 | 2.073416  |
| O  | 3.506379  | -1.572465 | 1.822889  |
| O  | 4.334373  | -0.177886 | 3.723559  |
| Cu | 1.117384  | 0.660213  | -1.468735 |
| C  | 1.665711  | 2.287286  | 3.308673  |
| C  | 2.422027  | 2.473561  | 4.478993  |
| C  | 1.066171  | 3.405202  | 2.700201  |
| C  | 2.591175  | 3.754231  | 5.014742  |
| H  | 2.877159  | 1.631124  | 4.981829  |
| C  | 1.239200  | 4.683544  | 3.236566  |
| H  | 0.458540  | 3.280160  | 1.814989  |
| C  | 2.004098  | 4.858599  | 4.391902  |
| H  | 3.177298  | 3.890287  | 5.914392  |
| H  | 0.777779  | 5.537525  | 2.757541  |
| H  | 2.137149  | 5.848863  | 4.807878  |
| C  | -0.295146 | -0.795551 | 3.356913  |
| C  | -1.237922 | -0.800511 | 4.400578  |
| C  | 0.314586  | -2.006093 | 2.983394  |
| C  | -1.557024 | -1.991955 | 5.058830  |
| H  | -1.731444 | 0.114801  | 4.702081  |
| C  | 0.001350  | -3.192420 | 3.650777  |
| H  | 1.018329  | -2.032414 | 2.165261  |
| C  | -0.936566 | -3.186568 | 4.685618  |
| H  | -2.286715 | -1.988937 | 5.858139  |
| H  | 0.477856  | -4.118790 | 3.357289  |
| H  | -1.185255 | -4.108205 | 5.195500  |
| N  | 1.919766  | 0.914662  | 1.282300  |
| N  | -0.161059 | 0.314309  | 1.165211  |
| H  | -0.492413 | -1.791110 | -0.425352 |
| H  | -2.549677 | 1.468714  | 1.477199  |
| C  | -2.670611 | -2.988341 | -1.488444 |
| C  | -2.630280 | -2.965461 | -2.909894 |
| C  | -2.803897 | -4.225291 | -0.796721 |
| C  | -2.722263 | -4.181595 | -3.611095 |
| C  | -2.893703 | -5.413668 | -1.544551 |
| C  | -2.848218 | -5.389254 | -2.933898 |
| H  | -2.705116 | -4.199292 | -4.692755 |
| H  | -3.009767 | -6.370088 | -1.052376 |
| H  | -2.920969 | -6.314260 | -3.491409 |
| C  | -5.032166 | 0.829358  | 0.642460  |
| C  | -5.730060 | 0.538287  | 1.847506  |
| C  | -5.551248 | 1.785040  | -0.274520 |
| C  | -6.936989 | 1.211631  | 2.110120  |
| C  | -6.766081 | 2.425447  | 0.030668  |
| C  | -7.446800 | 2.142018  | 1.210286  |
| H  | -7.494683 | 1.013331  | 3.015942  |
| H  | -7.194277 | 3.150982  | -0.648355 |
| H  | -8.379413 | 2.646568  | 1.428135  |
| C  | -4.834546 | 2.131258  | -1.581087 |
| H  | -3.877424 | 1.578332  | -1.672937 |
| C  | -4.464938 | 3.618858  | -1.637674 |
| H  | -3.858249 | 3.891853  | -0.748071 |
| H  | -3.861126 | 3.825749  | -2.546839 |
| H  | -5.369647 | 4.261335  | -1.667472 |
| C  | -5.678658 | 1.725235  | -2.794524 |
| H  | -5.936840 | 0.646429  | -2.731823 |
| H  | -6.616616 | 2.317125  | -2.848593 |
| H  | -5.102883 | 1.889100  | -3.730529 |
| C  | -5.216165 | -0.490184 | 2.857432  |
| H  | -4.259034 | -0.940340 | 2.524117  |
| C  | -6.198283 | -1.658150 | 3.005720  |
| H  | -5.760817 | -2.441479 | 3.661235  |
| H  | -7.159331 | -1.323720 | 3.449931  |
| H  | -6.398909 | -2.112228 | 2.011656  |
| C  | -4.924124 | 0.163424  | 4.213320  |

|    |           |           |           |
|----|-----------|-----------|-----------|
| H  | -4.464743 | -0.577882 | 4.901474  |
| H  | -4.209137 | 1.003710  | 4.081775  |
| H  | -5.852161 | 0.550110  | 4.684216  |
| C  | -2.882877 | -4.301145 | 0.729209  |
| H  | -2.746167 | -3.301830 | 1.190343  |
| C  | -2.510676 | -1.661790 | -3.697814 |
| H  | -2.395215 | -0.793740 | -3.018048 |
| C  | -1.266587 | -1.664446 | -4.593951 |
| H  | -0.363714 | -1.882381 | -3.985201 |
| H  | -1.347312 | -2.422697 | -5.400492 |
| H  | -1.139021 | -0.667465 | -5.066943 |
| C  | -3.779687 | -1.398270 | -4.516019 |
| H  | -3.920174 | -2.171768 | -5.300350 |
| H  | -4.667306 | -1.398258 | -3.847761 |
| H  | -3.716291 | -0.403534 | -5.006904 |
| C  | -1.768650 | -5.183690 | 1.305467  |
| H  | -1.872503 | -6.238838 | 0.977904  |
| H  | -0.777739 | -4.801481 | 0.982274  |
| H  | -1.805284 | -5.162939 | 2.415131  |
| C  | -4.263160 | -4.791780 | 1.180258  |
| H  | -5.054295 | -4.135997 | 0.757447  |
| H  | -4.446096 | -5.836100 | 0.849904  |
| H  | -4.338049 | -4.752366 | 2.288190  |
| C  | 0.125268  | 1.671434  | -2.972931 |
| C  | 1.263249  | 0.922971  | -3.450713 |
| H  | 2.177307  | 1.485920  | -3.680915 |
| B  | 0.153410  | 3.136267  | -2.605774 |
| O  | 1.290126  | 3.945801  | -2.619173 |
| O  | -0.979172 | 3.872468  | -2.276050 |
| C  | 0.911374  | 5.245672  | -2.120710 |
| C  | -0.633735 | 5.264818  | -2.377770 |
| C  | 1.239943  | 5.290846  | -0.638487 |
| H  | 2.310279  | 5.100036  | -0.482452 |
| H  | 1.006688  | 6.267217  | -0.191740 |
| H  | 0.672185  | 4.522512  | -0.097775 |
| C  | 1.693250  | 6.305170  | -2.867368 |
| H  | 1.364317  | 7.314568  | -2.579763 |
| H  | 2.763060  | 6.224785  | -2.628613 |
| H  | 1.586841  | 6.204337  | -3.954249 |
| C  | -0.983589 | 5.717473  | -3.788161 |
| H  | -0.808569 | 6.793011  | -3.931705 |
| H  | -0.398552 | 5.170155  | -4.540827 |
| H  | -2.046588 | 5.518137  | -3.980422 |
| C  | -1.434534 | 6.050428  | -1.360492 |
| H  | -1.336237 | 5.629934  | -0.352153 |
| H  | -1.112959 | 7.101718  | -1.330303 |
| H  | -2.500430 | 6.037357  | -1.625056 |
| Na | 5.012835  | -2.929338 | 0.642636  |
| H  | 1.110748  | 0.108491  | -4.164106 |
| H  | -0.856674 | 1.191427  | -3.069804 |
| H  | 2.041024  | -0.175823 | -2.456806 |
| O  | 5.745516  | -1.806398 | -1.309220 |
| O  | 3.263747  | -3.986902 | -0.512548 |
| C  | 6.378731  | -2.495723 | -2.337973 |
| H  | 7.417941  | -2.117594 | -2.450059 |
| H  | 6.425508  | -3.573258 | -2.071265 |
| C  | 4.810554  | -0.960132 | -1.888946 |
| H  | 3.936759  | -0.854636 | -1.214055 |
| H  | 5.267567  | 0.041582  | -2.042479 |
| C  | 4.391841  | -1.545366 | -3.216323 |
| H  | 3.531825  | -2.234846 | -3.073378 |
| H  | 4.126870  | -0.753863 | -3.950736 |
| C  | 5.605493  | -2.315116 | -3.634475 |
| H  | 5.327734  | -3.292001 | -4.087298 |
| H  | 6.205360  | -1.723586 | -4.361046 |
| C  | 1.983430  | -3.452061 | -0.423812 |
| H  | 1.502026  | -3.826413 | 0.505060  |
| H  | 2.041234  | -2.345376 | -0.371991 |
| C  | 3.253367  | -4.982605 | -1.483556 |
| H  | 3.956224  | -4.697873 | -2.295145 |
| H  | 3.602255  | -5.939084 | -1.039142 |
| C  | 1.854227  | -5.140985 | -2.047024 |
| H  | 1.349806  | -6.015347 | -1.578617 |
| H  | 1.862492  | -5.256732 | -3.152775 |
| C  | 1.176878  | -3.877655 | -1.629986 |
| H  | 1.258434  | -3.113532 | -2.433745 |
| H  | 0.109321  | -4.048723 | -1.376878 |

165

Figure\_S5\_imid-3\_modeS2\_ts(CuHadd)\_06 / electronic energy: -3525.628456218441 a.u. / lowest freq: -742.23 cm-1

|   |           |          |           |
|---|-----------|----------|-----------|
| C | 1.446742  | 1.114445 | 2.634073  |
| H | 2.161351  | 0.454040 | 3.144723  |
| C | 0.004318  | 0.541197 | 2.601184  |
| H | -0.738679 | 1.278276 | 2.948121  |
| C | 0.825776  | 0.683884 | 0.384632  |
| C | 2.973093  | 1.724257 | 0.639593  |
| C | 2.809570  | 2.679844 | -0.374225 |
| C | 4.276597  | 1.339548 | 0.999632  |
| C | 3.901172  | 3.263603 | -1.005793 |

|    |           |           |           |
|----|-----------|-----------|-----------|
| H  | 1.795555  | 2.973275  | -0.658722 |
| C  | 5.368936  | 1.954497  | 0.379508  |
| C  | 5.192051  | 2.913342  | -0.613855 |
| H  | 3.731804  | 3.998354  | -1.797208 |
| H  | 6.370318  | 1.628797  | 0.666840  |
| H  | 6.061645  | 3.371637  | -1.089657 |
| C  | -1.377132 | -0.253384 | 0.621337  |
| C  | -2.628208 | 0.284322  | 0.953550  |
| C  | -1.311074 | -1.379373 | -0.209498 |
| C  | -3.800501 | -0.301826 | 0.457717  |
| C  | -2.479684 | -1.972924 | -0.697882 |
| C  | -3.725897 | -1.432251 | -0.364841 |
| H  | -4.633733 | -1.896076 | -0.733178 |
| S  | 4.637373  | 0.001235  | 2.145521  |
| O  | 5.999265  | -0.472824 | 1.761679  |
| O  | 3.624135  | -1.054780 | 1.844853  |
| O  | 4.548799  | 0.559312  | 3.506119  |
| Cu | 1.002215  | 0.782540  | -1.516100 |
| C  | 1.502739  | 2.491865  | 3.249288  |
| C  | 2.241243  | 2.722429  | 4.422955  |
| C  | 0.811743  | 3.564671  | 2.657067  |
| C  | 2.303718  | 4.004479  | 4.977974  |
| H  | 2.762927  | 1.912255  | 4.914633  |
| C  | 0.878371  | 4.844802  | 3.212636  |
| H  | 0.218462  | 3.403387  | 1.768238  |
| C  | 1.626432  | 5.065410  | 4.371332  |
| H  | 2.876257  | 4.175021  | 5.880492  |
| H  | 0.347634  | 5.664628  | 2.745914  |
| H  | 1.676656  | 6.056860  | 4.802444  |
| C  | -0.154279 | -0.724332 | 3.407446  |
| C  | -1.032793 | -0.759938 | 4.504989  |
| C  | 0.546831  | -1.892351 | 3.057071  |
| C  | -1.198076 | -1.937766 | 5.239988  |
| H  | -1.591336 | 0.121784  | 4.792820  |
| C  | 0.389040  | -3.062980 | 3.802767  |
| H  | 1.207089  | -1.898841 | 2.202188  |
| C  | -0.486350 | -3.087722 | 4.890498  |
| H  | -1.876903 | -1.958169 | 6.082651  |
| H  | 0.942409  | -3.953007 | 3.533314  |
| H  | -0.613304 | -3.997825 | 5.462220  |
| N  | 1.795461  | 1.166920  | 1.193168  |
| N  | -0.192226 | 0.292902  | 1.164841  |
| H  | -0.355363 | -1.823997 | -0.434738 |
| H  | -2.693724 | 1.153864  | 1.595569  |
| C  | -2.396164 | -3.200435 | -1.512756 |
| C  | -2.507302 | -3.126197 | -2.929742 |
| C  | -2.207033 | -4.459911 | -0.876703 |
| C  | -2.428858 | -4.313849 | -3.679810 |
| C  | -2.114763 | -5.615448 | -1.674222 |
| C  | -2.225709 | -5.540201 | -3.057766 |
| H  | -2.522680 | -4.294930 | -4.757507 |
| H  | -1.965923 | -6.588087 | -1.224282 |
| H  | -2.160519 | -6.441868 | -3.653162 |
| C  | -5.115814 | 0.250904  | 0.826818  |
| C  | -5.717964 | -0.119592 | 2.061754  |
| C  | -5.787597 | 1.138052  | -0.059850 |
| C  | -6.981087 | 0.408959  | 2.384959  |
| C  | -7.049909 | 1.637670  | 0.309208  |
| C  | -7.635992 | 1.277000  | 1.517814  |
| H  | -7.469325 | 0.145682  | 3.314012  |
| H  | -7.589893 | 2.311701  | -0.342668 |
| H  | -8.608319 | 1.671617  | 1.783638  |
| C  | -5.183875 | 1.561614  | -1.399787 |
| H  | -4.184810 | 1.105779  | -1.552691 |
| C  | -4.964931 | 3.077863  | -1.456628 |
| H  | -4.328487 | 3.400324  | -0.604865 |
| H  | -4.446984 | 3.350102  | -2.400819 |
| H  | -5.927666 | 3.629005  | -1.415819 |
| C  | -6.052371 | 1.085627  | -2.570076 |
| H  | -6.210198 | -0.011842 | -2.502473 |
| H  | -7.040884 | 1.591289  | -2.570464 |
| H  | -5.544669 | 1.304437  | -3.533779 |
| C  | -5.043651 | -1.083763 | 3.039849  |
| H  | -4.055053 | -1.415517 | 2.662831  |
| C  | -5.873519 | -2.360711 | 3.217341  |
| H  | -5.322763 | -3.086467 | 3.853432  |
| H  | -6.851184 | -2.143668 | 3.696802  |
| H  | -6.053481 | -2.835262 | 2.228762  |
| C  | -4.775105 | -0.406169 | 4.388929  |
| H  | -4.203185 | -1.090727 | 5.050672  |
| H  | -4.171492 | 0.514081  | 4.236399  |
| H  | -5.721791 | -0.135407 | 4.901634  |
| C  | -2.123039 | -4.601850 | 0.644219  |
| H  | -2.242566 | -3.622046 | 1.149469  |
| C  | -2.716114 | -1.801182 | -3.662412 |
| H  | -2.687954 | -0.946461 | -2.956933 |
| C  | -1.599553 | -1.543770 | -4.682742 |
| H  | -0.609048 | -1.631915 | -4.190385 |

|    |           |           |           |
|----|-----------|-----------|-----------|
| H  | -1.644731 | -2.263984 | -5.526131 |
| H  | -1.693256 | -0.517543 | -5.097758 |
| C  | -4.093185 | -1.760542 | -4.333797 |
| H  | -4.172653 | -2.526322 | -5.134136 |
| H  | -4.887419 | -1.946411 | -3.579678 |
| H  | -4.268123 | -0.759604 | -4.783036 |
| C  | -0.752870 | -5.138246 | 1.074489  |
| H  | -0.545494 | -6.132172 | 0.626107  |
| H  | 0.043616  | -4.428028 | 0.765930  |
| H  | -0.716196 | -5.242339 | 2.179031  |
| C  | -3.256485 | -5.484930 | 1.180956  |
| H  | -4.238079 | -5.088410 | 0.843186  |
| H  | -3.151357 | -6.534152 | 0.833593  |
| H  | -3.247329 | -5.481041 | 2.292078  |
| C  | -0.143917 | 1.604051  | -3.019289 |
| C  | 1.100011  | 1.044988  | -3.501880 |
| H  | 1.889619  | 1.750890  | -3.788922 |
| B  | -0.342965 | 3.065786  | -2.696034 |
| O  | 0.664739  | 4.031658  | -2.736892 |
| O  | -1.569898 | 3.640802  | -2.378631 |
| C  | 0.105418  | 5.268390  | -2.251837 |
| C  | -1.423389 | 5.066346  | -2.513344 |
| C  | 0.417874  | 5.369783  | -0.767964 |
| H  | 1.503378  | 5.320080  | -0.606613 |
| H  | 0.058637  | 6.311930  | -0.331089 |
| H  | -0.050329 | 4.539840  | -0.221612 |
| C  | 0.728059  | 6.423532  | -3.006220 |
| H  | 0.253497  | 7.376403  | -2.729064 |
| H  | 1.797610  | 6.503046  | -2.766207 |
| H  | 0.638113  | 6.297544  | -4.092080 |
| C  | -1.822302 | 5.431309  | -3.935656 |
| H  | -1.806200 | 6.517426  | -4.103448 |
| H  | -1.156108 | 4.959351  | -4.671608 |
| H  | -2.842507 | 5.073558  | -4.129592 |
| C  | -2.326505 | 5.763782  | -1.518006 |
| H  | -2.195286 | 5.370254  | -0.502699 |
| H  | -2.128533 | 6.845528  | -1.498745 |
| H  | -3.380410 | 5.628036  | -1.794816 |
| Na | 5.129098  | -2.615776 | 0.922737  |
| H  | 1.068580  | 0.185069  | -4.178265 |
| H  | -1.033835 | 0.967000  | -3.087297 |
| H  | 2.117332  | 0.196861  | -2.497848 |
| O  | 3.386840  | -3.362550 | -0.511508 |
| O  | 6.465921  | -2.300457 | -0.991620 |
| C  | 2.823357  | -4.504424 | -1.071533 |
| H  | 3.623137  | -5.085169 | -1.578949 |
| H  | 2.388982  | -5.136058 | -0.267003 |
| C  | 2.651496  | -2.268616 | -0.947740 |
| H  | 1.920334  | -1.992142 | -0.161525 |
| H  | 3.327848  | -1.406106 | -1.113887 |
| C  | 1.937315  | -2.640584 | -2.226394 |
| H  | 0.970021  | -2.107718 | -2.336523 |
| H  | 2.584391  | -2.421966 | -3.103319 |
| C  | 1.751390  | -4.115886 | -2.076910 |
| H  | 0.740816  | -4.333729 | -1.667543 |
| H  | 1.883066  | -4.642904 | -3.046975 |
| C  | 6.617974  | -3.264860 | -1.976385 |
| H  | 7.701715  | -3.413514 | -2.180563 |
| H  | 6.189069  | -4.227433 | -1.625301 |
| C  | 6.351627  | -1.077160 | -1.640317 |
| H  | 5.643872  | -0.432208 | -1.082160 |
| H  | 7.344370  | -0.576110 | -1.658063 |
| C  | 5.844834  | -1.303906 | -3.054509 |
| H  | 6.499667  | -0.789898 | -3.791896 |
| H  | 4.800802  | -0.937686 | -3.168269 |
| C  | 5.907914  | -2.794774 | -3.226879 |
| H  | 4.884016  | -3.224840 | -3.268872 |
| H  | 6.470806  | -3.079914 | -4.142271 |

165

Figure\_S5\_imid-3\_modeS2\_prod(CuHadd) / electronic energy: -3525.670844336381 a.u. / lowest freq: -53.58 cm<sup>-1</sup>

|   |           |           |           |
|---|-----------|-----------|-----------|
| C | 1.553959  | -2.148920 | -2.073044 |
| H | 2.216910  | -1.792782 | -2.874591 |
| C | 0.103515  | -1.642290 | -2.206101 |
| H | -0.603641 | -2.462520 | -2.400186 |
| C | 0.971130  | -0.953270 | -0.116855 |
| C | 3.253312  | -1.774072 | -0.204075 |
| C | 3.275016  | -2.404484 | 1.049077  |
| C | 4.471270  | -1.417702 | -0.815525 |
| C | 4.477131  | -2.703757 | 1.681481  |
| H | 2.324250  | -2.666814 | 1.519812  |
| C | 5.671219  | -1.756910 | -0.183778 |
| C | 5.682409  | -2.398759 | 1.051924  |
| H | 4.463581  | -3.188939 | 2.659952  |
| H | 6.601887  | -1.473804 | -0.678247 |
| H | 6.633475  | -2.647148 | 1.527836  |
| C | -1.377923 | -0.471891 | -0.505845 |
| C | -2.582329 | -1.151836 | -0.757385 |
| C | -1.422710 | 0.843111  | -0.010808 |

|    |           |           |           |
|----|-----------|-----------|-----------|
| C  | -3.815015 | -0.517945 | -0.544974 |
| C  | -2.655210 | 1.477891  | 0.199749  |
| C  | -3.846375 | 0.794014  | -0.063218 |
| H  | -4.797587 | 1.297458  | 0.068042  |
| S  | 4.584352  | -0.363537 | -2.291005 |
| O  | 5.997008  | 0.056271  | -2.344096 |
| O  | 3.647713  | 0.756228  | -1.956609 |
| O  | 4.144051  | -1.164319 | -3.452301 |
| Cu | 1.318601  | -0.241665 | 1.645942  |
| C  | 1.641983  | -3.655444 | -1.977240 |
| C  | 2.415695  | -4.379208 | -2.901470 |
| C  | 0.970872  | -4.353499 | -0.954093 |
| C  | 2.516539  | -5.770311 | -2.803050 |
| H  | 2.943161  | -3.869168 | -3.697429 |
| C  | 1.076278  | -5.743522 | -0.859119 |
| H  | 0.368817  | -3.822619 | -0.228533 |
| C  | 1.848415  | -6.451646 | -1.782723 |
| H  | 3.114702  | -6.320452 | -3.517871 |
| H  | 0.559401  | -6.271538 | -0.068191 |
| H  | 1.929102  | -7.528342 | -1.707877 |
| C  | -0.049605 | -0.599479 | -3.289417 |
| C  | -0.759934 | -0.904600 | -4.462895 |
| C  | 0.508544  | 0.685112  | -3.145449 |
| C  | -0.920777 | 0.058224  | -5.463817 |
| H  | -1.185603 | -1.889434 | -4.606116 |
| C  | 0.351615  | 1.641553  | -4.151623 |
| H  | 1.052626  | 0.952303  | -2.250578 |
| C  | -0.367418 | 1.330789  | -5.307368 |
| H  | -1.472660 | -0.183638 | -6.362824 |
| H  | 0.783570  | 2.626459  | -4.033427 |
| H  | -0.492968 | 2.075049  | -6.082967 |
| N  | 1.984286  | -1.526824 | -0.797606 |
| N  | -0.139878 | -1.065938 | -0.862874 |
| H  | -0.504020 | 1.393417  | 0.142579  |
| H  | -2.564861 | -2.161318 | -1.148181 |
| C  | -2.715420 | 2.907061  | 0.565096  |
| C  | -2.778349 | 3.294716  | 1.932820  |
| C  | -2.832871 | 3.888361  | -0.460606 |
| C  | -2.977331 | 4.652741  | 2.244397  |
| C  | -3.019817 | 5.234146  | -0.095219 |
| C  | -3.090308 | 5.608304  | 1.241327  |
| H  | -3.061032 | 4.979625  | 3.271973  |
| H  | -3.120448 | 6.003719  | -0.848993 |
| H  | -3.242083 | 6.647833  | 1.502215  |
| C  | -5.082071 | -1.191278 | -0.906187 |
| C  | -5.488706 | -1.256361 | -2.270790 |
| C  | -5.930629 | -1.713705 | 0.112180  |
| C  | -6.721369 | -1.858594 | -2.584947 |
| C  | -7.159050 | -2.293071 | -0.255887 |
| C  | -7.543323 | -2.369399 | -1.588476 |
| H  | -7.061997 | -1.921509 | -3.609962 |
| H  | -7.832665 | -2.687089 | 0.493507  |
| H  | -8.492025 | -2.820004 | -1.850780 |
| C  | -5.560677 | -1.655000 | 1.593132  |
| H  | -4.556348 | -1.210933 | 1.732480  |
| C  | -5.493524 | -3.059328 | 2.208052  |
| H  | -4.743309 | -3.673944 | 1.666007  |
| H  | -5.189128 | -2.994755 | 3.273531  |
| H  | -6.477347 | -3.570995 | 2.166773  |
| C  | -6.536204 | -0.761286 | 2.367787  |
| H  | -6.583604 | 0.244688  | 1.898669  |
| H  | -7.556720 | -1.198694 | 2.383596  |
| H  | -6.188209 | -0.638187 | 3.415864  |
| C  | -4.652780 | -0.662574 | -3.405718 |
| H  | -3.715025 | -0.210822 | -3.025037 |
| C  | -5.406328 | 0.472276  | -4.110099 |
| H  | -4.738300 | 0.974243  | -4.842584 |
| H  | -6.297650 | 0.091023  | -4.651349 |
| H  | -5.734771 | 1.228254  | -3.365691 |
| C  | -4.233110 | -1.746895 | -4.405669 |
| H  | -3.599594 | -1.305161 | -5.202654 |
| H  | -3.646014 | -2.533560 | -3.885135 |
| H  | -5.114044 | -2.216768 | -4.890412 |
| C  | -2.785799 | 3.525644  | -1.946098 |
| H  | -2.612251 | 2.439990  | -2.091747 |
| C  | -2.689957 | 2.277975  | 3.070017  |
| H  | -2.414282 | 1.276380  | 2.682224  |
| C  | -1.600894 | 2.655013  | 4.084825  |
| H  | -0.630355 | 2.797332  | 3.566918  |
| H  | -1.855242 | 3.585770  | 4.632468  |
| H  | -1.481071 | 1.845541  | 4.834410  |
| C  | -4.048692 | 2.120405  | 3.759993  |
| H  | -4.363166 | 3.069284  | 4.244116  |
| H  | -4.818139 | 1.824717  | 3.015488  |
| H  | -3.993723 | 1.326780  | 4.535463  |
| C  | -1.623679 | 4.231095  | -2.653689 |
| H  | -1.742649 | 5.334396  | -2.634963 |
| H  | -0.668411 | 3.963061  | -2.158045 |

|    |           |           |           |
|----|-----------|-----------|-----------|
| H  | -1.569404 | 3.904446  | -3.713890 |
| C  | -4.120494 | 3.840666  | -2.630951 |
| H  | -4.949766 | 3.330626  | -2.095707 |
| H  | -4.319054 | 4.933042  | -2.643659 |
| H  | -4.105843 | 3.473230  | -3.679378 |
| C  | 1.865013  | 0.436706  | 3.434518  |
| C  | 3.325999  | 0.288646  | 3.807352  |
| H  | 3.673733  | -0.750466 | 3.693294  |
| B  | 0.864364  | -0.609430 | 3.891545  |
| O  | 1.170712  | -1.919594 | 4.280742  |
| O  | -0.523352 | -0.435389 | 3.825120  |
| C  | -0.039607 | -2.692281 | 4.182771  |
| C  | -1.146736 | -1.604590 | 4.373335  |
| C  | -0.079457 | -3.308371 | 2.790162  |
| H  | 0.809470  | -3.936950 | 2.637463  |
| H  | -0.964666 | -3.941112 | 2.635463  |
| H  | -0.079298 | -2.521898 | 2.017176  |
| C  | -0.027663 | -3.776966 | 5.238243  |
| H  | -0.977520 | -4.331744 | 5.245439  |
| H  | 0.776545  | -4.497323 | 5.034507  |
| H  | 0.138196  | -3.366167 | 6.241712  |
| C  | -1.447615 | -1.326435 | 5.838381  |
| H  | -1.987500 | -2.157492 | 6.313875  |
| H  | -0.526668 | -1.142730 | 6.409501  |
| H  | -2.075455 | -0.428692 | 5.916299  |
| C  | -2.426095 | -1.879047 | 3.615692  |
| H  | -2.257348 | -1.897288 | 2.531406  |
| H  | -2.857152 | -2.844580 | 3.916407  |
| H  | -3.169117 | -1.098449 | 3.826327  |
| Na | 3.406335  | 1.412225  | 0.171209  |
| H  | 3.540379  | 0.564774  | 4.857475  |
| H  | 1.491239  | 1.469405  | 3.529007  |
| H  | 4.010454  | 0.905950  | 3.199140  |
| O  | 5.430090  | 2.342260  | 0.656782  |
| O  | 1.968480  | 3.155827  | -0.039246 |
| C  | 6.364054  | 1.608488  | 1.378680  |
| H  | 6.525332  | 2.100604  | 2.362496  |
| H  | 5.974423  | 0.584818  | 1.556215  |
| C  | 6.097852  | 3.017263  | -0.360728 |
| H  | 5.723639  | 2.650758  | -1.339776 |
| H  | 5.880453  | 4.104427  | -0.290144 |
| C  | 7.588988  | 2.769556  | -0.251747 |
| H  | 8.055231  | 2.599701  | -1.246603 |
| H  | 8.082654  | 3.627459  | 0.256529  |
| C  | 7.664785  | 1.552063  | 0.609729  |
| H  | 7.696482  | 0.638969  | -0.023149 |
| H  | 8.547205  | 1.575447  | 1.285450  |
| C  | 1.378128  | 3.775296  | 1.054023  |
| H  | 0.580609  | 3.124781  | 1.468045  |
| H  | 2.148719  | 3.934372  | 1.840025  |
| C  | 2.217580  | 4.124871  | -1.006069 |
| H  | 3.311904  | 4.202027  | -1.179997 |
| H  | 1.739242  | 3.812245  | -1.957633 |
| C  | 1.659091  | 5.461939  | -0.553961 |
| H  | 1.069141  | 5.956379  | -1.356523 |
| H  | 2.485614  | 6.131111  | -0.227016 |
| C  | 0.800467  | 5.099030  | 0.614835  |
| H  | 0.847560  | 5.861378  | 1.422401  |
| H  | -0.249085 | 4.959791  | 0.283993  |

165

Figure\_S5\_imid-3\_modeR1\_ed(CuHadd) / electronic energy: -3525.642230729441 a.u. / lowest freq: 9.73 cm-1

|    |           |           |           |
|----|-----------|-----------|-----------|
| C  | -0.010388 | 3.285454  | -1.458643 |
| H  | -0.669470 | 3.088660  | -2.319861 |
| C  | 1.275271  | 2.438088  | -1.485265 |
| H  | 2.136809  | 2.969239  | -1.044027 |
| C  | -0.179420 | 1.571465  | 0.156443  |
| C  | -1.959135 | 3.258477  | 0.172070  |
| C  | -1.976110 | 4.295195  | 1.107408  |
| C  | -3.179247 | 2.784188  | -0.336022 |
| C  | -3.175191 | 4.869776  | 1.518438  |
| H  | -1.031726 | 4.633723  | 1.536808  |
| C  | -4.380071 | 3.366709  | 0.071687  |
| C  | -4.381274 | 4.411481  | 0.992402  |
| H  | -3.164136 | 5.674327  | 2.256568  |
| H  | -5.312612 | 2.974560  | -0.338653 |
| H  | -5.326583 | 4.860359  | 1.305207  |
| C  | 1.906711  | 0.447830  | -0.103112 |
| C  | 2.695093  | 0.847706  | 0.983032  |
| C  | 2.144617  | -0.790752 | -0.711993 |
| C  | 3.720935  | 0.020541  | 1.451424  |
| C  | 3.146436  | -1.644769 | -0.219335 |
| C  | 3.952132  | -1.219697 | 0.846062  |
| H  | 4.749001  | -1.856146 | 1.211040  |
| S  | -3.248158 | 1.377779  | -1.445539 |
| O  | -4.689744 | 1.015180  | -1.546991 |
| O  | -2.508784 | 0.293420  | -0.717039 |
| O  | -2.615519 | 1.795995  | -2.708102 |
| Cu | -1.110837 | 0.453279  | 1.528759  |

|   |           |           |           |
|---|-----------|-----------|-----------|
| C | 0.252941  | 4.766262  | -1.341544 |
| C | -0.235828 | 5.647578  | -2.321944 |
| C | 0.982213  | 5.288691  | -0.256245 |
| C | -0.000500 | 7.021815  | -2.217772 |
| H | -0.799503 | 5.273349  | -3.167438 |
| C | 1.214191  | 6.663264  | -0.156338 |
| H | 1.361527  | 4.633008  | 0.517751  |
| C | 0.723625  | 7.529210  | -1.136297 |
| H | -0.380365 | 7.693996  | -2.976267 |
| H | 1.772845  | 7.057366  | 0.682686  |
| H | 0.903830  | 8.593480  | -1.057279 |
| C | 1.638716  | 1.980764  | -2.873958 |
| C | 2.837990  | 2.408728  | -3.470425 |
| C | 0.768356  | 1.156169  | -3.607878 |
| C | 3.143699  | 2.040259  | -4.784098 |
| H | 3.528919  | 3.041481  | -2.927334 |
| C | 1.076404  | 0.790734  | -4.920556 |
| H | -0.154816 | 0.811104  | -3.166131 |
| C | 2.258756  | 1.240727  | -5.512041 |
| H | 4.064988  | 2.379018  | -5.239878 |
| H | 0.397125  | 0.160315  | -5.479525 |
| H | 2.496492  | 0.957822  | -6.529232 |
| N | -0.700711 | 2.739230  | -0.263648 |
| N | 0.905013  | 1.310592  | -0.602033 |
| H | 1.560532  | -1.083044 | -1.572422 |
| H | 2.519835  | 1.809714  | 1.450404  |
| C | 3.359311  | -2.983616 | -0.821695 |
| C | 3.040526  | -4.165437 | -0.083802 |
| C | 3.914161  | -3.097837 | -2.130094 |
| C | 3.261400  | -5.420405 | -0.680295 |
| C | 4.092278  | -4.378664 | -2.685535 |
| C | 3.766000  | -5.522131 | -1.969339 |
| H | 3.043442  | -6.334665 | -0.144624 |
| H | 4.508002  | -4.500105 | -3.676958 |
| H | 3.922295  | -6.497836 | -2.411395 |
| C | 4.555973  | 0.460250  | 2.583152  |
| C | 5.734578  | 1.219062  | 2.341243  |
| C | 4.159691  | 0.158085  | 3.915475  |
| C | 6.490531  | 1.665780  | 3.440439  |
| C | 4.944886  | 0.635180  | 4.980831  |
| C | 6.096703  | 1.377750  | 4.742976  |
| H | 7.390612  | 2.247850  | 3.292383  |
| H | 4.665986  | 0.433404  | 6.006655  |
| H | 6.688960  | 1.734501  | 5.575894  |
| C | 2.904982  | -0.659783 | 4.224319  |
| H | 2.417967  | -1.014142 | 3.293504  |
| C | 1.860468  | 0.191714  | 4.954299  |
| H | 1.610542  | 1.087002  | 4.345423  |
| H | 0.929202  | -0.395024 | 5.105069  |
| H | 2.233448  | 0.523165  | 5.946335  |
| C | 3.246408  | -1.922553 | 5.024890  |
| H | 4.048170  | -2.492819 | 4.509575  |
| H | 3.588345  | -1.671771 | 6.050900  |
| H | 2.350485  | -2.574955 | 5.104121  |
| C | 6.198662  | 1.570952  | 0.927116  |
| H | 5.517389  | 1.144909  | 0.162819  |
| C | 7.581869  | 0.977500  | 0.633324  |
| H | 7.853649  | 1.155572  | -0.429193 |
| H | 8.363245  | 1.434482  | 1.276181  |
| H | 7.567627  | -0.119885 | 0.807285  |
| C | 6.187869  | 3.088011  | 0.704648  |
| H | 6.435840  | 3.318910  | -0.353491 |
| H | 5.176169  | 3.494652  | 0.919297  |
| H | 6.927197  | 3.597089  | 1.358176  |
| C | 4.374227  | -1.883433 | -2.936494 |
| H | 4.196251  | -0.938864 | -2.385763 |
| C | 2.488366  | -4.126991 | 1.342643  |
| H | 2.248927  | -3.090551 | 1.646796  |
| C | 1.176298  | -4.913812 | 1.471404  |
| H | 0.475993  | -4.625917 | 0.665016  |
| H | 1.349285  | -6.008806 | 1.413955  |
| H | 0.694362  | -4.689122 | 2.447076  |
| C | 3.527419  | -4.652432 | 2.340223  |
| H | 3.778898  | -5.714412 | 2.134199  |
| H | 4.456890  | -4.048394 | 2.279557  |
| H | 3.131909  | -4.580291 | 3.375511  |
| C | 3.597729  | -1.769742 | -4.252928 |
| H | 3.772823  | -2.648538 | -4.907594 |
| H | 2.509827  | -1.687521 | -4.044914 |
| H | 3.923056  | -0.863406 | -4.803282 |
| C | 5.885993  | -1.932566 | -3.192388 |
| H | 6.430520  | -2.027165 | -2.228348 |
| H | 6.158799  | -2.787569 | -3.846078 |
| H | 6.218473  | -0.994308 | -3.686107 |
| C | -0.704918 | -1.568965 | 1.415815  |
| C | -1.529440 | -1.229176 | 2.507220  |
| H | -1.125853 | -1.139996 | 3.520656  |
| B | -1.173177 | -2.219258 | 0.110751  |



|    |           |           |           |
|----|-----------|-----------|-----------|
| O  | -0.291863 | -2.652614 | -0.845786 |
| O  | -2.485930 | -2.562258 | -0.213507 |
| C  | -1.029060 | -3.121658 | -1.986976 |
| C  | -2.439491 | -3.435125 | -1.376321 |
| C  | -1.062362 | -1.991380 | -3.002075 |
| H  | -0.033770 | -1.731361 | -3.282759 |
| H  | -1.591951 | -2.279852 | -3.920353 |
| H  | -1.541341 | -1.095853 | -2.584250 |
| C  | -0.305532 | -4.322972 | -2.560508 |
| H  | -0.860976 | -4.755616 | -3.405113 |
| H  | 0.681528  | -4.015316 | -2.932131 |
| H  | -0.146138 | -5.108612 | -1.812019 |
| C  | -2.570945 | -4.858653 | -0.863459 |
| H  | -2.578057 | -5.587881 | -1.685235 |
| H  | -1.752746 | -5.120736 | -0.180142 |
| H  | -3.514276 | -4.965446 | -0.310365 |
| C  | -3.593483 | -3.095845 | -2.295686 |
| H  | -3.610923 | -2.029984 | -2.559710 |
| H  | -3.526374 | -3.668937 | -3.231442 |
| H  | -4.554368 | -3.350665 | -1.829902 |
| Na | -4.272235 | -0.972909 | -0.031005 |
| H  | -2.605959 | -1.437159 | 2.477574  |
| H  | 0.375031  | -1.605286 | 1.607454  |
| H  | -1.750254 | 1.470631  | 2.571910  |
| O  | -5.231486 | -0.143920 | 1.907101  |
| O  | -6.350850 | -1.874190 | -0.501763 |
| C  | -7.365709 | -0.939150 | -0.663562 |
| H  | -7.019844 | 0.049237  | -0.294014 |
| H  | -7.607768 | -0.844904 | -1.745030 |
| C  | -6.961701 | -3.082446 | -0.203258 |
| H  | -7.164272 | -3.635378 | -1.147501 |
| H  | -6.284914 | -3.696517 | 0.428153  |
| C  | -8.255978 | -2.798016 | 0.527518  |
| H  | -8.095414 | -2.851723 | 1.626770  |
| H  | -9.053193 | -3.513547 | 0.229852  |
| C  | -8.588546 | -1.391398 | 0.116101  |
| H  | -9.494939 | -1.368061 | -0.527897 |
| H  | -8.750815 | -0.748268 | 1.008955  |
| C  | -5.783846 | -1.006163 | 2.841914  |
| H  | -5.542883 | -2.055962 | 2.570985  |
| H  | -6.889543 | -0.884229 | 2.846078  |
| C  | -4.962105 | 1.046993  | 2.569713  |
| H  | -4.031362 | 1.488273  | 2.164791  |
| H  | -5.794931 | 1.762079  | 2.390354  |
| C  | -4.810049 | 0.772403  | 4.056530  |
| H  | -3.758695 | 0.920263  | 4.386828  |
| H  | -5.481182 | 1.434651  | 4.646399  |
| C  | -5.215074 | -0.666323 | 4.201294  |
| H  | -4.324208 | -1.298092 | 4.412463  |
| H  | -5.972382 | -0.803899 | 5.003585  |

165

Figure\_S5\_imid-3\_modeR1\_ts(CuHadd)\_01 / electronic energy: -3525.627389349992 a.u. / lowest freq: -747.21 cm<sup>-1</sup>

|    |           |           |           |
|----|-----------|-----------|-----------|
| C  | 0.071600  | 3.362476  | -1.115416 |
| H  | -0.502012 | 3.140714  | -2.029905 |
| C  | 1.404970  | 2.594439  | -1.049110 |
| H  | 2.210426  | 3.187246  | -0.582412 |
| C  | -0.136835 | 1.595307  | 0.450149  |
| C  | -1.960379 | 3.252198  | 0.407502  |
| C  | -2.031117 | 4.198997  | 1.433515  |
| C  | -3.146400 | 2.882078  | -0.249169 |
| C  | -3.241473 | 4.797330  | 1.775133  |
| H  | -1.118404 | 4.458807  | 1.973187  |
| C  | -4.355488 | 3.491528  | 0.083730  |
| C  | -4.403701 | 4.460327  | 1.084249  |
| H  | -3.272496 | 5.532088  | 2.582229  |
| H  | -5.258639 | 3.174469  | -0.441870 |
| H  | -5.353682 | 4.936998  | 1.335710  |
| C  | 1.999519  | 0.492431  | 0.211002  |
| C  | 3.186029  | 0.884093  | 0.845683  |
| C  | 1.832784  | -0.844209 | -0.175720 |
| C  | 4.203707  | -0.047658 | 1.078049  |
| C  | 2.853475  | -1.782258 | 0.051816  |
| C  | 4.038203  | -1.377297 | 0.678438  |
| H  | 4.841300  | -2.088800 | 0.830879  |
| S  | -3.159696 | 1.499652  | -1.385897 |
| O  | -4.594509 | 1.212265  | -1.661154 |
| O  | -2.569518 | 0.391039  | -0.559362 |
| O  | -2.354372 | 1.866957  | -2.561606 |
| Cu | -1.215829 | 0.328591  | 1.445477  |
| C  | 0.232541  | 4.854920  | -0.961852 |
| C  | -0.244068 | 5.720487  | -1.962221 |
| C  | 0.846627  | 5.403849  | 0.179989  |
| C  | -0.109644 | 7.105039  | -1.822143 |
| H  | -0.721831 | 5.326081  | -2.850381 |
| C  | 0.977860  | 6.788664  | 0.315728  |
| H  | 1.214854  | 4.759982  | 0.968962  |
| C  | 0.500415  | 7.638676  | -0.684452 |
| H  | -0.479889 | 7.764827  | -2.596127 |

|   |           |           |           |
|---|-----------|-----------|-----------|
| H | 1.448159  | 7.202951  | 1.198073  |
| H | 0.602316  | 8.710860  | -0.577583 |
| C | 1.870935  | 2.107060  | -2.397304 |
| C | 3.085953  | 2.565616  | -2.934817 |
| C | 1.113950  | 1.167526  | -3.121875 |
| C | 3.532298  | 2.095859  | -4.173346 |
| H | 3.687448  | 3.287674  | -2.397860 |
| C | 1.558285  | 0.709187  | -4.363972 |
| H | 0.184687  | 0.785409  | -2.720359 |
| C | 2.767467  | 1.171702  | -4.889061 |
| H | 4.470700  | 2.450681  | -4.579389 |
| H | 0.969227  | -0.012556 | -4.914975 |
| H | 3.113937  | 0.810277  | -5.848528 |
| N | -0.681629 | 2.755690  | 0.012389  |
| N | 1.048780  | 1.467124  | -0.168715 |
| H | 0.941377  | -1.130887 | -0.709131 |
| H | 3.330373  | 1.918553  | 1.132800  |
| C | 2.728844  | -3.178903 | -0.424423 |
| C | 2.434603  | -4.223444 | 0.500954  |
| C | 3.059510  | -3.498897 | -1.774412 |
| C | 2.461825  | -5.556660 | 0.053946  |
| C | 3.093339  | -4.852039 | -2.161625 |
| C | 2.780671  | -5.863111 | -1.262164 |
| H | 2.263075  | -6.373725 | 0.734258  |
| H | 3.384811  | -5.138938 | -3.161951 |
| H | 2.812588  | -6.896931 | -1.581554 |
| C | 5.475463  | 0.387081  | 1.684177  |
| C | 6.504460  | 0.924344  | 0.860635  |
| C | 5.664309  | 0.286460  | 3.090521  |
| C | 7.695388  | 1.366083  | 1.465510  |
| C | 6.873540  | 0.742518  | 3.646638  |
| C | 7.874088  | 1.276412  | 2.841723  |
| H | 8.495812  | 1.784787  | 0.869818  |
| H | 7.046936  | 0.687748  | 4.713301  |
| H | 8.797353  | 1.622501  | 3.288507  |
| C | 4.594121  | -0.293745 | 4.015417  |
| H | 3.709575  | -0.635790 | 3.440433  |
| C | 4.080584  | 0.767297  | 4.995760  |
| H | 3.702869  | 1.649145  | 4.435044  |
| H | 3.243024  | 0.354860  | 5.598065  |
| H | 4.882572  | 1.098189  | 5.688829  |
| C | 5.115529  | -1.528337 | 4.761467  |
| H | 5.516699  | -2.268503 | 4.036988  |
| H | 5.918218  | -1.258321 | 5.479391  |
| H | 4.287718  | -2.008411 | 5.325929  |
| C | 6.358212  | 1.034777  | -0.658268 |
| H | 5.384950  | 0.627318  | -1.000363 |
| C | 7.433374  | 0.213335  | -1.380444 |
| H | 7.232960  | 0.203630  | -2.473317 |
| H | 8.446083  | 0.636710  | -1.213720 |
| H | 7.418334  | -0.835914 | -1.015814 |
| C | 6.388682  | 2.499619  | -1.109120 |
| H | 6.202856  | 2.564653  | -2.202501 |
| H | 5.593165  | 3.072530  | -0.586061 |
| H | 7.371449  | 2.968568  | -0.892460 |
| C | 3.493549  | -2.428842 | -2.778805 |
| H | 3.199334  | -1.419208 | -2.427550 |
| C | 2.161631  | -3.949743 | 1.979707  |
| H | 2.019293  | -2.864244 | 2.155696  |
| C | 0.875517  | -4.636033 | 2.466512  |
| H | 0.043876  | -4.453559 | 1.756990  |
| H | 1.013118  | -5.732612 | 2.571012  |
| H | 0.584073  | -4.230383 | 3.458897  |
| C | 3.357747  | -4.382119 | 2.835076  |
| H | 3.517546  | -5.479556 | 2.770885  |
| H | 4.279489  | -3.868863 | 2.490095  |
| H | 3.185282  | -4.108539 | 3.897917  |
| C | 2.824924  | -2.601052 | -4.151958 |
| H | 3.198625  | -3.500311 | -4.683058 |
| H | 1.724662  | -2.679346 | -4.040751 |
| H | 3.050098  | -1.724144 | -4.793004 |
| C | 5.018668  | -2.422275 | -2.918038 |
| H | 5.489041  | -2.262237 | -1.924748 |
| H | 5.382060  | -3.385785 | -3.335048 |
| H | 5.338178  | -1.596528 | -3.589356 |
| C | -1.203218 | -1.746985 | 1.665332  |
| C | -2.097022 | -1.086976 | 2.589958  |
| H | -1.872747 | -1.133546 | 3.661430  |
| B | -1.594495 | -2.396723 | 0.365251  |
| O | -0.700608 | -3.052165 | -0.472403 |
| O | -2.905358 | -2.506177 | -0.153588 |
| C | -1.361210 | -3.287354 | -1.721447 |
| C | -2.850926 | -3.415246 | -1.279742 |
| C | -1.134981 | -2.072088 | -2.611164 |
| H | -0.057688 | -1.897536 | -2.719982 |
| H | -1.552690 | -2.214530 | -3.617884 |
| H | -1.576862 | -1.166009 | -2.171815 |
| C | -0.786328 | -4.534644 | -2.357531 |

|    |           |           |           |
|----|-----------|-----------|-----------|
| H  | -1.350441 | -4.817395 | -3.258351 |
| H  | 0.253577  | -4.357168 | -2.660556 |
| H  | -0.791126 | -5.383912 | -1.663015 |
| C  | -3.189407 | -4.802336 | -0.758689 |
| H  | -3.229366 | -5.545199 | -1.567706 |
| H  | -2.450229 | -5.139622 | -0.018687 |
| H  | -4.173620 | -4.784326 | -0.269862 |
| C  | -3.844621 | -2.982864 | -2.337185 |
| H  | -3.722748 | -1.926597 | -2.613034 |
| H  | -3.715932 | -3.580154 | -3.251647 |
| H  | -4.878662 | -3.129204 | -1.998613 |
| Na | -4.464258 | -0.792512 | -0.101227 |
| H  | -3.175671 | -1.191601 | 2.415498  |
| H  | -0.180073 | -1.914280 | 2.019510  |
| H  | -2.154547 | 0.562109  | 2.718050  |
| O  | -5.471098 | 0.088763  | 1.812447  |
| O  | -6.591208 | -1.530672 | -0.693745 |
| C  | -7.517115 | -0.523164 | -0.933004 |
| H  | -7.128065 | 0.437777  | -0.534727 |
| H  | -7.664978 | -0.414780 | -2.030074 |
| C  | -7.312335 | -2.690329 | -0.453393 |
| H  | -7.474701 | -3.228311 | -1.413888 |
| H  | -6.738394 | -3.351987 | 0.229512  |
| C  | -8.639622 | -2.310936 | 0.167231  |
| H  | -8.580139 | -2.383111 | 1.275557  |
| H  | -9.460018 | -2.961546 | -0.206752 |
| C  | -8.828073 | -0.880719 | -0.254209 |
| H  | -9.677689 | -0.782573 | -0.965074 |
| H  | -9.007061 | -0.230721 | 0.630408  |
| C  | -6.195084 | -0.734973 | 2.661227  |
| H  | -6.036056 | -1.796648 | 2.377257  |
| H  | -7.278194 | -0.499692 | 2.566631  |
| C  | -5.156615 | 1.229740  | 2.539413  |
| H  | -4.166977 | 1.610311  | 2.219351  |
| H  | -5.917317 | 2.014960  | 2.334300  |
| C  | -5.135581 | 0.888568  | 4.019259  |
| H  | -4.095417 | 0.887132  | 4.412809  |
| H  | -5.750571 | 1.612703  | 4.597358  |
| C  | -5.727456 | -0.491070 | 4.079604  |
| H  | -4.947720 | -1.233501 | 4.359624  |
| H  | -6.573634 | -0.545602 | 4.798728  |

165

Figure\_S5\_imid-3\_modeR1\_ts(CuHadd)\_02 / electronic energy: -3525.626508464365 a.u. / lowest freq: -740.18 cm-1

|    |           |           |           |
|----|-----------|-----------|-----------|
| C  | -0.191458 | 3.336765  | -1.058310 |
| H  | -0.792985 | 3.085953  | -1.947084 |
| C  | 1.180991  | 2.641520  | -1.058803 |
| H  | 1.963501  | 3.259576  | -0.585155 |
| C  | -0.241144 | 1.536731  | 0.477896  |
| C  | -2.146838 | 3.080961  | 0.557239  |
| C  | -2.239889 | 4.031803  | 1.577735  |
| C  | -3.331569 | 2.586151  | -0.012800 |
| C  | -3.477571 | 4.503310  | 2.008303  |
| H  | -1.323165 | 4.389595  | 2.049924  |
| C  | -4.569778 | 3.067709  | 0.411481  |
| C  | -4.646222 | 4.032470  | 1.413656  |
| H  | -3.525562 | 5.240729  | 2.812152  |
| H  | -5.470125 | 2.657013  | -0.049715 |
| H  | -5.620176 | 4.405212  | 1.738257  |
| C  | 1.931062  | 0.550033  | 0.127628  |
| C  | 3.081515  | 1.005847  | 0.785452  |
| C  | 1.866636  | -0.780212 | -0.309808 |
| C  | 4.167676  | 0.147171  | 0.984692  |
| C  | 2.949950  | -1.650082 | -0.097344 |
| C  | 4.102055  | -1.177143 | 0.542138  |
| H  | 4.956864  | -1.830361 | 0.671802  |
| S  | -3.292263 | 1.205263  | -1.152560 |
| O  | -4.709611 | 0.889762  | -1.466255 |
| O  | -2.691671 | 0.108328  | -0.314792 |
| O  | -2.464634 | 1.592652  | -2.305719 |
| Cu | -1.163584 | 0.207638  | 1.541976  |
| C  | -0.105267 | 4.834480  | -0.899147 |
| C  | -0.670671 | 5.678299  | -1.871375 |
| C  | 0.528482  | 5.409851  | 0.218763  |
| C  | -0.604101 | 7.067375  | -1.727140 |
| H  | -1.164855 | 5.263250  | -2.740954 |
| C  | 0.591631  | 6.798999  | 0.358826  |
| H  | 0.964589  | 4.783020  | 0.986577  |
| C  | 0.026121  | 7.627222  | -0.613282 |
| H  | -1.042463 | 7.710289  | -2.479429 |
| H  | 1.077501  | 7.233426  | 1.222873  |
| H  | 0.075431  | 8.702775  | -0.503067 |
| C  | 1.640963  | 2.237964  | -2.436180 |
| C  | 2.808497  | 2.798035  | -2.983481 |
| C  | 0.928179  | 1.279936  | -3.181295 |
| C  | 3.248839  | 2.413064  | -4.252938 |
| H  | 3.377532  | 3.534141  | -2.430168 |
| C  | 1.364027  | 0.909320  | -4.455334 |
| H  | 0.041257  | 0.814086  | -2.772740 |

|   |           |           |           |
|---|-----------|-----------|-----------|
| C | 2.524842  | 1.473224  | -4.990186 |
| H | 4.150373  | 2.846312  | -4.666364 |
| H | 0.807346  | 0.175468  | -5.023642 |
| H | 2.865965  | 1.177826  | -5.973865 |
| N | -0.855004 | 2.681284  | 0.098521  |
| N | 0.908654  | 1.462950  | -0.216781 |
| H | 1.003233  | -1.112971 | -0.865995 |
| H | 3.147185  | 2.037317  | 1.109819  |
| C | 2.923452  | -3.042008 | -0.601234 |
| C | 2.747881  | -4.126926 | 0.308930  |
| C | 3.215391  | -3.306409 | -1.971745 |
| C | 2.836862  | -5.443871 | -0.176780 |
| C | 3.307538  | -4.644317 | -2.399894 |
| C | 3.103478  | -5.695819 | -1.515848 |
| H | 2.724790  | -6.289017 | 0.488918  |
| H | 3.564386  | -4.885233 | -3.422005 |
| H | 3.181372  | -6.717011 | -1.866404 |
| C | 5.410007  | 0.659852  | 1.589691  |
| C | 6.388542  | 1.286636  | 0.768025  |
| C | 5.624271  | 0.536076  | 2.990299  |
| C | 7.557607  | 1.787786  | 1.369076  |
| C | 6.808150  | 1.057473  | 3.543507  |
| C | 7.760865  | 1.675296  | 2.740350  |
| H | 8.321548  | 2.270934  | 0.774255  |
| H | 6.999644  | 0.986916  | 4.606147  |
| H | 8.666187  | 2.068842  | 3.184554  |
| C | 4.608634  | -0.139988 | 3.911498  |
| H | 3.741080  | -0.525080 | 3.337745  |
| C | 4.038777  | 0.856669  | 4.927593  |
| H | 3.594906  | 1.726055  | 4.396704  |
| H | 3.239270  | 0.372234  | 5.528024  |
| H | 4.826362  | 1.221728  | 5.620024  |
| C | 5.222360  | -1.356348 | 4.616018  |
| H | 5.662118  | -2.047545 | 3.866053  |
| H | 6.015208  | -1.052355 | 5.331289  |
| H | 4.436786  | -1.906492 | 5.176891  |
| C | 6.212346  | 1.427004  | -0.745598 |
| H | 5.254211  | 0.982554  | -1.083668 |
| C | 7.312761  | 0.674267  | -1.503041 |
| H | 7.102746  | 0.691638  | -2.594052 |
| H | 8.308966  | 1.132720  | -1.329489 |
| H | 7.342016  | -0.386330 | -1.173342 |
| C | 6.164085  | 2.901652  | -1.162361 |
| H | 5.952383  | 2.982256  | -2.250046 |
| H | 5.352868  | 3.423847  | -0.611009 |
| H | 7.127721  | 3.412349  | -0.954654 |
| C | 3.541392  | -2.190143 | -2.966511 |
| H | 3.283501  | -1.196072 | -2.549917 |
| C | 2.534945  | -3.911368 | 1.807754  |
| H | 2.344904  | -2.841377 | 2.026267  |
| C | 1.313023  | -4.680024 | 2.334402  |
| H | 0.437153  | -4.517598 | 1.676390  |
| H | 1.510939  | -5.770844 | 2.391532  |
| H | 1.053814  | -4.323080 | 3.354086  |
| C | 3.792715  | -4.304601 | 2.590913  |
| H | 4.005233  | -5.389796 | 2.485321  |
| H | 4.669257  | -3.734291 | 2.218944  |
| H | 3.658822  | -4.071754 | 3.668875  |
| C | 2.735752  | -2.318865 | -4.267540 |
| H | 3.022360  | -3.222103 | -4.843772 |
| H | 1.650661  | -2.363022 | -4.043942 |
| H | 2.924505  | -1.438924 | -4.916340 |
| C | 5.045000  | -2.159786 | -3.258940 |
| H | 5.612194  | -2.038755 | -2.311217 |
| H | 5.372669  | -3.097328 | -3.756589 |
| H | 5.288810  | -1.300102 | -3.919398 |
| C | -0.927519 | -1.850294 | 1.775863  |
| C | -1.798127 | -1.269630 | 2.772267  |
| H | -1.476670 | -1.276770 | 3.819720  |
| B | -1.376637 | -2.539519 | 0.516832  |
| O | -0.507763 | -3.099115 | -0.411978 |
| O | -2.715443 | -2.813018 | 0.144280  |
| C | -1.271958 | -3.488162 | -1.558311 |
| C | -2.659901 | -3.793624 | -0.919318 |
| C | -1.325731 | -2.302739 | -2.513429 |
| H | -0.303133 | -1.994251 | -2.763620 |
| H | -1.840591 | -2.552321 | -3.452321 |
| H | -1.823172 | -1.436817 | -2.053947 |
| C | -0.604067 | -4.676883 | -2.216161 |
| H | -1.228503 | -5.087762 | -3.022928 |
| H | 0.352714  | -4.371764 | -2.660524 |
| H | -0.395913 | -5.476788 | -1.494465 |
| C | -2.709242 | -5.170372 | -0.274827 |
| H | -2.736146 | -5.973555 | -1.024474 |
| H | -1.838470 | -5.334605 | 0.374995  |
| H | -3.613279 | -5.256517 | 0.343662  |
| C | -3.838814 | -3.601162 | -1.848296 |
| H | -3.898530 | -2.574338 | -2.234998 |

|    |           |           |           |
|----|-----------|-----------|-----------|
| H  | -3.764792 | -4.271575 | -2.716602 |
| H  | -4.781082 | -3.845407 | -1.335107 |
| Na | -4.468180 | -1.221056 | 0.134677  |
| H  | -2.871044 | -1.482512 | 2.689668  |
| H  | 0.135673  | -1.912399 | 2.033224  |
| H  | -2.013165 | 0.362837  | 2.889995  |
| O  | -5.300714 | -0.567415 | 2.213889  |
| O  | -6.766569 | -1.520096 | -0.476071 |
| C  | -7.048921 | -1.777651 | -1.812487 |
| H  | -6.211433 | -1.400721 | -2.439196 |
| H  | -7.144540 | -2.872640 | -1.971382 |
| C  | -7.510313 | -0.407489 | -0.088022 |
| H  | -8.161631 | -0.694402 | 0.765340  |
| H  | -6.829590 | 0.401572  | 0.249811  |
| C  | -8.362786 | 0.076927  | -1.245377 |
| H  | -7.896139 | 0.970224  | -1.716933 |
| H  | -9.399641 | 0.318224  | -0.924545 |
| C  | -8.332442 | -1.077347 | -2.192718 |
| H  | -9.201143 | -1.747355 | -2.006928 |
| H  | -8.325524 | -0.745483 | -3.253738 |
| C  | -5.843034 | -1.473152 | 3.113559  |
| H  | -5.533523 | -2.503559 | 2.837229  |
| H  | -6.953344 | -1.413756 | 3.070770  |
| C  | -5.118887 | 0.622400  | 2.906272  |
| H  | -4.226902 | 1.148551  | 2.511085  |
| H  | -6.005869 | 1.275549  | 2.749927  |
| C  | -4.942003 | 0.315657  | 4.382460  |
| H  | -3.881705 | 0.449422  | 4.690293  |
| H  | -5.593880 | 0.970460  | 5.001298  |
| C  | -5.350118 | -1.125915 | 4.502851  |
| H  | -4.471998 | -1.755165 | 4.768461  |
| H  | -6.152443 | -1.263559 | 5.260208  |

165

Figure\_S5\_imid-3\_modeR1\_ts(CuHadd)\_03 / electronic energy: -3525.625530169199 a.u. / lowest freq: -756.87 cm<sup>-1</sup>

|    |           |           |           |
|----|-----------|-----------|-----------|
| C  | -0.279975 | 3.246934  | -1.097823 |
| H  | -0.852358 | 2.932076  | -1.985656 |
| C  | 1.126176  | 2.628600  | -1.053436 |
| H  | 1.854952  | 3.287577  | -0.549750 |
| C  | -0.270789 | 1.473027  | 0.465255  |
| C  | -2.239523 | 2.949093  | 0.499789  |
| C  | -2.384092 | 3.920432  | 1.494831  |
| C  | -3.397091 | 2.407909  | -0.085070 |
| C  | -3.644164 | 4.372803  | 1.879387  |
| H  | -1.489250 | 4.313946  | 1.980587  |
| C  | -4.657125 | 2.875291  | 0.287827  |
| C  | -4.784037 | 3.864846  | 1.260371  |
| H  | -3.731812 | 5.127759  | 2.663371  |
| H  | -5.534967 | 2.432683  | -0.186976 |
| H  | -5.774910 | 4.225312  | 1.545331  |
| C  | 1.943371  | 0.571623  | 0.148328  |
| C  | 3.062947  | 1.079691  | 0.821636  |
| C  | 1.943288  | -0.762259 | -0.280770 |
| C  | 4.180949  | 0.268236  | 1.043984  |
| C  | 3.058582  | -1.584713 | -0.047173 |
| C  | 4.178991  | -1.060012 | 0.607729  |
| H  | 5.058325  | -1.675813 | 0.755091  |
| S  | -3.297961 | 0.970474  | -1.149641 |
| O  | -4.695007 | 0.609497  | -1.493076 |
| O  | -2.709085 | -0.063568 | -0.227105 |
| O  | -2.435317 | 1.309100  | -2.293396 |
| Cu | -1.139816 | 0.117930  | 1.540799  |
| C  | -0.279541 | 4.751640  | -0.989469 |
| C  | -0.872995 | 5.528518  | -2.000044 |
| C  | 0.300772  | 5.399882  | 0.117524  |
| C  | -0.886277 | 6.923270  | -1.904052 |
| H  | -1.327303 | 5.056734  | -2.862413 |
| C  | 0.284093  | 6.794390  | 0.209332  |
| H  | 0.756465  | 4.825690  | 0.914468  |
| C  | -0.308601 | 7.555620  | -0.800588 |
| H  | -1.345783 | 7.514271  | -2.685722 |
| H  | 0.729096  | 7.284896  | 1.065342  |
| H  | -0.321098 | 8.635400  | -0.727721 |
| C  | 1.657312  | 2.256864  | -2.414081 |
| C  | 2.824892  | 2.865754  | -2.906570 |
| C  | 1.012535  | 1.282125  | -3.198107 |
| C  | 3.332104  | 2.511475  | -4.159926 |
| H  | 3.342586  | 3.616061  | -2.322864 |
| C  | 1.513424  | 0.943831  | -4.457082 |
| H  | 0.126803  | 0.780236  | -2.833163 |
| C  | 2.674580  | 1.554703  | -4.936499 |
| H  | 4.233539  | 2.981998  | -4.530614 |
| H  | 1.006919  | 0.198578  | -5.056606 |
| H  | 3.066856  | 1.283468  | -5.907990 |
| N  | -0.925241 | 2.590179  | 0.069672  |
| N  | 0.887539  | 1.436415  | -0.220844 |
| H  | 1.103609  | -1.133360 | -0.846532 |
| H  | 3.079886  | 2.114538  | 1.141278  |
| C  | 3.098496  | -2.978284 | -0.546956 |

|    |           |           |           |
|----|-----------|-----------|-----------|
| C  | 2.958776  | -4.068278 | 0.363656  |
| C  | 3.411689  | -3.233423 | -1.914685 |
| C  | 3.099416  | -5.381539 | -0.119822 |
| C  | 3.555436  | -4.567584 | -2.340460 |
| C  | 3.383505  | -5.624934 | -1.456749 |
| H  | 3.014363  | -6.229551 | 0.546260  |
| H  | 3.828847  | -4.800124 | -3.360218 |
| H  | 3.501229  | -6.642939 | -1.805479 |
| C  | 5.389030  | 0.833481  | 1.671111  |
| C  | 6.363888  | 1.485529  | 0.864920  |
| C  | 5.577446  | 0.727634  | 3.076907  |
| C  | 7.504565  | 2.026462  | 1.485756  |
| C  | 6.732346  | 1.290549  | 3.650275  |
| C  | 7.682317  | 1.931124  | 2.861854  |
| H  | 8.266146  | 2.527412  | 0.902755  |
| H  | 6.903807  | 1.233750  | 4.717154  |
| H  | 8.565770  | 2.355607  | 3.321341  |
| C  | 4.565570  | 0.024795  | 3.982111  |
| H  | 3.721585  | -0.389887 | 3.394016  |
| C  | 3.945222  | 1.007939  | 4.981686  |
| H  | 3.485390  | 1.860787  | 4.437725  |
| H  | 3.149260  | 0.501698  | 5.568687  |
| H  | 4.707184  | 1.400257  | 5.687725  |
| C  | 5.203245  | -1.168394 | 4.704652  |
| H  | 5.678554  | -1.848990 | 3.966780  |
| H  | 5.972505  | -0.836282 | 5.433074  |
| H  | 4.424607  | -1.740262 | 5.253352  |
| C  | 6.214752  | 1.609810  | -0.652937 |
| H  | 5.272906  | 1.142602  | -1.005880 |
| C  | 7.346199  | 0.874732  | -1.381217 |
| H  | 7.159696  | 0.880730  | -2.476616 |
| H  | 8.328889  | 1.354445  | -1.188888 |
| H  | 7.389613  | -0.182860 | -1.043516 |
| C  | 6.143636  | 3.079575  | -1.083790 |
| H  | 5.946536  | 3.146322  | -2.175119 |
| H  | 5.314547  | 3.590575  | -0.548868 |
| H  | 7.093825  | 3.611290  | -0.867248 |
| C  | 3.706764  | -2.107680 | -2.908455 |
| H  | 3.416754  | -1.121722 | -2.493741 |
| C  | 2.729018  | -3.860017 | 1.860961  |
| H  | 2.499085  | -2.797722 | 2.077698  |
| C  | 1.533154  | -4.673152 | 2.380927  |
| H  | 0.657154  | -4.548139 | 1.714868  |
| H  | 1.772790  | -5.755240 | 2.444521  |
| H  | 1.251694  | -4.322300 | 3.396799  |
| C  | 3.995772  | -4.206200 | 2.651896  |
| H  | 4.249460  | -5.282637 | 2.547545  |
| H  | 4.852711  | -3.603305 | 2.285534  |
| H  | 3.846485  | -3.978994 | 3.729052  |
| C  | 2.911354  | -2.262727 | -4.212865 |
| H  | 3.221880  | -3.162115 | -4.782575 |
| H  | 1.826411  | -2.330974 | -3.994525 |
| H  | 3.083322  | -1.382592 | -4.865962 |
| C  | 5.209969  | -2.030262 | -3.194556 |
| H  | 5.769196  | -1.893329 | -2.244279 |
| H  | 5.568767  | -2.956190 | -3.692454 |
| H  | 5.429721  | -1.162270 | -3.852604 |
| C  | -0.781375 | -1.916726 | 1.818309  |
| C  | -1.665059 | -1.366904 | 2.821092  |
| H  | -1.313534 | -1.329024 | 3.858384  |
| B  | -1.213300 | -2.627168 | 0.565391  |
| O  | -0.329903 | -3.152332 | -0.369867 |
| O  | -2.542703 | -2.941715 | 0.198218  |
| C  | -1.081605 | -3.532878 | -1.526418 |
| C  | -2.468378 | -3.878199 | -0.902988 |
| C  | -1.156000 | -2.330523 | -2.458057 |
| H  | -0.140274 | -2.008177 | -2.718091 |
| H  | -1.681349 | -2.565776 | -3.394737 |
| H  | -1.656137 | -1.479272 | -1.974887 |
| C  | -0.385548 | -4.694459 | -2.203384 |
| H  | -0.990574 | -5.094825 | -3.030003 |
| H  | 0.572973  | -4.362434 | -2.624176 |
| H  | -0.175616 | -5.508770 | -1.498579 |
| C  | -2.507247 | -5.279400 | -0.314474 |
| H  | -2.513821 | -6.052718 | -1.095530 |
| H  | -1.641638 | -5.457091 | 0.338815  |
| H  | -3.416805 | -5.402473 | 0.289592  |
| C  | -3.643782 | -3.653637 | -1.830042 |
| H  | -3.714746 | -2.605923 | -2.155030 |
| H  | -3.554992 | -4.272246 | -2.734697 |
| H  | -4.586945 | -3.940230 | -1.340217 |
| Na | -4.418426 | -1.480501 | 0.288808  |
| H  | -2.723158 | -1.655006 | 2.779038  |
| H  | 0.287531  | -1.918346 | 2.057645  |
| H  | -1.976917 | 0.242554  | 2.902245  |
| O  | -5.159324 | -0.877756 | 2.446049  |
| O  | -6.751930 | -1.664681 | -0.388132 |
| C  | -7.465689 | -0.506161 | -0.090692 |

|   |           |           |           |
|---|-----------|-----------|-----------|
| H | -8.246730 | -0.752868 | 0.660047  |
| H | -6.786194 | 0.253678  | 0.348644  |
| C | -6.992804 | -1.986703 | -1.720035 |
| H | -6.080771 | -1.768049 | -2.315530 |
| H | -7.219171 | -3.070532 | -1.808126 |
| C | -8.149437 | -1.161883 | -2.239225 |
| H | -9.104299 | -1.717267 | -2.105296 |
| H | -8.015867 | -0.884365 | -3.307466 |
| C | -8.121638 | 0.032727  | -1.344984 |
| H | -7.492387 | 0.832434  | -1.794499 |
| H | -9.143175 | 0.423176  | -1.144760 |
| C | -4.883438 | 0.349281  | 3.031401  |
| H | -4.367271 | 1.005810  | 2.304521  |
| H | -4.217975 | 0.201100  | 3.911256  |
| C | -6.245526 | -1.397964 | 3.138083  |
| H | -6.856701 | -2.024288 | 2.455157  |
| H | -5.878304 | -2.042354 | 3.967490  |
| C | -7.071649 | -0.244969 | 3.687663  |
| H | -8.029707 | -0.139142 | 3.133431  |
| H | -7.281802 | -0.394626 | 4.769411  |
| C | -6.195525 | 0.958472  | 3.470248  |
| H | -6.610054 | 1.596559  | 2.658656  |
| H | -6.074576 | 1.557835  | 4.398704  |

165

Figure\_S5\_imid-3\_modeR1\_prod(CuHadd) / electronic energy: -3525.669421393887 a.u. / lowest freq: 13.75 cm<sup>-1</sup>

|    |           |           |           |
|----|-----------|-----------|-----------|
| C  | -0.012502 | 3.387771  | -1.037975 |
| H  | -0.558164 | 3.197892  | -1.977180 |
| C  | 1.337211  | 2.652468  | -0.975937 |
| H  | 2.116155  | 3.244643  | -0.465810 |
| C  | -0.222614 | 1.541802  | 0.431756  |
| C  | -2.099316 | 3.157836  | 0.368134  |
| C  | -2.244534 | 4.095226  | 1.396499  |
| C  | -3.235577 | 2.793604  | -0.376544 |
| C  | -3.470298 | 4.711471  | 1.640585  |
| H  | -1.372131 | 4.349968  | 2.001472  |
| C  | -4.461137 | 3.411857  | -0.129416 |
| C  | -4.576864 | 4.388074  | 0.857979  |
| H  | -3.555277 | 5.449025  | 2.441241  |
| H  | -5.324996 | 3.102031  | -0.720489 |
| H  | -5.538023 | 4.876712  | 1.031300  |
| C  | 1.953361  | 0.513788  | 0.215892  |
| C  | 3.132084  | 0.909578  | 0.863496  |
| C  | 1.800819  | -0.821191 | -0.183260 |
| C  | 4.157724  | -0.014852 | 1.091426  |
| C  | 2.833514  | -1.748340 | 0.030107  |
| C  | 4.010789  | -1.339142 | 0.667692  |
| H  | 4.822874  | -2.042582 | 0.809871  |
| S  | -3.180093 | 1.457995  | -1.577558 |
| O  | -4.599176 | 1.151452  | -1.892723 |
| O  | -2.564875 | 0.330739  | -0.798298 |
| O  | -2.362692 | 1.916392  | -2.713856 |
| Cu | -1.069692 | -0.048963 | 1.140002  |
| C  | 0.106837  | 4.874214  | -0.805853 |
| C  | -0.366418 | 5.778058  | -1.773305 |
| C  | 0.676817  | 5.378496  | 0.378729  |
| C  | -0.271897 | 7.156460  | -1.559161 |
| H  | -0.811149 | 5.418162  | -2.692701 |
| C  | 0.768311  | 6.757230  | 0.588402  |
| H  | 1.039937  | 4.703882  | 1.144095  |
| C  | 0.294629  | 7.645616  | -0.379680 |
| H  | -0.639470 | 7.846003  | -2.308053 |
| H  | 1.204421  | 7.136895  | 1.503300  |
| H  | 0.365515  | 8.713039  | -0.215445 |
| C  | 1.848515  | 2.233349  | -2.331044 |
| C  | 3.061318  | 2.748991  | -2.819984 |
| C  | 1.142154  | 1.295989  | -3.107762 |
| C  | 3.556767  | 2.334509  | -4.059646 |
| H  | 3.624107  | 3.471580  | -2.243271 |
| C  | 1.635889  | 0.892206  | -4.350230 |
| H  | 0.215838  | 0.870510  | -2.746624 |
| C  | 2.843828  | 1.408705  | -4.825021 |
| H  | 4.493643  | 2.732482  | -4.427402 |
| H  | 1.086214  | 0.170597  | -4.940629 |
| H  | 3.228872  | 1.088932  | -5.784564 |
| N  | -0.785839 | 2.706447  | 0.038196  |
| N  | 0.989239  | 1.481009  | -0.151458 |
| H  | 0.910563  | -1.114278 | -0.714822 |
| H  | 3.262971  | 1.940397  | 1.168983  |
| C  | 2.737196  | -3.131432 | -0.488122 |
| C  | 2.417592  | -4.202847 | 0.396316  |
| C  | 3.130337  | -3.410740 | -1.830045 |
| C  | 2.503058  | -5.524516 | -0.077583 |
| C  | 3.209364  | -4.752352 | -2.248336 |
| C  | 2.887107  | -5.791970 | -1.385198 |
| H  | 2.295613  | -6.362264 | 0.574129  |
| H  | 3.545416  | -5.006216 | -3.243914 |
| H  | 2.958472  | -6.816806 | -1.726397 |
| C  | 5.416879  | 0.421764  | 1.723051  |

|    |           |           |           |
|----|-----------|-----------|-----------|
| C  | 6.445052  | 1.000690  | 0.927097  |
| C  | 5.593836  | 0.281633  | 3.127836  |
| C  | 7.621650  | 1.444953  | 1.557741  |
| C  | 6.788437  | 0.743242  | 3.710355  |
| C  | 7.787466  | 1.318247  | 2.932552  |
| H  | 8.420839  | 1.894772  | 0.983480  |
| H  | 6.951576  | 0.660522  | 4.776833  |
| H  | 8.699615  | 1.667311  | 3.399404  |
| C  | 4.525890  | -0.345748 | 4.024139  |
| H  | 3.656709  | -0.693238 | 3.429417  |
| C  | 3.976457  | 0.678726  | 5.023607  |
| H  | 3.583838  | 1.564673  | 4.479864  |
| H  | 3.142580  | 0.232056  | 5.606307  |
| H  | 4.762921  | 1.011663  | 5.733322  |
| C  | 5.065991  | -1.586456 | 4.746812  |
| H  | 5.500108  | -2.296244 | 4.011049  |
| H  | 5.847954  | -1.315599 | 5.486924  |
| H  | 4.240940  | -2.102672 | 5.282690  |
| C  | 6.313623  | 1.152926  | -0.589356 |
| H  | 5.351861  | 0.737948  | -0.954323 |
| C  | 7.411865  | 0.372784  | -1.322611 |
| H  | 7.222934  | 0.390207  | -2.417415 |
| H  | 8.414457  | 0.810482  | -1.133261 |
| H  | 7.413716  | -0.686343 | -0.987590 |
| C  | 6.323046  | 2.630857  | -0.996321 |
| H  | 6.147288  | 2.725290  | -2.089135 |
| H  | 5.512879  | 3.174390  | -0.464565 |
| H  | 7.295307  | 3.109874  | -0.755604 |
| C  | 3.570372  | -2.306871 | -2.794306 |
| H  | 3.270358  | -1.309329 | -2.414244 |
| C  | 2.058550  | -3.965742 | 1.862810  |
| H  | 1.835160  | -2.892773 | 2.036701  |
| C  | 0.799082  | -4.739542 | 2.285942  |
| H  | -0.004652 | -4.619147 | 1.532300  |
| H  | 1.007184  | -5.823345 | 2.406240  |
| H  | 0.427955  | -4.352764 | 3.259086  |
| C  | 3.239876  | -4.331027 | 2.767865  |
| H  | 3.475701  | -5.414239 | 2.695021  |
| H  | 4.139868  | -3.752477 | 2.473947  |
| H  | 3.000506  | -4.087316 | 3.824962  |
| C  | 2.912798  | -2.439151 | -4.176732 |
| H  | 3.288343  | -3.325314 | -4.728324 |
| H  | 1.811580  | -2.518915 | -4.075991 |
| H  | 3.143726  | -1.544104 | -4.790758 |
| C  | 5.096629  | -2.289996 | -2.920734 |
| H  | 5.557970  | -2.166017 | -1.918122 |
| H  | 5.467800  | -3.235301 | -3.371061 |
| H  | 5.418218  | -1.438347 | -3.557811 |
| C  | -1.511651 | -1.896408 | 1.742910  |
| C  | -2.598261 | -2.109568 | 2.784483  |
| H  | -2.692148 | -3.162817 | 3.115048  |
| B  | -1.733601 | -2.514373 | 0.374407  |
| O  | -0.767871 | -3.012719 | -0.488287 |
| O  | -3.009348 | -2.651878 | -0.212910 |
| C  | -1.357497 | -3.244688 | -1.776598 |
| C  | -2.878360 | -3.412931 | -1.432064 |
| C  | -1.085241 | -2.029250 | -2.650128 |
| H  | -0.002055 | -1.876972 | -2.732529 |
| H  | -1.478365 | -2.161183 | -3.668127 |
| H  | -1.520799 | -1.118558 | -2.219746 |
| C  | -0.719291 | -4.476443 | -2.386907 |
| H  | -1.216216 | -4.756429 | -3.327201 |
| H  | 0.334611  | -4.274639 | -2.617942 |
| H  | -0.751789 | -5.336209 | -1.706510 |
| C  | -3.257684 | -4.846934 | -1.099529 |
| H  | -3.232978 | -5.497674 | -1.984760 |
| H  | -2.584324 | -5.270939 | -0.341448 |
| H  | -4.278247 | -4.870492 | -0.692190 |
| C  | -3.817020 | -2.836532 | -2.472916 |
| H  | -3.668562 | -1.755305 | -2.598975 |
| H  | -3.664226 | -3.315766 | -3.450883 |
| H  | -4.865059 | -3.000973 | -2.186814 |
| Na | -4.326273 | -0.819104 | 0.046573  |
| H  | -3.597290 | -1.828096 | 2.413789  |
| H  | -0.521135 | -2.174091 | 2.141297  |
| H  | -2.448060 | -1.520206 | 3.704144  |
| O  | -5.029797 | 0.341877  | 1.946189  |
| O  | -6.458836 | -1.473578 | -0.431994 |
| C  | -7.392412 | -0.504667 | -0.772059 |
| H  | -7.023910 | 0.493505  | -0.453372 |
| H  | -7.527328 | -0.495999 | -1.876358 |
| C  | -7.166987 | -2.637889 | -0.175147 |
| H  | -7.257395 | -3.228531 | -1.113837 |
| H  | -6.619575 | -3.248317 | 0.574194  |
| C  | -8.539895 | -2.261946 | 0.346033  |
| H  | -8.569050 | -2.342552 | 1.455143  |
| H  | -9.326609 | -2.911091 | -0.096750 |
| C  | -8.702933 | -0.828567 | -0.079848 |



|   |           |           |           |
|---|-----------|-----------|-----------|
| H | -9.560496 | -0.708068 | -0.777374 |
| H | -8.848429 | -0.173416 | 0.807343  |
| C | -6.067239 | -0.140998 | 2.730263  |
| H | -6.370154 | -1.146496 | 2.371401  |
| H | -6.939375 | 0.544756  | 2.647101  |
| C | -4.233352 | 1.137041  | 2.763276  |
| H | -3.164428 | 0.960093  | 2.519116  |
| H | -4.466089 | 2.202863  | 2.570029  |
| C | -4.506976 | 0.811185  | 4.222383  |
| H | -3.600935 | 0.410243  | 4.726255  |
| H | -4.858026 | 1.717920  | 4.762942  |
| C | -5.594421 | -0.219641 | 4.163780  |
| H | -5.178594 | -1.229611 | 4.374340  |
| H | -6.417144 | 0.004491  | 4.877115  |

165

Figure\_S5\_imid-3\_modeR2\_ed(CuHadd) / electronic energy: -3525.644171244942 a.u. / lowest freq: 15.57 cm-1

|    |           |           |           |
|----|-----------|-----------|-----------|
| C  | -2.212307 | -0.824856 | 2.232479  |
| H  | -2.806118 | 0.076153  | 2.451495  |
| C  | -0.699649 | -0.598728 | 2.383860  |
| H  | -0.162713 | -1.536938 | 2.619960  |
| C  | -1.227327 | -0.647097 | 0.100653  |
| C  | -3.483548 | -1.527457 | 0.108814  |
| C  | -3.419039 | -2.741515 | -0.581623 |
| C  | -4.685587 | -0.798694 | 0.112443  |
| C  | -4.531916 | -3.243537 | -1.247953 |
| H  | -2.472252 | -3.285867 | -0.593194 |
| C  | -5.805723 | -1.325152 | -0.537984 |
| C  | -5.735455 | -2.540161 | -1.213188 |
| H  | -4.455926 | -4.191163 | -1.786403 |
| H  | -6.727820 | -0.741127 | -0.533030 |
| H  | -6.619575 | -2.930471 | -1.722115 |
| C  | 0.955376  | 0.177684  | 0.637178  |
| C  | 1.276987  | 1.531900  | 0.509404  |
| C  | 1.941163  | -0.793177 | 0.428840  |
| C  | 2.580622  | 1.920940  | 0.184148  |
| C  | 3.261237  | -0.408926 | 0.144740  |
| C  | 3.579025  | 0.952423  | 0.033114  |
| H  | 4.595752  | 1.256561  | -0.184929 |
| S  | -4.863626 | 0.822783  | 0.875885  |
| O  | -5.976230 | 1.474573  | 0.121545  |
| O  | -3.578685 | 1.538462  | 0.622965  |
| O  | -5.161171 | 0.580930  | 2.299252  |
| Cu | -0.833704 | -0.529337 | -1.824217 |
| C  | -2.722345 | -1.979685 | 3.054763  |
| C  | -3.605062 | -1.752696 | 4.124917  |
| C  | -2.317153 | -3.295407 | 2.773046  |
| C  | -4.082234 | -2.823870 | 4.886672  |
| H  | -3.918846 | -0.747796 | 4.376329  |
| C  | -2.796141 | -4.364135 | 3.534948  |
| H  | -1.634899 | -3.488204 | 1.959944  |
| C  | -3.679912 | -4.128762 | 4.590697  |
| H  | -4.762629 | -2.641708 | 5.708431  |
| H  | -2.481602 | -5.374302 | 3.306665  |
| H  | -4.050460 | -4.956641 | 5.181180  |
| C  | -0.351048 | 0.453015  | 3.404943  |
| C  | 0.468907  | 0.128505  | 4.500240  |
| C  | -0.831114 | 1.769262  | 3.277906  |
| C  | 0.783959  | 1.097083  | 5.457822  |
| H  | 0.862252  | -0.873788 | 4.617021  |
| C  | -0.520624 | 2.731724  | 4.241333  |
| H  | -1.445397 | 2.048379  | 2.433536  |
| C  | 0.283087  | 2.395054  | 5.332843  |
| H  | 1.414058  | 0.840009  | 6.299370  |
| H  | -0.898120 | 3.740827  | 4.137891  |
| H  | 0.526002  | 3.142839  | 6.076537  |
| N  | -2.307834 | -1.086314 | 0.771956  |
| N  | -0.351170 | -0.195788 | 1.014017  |
| H  | 1.688341  | -1.840627 | 0.525040  |
| H  | 0.515463  | 2.279967  | 0.669083  |
| C  | 4.322388  | -1.431928 | 0.017416  |
| C  | 4.728456  | -2.176358 | 1.164419  |
| C  | 4.945977  | -1.671318 | -1.243427 |
| C  | 5.706425  | -3.176013 | 1.013753  |
| C  | 5.954515  | -2.649457 | -1.325683 |
| C  | 6.314985  | -3.402127 | -0.214590 |
| H  | 6.019431  | -3.775456 | 1.858323  |
| H  | 6.459678  | -2.846684 | -2.261749 |
| H  | 7.079034  | -4.163573 | -0.304844 |
| C  | 2.893271  | 3.346898  | -0.028785 |
| C  | 2.760595  | 3.913078  | -1.328351 |
| C  | 3.321094  | 4.154812  | 1.060723  |
| C  | 3.049910  | 5.278038  | -1.507019 |
| C  | 3.620374  | 5.509342  | 0.824698  |
| C  | 3.477141  | 6.063069  | -0.442442 |
| H  | 2.952234  | 5.741384  | -2.479898 |
| H  | 3.964113  | 6.148228  | 1.627304  |
| H  | 3.703037  | 7.109645  | -0.601676 |
| C  | 3.472050  | 3.597788  | 2.475421  |

|    |           |           |           |
|----|-----------|-----------|-----------|
| H  | 3.132976  | 2.542924  | 2.529098  |
| C  | 2.601986  | 4.371508  | 3.473645  |
| H  | 1.550423  | 4.398692  | 3.117247  |
| H  | 2.626663  | 3.869933  | 4.464027  |
| H  | 2.961781  | 5.413122  | 3.605951  |
| C  | 4.942032  | 3.600089  | 2.908908  |
| H  | 5.551301  | 3.020795  | 2.182278  |
| H  | 5.341494  | 4.634554  | 2.969560  |
| H  | 5.045437  | 3.121781  | 3.906398  |
| C  | 2.320235  | 3.086250  | -2.536835 |
| H  | 2.148490  | 2.027354  | -2.257728 |
| C  | 3.407850  | 3.066577  | -3.617367 |
| H  | 3.136872  | 2.343744  | -4.416509 |
| H  | 3.537536  | 4.068266  | -4.078425 |
| H  | 4.375196  | 2.748734  | -3.174079 |
| C  | 0.989961  | 3.596937  | -3.102049 |
| H  | 0.654039  | 2.944718  | -3.936191 |
| H  | 0.212778  | 3.571172  | -2.310750 |
| H  | 1.082025  | 4.635590  | -3.482928 |
| C  | 4.563287  | -0.903859 | -2.511410 |
| H  | 3.703496  | -0.229616 | -2.328673 |
| C  | 4.164321  | -1.904772 | 2.561932  |
| H  | 3.474662  | -1.037903 | 2.557454  |
| C  | 3.354997  | -3.102621 | 3.073630  |
| H  | 2.531784  | -3.337577 | 2.366647  |
| H  | 3.996743  | -4.001335 | 3.189201  |
| H  | 2.901462  | -2.862353 | 4.059012  |
| C  | 5.275338  | -1.527140 | 3.550842  |
| H  | 5.956659  | -2.382003 | 3.743763  |
| H  | 5.867038  | -0.676299 | 3.149978  |
| H  | 4.830003  | -1.212214 | 4.518972  |
| C  | 4.110103  | -1.847341 | -3.632514 |
| H  | 4.943180  | -2.486112 | -3.992690 |
| H  | 3.290789  | -2.496639 | -3.270106 |
| H  | 3.725810  | -1.257958 | -4.492439 |
| C  | 5.724755  | -0.021481 | -2.984353 |
| H  | 6.018512  | 0.685914  | -2.180254 |
| H  | 6.607960  | -0.634858 | -3.261522 |
| H  | 5.417398  | 0.569854  | -3.872857 |
| C  | -0.993886 | -2.255371 | -2.936977 |
| C  | -0.406236 | -1.187297 | -3.646665 |
| H  | -0.953608 | -0.632452 | -4.412496 |
| B  | -0.197719 | -3.375763 | -2.260583 |
| O  | -0.773866 | -4.545108 | -1.797129 |
| O  | 1.172604  | -3.380334 | -2.103944 |
| C  | 0.265780  | -5.312085 | -1.142664 |
| C  | 1.560860  | -4.739772 | -1.804509 |
| C  | 0.190330  | -5.010705 | 0.343440  |
| H  | -0.797927 | -5.303679 | 0.721877  |
| H  | 0.943581  | -5.570005 | 0.914902  |
| H  | 0.336147  | -3.938837 | 0.541906  |
| C  | 0.025416  | -6.784259 | -1.395975 |
| H  | 0.852086  | -7.389643 | -0.996717 |
| H  | -0.896777 | -7.110638 | -0.896556 |
| H  | -0.077415 | -7.003897 | -2.465177 |
| C  | 1.886748  | -5.418161 | -3.126618 |
| H  | 2.245089  | -6.446378 | -2.979654 |
| H  | 1.010706  | -5.451574 | -3.789311 |
| H  | 2.676661  | -4.858819 | -3.644350 |
| C  | 2.775049  | -4.731266 | -0.903886 |
| H  | 2.627127  | -4.095056 | -0.024640 |
| H  | 3.013866  | -5.747226 | -0.558228 |
| H  | 3.647911  | -4.355725 | -1.451486 |
| Na | -4.558250 | 3.163514  | -0.855547 |
| H  | 0.683944  | -1.135138 | -3.751899 |
| H  | -2.073349 | -2.412521 | -3.068831 |
| H  | -0.477739 | 0.991914  | -2.080398 |
| O  | -2.771205 | 4.642339  | -0.705134 |
| O  | -3.996487 | 2.068220  | -2.793991 |
| C  | -1.793351 | 4.115023  | 0.126693  |
| H  | -2.239660 | 3.890781  | 1.117565  |
| H  | -1.414042 | 3.168522  | -0.316686 |
| C  | -2.140862 | 5.557381  | -1.535732 |
| H  | -1.825647 | 5.049028  | -2.472796 |
| H  | -2.850216 | 6.370078  | -1.799859 |
| C  | -0.933605 | 6.122960  | -0.814073 |
| H  | -1.172853 | 7.119323  | -0.381322 |
| H  | -0.062311 | 6.212975  | -1.499321 |
| C  | -0.673044 | 5.127295  | 0.279962  |
| H  | 0.318761  | 4.646256  | 0.155454  |
| H  | -0.721171 | 5.618901  | 1.276632  |
| C  | -3.062185 | 2.518776  | -3.716142 |
| H  | -2.047166 | 2.473747  | -3.264963 |
| H  | -3.282872 | 3.574770  | -3.979670 |
| C  | -4.143444 | 0.708103  | -3.022295 |
| H  | -3.394105 | 0.148252  | -2.419452 |
| H  | -5.161392 | 0.388015  | -2.718147 |
| C  | -3.134758 | 1.641156  | -4.952610 |

H -2.117255 1.346710 -5.288686  
H -3.659556 2.169494 -5.778875  
C -3.932276 0.449046 -4.498894  
H -4.911084 0.416880 -5.026574  
H -3.387729 -0.504707 -4.667205  
165

Figure\_S5\_imid-3\_modeR2\_ts(CuHadd)\_01 / electronic energy: -3525.630124745377 a.u. / lowest freq: -778.17 cm-1

C -2.207389 -0.680284 2.306579  
H -2.776977 0.239876 2.508860  
C -0.687147 -0.487563 2.455174  
H -0.174131 -1.429392 2.726334  
C -1.215554 -0.582695 0.171647  
C -3.484055 -1.412612 0.187368  
C -3.406245 -2.617917 -0.519531  
C -4.688120 -0.688884 0.186212  
C -4.514165 -3.122498 -1.191083  
H -2.453130 -3.150191 -0.545935  
C -5.805550 -1.221112 -0.465951  
C -5.725306 -2.431687 -1.147550  
H -4.425952 -4.062414 -1.741295  
H -6.731210 -0.642670 -0.461523  
H -6.606323 -2.826450 -1.658519  
C 0.991910 0.181540 0.687539  
C 1.342545 1.517253 0.481955  
C 1.953113 -0.822418 0.528646  
C 2.655314 1.859270 0.145079  
C 3.282906 -0.485152 0.227293  
C 3.633587 0.862701 0.054827  
H 4.656638 1.132734 -0.176864  
S -4.863430 0.946404 0.918489  
O -5.955487 1.593862 0.130726  
O -3.567229 1.645892 0.669938  
O -5.181823 0.740355 2.342237  
Cu -0.891406 -0.731373 -1.697535  
C -2.744715 -1.805241 3.153400  
C -3.637213 -1.536380 4.205755  
C -2.355333 -3.134443 2.913584  
C -4.141260 -2.579210 4.989143  
H -3.937812 -0.520582 4.427150  
C -2.861366 -4.174665 3.697200  
H -1.661357 -3.360754 2.119166  
C -3.755859 -3.897550 4.733509  
H -4.829249 -2.364539 5.796612  
H -2.558624 -5.195199 3.501386  
H -4.147044 -4.703428 5.340880  
C -0.311926 0.591219 3.438152  
C 0.504716 0.287565 4.541897  
C -0.753911 1.914976 3.259717  
C 0.856458 1.285373 5.455790  
H 0.869964 -0.720110 4.697251  
C -0.406705 2.907010 4.179710  
H -1.364688 2.177846 2.407481  
C 0.396075 2.592230 5.278397  
H 1.485025 1.044580 6.303286  
H -0.753870 3.922080 4.036055  
H 0.668533 3.363022 5.987564  
N -2.312189 -0.970244 0.854476  
N -0.324249 -0.137758 1.075548  
H 1.672162 -1.856615 0.673843  
H 0.595117 2.288299 0.589064  
C 4.314544 -1.542940 0.129285  
C 4.683980 -2.282319 1.292403  
C 4.941708 -1.826820 -1.121695  
C 5.625213 -3.320038 1.167422  
C 5.913573 -2.843223 -1.177406  
C 6.235037 -3.590145 -0.050997  
H 5.909202 -3.915615 2.024901  
H 6.420798 -3.074403 -2.104525  
H 6.971122 -4.380721 -0.121130  
C 2.987959 3.261104 -0.169644  
C 2.826431 3.740768 -1.500121  
C 3.428585 4.140301 0.857348  
C 3.097019 5.094163 -1.771296  
C 3.711412 5.479077 0.529178  
C 3.538692 5.949116 -0.767976  
H 2.968625 5.494822 -2.768130  
H 4.059089 6.172046 1.283863  
H 3.748666 6.985853 -0.997700  
C 3.595405 3.680228 2.304542  
H 3.285833 2.622071 2.426964  
C 2.703441 4.494100 3.249938  
H 1.651947 4.468038 2.893223  
H 2.739876 4.060326 4.271631  
H 3.034042 5.552034 3.310427  
C 5.064482 3.749912 2.736074  
H 5.690519 3.145274 2.045269  
H 5.435332 4.796651 2.734901  
H 5.179945 3.335692 3.760537

|    |           |           |           |
|----|-----------|-----------|-----------|
| C  | 2.359203  | 2.835352  | -2.640698 |
| H  | 2.243068  | 1.787156  | -2.299395 |
| C  | 3.389616  | 2.791564  | -3.775690 |
| H  | 3.109030  | 2.008927  | -4.512877 |
| H  | 3.450895  | 3.765466  | -4.305091 |
| H  | 4.391707  | 2.541460  | -3.367560 |
| C  | 0.983999  | 3.269975  | -3.158079 |
| H  | 0.635104  | 2.571337  | -3.948292 |
| H  | 0.247909  | 3.247537  | -2.327267 |
| H  | 1.017314  | 4.295333  | -3.582699 |
| C  | 4.603024  | -1.067863 | -2.407722 |
| H  | 3.761977  | -0.365240 | -2.249765 |
| C  | 4.121937  | -1.965930 | 2.681172  |
| H  | 3.462114  | -1.076677 | 2.656811  |
| C  | 3.271266  | -3.127070 | 3.210397  |
| H  | 2.453862  | -3.359407 | 2.495818  |
| H  | 3.885899  | -4.039520 | 3.360602  |
| H  | 2.809076  | -2.848028 | 4.181453  |
| C  | 5.239935  | -1.607251 | 3.669335  |
| H  | 5.892395  | -2.480104 | 3.880641  |
| H  | 5.860941  | -0.783274 | 3.256903  |
| H  | 4.800436  | -1.261279 | 4.629504  |
| C  | 4.136393  | -2.012623 | -3.521981 |
| H  | 4.954512  | -2.679925 | -3.864173 |
| H  | 3.294880  | -2.632475 | -3.160472 |
| H  | 3.779006  | -1.423851 | -4.393916 |
| C  | 5.799474  | -0.230989 | -2.876565 |
| H  | 6.103959  | 0.480661  | -2.080489 |
| H  | 6.666608  | -0.877184 | -3.128894 |
| H  | 5.525467  | 0.354139  | -3.779857 |
| C  | -1.020570 | -2.225502 | -3.112228 |
| C  | -0.384700 | -1.030084 | -3.621300 |
| H  | -0.860088 | -0.486038 | -4.442614 |
| B  | -0.299991 | -3.352322 | -2.414943 |
| O  | -0.920000 | -4.530399 | -1.990926 |
| O  | 1.066565  | -3.385252 | -2.138403 |
| C  | 0.045030  | -5.262960 | -1.210110 |
| C  | 1.397113  | -4.742366 | -1.790910 |
| C  | -0.143227 | -4.863307 | 0.243969  |
| H  | -1.170991 | -5.100354 | 0.552297  |
| H  | 0.539996  | -5.399773 | 0.917078  |
| H  | 0.016651  | -3.782347 | 0.377038  |
| C  | -0.191593 | -6.746989 | -1.388847 |
| H  | 0.593242  | -7.333512 | -0.888930 |
| H  | -1.155144 | -7.035778 | -0.946916 |
| H  | -0.211804 | -7.030408 | -2.447988 |
| C  | 1.789799  | -5.469099 | -3.069622 |
| H  | 2.112021  | -6.501121 | -2.871835 |
| H  | 0.953818  | -5.501134 | -3.782370 |
| H  | 2.623847  | -4.944995 | -3.554344 |
| C  | 2.548354  | -4.750859 | -0.808695 |
| H  | 2.360348  | -4.096037 | 0.049255  |
| H  | 2.733911  | -5.766803 | -0.430429 |
| H  | 3.468748  | -4.409147 | -1.298428 |
| Na | -4.457351 | 3.195988  | -0.915775 |
| H  | 0.705658  | -1.051934 | -3.740670 |
| H  | -2.097779 | -2.335182 | -3.296144 |
| H  | -0.343717 | 0.365178  | -2.724616 |
| O  | -2.662392 | 4.693061  | -0.778341 |
| O  | -3.887323 | 1.977330  | -2.809739 |
| C  | -1.708046 | 4.201166  | 0.101391  |
| H  | -2.163289 | 4.082548  | 1.106726  |
| H  | -1.369740 | 3.204725  | -0.255787 |
| C  | -1.992733 | 5.506437  | -1.680906 |
| H  | -1.688805 | 4.904563  | -2.564599 |
| H  | -2.669090 | 6.317539  | -2.024493 |
| C  | -0.770559 | 6.089078  | -1.000178 |
| H  | -0.981412 | 7.121981  | -0.645342 |
| H  | 0.104202  | 6.100671  | -1.686754 |
| C  | -0.543186 | 5.172383  | 0.167543  |
| H  | 0.425597  | 4.639474  | 0.073729  |
| H  | -0.559216 | 5.742239  | 1.122657  |
| C  | -2.975547 | 2.369954  | -3.778247 |
| H  | -1.942801 | 2.215017  | -3.396450 |
| H  | -3.112451 | 3.448690  | -4.002558 |
| C  | -4.140383 | 0.631301  | -3.034870 |
| H  | -3.429147 | 0.017391  | -2.439108 |
| H  | -5.175432 | 0.391897  | -2.714417 |
| C  | -3.211371 | 1.540193  | -5.024068 |
| H  | -2.250171 | 1.246343  | -5.498166 |
| H  | -3.828399 | 2.107935  | -5.755104 |
| C  | -3.971362 | 0.346238  | -4.515213 |
| H  | -4.962802 | 0.274761  | -5.014516 |
| H  | -3.405854 | -0.596453 | -4.677717 |

165

Figure\_S5\_imid-3\_modeR2\_ts(CuHadd)\_02 / electronic energy: -3525.627351660013 a.u. / lowest freq: -758.39 cm<sup>-1</sup>

|   |           |           |          |
|---|-----------|-----------|----------|
| C | -2.263165 | -0.433494 | 2.420016 |
| H | -2.622097 | 0.568290  | 2.701650 |

|    |           |           |           |
|----|-----------|-----------|-----------|
| C  | -0.731726 | -0.558027 | 2.487362  |
| H  | -0.408989 | -1.606180 | 2.628534  |
| C  | -1.375243 | -0.349424 | 0.246352  |
| C  | -3.756452 | -0.709891 | 0.327341  |
| C  | -4.009189 | -1.866098 | -0.419511 |
| C  | -4.721972 | 0.309135  | 0.382701  |
| C  | -5.225091 | -2.033363 | -1.075385 |
| H  | -3.225445 | -2.624064 | -0.493593 |
| C  | -5.946073 | 0.121640  | -0.266423 |
| C  | -6.203635 | -1.042908 | -0.984589 |
| H  | -5.404904 | -2.940718 | -1.656399 |
| H  | -6.680499 | 0.928310  | -0.223487 |
| H  | -7.164472 | -1.168799 | -1.488765 |
| C  | 0.954091  | -0.004677 | 0.678599  |
| C  | 1.480204  | 1.270535  | 0.450211  |
| C  | 1.759444  | -1.133384 | 0.495800  |
| C  | 2.823905  | 1.422028  | 0.091342  |
| C  | 3.114525  | -0.988790 | 0.157955  |
| C  | 3.649351  | 0.296548  | -0.015453 |
| H  | 4.695816  | 0.419163  | -0.267384 |
| S  | -4.456717 | 1.895534  | 1.205261  |
| O  | -5.365794 | 2.832869  | 0.512270  |
| O  | -3.011692 | 2.208879  | 0.961171  |
| O  | -4.760079 | 1.671520  | 2.631961  |
| Cu | -1.148461 | -0.424610 | -1.640004 |
| C  | -2.982948 | -1.477583 | 3.232526  |
| C  | -3.761996 | -1.098883 | 4.339758  |
| C  | -2.882796 | -2.840351 | 2.904147  |
| C  | -4.434796 | -2.065038 | 5.094210  |
| H  | -3.844175 | -0.058109 | 4.625505  |
| C  | -3.556905 | -3.803638 | 3.659109  |
| H  | -2.284376 | -3.152009 | 2.062716  |
| C  | -4.333935 | -3.416151 | 4.753194  |
| H  | -5.033115 | -1.765980 | 5.945086  |
| H  | -3.475943 | -4.850368 | 3.395894  |
| H  | -4.855380 | -4.162594 | 5.338246  |
| C  | -0.093799 | 0.312560  | 3.538510  |
| C  | 0.703232  | -0.265580 | 4.542411  |
| C  | -0.256032 | 1.709927  | 3.516248  |
| C  | 1.316730  | 0.537675  | 5.508012  |
| H  | 0.852984  | -1.337106 | 4.578510  |
| C  | 0.350960  | 2.507903  | 4.489153  |
| H  | -0.848278 | 2.180947  | 2.744542  |
| C  | 1.137778  | 1.922688  | 5.483723  |
| H  | 1.930603  | 0.085543  | 6.276201  |
| H  | 0.217446  | 3.581715  | 4.467254  |
| H  | 1.612641  | 2.543064  | 6.232668  |
| N  | -2.488143 | -0.601285 | 0.962344  |
| N  | -0.375818 | -0.138853 | 1.123460  |
| H  | 1.338493  | -2.117236 | 0.650300  |
| H  | 0.847646  | 2.142170  | 0.559555  |
| C  | 3.978780  | -2.184937 | 0.020912  |
| C  | 4.246539  | -3.001008 | 1.161237  |
| C  | 4.539440  | -2.532006 | -1.246740 |
| C  | 5.016261  | -4.166895 | 0.997574  |
| C  | 5.336842  | -3.687972 | -1.341597 |
| C  | 5.555832  | -4.501166 | -0.237358 |
| H  | 5.219851  | -4.818124 | 1.837261  |
| H  | 5.787277  | -3.974866 | -2.282381 |
| H  | 6.158814  | -5.394564 | -0.337547 |
| C  | 3.357354  | 2.760786  | -0.220338 |
| C  | 3.271944  | 3.261403  | -1.550021 |
| C  | 3.945894  | 3.552218  | 0.804315  |
| C  | 3.779838  | 4.543668  | -1.826104 |
| C  | 4.455189  | 4.821452  | 0.472805  |
| C  | 4.367468  | 5.310084  | -0.825995 |
| H  | 3.721014  | 4.958550  | -2.823658 |
| H  | 4.917145  | 5.446177  | 1.225726  |
| H  | 4.755104  | 6.293512  | -1.058882 |
| C  | 4.029811  | 3.074572  | 2.253229  |
| H  | 3.553823  | 2.080140  | 2.376142  |
| C  | 3.274481  | 4.023517  | 3.192046  |
| H  | 2.225975  | 4.143259  | 2.845198  |
| H  | 3.257581  | 3.605334  | 4.220655  |
| H  | 3.754919  | 5.023345  | 3.232181  |
| C  | 5.488629  | 2.908193  | 2.693285  |
| H  | 6.014688  | 2.213461  | 2.003845  |
| H  | 6.021567  | 3.882365  | 2.698771  |
| H  | 5.530187  | 2.477882  | 3.716778  |
| C  | 2.642763  | 2.452979  | -2.685906 |
| H  | 2.341237  | 1.443302  | -2.341529 |
| C  | 3.641972  | 2.225273  | -3.826606 |
| H  | 3.227746  | 1.494473  | -4.553962 |
| H  | 3.862862  | 3.170125  | -4.366112 |
| H  | 4.590662  | 1.814783  | -3.421558 |
| C  | 1.364631  | 3.126197  | -3.197353 |
| H  | 0.891041  | 2.499317  | -3.982826 |
| H  | 0.640927  | 3.238883  | -2.362988 |

|    |           |           |           |
|----|-----------|-----------|-----------|
| H  | 1.579360  | 4.127431  | -3.626590 |
| C  | 4.314305  | -1.697642 | -2.511237 |
| H  | 3.609297  | -0.865234 | -2.324972 |
| C  | 3.758729  | -2.639433 | 2.567004  |
| H  | 3.232671  | -1.664932 | 2.574941  |
| C  | 2.760880  | -3.680810 | 3.089552  |
| H  | 1.905189  | -3.777446 | 2.388414  |
| H  | 3.241279  | -4.674921 | 3.206396  |
| H  | 2.363187  | -3.364929 | 4.077331  |
| C  | 4.933446  | -2.467047 | 3.539151  |
| H  | 5.459320  | -3.428333 | 3.717072  |
| H  | 5.657578  | -1.729091 | 3.132047  |
| H  | 4.564350  | -2.086308 | 4.515716  |
| C  | 3.673300  | -2.522678 | -3.633557 |
| H  | 4.348078  | -3.328990 | -3.988617 |
| H  | 2.729787  | -2.973727 | -3.274000 |
| H  | 3.430175  | -1.865993 | -4.496313 |
| C  | 5.629091  | -1.068002 | -2.988205 |
| H  | 6.059359  | -0.429979 | -2.187610 |
| H  | 6.371412  | -1.846736 | -3.262826 |
| H  | 5.447344  | -0.432508 | -3.880445 |
| C  | -1.520696 | -1.831449 | -3.097129 |
| C  | -0.742031 | -0.720344 | -3.596525 |
| H  | -1.170399 | -0.089669 | -4.381877 |
| B  | -0.955758 | -3.086215 | -2.472526 |
| O  | -1.740185 | -4.171823 | -2.084286 |
| O  | 0.395329  | -3.339397 | -2.243254 |
| C  | -0.881639 | -5.085422 | -1.372402 |
| C  | 0.518771  | -4.750493 | -1.974527 |
| C  | -0.968737 | -4.738812 | 0.104271  |
| H  | -2.010396 | -4.844342 | 0.436675  |
| H  | -0.350427 | -5.400638 | 0.726589  |
| H  | -0.651441 | -3.700034 | 0.281267  |
| C  | -1.351852 | -6.503278 | -1.614628 |
| H  | -0.654639 | -7.229717 | -1.171841 |
| H  | -2.336062 | -6.662467 | -1.152986 |
| H  | -1.445819 | -6.724042 | -2.684808 |
| C  | 0.749321  | -5.461280 | -3.300675 |
| H  | 0.909120  | -6.539734 | -3.162461 |
| H  | -0.103331 | -5.325381 | -3.980968 |
| H  | 1.640756  | -5.053613 | -3.794464 |
| C  | 1.681932  | -4.997865 | -1.038966 |
| H  | 1.642845  | -4.358673 | -0.150200 |
| H  | 1.697809  | -6.045855 | -0.705934 |
| H  | 2.633338  | -4.803911 | -1.549925 |
| Na | -2.208023 | 2.678661  | -1.054011 |
| H  | 0.329676  | -0.888077 | -3.762185 |
| H  | -2.605604 | -1.790943 | -3.260854 |
| H  | -0.482597 | 0.601026  | -2.680961 |
| O  | -1.352433 | 4.754096  | -0.605340 |
| O  | -3.297777 | 2.175756  | -3.001506 |
| C  | -0.892628 | 5.748107  | -1.459255 |
| H  | -0.785745 | 5.332733  | -2.483903 |
| H  | -1.635798 | 6.575037  | -1.493350 |
| C  | -0.770980 | 4.993943  | 0.630815  |
| H  | -1.415919 | 5.686930  | 1.215953  |
| H  | -0.673789 | 4.042426  | 1.192210  |
| C  | 0.589763  | 5.609231  | 0.396786  |
| H  | 1.361056  | 4.811698  | 0.356289  |
| H  | 0.847680  | 6.344571  | 1.189503  |
| C  | 0.445442  | 6.259443  | -0.950284 |
| H  | 0.431044  | 7.367403  | -0.856277 |
| H  | 1.272074  | 5.955272  | -1.627589 |
| C  | -2.878774 | 2.621795  | -4.249679 |
| H  | -1.823731 | 2.310717  | -4.407426 |
| H  | -2.923612 | 3.731168  | -4.283756 |
| C  | -4.212304 | 1.145000  | -3.187349 |
| H  | -3.891446 | 0.257066  | -2.605152 |
| H  | -5.204290 | 1.475725  | -2.811079 |
| C  | -3.762423 | 2.024397  | -5.322954 |
| H  | -3.187826 | 1.775202  | -6.241509 |
| H  | -4.589696 | 2.726333  | -5.569735 |
| C  | -4.308783 | 0.802550  | -4.659429 |
| H  | -5.356909 | 0.598225  | -4.968785 |
| H  | -3.669611 | -0.077167 | -4.892084 |

165

Figure\_S5\_imid-3\_modeR2\_prod(CuHadd) / electronic energy: -3525.672878743977 a.u. / lowest freq: 15.36 cm-1

|   |           |           |           |
|---|-----------|-----------|-----------|
| C | -2.424447 | -0.326660 | 2.267369  |
| H | -3.000389 | 0.602048  | 2.392571  |
| C | -0.906562 | -0.124203 | 2.458076  |
| H | -0.413732 | -1.032856 | 2.851409  |
| C | -1.338191 | -0.444123 | 0.176990  |
| C | -3.626870 | -1.166767 | 0.134873  |
| C | -3.525809 | -2.390092 | -0.538862 |
| C | -4.813821 | -0.424117 | 0.037586  |
| C | -4.599779 | -2.899979 | -1.260003 |
| H | -2.578289 | -2.930199 | -0.500322 |
| C | -5.897594 | -0.957538 | -0.667653 |

|    |           |           |           |
|----|-----------|-----------|-----------|
| C  | -5.800833 | -2.192031 | -1.304128 |
| H  | -4.491812 | -3.852816 | -1.783573 |
| H  | -6.808426 | -0.360953 | -0.743880 |
| H  | -6.656500 | -2.587577 | -1.855677 |
| C  | 0.881687  | 0.249845  | 0.716830  |
| C  | 1.351754  | 1.535343  | 0.446074  |
| C  | 1.764735  | -0.836220 | 0.674847  |
| C  | 2.700921  | 1.746750  | 0.154960  |
| C  | 3.136475  | -0.625197 | 0.450170  |
| C  | 3.601121  | 0.676402  | 0.204006  |
| H  | 4.655196  | 0.856090  | 0.037870  |
| S  | -4.969695 | 1.262393  | 0.649886  |
| O  | -5.983196 | 1.884798  | -0.253971 |
| O  | -3.630670 | 1.885579  | 0.428264  |
| O  | -5.375217 | 1.177371  | 2.062830  |
| Cu | -0.939696 | -1.052429 | -1.598593 |
| C  | -2.993549 | -1.401389 | 3.157893  |
| C  | -3.958436 | -1.079977 | 4.128427  |
| C  | -2.570378 | -2.737239 | 3.033582  |
| C  | -4.494985 | -2.076926 | 4.949051  |
| H  | -4.292161 | -0.058458 | 4.256271  |
| C  | -3.109485 | -3.730970 | 3.854596  |
| H  | -1.823300 | -3.006534 | 2.301555  |
| C  | -4.072473 | -3.401436 | 4.811080  |
| H  | -5.237886 | -1.821921 | 5.693681  |
| H  | -2.779485 | -4.756424 | 3.749474  |
| H  | -4.489098 | -4.171609 | 5.447190  |
| C  | -0.555939 | 1.050787  | 3.333532  |
| C  | 0.221082  | 0.862769  | 4.490493  |
| C  | -0.973870 | 2.350605  | 2.996414  |
| C  | 0.557107  | 1.951854  | 5.300188  |
| H  | 0.569121  | -0.124954 | 4.766839  |
| C  | -0.639963 | 3.435513  | 3.810409  |
| H  | -1.555725 | 2.522453  | 2.103122  |
| C  | 0.121865  | 3.235952  | 4.963849  |
| H  | 1.155513  | 1.799963  | 6.189100  |
| H  | -0.966420 | 4.432168  | 3.542914  |
| H  | 0.383562  | 4.077859  | 5.591521  |
| N  | -2.479197 | -0.713515 | 0.835220  |
| N  | -0.471918 | 0.067850  | 1.065287  |
| H  | 1.393797  | -1.831738 | 0.875443  |
| H  | 0.670058  | 2.371254  | 0.467812  |
| C  | 4.092307  | -1.755716 | 0.556558  |
| C  | 4.262537  | -2.420172 | 1.809746  |
| C  | 4.854909  | -2.177941 | -0.576881 |
| C  | 5.121818  | -3.531471 | 1.879587  |
| C  | 5.742936  | -3.260230 | -0.431856 |
| C  | 5.854840  | -3.940178 | 0.773685  |
| H  | 5.250350  | -4.074258 | 2.806659  |
| H  | 6.350335  | -3.594040 | -1.262324 |
| H  | 6.528610  | -4.783422 | 0.855884  |
| C  | 3.157030  | 3.089288  | -0.247603 |
| C  | 3.106604  | 3.466639  | -1.619508 |
| C  | 3.613635  | 4.013393  | 0.731617  |
| C  | 3.516227  | 4.762795  | -1.981333 |
| C  | 4.027097  | 5.292471  | 0.316130  |
| C  | 3.973051  | 5.661241  | -1.023557 |
| H  | 3.486811  | 5.083905  | -3.014174 |
| H  | 4.389712  | 6.016701  | 1.033550  |
| H  | 4.288395  | 6.652708  | -1.322349 |
| C  | 3.664665  | 3.662974  | 2.217970  |
| H  | 3.268518  | 2.643603  | 2.403558  |
| C  | 2.787005  | 4.613533  | 3.041118  |
| H  | 1.754579  | 4.624731  | 2.631570  |
| H  | 2.742830  | 4.269414  | 4.096190  |
| H  | 3.187799  | 5.648634  | 3.030007  |
| C  | 5.108731  | 3.661016  | 2.732028  |
| H  | 5.724230  | 2.960442  | 2.127796  |
| H  | 5.557820  | 4.675058  | 2.675785  |
| H  | 5.135409  | 3.321642  | 3.789639  |
| C  | 2.621941  | 2.510094  | -2.711554 |
| H  | 2.356601  | 1.519046  | -2.290983 |
| C  | 3.724229  | 2.244527  | -3.743346 |
| H  | 3.406979  | 1.437803  | -4.438643 |
| H  | 3.948119  | 3.154593  | -4.338626 |
| H  | 4.651399  | 1.914706  | -3.229086 |
| C  | 1.350256  | 3.037814  | -3.386342 |
| H  | 0.999715  | 2.319457  | -4.157187 |
| H  | 0.544398  | 3.151307  | -2.632144 |
| H  | 1.526494  | 4.018113  | -3.876368 |
| C  | 4.762512  | -1.492449 | -1.942695 |
| H  | 3.939713  | -0.751353 | -1.960270 |
| C  | 3.585521  | -1.940628 | 3.097825  |
| H  | 3.016303  | -1.005472 | 2.932506  |
| C  | 2.583626  | -2.979430 | 3.617431  |
| H  | 1.828805  | -3.209499 | 2.836756  |
| H  | 3.095713  | -3.920794 | 3.908032  |
| H  | 2.047733  | -2.579814 | 4.504863  |

|    |           |           |           |
|----|-----------|-----------|-----------|
| C  | 4.619624  | -1.587636 | 4.175682  |
| H  | 5.164204  | -2.488132 | 4.528853  |
| H  | 5.353152  | -0.856588 | 3.772910  |
| H  | 4.113245  | -1.123292 | 5.049067  |
| C  | 4.444580  | -2.488494 | -3.066725 |
| H  | 5.303177  | -3.160241 | -3.275226 |
| H  | 3.570856  | -3.107110 | -2.792653 |
| H  | 4.201001  | -1.939233 | -4.001428 |
| C  | 6.059953  | -0.736702 | -2.257613 |
| H  | 6.276263  | 0.009029  | -1.465012 |
| H  | 6.920855  | -1.434698 | -2.330209 |
| H  | 5.963313  | -0.198690 | -3.224364 |
| C  | -0.309216 | -1.922779 | -3.248000 |
| C  | 0.872264  | -1.218031 | -3.894915 |
| H  | 1.263624  | -1.741369 | -4.789244 |
| B  | -0.002351 | -3.173978 | -2.443464 |
| O  | -0.911318 | -4.190433 | -2.102854 |
| O  | 1.254884  | -3.460195 | -1.902205 |
| C  | -0.267245 | -5.054378 | -1.147357 |
| C  | 1.246568  | -4.822714 | -1.460252 |
| C  | -0.635342 | -4.577091 | 0.248819  |
| H  | -1.722319 | -4.648610 | 0.391965  |
| H  | -0.162122 | -5.182384 | 1.034681  |
| H  | -0.335735 | -3.527146 | 0.392989  |
| C  | -0.748925 | -6.473981 | -1.359883 |
| H  | -0.201563 | -7.177772 | -0.715451 |
| H  | -1.816364 | -6.555343 | -1.111059 |
| H  | -0.625570 | -6.792850 | -2.401828 |
| C  | 1.731256  | -5.695630 | -2.611191 |
| H  | 1.796865  | -6.754656 | -2.323920 |
| H  | 1.062767  | -5.617456 | -3.480287 |
| H  | 2.731836  | -5.373127 | -2.927585 |
| C  | 2.174760  | -4.968070 | -0.272692 |
| H  | 1.958175  | -4.230727 | 0.508594  |
| H  | 2.102872  | -5.972323 | 0.170016  |
| H  | 3.215426  | -4.819468 | -0.589640 |
| Na | -4.228800 | 2.996647  | -1.579536 |
| H  | 1.721048  | -1.147287 | -3.197937 |
| H  | -1.183716 | -2.032471 | -3.912138 |
| H  | 0.666099  | -0.185194 | -4.218749 |
| O  | -2.407688 | 4.472118  | -1.466044 |
| O  | -3.190522 | 1.275411  | -2.808663 |
| C  | -1.628882 | 4.165894  | -0.355130 |
| H  | -2.245186 | 4.305294  | 0.558430  |
| H  | -1.314874 | 3.103660  | -0.416512 |
| C  | -1.782941 | 5.498944  | -2.162109 |
| H  | -1.274794 | 5.074998  | -3.055568 |
| H  | -2.541155 | 6.235026  | -2.503823 |
| C  | -0.768752 | 6.167023  | -1.260564 |
| H  | -1.240656 | 7.018071  | -0.721332 |
| H  | 0.120578  | 6.519777  | -1.827266 |
| C  | -0.419330 | 5.080515  | -0.296682 |
| H  | 0.490018  | 4.544839  | -0.642274 |
| H  | -0.249378 | 5.477071  | 0.728216  |
| C  | -2.043727 | 1.565716  | -3.534164 |
| H  | -1.171701 | 1.062647  | -3.062677 |
| H  | -1.865460 | 2.660449  | -3.522489 |
| C  | -3.725978 | 0.127673  | -3.375953 |
| H  | -3.289241 | -0.766185 | -2.881150 |
| H  | -4.826178 | 0.115963  | -3.227497 |
| C  | -2.239142 | 1.082403  | -4.958797 |
| H  | -1.325425 | 0.580973  | -5.342649 |
| H  | -2.503241 | 1.933155  | -5.625012 |
| C  | -3.390890 | 0.121262  | -4.853772 |
| H  | -4.256662 | 0.486863  | -5.448870 |
| H  | -3.106189 | -0.897781 | -5.195243 |

178

Figure\_S6\_imid-3\_modeS1\_ed(CuHadd) / electronic energy: -3602.006293842289 a.u. / lowest freq: 11.51 cm<sup>-1</sup>

|   |           |           |           |
|---|-----------|-----------|-----------|
| C | 0.109200  | 3.175353  | 0.027174  |
| H | 0.847763  | 2.955608  | 0.813148  |
| C | -1.310449 | 2.690164  | 0.377864  |
| H | -2.083297 | 3.390229  | 0.016144  |
| C | -0.417262 | 1.287269  | -1.297191 |
| C | 1.520312  | 2.494814  | -2.035170 |
| C | 1.214490  | 2.624696  | -3.396608 |
| C | 2.864951  | 2.471545  | -1.635250 |
| C | 2.220120  | 2.737232  | -4.350750 |
| H | 0.162003  | 2.621996  | -3.692118 |
| C | 3.868678  | 2.606796  | -2.598713 |
| C | 3.554627  | 2.741637  | -3.948517 |
| H | 1.957912  | 2.827162  | -5.407162 |
| H | 4.907722  | 2.567348  | -2.267708 |
| H | 4.354296  | 2.838780  | -4.685934 |
| C | -2.511854 | 0.561247  | -0.340318 |
| C | -3.817947 | 1.074342  | -0.259142 |
| C | -2.315692 | -0.825910 | -0.272717 |
| C | -4.910489 | 0.210540  | -0.115361 |
| C | -3.408390 | -1.686909 | -0.103283 |



|    |           |           |           |
|----|-----------|-----------|-----------|
| C  | -4.705049 | -1.169453 | -0.037792 |
| H  | -5.548292 | -1.836335 | 0.101756  |
| S  | 3.374564  | 2.150258  | 0.057911  |
| O  | 4.788159  | 1.693467  | -0.065868 |
| O  | 2.501196  | 1.039012  | 0.539330  |
| O  | 3.212824  | 3.417294  | 0.794712  |
| Cu | -0.143056 | 0.046881  | -2.824697 |
| C  | 0.148687  | 4.644581  | -0.310659 |
| C  | 0.803956  | 5.549320  | 0.542671  |
| C  | -0.488443 | 5.135172  | -1.466426 |
| C  | 0.840229  | 6.912463  | 0.234327  |
| H  | 1.278628  | 5.203698  | 1.451985  |
| C  | -0.448543 | 6.498620  | -1.771024 |
| H  | -1.014253 | 4.461578  | -2.131417 |
| C  | 0.217425  | 7.386335  | -0.922811 |
| H  | 1.348538  | 7.602509  | 0.895304  |
| H  | -0.936131 | 6.867304  | -2.664167 |
| H  | 0.246356  | 8.442091  | -1.159317 |
| C  | -1.501364 | 2.454758  | 1.854276  |
| C  | -2.369079 | 3.274101  | 2.596527  |
| C  | -0.839568 | 1.396036  | 2.502036  |
| C  | -2.565891 | 3.039720  | 3.960733  |
| H  | -2.893892 | 4.093512  | 2.121424  |
| C  | -1.046847 | 1.159226  | 3.863400  |
| H  | -0.179142 | 0.746015  | 1.945536  |
| C  | -1.909546 | 1.980516  | 4.592509  |
| H  | -3.234633 | 3.675134  | 4.526764  |
| H  | -0.541325 | 0.337460  | 4.352742  |
| H  | -2.070174 | 1.795893  | 5.646708  |
| N  | 0.429565  | 2.325484  | -1.146157 |
| N  | -1.396084 | 1.433183  | -0.392839 |
| H  | -1.310912 | -1.229362 | -0.301674 |
| H  | -3.991907 | 2.141384  | -0.303664 |
| C  | -3.185382 | -3.130338 | 0.084382  |
| C  | -3.101085 | -3.988734 | -1.045112 |
| C  | -2.988643 | -3.647741 | 1.395230  |
| C  | -2.762538 | -5.339356 | -0.845239 |
| C  | -2.651839 | -5.005777 | 1.542766  |
| C  | -2.535206 | -5.837290 | 0.433684  |
| H  | -2.664508 | -6.014858 | -1.684681 |
| H  | -2.468316 | -5.426831 | 2.522313  |
| H  | -2.268589 | -6.877894 | 0.566573  |
| C  | -6.276179 | 0.752790  | -0.000352 |
| C  | -6.838729 | 1.003843  | 1.281676  |
| C  | -7.053275 | 0.982123  | -1.166616 |
| C  | -8.168800 | 1.465896  | 1.359731  |
| C  | -8.369325 | 1.452818  | -1.009543 |
| C  | -8.898920 | 1.682770  | 0.259198  |
| H  | -8.626900 | 1.651880  | 2.322453  |
| H  | -8.997384 | 1.636438  | -1.871389 |
| H  | -9.917242 | 2.038624  | 0.353604  |
| C  | -6.513694 | 0.719159  | -2.571842 |
| H  | -5.462076 | 0.368578  | -2.537155 |
| C  | -6.504577 | 2.002637  | -3.411117 |
| H  | -5.931412 | 2.795557  | -2.884397 |
| H  | -6.014038 | 1.812975  | -4.389769 |
| H  | -7.535231 | 2.369043  | -3.601387 |
| C  | -7.309156 | -0.391655 | -3.267660 |
| H  | -7.296319 | -1.312541 | -2.645758 |
| H  | -8.363080 | -0.086513 | -3.438400 |
| H  | -6.848381 | -0.631574 | -4.249763 |
| C  | -6.052602 | 0.772263  | 2.572858  |
| H  | -5.008902 | 0.464782  | 2.357601  |
| C  | -6.673005 | -0.363112 | 3.394367  |
| H  | -6.045620 | -0.574067 | 4.286593  |
| H  | -7.696055 | -0.099420 | 3.736297  |
| H  | -6.725061 | -1.288364 | 2.781335  |
| C  | -5.945355 | 2.058438  | 3.401294  |
| H  | -5.287286 | 1.888243  | 4.279838  |
| H  | -5.502094 | 2.870082  | 2.785571  |
| H  | -6.938339 | 2.388133  | 3.771676  |
| C  | -3.110321 | -2.769400 | 2.642439  |
| H  | -3.455426 | -1.748272 | 2.383286  |
| C  | -3.356120 | -3.484788 | -2.465519 |
| H  | -3.689312 | -2.426832 | -2.459918 |
| C  | -2.071123 | -3.524990 | -3.296439 |
| H  | -1.298960 | -2.897153 | -2.807024 |
| H  | -1.686241 | -4.561837 | -3.396336 |
| H  | -2.257213 | -3.114058 | -4.311626 |
| C  | -4.483870 | -4.270312 | -3.147053 |
| H  | -4.191103 | -5.325357 | -3.329936 |
| H  | -5.395793 | -4.252331 | -2.512479 |
| H  | -4.733812 | -3.803894 | -4.124046 |
| C  | -1.751320 | -2.595726 | 3.326360  |
| H  | -1.332467 | -3.573121 | 3.645973  |
| H  | -1.041986 | -2.106826 | 2.625874  |
| H  | -1.852708 | -1.944311 | 4.220362  |
| C  | -4.156120 | -3.322881 | 3.618628  |

|    |           |           |           |
|----|-----------|-----------|-----------|
| H  | -5.125153 | -3.467370 | 3.094702  |
| H  | -3.832561 | -4.291087 | 4.054499  |
| H  | -4.316579 | -2.603633 | 4.450052  |
| C  | 1.752401  | -0.793429 | -2.843819 |
| C  | 1.015695  | -1.042300 | -4.021254 |
| H  | 0.559511  | -2.023460 | -4.188309 |
| B  | 1.912688  | -1.892229 | -1.786406 |
| O  | 1.076050  | -2.983444 | -1.724223 |
| O  | 2.971420  | -2.007093 | -0.890330 |
| C  | 1.511869  | -3.807744 | -0.621669 |
| C  | 3.012221  | -3.411246 | -0.510784 |
| C  | 0.709343  | -3.392978 | 0.597365  |
| H  | -0.356466 | -3.499720 | 0.370758  |
| H  | 0.932918  | -4.015563 | 1.474384  |
| H  | 0.892081  | -2.339886 | 0.852228  |
| C  | 1.262873  | -5.258385 | -0.966421 |
| H  | 1.661742  | -5.923429 | -0.186951 |
| H  | 0.184806  | -5.447040 | -1.047992 |
| H  | 1.722376  | -5.531915 | -1.923678 |
| C  | 3.876415  | -4.130383 | -1.532828 |
| H  | 4.008924  | -5.190977 | -1.279494 |
| H  | 3.445379  | -4.068873 | -2.541906 |
| H  | 4.863780  | -3.657334 | -1.556265 |
| C  | 3.603359  | -3.543602 | 0.871456  |
| H  | 3.081219  | -2.915255 | 1.599665  |
| H  | 3.554954  | -4.585203 | 1.219803  |
| H  | 4.664588  | -3.253827 | 0.865697  |
| Na | 4.405932  | -0.492982 | 0.803120  |
| H  | 1.191453  | -0.460315 | -4.932720 |
| H  | 2.462067  | 0.043670  | -2.849369 |
| H  | -1.421057 | 0.141734  | -3.766554 |
| O  | 6.269042  | 0.175130  | 2.302973  |
| O  | 3.550933  | -0.936461 | 3.011079  |
| C  | 5.828798  | 1.260193  | 3.058281  |
| H  | 4.768339  | 1.483782  | 2.817709  |
| H  | 5.895403  | 0.995801  | 4.135457  |
| C  | 7.440980  | 0.552446  | 1.655019  |
| H  | 8.206610  | -0.243205 | 1.774283  |
| H  | 7.232411  | 0.682114  | 0.572501  |
| C  | 7.943333  | 1.856676  | 2.232959  |
| H  | 8.663528  | 1.656526  | 3.057244  |
| H  | 8.417389  | 2.499250  | 1.459405  |
| C  | 6.697001  | 2.468965  | 2.778919  |
| H  | 6.219119  | 3.114602  | 2.009223  |
| H  | 6.895306  | 3.060248  | 3.699293  |
| C  | 2.225221  | -0.753618 | 3.375419  |
| H  | 2.126315  | 0.200493  | 3.938847  |
| H  | 1.599414  | -0.692569 | 2.463612  |
| C  | 4.139353  | -1.687268 | 4.019248  |
| H  | 4.961834  | -2.301289 | 3.594780  |
| H  | 4.566623  | -1.004916 | 4.786627  |
| C  | 3.081280  | -2.574992 | 4.642089  |
| H  | 3.147186  | -3.605211 | 4.227042  |
| H  | 3.188133  | -2.609558 | 5.748293  |
| C  | 1.788575  | -1.926680 | 4.232792  |
| H  | 1.176099  | -2.637918 | 3.638941  |
| H  | 1.208477  | -1.580432 | 5.115878  |
| O  | 6.066163  | -1.359570 | -0.740085 |
| C  | 7.214028  | -2.127351 | -0.886436 |
| H  | 8.083130  | -1.575434 | -0.466554 |
| H  | 7.096862  | -3.076589 | -0.321788 |
| C  | 5.896623  | -0.671128 | -1.934169 |
| H  | 6.447946  | 0.294138  | -1.885919 |
| H  | 4.821490  | -0.453254 | -2.097070 |
| C  | 7.435955  | -2.412978 | -2.363233 |
| H  | 8.475451  | -2.152362 | -2.660602 |
| H  | 7.239828  | -3.482620 | -2.596690 |
| C  | 6.440051  | -1.525849 | -3.056590 |
| H  | 6.918196  | -0.903419 | -3.844007 |
| H  | 5.623039  | -2.135194 | -3.502581 |

178

Figure\_S6\_imid-3\_modeS1\_ts(CuHadd)\_01 / electronic energy: -3601.990199443651 a.u. / lowest freq: -771.28 cm<sup>-1</sup>

|   |           |          |           |
|---|-----------|----------|-----------|
| C | 0.056556  | 3.243639 | -0.074260 |
| H | 0.843577  | 2.989099 | 0.653326  |
| C | -1.326000 | 2.710630 | 0.337505  |
| H | -2.134993 | 3.375356 | -0.013420 |
| C | -0.460256 | 1.348313 | -1.379081 |
| C | 1.342101  | 2.669848 | -2.247809 |
| C | 0.953466  | 2.890921 | -3.576445 |
| C | 2.705437  | 2.609390 | -1.933268 |
| C | 1.900969  | 3.073956 | -4.577968 |
| H | -0.114711 | 2.914127 | -3.803970 |
| C | 3.651620  | 2.816481 | -2.941682 |
| C | 3.257655  | 3.051820 | -4.254991 |
| H | 1.578193  | 3.242470 | -5.607674 |
| H | 4.709017  | 2.750936 | -2.680381 |
| H | 4.012462  | 3.203725 | -5.029633 |
| C | -2.474235 | 0.530736 | -0.321066 |

|    |           |           |           |
|----|-----------|-----------|-----------|
| C  | -3.789761 | 1.006409  | -0.174636 |
| C  | -2.242918 | -0.853232 | -0.313707 |
| C  | -4.854876 | 0.110637  | -0.024242 |
| C  | -3.309430 | -1.747229 | -0.141784 |
| C  | -4.614191 | -1.265006 | -0.008903 |
| H  | -5.436247 | -1.957490 | 0.132841  |
| S  | 3.330906  | 2.207971  | -0.298112 |
| O  | 4.664602  | 1.602747  | -0.573487 |
| O  | 2.407516  | 1.194031  | 0.294878  |
| O  | 3.365524  | 3.488110  | 0.434408  |
| Cu | 0.110060  | 0.107483  | -2.720813 |
| C  | 0.060129  | 4.727521  | -0.337851 |
| C  | 0.795182  | 5.589773  | 0.493817  |
| C  | -0.674152 | 5.271872  | -1.408603 |
| C  | 0.806043  | 6.966560  | 0.251235  |
| H  | 1.354963  | 5.199165  | 1.334040  |
| C  | -0.659536 | 6.648860  | -1.647646 |
| H  | -1.254138 | 4.629577  | -2.059494 |
| C  | 0.081142  | 7.495485  | -0.819464 |
| H  | 1.375517  | 7.624109  | 0.895238  |
| H  | -1.223154 | 7.059674  | -2.475264 |
| H  | 0.091097  | 8.561623  | -1.005589 |
| C  | -1.456835 | 2.501453  | 1.824378  |
| C  | -2.301819 | 3.330861  | 2.581514  |
| C  | -0.767484 | 1.456674  | 2.468467  |
| C  | -2.453976 | 3.118453  | 3.954757  |
| H  | -2.844509 | 4.140913  | 2.110385  |
| C  | -0.937824 | 1.236875  | 3.838182  |
| H  | -0.116582 | 0.801124  | 1.905329  |
| C  | -1.778734 | 2.068269  | 4.581115  |
| H  | -3.106274 | 3.761261  | 4.531544  |
| H  | -0.422575 | 0.419119  | 4.323914  |
| H  | -1.908714 | 1.897725  | 5.641897  |
| N  | 0.306592  | 2.459916  | -1.300548 |
| N  | -1.384089 | 1.433261  | -0.403708 |
| H  | -1.231010 | -1.230547 | -0.396682 |
| H  | -3.994755 | 2.068548  | -0.176713 |
| C  | -3.052082 | -3.192130 | -0.022028 |
| C  | -2.985999 | -4.002708 | -1.188108 |
| C  | -2.825992 | -3.762511 | 1.261960  |
| C  | -2.651120 | -5.362155 | -1.049625 |
| C  | -2.489784 | -5.125942 | 1.347120  |
| C  | -2.400244 | -5.912407 | 0.203180  |
| H  | -2.575059 | -6.003952 | -1.917353 |
| H  | -2.288002 | -5.586791 | 2.304969  |
| H  | -2.136074 | -6.958608 | 0.288430  |
| C  | -6.228954 | 0.612592  | 0.154905  |
| C  | -6.736393 | 0.853563  | 1.461528  |
| C  | -7.068640 | 0.809333  | -0.973247 |
| C  | -8.074281 | 1.276716  | 1.601829  |
| C  | -8.390114 | 1.238386  | -0.754637 |
| C  | -8.863746 | 1.462443  | 0.537121  |
| H  | -8.490351 | 1.455755  | 2.584755  |
| H  | -9.065318 | 1.394584  | -1.585678 |
| H  | -9.886835 | 1.787437  | 0.679226  |
| C  | -6.588889 | 0.555219  | -2.401680 |
| H  | -5.523120 | 0.248502  | -2.416754 |
| C  | -6.673199 | 1.829528  | -3.250841 |
| H  | -6.109486 | 2.650813  | -2.758508 |
| H  | -6.221890 | 1.650367  | -4.250146 |
| H  | -7.726024 | 2.151011  | -3.395222 |
| C  | -7.371949 | -0.593631 | -3.047780 |
| H  | -7.288652 | -1.507571 | -2.421061 |
| H  | -8.445103 | -0.333582 | -3.165298 |
| H  | -6.952663 | -0.823299 | -4.050708 |
| C  | -5.883809 | 0.648356  | 2.714334  |
| H  | -4.844784 | 0.363469  | 2.450628  |
| C  | -6.436366 | -0.496384 | 3.570660  |
| H  | -5.758427 | -0.690910 | 4.429085  |
| H  | -7.445232 | -0.252642 | 3.965446  |
| H  | -6.501494 | -1.424842 | 2.963834  |
| C  | -5.768518 | 1.941917  | 3.529886  |
| H  | -5.065956 | 1.793106  | 4.377285  |
| H  | -5.374696 | 2.759817  | 2.889371  |
| H  | -6.750691 | 2.250383  | 3.944765  |
| C  | -2.916523 | -2.935368 | 2.546293  |
| H  | -3.246455 | -1.898171 | 2.335850  |
| C  | -3.258943 | -3.440372 | -2.582980 |
| H  | -3.552193 | -2.371819 | -2.533433 |
| C  | -1.999386 | -3.497432 | -3.453126 |
| H  | -1.183533 | -2.929615 | -2.961208 |
| H  | -1.665239 | -4.543948 | -3.614540 |
| H  | -2.195805 | -3.030971 | -4.442014 |
| C  | -4.432051 | -4.163642 | -3.256034 |
| H  | -4.185995 | -5.225331 | -3.467619 |
| H  | -5.328169 | -4.123801 | -2.600176 |
| H  | -4.684673 | -3.665013 | -4.216268 |
| C  | -1.545714 | -2.812952 | 3.216811  |

|    |           |           |           |
|----|-----------|-----------|-----------|
| H  | -1.159562 | -3.806121 | 3.528793  |
| H  | -0.826718 | -2.349457 | 2.509598  |
| H  | -1.614102 | -2.160516 | 4.113494  |
| C  | -3.957570 | -3.513278 | 3.512955  |
| H  | -4.937063 | -3.614989 | 2.998562  |
| H  | -3.646619 | -4.507063 | 3.897566  |
| H  | -4.090932 | -2.830314 | 4.379086  |
| C  | 1.965565  | -0.793176 | -2.966249 |
| C  | 1.109691  | -0.911239 | -4.132549 |
| H  | 0.716522  | -1.907550 | -4.364139 |
| B  | 2.098068  | -1.931782 | -1.987922 |
| O  | 1.290991  | -3.062858 | -2.052808 |
| O  | 3.073969  | -2.081789 | -0.982963 |
| C  | 1.639610  | -3.914229 | -0.951715 |
| C  | 3.117421  | -3.503715 | -0.691978 |
| C  | 0.736036  | -3.551789 | 0.215676  |
| H  | -0.304702 | -3.627875 | -0.113886 |
| H  | 0.869045  | -4.221727 | 1.076335  |
| H  | 0.905632  | -2.516185 | 0.543396  |
| C  | 1.436575  | -5.357078 | -1.358017 |
| H  | 1.782905  | -6.044173 | -0.572092 |
| H  | 0.369069  | -5.554506 | -1.526259 |
| H  | 1.968237  | -5.596311 | -2.287402 |
| C  | 4.081762  | -4.147377 | -1.675543 |
| H  | 4.194106  | -5.224264 | -1.488367 |
| H  | 3.752548  | -4.010598 | -2.715194 |
| H  | 5.069479  | -3.683669 | -1.564660 |
| C  | 3.583199  | -3.739662 | 0.723210  |
| H  | 2.984091  | -3.177436 | 1.444144  |
| H  | 3.517972  | -4.808095 | 0.975084  |
| H  | 4.631103  | -3.433162 | 0.838792  |
| Na | 4.162355  | -0.420539 | 0.675342  |
| H  | 1.393281  | -0.365485 | -5.039884 |
| H  | 2.690777  | 0.029922  | -2.955359 |
| H  | -0.390946 | -0.226946 | -4.195106 |
| O  | 5.556073  | 0.770503  | 2.355410  |
| O  | 3.375123  | -1.140703 | 2.839228  |
| C  | 6.702267  | 1.411869  | 1.900734  |
| H  | 7.569914  | 1.066693  | 2.504689  |
| H  | 6.890402  | 1.148133  | 0.840021  |
| C  | 4.841003  | 1.673801  | 3.138684  |
| H  | 3.825117  | 1.798183  | 2.709462  |
| H  | 4.732827  | 1.271609  | 4.168025  |
| C  | 5.555541  | 3.011400  | 3.174875  |
| H  | 4.853389  | 3.861142  | 3.031095  |
| H  | 6.096722  | 3.129734  | 4.139884  |
| C  | 6.532749  | 2.905812  | 2.050414  |
| H  | 7.494954  | 3.409958  | 2.286786  |
| H  | 6.097032  | 3.336167  | 1.122708  |
| C  | 2.084789  | -1.147105 | 3.343784  |
| H  | 1.947670  | -0.264357 | 4.006703  |
| H  | 1.358345  | -1.080469 | 2.508627  |
| C  | 4.156665  | -1.850545 | 3.742014  |
| H  | 4.979780  | -2.360947 | 3.198326  |
| H  | 4.606677  | -1.147340 | 4.476125  |
| C  | 3.282306  | -2.864328 | 4.457394  |
| H  | 3.475937  | -3.890535 | 4.073924  |
| H  | 3.460633  | -2.836071 | 5.554649  |
| C  | 1.882593  | -2.430243 | 4.122692  |
| H  | 1.389768  | -3.195217 | 3.484176  |
| H  | 1.274270  | -2.254415 | 5.036568  |
| O  | 6.140170  | -1.419483 | -0.121595 |
| C  | 7.287349  | -2.024640 | 0.367231  |
| H  | 7.952670  | -1.251826 | 0.812561  |
| H  | 7.019602  | -2.756845 | 1.157884  |
| C  | 6.413136  | -1.050897 | -1.434153 |
| H  | 6.748098  | 0.008988  | -1.457209 |
| H  | 5.488879  | -1.138526 | -2.043683 |
| C  | 7.982759  | -2.717045 | -0.783980 |
| H  | 9.088408  | -2.668197 | -0.678172 |
| H  | 7.655513  | -3.778667 | -0.844161 |
| C  | 7.501721  | -1.955526 | -1.987380 |
| H  | 8.324220  | -1.352256 | -2.430682 |
| H  | 7.093603  | -2.648145 | -2.755947 |

178

Figure\_S6\_imid-3\_modeS1\_ts(CuHadd)\_02 / electronic energy: -3601.987872299208 a.u. / lowest freq: -745.47 cm<sup>-1</sup>

|   |           |          |           |
|---|-----------|----------|-----------|
| C | -0.174442 | 3.327335 | -0.039451 |
| H | 0.580902  | 3.133492 | 0.737988  |
| C | -1.547899 | 2.729858 | 0.308055  |
| H | -2.375510 | 3.349585 | -0.080695 |
| C | -0.539527 | 1.408276 | -1.363673 |
| C | 1.283284  | 2.779296 | -2.110826 |
| C | 0.983072  | 2.936816 | -3.470267 |
| C | 2.625796  | 2.793617 | -1.701078 |
| C | 1.991246  | 3.117547 | -4.411756 |
| H | -0.066462 | 2.906581 | -3.772526 |
| C | 3.631259  | 2.993773 | -2.650427 |
| C | 3.321725  | 3.158924 | -3.998017 |

|    |            |           |           |
|----|------------|-----------|-----------|
| H  | 1.734472   | 3.232599  | -5.467145 |
| H  | 4.668675   | 2.980552  | -2.311410 |
| H  | 4.122230   | 3.306621  | -4.726183 |
| C  | -2.532067  | 0.474646  | -0.362145 |
| C  | -3.881732  | 0.852438  | -0.256604 |
| C  | -2.193871  | -0.885697 | -0.296777 |
| C  | -4.876912  | -0.117521 | -0.087133 |
| C  | -3.190244  | -1.852401 | -0.103983 |
| C  | -4.530437  | -1.468604 | -0.009684 |
| H  | -5.298687  | -2.216993 | 0.148767  |
| S  | 3.121162   | 2.434260  | -0.011663 |
| O  | 4.549765   | 2.024666  | -0.115064 |
| O  | 2.264977   | 1.283334  | 0.399741  |
| O  | 2.903221   | 3.667803  | 0.767782  |
| Cu | 0.030037   | 0.193354  | -2.723067 |
| C  | -0.240870  | 4.804655  | -0.332455 |
| C  | 0.369722   | 5.726216  | 0.535843  |
| C  | -0.926725  | 5.284052  | -1.464758 |
| C  | 0.309823   | 7.096990  | 0.267663  |
| H  | 0.884126   | 5.387217  | 1.425748  |
| C  | -0.982834  | 6.655300  | -1.729260 |
| H  | -1.415318  | 4.595766  | -2.143075 |
| C  | -0.363450  | 7.561039  | -0.864936 |
| H  | 0.783339   | 7.800270  | 0.940430  |
| H  | -1.508059  | 7.015854  | -2.604196 |
| H  | -0.408675  | 8.622684  | -1.070504 |
| C  | -1.734054  | 2.523162  | 1.792049  |
| C  | -2.592434  | 3.379050  | 2.510484  |
| C  | -1.090169  | 1.520346  | 2.441648  |
| C  | -2.770388  | 3.189674  | 3.882667  |
| H  | -3.115178  | 4.186456  | 2.013037  |
| C  | -1.254072  | 1.316585  | 3.762951  |
| H  | -0.433922  | 0.854493  | 1.894791  |
| C  | -2.096376  | 2.143884  | 4.514515  |
| H  | -3.426822  | 3.839828  | 4.446192  |
| H  | -0.729626  | 0.506109  | 4.250808  |
| H  | -2.223805  | 1.974189  | 5.575698  |
| N  | 0.190180   | 2.541330  | -1.237369 |
| N  | -1.512872  | 1.455604  | -0.437802 |
| H  | -1.153819  | -1.185803 | -0.343706 |
| H  | -4.164310  | 1.896113  | -0.299834 |
| C  | -2.823436  | -3.266312 | 0.079973  |
| C  | -2.749797  | -4.134366 | -1.043371 |
| C  | -2.513212  | -3.749590 | 1.382037  |
| C  | -2.327112  | -5.461682 | -0.846690 |
| C  | -2.090707  | -5.083897 | 1.525547  |
| C  | -1.995756  | -5.925723 | 0.422192  |
| H  | -2.246483  | -6.145531 | -1.681279 |
| H  | -1.827494  | -5.479007 | 2.497751  |
| H  | -1.665571  | -6.948322 | 0.552033  |
| C  | -6.288558  | 0.281642  | 0.052841  |
| C  | -6.829204  | 0.527672  | 1.345690  |
| C  | -7.119183  | 0.365977  | -1.098734 |
| C  | -8.195202  | 0.844912  | 1.459438  |
| C  | -8.477433  | 0.692595  | -0.932322 |
| C  | -9.005882  | 0.928575  | 0.332365  |
| H  | -8.642757  | 1.023798  | 2.428129  |
| H  | -9.138962  | 0.758186  | -1.786082 |
| H  | -10.054772 | 1.173409  | 0.440507  |
| C  | -6.586439  | 0.095227  | -2.506271 |
| H  | -5.498526  | -0.119120 | -2.489079 |
| C  | -6.757998  | 1.321160  | -3.411952 |
| H  | -6.280368  | 2.208223  | -2.943297 |
| H  | -6.266625  | 1.140761  | -4.391971 |
| H  | -7.830239  | 1.543433  | -3.594713 |
| C  | -7.253030  | -1.142826 | -3.117501 |
| H  | -7.106235  | -2.019489 | -2.450460 |
| H  | -8.341452  | -0.981818 | -3.267327 |
| H  | -6.792263  | -1.376675 | -4.101102 |
| C  | -5.978672  | 0.434933  | 2.613919  |
| H  | -4.915913  | 0.229263  | 2.371992  |
| C  | -6.445632  | -0.723733 | 3.501968  |
| H  | -5.764770  | -0.834129 | 4.372990  |
| H  | -7.476193  | -0.551856 | 3.878170  |
| H  | -6.426022  | -1.673395 | 2.925444  |
| C  | -5.980963  | 1.759187  | 3.387378  |
| H  | -5.283720  | 1.694516  | 4.249568  |
| H  | -5.642074  | 2.584920  | 2.725782  |
| H  | -6.991493  | 2.001129  | 3.777470  |
| C  | -2.614947  | -2.862129 | 2.624585  |
| H  | -3.014149  | -1.858866 | 2.372092  |
| C  | -3.111434  | -3.668383 | -2.453757 |
| H  | -3.453313  | -2.613298 | -2.452258 |
| C  | -1.891222  | -3.717481 | -3.378532 |
| H  | -1.081071  | -3.089914 | -2.954832 |
| H  | -1.517586  | -4.755581 | -3.503030 |
| H  | -2.153087  | -3.312515 | -4.379336 |
| C  | -4.276098  | -4.484458 | -3.027629 |

|    |           |           |           |
|----|-----------|-----------|-----------|
| H  | -3.988555 | -5.545284 | -3.184371 |
| H  | -5.144347 | -4.443591 | -2.335360 |
| H  | -4.592975 | -4.059141 | -4.003966 |
| C  | -1.235232 | -2.623629 | 3.246344  |
| H  | -0.761716 | -3.577574 | 3.559994  |
| H  | -0.576124 | -2.115095 | 2.511565  |
| H  | -1.327486 | -1.966711 | 4.136852  |
| C  | -3.591690 | -3.449271 | 3.651071  |
| H  | -4.576132 | -3.639189 | 3.172272  |
| H  | -3.208133 | -4.399410 | 4.078191  |
| H  | -3.745690 | -2.729216 | 4.483154  |
| C  | 1.875187  | -0.679865 | -3.059564 |
| C  | 0.961528  | -0.826763 | -4.176517 |
| H  | 0.570541  | -1.830779 | -4.376689 |
| B  | 2.104530  | -1.779164 | -2.056146 |
| O  | 1.373782  | -2.960685 | -2.006516 |
| O  | 3.151429  | -1.819231 | -1.116866 |
| C  | 1.862359  | -3.731577 | -0.894007 |
| C  | 3.323568  | -3.215550 | -0.772674 |
| C  | 1.029101  | -3.366274 | 0.323633  |
| H  | -0.027499 | -3.508969 | 0.075716  |
| H  | 1.261533  | -3.996884 | 1.193681  |
| H  | 1.168841  | -2.313605 | 0.609553  |
| C  | 1.729171  | -5.202270 | -1.220132 |
| H  | 2.183888  | -5.825219 | -0.436093 |
| H  | 0.668669  | -5.479031 | -1.292927 |
| H  | 2.203476  | -5.449461 | -2.178119 |
| C  | 4.254453  | -3.836098 | -1.802703 |
| H  | 4.475954  | -4.887315 | -1.570896 |
| H  | 3.824466  | -3.789721 | -2.813121 |
| H  | 5.199956  | -3.279245 | -1.806819 |
| C  | 3.927029  | -3.324784 | 0.609078  |
| H  | 3.355609  | -2.748055 | 1.343076  |
| H  | 3.955769  | -4.370885 | 0.945673  |
| H  | 4.961418  | -2.953151 | 0.602729  |
| Na | 4.088161  | -0.300526 | 0.513990  |
| H  | 1.191171  | -0.290969 | -5.104791 |
| H  | 2.575278  | 0.165745  | -3.097309 |
| H  | -0.547645 | -0.154384 | -4.167093 |
| O  | 5.767314  | -0.040343 | 2.160063  |
| O  | 2.776953  | -0.849501 | 2.763773  |
| C  | 6.144409  | -0.916134 | 3.165371  |
| H  | 5.559858  | -0.696629 | 4.086019  |
| H  | 5.934410  | -1.960257 | 2.851019  |
| C  | 6.582916  | 1.078222  | 2.275776  |
| H  | 6.804392  | 1.482100  | 1.266077  |
| H  | 6.049396  | 1.861996  | 2.857260  |
| C  | 7.872948  | 0.683291  | 2.975943  |
| H  | 8.737047  | 0.726406  | 2.276839  |
| H  | 8.064326  | 1.348350  | 3.846590  |
| C  | 7.621720  | -0.728246 | 3.425174  |
| H  | 7.866449  | -0.870912 | 4.500274  |
| H  | 8.210828  | -1.439686 | 2.805064  |
| C  | 2.620997  | 0.406244  | 3.343649  |
| H  | 3.470277  | 1.062113  | 3.060706  |
| H  | 1.686082  | 0.865689  | 2.965421  |
| C  | 2.553005  | -1.809494 | 3.746259  |
| H  | 1.796886  | -2.540230 | 3.390426  |
| H  | 3.501709  | -2.356176 | 3.935957  |
| C  | 2.082292  | -1.142364 | 5.021222  |
| H  | 0.972579  | -1.176876 | 5.083415  |
| H  | 2.526388  | -1.614069 | 5.924640  |
| C  | 2.543864  | 0.266440  | 4.847466  |
| H  | 1.832531  | 0.993966  | 5.295766  |
| H  | 3.553839  | 0.396354  | 5.295501  |
| O  | 6.009969  | -0.920865 | -0.837127 |
| C  | 7.326098  | -1.242046 | -0.541695 |
| H  | 7.842916  | -0.348258 | -0.127788 |
| H  | 7.353097  | -2.050170 | 0.219649  |
| C  | 6.008984  | -0.435550 | -2.138835 |
| H  | 6.136248  | 0.669397  | -2.120227 |
| H  | 5.039370  | -0.666395 | -2.626067 |
| C  | 8.001653  | -1.693136 | -1.819725 |
| H  | 9.051005  | -1.329069 | -1.869920 |
| H  | 7.984241  | -2.803126 | -1.892405 |
| C  | 7.149706  | -1.085516 | -2.900495 |
| H  | 7.717517  | -0.327997 | -3.483900 |
| H  | 6.765995  | -1.874020 | -3.584984 |

178

Figure\_S6\_imid-3\_modeS1\_ts(CuHadd)\_03 / electronic energy: -3601.991042465432 a.u. / lowest freq: -744.17 cm<sup>-1</sup>

|   |           |          |           |
|---|-----------|----------|-----------|
| C | 0.037342  | 3.228583 | -0.022707 |
| H | 0.781092  | 3.007570 | 0.758681  |
| C | -1.373436 | 2.721216 | 0.330870  |
| H | -2.157112 | 3.395556 | -0.057025 |
| C | -0.446991 | 1.314262 | -1.318832 |
| C | 1.452859  | 2.550584 | -2.091985 |
| C | 1.146725  | 2.685211 | -3.453135 |
| C | 2.797446  | 2.498646 | -1.695655 |

|    |           |           |           |
|----|-----------|-----------|-----------|
| C  | 2.152464  | 2.778456  | -4.409375 |
| H  | 0.093955  | 2.706234  | -3.744604 |
| C  | 3.801928  | 2.614924  | -2.660639 |
| C  | 3.487628  | 2.756031  | -4.009402 |
| H  | 1.890636  | 2.876186  | -5.465250 |
| H  | 4.840561  | 2.554921  | -2.331370 |
| H  | 4.287521  | 2.837328  | -4.748614 |
| C  | -2.519823 | 0.547798  | -0.343565 |
| C  | -3.837685 | 1.033047  | -0.284219 |
| C  | -2.294245 | -0.833947 | -0.259280 |
| C  | -4.912740 | 0.146949  | -0.145300 |
| C  | -3.370252 | -1.717204 | -0.096237 |
| C  | -4.678470 | -1.227415 | -0.051876 |
| H  | -5.508783 | -1.910995 | 0.084457  |
| S  | 3.301725  | 2.186860  | 0.000430  |
| O  | 4.710785  | 1.715218  | -0.117992 |
| O  | 2.416127  | 1.093077  | 0.496896  |
| O  | 3.150374  | 3.466503  | 0.719207  |
| Cu | 0.079040  | 0.036517  | -2.642081 |
| C  | 0.059309  | 4.700870  | -0.346206 |
| C  | 0.714946  | 5.603123  | 0.509385  |
| C  | -0.590540 | 5.196219  | -1.492789 |
| C  | 0.736031  | 6.969444  | 0.214000  |
| H  | 1.202183  | 5.252795  | 1.410217  |
| C  | -0.565841 | 6.562893  | -1.784422 |
| H  | -1.114307 | 4.523876  | -2.160749 |
| C  | 0.098702  | 7.448648  | -0.933000 |
| H  | 1.244207  | 7.657695  | 0.876953  |
| H  | -1.063762 | 6.935536  | -2.670190 |
| H  | 0.115954  | 8.506846  | -1.159522 |
| C  | -1.571815 | 2.521914  | 1.811912  |
| C  | -2.463490 | 3.342599  | 2.523708  |
| C  | -0.896753 | 1.493034  | 2.494229  |
| C  | -2.671782 | 3.138755  | 3.891102  |
| H  | -2.999144 | 4.138821  | 2.022017  |
| C  | -1.115783 | 1.286430  | 3.858725  |
| H  | -0.217559 | 0.840902  | 1.963179  |
| C  | -2.002660 | 2.108832  | 4.556908  |
| H  | -3.359787 | 3.774548  | 4.433124  |
| H  | -0.601001 | 0.486574  | 4.374394  |
| H  | -2.172474 | 1.947444  | 5.613481  |
| N  | 0.357150  | 2.396568  | -1.203565 |
| N  | -1.423109 | 1.442403  | -0.403720 |
| H  | -1.280512 | -1.215092 | -0.270604 |
| H  | -4.034779 | 2.095338  | -0.343457 |
| C  | -3.119397 | -3.152899 | 0.114926  |
| C  | -3.023860 | -4.030474 | -0.998988 |
| C  | -2.914561 | -3.643961 | 1.434480  |
| C  | -2.673683 | -5.374350 | -0.774289 |
| C  | -2.560714 | -4.994700 | 1.606579  |
| C  | -2.438357 | -5.845816 | 0.513132  |
| H  | -2.571696 | -6.064771 | -1.601067 |
| H  | -2.370574 | -5.395192 | 2.593463  |
| H  | -2.160989 | -6.881012 | 0.664907  |
| C  | -6.291010 | 0.660430  | -0.052267 |
| C  | -6.870974 | 0.920891  | 1.220016  |
| C  | -7.061375 | 0.853401  | -1.229458 |
| C  | -8.211034 | 1.356189  | 1.277879  |
| C  | -8.388584 | 1.298374  | -1.092673 |
| C  | -8.935012 | 1.538699  | 0.167042  |
| H  | -8.681947 | 1.549041  | 2.233049  |
| H  | -9.011994 | 1.454035  | -1.963356 |
| H  | -9.961414 | 1.874561  | 0.245906  |
| C  | -6.502171 | 0.579269  | -2.624881 |
| H  | -5.443627 | 0.252153  | -2.574188 |
| C  | -6.512013 | 1.848787  | -3.485139 |
| H  | -5.961035 | 2.662263  | -2.966118 |
| H  | -6.007874 | 1.653744  | -4.455803 |
| H  | -7.548293 | 2.189895  | -3.691236 |
| C  | -7.266438 | -0.559749 | -3.309941 |
| H  | -7.239946 | -1.469902 | -2.672845 |
| H  | -8.324919 | -0.280368 | -3.495908 |
| H  | -6.790673 | -0.805579 | -4.283412 |
| C  | -6.092457 | 0.727439  | 2.522062  |
| H  | -5.041106 | 0.436604  | 2.321600  |
| C  | -6.697938 | -0.405386 | 3.358127  |
| H  | -6.074008 | -0.589051 | 4.258798  |
| H  | -7.728631 | -0.155573 | 3.687284  |
| H  | -6.727259 | -1.341838 | 2.760773  |
| C  | -6.017779 | 2.029927  | 3.328220  |
| H  | -5.362533 | 1.889117  | 4.214100  |
| H  | -5.586910 | 2.839591  | 2.701224  |
| H  | -7.020159 | 2.345378  | 3.685536  |
| C  | -3.046839 | -2.744491 | 2.665257  |
| H  | -3.404405 | -1.732427 | 2.388011  |
| C  | -3.276635 | -3.554586 | -2.429131 |
| H  | -3.595421 | -2.492299 | -2.446713 |
| C  | -1.994826 | -3.630110 | -3.263086 |

|    |           |           |           |
|----|-----------|-----------|-----------|
| H  | -1.206556 | -3.017765 | -2.780066 |
| H  | -1.633825 | -4.675912 | -3.357866 |
| H  | -2.174633 | -3.221879 | -4.280537 |
| C  | -4.415769 | -4.342124 | -3.088424 |
| H  | -4.139255 | -5.406773 | -3.238350 |
| H  | -5.327691 | -4.290802 | -2.455641 |
| H  | -4.657649 | -3.901240 | -4.079206 |
| C  | -1.689482 | -2.542305 | 3.343442  |
| H  | -1.266816 | -3.507447 | 3.693820  |
| H  | -0.982118 | -2.073067 | 2.627250  |
| H  | -1.794635 | -1.863647 | 4.216482  |
| C  | -4.085107 | -3.292275 | 3.652571  |
| H  | -5.052850 | -3.457500 | 3.132401  |
| H  | -3.749972 | -4.248644 | 4.105507  |
| H  | -4.253173 | -2.559799 | 4.470875  |
| C  | 1.895485  | -0.921646 | -2.921264 |
| C  | 0.993065  | -1.068617 | -4.047432 |
| H  | 0.564613  | -2.062050 | -4.220919 |
| B  | 2.041650  | -1.989195 | -1.868200 |
| O  | 1.229166  | -3.117120 | -1.804707 |
| O  | 3.054999  | -2.061291 | -0.894290 |
| C  | 1.610597  | -3.866349 | -0.639936 |
| C  | 3.098790  | -3.445731 | -0.473041 |
| C  | 0.745296  | -3.393910 | 0.516151  |
| H  | -0.307495 | -3.519605 | 0.241166  |
| H  | 0.925464  | -3.969004 | 1.435074  |
| H  | 0.909654  | -2.327055 | 0.724325  |
| C  | 1.391306  | -5.339113 | -0.906762 |
| H  | 1.751695  | -5.952899 | -0.068327 |
| H  | 0.319959  | -5.543881 | -1.034476 |
| H  | 1.903526  | -5.665311 | -1.820171 |
| C  | 4.015800  | -4.192762 | -1.428392 |
| H  | 4.149825  | -5.242105 | -1.131003 |
| H  | 3.628182  | -4.172234 | -2.456490 |
| H  | 4.998111  | -3.708242 | -1.426083 |
| C  | 3.628408  | -3.529298 | 0.938677  |
| H  | 3.067687  | -2.882016 | 1.620329  |
| H  | 3.571514  | -4.558857 | 1.320713  |
| H  | 4.686919  | -3.230045 | 0.972768  |
| Na | 4.320445  | -0.460662 | 0.788796  |
| H  | 1.260291  | -0.575118 | -4.989093 |
| H  | 2.632203  | -0.110169 | -2.980781 |
| H  | -0.481994 | -0.337678 | -4.086550 |
| O  | 6.142866  | 0.299906  | 2.330301  |
| O  | 3.456917  | -0.867204 | 3.012100  |
| C  | 5.667507  | 1.399951  | 3.041470  |
| H  | 4.615013  | 1.608771  | 2.757307  |
| H  | 5.696624  | 1.163445  | 4.126639  |
| C  | 7.334386  | 0.671601  | 1.715712  |
| H  | 8.099866  | -0.116719 | 1.876949  |
| H  | 7.162869  | 0.780441  | 0.624638  |
| C  | 7.808793  | 1.989711  | 2.285248  |
| H  | 8.494702  | 1.810236  | 3.142874  |
| H  | 8.312286  | 2.617458  | 1.518140  |
| C  | 6.538523  | 2.607531  | 2.765365  |
| H  | 6.088431  | 3.229128  | 1.960268  |
| H  | 6.696656  | 3.223981  | 3.676966  |
| C  | 2.122592  | -0.756220 | 3.372600  |
| H  | 1.973107  | 0.187085  | 3.943005  |
| H  | 1.495190  | -0.721942 | 2.459922  |
| C  | 4.084455  | -1.576137 | 4.027862  |
| H  | 4.931144  | -2.158624 | 3.606559  |
| H  | 4.485666  | -0.864200 | 4.781933  |
| C  | 3.073202  | -2.502247 | 4.674079  |
| H  | 3.210379  | -3.544162 | 4.308639  |
| H  | 3.163418  | -2.480021 | 5.782153  |
| C  | 1.748737  | -1.955994 | 4.220854  |
| H  | 1.216796  | -2.713991 | 3.607698  |
| H  | 1.112091  | -1.655056 | 5.081307  |
| O  | 6.133820  | -1.317920 | -0.636576 |
| C  | 7.287706  | -2.084892 | -0.731305 |
| H  | 8.142958  | -1.518476 | -0.302434 |
| H  | 7.157781  | -3.018834 | -0.144334 |
| C  | 5.982082  | -0.677516 | -1.859296 |
| H  | 6.524144  | 0.294026  | -1.837641 |
| H  | 4.908800  | -0.474931 | -2.050186 |
| C  | 7.552476  | -2.410384 | -2.193008 |
| H  | 8.592215  | -2.132156 | -2.473205 |
| H  | 7.389175  | -3.491174 | -2.398470 |
| C  | 6.553845  | -1.569434 | -2.937282 |
| H  | 7.033651  | -0.973590 | -3.744001 |
| H  | 5.752310  | -2.209761 | -3.367632 |

178

Figure\_S6\_imid-3\_modeS1\_ts(CuHadd)\_04 / electronic energy: -3601.991022371877 a.u. / lowest freq: -759.06 cm<sup>-1</sup>

|   |           |          |          |
|---|-----------|----------|----------|
| C | -0.134743 | 3.357697 | 0.249231 |
| H | 0.660428  | 3.259496 | 1.002786 |
| C | -1.446199 | 2.648583 | 0.655926 |
| H | -2.330633 | 3.283762 | 0.480842 |



|    |            |           |           |
|----|------------|-----------|-----------|
| C  | -0.490867  | 1.504816  | -1.185975 |
| C  | 1.369341   | 2.923364  | -1.785900 |
| C  | 1.096540   | 3.209988  | -3.129104 |
| C  | 2.699552   | 2.953583  | -1.334604 |
| C  | 2.118226   | 3.552274  | -4.009704 |
| H  | 0.057794   | 3.159883  | -3.466282 |
| C  | 3.714787   | 3.327162  | -2.217636 |
| C  | 3.430677   | 3.632852  | -3.546743 |
| H  | 1.885020   | 3.769198  | -5.054353 |
| H  | 4.741775   | 3.335359  | -1.847134 |
| H  | 4.239368   | 3.916788  | -4.223751 |
| C  | -2.500768  | 0.529924  | -0.263612 |
| C  | -3.847679  | 0.922699  | -0.209093 |
| C  | -2.179009  | -0.834315 | -0.218130 |
| C  | -4.860038  | -0.038602 | -0.103540 |
| C  | -3.192510  | -1.793861 | -0.086737 |
| C  | -4.531304  | -1.395004 | -0.038149 |
| H  | -5.314030  | -2.137021 | 0.072526  |
| S  | 3.164802   | 2.346502  | 0.294380  |
| O  | 4.629158   | 2.079218  | 0.202738  |
| O  | 2.399168   | 1.076276  | 0.432106  |
| O  | 2.818153   | 3.390598  | 1.279941  |
| Cu | -0.016024  | 0.361160  | -2.637739 |
| C  | -0.334680  | 4.816980  | -0.079222 |
| C  | 0.317044   | 5.809622  | 0.673600  |
| C  | -1.165604  | 5.204796  | -1.147637 |
| C  | 0.142090   | 7.161354  | 0.362156  |
| H  | 0.958363   | 5.540777  | 1.503169  |
| C  | -1.336520  | 6.557324  | -1.455380 |
| H  | -1.677036  | 4.458950  | -1.743500 |
| C  | -0.683097  | 7.534904  | -0.701404 |
| H  | 0.646817   | 7.919992  | 0.946249  |
| H  | -1.975421  | 6.847501  | -2.279382 |
| H  | -0.816534  | 8.581918  | -0.940887 |
| C  | -1.446663  | 2.193946  | 2.094641  |
| C  | -2.349040  | 2.755625  | 3.014930  |
| C  | -0.566718  | 1.185364  | 2.529857  |
| C  | -2.365731  | 2.320172  | 4.343493  |
| H  | -3.039314  | 3.530764  | 2.706612  |
| C  | -0.588987  | 0.753244  | 3.858204  |
| H  | 0.126157   | 0.725396  | 1.838284  |
| C  | -1.488020  | 1.318579  | 4.764179  |
| H  | -3.060463  | 2.759254  | 5.047545  |
| H  | 0.087937   | -0.023381 | 4.185032  |
| H  | -1.504486  | 0.980400  | 5.792096  |
| N  | 0.271813   | 2.593514  | -0.950652 |
| N  | -1.472525  | 1.501122  | -0.269975 |
| H  | -1.141237  | -1.140653 | -0.232919 |
| H  | -4.112647  | 1.971688  | -0.243607 |
| C  | -2.855112  | -3.217546 | 0.085254  |
| C  | -2.837873  | -4.086882 | -1.040246 |
| C  | -2.597066  | -3.727765 | 1.389027  |
| C  | -2.541096  | -5.447354 | -0.840767 |
| C  | -2.282438  | -5.091464 | 1.531808  |
| C  | -2.253626  | -5.937620 | 0.428579  |
| H  | -2.530312  | -6.138879 | -1.672738 |
| H  | -2.073731  | -5.511756 | 2.506704  |
| H  | -2.019263  | -6.986134 | 0.560237  |
| C  | -6.272429  | 0.373628  | -0.020574 |
| C  | -6.845894  | 0.709163  | 1.236945  |
| C  | -7.079968  | 0.389111  | -1.188780 |
| C  | -8.213397  | 1.049841  | 1.288974  |
| C  | -8.435502  | 0.740458  | -1.058197 |
| C  | -8.972265  | 1.065343  | 0.186570  |
| H  | -8.678094  | 1.301190  | 2.233553  |
| H  | -9.087470  | 0.758896  | -1.921646 |
| H  | -10.019769 | 1.329340  | 0.261163  |
| C  | -6.528325  | 0.027017  | -2.567260 |
| H  | -5.443514  | -0.198582 | -2.517049 |
| C  | -6.669705  | 1.197796  | -3.547719 |
| H  | -6.184816  | 2.104801  | -3.127196 |
| H  | -6.168770  | 0.951014  | -4.508229 |
| H  | -7.736228  | 1.423831  | -3.757650 |
| C  | -7.202915  | -1.236626 | -3.113604 |
| H  | -7.091914  | -2.069303 | -2.386471 |
| H  | -8.283778  | -1.066143 | -3.302732 |
| H  | -6.721435  | -1.543385 | -4.066772 |
| C  | -6.032890  | 0.688878  | 2.532181  |
| H  | -4.971822  | 0.431434  | 2.337472  |
| C  | -6.558150  | -0.383236 | 3.493737  |
| H  | -5.898058  | -0.451116 | 4.384970  |
| H  | -7.588624  | -0.148797 | 3.834523  |
| H  | -6.561400  | -1.373793 | 2.990300  |
| C  | -6.015426  | 2.069605  | 3.199103  |
| H  | -5.353016  | 2.051937  | 4.089907  |
| H  | -5.623212  | 2.828202  | 2.488435  |
| H  | -7.030533  | 2.374647  | 3.528556  |
| C  | -2.684892  | -2.850124 | 2.640393  |

|    |           |           |           |
|----|-----------|-----------|-----------|
| H  | -2.953536 | -1.805375 | 2.383311  |
| C  | -3.165290 | -3.596030 | -2.450730 |
| H  | -3.315766 | -2.497199 | -2.466459 |
| C  | -2.014686 | -3.875310 | -3.425011 |
| H  | -1.072549 | -3.451544 | -3.024456 |
| H  | -1.876280 | -4.963943 | -3.591751 |
| H  | -2.221479 | -3.394811 | -4.405130 |
| C  | -4.473859 | -4.216433 | -2.952762 |
| H  | -4.378959 | -5.317244 | -3.065025 |
| H  | -5.295135 | -3.997751 | -2.237155 |
| H  | -4.748360 | -3.781949 | -3.937814 |
| C  | -1.336526 | -2.769880 | 3.364504  |
| H  | -0.986724 | -3.771649 | 3.689784  |
| H  | -0.578338 | -2.320826 | 2.691255  |
| H  | -1.424255 | -2.122156 | 4.262463  |
| C  | -3.788610 | -3.345311 | 3.582708  |
| H  | -4.753457 | -3.409096 | 3.035319  |
| H  | -3.543947 | -4.344448 | 4.000646  |
| H  | -3.917034 | -2.632893 | 4.425718  |
| C  | 1.743027  | -0.595964 | -3.164275 |
| C  | 0.697793  | -0.717828 | -4.164046 |
| H  | 0.217203  | -1.696418 | -4.276164 |
| B  | 2.007675  | -1.661929 | -2.133833 |
| O  | 1.161064  | -2.744108 | -1.917065 |
| O  | 3.169191  | -1.790826 | -1.343717 |
| C  | 1.714051  | -3.539166 | -0.856880 |
| C  | 3.224659  | -3.183005 | -0.950370 |
| C  | 1.096828  | -3.075795 | 0.452752  |
| H  | 0.007992  | -3.176222 | 0.385485  |
| H  | 1.433401  | -3.682279 | 1.305879  |
| H  | 1.327272  | -2.019808 | 0.660089  |
| C  | 1.389980  | -4.994844 | -1.113667 |
| H  | 1.870962  | -5.647009 | -0.370116 |
| H  | 0.306601  | -5.155186 | -1.046462 |
| H  | 1.709479  | -5.313177 | -2.113728 |
| C  | 3.933206  | -3.946796 | -2.057832 |
| H  | 4.066532  | -5.007589 | -1.804218 |
| H  | 3.380440  | -3.885222 | -3.005483 |
| H  | 4.928095  | -3.513569 | -2.220462 |
| C  | 3.985769  | -3.314332 | 0.348298  |
| H  | 3.582395  | -2.650847 | 1.121700  |
| H  | 3.934768  | -4.343564 | 0.731012  |
| H  | 5.048703  | -3.074495 | 0.205204  |
| Na | 4.381261  | -0.348248 | 0.319618  |
| H  | 0.857359  | -0.235537 | -5.134944 |
| H  | 2.483306  | 0.192016  | -3.342307 |
| H  | -0.749149 | 0.066695  | -4.021632 |
| O  | 6.386433  | -1.048682 | 1.475828  |
| O  | 3.443598  | -0.766527 | 2.818279  |
| C  | 7.242787  | 0.025774  | 1.673429  |
| H  | 8.234036  | -0.205839 | 1.223602  |
| H  | 6.833867  | 0.928470  | 1.175063  |
| C  | 6.549305  | -1.881051 | 2.574440  |
| H  | 5.609746  | -2.436037 | 2.770725  |
| H  | 7.350282  | -2.622183 | 2.356339  |
| C  | 6.927856  | -1.034486 | 3.773949  |
| H  | 6.045381  | -0.871003 | 4.429578  |
| H  | 7.742449  | -1.515115 | 4.358537  |
| C  | 7.380877  | 0.263356  | 3.164502  |
| H  | 8.433843  | 0.495830  | 3.435629  |
| H  | 6.718550  | 1.096059  | 3.488526  |
| C  | 2.782258  | -1.673401 | 3.634596  |
| H  | 1.724301  | -1.759811 | 3.305590  |
| H  | 3.256602  | -2.673690 | 3.550727  |
| C  | 3.290213  | 0.475956  | 3.419678  |
| H  | 4.161377  | 1.118907  | 3.174271  |
| H  | 2.370257  | 0.964343  | 3.034257  |
| C  | 3.179144  | 0.281897  | 4.919294  |
| H  | 4.145312  | 0.518483  | 5.416798  |
| H  | 2.374768  | 0.921516  | 5.344374  |
| C  | 2.853216  | -1.178261 | 5.065247  |
| H  | 3.664428  | -1.702820 | 5.616831  |
| H  | 1.884386  | -1.330915 | 5.589265  |
| O  | 6.131665  | -0.256707 | -1.372614 |
| C  | 7.052143  | -1.222099 | -1.767469 |
| H  | 8.075619  | -0.891854 | -1.487230 |
| H  | 6.835146  | -2.168888 | -1.230309 |
| C  | 5.617125  | 0.326581  | -2.521281 |
| H  | 6.185523  | 1.256092  | -2.745604 |
| H  | 4.555135  | 0.592637  | -2.357659 |
| C  | 6.958737  | -1.442030 | -3.268899 |
| H  | 7.862243  | -1.032847 | -3.772969 |
| H  | 6.844255  | -2.517961 | -3.524093 |
| C  | 5.748945  | -0.653438 | -3.661106 |
| H  | 5.884085  | -0.137001 | -4.636117 |
| H  | 4.855580  | -1.314810 | -3.700084 |

178

Figure\_S6\_imid-3\_modeS1\_ts(CuHadd)\_05 / electronic energy: -3601.976710824634 a.u. / lowest freq: -675.01 cm<sup>-1</sup>

|    |           |           |           |
|----|-----------|-----------|-----------|
| C  | -0.373716 | -3.132179 | -0.725216 |
| H  | -1.294636 | -3.169701 | -0.127482 |
| C  | 0.865836  | -2.712756 | 0.101989  |
| H  | 1.670695  | -3.460956 | 0.024810  |
| C  | 0.485385  | -1.088454 | -1.582302 |
| C  | -1.394666 | -1.983794 | -2.793037 |
| C  | -0.849178 | -1.836946 | -4.077723 |
| C  | -2.793333 | -2.048101 | -2.659288 |
| C  | -1.658388 | -1.740123 | -5.203871 |
| H  | 0.239995  | -1.805285 | -4.175212 |
| C  | -3.598232 | -1.960080 | -3.798751 |
| C  | -3.043128 | -1.805291 | -5.065573 |
| H  | -1.201798 | -1.621166 | -6.189140 |
| H  | -4.680605 | -1.993539 | -3.663634 |
| H  | -3.693254 | -1.735056 | -5.940082 |
| C  | 2.417397  | -0.720281 | -0.167941 |
| C  | 3.624257  | -1.379908 | 0.120416  |
| C  | 2.335027  | 0.670578  | 0.016186  |
| C  | 4.727709  | -0.663253 | 0.596821  |
| C  | 3.439351  | 1.383242  | 0.507719  |
| C  | 4.633047  | 0.715596  | 0.793505  |
| H  | 5.481560  | 1.265834  | 1.184509  |
| S  | -3.637438 | -2.251773 | -1.087238 |
| O  | -5.018953 | -1.733193 | -1.309880 |
| O  | -2.909100 | -1.392496 | -0.106950 |
| O  | -3.577288 | -3.694848 | -0.787966 |
| Cu | 0.580119  | 0.318138  | -2.882159 |
| C  | -0.170423 | -4.456401 | -1.423875 |
| C  | -0.941578 | -5.575347 | -1.063775 |
| C  | 0.807968  | -4.596383 | -2.427155 |
| C  | -0.753204 | -6.801421 | -1.708695 |
| H  | -1.680876 | -5.505015 | -0.276859 |
| C  | 0.991935  | -5.823882 | -3.069500 |
| H  | 1.427081  | -3.754981 | -2.711982 |
| C  | 0.210203  | -6.924918 | -2.712609 |
| H  | -1.352093 | -7.657739 | -1.426745 |
| H  | 1.742616  | -5.921879 | -3.842972 |
| H  | 0.354756  | -7.875243 | -3.209983 |
| C  | 0.558396  | -2.481615 | 1.561930  |
| C  | 1.111002  | -3.322718 | 2.543881  |
| C  | -0.252592 | -1.404648 | 1.963811  |
| C  | 0.852428  | -3.092395 | 3.898458  |
| H  | 1.741976  | -4.156746 | 2.263377  |
| C  | -0.504248 | -1.175778 | 3.319602  |
| H  | -0.672501 | -0.734409 | 1.227019  |
| C  | 0.047903  | -2.018541 | 4.286039  |
| H  | 1.278533  | -3.745723 | 4.648653  |
| H  | -1.122861 | -0.342593 | 3.623539  |
| H  | -0.146999 | -1.838916 | 5.335341  |
| N  | -0.486147 | -2.025541 | -1.705294 |
| N  | 1.276347  | -1.462445 | -0.562623 |
| H  | 1.402185  | 1.188030  | -0.174706 |
| H  | 3.712157  | -2.449059 | -0.020930 |
| C  | 3.333406  | 2.823728  | 0.798352  |
| C  | 3.801546  | 3.777700  | -0.147339 |
| C  | 2.800548  | 3.254198  | 2.046016  |
| C  | 3.696120  | 5.145962  | 0.162084  |
| C  | 2.703568  | 4.634314  | 2.301153  |
| C  | 3.142685  | 5.566121  | 1.366847  |
| H  | 4.044403  | 5.898476  | -0.532920 |
| H  | 2.292095  | 4.996574  | 3.233951  |
| H  | 3.063600  | 6.623772  | 1.583022  |
| C  | 5.981448  | -1.361938 | 0.930270  |
| C  | 6.164044  | -1.920790 | 2.225217  |
| C  | 7.032190  | -1.434479 | -0.022265 |
| C  | 7.396312  | -2.534655 | 2.530810  |
| C  | 8.231660  | -2.064826 | 0.354466  |
| C  | 8.384844  | -2.603640 | 1.631011  |
| H  | 7.566454  | -2.959504 | 3.511573  |
| H  | 9.059736  | -2.136580 | -0.338419 |
| H  | 9.319730  | -3.080305 | 1.898026  |
| C  | 6.904214  | -0.841800 | -1.425070 |
| H  | 5.897152  | -0.404971 | -1.584058 |
| C  | 7.069699  | -1.921297 | -2.501750 |
| H  | 6.344611  | -2.744924 | -2.327045 |
| H  | 6.868594  | -1.489962 | -3.505704 |
| H  | 8.097923  | -2.340095 | -2.500718 |
| C  | 7.903493  | 0.302533  | -1.630613 |
| H  | 7.767330  | 1.070361  | -0.839225 |
| H  | 8.950336  | -0.066390 | -1.597514 |
| H  | 7.730446  | 0.786695  | -2.615531 |
| C  | 5.076893  | -1.854576 | 3.298982  |
| H  | 4.154750  | -1.377224 | 2.909107  |
| C  | 5.529072  | -0.995610 | 4.485356  |
| H  | 4.695681  | -0.880319 | 5.211165  |
| H  | 6.393119  | -1.455814 | 5.009447  |
| H  | 5.819802  | 0.016422  | 4.130270  |
| C  | 4.661151  | -3.257441 | 3.757996  |

|    |           |           |           |
|----|-----------|-----------|-----------|
| H  | 3.811613  | -3.186833 | 4.469493  |
| H  | 4.334162  | -3.860309 | 2.883954  |
| H  | 5.496195  | -3.782793 | 4.266646  |
| C  | 2.343588  | 2.265795  | 3.120880  |
| H  | 2.490937  | 1.216576  | 2.793752  |
| C  | 4.436362  | 3.362619  | -1.475152 |
| H  | 4.423748  | 2.260560  | -1.598367 |
| C  | 3.656995  | 3.925999  | -2.668707 |
| H  | 2.597638  | 3.607635  | -2.605790 |
| H  | 3.699563  | 5.034834  | -2.697454 |
| H  | 4.078930  | 3.533526  | -3.618538 |
| C  | 5.909870  | 3.781781  | -1.531958 |
| H  | 6.014040  | 4.887348  | -1.528964 |
| H  | 6.455435  | 3.366654  | -0.657620 |
| H  | 6.383353  | 3.384769  | -2.455369 |
| C  | 0.845646  | 2.412953  | 3.403920  |
| H  | 0.607676  | 3.411608  | 3.826236  |
| H  | 0.277301  | 2.274874  | 2.461885  |
| H  | 0.514525  | 1.637329  | 4.126681  |
| C  | 3.167857  | 2.421705  | 4.404276  |
| H  | 4.250039  | 2.320077  | 4.173569  |
| H  | 2.991442  | 3.408995  | 4.880547  |
| H  | 2.893690  | 1.626764  | 5.130622  |
| C  | -0.722896 | 1.704235  | -3.699746 |
| C  | 0.521090  | 1.587475  | -4.433891 |
| H  | 1.217456  | 2.431873  | -4.383144 |
| B  | -0.965739 | 2.844040  | -2.740579 |
| O  | 0.034099  | 3.716729  | -2.318176 |
| O  | -2.208077 | 3.231897  | -2.233439 |
| C  | -0.544542 | 4.591961  | -1.337487 |
| C  | -2.047198 | 4.580132  | -1.750023 |
| C  | -0.319537 | 3.958797  | 0.026489  |
| H  | 0.753490  | 3.786115  | 0.161155  |
| H  | -0.667447 | 4.596551  | 0.851328  |
| H  | -0.821923 | 2.983690  | 0.095225  |
| C  | 0.127742  | 5.944757  | -1.415971 |
| H  | -0.357362 | 6.667695  | -0.743889 |
| H  | 1.180285  | 5.863524  | -1.114003 |
| H  | 0.108428  | 6.350808  | -2.434534 |
| C  | -2.334548 | 5.519782  | -2.913071 |
| H  | -2.302709 | 6.575447  | -2.608912 |
| H  | -1.613270 | 5.375122  | -3.729450 |
| H  | -3.337556 | 5.312190  | -3.309905 |
| C  | -3.015168 | 4.844114  | -0.619395 |
| H  | -2.919042 | 4.103247  | 0.180432  |
| H  | -2.844237 | 5.838808  | -0.182352 |
| H  | -4.049888 | 4.817521  | -0.987467 |
| Na | -4.816022 | -0.227809 | 0.614033  |
| H  | 0.494754  | 1.145681  | -5.436983 |
| H  | -1.574325 | 1.121163  | -4.073005 |
| H  | 1.715106  | 0.502120  | -3.992244 |
| O  | -6.227317 | -1.582236 | 1.840725  |
| O  | -3.585523 | 0.571832  | 2.471810  |
| C  | -6.031776 | -1.960846 | 3.164898  |
| H  | -4.948261 | -2.131347 | 3.344512  |
| H  | -6.371966 | -1.135800 | 3.826328  |
| C  | -6.888539 | -2.621077 | 1.200159  |
| H  | -7.578660 | -2.211223 | 0.432615  |
| H  | -6.143031 | -3.276069 | 0.698777  |
| C  | -7.654893 | -3.410729 | 2.233368  |
| H  | -8.664134 | -2.965632 | 2.379141  |
| H  | -7.745946 | -4.482301 | 1.951652  |
| C  | -6.825825 | -3.221532 | 3.464834  |
| H  | -6.137720 | -4.085218 | 3.600746  |
| H  | -7.462442 | -3.103335 | 4.368859  |
| C  | -2.855698 | 1.630053  | 1.939587  |
| H  | -1.799388 | 1.315202  | 1.823832  |
| H  | -3.251003 | 1.886379  | 0.936296  |
| C  | -4.002893 | 0.936189  | 3.746849  |
| H  | -5.099273 | 1.118089  | 3.726926  |
| H  | -3.793165 | 0.110755  | 4.459874  |
| C  | -3.282098 | 2.196367  | 4.172663  |
| H  | -3.926197 | 2.854545  | 4.795313  |
| H  | -2.351459 | 1.936403  | 4.724858  |
| C  | -2.940974 | 2.825721  | 2.864060  |
| H  | -3.764593 | 3.500437  | 2.541463  |
| H  | -1.985185 | 3.390208  | 2.909079  |
| O  | -6.209012 | 1.588352  | 0.811333  |
| C  | -7.480813 | 1.380638  | 1.334551  |
| H  | -7.945868 | 0.516431  | 0.812413  |
| H  | -7.406074 | 1.139968  | 2.416384  |
| C  | -6.215398 | 2.786066  | 0.106339  |
| H  | -5.767036 | 2.632270  | -0.898191 |
| H  | -5.598943 | 3.527449  | 0.658897  |
| C  | -8.323070 | 2.620813  | 1.125166  |
| H  | -9.379330 | 2.370627  | 0.884968  |
| H  | -8.280651 | 3.267655  | 2.029592  |
| C  | -7.635804 | 3.293207  | -0.017834 |

H -8.078396 2.955852 -0.981355  
H -7.689739 4.401004 0.058987  
178

Figure\_S6\_imid-3\_modeS1\_ts(CuHadd)\_06 / electronic energy: -3601.984496122795 a.u. / lowest freq: -759.34 cm-1

C 0.085254 3.109095 -0.243743  
H 0.902674 2.946550 0.474283  
C -1.282265 2.607629 0.274658  
H -2.099209 3.304760 0.019490  
C -0.543037 1.174253 -1.453502  
C 1.359452 2.329321 -2.359348  
C 0.986554 2.380777 -3.709992  
C 2.726280 2.332879 -2.033068  
C 1.941642 2.444075 -4.719805  
H -0.079272 2.368072 -3.951530  
C 3.677026 2.426473 -3.051973  
C 3.295549 2.482215 -4.389013  
H 1.624370 2.476660 -5.764375  
H 4.731054 2.417029 -2.769629  
H 4.055567 2.545468 -5.170819  
C -2.558321 0.490730 -0.310779  
C -3.863100 1.004863 -0.237110  
C -2.347605 -0.881271 -0.114441  
C -4.942966 0.154148 0.030773  
C -3.426454 -1.726159 0.179006  
C -4.723011 -1.209393 0.242448  
H -5.556107 -1.863302 0.474449  
S 3.323972 2.098927 -0.355253  
O 4.738592 1.646084 -0.508009  
O 2.466594 1.010229 0.192140  
O 3.190907 3.403119 0.321466  
Cu -0.154876 -0.193812 -2.726696  
C 0.048211 4.561249 -0.647541  
C 0.750877 5.521974 0.100392  
C -0.707920 4.979505 -1.759021  
C 0.714710 6.869872 -0.268870  
H 1.317603 5.232069 0.975968  
C -0.740113 6.328048 -2.124797  
H -1.270737 4.261094 -2.341987  
C -0.027471 7.272238 -1.381926  
H 1.259326 7.603661 0.311101  
H -1.319743 6.641388 -2.983420  
H -0.054632 8.316374 -1.665537  
C -1.293317 2.355557 1.764213  
C -2.080471 3.167721 2.605009  
C -0.573899 1.336590 2.299766  
C -2.109109 2.919769 3.979324  
H -2.664734 3.984770 2.200615  
C -0.594363 1.076762 3.621130  
H 0.030037 0.705058 1.660022  
C -1.360230 1.859946 4.491740  
H -2.705199 3.538791 4.636949  
H -0.008837 0.256915 4.016694  
H -1.369836 1.646786 5.552670  
N 0.313458 2.221628 -1.406451  
N -1.454860 1.358214 -0.487124  
H -1.341330 -1.278090 -0.141154  
H -4.042662 2.062159 -0.384576  
C -3.193657 -3.146535 0.489348  
C -3.215162 -4.114842 -0.551581  
C -2.943701 -3.543277 1.833278  
C -2.946236 -5.458208 -0.232424  
C -2.680884 -4.899348 2.100363  
C -2.675102 -5.841259 1.076921  
H -2.947669 -6.219933 -1.000847  
H -2.480969 -5.235612 3.109116  
H -2.468724 -6.879688 1.302107  
C -6.312065 0.691643 0.120756  
C -6.791886 1.204320 1.358076  
C -7.169715 0.637584 -1.013007  
C -8.123481 1.652374 1.434678  
C -8.493602 1.095499 -0.883959  
C -8.960951 1.598465 0.325528  
H -8.524694 2.038439 2.362411  
H -9.175738 1.058607 -1.723076  
H -9.983762 1.943748 0.405816  
C -6.702764 0.081721 -2.359125  
H -5.629542 -0.195936 -2.327747  
C -6.829383 1.130528 -3.471317  
H -6.287419 2.056528 -3.182595  
H -6.378383 0.743891 -4.410238  
H -7.891619 1.382279 -3.672984  
C -7.464482 -1.199688 -2.716984  
H -7.348850 -1.948011 -1.903659  
H -8.545591 -0.996022 -2.868185  
H -7.053209 -1.639059 -3.650959  
C -5.916296 1.257097 2.611400  
H -4.887298 0.901259 2.400123  
C -6.466361 0.333522 3.704363

|    |           |           |           |
|----|-----------|-----------|-----------|
| H  | -5.768013 | 0.308350  | 4.568238  |
| H  | -7.458790 | 0.679762  | 4.062409  |
| H  | -6.565700 | -0.700782 | 3.310642  |
| C  | -5.766066 | 2.694036  | 3.125425  |
| H  | -5.068462 | 2.716487  | 3.988774  |
| H  | -5.349490 | 3.341016  | 2.323973  |
| H  | -6.739696 | 3.111236  | 3.456998  |
| C  | -2.964778 | -2.546247 | 2.994395  |
| H  | -3.187411 | -1.519060 | 2.640599  |
| C  | -3.535708 | -3.743269 | -1.999587 |
| H  | -3.724760 | -2.655267 | -2.102270 |
| C  | -2.356209 | -4.056405 | -2.925818 |
| H  | -1.450098 | -3.532442 | -2.561390 |
| H  | -2.150630 | -5.146503 | -2.968760 |
| H  | -2.572695 | -3.697047 | -3.954513 |
| C  | -4.815144 | -4.439912 | -2.477799 |
| H  | -4.683880 | -5.541749 | -2.518042 |
| H  | -5.655301 | -4.201331 | -1.790806 |
| H  | -5.087004 | -4.080386 | -3.493347 |
| C  | -1.599609 | -2.464142 | 3.687216  |
| H  | -1.303736 | -3.441922 | 4.121188  |
| H  | -0.826275 | -2.141141 | 2.959567  |
| H  | -1.634089 | -1.714423 | 4.506169  |
| C  | -4.072100 | -2.893390 | 3.996568  |
| H  | -5.049960 | -2.958360 | 3.472945  |
| H  | -3.869102 | -3.860422 | 4.502992  |
| H  | -4.147282 | -2.099609 | 4.770450  |
| C  | 1.620913  | -1.219577 | -3.007712 |
| C  | 0.648272  | -1.464685 | -4.056333 |
| H  | 0.188113  | -2.458719 | -4.088800 |
| B  | 1.806172  | -2.163642 | -1.847091 |
| O  | 0.972013  | -3.252864 | -1.610935 |
| O  | 2.874270  | -2.162449 | -0.935347 |
| C  | 1.419280  | -3.899971 | -0.409250 |
| C  | 2.919163  | -3.489166 | -0.364310 |
| C  | 0.635784  | -3.319800 | 0.755468  |
| H  | -0.432322 | -3.461483 | 0.562587  |
| H  | 0.872915  | -3.817733 | 1.706240  |
| H  | 0.819279  | -2.241452 | 0.869423  |
| C  | 1.165365  | -5.387303 | -0.528948 |
| H  | 1.581349  | -5.933130 | 0.330589  |
| H  | 0.084828  | -5.583214 | -0.556479 |
| H  | 1.599792  | -5.802555 | -1.446636 |
| C  | 3.790428  | -4.356610 | -1.260460 |
| H  | 3.910605  | -5.369864 | -0.851703 |
| H  | 3.362797  | -4.443157 | -2.269440 |
| H  | 4.785731  | -3.901308 | -1.347617 |
| C  | 3.516962  | -3.411654 | 1.021591  |
| H  | 3.015612  | -2.652777 | 1.639984  |
| H  | 3.431537  | -4.375330 | 1.544452  |
| H  | 4.588261  | -3.174467 | 0.952622  |
| Na | 4.403555  | -0.479338 | 0.533798  |
| H  | 0.870851  | -1.092526 | -5.063082 |
| H  | 2.358197  | -0.431087 | -3.202077 |
| H  | -0.798403 | -0.701282 | -4.096667 |
| O  | 4.327402  | 0.795117  | 2.707785  |
| O  | 6.229578  | -1.537616 | 2.027310  |
| C  | 3.108969  | 0.782494  | 3.371359  |
| H  | 2.361286  | 0.220512  | 2.774383  |
| H  | 3.233330  | 0.267641  | 4.349611  |
| C  | 4.939182  | 2.015940  | 2.978215  |
| H  | 5.815862  | 1.850465  | 3.640303  |
| H  | 5.307554  | 2.457328  | 2.029466  |
| C  | 3.950224  | 2.958137  | 3.643884  |
| H  | 4.244537  | 3.140190  | 4.701215  |
| H  | 3.877940  | 3.927397  | 3.104031  |
| C  | 2.657952  | 2.207112  | 3.589419  |
| H  | 2.052210  | 2.552224  | 2.724615  |
| H  | 2.073201  | 2.315459  | 4.528648  |
| C  | 7.365908  | -0.764732 | 2.247779  |
| H  | 8.205967  | -1.156204 | 1.635969  |
| H  | 7.158439  | 0.278359  | 1.927335  |
| C  | 5.795393  | -2.023867 | 3.257102  |
| H  | 4.696274  | -1.898069 | 3.346616  |
| H  | 6.029431  | -3.109221 | 3.315673  |
| C  | 6.495093  | -1.285742 | 4.375870  |
| H  | 5.873968  | -0.430027 | 4.719502  |
| H  | 6.720092  | -1.954949 | 5.234662  |
| C  | 7.739145  | -0.790168 | 3.716755  |
| H  | 8.027560  | 0.217472  | 4.087939  |
| H  | 8.572247  | -1.507852 | 3.887056  |
| O  | 5.839428  | -1.464531 | -1.219536 |
| C  | 5.323958  | -1.083071 | -2.457154 |
| H  | 4.854482  | -1.966095 | -2.940719 |
| H  | 4.546746  | -0.307365 | -2.311378 |
| C  | 7.207699  | -1.224328 | -1.236728 |
| H  | 7.742884  | -2.068809 | -0.753307 |
| H  | 7.416345  | -0.293340 | -0.666372 |

C 6.435099 -0.550995 -3.340426  
H 6.351486 -0.924699 -4.384179  
H 6.429740 0.561529 -3.335571  
C 7.666402 -1.059522 -2.666812  
H 7.954247 -2.047169 -3.090814  
H 8.513434 -0.344522 -2.751827

178

Figure\_S6\_imid-3\_modeS1\_prod(CuHadd) / electronic energy: -3602.027352408956 a.u. / lowest freq: 8.03 cm<sup>-1</sup>

C -0.309630 3.574231 0.231764  
H 0.402455 3.714549 1.056636  
C -1.589750 2.817866 0.656909  
H -2.495784 3.412396 0.464252  
C -0.431779 1.517175 -0.951091  
C 1.474984 2.905263 -1.481724  
C 1.335871 3.265088 -2.827061  
C 2.756559 2.835131 -0.918827  
C 2.450720 3.576581 -3.599498  
H 0.333934 3.291377 -3.262051  
C 3.869274 3.169463 -1.692259  
C 3.720821 3.544684 -3.025370  
H 2.324597 3.848132 -4.649638  
H 4.855930 3.104221 -1.229704  
H 4.600810 3.799566 -3.619908  
C -2.573222 0.640544 -0.207753  
C -3.925663 1.022502 -0.195862  
C -2.246032 -0.722866 -0.120273  
C -4.934201 0.058599 -0.082732  
C -3.259400 -1.685528 0.005411  
C -4.600081 -1.292904 0.021113  
H -5.381209 -2.036499 0.133018  
S 3.017586 2.130525 0.713138  
O 4.498915 2.050200 0.852727  
O 2.421533 0.765422 0.611260  
O 2.366644 3.022266 1.692067  
Cu 0.490881 0.247389 -2.080456  
C -0.596177 4.903092 -0.426697  
C -0.028000 6.082298 0.086438  
C -1.417941 4.980337 -1.567315  
C -0.278207 7.312781 -0.528497  
H 0.611004 6.051125 0.960176  
C -1.664511 6.212723 -2.178611  
H -1.863932 4.085988 -1.984289  
C -1.095389 7.378062 -1.659708  
H 0.163033 8.216399 -0.128200  
H -2.296371 6.263964 -3.055816  
H -1.287054 8.331623 -2.134444  
C -1.577450 2.405827 2.110364  
C -2.553271 2.897161 2.995625  
C -0.613554 1.500440 2.592439  
C -2.560223 2.493640 4.334392  
H -3.309665 3.591301 2.651859  
C -0.624817 1.100592 3.930970  
H 0.139411 1.097771 1.930185  
C -1.598778 1.594389 4.800911  
H -3.311763 2.878491 5.011198  
H 0.118814 0.403754 4.293385  
H -1.607891 1.280954 5.836745  
N 0.299966 2.625239 -0.726757  
N -1.556634 1.628602 -0.225953  
H -1.207608 -1.028798 -0.096923  
H -4.200156 2.066715 -0.269352  
C -2.921129 -3.105261 0.207491  
C -2.956265 -4.011231 -0.888889  
C -2.576297 -3.568630 1.507957  
C -2.605621 -5.355760 -0.668097  
C -2.216560 -4.918712 1.672796  
C -2.227749 -5.797785 0.595216  
H -2.620241 -6.071492 -1.479341  
H -1.933780 -5.300999 2.644666  
H -1.952649 -6.834190 0.742880  
C -6.350445 0.462817 -0.032791  
C -6.959168 0.777316 1.213539  
C -7.129750 0.476295 -1.219802  
C -8.334326 1.089041 1.236660  
C -8.494019 0.802723 -1.118555  
C -9.066710 1.102768 0.116449  
H -8.826745 1.318716 2.172639  
H -9.125571 0.817675 -1.997095  
H -10.120793 1.345044 0.168753  
C -6.539721 0.132442 -2.586861  
H -5.451975 -0.071464 -2.512681  
C -6.682317 1.304970 -3.565087  
H -6.226709 2.219788 -3.128989  
H -6.153609 1.073556 -4.514457  
H -7.748019 1.509721 -3.799520  
C -7.175823 -1.142043 -3.153697  
H -7.059969 -1.976804 -2.429637  
H -8.256431 -0.993984 -3.362222

|    |           |           |           |
|----|-----------|-----------|-----------|
| H  | -6.669750 | -1.432064 | -4.099307 |
| C  | -6.175624 | 0.761430  | 2.526876  |
| H  | -5.100793 | 0.551592  | 2.350995  |
| C  | -6.680422 | -0.351481 | 3.452027  |
| H  | -6.044875 | -0.407808 | 4.361733  |
| H  | -7.730390 | -0.169299 | 3.764340  |
| H  | -6.623915 | -1.331167 | 2.930593  |
| C  | -6.226884 | 2.126391  | 3.224405  |
| H  | -5.574022 | 2.117371  | 4.122354  |
| H  | -5.861488 | 2.917867  | 2.535768  |
| H  | -7.257593 | 2.378865  | 3.549642  |
| C  | -2.604573 | -2.651354 | 2.732256  |
| H  | -2.937177 | -1.628080 | 2.464270  |
| C  | -3.368959 | -3.572279 | -2.293863 |
| H  | -3.578935 | -2.483939 | -2.328396 |
| C  | -2.243905 | -3.814376 | -3.305920 |
| H  | -1.317502 | -3.316128 | -2.957264 |
| H  | -2.041681 | -4.897596 | -3.439850 |
| H  | -2.519414 | -3.383690 | -4.292264 |
| C  | -4.662195 | -4.271010 | -2.728763 |
| H  | -4.513572 | -5.366978 | -2.828273 |
| H  | -5.463370 | -4.082883 | -1.982270 |
| H  | -5.000754 | -3.869825 | -3.708018 |
| C  | -1.206767 | -2.497414 | 3.337307  |
| H  | -0.814209 | -3.471215 | 3.697303  |
| H  | -0.513352 | -2.083298 | 2.574880  |
| H  | -1.238086 | -1.794972 | 4.196599  |
| C  | -3.608670 | -3.151891 | 3.777775  |
| H  | -4.611350 | -3.269905 | 3.313678  |
| H  | -3.293068 | -4.125296 | 4.208476  |
| H  | -3.695903 | -2.414160 | 4.604136  |
| C  | 1.597782  | -0.785381 | -3.349702 |
| C  | 0.792772  | -1.081968 | -4.605770 |
| H  | -0.089511 | -1.705570 | -4.393056 |
| B  | 1.938783  | -1.927650 | -2.420741 |
| O  | 1.195989  | -3.110073 | -2.326305 |
| O  | 3.028321  | -1.983612 | -1.525796 |
| C  | 1.660613  | -3.819274 | -1.169998 |
| C  | 3.142277  | -3.354654 | -1.103942 |
| C  | 0.863701  | -3.328632 | 0.029394  |
| H  | -0.202769 | -3.438051 | -0.193103 |
| H  | 1.079671  | -3.906347 | 0.939008  |
| H  | 1.056399  | -2.264003 | 0.229628  |
| C  | 1.455502  | -5.303489 | -1.378900 |
| H  | 1.901851  | -5.886549 | -0.559787 |
| H  | 0.382054  | -5.536832 | -1.407118 |
| H  | 1.892378  | -5.644524 | -2.325723 |
| C  | 4.017692  | -4.089019 | -2.109321 |
| H  | 4.204532  | -5.130522 | -1.811324 |
| H  | 3.561406  | -4.092278 | -3.108852 |
| H  | 4.987332  | -3.582048 | -2.183903 |
| C  | 3.764619  | -3.413761 | 0.271544  |
| H  | 3.220842  | -2.794486 | 0.992696  |
| H  | 3.779329  | -4.443999 | 0.656766  |
| H  | 4.810803  | -3.070624 | 0.237980  |
| Na | 4.545143  | -0.385804 | 0.689997  |
| H  | 1.366369  | -1.630348 | -5.379736 |
| H  | 2.461863  | -0.128799 | -3.554502 |
| H  | 0.409210  | -0.175208 | -5.105285 |
| O  | 6.614195  | -0.005058 | 1.997001  |
| O  | 3.877736  | -1.258088 | 2.852411  |
| C  | 6.363152  | 0.750549  | 3.141043  |
| H  | 5.281433  | 0.990811  | 3.209224  |
| H  | 6.645672  | 0.150155  | 4.032202  |
| C  | 7.601127  | 0.647069  | 1.264732  |
| H  | 8.355261  | -0.089130 | 0.915324  |
| H  | 7.137200  | 1.131490  | 0.379045  |
| C  | 8.258562  | 1.698891  | 2.128709  |
| H  | 9.138682  | 1.265784  | 2.654066  |
| H  | 8.565860  | 2.589503  | 1.538425  |
| C  | 7.183835  | 2.023896  | 3.111152  |
| H  | 6.566276  | 2.869484  | 2.735640  |
| H  | 7.600256  | 2.274249  | 4.111184  |
| C  | 2.584117  | -1.257927 | 3.355321  |
| H  | 2.499965  | -0.482027 | 4.147796  |
| H  | 1.867230  | -1.013847 | 2.544283  |
| C  | 4.589553  | -2.192593 | 3.592044  |
| H  | 5.393372  | -2.631285 | 2.963428  |
| H  | 5.057798  | -1.690744 | 4.467158  |
| C  | 3.635250  | -3.270937 | 4.062135  |
| H  | 3.709870  | -4.167191 | 3.407227  |
| H  | 3.844701  | -3.559293 | 5.115391  |
| C  | 2.282699  | -2.631589 | 3.924839  |
| H  | 1.655724  | -3.217846 | 3.220326  |
| H  | 1.767079  | -2.551097 | 4.906716  |
| O  | 5.972090  | -0.574818 | -1.221652 |
| C  | 7.003418  | -1.375619 | -1.699761 |
| H  | 7.979686  | -0.927383 | -1.415592 |



H 6.932415 -2.378704 -1.228801  
 C 5.457510 0.119242 -2.307546  
 H 5.988385 1.092259 -2.403400  
 H 4.379354 0.321506 -2.150219  
 C 6.902919 -1.494091 -3.213513  
 H 7.794620 -1.035954 -3.695835  
 H 6.809283 -2.553241 -3.538160  
 C 5.670247 -0.711202 -3.549860  
 H 5.812070 -0.074463 -4.449966  
 H 4.809451 -1.398109 -3.702885

178

Figure\_S6\_imid-3\_modeS2\_ed(CuHadd) / electronic energy: -3602.007096538227 a.u. / lowest freq: 14.86 cm<sup>-1</sup>

C 1.094457 1.544452 2.251053  
 H 1.994340 1.052576 2.644628  
 C -0.171068 0.653426 2.325904  
 H -1.019816 1.172764 2.800708  
 C 0.334091 1.087360 0.050297  
 C 2.243261 2.546015 0.167341  
 C 1.799615 3.476116 -0.783774  
 C 3.626217 2.434138 0.410214  
 C 2.689097 4.302393 -1.460306  
 H 0.727019 3.548841 -0.983219  
 C 4.508077 3.290159 -0.256080  
 C 4.051373 4.227291 -1.178751  
 H 2.308679 5.008445 -2.202404  
 H 5.576230 3.169999 -0.068098  
 H 4.762075 4.878083 -1.692449  
 C -1.528477 -0.383332 0.451118  
 C -2.831425 -0.184256 0.925675  
 C -1.259437 -1.467012 -0.397700  
 C -3.855678 -1.066432 0.560475  
 C -2.277227 -2.366661 -0.739877  
 C -3.576379 -2.160550 -0.265244  
 H -4.364591 -2.858436 -0.523975  
 S 4.366399 1.117803 1.400473  
 O 5.777116 1.033772 0.924702  
 O 3.605803 -0.101681 1.001098  
 O 4.239520 1.493001 2.819907  
 Cu 0.234916 1.213274 -1.919588  
 C 0.903631 2.870167 2.948067  
 C 1.712542 3.225628 4.041890  
 C -0.095353 3.764132 2.520951  
 C 1.543936 4.460834 4.674696  
 H 2.466620 2.546261 4.414884  
 C -0.259120 4.999094 3.155197  
 H -0.750217 3.497163 1.701749  
 C 0.562615 5.348857 4.228585  
 H 2.172789 4.728250 5.514015  
 H -1.024477 5.685048 2.817768  
 H 0.433870 6.304721 4.719640  
 C 0.062012 -0.651367 3.047074  
 C -0.647986 -0.948796 4.223683  
 C 0.973575 -1.599306 2.542363  
 C -0.436126 -2.167267 4.873000  
 H -1.359087 -0.244245 4.635856  
 C 1.183455 -2.764840 3.175916  
 H 1.509983 -1.394844 1.628517  
 C 0.485438 -3.076547 4.348132  
 H -0.980269 -2.404269 5.777949  
 H 1.894873 -3.474001 2.772982  
 H 0.657569 -4.022084 4.845664  
 N 1.259199 1.735811 0.785508  
 N -0.473732 0.442385 0.899790  
 H -0.250633 -1.638041 -0.743853  
 H -3.048401 0.649410 1.582168  
 C -1.974959 -3.574193 -1.532741  
 C -2.187262 -3.575594 -2.939680  
 C -1.549309 -4.763243 -0.874400  
 C -1.982319 -4.769302 -3.656050  
 C -1.359253 -5.930191 -1.637258  
 C -1.569477 -5.928773 -3.010844  
 H -2.155297 -4.812220 -4.723027  
 H -1.059451 -6.857209 -1.167279  
 H -1.422356 -6.838252 -3.579170  
 C -5.223624 -0.863132 1.068714  
 C -5.576656 -1.334797 2.363805  
 C -6.192002 -0.212339 0.254789  
 C -6.892711 -1.137728 2.820664  
 C -7.494642 -0.040587 0.757160  
 C -7.837245 -0.497200 2.025461  
 H -7.196168 -1.485810 3.799214  
 H -8.255377 0.449963 0.164231  
 H -8.845175 -0.356327 2.394278  
 C -5.861271 0.305531 -1.145652  
 H -4.800515 0.114315 -1.405545  
 C -6.045089 1.824303 -1.232029  
 H -5.451336 2.322048 -0.435878  
 H -5.685612 2.193044 -2.216646

|    |           |           |           |
|----|-----------|-----------|-----------|
| H  | -7.111466 | 2.111019  | -1.117219 |
| C  | -6.696131 | -0.413729 | -2.211572 |
| H  | -6.562333 | -1.512629 | -2.119345 |
| H  | -7.775341 | -0.173882 | -2.108425 |
| H  | -6.362522 | -0.107445 | -3.226153 |
| C  | -4.577566 | -2.061811 | 3.266048  |
| H  | -3.583250 | -2.145622 | 2.782138  |
| C  | -5.029635 | -3.500197 | 3.544370  |
| H  | -4.242382 | -4.042994 | 4.110320  |
| H  | -5.967686 | -3.520939 | 4.138039  |
| H  | -5.197706 | -4.036272 | 2.585779  |
| C  | -4.349299 | -1.291429 | 4.572014  |
| H  | -3.559741 | -1.789273 | 5.173990  |
| H  | -4.013859 | -0.256394 | 4.346700  |
| H  | -5.275626 | -1.245200 | 5.182072  |
| C  | -1.332817 | -4.825062 | 0.638499  |
| H  | -1.435512 | -3.822341 | 1.100952  |
| C  | -2.663075 | -2.333516 | -3.691488 |
| H  | -2.706170 | -1.452220 | -3.019216 |
| C  | -1.695133 | -1.955478 | -4.820334 |
| H  | -0.673764 | -1.806540 | -4.409715 |
| H  | -1.656123 | -2.738078 | -5.605993 |
| H  | -2.024495 | -1.009475 | -5.299701 |
| C  | -4.082847 | -2.537610 | -4.231313 |
| H  | -4.108153 | -3.338750 | -5.000067 |
| H  | -4.766754 | -2.815358 | -3.401245 |
| H  | -4.456169 | -1.595939 | -4.687642 |
| C  | 0.083235  | -5.302943 | 0.986408  |
| H  | 0.257943  | -6.346285 | 0.652049  |
| H  | 0.835672  | -4.640894 | 0.508692  |
| H  | 0.233522  | -5.269840 | 2.085801  |
| C  | -2.391070 | -5.713074 | 1.301933  |
| H  | -3.407797 | -5.344771 | 1.046384  |
| H  | -2.295677 | -6.767942 | 0.967911  |
| H  | -2.279233 | -5.678669 | 2.406920  |
| C  | -1.632197 | 1.881375  | -2.488742 |
| C  | -0.772312 | 1.660401  | -3.581676 |
| H  | -0.283156 | 2.509989  | -4.072176 |
| B  | -1.940247 | 3.285352  | -1.951262 |
| O  | -1.342470 | 4.429969  | -2.439981 |
| O  | -2.895038 | 3.562201  | -0.998672 |
| C  | -1.851835 | 5.560502  | -1.692905 |
| C  | -3.165615 | 4.981736  | -1.055891 |
| C  | -0.806743 | 5.940955  | -0.659669 |
| H  | 0.139685  | 6.184707  | -1.161035 |
| H  | -1.112037 | 6.817694  | -0.072257 |
| H  | -0.608808 | 5.117599  | 0.036048  |
| C  | -2.073053 | 6.713818  | -2.649084 |
| H  | -2.536659 | 7.566575  | -2.132459 |
| H  | -1.111619 | 7.054642  | -3.056292 |
| H  | -2.713421 | 6.433487  | -3.493923 |
| C  | -4.379602 | 5.171329  | -1.951660 |
| H  | -4.660870 | 6.229671  | -2.036064 |
| H  | -4.200086 | 4.782001  | -2.963421 |
| H  | -5.237314 | 4.632357  | -1.530383 |
| C  | -3.463610 | 5.477432  | 0.341722  |
| H  | -2.659282 | 5.228233  | 1.042289  |
| H  | -3.605066 | 6.567631  | 0.351868  |
| H  | -4.387544 | 5.016221  | 0.715800  |
| Na | 5.328346  | -0.961924 | -0.419410 |
| H  | -0.837325 | 0.761391  | -4.197406 |
| H  | -2.306474 | 1.064464  | -2.197011 |
| H  | 1.508520  | 0.619018  | -2.644656 |
| O  | 3.859486  | -2.441338 | -1.374748 |
| O  | 6.060873  | -2.511812 | 1.182938  |
| C  | 4.106003  | -3.497118 | -2.245381 |
| H  | 4.672347  | -3.113036 | -3.120440 |
| H  | 4.726923  | -4.263339 | -1.733948 |
| C  | 2.483585  | -2.280697 | -1.264629 |
| H  | 2.152744  | -2.687980 | -0.286379 |
| H  | 2.226276  | -1.202743 | -1.302146 |
| C  | 1.801673  | -3.034005 | -2.384359 |
| H  | 0.830126  | -3.463938 | -2.064749 |
| H  | 1.651621  | -2.368084 | -3.261868 |
| C  | 2.794330  | -4.100911 | -2.707962 |
| H  | 2.568854  | -5.020112 | -2.122370 |
| H  | 2.805251  | -4.336859 | -3.794337 |
| C  | 6.967289  | -2.063296 | 2.134080  |
| H  | 7.726265  | -2.855720 | 2.318773  |
| H  | 7.489380  | -1.159924 | 1.753927  |
| C  | 5.012540  | -3.096936 | 1.881388  |
| H  | 4.069130  | -2.976013 | 1.311417  |
| H  | 5.212558  | -4.185010 | 1.999475  |
| C  | 4.895893  | -2.432598 | 3.239404  |
| H  | 4.720117  | -3.186453 | 4.037650  |
| H  | 4.068405  | -1.690219 | 3.242611  |
| C  | 6.219386  | -1.742928 | 3.414300  |
| H  | 6.076146  | -0.645260 | 3.518104  |

|   |          |           |           |
|---|----------|-----------|-----------|
| H | 6.765023 | -2.132096 | 4.301597  |
| O | 5.695672 | 0.248443  | -2.383048 |
| C | 6.325006 | -0.318411 | -3.486301 |
| H | 7.232727 | 0.272321  | -3.736388 |
| H | 6.641821 | -1.351379 | -3.227711 |
| C | 4.527074 | 0.846821  | -2.832366 |
| H | 3.750051 | 0.772465  | -2.045951 |
| H | 4.721974 | 1.921877  | -3.041011 |
| C | 5.369757 | -0.348357 | -4.668716 |
| H | 5.722865 | 0.342106  | -5.466329 |
| H | 5.261033 | -1.374360 | -5.083645 |
| C | 4.079773 | 0.144077  | -4.091157 |
| H | 3.548174 | 0.834133  | -4.781844 |
| H | 3.425719 | -0.716430 | -3.834231 |

178

Figure\_S6\_imid-3\_modeS2\_ts(CuHadd)\_01 / electronic energy: -3601.991628510991 a.u. / lowest freq: -696.99 cm<sup>-1</sup>

|    |           |           |           |
|----|-----------|-----------|-----------|
| C  | 0.547330  | 1.416976  | 2.779529  |
| H  | 1.380129  | 0.959508  | 3.331505  |
| C  | -0.687667 | 0.485916  | 2.653824  |
| H  | -1.605669 | 0.964068  | 3.032657  |
| C  | 0.147664  | 0.957924  | 0.485233  |
| C  | 1.967934  | 2.472472  | 0.912490  |
| C  | 1.624098  | 3.392085  | -0.088579 |
| C  | 3.292618  | 2.450897  | 1.385565  |
| C  | 2.548283  | 4.303007  | -0.585776 |
| H  | 0.598266  | 3.401336  | -0.466613 |
| C  | 4.201485  | 3.402684  | 0.912055  |
| C  | 3.837806  | 4.332901  | -0.057695 |
| H  | 2.240586  | 4.996582  | -1.372833 |
| H  | 5.222599  | 3.368483  | 1.295924  |
| H  | 4.568360  | 5.062062  | -0.414509 |
| C  | -1.777692 | -0.480473 | 0.578283  |
| C  | -3.132539 | -0.278881 | 0.870123  |
| C  | -1.402791 | -1.525939 | -0.276306 |
| C  | -4.104257 | -1.118326 | 0.312440  |
| C  | -2.370716 | -2.384015 | -0.811156 |
| C  | -3.722984 | -2.174943 | -0.521780 |
| H  | -4.474381 | -2.839669 | -0.932492 |
| S  | 3.949186  | 1.129562  | 2.421872  |
| O  | 5.414965  | 1.130091  | 2.144436  |
| O  | 3.316043  | -0.110381 | 1.883340  |
| O  | 3.601205  | 1.433639  | 3.821604  |
| Cu | 0.365948  | 1.136810  | -1.403903 |
| C  | 0.201793  | 2.748139  | 3.405049  |
| C  | 0.826555  | 3.166066  | 4.593085  |
| C  | -0.747338 | 3.593076  | 2.800956  |
| C  | 0.521414  | 4.411269  | 5.151694  |
| H  | 1.545374  | 2.530266  | 5.091958  |
| C  | -1.047806 | 4.837531  | 3.360246  |
| H  | -1.256621 | 3.280852  | 1.900083  |
| C  | -0.411624 | 5.247886  | 4.533876  |
| H  | 1.008470  | 4.727464  | 6.065056  |
| H  | -1.775539 | 5.482244  | 2.884450  |
| H  | -0.645320 | 6.211580  | 4.967510  |
| C  | -0.515171 | -0.843614 | 3.346620  |
| C  | -1.394935 | -1.227657 | 4.374411  |
| C  | 0.492579  | -1.740822 | 2.940077  |
| C  | -1.254746 | -2.480242 | 4.976230  |
| H  | -2.187054 | -0.566942 | 4.703252  |
| C  | 0.629517  | -2.941274 | 3.527199  |
| H  | 1.160990  | -1.471733 | 2.135982  |
| C  | -0.237455 | -3.338558 | 4.551852  |
| H  | -1.930771 | -2.784465 | 5.764718  |
| H  | 1.412071  | -3.613175 | 3.198339  |
| H  | -0.122547 | -4.311514 | 5.011657  |
| N  | 0.952136  | 1.598344  | 1.362678  |
| N  | -0.789638 | 0.316363  | 1.196458  |
| H  | -0.357502 | -1.698692 | -0.483229 |
| H  | -3.432420 | 0.527533  | 1.527993  |
| C  | -1.965990 | -3.543241 | -1.628212 |
| C  | -1.974030 | -3.451821 | -3.047673 |
| C  | -1.615954 | -4.768121 | -0.993090 |
| C  | -1.639526 | -4.590397 | -3.803224 |
| C  | -1.289346 | -5.877828 | -1.794035 |
| C  | -1.298875 | -5.786066 | -3.181204 |
| H  | -1.646923 | -4.558607 | -4.884681 |
| H  | -1.034341 | -6.828646 | -1.345293 |
| H  | -1.047136 | -6.652011 | -3.779978 |
| C  | -5.527319 | -0.908683 | 0.627516  |
| C  | -6.079738 | -1.470294 | 1.812007  |
| C  | -6.345928 | -0.155298 | -0.259017 |
| C  | -7.443727 | -1.262967 | 2.086928  |
| C  | -7.704920 | 0.020405  | 0.059144  |
| C  | -8.243760 | -0.526318 | 1.219352  |
| H  | -7.896974 | -1.676856 | 2.978067  |
| H  | -8.357146 | 0.584276  | -0.594714 |
| H  | -9.291819 | -0.379719 | 1.447104  |
| C  | -5.796317 | 0.463378  | -1.545811 |

|    |           |           |           |
|----|-----------|-----------|-----------|
| H  | -4.712441 | 0.258810  | -1.659300 |
| C  | -5.934251 | 1.990511  | -1.533148 |
| H  | -5.432583 | 2.409111  | -0.634362 |
| H  | -5.448081 | 2.421864  | -2.434095 |
| H  | -6.999897 | 2.301481  | -1.528858 |
| C  | -6.472977 | -0.142497 | -2.780929 |
| H  | -6.368426 | -1.248465 | -2.765437 |
| H  | -7.552109 | 0.116454  | -2.817099 |
| H  | -5.987820 | 0.237831  | -3.705339 |
| C  | -5.240891 | -2.299196 | 2.787084  |
| H  | -4.188619 | -2.380036 | 2.446472  |
| C  | -5.761668 | -3.738257 | 2.879893  |
| H  | -5.080900 | -4.348640 | 3.511297  |
| H  | -6.778590 | -3.771887 | 3.324323  |
| H  | -5.794961 | -4.194523 | 1.867258  |
| C  | -5.186562 | -1.639415 | 4.170066  |
| H  | -4.496724 | -2.203586 | 4.833435  |
| H  | -4.805803 | -0.599604 | 4.078210  |
| H  | -6.189145 | -1.615410 | 4.646299  |
| C  | -1.615709 | -4.926256 | 0.528517  |
| H  | -1.835274 | -3.964096 | 1.034263  |
| C  | -2.344739 | -2.161144 | -3.776413 |
| H  | -2.527261 | -1.336456 | -3.058416 |
| C  | -1.202404 | -1.687186 | -4.683376 |
| H  | -0.263753 | -1.606873 | -4.095827 |
| H  | -1.036950 | -2.386991 | -5.528904 |
| H  | -1.440307 | -0.686571 | -5.103063 |
| C  | -3.644400 | -2.333985 | -4.570111 |
| H  | -3.520909 | -3.076067 | -5.386979 |
| H  | -4.457586 | -2.675174 | -3.894340 |
| H  | -3.949597 | -1.363334 | -5.016370 |
| C  | -0.240572 | -5.366863 | 1.045799  |
| H  | 0.028758  | -6.378828 | 0.678541  |
| H  | 0.536693  | -4.645490 | 0.716842  |
| H  | -0.244836 | -5.394215 | 2.155872  |
| C  | -2.711152 | -5.900410 | 0.976136  |
| H  | -3.698953 | -5.557105 | 0.600311  |
| H  | -2.517151 | -6.925576 | 0.595852  |
| H  | -2.758059 | -5.937022 | 2.085699  |
| C  | -0.843412 | 1.765717  | -2.958508 |
| C  | 0.507825  | 1.471066  | -3.375261 |
| H  | 1.175306  | 2.322353  | -3.562520 |
| B  | -1.355087 | 3.137773  | -2.589866 |
| O  | -0.576067 | 4.292380  | -2.500960 |
| O  | -2.696627 | 3.422528  | -2.354072 |
| C  | -1.421861 | 5.355071  | -2.013503 |
| C  | -2.849736 | 4.851768  | -2.410385 |
| C  | -1.250154 | 5.436169  | -0.505781 |
| H  | -0.196404 | 5.616250  | -0.253123 |
| H  | -1.842511 | 6.250216  | -0.065585 |
| H  | -1.561189 | 4.494069  | -0.034231 |
| C  | -1.001131 | 6.654963  | -2.665447 |
| H  | -1.680983 | 7.474190  | -2.388899 |
| H  | 0.008802  | 6.936017  | -2.334756 |
| H  | -0.984315 | 6.576307  | -3.759393 |
| C  | -3.214987 | 5.216092  | -3.842041 |
| H  | -3.412724 | 6.291322  | -3.955985 |
| H  | -2.415075 | 4.937980  | -4.542927 |
| H  | -4.122051 | 4.670915  | -4.136322 |
| C  | -3.952652 | 5.273301  | -1.462181 |
| H  | -3.804705 | 4.861760  | -0.456448 |
| H  | -4.008443 | 6.368866  | -1.383475 |
| H  | -4.925489 | 4.918147  | -1.827871 |
| Na | 5.214051  | -0.873829 | 0.692601  |
| H  | 0.680045  | 0.665920  | -4.095437 |
| H  | -1.588983 | 0.976060  | -3.112512 |
| H  | 1.576710  | 0.706547  | -2.345696 |
| O  | 3.810776  | -2.295950 | -0.545110 |
| O  | 6.974340  | -2.247430 | 0.119461  |
| C  | 2.436466  | -2.123658 | -0.666258 |
| H  | 1.935221  | -2.676925 | 0.155659  |
| H  | 2.182514  | -1.047357 | -0.575026 |
| C  | 4.241073  | -3.115073 | -1.583115 |
| H  | 4.886905  | -2.520530 | -2.264418 |
| H  | 4.840872  | -3.954414 | -1.172375 |
| C  | 3.044694  | -3.646443 | -2.344248 |
| H  | 3.233235  | -3.688752 | -3.439041 |
| H  | 2.768798  | -4.656135 | -1.966084 |
| C  | 1.974572  | -2.664082 | -2.002844 |
| H  | 1.950029  | -1.847375 | -2.757510 |
| H  | 0.978399  | -3.151378 | -1.936481 |
| C  | 7.306951  | -3.419024 | 0.785065  |
| H  | 8.067491  | -3.194582 | 1.565459  |
| H  | 6.402986  | -3.830428 | 1.282532  |
| C  | 7.797440  | -2.176126 | -0.994823 |
| H  | 7.283243  | -1.622425 | -1.807837 |
| H  | 8.729569  | -1.629130 | -0.729740 |
| C  | 8.121055  | -3.585968 | -1.443845 |

|   |          |           |           |
|---|----------|-----------|-----------|
| H | 9.178977 | -3.668824 | -1.775779 |
| H | 7.443044 | -3.891811 | -2.271224 |
| C | 7.857100 | -4.416350 | -0.218756 |
| H | 7.107860 | -5.208874 | -0.437729 |
| H | 8.792635 | -4.882946 | 0.160412  |
| O | 5.540033 | 0.392031  | -1.281097 |
| C | 4.358640 | 0.790153  | -1.889751 |
| H | 3.900684 | -0.077713 | -2.407950 |
| H | 3.652644 | 1.153694  | -1.114478 |
| C | 6.412860 | 1.470784  | -1.329407 |
| H | 6.410006 | 1.990650  | -0.348989 |
| H | 7.442250 | 1.098471  | -1.517979 |
| C | 4.659272 | 1.888671  | -2.884986 |
| H | 4.739348 | 1.465581  | -3.910730 |
| H | 3.873248 | 2.674973  | -2.865613 |
| C | 5.988879 | 2.420334  | -2.435882 |
| H | 6.720744 | 2.405241  | -3.273352 |
| H | 5.893512 | 3.457817  | -2.048272 |

178

Figure\_S6\_imid-3\_modeS2\_ts(CuHadd)\_02 / electronic energy: -3601.993675027721 a.u. / lowest freq: -684.78 cm-1

|    |           |           |           |
|----|-----------|-----------|-----------|
| C  | 1.217977  | 1.000264  | 2.594864  |
| H  | 2.096436  | 0.395219  | 2.856368  |
| C  | -0.093021 | 0.173890  | 2.543252  |
| H  | -0.903074 | 0.646953  | 3.123104  |
| C  | 0.394882  | 0.980848  | 0.369470  |
| C  | 2.342932  | 2.350064  | 0.700694  |
| C  | 1.897804  | 3.443930  | -0.055065 |
| C  | 3.727616  | 2.169899  | 0.877561  |
| C  | 2.791270  | 4.359492  | -0.599946 |
| H  | 0.823219  | 3.577385  | -0.206612 |
| C  | 4.615791  | 3.113908  | 0.352652  |
| C  | 4.158476  | 4.210000  | -0.374012 |
| H  | 2.407927  | 5.194127  | -1.192562 |
| H  | 5.685338  | 2.941595  | 0.486168  |
| H  | 4.871812  | 4.928980  | -0.782428 |
| C  | -1.539799 | -0.438783 | 0.548807  |
| C  | -2.813284 | -0.294997 | 1.115951  |
| C  | -1.360836 | -1.311936 | -0.533291 |
| C  | -3.896503 | -1.021422 | 0.606319  |
| C  | -2.436494 | -2.063229 | -1.021989 |
| C  | -3.706085 | -1.911001 | -0.456425 |
| H  | -4.539932 | -2.493112 | -0.832015 |
| S  | 4.433199  | 0.670154  | 1.580313  |
| O  | 5.818778  | 0.604349  | 1.029511  |
| O  | 3.590717  | -0.419186 | 1.004418  |
| O  | 4.378858  | 0.788724  | 3.047626  |
| Cu | 0.293244  | 1.485735  | -1.469814 |
| C  | 1.118247  | 2.174275  | 3.538459  |
| C  | 1.937026  | 2.248096  | 4.678794  |
| C  | 0.196086  | 3.207798  | 3.294115  |
| C  | 1.849808  | 3.345158  | 5.541592  |
| H  | 2.636563  | 1.455556  | 4.907997  |
| C  | 0.113036  | 4.303742  | 4.156583  |
| H  | -0.459346 | 3.157771  | 2.437035  |
| C  | 0.941803  | 4.374025  | 5.278615  |
| H  | 2.485185  | 3.396252  | 6.416310  |
| H  | -0.595974 | 5.096636  | 3.955989  |
| H  | 0.876238  | 5.222294  | 5.947568  |
| C  | 0.078780  | -1.248470 | 3.017628  |
| C  | -0.626230 | -1.711691 | 4.142543  |
| C  | 0.913852  | -2.143802 | 2.319253  |
| C  | -0.484913 | -3.039821 | 4.551755  |
| H  | -1.281801 | -1.052301 | 4.697128  |
| C  | 1.049602  | -3.419257 | 2.718581  |
| H  | 1.448995  | -1.809299 | 1.442759  |
| C  | 0.356398  | -3.895612 | 3.836819  |
| H  | -1.024034 | -3.403923 | 5.416552  |
| H  | 1.698565  | -4.087930 | 2.168221  |
| H  | 0.470753  | -4.926377 | 4.146137  |
| N  | 1.357254  | 1.460073  | 1.189773  |
| N  | -0.427000 | 0.225540  | 1.111697  |
| H  | -0.376849 | -1.442101 | -0.958459 |
| H  | -2.964408 | 0.378293  | 1.950543  |
| C  | -2.223166 | -3.065099 | -2.083212 |
| C  | -2.455546 | -2.723182 | -3.444173 |
| C  | -1.823288 | -4.386875 | -1.737121 |
| C  | -2.291211 | -3.712841 | -4.430520 |
| C  | -1.672252 | -5.339693 | -2.761330 |
| C  | -1.901415 | -5.003110 | -4.090475 |
| H  | -2.469805 | -3.489239 | -5.473940 |
| H  | -1.382651 | -6.356793 | -2.533098 |
| H  | -1.781765 | -5.751019 | -4.863819 |
| C  | -5.234468 | -0.870860 | 1.203496  |
| C  | -5.590474 | -1.638507 | 2.347079  |
| C  | -6.175351 | 0.020349  | 0.616705  |
| C  | -6.884698 | -1.498013 | 2.880544  |
| C  | -7.457300 | 0.123305  | 1.186807  |
| C  | -7.804122 | -0.626684 | 2.305766  |

|    |           |           |           |
|----|-----------|-----------|-----------|
| H  | -7.191022 | -2.070539 | 3.746107  |
| H  | -8.199445 | 0.786508  | 0.762285  |
| H  | -8.796023 | -0.534476 | 2.729356  |
| C  | -5.839888 | 0.860204  | -0.617150 |
| H  | -4.792516 | 0.696543  | -0.942842 |
| C  | -5.953863 | 2.359896  | -0.318981 |
| H  | -5.300905 | 2.626276  | 0.539718  |
| H  | -5.622380 | 2.946281  | -1.202085 |
| H  | -6.998957 | 2.648734  | -0.081188 |
| C  | -6.721266 | 0.464748  | -1.807598 |
| H  | -6.628539 | -0.625308 | -2.001405 |
| H  | -7.788026 | 0.706901  | -1.616958 |
| H  | -6.393690 | 1.007197  | -2.720302 |
| C  | -4.618123 | -2.621213 | 3.002551  |
| H  | -3.635082 | -2.619513 | 2.489139  |
| C  | -5.139425 | -4.059752 | 2.906281  |
| H  | -4.376465 | -4.767387 | 3.295931  |
| H  | -6.073422 | -4.190453 | 3.492324  |
| H  | -5.340399 | -4.318960 | 1.844635  |
| C  | -4.333682 | -2.231832 | 4.458176  |
| H  | -3.559460 | -2.902981 | 4.886492  |
| H  | -3.952889 | -1.189033 | 4.503228  |
| H  | -5.246963 | -2.309591 | 5.084415  |
| C  | -1.576491 | -4.810919 | -0.288292 |
| H  | -1.685621 | -3.953994 | 0.407124  |
| C  | -2.863963 | -1.319303 | -3.867432 |
| H  | -2.924452 | -0.635263 | -2.996032 |
| C  | -1.874904 | -0.703200 | -4.844455 |
| H  | -0.857037 | -0.730458 | -4.401125 |
| H  | -1.859431 | -1.248370 | -5.811165 |
| H  | -2.140700 | 0.355760  | -5.048669 |
| C  | -4.294904 | -1.333130 | -4.466020 |
| H  | -4.325267 | -1.915229 | -5.411206 |
| H  | -5.008024 | -1.783732 | -3.742974 |
| H  | -4.627872 | -0.294735 | -4.678940 |
| C  | -0.146240 | -5.329960 | -0.093142 |
| H  | 0.039524  | -6.248761 | -0.687043 |
| H  | 0.584424  | -4.551001 | -0.396688 |
| H  | 0.025502  | -5.572113 | 0.976770  |
| C  | -2.607308 | -5.853531 | 0.158873  |
| H  | -3.634743 | -5.456393 | 0.012587  |
| H  | -2.500287 | -6.797292 | -0.416451 |
| H  | -2.475650 | -6.080323 | 1.238636  |
| C  | -1.128355 | 2.379072  | -2.676672 |
| C  | 0.135364  | 2.169845  | -3.346204 |
| H  | 0.786159  | 3.043388  | -3.482052 |
| B  | -1.548181 | 3.655491  | -1.988572 |
| O  | -0.734309 | 4.772484  | -1.785335 |
| O  | -2.839432 | 3.891582  | -1.523312 |
| C  | -1.476342 | 5.705210  | -0.972321 |
| C  | -2.954396 | 5.305719  | -1.282362 |
| C  | -1.119414 | 5.443530  | 0.481774  |
| H  | -0.036161 | 5.548727  | 0.631210  |
| H  | -1.619664 | 6.144789  | 1.164140  |
| H  | -1.410915 | 4.422901  | 0.766992  |
| C  | -1.101249 | 7.116381  | -1.369029 |
| H  | -1.722095 | 7.852721  | -0.837794 |
| H  | -0.052451 | 7.318186  | -1.110115 |
| H  | -1.216150 | 7.282004  | -2.447534 |
| C  | -3.469337 | 5.946358  | -2.563065 |
| H  | -3.657149 | 7.022440  | -2.440194 |
| H  | -2.756527 | 5.813655  | -3.389381 |
| H  | -4.414408 | 5.468386  | -2.854466 |
| C  | -3.923901 | 5.546248  | -0.144693 |
| H  | -3.683116 | 4.934246  | 0.733012  |
| H  | -3.919657 | 6.603564  | 0.158280  |
| H  | -4.947552 | 5.296654  | -0.454538 |
| Na | 5.233997  | -1.055366 | -0.593591 |
| H  | 0.172940  | 1.508575  | -4.217005 |
| H  | -1.908487 | 1.629219  | -2.855264 |
| H  | 1.337086  | 1.244324  | -2.650169 |
| O  | 3.662555  | -2.254077 | -1.852276 |
| O  | 5.788913  | -2.990874 | 0.628866  |
| C  | 2.303905  | -1.987129 | -1.728627 |
| H  | 1.923707  | -2.489571 | -0.815021 |
| H  | 2.142147  | -0.894740 | -1.622897 |
| C  | 3.837477  | -3.149866 | -2.900877 |
| H  | 4.408050  | -2.645422 | -3.709854 |
| H  | 4.424119  | -4.025163 | -2.549118 |
| C  | 2.487658  | -3.594165 | -3.426288 |
| H  | 2.478737  | -3.675773 | -4.534977 |
| H  | 2.201863  | -4.568640 | -2.970799 |
| C  | 1.573802  | -2.518108 | -2.942783 |
| H  | 1.475428  | -1.721494 | -3.712143 |
| H  | 0.572397  | -2.919613 | -2.685055 |
| C  | 6.754671  | -2.857063 | 1.616144  |
| H  | 7.386602  | -3.772798 | 1.638158  |
| H  | 7.404583  | -1.985907 | 1.387178  |

|   |          |           |           |
|---|----------|-----------|-----------|
| C | 4.677756 | -3.562401 | 1.236943  |
| H | 3.753389 | -3.185938 | 0.753431  |
| H | 4.714784 | -4.666254 | 1.104332  |
| C | 4.681808 | -3.207926 | 2.713221  |
| H | 4.491445 | -4.109385 | 3.335880  |
| H | 3.914971 | -2.434951 | 2.937588  |
| C | 6.062121 | -2.664064 | 2.949296  |
| H | 6.013352 | -1.583097 | 3.205047  |
| H | 6.587425 | -3.216609 | 3.758602  |
| O | 5.517625 | 0.529032  | -2.357926 |
| C | 6.104822 | 0.157189  | -3.562583 |
| H | 7.036060 | 0.744848  | -3.714801 |
| H | 6.375715 | -0.919199 | -3.513887 |
| C | 4.403337 | 1.297934  | -2.662649 |
| H | 3.623885 | 1.148635  | -1.888513 |
| H | 4.691061 | 2.372340  | -2.674762 |
| C | 5.132566 | 0.398552  | -4.706778 |
| H | 5.527223 | 1.183500  | -5.389187 |
| H | 4.937232 | -0.532880 | -5.282178 |
| C | 3.892280 | 0.881584  | -4.020802 |
| H | 3.417899 | 1.730001  | -4.560333 |
| H | 3.168215 | 0.045970  | -3.914925 |

178

Figure\_S6\_imid-3\_modeS2\_ts(CuHadd)\_03 / electronic energy: -3601.992228363180 a.u. / lowest freq: -639.86 cm-1

|    |           |           |           |
|----|-----------|-----------|-----------|
| C  | 1.110058  | 1.075844  | 2.667306  |
| H  | 2.014056  | 0.520509  | 2.952804  |
| C  | -0.149002 | 0.175498  | 2.571052  |
| H  | -0.994817 | 0.582940  | 3.149220  |
| C  | 0.342857  | 1.046613  | 0.422329  |
| C  | 2.223898  | 2.491087  | 0.820544  |
| C  | 1.753421  | 3.582915  | 0.077862  |
| C  | 3.609101  | 2.361132  | 1.031976  |
| C  | 2.622426  | 4.549095  | -0.416303 |
| H  | 0.678840  | 3.676229  | -0.100194 |
| C  | 4.470900  | 3.355263  | 0.558424  |
| C  | 3.987558  | 4.451362  | -0.151603 |
| H  | 2.220814  | 5.382715  | -0.998417 |
| H  | 5.542806  | 3.222438  | 0.716339  |
| H  | 4.681042  | 5.210607  | -0.519377 |
| C  | -1.522428 | -0.471156 | 0.536270  |
| C  | -2.811973 | -0.412897 | 1.081308  |
| C  | -1.273026 | -1.310919 | -0.558761 |
| C  | -3.841333 | -1.190852 | 0.538013  |
| C  | -2.294192 | -2.113920 | -1.081389 |
| C  | -3.580372 | -2.047044 | -0.536957 |
| H  | -4.372341 | -2.668217 | -0.939634 |
| S  | 4.358500  | 0.868975  | 1.707073  |
| O  | 5.758701  | 0.880897  | 1.192297  |
| O  | 3.579355  | -0.239163 | 1.079657  |
| O  | 4.264330  | 0.933127  | 3.176570  |
| Cu | 0.275327  | 1.577126  | -1.411062 |
| C  | 0.915668  | 2.238210  | 3.611039  |
| C  | 1.721283  | 2.375155  | 4.755027  |
| C  | -0.077420 | 3.201761  | 3.358122  |
| C  | 1.548651  | 3.464614  | 5.614617  |
| H  | 2.477924  | 1.638440  | 4.988752  |
| C  | -0.245645 | 4.290367  | 4.217459  |
| H  | -0.722370 | 3.102453  | 2.497155  |
| C  | 0.568934  | 4.423345  | 5.344157  |
| H  | 2.174097  | 3.564566  | 6.492269  |
| H  | -1.009350 | 5.029010  | 4.010647  |
| H  | 0.437517  | 5.265959  | 6.010556  |
| C  | 0.099896  | -1.246119 | 3.012053  |
| C  | -0.588976 | -1.778111 | 4.116521  |
| C  | 0.993703  | -2.072947 | 2.302320  |
| C  | -0.373216 | -3.105224 | 4.495482  |
| H  | -1.288680 | -1.172694 | 4.678709  |
| C  | 1.201176  | -3.346929 | 2.672926  |
| H  | 1.513294  | -1.688248 | 1.437219  |
| C  | 0.525944  | -3.891334 | 3.770941  |
| H  | -0.899774 | -3.522158 | 5.344033  |
| H  | 1.890520  | -3.962152 | 2.111771  |
| H  | 0.697726  | -4.921140 | 4.055993  |
| N  | 1.264478  | 1.553735  | 1.270767  |
| N  | -0.461938 | 0.245577  | 1.134747  |
| H  | -0.275874 | -1.374890 | -0.968773 |
| H  | -3.017197 | 0.234446  | 1.924883  |
| C  | -2.006233 | -3.076670 | -2.161071 |
| C  | -2.244275 | -2.718920 | -3.517096 |
| C  | -1.535800 | -4.381220 | -1.838464 |
| C  | -2.016961 | -3.676967 | -4.521951 |
| C  | -1.325414 | -5.302910 | -2.880534 |
| C  | -1.560785 | -4.951162 | -4.204661 |
| H  | -2.198966 | -3.441733 | -5.562204 |
| H  | -0.984476 | -6.307918 | -2.670546 |
| H  | -1.394424 | -5.675174 | -4.991984 |
| C  | -5.196342 | -1.127088 | 1.111371  |
| C  | -5.531881 | -1.940905 | 2.228796  |

|    |           |           |           |
|----|-----------|-----------|-----------|
| C  | -6.170255 | -0.267277 | 0.531849  |
| C  | -6.839555 | -1.877596 | 2.743826  |
| C  | -7.464044 | -0.240684 | 1.083498  |
| C  | -7.791305 | -1.036454 | 2.176531  |
| H  | -7.130544 | -2.486385 | 3.589720  |
| H  | -8.230258 | 0.398588  | 0.665029  |
| H  | -8.792740 | -1.002996 | 2.586167  |
| C  | -5.856124 | 0.621730  | -0.672887 |
| H  | -4.799485 | 0.510421  | -0.990519 |
| C  | -6.035581 | 2.105729  | -0.331509 |
| H  | -5.407666 | 2.371674  | 0.545779  |
| H  | -5.713871 | 2.732749  | -1.190248 |
| H  | -7.095290 | 2.344122  | -0.102321 |
| C  | -6.706466 | 0.226484  | -1.885842 |
| H  | -6.567744 | -0.852882 | -2.109650 |
| H  | -7.784340 | 0.420456  | -1.702938 |
| H  | -6.389792 | 0.808053  | -2.778077 |
| C  | -4.521609 | -2.889693 | 2.876887  |
| H  | -3.532874 | -2.828311 | 2.378272  |
| C  | -4.970081 | -4.349484 | 2.741411  |
| H  | -4.178057 | -5.027602 | 3.125503  |
| H  | -5.903683 | -4.539353 | 3.311671  |
| H  | -5.144849 | -4.593771 | 1.671633  |
| C  | -4.276531 | -2.519782 | 4.344670  |
| H  | -3.475086 | -3.160882 | 4.769177  |
| H  | -3.949198 | -1.460564 | 4.418191  |
| H  | -5.193245 | -2.657124 | 4.955524  |
| C  | -1.278805 | -4.821831 | -0.396303 |
| H  | -1.426331 | -3.982796 | 0.313586  |
| C  | -2.747716 | -1.332518 | -3.915394 |
| H  | -2.828499 | -0.668527 | -3.031254 |
| C  | -1.771295 | -0.642133 | -4.875951 |
| H  | -0.755049 | -0.621702 | -4.429107 |
| H  | -1.722740 | -1.165841 | -5.853345 |
| H  | -2.094422 | 0.404493  | -5.060110 |
| C  | -4.153538 | -1.412896 | -4.520576 |
| H  | -4.148236 | -1.978689 | -5.476103 |
| H  | -4.843373 | -1.915091 | -3.809025 |
| H  | -4.542387 | -0.390678 | -4.716401 |
| C  | 0.170429  | -5.286209 | -0.200455 |
| H  | 0.394223  | -6.191897 | -0.801254 |
| H  | 0.871630  | -4.477335 | -0.494293 |
| H  | 0.347908  | -5.531311 | 0.867861  |
| C  | -2.268576 | -5.913917 | 0.024194  |
| H  | -3.310524 | -5.554944 | -0.118012 |
| H  | -2.121947 | -6.839727 | -0.571309 |
| H  | -2.131662 | -6.158599 | 1.099381  |
| C  | -1.143661 | 2.423717  | -2.651654 |
| C  | 0.147339  | 2.277108  | -3.284657 |
| H  | 0.764659  | 3.178195  | -3.396013 |
| B  | -1.641868 | 3.669093  | -1.958672 |
| O  | -0.887123 | 4.820012  | -1.720661 |
| O  | -2.953064 | 3.836160  | -1.521504 |
| C  | -1.691026 | 5.705246  | -0.913427 |
| C  | -3.141572 | 5.238183  | -1.260050 |
| C  | -1.349741 | 5.443110  | 0.544519  |
| H  | -0.277364 | 5.607081  | 0.717860  |
| H  | -1.901602 | 6.104753  | 1.226605  |
| H  | -1.587375 | 4.403307  | 0.809242  |
| C  | -1.376202 | 7.137834  | -1.285823 |
| H  | -2.043332 | 7.836753  | -0.760198 |
| H  | -0.344069 | 7.386495  | -1.001525 |
| H  | -1.475912 | 7.311263  | -2.364625 |
| C  | -3.661702 | 5.874940  | -2.540581 |
| H  | -3.900207 | 6.939404  | -2.405352 |
| H  | -2.929101 | 5.786764  | -3.355380 |
| H  | -4.578611 | 5.359374  | -2.856643 |
| C  | -4.145140 | 5.411107  | -0.139535 |
| H  | -3.894161 | 4.795486  | 0.732761  |
| H  | -4.198935 | 6.461814  | 0.181213  |
| H  | -5.148477 | 5.117483  | -0.476190 |
| Na | 5.286469  | -0.826782 | -0.466071 |
| H  | 0.238627  | 1.624330  | -4.158058 |
| H  | -1.883058 | 1.641336  | -2.860860 |
| H  | 1.368348  | 1.400932  | -2.559481 |
| O  | 3.802657  | -2.036035 | -1.828633 |
| O  | 5.797135  | -2.794969 | 0.738520  |
| C  | 4.037392  | -2.759937 | -2.991288 |
| H  | 4.521413  | -2.094630 | -3.737696 |
| H  | 4.724990  | -3.604571 | -2.774563 |
| C  | 2.434624  | -1.803369 | -1.728960 |
| H  | 2.046661  | -2.343417 | -0.840792 |
| H  | 2.246106  | -0.719797 | -1.588586 |
| C  | 1.738043  | -2.305725 | -2.976793 |
| H  | 0.771536  | -2.797936 | -2.744772 |
| H  | 1.574535  | -1.468095 | -3.689679 |
| C  | 2.724254  | -3.274981 | -3.537313 |
| H  | 2.520897  | -4.295601 | -3.142694 |



|   |          |           |           |
|---|----------|-----------|-----------|
| H | 2.710477 | -3.284886 | -4.648861 |
| C | 6.160261 | -2.700160 | 2.079594  |
| H | 7.259790 | -2.839064 | 2.161337  |
| H | 5.905565 | -1.691761 | 2.467288  |
| C | 4.881769 | -3.834162 | 0.617050  |
| H | 3.857068 | -3.409519 | 0.550956  |
| H | 5.088234 | -4.412607 | -0.308048 |
| C | 4.987875 | -4.725847 | 1.831425  |
| H | 5.761161 | -5.507813 | 1.662454  |
| H | 4.016768 | -5.200247 | 2.089375  |
| C | 5.445781 | -3.770476 | 2.883999  |
| H | 4.567232 | -3.332558 | 3.408678  |
| H | 6.121403 | -4.259839 | 3.618865  |
| O | 5.557977 | 0.827437  | -2.177219 |
| C | 6.205856 | 0.597976  | -3.386143 |
| H | 7.099812 | 1.255290  | -3.454913 |
| H | 6.546624 | -0.458555 | -3.418211 |
| C | 4.422570 | 1.573821  | -2.458437 |
| H | 3.628585 | 1.339051  | -1.721043 |
| H | 4.667240 | 2.656338  | -2.384663 |
| C | 5.253809 | 0.874890  | -4.540062 |
| H | 5.624469 | 1.728500  | -5.149568 |
| H | 5.124961 | -0.018642 | -5.189307 |
| C | 3.970274 | 1.239844  | -3.859278 |
| H | 3.467703 | 2.103408  | -4.346700 |
| H | 3.287555 | 0.363292  | -3.839950 |

178

Figure\_S6\_imid-3\_modeS2\_ts(CuHadd)\_04 / electronic energy: -3601.991890631659 a.u. / lowest freq: -703.56 cm-1

|    |           |           |           |
|----|-----------|-----------|-----------|
| C  | 0.936801  | 1.323240  | 2.705492  |
| H  | 1.841056  | 0.779093  | 3.013545  |
| C  | -0.315294 | 0.414957  | 2.612221  |
| H  | -1.198312 | 0.874978  | 3.087477  |
| C  | 0.259901  | 1.156094  | 0.440175  |
| C  | 2.051809  | 2.706759  | 0.831169  |
| C  | 1.560983  | 3.752659  | 0.038119  |
| C  | 3.436945  | 2.619309  | 1.060501  |
| C  | 2.409174  | 4.719055  | -0.489922 |
| H  | 0.487132  | 3.804337  | -0.158911 |
| C  | 4.276920  | 3.617144  | 0.555484  |
| C  | 3.773337  | 4.667674  | -0.207667 |
| H  | 1.991905  | 5.513787  | -1.113990 |
| H  | 5.349827  | 3.522560  | 0.732589  |
| H  | 4.451527  | 5.428432  | -0.600111 |
| C  | -1.514697 | -0.468319 | 0.546542  |
| C  | -2.824821 | -0.506996 | 1.044429  |
| C  | -1.159867 | -1.306202 | -0.519835 |
| C  | -3.766247 | -1.378220 | 0.480608  |
| C  | -2.084865 | -2.211411 | -1.051449 |
| C  | -3.392009 | -2.239949 | -0.556594 |
| H  | -4.113687 | -2.933931 | -0.972179 |
| S  | 4.222433  | 1.179179  | 1.806748  |
| O  | 5.631617  | 1.225064  | 1.320673  |
| O  | 3.499122  | 0.017081  | 1.207403  |
| O  | 4.088716  | 1.296665  | 3.269716  |
| Cu | 0.264961  | 1.600937  | -1.417064 |
| C  | 0.726398  | 2.505027  | 3.620254  |
| C  | 1.492873  | 2.649942  | 4.789907  |
| C  | -0.243549 | 3.477404  | 3.316961  |
| C  | 1.304670  | 3.755101  | 5.625847  |
| H  | 2.230295  | 1.906782  | 5.062011  |
| C  | -0.427491 | 4.581620  | 4.152872  |
| H  | -0.856791 | 3.374618  | 2.433963  |
| C  | 0.348106  | 4.721901  | 5.305883  |
| H  | 1.899820  | 3.860887  | 6.523640  |
| H  | -1.172943 | 5.326984  | 3.907216  |
| H  | 0.204515  | 5.576700  | 5.954009  |
| C  | -0.093612 | -0.952424 | 3.208986  |
| C  | -0.831713 | -1.361460 | 4.333668  |
| C  | 0.839925  | -1.844662 | 2.642094  |
| C  | -0.624747 | -2.632199 | 4.874841  |
| H  | -1.558915 | -0.702079 | 4.790652  |
| C  | 1.035941  | -3.065452 | 3.168253  |
| H  | 1.406667  | -1.552609 | 1.768062  |
| C  | 0.311483  | -3.486767 | 4.288726  |
| H  | -1.184779 | -2.952319 | 5.743705  |
| H  | 1.761479  | -3.731942 | 2.723681  |
| H  | 0.477700  | -4.473283 | 4.701571  |
| N  | 1.108126  | 1.761576  | 1.299647  |
| N  | -0.534426 | 0.348137  | 1.157668  |
| H  | -0.152078 | -1.286072 | -0.901272 |
| H  | -3.116574 | 0.141712  | 1.860841  |
| C  | -1.668503 | -3.175613 | -2.088164 |
| C  | -1.909211 | -2.894693 | -3.461946 |
| C  | -1.057702 | -4.404458 | -1.707450 |
| C  | -1.550976 | -3.856025 | -4.424715 |
| C  | -0.716730 | -5.331258 | -2.709739 |
| C  | -0.959657 | -5.056787 | -4.050371 |
| H  | -1.731357 | -3.679675 | -5.476811 |

|    |           |           |           |
|----|-----------|-----------|-----------|
| H  | -0.266239 | -6.281433 | -2.455599 |
| H  | -0.691511 | -5.783841 | -4.806154 |
| C  | -5.152684 | -1.392531 | 0.978147  |
| C  | -5.499062 | -2.205222 | 2.092903  |
| C  | -6.146962 | -0.615097 | 0.321198  |
| C  | -6.836858 | -2.222345 | 2.528521  |
| C  | -7.469248 | -0.662728 | 0.798801  |
| C  | -7.806772 | -1.457034 | 1.889510  |
| H  | -7.137558 | -2.836143 | 3.367312  |
| H  | -8.250520 | -0.086023 | 0.321413  |
| H  | -8.830731 | -1.483817 | 2.239640  |
| C  | -5.825947 | 0.258304  | -0.893202 |
| H  | -4.748919 | 0.207667  | -1.152475 |
| C  | -6.118030 | 1.736252  | -0.609688 |
| H  | -5.550984 | 2.069593  | 0.285840  |
| H  | -5.796840 | 2.355949  | -1.473736 |
| H  | -7.200763 | 1.910482  | -0.437462 |
| C  | -6.583252 | -0.225975 | -2.135318 |
| H  | -6.368305 | -1.301090 | -2.314384 |
| H  | -7.679239 | -0.093402 | -2.016568 |
| H  | -6.253790 | 0.346375  | -3.028853 |
| C  | -4.469500 | -3.074093 | 2.817238  |
| H  | -3.456097 | -2.942672 | 2.385994  |
| C  | -4.802748 | -4.562756 | 2.665470  |
| H  | -3.995460 | -5.180846 | 3.113689  |
| H  | -5.760369 | -4.814584 | 3.168010  |
| H  | -4.880466 | -4.825010 | 1.588442  |
| C  | -4.352191 | -2.681503 | 4.294959  |
| H  | -3.546425 | -3.270864 | 4.780757  |
| H  | -4.096031 | -1.603813 | 4.380982  |
| H  | -5.298682 | -2.872356 | 4.842486  |
| C  | -0.789690 | -4.764808 | -0.245002 |
| H  | -1.064196 | -3.931182 | 0.432729  |
| C  | -2.542902 | -1.584117 | -3.925163 |
| H  | -2.715942 | -0.900351 | -3.069538 |
| C  | -1.616928 | -0.831146 | -4.889231 |
| H  | -0.618489 | -0.693961 | -4.422781 |
| H  | -1.492404 | -1.379669 | -5.846082 |
| H  | -2.038532 | 0.170715  | -5.117947 |
| C  | -3.915027 | -1.833915 | -4.560508 |
| H  | -3.823698 | -2.428793 | -5.493767 |
| H  | -4.567618 | -2.381934 | -3.847771 |
| H  | -4.403336 | -0.866101 | -4.803951 |
| C  | 0.700517  | -5.034934 | 0.002566  |
| H  | 1.064405  | -5.900443 | -0.588656 |
| H  | 1.298162  | -4.139459 | -0.265715 |
| H  | 0.871667  | -5.258731 | 1.075975  |
| C  | -1.645405 | -5.960799 | 0.187649  |
| H  | -2.719694 | -5.743243 | 0.004707  |
| H  | -1.363279 | -6.879373 | -0.368904 |
| H  | -1.512564 | -6.150770 | 1.274358  |
| C  | -1.122950 | 2.308962  | -2.772316 |
| C  | 0.209918  | 2.218061  | -3.323445 |
| H  | 0.775354  | 3.151188  | -3.444563 |
| B  | -1.733744 | 3.536696  | -2.141527 |
| O  | -1.070501 | 4.741191  | -1.896060 |
| O  | -3.075835 | 3.625135  | -1.779261 |
| C  | -1.975524 | 5.590209  | -1.159547 |
| C  | -3.370952 | 5.016796  | -1.569193 |
| C  | -1.698191 | 5.388988  | 0.321436  |
| H  | -0.652641 | 5.638839  | 0.548459  |
| H  | -2.335957 | 6.022546  | 0.953188  |
| H  | -1.872203 | 4.339952  | 0.601055  |
| C  | -1.739843 | 7.031041  | -1.557086 |
| H  | -2.482985 | 7.694471  | -1.090786 |
| H  | -0.745866 | 7.361267  | -1.223819 |
| H  | -1.790112 | 7.167951  | -2.644396 |
| C  | -3.861353 | 5.584890  | -2.893180 |
| H  | -4.177378 | 6.633615  | -2.800968 |
| H  | -3.082100 | 5.527328  | -3.666307 |
| H  | -4.723379 | 5.000481  | -3.242204 |
| C  | -4.444698 | 5.151160  | -0.509926 |
| H  | -4.204195 | 4.575600  | 0.391949  |
| H  | -4.584488 | 6.203807  | -0.223240 |
| H  | -5.406534 | 4.783946  | -0.892195 |
| Na | 5.291940  | -0.645857 | -0.193655 |
| H  | 0.391151  | 1.534253  | -4.158207 |
| H  | -1.800108 | 1.473676  | -2.987001 |
| H  | 1.439757  | 1.461835  | -2.486849 |
| O  | 3.926471  | -1.998007 | -1.558791 |
| O  | 5.665156  | -2.486137 | 1.210502  |
| C  | 2.625979  | -1.527578 | -1.644495 |
| H  | 2.050968  | -1.894234 | -0.767825 |
| H  | 2.622835  | -0.420614 | -1.627062 |
| C  | 3.936442  | -3.241660 | -2.175449 |
| H  | 4.916226  | -3.396845 | -2.674931 |
| H  | 3.803843  | -4.033353 | -1.405786 |
| C  | 2.806984  | -3.300984 | -3.191744 |

|   |          |           |           |
|---|----------|-----------|-----------|
| H | 3.203316 | -3.310965 | -4.230773 |
| H | 2.176440 | -4.201793 | -3.023556 |
| C | 2.025601 | -2.044822 | -2.932276 |
| H | 2.190643 | -1.311886 | -3.752162 |
| H | 0.940942 | -2.250099 | -2.826687 |
| C | 4.477336 | -2.997933 | 1.725788  |
| H | 4.304881 | -2.582830 | 2.742391  |
| H | 3.636150 | -2.682952 | 1.074952  |
| C | 6.579141 | -3.526846 | 1.140282  |
| H | 7.221469 | -3.400477 | 0.243007  |
| H | 7.224532 | -3.506952 | 2.046159  |
| C | 5.823911 | -4.833053 | 1.067163  |
| H | 6.378825 | -5.658294 | 1.564085  |
| H | 5.622213 | -5.096805 | 0.005653  |
| C | 4.543020 | -4.514925 | 1.773108  |
| H | 3.672424 | -4.980353 | 1.260830  |
| H | 4.586908 | -4.864490 | 2.828288  |
| O | 5.601803 | 0.789135  | -2.061367 |
| C | 6.038243 | 0.227690  | -3.257761 |
| H | 7.144587 | 0.303504  | -3.323255 |
| H | 5.760160 | -0.847729 | -3.271152 |
| C | 4.670086 | 1.776604  | -2.362224 |
| H | 3.804633 | 1.699398  | -1.673445 |
| H | 5.144571 | 2.772392  | -2.223602 |
| C | 5.389666 | 0.939179  | -4.428457 |
| H | 6.087517 | 1.695990  | -4.850698 |
| H | 5.074328 | 0.228377  | -5.223264 |
| C | 4.219940 | 1.617924  | -3.796872 |
| H | 3.996474 | 2.597067  | -4.273408 |
| H | 3.329207 | 0.955751  | -3.849538 |

178

Figure\_S6\_imid-3\_modeS2\_ts(CuHadd)\_05 / electronic energy: -3601.992017267920 a.u. / lowest freq: -736.03 cm<sup>-1</sup>

|    |           |           |           |
|----|-----------|-----------|-----------|
| C  | 1.079979  | 1.150351  | 2.722192  |
| H  | 1.970807  | 0.572514  | 3.004918  |
| C  | -0.194797 | 0.275336  | 2.608404  |
| H  | -1.043683 | 0.702026  | 3.168147  |
| C  | 0.347880  | 1.133846  | 0.468842  |
| C  | 2.244997  | 2.543513  | 0.888420  |
| C  | 1.812973  | 3.654898  | 0.152134  |
| C  | 3.625411  | 2.353570  | 1.081728  |
| C  | 2.716667  | 4.584313  | -0.351043 |
| H  | 0.741812  | 3.784265  | -0.023515 |
| C  | 4.523769  | 3.310798  | 0.600916  |
| C  | 4.079450  | 4.427239  | -0.103222 |
| H  | 2.344775  | 5.433662  | -0.930074 |
| H  | 5.590818  | 3.131958  | 0.746456  |
| H  | 4.800425  | 5.156371  | -0.478994 |
| C  | -1.515468 | -0.394194 | 0.538413  |
| C  | -2.801079 | -0.431828 | 1.095527  |
| C  | -1.238886 | -1.159512 | -0.603717 |
| C  | -3.796547 | -1.228467 | 0.516041  |
| C  | -2.219935 | -1.989030 | -1.159334 |
| C  | -3.502704 | -2.015468 | -0.603033 |
| H  | -4.266770 | -2.653252 | -1.032606 |
| S  | 4.310440  | 0.822712  | 1.732881  |
| O  | 5.706378  | 0.768419  | 1.210616  |
| O  | 3.472318  | -0.238276 | 1.101190  |
| O  | 4.227516  | 0.879273  | 3.204270  |
| Cu | 0.366304  | 1.650699  | -1.366431 |
| C  | 0.907468  | 2.304944  | 3.678588  |
| C  | 1.717205  | 2.412857  | 4.822762  |
| C  | -0.065025 | 3.291995  | 3.436367  |
| C  | 1.567054  | 3.495445  | 5.695080  |
| H  | 2.460783  | 1.659372  | 5.045697  |
| C  | -0.210686 | 4.373640  | 4.308615  |
| H  | -0.711267 | 3.217311  | 2.573739  |
| C  | 0.606586  | 4.476686  | 5.436574  |
| H  | 2.195400  | 3.572945  | 6.572934  |
| H  | -0.958773 | 5.130436  | 4.110590  |
| H  | 0.492685  | 5.314064  | 6.112726  |
| C  | 0.027292  | -1.144587 | 3.069276  |
| C  | -0.622888 | -1.625333 | 4.219546  |
| C  | 0.873711  | -2.013082 | 2.349953  |
| C  | -0.414501 | -2.942473 | 4.635323  |
| H  | -1.282435 | -0.985809 | 4.792567  |
| C  | 1.070937  | -3.278335 | 2.754671  |
| H  | 1.367064  | -1.669058 | 1.451758  |
| C  | 0.435731  | -3.771105 | 3.899589  |
| H  | -0.908062 | -3.318488 | 5.521972  |
| H  | 1.727656  | -3.924106 | 2.190327  |
| H  | 0.602967  | -4.793064 | 4.214091  |
| N  | 1.252532  | 1.638674  | 1.334332  |
| N  | -0.482428 | 0.342444  | 1.164719  |
| H  | -0.247306 | -1.146331 | -1.025195 |
| H  | -3.031477 | 0.158257  | 1.973714  |
| C  | -1.892066 | -2.878707 | -2.291407 |
| C  | -2.214270 | -2.487938 | -3.621332 |
| C  | -1.323627 | -4.160886 | -2.042951 |

|    |           |           |           |
|----|-----------|-----------|-----------|
| C  | -1.978850 | -3.393848 | -4.671659 |
| C  | -1.110633 | -5.030154 | -3.128794 |
| C  | -1.430868 | -4.646909 | -4.425623 |
| H  | -2.229635 | -3.136193 | -5.691994 |
| H  | -0.705023 | -6.020972 | -2.974574 |
| H  | -1.261659 | -5.331464 | -5.246900 |
| C  | -5.151222 | -1.251506 | 1.093698  |
| C  | -5.456163 | -2.153408 | 2.150510  |
| C  | -6.152471 | -0.378283 | 0.584666  |
| C  | -6.759505 | -2.159638 | 2.680293  |
| C  | -7.438987 | -0.419317 | 1.152288  |
| C  | -7.735596 | -1.299826 | 2.187452  |
| H  | -7.027718 | -2.836491 | 3.480756  |
| H  | -8.223998 | 0.231359  | 0.790009  |
| H  | -8.732494 | -1.319008 | 2.608908  |
| C  | -5.876707 | 0.593894  | -0.564033 |
| H  | -4.827995 | 0.514503  | -0.915507 |
| C  | -6.060934 | 2.049166  | -0.117910 |
| H  | -5.398489 | 2.267536  | 0.747027  |
| H  | -5.787117 | 2.735636  | -0.946926 |
| H  | -7.112794 | 2.253784  | 0.172214  |
| C  | -6.753934 | 0.273818  | -1.780383 |
| H  | -6.620375 | -0.789064 | -2.074606 |
| H  | -7.827567 | 0.454438  | -1.562494 |
| H  | -6.457555 | 0.910982  | -2.641040 |
| C  | -4.417780 | -3.123437 | 2.717035  |
| H  | -3.435358 | -2.999706 | 2.212728  |
| C  | -4.833381 | -4.578976 | 2.473709  |
| H  | -4.021624 | -5.265268 | 2.797311  |
| H  | -5.756065 | -4.834373 | 3.036144  |
| H  | -5.014192 | -4.744723 | 1.389980  |
| C  | -4.168431 | -2.861267 | 4.207047  |
| H  | -3.355991 | -3.521500 | 4.577338  |
| H  | -3.855575 | -1.805947 | 4.358279  |
| H  | -5.078595 | -3.057871 | 4.811350  |
| C  | -0.984257 | -4.643962 | -0.631619 |
| H  | -1.119950 | -3.834202 | 0.113606  |
| C  | -2.826197 | -1.125474 | -3.942865 |
| H  | -2.874094 | -0.487874 | -3.036859 |
| C  | -1.972772 | -0.354314 | -4.958935 |
| H  | -0.922590 | -0.295695 | -4.603501 |
| H  | -1.986286 | -0.841074 | -5.956224 |
| H  | -2.362401 | 0.679312  | -5.076227 |
| C  | -4.267401 | -1.279924 | -4.440327 |
| H  | -4.301887 | -1.828613 | -5.405301 |
| H  | -4.869083 | -1.835711 | -3.689828 |
| H  | -4.729994 | -0.279975 | -4.583628 |
| C  | 0.484523  | -5.075516 | -0.518763 |
| H  | 0.703150  | -5.958296 | -1.154152 |
| H  | 1.149938  | -4.241871 | -0.822229 |
| H  | 0.720331  | -5.346717 | 0.531224  |
| C  | -1.923542 | -5.777986 | -0.207094 |
| H  | -2.980022 | -5.441756 | -0.281656 |
| H  | -1.784717 | -6.674282 | -0.848064 |
| H  | -1.725562 | -6.061983 | 0.848734  |
| C  | -0.969210 | 2.511934  | -2.681148 |
| C  | 0.348652  | 2.337926  | -3.249138 |
| H  | 0.985005  | 3.227781  | -3.341202 |
| B  | -1.487642 | 3.748364  | -1.988713 |
| O  | -0.750791 | 4.903380  | -1.715929 |
| O  | -2.812278 | 3.897970  | -1.584202 |
| C  | -1.586082 | 5.773888  | -0.924192 |
| C  | -3.022641 | 5.293668  | -1.310246 |
| C  | -1.278765 | 5.507419  | 0.540750  |
| H  | -0.216105 | 5.696523  | 0.745421  |
| H  | -1.865152 | 6.149881  | 1.212190  |
| H  | -1.497598 | 4.459601  | 0.790826  |
| C  | -1.276865 | 7.212227  | -1.279021 |
| H  | -1.963511 | 7.901283  | -0.765664 |
| H  | -0.254604 | 7.468665  | -0.967134 |
| H  | -1.350521 | 7.392591  | -2.358689 |
| C  | -3.521935 | 5.940495  | -2.594359 |
| H  | -3.773952 | 7.000944  | -2.452248 |
| H  | -2.771639 | 5.868826  | -3.394511 |
| H  | -4.426789 | 5.419830  | -2.935865 |
| C  | -4.055488 | 5.437681  | -0.212030 |
| H  | -3.816602 | 4.814397  | 0.658276  |
| H  | -4.135090 | 6.482995  | 0.120694  |
| H  | -5.044969 | 5.131940  | -0.577790 |
| Na | 5.208408  | -1.081153 | -0.304645 |
| H  | 0.467813  | 1.674717  | -4.111415 |
| H  | -1.706813 | 1.734507  | -2.911875 |
| H  | 1.515098  | 1.453755  | -2.458690 |
| O  | 3.746971  | -2.193108 | -1.898389 |
| O  | 5.184800  | -3.041624 | 1.023592  |
| C  | 2.528800  | -1.531235 | -1.840437 |
| H  | 1.917503  | -1.979704 | -1.029777 |
| H  | 2.695827  | -0.462802 | -1.602671 |

|   |          |           |           |
|---|----------|-----------|-----------|
| C | 3.659194 | -3.153783 | -2.900722 |
| H | 4.534109 | -3.048143 | -3.576764 |
| H | 3.689468 | -4.167345 | -2.446862 |
| C | 2.372089 | -2.969644 | -3.687238 |
| H | 2.559828 | -2.925137 | -4.782221 |
| H | 1.662640 | -3.796475 | -3.461990 |
| C | 1.831993 | -1.674067 | -3.173681 |
| H | 2.124346 | -0.840423 | -3.848364 |
| H | 0.727671 | -1.701567 | -3.071794 |
| C | 4.959412 | -2.970166 | 2.391785  |
| H | 5.823556 | -2.478319 | 2.886462  |
| H | 4.048827 | -2.363107 | 2.587334  |
| C | 4.508202 | -4.167149 | 0.576255  |
| H | 3.471816 | -3.884325 | 0.287787  |
| H | 5.024464 | -4.581594 | -0.315195 |
| C | 4.481710 | -5.190547 | 1.694166  |
| H | 5.275565 | -5.954193 | 1.539188  |
| H | 3.490364 | -5.690438 | 1.755622  |
| C | 4.770249 | -4.377352 | 2.926071  |
| H | 3.925296 | -4.419215 | 3.647927  |
| H | 5.700817 | -4.735310 | 3.419198  |
| O | 5.628194 | 0.425925  | -2.092456 |
| C | 6.141864 | -0.043759 | -3.291679 |
| H | 7.144159 | 0.408005  | -3.463743 |
| H | 6.255354 | -1.147248 | -3.244359 |
| C | 4.892293 | 1.568149  | -2.386745 |
| H | 3.985741 | 1.595829  | -1.748065 |
| H | 5.506187 | 2.466889  | -2.159163 |
| C | 5.195063 | 0.343329  | -4.403978 |
| H | 5.742769 | 0.569599  | -5.344605 |
| H | 4.463244 | -0.474266 | -4.582393 |
| C | 4.500672 | 1.555366  | -3.855839 |
| H | 4.861132 | 2.477896  | -4.361860 |
| H | 3.400194 | 1.470855  | -3.982656 |

178

Figure\_S6\_imid-3\_modeS2\_ts(CuHadd)\_06 / electronic energy: -3601.981304303318 a.u. / lowest freq: -668.67 cm-1

|    |           |           |           |
|----|-----------|-----------|-----------|
| C  | 0.751728  | 1.281234  | 2.617310  |
| H  | 1.574674  | 0.612040  | 2.907206  |
| C  | -0.598819 | 0.551645  | 2.493874  |
| H  | -1.445331 | 1.209895  | 2.761540  |
| C  | 0.179815  | 1.058033  | 0.334578  |
| C  | 1.976283  | 2.593366  | 0.732941  |
| C  | 1.548916  | 3.588449  | -0.158050 |
| C  | 3.347112  | 2.494032  | 1.030006  |
| C  | 2.443097  | 4.489733  | -0.722974 |
| H  | 0.485219  | 3.657384  | -0.399714 |
| C  | 4.235611  | 3.422718  | 0.475506  |
| C  | 3.794789  | 4.420344  | -0.389273 |
| H  | 2.070402  | 5.248073  | -1.416743 |
| H  | 5.296707  | 3.316933  | 0.707472  |
| H  | 4.510124  | 5.128211  | -0.813326 |
| C  | -1.645750 | -0.497804 | 0.417831  |
| C  | -2.998749 | -0.352337 | 0.761746  |
| C  | -1.270003 | -1.482009 | -0.508181 |
| C  | -3.965655 | -1.181960 | 0.177801  |
| C  | -2.233932 | -2.329533 | -1.067918 |
| C  | -3.581779 | -2.170394 | -0.733804 |
| H  | -4.326845 | -2.830971 | -1.162624 |
| S  | 4.068718  | 1.157863  | 1.997479  |
| O  | 5.491686  | 1.099650  | 1.543235  |
| O  | 3.344887  | -0.080107 | 1.578224  |
| O  | 3.902970  | 1.513994  | 3.416400  |
| Cu | 0.207968  | 1.449665  | -1.538138 |
| C  | 0.683237  | 2.446513  | 3.570989  |
| C  | 1.272435  | 2.351828  | 4.843649  |
| C  | -0.010112 | 3.620603  | 3.226958  |
| C  | 1.197939  | 3.423319  | 5.738867  |
| H  | 1.781317  | 1.445952  | 5.147855  |
| C  | -0.081655 | 4.690268  | 4.123081  |
| H  | -0.494663 | 3.704667  | 2.266205  |
| C  | 0.525198  | 4.593241  | 5.377391  |
| H  | 1.657815  | 3.344446  | 6.715427  |
| H  | -0.611430 | 5.592579  | 3.846052  |
| H  | 0.467656  | 5.421261  | 6.071968  |
| C  | -0.662433 | -0.709564 | 3.315561  |
| C  | -1.545932 | -0.796210 | 4.405357  |
| C  | 0.148465  | -1.820144 | 3.001225  |
| C  | -1.602713 | -1.969122 | 5.160812  |
| H  | -2.182171 | 0.038413  | 4.672016  |
| C  | 0.083228  | -2.949639 | 3.727070  |
| H  | 0.829724  | -1.773295 | 2.161079  |
| C  | -0.788955 | -3.050638 | 4.816807  |
| H  | -2.275485 | -2.040834 | 6.005447  |
| H  | 0.711081  | -3.791721 | 3.470446  |
| H  | -0.831289 | -3.965256 | 5.393837  |
| N  | 0.982208  | 1.706964  | 1.212513  |
| N  | -0.650376 | 0.282059  | 1.049199  |
| H  | -0.223321 | -1.620470 | -0.753371 |

|    |           |           |           |
|----|-----------|-----------|-----------|
| H  | -3.301458 | 0.399489  | 1.479630  |
| C  | -1.822931 | -3.442934 | -1.944860 |
| C  | -1.778390 | -3.243421 | -3.356431 |
| C  | -1.498357 | -4.657575 | -1.399568 |
| C  | -1.376458 | -4.310463 | -4.180261 |
| C  | -1.084628 | -5.706929 | -2.246583 |
| C  | -1.024155 | -5.532767 | -3.624269 |
| H  | -1.336214 | -4.200183 | -5.255865 |
| H  | -0.812054 | -6.672162 | -1.840778 |
| H  | -0.711162 | -6.349533 | -4.261968 |
| C  | -5.387061 | -1.048337 | 0.543889  |
| C  | -5.897680 | -1.753616 | 1.669417  |
| C  | -6.261185 | -0.284671 | -0.278888 |
| C  | -7.275080 | -1.679895 | 1.947238  |
| C  | -7.631237 | -0.247343 | 0.039068  |
| C  | -8.128175 | -0.934081 | 1.141290  |
| H  | -7.699954 | -2.214978 | 2.786147  |
| H  | -8.326844 | 0.309739  | -0.574422 |
| H  | -9.186044 | -0.895508 | 1.367677  |
| C  | -5.763022 | 0.473721  | -1.510028 |
| H  | -4.659234 | 0.410287  | -1.601709 |
| C  | -6.087495 | 1.969294  | -1.414228 |
| H  | -5.670101 | 2.385459  | -0.472685 |
| H  | -5.631077 | 2.511703  | -2.269036 |
| H  | -7.181891 | 2.152319  | -1.435601 |
| C  | -6.336550 | -0.134148 | -2.794861 |
| H  | -6.083187 | -1.214669 | -2.847858 |
| H  | -7.440590 | -0.021064 | -2.834486 |
| H  | -5.896710 | 0.367743  | -3.683160 |
| C  | -5.005637 | -2.619231 | 2.561071  |
| H  | -3.942154 | -2.553144 | 2.253312  |
| C  | -5.389513 | -4.098871 | 2.446148  |
| H  | -4.673417 | -4.723844 | 3.021639  |
| H  | -6.412280 | -4.280709 | 2.838572  |
| H  | -5.349366 | -4.418340 | 1.382697  |
| C  | -5.049147 | -2.149416 | 4.020276  |
| H  | -4.345835 | -2.752089 | 4.632265  |
| H  | -4.743144 | -1.083259 | 4.084252  |
| H  | -6.064323 | -2.260806 | 4.454609  |
| C  | -1.577073 | -4.928291 | 0.108743  |
| H  | -1.951848 | -4.047051 | 0.668001  |
| C  | -2.170930 | -1.915781 | -4.004771 |
| H  | -2.442796 | -1.160178 | -3.240565 |
| C  | -1.001654 | -1.316605 | -4.794553 |
| H  | -0.122272 | -1.190007 | -4.127522 |
| H  | -0.714695 | -1.962544 | -5.650334 |
| H  | -1.286780 | -0.320176 | -5.193573 |
| C  | -3.409298 | -2.083109 | -4.893025 |
| H  | -3.196005 | -2.740519 | -5.762123 |
| H  | -4.241271 | -2.524149 | -4.303244 |
| H  | -3.741785 | -1.093120 | -5.272423 |
| C  | -0.190862 | -5.227326 | 0.686936  |
| H  | 0.254729  | -6.135288 | 0.229547  |
| H  | 0.479244  | -4.361945 | 0.503572  |
| H  | -0.261164 | -5.385881 | 1.783819  |
| C  | -2.563734 | -6.060670 | 0.421086  |
| H  | -3.553454 | -5.835872 | -0.030944 |
| H  | -2.201187 | -7.034405 | 0.030379  |
| H  | -2.699256 | -6.153689 | 1.520041  |
| C  | -1.213743 | 2.152470  | -2.873602 |
| C  | 0.104851  | 2.043290  | -3.448781 |
| H  | 0.681756  | 2.967862  | -3.579306 |
| B  | -1.777535 | 3.418303  | -2.272897 |
| O  | -1.056974 | 4.599810  | -2.078135 |
| O  | -3.106288 | 3.579810  | -1.895950 |
| C  | -1.911557 | 5.510878  | -1.356152 |
| C  | -3.335758 | 4.990281  | -1.731726 |
| C  | -1.623484 | 5.342111  | 0.126916  |
| H  | -0.564757 | 5.553016  | 0.331350  |
| H  | -2.222831 | 6.023668  | 0.746227  |
| H  | -1.838161 | 4.310759  | 0.444907  |
| C  | -1.614202 | 6.926344  | -1.800951 |
| H  | -2.317280 | 7.638440  | -1.344499 |
| H  | -0.599857 | 7.217445  | -1.493480 |
| H  | -1.676229 | 7.032216  | -2.891108 |
| C  | -3.816069 | 5.534001  | -3.069450 |
| H  | -4.083997 | 6.598322  | -3.010067 |
| H  | -3.050287 | 5.415372  | -3.849021 |
| H  | -4.707740 | 4.977436  | -3.388127 |
| C  | -4.388528 | 5.214562  | -0.666719 |
| H  | -4.169367 | 4.653858  | 0.250079  |
| H  | -4.465421 | 6.281617  | -0.411118 |
| H  | -5.374139 | 4.891829  | -1.027836 |
| Na | 5.207240  | -0.907463 | 0.340347  |
| H  | 0.273542  | 1.351065  | -4.278139 |
| H  | -1.907126 | 1.325527  | -3.071572 |
| H  | 1.355787  | 1.261594  | -2.619691 |
| O  | 7.260558  | -1.504137 | -0.590250 |

|   |          |           |           |
|---|----------|-----------|-----------|
| O | 4.591601 | -3.140946 | 0.151293  |
| C | 7.196272 | -2.153122 | -1.816087 |
| H | 7.872404 | -3.036668 | -1.799379 |
| H | 6.160708 | -2.508585 | -1.997905 |
| C | 8.249734 | -0.538104 | -0.707821 |
| H | 8.012270 | 0.321040  | -0.045359 |
| H | 9.224772 | -0.969949 | -0.389792 |
| C | 8.318967 | -0.086975 | -2.153870 |
| H | 7.782921 | 0.878265  | -2.286863 |
| H | 9.374168 | 0.023905  | -2.486507 |
| C | 7.618124 | -1.185084 | -2.904101 |
| H | 6.727740 | -0.786545 | -3.437001 |
| H | 8.298617 | -1.677678 | -3.632535 |
| C | 5.399871 | -4.067803 | 0.797072  |
| H | 5.598899 | -4.921802 | 0.112286  |
| H | 6.370060 | -3.595062 | 1.058670  |
| C | 3.285193 | -3.458378 | 0.491520  |
| H | 2.650978 | -2.548352 | 0.444579  |
| H | 2.887316 | -4.202749 | -0.234040 |
| C | 3.288954 | -4.033850 | 1.891066  |
| H | 2.540416 | -4.848401 | 1.996714  |
| H | 3.085106 | -3.231721 | 2.634195  |
| C | 4.692269 | -4.546967 | 2.052612  |
| H | 5.164649 | -4.115931 | 2.962769  |
| H | 4.708534 | -5.657281 | 2.113881  |
| O | 4.275403 | -0.264765 | -1.636121 |
| C | 4.326900 | 0.993842  | -2.217139 |
| H | 3.565057 | 1.648832  | -1.744309 |
| H | 5.327953 | 1.442628  | -2.047451 |
| C | 3.357525 | -0.995590 | -2.376145 |
| H | 3.616709 | -2.074278 | -2.331956 |
| H | 2.341677 | -0.862339 | -1.941303 |
| C | 4.050295 | 0.849679  | -3.701283 |
| H | 3.377374 | 1.657671  | -4.062614 |
| H | 5.000478 | 0.872403  | -4.278664 |
| C | 3.399245 | -0.502936 | -3.809945 |
| H | 2.376321 | -0.432300 | -4.239001 |
| H | 4.020449 | -1.182146 | -4.434642 |

178

Figure\_S6\_imid-3\_modeS2\_ts(CuHadd)\_07 / electronic energy: -3601.986994980984 a.u. / lowest freq: -591.30 cm<sup>-1</sup>

|    |           |           |           |
|----|-----------|-----------|-----------|
| C  | 0.540775  | 2.033699  | 2.256032  |
| H  | 1.585707  | 1.759142  | 2.457440  |
| C  | -0.426870 | 0.836806  | 2.391050  |
| H  | -1.392948 | 1.130166  | 2.839004  |
| C  | -0.241894 | 1.411638  | 0.112023  |
| C  | 1.006563  | 3.442565  | 0.115318  |
| C  | 0.154732  | 4.191826  | -0.707518 |
| C  | 2.383201  | 3.726477  | 0.106052  |
| C  | 0.638970  | 5.221560  | -1.505595 |
| H  | -0.910179 | 3.945117  | -0.716685 |
| C  | 2.858936  | 4.773448  | -0.689125 |
| C  | 1.999107  | 5.524694  | -1.486308 |
| H  | -0.054676 | 5.778019  | -2.141451 |
| H  | 3.933430  | 4.965144  | -0.694065 |
| H  | 2.397164  | 6.332257  | -2.104514 |
| C  | -1.316446 | -0.695292 | 0.548115  |
| C  | -2.479992 | -1.141333 | 1.190739  |
| C  | -0.761235 | -1.466619 | -0.483625 |
| C  | -3.083053 | -2.343384 | 0.797913  |
| C  | -1.347610 | -2.679495 | -0.859676 |
| C  | -2.513444 | -3.114448 | -0.221608 |
| H  | -2.970922 | -4.053749 | -0.510529 |
| S  | 3.595179  | 2.761721  | 1.019592  |
| O  | 4.901660  | 3.040352  | 0.348971  |
| O  | 3.203127  | 1.335248  | 0.829486  |
| O  | 3.529629  | 3.233856  | 2.414467  |
| Cu | -0.572384 | 1.628544  | -1.763525 |
| C  | 0.143848  | 3.195819  | 3.130134  |
| C  | 0.930928  | 3.552004  | 4.239003  |
| C  | -1.031723 | 3.921423  | 2.867836  |
| C  | 0.561655  | 4.628491  | 5.051455  |
| H  | 1.823941  | 2.991497  | 4.483257  |
| C  | -1.397226 | 4.997757  | 3.680362  |
| H  | -1.663036 | 3.649673  | 2.035480  |
| C  | -0.599221 | 5.353283  | 4.770213  |
| H  | 1.173986  | 4.898269  | 5.902149  |
| H  | -2.300934 | 5.553743  | 3.466424  |
| H  | -0.883611 | 6.185897  | 5.400486  |
| C  | 0.163532  | -0.300701 | 3.185205  |
| C  | -0.356464 | -0.619274 | 4.451781  |
| C  | 1.225933  | -1.071175 | 2.667516  |
| C  | 0.183065  | -1.684596 | 5.175396  |
| H  | -1.171684 | -0.047233 | 4.876870  |
| C  | 1.730998  | -2.103986 | 3.362674  |
| H  | 1.636944  | -0.844784 | 1.691643  |
| C  | 1.226313  | -2.432756 | 4.625630  |
| H  | -0.210980 | -1.934718 | 6.151829  |
| H  | 2.534951  | -2.690468 | 2.943577  |

|    |           |           |           |
|----|-----------|-----------|-----------|
| H  | 1.643686  | -3.266210 | 5.175538  |
| N  | 0.415855  | 2.360425  | 0.814449  |
| N  | -0.654430 | 0.477329  | 0.981214  |
| H  | 0.156940  | -1.150201 | -0.955250 |
| H  | -2.918251 | -0.557761 | 1.990686  |
| C  | -0.716137 | -3.519191 | -1.896850 |
| C  | -1.235971 | -3.524396 | -3.221893 |
| C  | 0.381329  | -4.361149 | -1.557707 |
| C  | -0.659532 | -4.384480 | -4.174250 |
| C  | 0.926590  | -5.196905 | -2.549679 |
| C  | 0.410690  | -5.206121 | -3.840372 |
| H  | -1.041138 | -4.425199 | -5.185838 |
| H  | 1.751691  | -5.859147 | -2.323398 |
| H  | 0.840653  | -5.860793 | -4.587587 |
| C  | -4.312187 | -2.807154 | 1.464068  |
| C  | -4.224267 | -3.646121 | 2.609439  |
| C  | -5.582757 | -2.443980 | 0.937233  |
| C  | -5.413317 | -4.106044 | 3.204603  |
| C  | -6.742146 | -2.920240 | 1.576019  |
| C  | -6.655210 | -3.741268 | 2.695346  |
| H  | -5.383766 | -4.756738 | 4.068544  |
| H  | -7.724505 | -2.664199 | 1.201504  |
| H  | -7.558768 | -4.103874 | 3.168531  |
| C  | -5.726423 | -1.571018 | -0.310642 |
| H  | -4.735716 | -1.270217 | -0.707875 |
| C  | -6.466197 | -0.266220 | 0.005272  |
| H  | -5.935041 | 0.285952  | 0.809941  |
| H  | -6.495010 | 0.379120  | -0.898083 |
| H  | -7.510305 | -0.459852 | 0.328780  |
| C  | -6.419856 | -2.338266 | -1.442758 |
| H  | -5.880062 | -3.288384 | -1.642359 |
| H  | -7.474482 | -2.571367 | -1.185340 |
| H  | -6.410402 | -1.732443 | -2.374096 |
| C  | -2.880692 | -4.081278 | 3.197291  |
| H  | -2.033565 | -3.608676 | 2.659207  |
| C  | -2.684789 | -5.594666 | 3.052795  |
| H  | -1.668924 | -5.881844 | 3.399500  |
| H  | -3.434202 | -6.155970 | 3.649858  |
| H  | -2.780839 | -5.888164 | 1.985338  |
| C  | -2.742390 | -3.643814 | 4.660611  |
| H  | -1.728851 | -3.898050 | 5.036857  |
| H  | -2.879373 | -2.544212 | 4.741782  |
| H  | -3.487997 | -4.149330 | 5.308967  |
| C  | 0.965664  | -4.413657 | -0.144793 |
| H  | 0.474029  | -3.678257 | 0.523103  |
| C  | -2.405622 | -2.634129 | -3.641029 |
| H  | -2.705083 | -1.955458 | -2.816946 |
| C  | -2.023883 | -1.724999 | -4.816588 |
| H  | -1.091689 | -1.171438 | -4.579727 |
| H  | -1.866052 | -2.308220 | -5.747736 |
| H  | -2.831943 | -0.985821 | -5.003260 |
| C  | -3.640020 | -3.477826 | -3.977329 |
| H  | -3.457012 | -4.121196 | -4.863851 |
| H  | -3.903373 | -4.124569 | -3.113327 |
| H  | -4.506269 | -2.816171 | -4.192256 |
| C  | 2.457044  | -4.053990 | -0.144401 |
| H  | 3.058690  | -4.805911 | -0.695997 |
| H  | 2.606296  | -3.060516 | -0.615110 |
| H  | 2.836353  | -4.007481 | 0.897597  |
| C  | 0.729685  | -5.786421 | 0.495072  |
| H  | -0.356159 | -6.022762 | 0.493359  |
| H  | 1.273449  | -6.584751 | -0.052726 |
| H  | 1.079732  | -5.779719 | 1.549645  |
| C  | -2.297707 | 1.623747  | -2.898060 |
| C  | -1.117322 | 1.936349  | -3.670366 |
| H  | -0.971499 | 2.983504  | -3.964678 |
| B  | -3.207157 | 2.659546  | -2.283587 |
| O  | -2.980528 | 4.037517  | -2.314613 |
| O  | -4.418136 | 2.368332  | -1.661091 |
| C  | -4.000753 | 4.664009  | -1.511977 |
| C  | -5.148604 | 3.601230  | -1.543259 |
| C  | -3.439556 | 4.845421  | -0.111339 |
| H  | -2.525425 | 5.454013  | -0.147367 |
| H  | -4.148119 | 5.350006  | 0.559869  |
| H  | -3.188587 | 3.868425  | 0.326081  |
| C  | -4.359978 | 6.002563  | -2.119781 |
| H  | -5.209623 | 6.460029  | -1.591643 |
| H  | -3.510456 | 6.695700  | -2.043622 |
| H  | -4.621904 | 5.912858  | -3.181298 |
| C  | -6.024615 | 3.731953  | -2.780581 |
| H  | -6.667639 | 4.622386  | -2.739536 |
| H  | -5.417468 | 3.787328  | -3.695227 |
| H  | -6.672842 | 2.848944  | -2.861926 |
| C  | -6.003690 | 3.563277  | -0.294029 |
| H  | -5.422784 | 3.274008  | 0.590183  |
| H  | -6.462481 | 4.544296  | -0.101913 |
| H  | -6.818275 | 2.836108  | -0.409913 |
| Na | 5.231361  | 0.867111  | -0.485442 |



|   |           |           |           |
|---|-----------|-----------|-----------|
| H | -0.803864 | 1.251104  | -4.463689 |
| H | -2.640244 | 0.582080  | -2.914601 |
| H | 0.415641  | 1.821313  | -3.005526 |
| O | 6.493573  | -0.632346 | -1.768084 |
| O | 5.803969  | -0.570099 | 1.319391  |
| C | 7.794185  | -1.044258 | -1.508760 |
| H | 8.492973  | -0.453682 | -2.141012 |
| H | 8.041082  | -0.859869 | -0.441783 |
| C | 5.904947  | -1.564634 | -2.617230 |
| H | 4.975498  | -1.944195 | -2.140963 |
| H | 5.632821  | -1.075041 | -3.576290 |
| C | 6.860995  | -2.716586 | -2.866428 |
| H | 6.359080  | -3.702130 | -2.750989 |
| H | 7.300819  | -2.635265 | -3.885201 |
| C | 7.921314  | -2.515096 | -1.831851 |
| H | 7.698041  | -3.126032 | -0.929596 |
| H | 8.932588  | -2.767125 | -2.218832 |
| C | 5.743259  | -0.188481 | 2.655810  |
| H | 6.658710  | 0.386578  | 2.910715  |
| H | 4.861675  | 0.468774  | 2.815604  |
| C | 5.282192  | -1.852810 | 1.250134  |
| H | 4.180532  | -1.795018 | 1.106946  |
| H | 5.721522  | -2.397245 | 0.389929  |
| C | 5.611215  | -2.557716 | 2.543275  |
| H | 6.616035  | -3.029709 | 2.469968  |
| H | 4.851783  | -3.325790 | 2.802563  |
| C | 5.642070  | -1.429339 | 3.531534  |
| H | 4.702990  | -1.407289 | 4.127574  |
| H | 6.515768  | -1.519328 | 4.213563  |
| O | 3.710012  | 0.746802  | -2.263507 |
| C | 3.507253  | 1.155186  | -3.573230 |
| H | 2.991383  | 2.141484  | -3.576024 |
| H | 4.487263  | 1.269112  | -4.083172 |
| C | 2.585876  | 0.015553  | -1.910229 |
| H | 2.855104  | -0.726396 | -1.131100 |
| H | 1.823949  | 0.700339  | -1.488713 |
| C | 2.660404  | 0.110499  | -4.278015 |
| H | 1.874789  | 0.590211  | -4.901870 |
| H | 3.296275  | -0.543496 | -4.914528 |
| C | 2.058390  | -0.680712 | -3.149383 |
| H | 0.948198  | -0.657728 | -3.183637 |
| H | 2.410313  | -1.735727 | -3.180563 |

178

Figure\_S6\_imid-3\_modeS2\_prod(CuHadd) / electronic energy: -3602.039215307438 a.u. / lowest freq: 15.90 cm<sup>-1</sup>

|    |           |           |           |
|----|-----------|-----------|-----------|
| C  | 1.044311  | 0.464708  | 3.148142  |
| H  | 1.852190  | -0.233865 | 3.405337  |
| C  | -0.263654 | -0.252914 | 2.748108  |
| H  | -1.106754 | 0.012840  | 3.404126  |
| C  | 0.494708  | 1.058131  | 0.927094  |
| C  | 2.598369  | 1.919377  | 1.734040  |
| C  | 2.479932  | 3.282741  | 1.435191  |
| C  | 3.875533  | 1.340509  | 1.823481  |
| C  | 3.612251  | 4.070412  | 1.250378  |
| H  | 1.478709  | 3.715584  | 1.351880  |
| C  | 5.005944  | 2.143510  | 1.648925  |
| C  | 4.879662  | 3.502042  | 1.370219  |
| H  | 3.500031  | 5.131697  | 1.019104  |
| H  | 5.988636  | 1.670744  | 1.701841  |
| H  | 5.773806  | 4.113979  | 1.233338  |
| C  | -1.616888 | -0.094460 | 0.576486  |
| C  | -2.858771 | -0.389546 | 1.165474  |
| C  | -1.458081 | -0.299635 | -0.806781 |
| C  | -3.904104 | -0.917449 | 0.396730  |
| C  | -2.489429 | -0.864230 | -1.568727 |
| C  | -3.714830 | -1.161801 | -0.966333 |
| H  | -4.509436 | -1.612753 | -1.549878 |
| S  | 4.118583  | -0.434120 | 2.015941  |
| O  | 5.502494  | -0.685131 | 1.521009  |
| O  | 3.107930  | -1.043714 | 1.103041  |
| O  | 3.935740  | -0.754980 | 3.444904  |
| Cu | 0.728062  | 2.116880  | -0.669576 |
| C  | 0.864465  | 1.451285  | 4.277403  |
| C  | 1.640923  | 1.342468  | 5.444711  |
| C  | -0.065867 | 2.501520  | 4.172670  |
| C  | 1.491084  | 2.268122  | 6.481942  |
| H  | 2.364106  | 0.544235  | 5.553479  |
| C  | -0.211572 | 3.425284  | 5.210802  |
| H  | -0.681415 | 2.599520  | 3.290213  |
| C  | 0.566931  | 3.309304  | 6.364655  |
| H  | 2.093149  | 2.178755  | 7.376912  |
| H  | -0.929315 | 4.230409  | 5.120644  |
| H  | 0.453154  | 4.025120  | 7.168418  |
| C  | -0.101538 | -1.755981 | 2.791335  |
| C  | -0.224889 | -2.413714 | 4.027990  |
| C  | 0.221987  | -2.515928 | 1.645557  |
| C  | -0.052357 | -3.797087 | 4.102898  |
| H  | -0.451804 | -1.855977 | 4.928247  |
| C  | 0.374644  | -3.848638 | 1.722354  |

|   |           |           |           |
|---|-----------|-----------|-----------|
| H | 0.363304  | -2.038725 | 0.686090  |
| C | 0.240372  | -4.517324 | 2.943493  |
| H | -0.150900 | -4.308162 | 5.051672  |
| H | 0.613371  | -4.412688 | 0.833018  |
| H | 0.370252  | -5.590708 | 2.990393  |
| N | 1.408476  | 1.167055  | 1.902982  |
| N | -0.506665 | 0.284151  | 1.383420  |
| H | -0.513081 | -0.084430 | -1.277285 |
| H | -3.015450 | -0.235181 | 2.224273  |
| C | -2.255806 | -1.267093 | -2.971590 |
| C | -2.574971 | -0.376398 | -4.034010 |
| C | -1.828034 | -2.595587 | -3.260579 |
| C | -2.500896 | -0.844780 | -5.358981 |
| C | -1.763489 | -3.011167 | -4.603188 |
| C | -2.095127 | -2.144176 | -5.636747 |
| H | -2.770118 | -0.206189 | -6.189334 |
| H | -1.474471 | -4.021687 | -4.858153 |
| H | -2.047739 | -2.486059 | -6.662743 |
| C | -5.179963 | -1.290656 | 1.037889  |
| C | -5.280834 | -2.516963 | 1.754246  |
| C | -6.309366 | -0.431118 | 0.931626  |
| C | -6.502308 | -2.843153 | 2.371720  |
| C | -7.513737 | -0.813324 | 1.550438  |
| C | -7.603747 | -2.001282 | 2.267051  |
| H | -6.610657 | -3.762096 | 2.932580  |
| H | -8.393479 | -0.186996 | 1.483039  |
| H | -8.537460 | -2.274486 | 2.741777  |
| C | -6.256842 | 0.891552  | 0.167320  |
| H | -5.244722 | 1.073755  | -0.243950 |
| C | -6.557969 | 2.079966  | 1.089177  |
| H | -5.839440 | 2.092683  | 1.936578  |
| H | -6.451556 | 3.032803  | 0.528835  |
| H | -7.590998 | 2.030109  | 1.492186  |
| C | -7.207017 | 0.870914  | -1.035510 |
| H | -6.979979 | -0.003211 | -1.682693 |
| H | -8.267131 | 0.812293  | -0.710440 |
| H | -7.073544 | 1.793168  | -1.640798 |
| C | -4.111969 | -3.498192 | 1.861488  |
| H | -3.232714 | -3.143585 | 1.286008  |
| C | -4.474709 | -4.864061 | 1.264748  |
| H | -3.573416 | -5.512886 | 1.227824  |
| H | -5.250156 | -5.378106 | 1.870460  |
| H | -4.853843 | -4.737597 | 0.228470  |
| C | -3.646364 | -3.639421 | 3.314646  |
| H | -2.777189 | -4.327507 | 3.368417  |
| H | -3.333173 | -2.649153 | 3.709408  |
| H | -4.452985 | -4.046445 | 3.959788  |
| C | -1.495955 | -3.602857 | -2.158076 |
| H | -1.462972 | -3.109551 | -1.165189 |
| C | -3.025674 | 1.060031  | -3.780356 |
| H | -2.899567 | 1.327421  | -2.711901 |
| C | -2.175769 | 2.063349  | -4.573526 |
| H | -1.098142 | 1.888501  | -4.373972 |
| H | -2.356144 | 1.980818  | -5.665156 |
| H | -2.425386 | 3.100087  | -4.270409 |
| C | -4.514141 | 1.226697  | -4.100761 |
| H | -4.712926 | 1.046692  | -5.178621 |
| H | -5.112571 | 0.509050  | -3.499879 |
| H | -4.846455 | 2.255172  | -3.843083 |
| C | -0.110490 | -4.233925 | -2.355965 |
| H | -0.075899 | -4.875277 | -3.260510 |
| H | 0.660323  | -3.443479 | -2.448522 |
| H | 0.144202  | -4.868324 | -1.482196 |
| C | -2.578548 | -4.683464 | -2.074343 |
| H | -3.571900 | -4.212309 | -1.915747 |
| H | -2.612955 | -5.286902 | -3.006225 |
| H | -2.375019 | -5.361615 | -1.218197 |
| C | 0.950195  | 3.356820  | -2.203793 |
| C | 2.268733  | 4.099888  | -2.242492 |
| H | 2.388786  | 4.754911  | -1.364386 |
| B | -0.285349 | 4.020610  | -1.632731 |
| O | -0.293944 | 5.142155  | -0.788459 |
| O | -1.586198 | 3.513701  | -1.766467 |
| C | -1.557421 | 5.154239  | -0.104240 |
| C | -2.492843 | 4.406124  | -1.110566 |
| C | -1.379945 | 4.374784  | 1.189895  |
| H | -0.584406 | 4.835670  | 1.793032  |
| H | -2.294163 | 4.352526  | 1.800065  |
| H | -1.082978 | 3.336385  | 0.970360  |
| C | -1.957768 | 6.584007  | 0.189330  |
| H | -2.964022 | 6.628638  | 0.631621  |
| H | -1.258435 | 7.035968  | 0.906277  |
| H | -1.952808 | 7.201309  | -0.717275 |
| C | -3.083353 | 5.338859  | -2.158380 |
| H | -3.821499 | 6.029403  | -1.725964 |
| H | -2.302541 | 5.934902  | -2.651102 |
| H | -3.593601 | 4.748373  | -2.930684 |
| C | -3.592585 | 3.589884  | -0.462176 |

|    |           |           |           |
|----|-----------|-----------|-----------|
| H  | -3.185848 | 2.785914  | 0.165444  |
| H  | -4.244349 | 4.220208  | 0.160415  |
| H  | -4.218449 | 3.122759  | -1.234786 |
| Na | 4.812813  | -1.598540 | -0.559030 |
| H  | 2.378192  | 4.757915  | -3.126305 |
| H  | 0.756402  | 2.756744  | -3.106827 |
| H  | 3.153320  | 3.439892  | -2.247305 |
| O  | 3.269996  | -1.535218 | -2.338973 |
| O  | 4.462984  | -3.851258 | -0.139921 |
| C  | 3.331589  | -1.837687 | -3.695015 |
| H  | 4.224856  | -1.342709 | -4.131518 |
| H  | 3.437707  | -2.934736 | -3.829543 |
| C  | 2.140874  | -0.755433 | -2.116445 |
| H  | 1.398336  | -1.363794 | -1.560459 |
| H  | 2.406722  | 0.124939  | -1.494839 |
| C  | 1.566206  | -0.308565 | -3.444181 |
| H  | 0.457008  | -0.275847 | -3.436748 |
| H  | 1.970403  | 0.689800  | -3.717793 |
| C  | 2.080413  | -1.341700 | -4.389528 |
| H  | 1.342870  | -2.168307 | -4.491144 |
| H  | 2.303970  | -0.910676 | -5.389597 |
| C  | 4.359518  | -4.310796 | 1.166997  |
| H  | 5.370720  | -4.357717 | 1.623829  |
| H  | 3.737954  | -3.604477 | 1.760094  |
| C  | 3.434531  | -4.455443 | -0.847273 |
| H  | 2.520877  | -3.825134 | -0.775981 |
| H  | 3.719147  | -4.550014 | -1.916016 |
| C  | 3.184194  | -5.821468 | -0.245062 |
| H  | 3.755438  | -6.595862 | -0.803164 |
| H  | 2.102864  | -6.077389 | -0.252750 |
| C  | 3.718658  | -5.687997 | 1.153889  |
| H  | 2.900409  | -5.749525 | 1.904065  |
| H  | 4.474086  | -6.477501 | 1.361525  |
| O  | 6.087960  | 0.092711  | -1.617945 |
| C  | 6.822950  | -0.115525 | -2.779791 |
| H  | 7.907324  | -0.038268 | -2.547845 |
| H  | 6.619026  | -1.140792 | -3.155453 |
| C  | 5.511386  | 1.351334  | -1.711647 |
| H  | 4.531839  | 1.355364  | -1.190197 |
| H  | 6.176877  | 2.097265  | -1.223314 |
| C  | 6.431062  | 0.912087  | -3.829629 |
| H  | 7.292318  | 1.578553  | -4.056855 |
| H  | 6.077345  | 0.427542  | -4.765954 |
| C  | 5.332100  | 1.688449  | -3.172320 |
| H  | 5.425564  | 2.780619  | -3.357276 |
| H  | 4.343246  | 1.325587  | -3.526977 |

178

Figure\_S6\_imid-3\_modeR1\_ed(CuHadd) / electronic energy: -3601.999343742906 a.u. / lowest freq: 12.74 cm-1

|    |           |           |           |
|----|-----------|-----------|-----------|
| C  | -1.685432 | -1.721243 | -1.211437 |
| H  | -2.363758 | -1.403489 | -0.407043 |
| C  | -0.319000 | -2.210852 | -0.686159 |
| H  | 0.039626  | -3.105868 | -1.222890 |
| C  | -0.014168 | -0.159121 | -1.829565 |
| C  | -2.242380 | 0.334507  | -2.638014 |
| C  | -2.400295 | 0.205144  | -4.020267 |
| C  | -2.997518 | 1.300222  | -1.948561 |
| C  | -3.285210 | 1.024180  | -4.717310 |
| H  | -1.800534 | -0.538391 | -4.545749 |
| C  | -3.868555 | 2.130770  | -2.655753 |
| C  | -4.015376 | 1.993966  | -4.034736 |
| H  | -3.394085 | 0.908502  | -5.797715 |
| H  | -4.430224 | 2.883956  | -2.100263 |
| H  | -4.702774 | 2.648947  | -4.574854 |
| C  | 1.896092  | -0.953087 | -0.574300 |
| C  | 2.760723  | -2.057145 | -0.619165 |
| C  | 2.335467  | 0.239411  | 0.025214  |
| C  | 4.049439  | -1.967079 | -0.078238 |
| C  | 3.627337  | 0.331132  | 0.565782  |
| C  | 4.479593  | -0.776028 | 0.514315  |
| H  | 5.464175  | -0.722849 | 0.963455  |
| S  | -2.892544 | 1.506102  | -0.162057 |
| O  | -3.350970 | 0.201533  | 0.417201  |
| O  | -3.875410 | 2.574713  | 0.167070  |
| O  | -1.483900 | 1.818420  | 0.128503  |
| Cu | 0.822218  | 1.093016  | -3.106652 |
| C  | -2.380486 | -2.727458 | -2.093648 |
| C  | -3.641138 | -3.231831 | -1.729072 |
| C  | -1.788921 | -3.166998 | -3.292431 |
| C  | -4.298183 | -4.152885 | -2.549445 |
| H  | -4.117867 | -2.912816 | -0.811846 |
| C  | -2.450859 | -4.086694 | -4.110820 |
| H  | -0.819686 | -2.791051 | -3.595843 |
| C  | -3.704778 | -4.578659 | -3.740127 |
| H  | -5.268943 | -4.535400 | -2.262473 |
| H  | -1.991868 | -4.417072 | -5.033588 |
| H  | -4.216224 | -5.290366 | -4.375118 |
| C  | -0.346013 | -2.501291 | 0.794620  |
| C  | -0.168744 | -3.817065 | 1.257116  |

|   |           |           |           |
|---|-----------|-----------|-----------|
| C | -0.577936 | -1.474353 | 1.728821  |
| C | -0.236124 | -4.100811 | 2.623907  |
| H | 0.009326  | -4.626850 | 0.560690  |
| C | -0.646714 | -1.764950 | 3.093824  |
| H | -0.716904 | -0.453154 | 1.400052  |
| C | -0.474013 | -3.075869 | 3.541510  |
| H | -0.107113 | -5.117589 | 2.971439  |
| H | -0.855680 | -0.978258 | 3.804711  |
| H | -0.532375 | -3.298617 | 4.598900  |
| N | -1.308067 | -0.505038 | -1.967302 |
| N | 0.558408  | -1.071480 | -1.025405 |
| H | 1.654007  | 1.075230  | 0.120428  |
| H | 2.431203  | -2.989010 | -1.061255 |
| C | 4.051833  | 1.549126  | 1.289144  |
| C | 4.973606  | 2.459948  | 0.693618  |
| C | 3.575337  | 1.784043  | 2.610756  |
| C | 5.358395  | 3.604714  | 1.415562  |
| C | 3.958487  | 2.966167  | 3.270610  |
| C | 4.834859  | 3.865268  | 2.675922  |
| H | 6.071043  | 4.306388  | 1.003659  |
| H | 3.601323  | 3.184011  | 4.268411  |
| H | 5.132636  | 4.759331  | 3.208566  |
| C | 4.942968  | -3.139020 | -0.086381 |
| C | 4.979016  | -4.008460 | 1.039439  |
| C | 5.806665  | -3.365217 | -1.193643 |
| C | 5.887094  | -5.083164 | 1.036394  |
| C | 6.685602  | -4.462991 | -1.154640 |
| C | 6.724216  | -5.308601 | -0.051165 |
| H | 5.954730  | -5.752896 | 1.883414  |
| H | 7.357499  | -4.662821 | -1.978951 |
| H | 7.414231  | -6.142540 | -0.035796 |
| C | 5.825254  | -2.441432 | -2.411878 |
| H | 5.079522  | -1.627059 | -2.309585 |
| C | 5.448373  | -3.200686 | -3.689800 |
| H | 4.463077  | -3.697250 | -3.558472 |
| H | 5.368615  | -2.492840 | -4.542439 |
| H | 6.208339  | -3.969433 | -3.943042 |
| C | 7.186844  | -1.751589 | -2.558819 |
| H | 7.444348  | -1.218621 | -1.618651 |
| H | 7.988375  | -2.485273 | -2.787199 |
| H | 7.148287  | -1.004708 | -3.380457 |
| C | 4.081434  | -3.795674 | 2.260047  |
| H | 3.372709  | -2.957999 | 2.097129  |
| C | 4.914015  | -3.418611 | 3.490338  |
| H | 4.244851  | -3.182937 | 4.345519  |
| H | 5.589939  | -4.248273 | 3.787108  |
| H | 5.524810  | -2.516462 | 3.271582  |
| C | 3.210916  | -5.027286 | 2.539064  |
| H | 2.507943  | -4.811846 | 3.371432  |
| H | 2.615722  | -5.283257 | 1.636522  |
| H | 3.826117  | -5.904993 | 2.826857  |
| C | 2.717679  | 0.764474  | 3.364109  |
| H | 2.535772  | -0.143002 | 2.753484  |
| C | 5.598649  | 2.210057  | -0.679375 |
| H | 5.073423  | 1.386018  | -1.203875 |
| C | 5.493494  | 3.439110  | -1.597769 |
| H | 4.473998  | 3.872527  | -1.559225 |
| H | 6.218658  | 4.227793  | -1.306559 |
| H | 5.708990  | 3.144947  | -2.647226 |
| C | 7.061574  | 1.777380  | -0.530554 |
| H | 7.668672  | 2.582313  | -0.063919 |
| H | 7.130264  | 0.868403  | 0.103021  |
| H | 7.491670  | 1.538172  | -1.526677 |
| C | 1.337862  | 1.338486  | 3.698424  |
| H | 1.414042  | 2.290514  | 4.263446  |
| H | 0.775628  | 1.513887  | 2.758568  |
| H | 0.763145  | 0.620081  | 4.317014  |
| C | 3.431753  | 0.269896  | 4.628755  |
| H | 4.440711  | -0.116073 | 4.368284  |
| H | 3.537287  | 1.082469  | 5.377881  |
| H | 2.855073  | -0.560045 | 5.090795  |
| C | 2.039018  | 2.617164  | -2.462092 |
| C | 1.886706  | 2.592485  | -3.860652 |
| H | 2.670503  | 2.194504  | -4.512497 |
| B | 1.333912  | 3.609038  | -1.524446 |
| O | 1.922148  | 4.064002  | -0.367873 |
| O | 0.125770  | 4.209321  | -1.779365 |
| C | 0.998250  | 4.951334  | 0.297483  |
| C | -0.035763 | 5.298248  | -0.842274 |
| C | 0.389023  | 4.182877  | 1.454276  |
| H | 1.199788  | 3.843480  | 2.112530  |
| H | -0.281603 | 4.816545  | 2.051561  |
| H | -0.175579 | 3.309764  | 1.105685  |
| C | 1.779505  | 6.139791  | 0.822124  |
| H | 1.110151  | 6.877660  | 1.288032  |
| H | 2.491531  | 5.804684  | 1.589265  |
| H | 2.353417  | 6.643473  | 0.034972  |
| C | 0.318247  | 6.571915  | -1.593514 |

|    |           |           |           |
|----|-----------|-----------|-----------|
| H  | 0.196381  | 7.467004  | -0.967648 |
| H  | 1.354408  | 6.547648  | -1.959405 |
| H  | -0.340812 | 6.676157  | -2.466060 |
| C  | -1.477642 | 5.326767  | -0.382606 |
| H  | -1.791103 | 4.352380  | 0.009916  |
| H  | -1.629230 | 6.091102  | 0.394064  |
| H  | -2.136849 | 5.574468  | -1.226969 |
| Na | -5.320806 | 0.694272  | 1.429657  |
| H  | 1.193301  | 3.284158  | -4.354299 |
| H  | 2.924211  | 2.104671  | -2.068456 |
| H  | 0.525843  | 0.364271  | -4.493917 |
| O  | -6.631401 | -0.342599 | -0.268460 |
| O  | -4.513517 | 1.745794  | 3.380312  |
| C  | -4.420791 | 3.125430  | 3.503216  |
| H  | -4.981673 | 3.610273  | 2.676445  |
| H  | -4.879437 | 3.437285  | 4.467625  |
| C  | -3.322540 | 1.219265  | 3.861974  |
| H  | -3.443184 | 0.960578  | 4.937121  |
| H  | -3.072165 | 0.294793  | 3.303196  |
| C  | -2.221370 | 2.244419  | 3.685310  |
| H  | -1.602662 | 1.993024  | 2.799057  |
| H  | -1.574419 | 2.296478  | 4.588062  |
| C  | -2.960348 | 3.532386  | 3.461173  |
| H  | -2.731052 | 4.273174  | 4.258082  |
| H  | -2.704088 | 3.965089  | 2.469963  |
| C  | -7.141678 | -1.621132 | -0.096393 |
| H  | -7.957741 | -1.600031 | 0.656380  |
| H  | -6.336599 | -2.292766 | 0.272378  |
| C  | -6.159243 | -0.282825 | -1.572863 |
| H  | -6.267035 | 0.752928  | -1.957006 |
| H  | -5.083804 | -0.561150 | -1.587015 |
| C  | -6.955156 | -1.248136 | -2.430815 |
| H  | -7.689762 | -0.699580 | -3.060626 |
| H  | -6.280927 | -1.847283 | -3.081400 |
| C  | -7.663113 | -2.116904 | -1.429372 |
| H  | -8.763118 | -1.964654 | -1.494170 |
| H  | -7.424328 | -3.192482 | -1.578205 |
| O  | -5.205856 | -1.353000 | 2.651990  |
| C  | -4.204421 | -2.305499 | 2.522765  |
| H  | -3.677091 | -2.172676 | 1.556913  |
| H  | -3.470237 | -2.179796 | 3.348359  |
| C  | -6.176880 | -1.920156 | 3.464191  |
| H  | -5.958765 | -1.671488 | 4.526810  |
| H  | -7.171611 | -1.501851 | 3.201724  |
| C  | -4.836045 | -3.680290 | 2.594547  |
| H  | -4.985252 | -4.092253 | 1.572019  |
| H  | -4.207536 | -4.377618 | 3.190562  |
| C  | -6.161751 | -3.423888 | 3.257714  |
| H  | -6.239473 | -3.958928 | 4.229360  |
| H  | -6.996201 | -3.735152 | 2.591202  |

178

Figure\_S6\_imid-3\_modeR1\_ts(CuHadd)\_01 / electronic energy: -3601.981935926706 a.u. / lowest freq: -707.75 cm<sup>-1</sup>

|    |           |           |           |
|----|-----------|-----------|-----------|
| C  | 0.957383  | -2.098930 | 1.838215  |
| H  | 1.795639  | -1.966931 | 1.137686  |
| C  | -0.379061 | -2.397840 | 1.122489  |
| H  | -0.971626 | -3.173417 | 1.637625  |
| C  | -0.482378 | -0.236417 | 2.084400  |
| C  | 1.623328  | -0.072809 | 3.264688  |
| C  | 1.426003  | -0.034859 | 4.647421  |
| C  | 2.717957  | 0.613460  | 2.708621  |
| C  | 2.298920  | 0.667540  | 5.474517  |
| H  | 0.563784  | -0.559879 | 5.062717  |
| C  | 3.588965  | 1.316084  | 3.542333  |
| C  | 3.383601  | 1.343377  | 4.920026  |
| H  | 2.127707  | 0.687171  | 6.552895  |
| H  | 4.422424  | 1.852892  | 3.086018  |
| H  | 4.071252  | 1.900854  | 5.559881  |
| C  | -2.254070 | -0.768260 | 0.523877  |
| C  | -3.274545 | -1.715418 | 0.346258  |
| C  | -2.351671 | 0.476209  | -0.124088 |
| C  | -4.373069 | -1.425362 | -0.472562 |
| C  | -3.441619 | 0.758999  | -0.959944 |
| C  | -4.449614 | -0.194676 | -1.131229 |
| H  | -5.275986 | 0.005364  | -1.802533 |
| S  | 3.001710  | 0.668584  | 0.935037  |
| O  | 3.339839  | -0.737096 | 0.533592  |
| O  | 4.200786  | 1.534111  | 0.738012  |
| O  | 1.754750  | 1.174959  | 0.340299  |
| Cu | -1.202993 | 1.307368  | 2.928331  |
| C  | 1.323681  | -3.130470 | 2.875469  |
| C  | 2.539750  | -3.828588 | 2.776002  |
| C  | 0.471837  | -3.393298 | 3.964731  |
| C  | 2.890692  | -4.778480 | 3.739393  |
| H  | 3.219763  | -3.634992 | 1.957404  |
| C  | 0.827722  | -4.342869 | 4.926732  |
| H  | -0.464363 | -2.859404 | 4.070671  |
| C  | 2.035191  | -5.036286 | 4.813302  |
| H  | 3.828121  | -5.312827 | 3.654473  |

|   |           |           |           |
|---|-----------|-----------|-----------|
| H | 0.167660  | -4.539950 | 5.761496  |
| H | 2.309334  | -5.771115 | 5.559122  |
| C | -0.171791 | -2.813181 | -0.313705 |
| C | -0.452865 | -4.131726 | -0.712186 |
| C | 0.332163  | -1.905014 | -1.263368 |
| C | -0.224188 | -4.535341 | -2.030429 |
| H | -0.836734 | -4.852295 | -0.000980 |
| C | 0.557693  | -2.314546 | -2.580497 |
| H | 0.554076  | -0.884236 | -0.981625 |
| C | 0.277771  | -3.627050 | -2.964456 |
| H | -0.436588 | -5.553917 | -2.328099 |
| H | 0.966614  | -1.621290 | -3.301141 |
| H | 0.457163  | -3.942556 | -3.983919 |
| N | 0.688668  | -0.786115 | 2.462970  |
| N | -1.083236 | -1.104576 | 1.248859  |
| H | -1.546477 | 1.193908  | -0.036527 |
| H | -3.210754 | -2.681503 | 0.831275  |
| C | -3.470651 | 2.003535  | -1.757098 |
| C | -4.339554 | 3.073310  | -1.392237 |
| C | -2.682359 | 2.099286  | -2.940652 |
| C | -4.377883 | 4.222693  | -2.202776 |
| C | -2.732448 | 3.286491  | -3.694448 |
| C | -3.566685 | 4.334199  | -3.325120 |
| H | -5.043511 | 5.043020  | -1.971126 |
| H | -2.143567 | 3.395854  | -4.595443 |
| H | -3.603679 | 5.231613  | -3.929294 |
| C | -5.434470 | -2.427851 | -0.678419 |
| C | -5.394624 | -3.278598 | -1.818478 |
| C | -6.526254 | -2.501072 | 0.230827  |
| C | -6.456136 | -4.177450 | -2.030649 |
| C | -7.553076 | -3.430616 | -0.015716 |
| C | -7.517107 | -4.255022 | -1.134986 |
| H | -6.468696 | -4.824404 | -2.897715 |
| H | -8.398150 | -3.511888 | 0.655184  |
| H | -8.322323 | -4.956168 | -1.313413 |
| C | -6.630686 | -1.586599 | 1.451838  |
| H | -5.756321 | -0.908293 | 1.521715  |
| C | -6.641125 | -2.398357 | 2.752785  |
| H | -5.743765 | -3.052073 | 2.798227  |
| H | -6.615779 | -1.714026 | 3.627681  |
| H | -7.551109 | -3.029937 | 2.828436  |
| C | -7.862251 | -0.677823 | 1.356230  |
| H | -7.839720 | -0.109038 | 0.402131  |
| H | -8.802803 | -1.266132 | 1.402045  |
| H | -7.862459 | 0.051913  | 2.194015  |
| C | -4.247757 | -3.230391 | -2.829478 |
| H | -3.447586 | -2.537918 | -2.496328 |
| C | -4.736895 | -2.704596 | -4.183329 |
| H | -3.879608 | -2.595006 | -4.881623 |
| H | -5.478284 | -3.395372 | -4.637758 |
| H | -5.207246 | -1.706287 | -4.053954 |
| C | -3.574833 | -4.600333 | -2.981474 |
| H | -2.683258 | -4.512246 | -3.637984 |
| H | -3.243366 | -4.972151 | -1.988459 |
| H | -4.262392 | -5.344878 | -3.433796 |
| C | -1.841147 | 0.930865  | -3.463175 |
| H | -1.914272 | 0.047670  | -2.797276 |
| C | -5.269200 | 2.991617  | -0.180956 |
| H | -4.978002 | 2.144918  | 0.474761  |
| C | -5.196935 | 4.253342  | 0.694987  |
| H | -4.143742 | 4.557343  | 0.856375  |
| H | -5.738508 | 5.103916  | 0.230246  |
| H | -5.659681 | 4.052411  | 1.684887  |
| C | -6.712804 | 2.737772  | -0.629567 |
| H | -7.089807 | 3.580566  | -1.247581 |
| H | -6.772311 | 1.805552  | -1.228386 |
| H | -7.372696 | 2.621561  | 0.256719  |
| C | -0.352739 | 1.293996  | -3.527808 |
| H | -0.180383 | 2.216820  | -4.118930 |
| H | 0.043841  | 1.437903  | -2.502121 |
| H | 0.223895  | 0.474877  | -4.002806 |
| C | -2.351401 | 0.458539  | -4.830513 |
| H | -3.437143 | 0.230037  | -4.772024 |
| H | -2.186413 | 1.230318  | -5.611490 |
| H | -1.820386 | -0.468917 | -5.135031 |
| C | -2.172262 | 3.090333  | 2.587607  |
| C | -2.011049 | 2.801748  | 3.994160  |
| H | -2.909319 | 2.662943  | 4.604891  |
| B | -1.163861 | 3.839373  | 1.749253  |
| O | -1.450345 | 4.419240  | 0.519850  |
| O | 0.148162  | 4.099242  | 2.137521  |
| C | -0.230013 | 4.940782  | -0.028681 |
| C | 0.683912  | 5.088243  | 1.241274  |
| C | 0.298616  | 3.925741  | -1.024089 |
| H | -0.477864 | 3.738485  | -1.777330 |
| H | 1.188748  | 4.302118  | -1.547533 |
| H | 0.558829  | 2.974626  | -0.541736 |
| C | -0.537504 | 6.245464  | -0.736934 |

|    |           |           |           |
|----|-----------|-----------|-----------|
| H  | 0.383658  | 6.724403  | -1.101123 |
| H  | -1.181681 | 6.055235  | -1.607063 |
| H  | -1.061079 | 6.955994  | -0.085228 |
| C  | 0.525376  | 6.442069  | 1.917957  |
| H  | 0.954488  | 7.257773  | 1.318608  |
| H  | -0.532891 | 6.674045  | 2.105049  |
| H  | 1.040878  | 6.428550  | 2.888165  |
| C  | 2.146541  | 4.781513  | 0.993752  |
| H  | 2.287736  | 3.746557  | 0.659182  |
| H  | 2.570604  | 5.458528  | 0.236824  |
| H  | 2.723813  | 4.915932  | 1.920054  |
| Na | 5.344813  | -0.315751 | -0.495994 |
| H  | -1.232052 | 3.348133  | 4.540919  |
| H  | -3.149194 | 2.845935  | 2.157024  |
| H  | -1.471659 | 1.305030  | 4.508570  |
| O  | 7.566037  | -0.286965 | -1.134526 |
| O  | 4.644674  | 0.487472  | -2.620766 |
| C  | 5.394798  | 1.577851  | -3.053820 |
| H  | 6.130560  | 1.844254  | -2.266741 |
| H  | 5.952889  | 1.301236  | -3.974381 |
| C  | 3.309871  | 0.785874  | -2.861250 |
| H  | 3.016518  | 0.380414  | -3.855025 |
| H  | 2.669057  | 0.315221  | -2.089019 |
| C  | 3.146306  | 2.285333  | -2.839693 |
| H  | 2.973918  | 2.629369  | -1.797234 |
| H  | 2.319847  | 2.624837  | -3.499857 |
| C  | 4.480169  | 2.762475  | -3.319677 |
| H  | 4.441088  | 2.981039  | -4.409839 |
| H  | 4.808207  | 3.669813  | -2.766637 |
| C  | 7.947497  | -1.022254 | -2.252501 |
| H  | 7.072064  | -1.136981 | -2.926419 |
| H  | 8.277754  | -2.034430 | -1.932592 |
| C  | 8.567367  | 0.639293  | -0.885326 |
| H  | 8.126475  | 1.559692  | -0.447092 |
| H  | 9.291426  | 0.209873  | -0.157731 |
| C  | 9.260788  | 0.955745  | -2.189370 |
| H  | 8.751974  | 1.806965  | -2.693667 |
| H  | 10.336059 | 1.192879  | -2.036075 |
| C  | 9.070477  | -0.302048 | -2.981929 |
| H  | 8.793293  | -0.074523 | -4.034722 |
| H  | 9.998186  | -0.915702 | -2.964099 |
| O  | 5.322683  | -2.569564 | -1.315534 |
| C  | 4.130791  | -2.889944 | -1.958466 |
| H  | 3.439601  | -2.024464 | -1.919941 |
| H  | 4.348661  | -3.117162 | -3.024456 |
| C  | 5.605511  | -3.577614 | -0.400248 |
| H  | 6.659239  | -3.907321 | -0.521717 |
| H  | 5.480005  | -3.173392 | 0.627355  |
| C  | 3.498399  | -4.093795 | -1.293455 |
| H  | 2.750451  | -3.764670 | -0.539299 |
| H  | 3.018575  | -4.772473 | -2.031539 |
| C  | 4.660524  | -4.740250 | -0.616064 |
| H  | 5.127175  | -5.489827 | -1.293115 |
| H  | 4.367980  | -5.223847 | 0.341101  |

178

Figure\_S6\_imid-3\_modeR1\_ts(CuHadd)\_02 / electronic energy: -3601.984095306953 a.u. / lowest freq: -688.94 cm-1

|    |           |           |           |
|----|-----------|-----------|-----------|
| C  | -1.642819 | -1.727056 | -1.257804 |
| H  | -2.314308 | -1.420387 | -0.442231 |
| C  | -0.267495 | -2.213585 | -0.752316 |
| H  | 0.091921  | -3.101111 | -1.301069 |
| C  | 0.006684  | -0.135007 | -1.856079 |
| C  | -2.224793 | 0.313879  | -2.690072 |
| C  | -2.309140 | 0.227080  | -4.082361 |
| C  | -3.056884 | 1.215745  | -2.006245 |
| C  | -3.208201 | 1.017107  | -4.794155 |
| H  | -1.642954 | -0.464854 | -4.600814 |
| C  | -3.945603 | 2.016183  | -2.726752 |
| C  | -4.027584 | 1.914783  | -4.113645 |
| H  | -3.260474 | 0.935022  | -5.881782 |
| H  | -4.566666 | 2.724713  | -2.176074 |
| H  | -4.729928 | 2.545661  | -4.663043 |
| C  | 1.938445  | -0.937856 | -0.636140 |
| C  | 2.800064  | -2.045375 | -0.669276 |
| C  | 2.383942  | 0.261679  | -0.052538 |
| C  | 4.085670  | -1.957932 | -0.121594 |
| C  | 3.664412  | 0.342227  | 0.515060  |
| C  | 4.511862  | -0.769201 | 0.477429  |
| H  | 5.488042  | -0.722384 | 0.945180  |
| S  | -2.999532 | 1.406014  | -0.217366 |
| O  | -3.456384 | 0.094548  | 0.346727  |
| O  | -4.000111 | 2.464001  | 0.092038  |
| O  | -1.602888 | 1.729278  | 0.111294  |
| Cu | 0.737827  | 1.313439  | -2.857935 |
| C  | -2.346201 | -2.729563 | -2.137669 |
| C  | -3.603223 | -3.236407 | -1.763168 |
| C  | -1.768518 | -3.158942 | -3.346852 |
| C  | -4.269894 | -4.150051 | -2.584155 |
| H  | -4.069536 | -2.925385 | -0.837532 |

|   |           |           |           |
|---|-----------|-----------|-----------|
| C | -2.439880 | -4.071710 | -4.165297 |
| H | -0.802650 | -2.780790 | -3.658016 |
| C | -3.689872 | -4.566172 | -3.784820 |
| H | -5.237480 | -4.534866 | -2.289758 |
| H | -1.991371 | -4.394578 | -5.095850 |
| H | -4.208665 | -5.272386 | -4.419990 |
| C | -0.285345 | -2.519125 | 0.725650  |
| C | -0.105887 | -3.838767 | 1.175480  |
| C | -0.517128 | -1.501294 | 1.669711  |
| C | -0.171424 | -4.134956 | 2.539903  |
| H | 0.071244  | -4.641793 | 0.471069  |
| C | -0.583659 | -1.803736 | 3.031956  |
| H | -0.658532 | -0.477931 | 1.349757  |
| C | -0.409212 | -3.118569 | 3.467337  |
| H | -0.040880 | -5.154714 | 2.878016  |
| H | -0.791741 | -1.022614 | 3.749637  |
| H | -0.465741 | -3.351009 | 4.522734  |
| N | -1.281651 | -0.506037 | -2.009829 |
| N | 0.598546  | -1.062275 | -1.080679 |
| H | 1.714304  | 1.108347  | 0.021094  |
| H | 2.470703  | -2.978563 | -1.108615 |
| C | 4.075715  | 1.546444  | 1.266402  |
| C | 4.958210  | 2.497398  | 0.676425  |
| C | 3.643895  | 1.715252  | 2.613453  |
| C | 5.363118  | 3.609587  | 1.437724  |
| C | 4.045950  | 2.866708  | 3.315085  |
| C | 4.891217  | 3.801766  | 2.730574  |
| H | 6.054108  | 4.336979  | 1.034319  |
| H | 3.727862  | 3.032362  | 4.335869  |
| H | 5.204762  | 4.670805  | 3.294664  |
| C | 4.980150  | -3.129757 | -0.133423 |
| C | 5.026156  | -3.997913 | 0.993117  |
| C | 5.829160  | -3.362312 | -1.251005 |
| C | 5.927220  | -5.078491 | 0.979416  |
| C | 6.701331  | -4.465791 | -1.222121 |
| C | 6.748777  | -5.310440 | -0.118425 |
| H | 6.000502  | -5.748683 | 1.825626  |
| H | 7.360485  | -4.671519 | -2.055224 |
| H | 7.433132  | -6.149143 | -0.111257 |
| C | 5.837844  | -2.441051 | -2.471350 |
| H | 5.104811  | -1.616813 | -2.357564 |
| C | 5.428779  | -3.198795 | -3.740184 |
| H | 4.438864  | -3.680825 | -3.590589 |
| H | 5.344730  | -2.492665 | -4.593831 |
| H | 6.173402  | -3.979241 | -4.003155 |
| C | 7.204975  | -1.768217 | -2.644882 |
| H | 7.486894  | -1.237014 | -1.710745 |
| H | 7.993132  | -2.511697 | -2.887539 |
| H | 7.160055  | -1.022105 | -3.466899 |
| C | 4.144372  | -3.780860 | 2.224050  |
| H | 3.443730  | -2.934226 | 2.072803  |
| C | 4.994515  | -3.420712 | 3.447426  |
| H | 4.337307  | -3.178857 | 4.310012  |
| H | 5.660844  | -4.261228 | 3.735076  |
| H | 5.617011  | -2.527463 | 3.225650  |
| C | 3.263971  | -5.004647 | 2.505890  |
| H | 2.570406  | -4.785383 | 3.345187  |
| H | 2.658916  | -5.251410 | 1.607404  |
| H | 3.873025  | -5.889597 | 2.784610  |
| C | 2.814092  | 0.657469  | 3.346309  |
| H | 2.603838  | -0.215709 | 2.696055  |
| C | 5.526790  | 2.312860  | -0.730901 |
| H | 4.937037  | 1.555520  | -1.288308 |
| C | 5.460584  | 3.602896  | -1.565984 |
| H | 4.471888  | 4.091351  | -1.456621 |
| H | 6.244222  | 4.327404  | -1.259738 |
| H | 5.617048  | 3.364940  | -2.639876 |
| C | 6.969263  | 1.799840  | -0.659659 |
| H | 7.627729  | 2.540128  | -0.156738 |
| H | 7.011895  | 0.846462  | -0.093685 |
| H | 7.358441  | 1.611247  | -1.683109 |
| C | 1.448419  | 1.209597  | 3.770682  |
| H | 1.546942  | 2.143533  | 4.361661  |
| H | 0.830598  | 1.410263  | 2.871173  |
| H | 0.912372  | 0.465902  | 4.394983  |
| C | 3.580804  | 0.098360  | 4.551790  |
| H | 4.580375  | -0.265044 | 4.230538  |
| H | 3.712920  | 0.869596  | 5.339469  |
| H | 3.027103  | -0.759604 | 4.990077  |
| C | 1.932796  | 2.987483  | -2.740432 |
| C | 1.409817  | 2.763268  | -4.068242 |
| H | 2.115764  | 2.566824  | -4.882039 |
| B | 1.287456  | 3.839161  | -1.671501 |
| O | 1.970824  | 4.300424  | -0.552491 |
| O | -0.019617 | 4.316274  | -1.695575 |
| C | 1.020517  | 4.925236  | 0.323215  |
| C | -0.149644 | 5.299455  | -0.651659 |
| C | 0.616598  | 3.894450  | 1.361382  |



|    |           |           |           |
|----|-----------|-----------|-----------|
| H  | 1.522383  | 3.542344  | 1.871230  |
| H  | -0.055701 | 4.315641  | 2.122345  |
| H  | 0.113908  | 3.036083  | 0.898723  |
| C  | 1.686444  | 6.108579  | 0.996129  |
| H  | 0.971264  | 6.663616  | 1.621272  |
| H  | 2.497186  | 5.757838  | 1.650213  |
| H  | 2.123050  | 6.805426  | 0.269803  |
| C  | 0.042611  | 6.665088  | -1.295654 |
| H  | -0.094786 | 7.485269  | -0.576350 |
| H  | 1.043975  | 6.761705  | -1.739213 |
| H  | -0.693226 | 6.795645  | -2.101130 |
| C  | -1.529093 | 5.185354  | -0.037060 |
| H  | -1.741916 | 4.157397  | 0.278049  |
| H  | -1.630695 | 5.856251  | 0.829753  |
| H  | -2.296485 | 5.473243  | -0.770611 |
| Na | -5.359607 | 0.668155  | 1.452085  |
| H  | 0.576049  | 3.394572  | -4.401983 |
| H  | 2.953389  | 2.628401  | -2.566908 |
| H  | 0.626177  | 1.333403  | -4.457175 |
| O  | -6.700344 | -0.399463 | -0.216595 |
| O  | -4.425648 | 1.758702  | 3.341889  |
| C  | -4.290906 | 3.142006  | 3.417850  |
| H  | -4.504159 | 3.581708  | 2.421306  |
| H  | -5.033495 | 3.546025  | 4.138863  |
| C  | -3.219264 | 1.185357  | 3.727746  |
| H  | -3.322126 | 0.785356  | 4.760074  |
| H  | -2.967909 | 0.346403  | 3.047963  |
| C  | -2.128937 | 2.229754  | 3.681027  |
| H  | -1.630253 | 2.212426  | 2.689406  |
| H  | -1.377811 | 2.079579  | 4.486340  |
| C  | -2.883904 | 3.506686  | 3.852922  |
| H  | -2.880404 | 3.810856  | 4.923099  |
| H  | -2.456566 | 4.321536  | 3.228458  |
| C  | -7.131509 | -1.700519 | -0.000973 |
| H  | -7.914903 | -1.709331 | 0.786010  |
| H  | -6.275473 | -2.320316 | 0.343946  |
| C  | -6.281309 | -0.344644 | -1.539319 |
| H  | -6.433285 | 0.681469  | -1.935130 |
| H  | -5.199826 | -0.593022 | -1.594467 |
| C  | -7.081604 | -1.348224 | -2.346965 |
| H  | -7.881943 | -0.835467 | -2.924691 |
| H  | -6.422918 | -1.913836 | -3.042063 |
| C  | -7.680283 | -2.249130 | -1.302659 |
| H  | -8.790076 | -2.174972 | -1.316767 |
| H  | -7.373975 | -3.307510 | -1.450801 |
| O  | -5.193908 | -1.345005 | 2.716043  |
| C  | -4.192851 | -2.296738 | 2.575571  |
| H  | -3.719422 | -2.205703 | 1.576987  |
| H  | -3.415931 | -2.128388 | 3.353006  |
| C  | -6.120408 | -1.883071 | 3.596924  |
| H  | -5.852479 | -1.590325 | 4.636645  |
| H  | -7.129587 | -1.480897 | 3.366316  |
| C  | -4.807493 | -3.671186 | 2.742915  |
| H  | -4.997578 | -4.134720 | 1.749623  |
| H  | -4.146407 | -4.332944 | 3.344300  |
| C  | -6.105287 | -3.393467 | 3.450901  |
| H  | -6.139559 | -3.889423 | 4.445528  |
| H  | -6.965168 | -3.734011 | 2.832789  |

178

Figure\_S6\_imid-3\_modeR1\_ts(CuHadd)\_03 / electronic energy: -3601.979987684155 a.u. / lowest freq: -758.54 cm<sup>-1</sup>

|    |           |           |           |
|----|-----------|-----------|-----------|
| C  | -1.452449 | -2.295883 | -0.260875 |
| H  | -2.245401 | -1.710836 | 0.226757  |
| C  | -0.087411 | -2.159190 | 0.446448  |
| H  | 0.453285  | -3.119295 | 0.506697  |
| C  | -0.026191 | -0.947510 | -1.593590 |
| C  | -2.138458 | -1.603410 | -2.627726 |
| C  | -2.077793 | -2.602020 | -3.603820 |
| C  | -3.135572 | -0.619984 | -2.724391 |
| C  | -2.995775 | -2.639106 | -4.648870 |
| H  | -1.280112 | -3.344687 | -3.550308 |
| C  | -4.048115 | -0.652221 | -3.779875 |
| C  | -3.988664 | -1.665208 | -4.734441 |
| H  | -2.926394 | -3.425738 | -5.403007 |
| H  | -4.800366 | 0.136892  | -3.838033 |
| H  | -4.711077 | -1.683828 | -5.553289 |
| C  | 1.977989  | -0.887138 | -0.238854 |
| C  | 2.950375  | -1.891079 | -0.138157 |
| C  | 2.330976  | 0.443492  | 0.022449  |
| C  | 4.258111  | -1.572884 | 0.242812  |
| C  | 3.641401  | 0.767215  | 0.412290  |
| C  | 4.600889  | -0.246693 | 0.522761  |
| H  | 5.605581  | -0.008940 | 0.851898  |
| S  | -3.147734 | 0.781423  | -1.608052 |
| O  | -3.156033 | 0.224196  | -0.220294 |
| O  | -4.420633 | 1.508446  | -1.871239 |
| O  | -1.918642 | 1.518524  | -1.968496 |
| Cu | 0.330390  | 0.335365  | -2.985813 |
| C  | -1.895121 | -3.729965 | -0.418158 |

|   |           |           |           |
|---|-----------|-----------|-----------|
| C | -3.110259 | -4.157280 | 0.145317  |
| C | -1.100366 | -4.660835 | -1.112928 |
| C | -3.526913 | -5.484078 | 0.005649  |
| H | -3.736829 | -3.466158 | 0.693395  |
| C | -1.522739 | -5.985784 | -1.253128 |
| H | -0.156892 | -4.358411 | -1.550205 |
| C | -2.735718 | -6.396862 | -0.695529 |
| H | -4.464989 | -5.804079 | 0.440570  |
| H | -0.908747 | -6.694272 | -1.793843 |
| H | -3.061293 | -7.423235 | -0.804517 |
| C | -0.200627 | -1.577217 | 1.833280  |
| C | 0.150126  | -2.347080 | 2.955511  |
| C | -0.625754 | -0.248897 | 2.021683  |
| C | 0.079085  | -1.797804 | 4.238849  |
| H | 0.477891  | -3.371999 | 2.838837  |
| C | -0.703584 | 0.293018  | 3.305918  |
| H | -0.885393 | 0.368945  | 1.173207  |
| C | -0.348140 | -0.479589 | 4.413962  |
| H | 0.353677  | -2.395529 | 5.098222  |
| H | -1.031907 | 1.315420  | 3.441142  |
| H | -0.404670 | -0.056747 | 5.408467  |
| N | -1.191652 | -1.632902 | -1.561628 |
| N | 0.625885  | -1.238058 | -0.454615 |
| H | 1.570252  | 1.205815  | -0.011988 |
| H | 2.683709  | -2.924126 | -0.325724 |
| C | 4.009890  | 2.154166  | 0.777901  |
| C | 4.782896  | 2.946272  | -0.121727 |
| C | 3.726412  | 2.640462  | 2.088658  |
| C | 5.238698  | 4.207505  | 0.301463  |
| C | 4.229096  | 3.899905  | 2.467283  |
| C | 4.958783  | 4.677708  | 1.577478  |
| H | 5.842485  | 4.825648  | -0.349170 |
| H | 4.078839  | 4.283917  | 3.466059  |
| H | 5.334547  | 5.643756  | 1.889510  |
| C | 5.253319  | -2.646140 | 0.419305  |
| C | 5.312753  | -3.359245 | 1.649581  |
| C | 6.131887  | -2.984765 | -0.647022 |
| C | 6.240166  | -4.409047 | 1.780287  |
| C | 7.041578  | -4.042675 | -0.465942 |
| C | 7.091760  | -4.744965 | 0.733380  |
| H | 6.307403  | -4.976189 | 2.699335  |
| H | 7.718094  | -4.332045 | -1.259313 |
| H | 7.797788  | -5.556794 | 0.852849  |
| C | 6.111084  | -2.244358 | -1.984461 |
| H | 5.369077  | -1.420137 | -1.975036 |
| C | 5.693543  | -3.180669 | -3.124452 |
| H | 4.707605  | -3.639192 | -2.895509 |
| H | 5.597643  | -2.607616 | -4.071451 |
| H | 6.439602  | -3.988975 | -3.276390 |
| C | 7.466409  | -1.588618 | -2.277409 |
| H | 7.769149  | -0.944830 | -1.424478 |
| H | 8.255822  | -2.350078 | -2.449460 |
| H | 7.391440  | -0.951276 | -3.184334 |
| C | 4.402451  | -3.020952 | 2.831948  |
| H | 3.746590  | -2.156695 | 2.601736  |
| C | 5.219846  | -2.608254 | 4.062305  |
| H | 4.541260  | -2.247608 | 4.864875  |
| H | 5.811023  | -3.459772 | 4.459807  |
| H | 5.913096  | -1.781483 | 3.797541  |
| C | 3.466561  | -4.190415 | 3.158171  |
| H | 2.765281  | -3.901010 | 3.969768  |
| H | 2.868451  | -4.457493 | 2.260489  |
| H | 4.036855  | -5.083465 | 3.489737  |
| C | 3.002694  | 1.784691  | 3.131376  |
| H | 2.442652  | 0.963233  | 2.641087  |
| C | 5.191824  | 2.443830  | -1.506264 |
| H | 4.647175  | 1.512004  | -1.760218 |
| C | 4.849606  | 3.454812  | -2.611667 |
| H | 3.808892  | 3.817793  | -2.498573 |
| H | 5.531464  | 4.330520  | -2.588718 |
| H | 4.943862  | 2.971106  | -3.607369 |
| C | 6.686141  | 2.103574  | -1.534553 |
| H | 7.304808  | 3.010455  | -1.364900 |
| H | 6.923897  | 1.359771  | -0.745792 |
| H | 6.958821  | 1.665550  | -2.518387 |
| C | 1.955682  | 2.578517  | 3.929558  |
| H | 2.428891  | 3.304084  | 4.622511  |
| H | 1.275939  | 3.124283  | 3.244257  |
| H | 1.347823  | 1.885531  | 4.546667  |
| C | 4.017150  | 1.130141  | 4.073682  |
| H | 4.741956  | 0.524192  | 3.489667  |
| H | 4.575365  | 1.899534  | 4.648825  |
| H | 3.497287  | 0.454492  | 4.786361  |
| C | 1.544774  | 1.996563  | -3.183165 |
| C | 0.967943  | 1.584869  | -4.444979 |
| H | 1.630978  | 1.205062  | -5.231000 |
| B | 0.966845  | 3.091822  | -2.320202 |
| O | 1.495641  | 3.493527  | -1.093714 |

|    |           |           |           |
|----|-----------|-----------|-----------|
| O  | -0.128883 | 3.876764  | -2.664701 |
| C  | 0.515126  | 4.315414  | -0.452353 |
| C  | -0.276196 | 4.900307  | -1.671861 |
| C  | -0.348401 | 3.417857  | 0.424696  |
| H  | 0.295446  | 2.866559  | 1.121513  |
| H  | -1.061112 | 4.002418  | 1.024477  |
| H  | -0.905732 | 2.683887  | -0.173566 |
| C  | 1.222262  | 5.348906  | 0.401358  |
| H  | 0.508929  | 6.068690  | 0.830321  |
| H  | 1.736264  | 4.855289  | 1.237335  |
| H  | 1.976502  | 5.907029  | -0.167818 |
| C  | 0.364261  | 6.168033  | -2.218070 |
| H  | 0.234490  | 7.023757  | -1.539509 |
| H  | 1.440773  | 6.025651  | -2.389384 |
| H  | -0.097479 | 6.425787  | -3.181285 |
| C  | -1.755007 | 5.107050  | -1.415738 |
| H  | -2.248072 | 4.137732  | -1.274165 |
| H  | -1.931401 | 5.743524  | -0.535216 |
| H  | -2.229739 | 5.594242  | -2.279108 |
| Na | -5.374681 | 0.714677  | 0.411850  |
| H  | 0.183019  | 2.227953  | -4.862299 |
| H  | 2.524438  | 1.576635  | -2.927501 |
| H  | 0.072489  | 0.219061  | -4.570326 |
| O  | -6.361541 | -1.298631 | -0.130782 |
| O  | -5.011139 | -0.054855 | 2.611591  |
| C  | -4.537940 | 0.812284  | 3.586877  |
| H  | -3.675895 | 1.386766  | 3.181442  |
| H  | -5.338415 | 1.527801  | 3.867393  |
| C  | -4.342056 | -1.255510 | 2.802143  |
| H  | -4.971183 | -2.098800 | 2.449570  |
| H  | -3.399720 | -1.248259 | 2.215656  |
| C  | -4.034233 | -1.405913 | 4.276945  |
| H  | -3.026138 | -1.847160 | 4.433291  |
| H  | -4.802180 | -2.043694 | 4.767678  |
| C  | -4.113125 | 0.002148  | 4.797804  |
| H  | -4.874349 | 0.076244  | 5.605468  |
| H  | -3.129811 | 0.349358  | 5.182144  |
| C  | -7.379196 | -1.963655 | 0.538278  |
| H  | -8.361168 | -1.578747 | 0.184049  |
| H  | -7.300327 | -1.777357 | 1.629873  |
| C  | -5.988422 | -2.084131 | -1.217197 |
| H  | -6.275874 | -1.571772 | -2.159966 |
| H  | -4.886216 | -2.209541 | -1.204165 |
| C  | -6.660148 | -3.443577 | -1.127467 |
| H  | -7.460250 | -3.526927 | -1.896033 |
| H  | -5.933102 | -4.274445 | -1.253896 |
| C  | -7.260902 | -3.439551 | 0.242587  |
| H  | -8.249099 | -3.947920 | 0.267332  |
| H  | -6.564485 | -3.917331 | 0.967104  |
| O  | -5.354948 | 2.907962  | 1.181839  |
| C  | -4.172887 | 3.586605  | 0.926225  |
| H  | -3.348868 | 2.857457  | 0.783020  |
| H  | -4.291096 | 4.184649  | -0.003837 |
| C  | -6.131218 | 3.757415  | 1.956461  |
| H  | -6.763045 | 4.387652  | 1.291591  |
| H  | -6.799458 | 3.159500  | 2.611535  |
| C  | -3.876101 | 4.493318  | 2.103368  |
| H  | -3.136080 | 4.015743  | 2.783136  |
| H  | -3.489200 | 5.478015  | 1.761237  |
| C  | -5.208219 | 4.628105  | 2.789204  |
| H  | -5.556335 | 5.684122  | 2.795652  |
| H  | -5.148318 | 4.247168  | 3.832633  |

178

Figure\_S6\_imid-3\_modeR1\_prod(CuHadd) / electronic energy: -3602.032592781751 a.u. / lowest freq: 12.28 cm-1

|   |           |           |           |
|---|-----------|-----------|-----------|
| C | -1.562886 | -1.810718 | -1.429492 |
| H | -2.264271 | -1.637490 | -0.600388 |
| C | -0.168850 | -2.262258 | -0.942918 |
| H | 0.240485  | -3.088612 | -1.547707 |
| C | -0.020822 | -0.045842 | -1.769776 |
| C | -2.248885 | 0.394170  | -2.568926 |
| C | -2.456598 | 0.400370  | -3.950229 |
| C | -2.988618 | 1.273212  | -1.759326 |
| C | -3.378389 | 1.270505  | -4.527634 |
| H | -1.866345 | -0.274530 | -4.573609 |
| C | -3.891468 | 2.160331  | -2.345418 |
| C | -4.092114 | 2.156799  | -3.724468 |
| H | -3.524379 | 1.264762  | -5.609894 |
| H | -4.434722 | 2.849791  | -1.697279 |
| H | -4.804533 | 2.853846  | -4.170820 |
| C | 1.986893  | -0.906030 | -0.724436 |
| C | 2.864101  | -2.004103 | -0.759394 |
| C | 2.430159  | 0.303946  | -0.162290 |
| C | 4.160128  | -1.892770 | -0.239858 |
| C | 3.719816  | 0.405630  | 0.373790  |
| C | 4.586102  | -0.688856 | 0.326641  |
| H | 5.580494  | -0.611237 | 0.751579  |
| S | -2.812034 | 1.285901  | 0.029400  |
| O | -3.143007 | -0.107455 | 0.469234  |

|    |           |           |           |
|----|-----------|-----------|-----------|
| O  | -3.858711 | 2.227993  | 0.513334  |
| O  | -1.420812 | 1.675680  | 0.310623  |
| Cu | 0.360271  | 1.782155  | -2.272931 |
| C  | -2.182373 | -2.744863 | -2.436236 |
| C  | -3.414330 | -3.362333 | -2.157274 |
| C  | -1.550419 | -3.002618 | -3.666393 |
| C  | -4.005390 | -4.214532 | -3.094072 |
| H  | -3.919220 | -3.184704 | -1.216338 |
| C  | -2.145423 | -3.855789 | -4.600218 |
| H  | -0.602168 | -2.536533 | -3.903922 |
| C  | -3.372368 | -4.460278 | -4.314914 |
| H  | -4.955460 | -4.683642 | -2.873554 |
| H  | -1.655899 | -4.046812 | -5.546362 |
| H  | -3.832199 | -5.119697 | -5.039518 |
| C  | -0.181328 | -2.673378 | 0.510224  |
| C  | -0.071563 | -4.030567 | 0.858142  |
| C  | -0.302819 | -1.713420 | 1.533772  |
| C  | -0.080651 | -4.418567 | 2.201012  |
| H  | 0.016223  | -4.789706 | 0.091013  |
| C  | -0.291752 | -2.105205 | 2.874751  |
| H  | -0.395038 | -0.662319 | 1.295534  |
| C  | -0.182733 | -3.456602 | 3.208387  |
| H  | 0.001258  | -5.465875 | 2.461137  |
| H  | -0.382632 | -1.362723 | 3.655932  |
| H  | -0.182639 | -3.758923 | 4.247445  |
| N  | -1.269329 | -0.484592 | -2.017936 |
| N  | 0.644795  | -1.042791 | -1.166446 |
| H  | 1.758253  | 1.150736  | -0.095223 |
| H  | 2.544080  | -2.947528 | -1.182223 |
| C  | 4.137120  | 1.639370  | 1.060821  |
| C  | 4.830708  | 2.653718  | 0.345726  |
| C  | 3.822395  | 1.819154  | 2.436698  |
| C  | 5.156404  | 3.849327  | 1.011831  |
| C  | 4.157106  | 3.038567  | 3.053683  |
| C  | 4.812792  | 4.040664  | 2.346111  |
| H  | 5.679904  | 4.644055  | 0.497048  |
| H  | 3.910256  | 3.219496  | 4.091394  |
| H  | 5.063811  | 4.971364  | 2.838468  |
| C  | 5.069646  | -3.052356 | -0.248574 |
| C  | 5.126480  | -3.914701 | 0.881722  |
| C  | 5.937862  | -3.264100 | -1.355162 |
| C  | 6.062106  | -4.965475 | 0.885637  |
| C  | 6.848763  | -4.335155 | -1.306841 |
| C  | 6.908292  | -5.173142 | -0.198449 |
| H  | 6.145965  | -5.628548 | 1.736441  |
| H  | 7.528983  | -4.519991 | -2.127783 |
| H  | 7.621488  | -5.987196 | -0.176613 |
| C  | 5.928133  | -2.350998 | -2.581653 |
| H  | 5.141764  | -1.573732 | -2.496786 |
| C  | 5.604878  | -3.136651 | -3.858709 |
| H  | 4.647449  | -3.686387 | -3.733196 |
| H  | 5.493428  | -2.438482 | -4.715767 |
| H  | 6.408388  | -3.862894 | -4.102470 |
| C  | 7.256666  | -1.597479 | -2.715800 |
| H  | 7.463307  | -1.026637 | -1.784926 |
| H  | 8.098757  | -2.296188 | -2.904852 |
| H  | 7.201350  | -0.875242 | -3.558264 |
| C  | 4.223241  | -3.717508 | 2.100596  |
| H  | 3.491622  | -2.901212 | 1.930757  |
| C  | 5.044948  | -3.308203 | 3.327799  |
| H  | 4.369658  | -3.087106 | 4.181948  |
| H  | 5.745264  | -4.115605 | 3.629329  |
| H  | 5.628860  | -2.390030 | 3.102607  |
| C  | 3.387319  | -4.970722 | 2.388913  |
| H  | 2.670973  | -4.765735 | 3.212616  |
| H  | 2.807965  | -5.256043 | 1.484881  |
| H  | 4.026032  | -5.825909 | 2.692908  |
| C  | 3.130778  | 0.731231  | 3.261210  |
| H  | 3.003680  | -0.200558 | 2.673315  |
| C  | 5.244198  | 2.478886  | -1.115942 |
| H  | 4.912512  | 1.497473  | -1.511921 |
| C  | 4.589872  | 3.537270  | -2.010446 |
| H  | 3.488082  | 3.490040  | -1.898548 |
| H  | 4.936676  | 4.559612  | -1.752223 |
| H  | 4.836336  | 3.340991  | -3.075781 |
| C  | 6.770310  | 2.499052  | -1.261981 |
| H  | 7.188397  | 3.490943  | -0.989332 |
| H  | 7.223347  | 1.723913  | -0.607216 |
| H  | 7.055026  | 2.273091  | -2.311956 |
| C  | 1.722300  | 1.167296  | 3.675653  |
| H  | 1.745106  | 2.110479  | 4.260952  |
| H  | 1.095798  | 1.314606  | 2.770671  |
| H  | 1.246636  | 0.379657  | 4.296764  |
| C  | 3.971069  | 0.334836  | 4.481960  |
| H  | 4.998453  | 0.058147  | 4.161949  |
| H  | 4.031963  | 1.162821  | 5.218809  |
| H  | 3.517451  | -0.546277 | 4.984454  |
| C  | 0.529944  | 3.596620  | -3.047910 |

|    |           |           |           |
|----|-----------|-----------|-----------|
| C  | -0.514030 | 3.765660  | -4.141656 |
| H  | -0.473588 | 4.752997  | -4.645224 |
| B  | 0.316787  | 4.325105  | -1.734754 |
| O  | 1.332905  | 4.763318  | -0.880763 |
| O  | -0.936173 | 4.630285  | -1.194589 |
| C  | 0.736062  | 5.065910  | 0.389390  |
| C  | -0.738750 | 5.413271  | -0.007753 |
| C  | 0.828814  | 3.812761  | 1.243648  |
| H  | 1.880215  | 3.505864  | 1.295062  |
| H  | 0.471655  | 3.980568  | 2.270588  |
| H  | 0.246437  | 2.990010  | 0.809278  |
| C  | 1.506677  | 6.199364  | 1.035036  |
| H  | 1.029012  | 6.520334  | 1.972835  |
| H  | 2.526808  | 5.869174  | 1.277446  |
| H  | 1.590228  | 7.071380  | 0.374246  |
| C  | -0.906831 | 6.876524  | -0.395395 |
| H  | -0.835205 | 7.547975  | 0.472717  |
| H  | -0.149993 | 7.185051  | -1.130801 |
| H  | -1.895821 | 7.021105  | -0.852322 |
| C  | -1.770433 | 5.017604  | 1.029098  |
| H  | -1.772809 | 3.934894  | 1.198426  |
| H  | -1.587376 | 5.535504  | 1.983445  |
| H  | -2.777870 | 5.295409  | 0.686857  |
| Na | -5.091636 | 0.296706  | 1.635765  |
| H  | -1.537073 | 3.676603  | -3.740823 |
| H  | 1.560605  | 3.705174  | -3.426643 |
| H  | -0.441121 | 3.015205  | -4.948842 |
| O  | -6.395422 | -0.714939 | -0.110802 |
| O  | -4.172575 | 1.158099  | 3.667830  |
| C  | -4.092639 | 2.529353  | 3.894469  |
| H  | -4.316951 | 3.066024  | 2.948923  |
| H  | -4.852436 | 2.825336  | 4.649001  |
| C  | -2.919516 | 0.605634  | 3.911732  |
| H  | -2.952383 | 0.047616  | 4.872784  |
| H  | -2.658675 | -0.105704 | 3.102779  |
| C  | -1.887127 | 1.707257  | 3.987279  |
| H  | -1.428302 | 1.870420  | 2.988385  |
| H  | -1.097930 | 1.483335  | 4.736874  |
| C  | -2.702605 | 2.895191  | 4.376702  |
| H  | -2.700483 | 3.012464  | 5.483135  |
| H  | -2.328177 | 3.825965  | 3.897989  |
| C  | -6.807999 | -2.036389 | -0.012212 |
| H  | -7.580170 | -2.128732 | 0.780502  |
| H  | -5.940664 | -2.674381 | 0.262324  |
| C  | -6.007157 | -0.527374 | -1.430194 |
| H  | -6.179377 | 0.529926  | -1.721106 |
| H  | -4.924488 | -0.756088 | -1.530837 |
| C  | -6.815026 | -1.457017 | -2.314145 |
| H  | -7.640950 | -0.902098 | -2.811303 |
| H  | -6.169548 | -1.934528 | -3.083655 |
| C  | -7.367291 | -2.471692 | -1.352242 |
| H  | -8.478837 | -2.431207 | -1.340661 |
| H  | -7.032731 | -3.500684 | -1.608687 |
| O  | -4.900211 | -1.854748 | 2.640757  |
| C  | -3.870135 | -2.753948 | 2.401217  |
| H  | -3.455777 | -2.592749 | 1.384914  |
| H  | -3.062228 | -2.589395 | 3.146159  |
| C  | -5.761081 | -2.478882 | 3.530977  |
| H  | -5.448259 | -2.242305 | 4.572604  |
| H  | -6.793821 | -2.100332 | 3.378012  |
| C  | -4.416174 | -4.161805 | 2.529753  |
| H  | -4.614518 | -4.596010 | 1.524871  |
| H  | -3.706547 | -4.813716 | 3.084980  |
| C  | -5.702435 | -3.974793 | 3.286979  |
| H  | -5.695612 | -4.535653 | 4.247018  |
| H  | -6.567119 | -4.301021 | 2.667792  |

178

Figure\_S6\_imid-3\_modeR2\_ed(CuHadd) / electronic energy: -3602.007795207243 a.u. / lowest freq: 16.29 cm<sup>-1</sup>

|   |           |           |           |
|---|-----------|-----------|-----------|
| C | -1.131466 | -2.058778 | 1.976183  |
| H | -2.188360 | -1.757381 | 2.019514  |
| C | -0.161881 | -0.894153 | 2.253578  |
| H | 0.781793  | -1.237976 | 2.716700  |
| C | -0.123635 | -1.382750 | -0.044617 |
| C | -1.335865 | -3.466723 | -0.171709 |
| C | -0.427815 | -4.393128 | -0.693291 |
| C | -2.709668 | -3.634600 | -0.418508 |
| C | -0.866747 | -5.478178 | -1.445084 |
| H | 0.638187  | -4.236271 | -0.514338 |
| C | -3.142185 | -4.737169 | -1.160559 |
| C | -2.230656 | -5.657063 | -1.671981 |
| H | -0.137297 | -6.183741 | -1.849952 |
| H | -4.211544 | -4.839986 | -1.354411 |
| H | -2.587391 | -6.507620 | -2.256966 |
| C | 0.981729  | 0.641055  | 0.601058  |
| C | 0.437885  | 1.900819  | 0.333217  |
| C | 2.371926  | 0.475725  | 0.622076  |
| C | 1.274117  | 2.997761  | 0.101916  |
| C | 3.217210  | 1.581752  | 0.434329  |

|    |           |           |           |
|----|-----------|-----------|-----------|
| C  | 2.661760  | 2.845138  | 0.185983  |
| H  | 3.307147  | 3.703126  | 0.040936  |
| S  | -3.960758 | -2.465500 | 0.132185  |
| O  | -5.107439 | -2.655933 | -0.803457 |
| O  | -3.356825 | -1.112658 | -0.044508 |
| O  | -4.264956 | -2.818627 | 1.532767  |
| Cu | 0.395561  | -1.120877 | -1.927548 |
| C  | -0.910137 | -3.242492 | 2.881634  |
| C  | -1.904878 | -3.633953 | 3.794625  |
| C  | 0.292177  | -3.967840 | 2.831392  |
| C  | -1.701685 | -4.735549 | 4.631596  |
| H  | -2.834658 | -3.084420 | 3.865318  |
| C  | 0.492492  | -5.068767 | 3.668044  |
| H  | 1.068803  | -3.678259 | 2.140975  |
| C  | -0.504754 | -5.453505 | 4.567280  |
| H  | -2.472106 | -5.031475 | 5.331807  |
| H  | 1.420992  | -5.622817 | 3.619106  |
| H  | -0.349259 | -6.305908 | 5.215806  |
| C  | -0.769465 | 0.194355  | 3.101284  |
| C  | -0.178386 | 0.552205  | 4.325784  |
| C  | -1.927498 | 0.871807  | 2.679623  |
| C  | -0.746907 | 1.554836  | 5.117573  |
| H  | 0.719857  | 0.055067  | 4.670681  |
| C  | -2.494299 | 1.870444  | 3.474116  |
| H  | -2.387433 | 0.625577  | 1.734811  |
| C  | -1.907642 | 2.208106  | 4.695561  |
| H  | -0.287789 | 1.824642  | 6.059746  |
| H  | -3.383338 | 2.388185  | 3.138436  |
| H  | -2.345553 | 2.984517  | 5.309288  |
| N  | -0.805630 | -2.371405 | 0.560838  |
| N  | 0.124981  | -0.443774 | 0.883179  |
| H  | 2.791393  | -0.500733 | 0.824095  |
| H  | -0.633421 | 2.028208  | 0.311721  |
| C  | 4.684784  | 1.428329  | 0.548566  |
| C  | 5.268948  | 1.128290  | 1.815025  |
| C  | 5.519124  | 1.596222  | -0.597258 |
| C  | 6.661924  | 0.950080  | 1.895353  |
| C  | 6.911471  | 1.455226  | -0.448373 |
| C  | 7.470561  | 1.119273  | 0.778475  |
| H  | 7.134115  | 0.698221  | 2.835677  |
| H  | 7.575153  | 1.590272  | -1.291937 |
| H  | 8.542399  | 0.995975  | 0.866126  |
| C  | 0.693470  | 4.302953  | -0.266166 |
| C  | 0.450873  | 4.606480  | -1.635816 |
| C  | 0.362722  | 5.248476  | 0.743266  |
| C  | -0.131993 | 5.843843  | -1.964195 |
| C  | -0.195152 | 6.482366  | 0.360725  |
| C  | -0.446446 | 6.769806  | -0.976203 |
| H  | -0.342836 | 6.099790  | -2.994133 |
| H  | -0.445635 | 7.229852  | 1.101710  |
| H  | -0.887191 | 7.719983  | -1.249332 |
| C  | 0.596465  | 4.968326  | 2.226883  |
| H  | 0.974910  | 3.937693  | 2.385338  |
| C  | -0.710462 | 5.064886  | 3.023356  |
| H  | -1.482945 | 4.413799  | 2.562480  |
| H  | -0.542175 | 4.727320  | 4.067971  |
| H  | -1.092785 | 6.106482  | 3.053739  |
| C  | 1.661385  | 5.910157  | 2.799424  |
| H  | 2.603690  | 5.812878  | 2.218579  |
| H  | 1.324102  | 6.967646  | 2.763543  |
| H  | 1.876873  | 5.643361  | 3.856215  |
| C  | 0.793114  | 3.628292  | -2.759993 |
| H  | 1.280926  | 2.715290  | -2.363141 |
| C  | 1.795375  | 4.242406  | -3.744654 |
| H  | 2.143542  | 3.469806  | -4.463272 |
| H  | 1.339748  | 5.075957  | -4.319273 |
| H  | 2.678814  | 4.628286  | -3.193349 |
| C  | -0.473972 | 3.157178  | -3.482550 |
| H  | -0.218581 | 2.375553  | -4.229269 |
| H  | -1.180900 | 2.715519  | -2.750470 |
| H  | -0.978095 | 3.996882  | -4.005536 |
| C  | 4.960418  | 1.926964  | -1.983748 |
| H  | 3.852709  | 1.928723  | -1.980378 |
| C  | 4.441062  | 1.028096  | 3.099248  |
| H  | 3.376998  | 1.273693  | 2.914337  |
| C  | 4.466947  | -0.397589 | 3.663577  |
| H  | 4.092867  | -1.115920 | 2.904105  |
| H  | 5.494745  | -0.693322 | 3.961957  |
| H  | 3.806251  | -0.466137 | 4.554208  |
| C  | 4.910288  | 2.045025  | 4.148367  |
| H  | 5.930876  | 1.809446  | 4.515958  |
| H  | 4.909891  | 3.067224  | 3.712631  |
| H  | 4.217931  | 2.039901  | 5.017477  |
| C  | 5.362476  | 0.874797  | -3.024883 |
| H  | 6.457257  | 0.875550  | -3.207101 |
| H  | 5.056310  | -0.131472 | -2.681263 |
| H  | 4.848441  | 1.078666  | -3.988582 |
| C  | 5.403404  | 3.325505  | -2.430254 |

|    |           |           |           |
|----|-----------|-----------|-----------|
| H  | 5.073437  | 4.085011  | -1.690385 |
| H  | 6.507497  | 3.382994  | -2.533883 |
| H  | 4.947117  | 3.574884  | -3.411672 |
| C  | 1.531764  | -2.587511 | -2.824199 |
| C  | 1.431232  | -1.414130 | -3.599730 |
| H  | 0.792572  | -1.361746 | -4.484899 |
| B  | 2.727071  | -2.940341 | -1.933320 |
| O  | 2.922731  | -4.199119 | -1.392664 |
| O  | 3.768285  | -2.085547 | -1.635195 |
| C  | 4.097134  | -4.131241 | -0.547863 |
| C  | 4.854822  | -2.901085 | -1.140104 |
| C  | 3.623525  | -3.892954 | 0.874551  |
| H  | 2.966750  | -4.718240 | 1.180032  |
| H  | 4.460154  | -3.851945 | 1.585327  |
| H  | 3.059533  | -2.952531 | 0.953756  |
| C  | 4.846878  | -5.441994 | -0.642650 |
| H  | 5.794608  | -5.392740 | -0.087011 |
| H  | 4.248618  | -6.253668 | -0.207057 |
| H  | 5.070173  | -5.711304 | -1.681902 |
| C  | 5.720075  | -3.274229 | -2.334250 |
| H  | 6.606329  | -3.848663 | -2.031547 |
| H  | 5.158038  | -3.871142 | -3.066229 |
| H  | 6.066947  | -2.363677 | -2.839563 |
| C  | 5.660244  | -2.114803 | -0.131497 |
| H  | 5.025322  | -1.669362 | 0.641892  |
| H  | 6.404380  | -2.757182 | 0.360509  |
| H  | 6.204587  | -1.305092 | -0.632117 |
| Na | -5.082319 | -0.318036 | -1.503679 |
| H  | 2.249162  | -0.683345 | -3.594101 |
| H  | 0.816803  | -3.392700 | -3.044195 |
| H  | -0.289323 | 0.246180  | -2.348210 |
| O  | -6.355283 | 0.360926  | 0.401382  |
| O  | -4.377928 | 1.961395  | -1.685590 |
| C  | -6.038301 | 0.058590  | 1.724351  |
| H  | -6.509539 | -0.906030 | 2.009982  |
| H  | -4.937628 | -0.046210 | 1.817599  |
| C  | -7.071505 | 1.551153  | 0.397428  |
| H  | -6.775282 | 2.169959  | -0.474870 |
| H  | -8.156519 | 1.321060  | 0.313898  |
| C  | -6.796389 | 2.290575  | 1.685095  |
| H  | -7.666250 | 2.903608  | 2.006199  |
| H  | -5.895212 | 2.933254  | 1.570192  |
| C  | -6.514133 | 1.174045  | 2.637168  |
| H  | -5.743049 | 1.457114  | 3.386100  |
| H  | -7.449814 | 0.869970  | 3.156811  |
| C  | -3.472679 | 2.101473  | -0.640089 |
| H  | -2.543788 | 1.547563  | -0.889473 |
| H  | -3.914281 | 1.656772  | 0.273301  |
| C  | -4.454014 | 3.183228  | -2.336596 |
| H  | -3.744062 | 3.188003  | -3.193032 |
| H  | -5.482219 | 3.336154  | -2.727267 |
| C  | -3.182113 | 3.572912  | -0.398554 |
| H  | -2.124176 | 3.801530  | -0.640872 |
| H  | -3.393690 | 3.866367  | 0.653078  |
| C  | -4.094810 | 4.274397  | -1.355330 |
| H  | -5.008448 | 4.623710  | -0.825192 |
| H  | -3.592319 | 5.130386  | -1.856645 |
| O  | -3.857474 | -0.815433 | -3.426990 |
| C  | -3.189503 | 0.172720  | -4.138747 |
| H  | -2.567109 | 0.769970  | -3.439075 |
| H  | -3.930403 | 0.848483  | -4.616273 |
| C  | -3.058782 | -1.947193 | -3.498479 |
| H  | -2.301105 | -1.920486 | -2.683755 |
| H  | -3.683589 | -2.857397 | -3.382719 |
| C  | -2.314322 | -0.484746 | -5.193796 |
| H  | -1.273516 | -0.098825 | -5.133489 |
| H  | -2.718478 | -0.308024 | -6.214718 |
| C  | -2.371423 | -1.946010 | -4.844006 |
| H  | -2.990398 | -2.495133 | -5.587545 |
| H  | -1.361838 | -2.405052 | -4.784227 |

178

Figure\_S6\_imid-3\_modeR2\_ts(CuHadd)\_01 / electronic energy: -3601.993251007392 a.u. / lowest freq: -754.10 cm<sup>-1</sup>

|   |           |           |           |
|---|-----------|-----------|-----------|
| C | -1.160310 | -1.969639 | 2.048599  |
| H | -2.222633 | -1.684454 | 2.055714  |
| C | -0.218101 | -0.779443 | 2.316594  |
| H | 0.720059  | -1.092759 | 2.811349  |
| C | -0.109284 | -1.334252 | 0.035975  |
| C | -1.264857 | -3.444657 | -0.069719 |
| C | -0.308279 | -4.334554 | -0.569117 |
| C | -2.624064 | -3.666210 | -0.347528 |
| C | -0.689158 | -5.445165 | -1.315098 |
| H | 0.748148  | -4.131019 | -0.382453 |
| C | -2.998694 | -4.793584 | -1.085394 |
| C | -2.040426 | -5.682645 | -1.564863 |
| H | 0.078423  | -6.120989 | -1.699952 |
| H | -4.058493 | -4.939713 | -1.303255 |
| H | -2.350776 | -6.553615 | -2.146366 |
| C | 0.957091  | 0.716033  | 0.653948  |

|    |           |           |           |
|----|-----------|-----------|-----------|
| C  | 0.419385  | 1.970011  | 0.355097  |
| C  | 2.346197  | 0.543597  | 0.678365  |
| C  | 1.260210  | 3.054683  | 0.090212  |
| C  | 3.197637  | 1.639242  | 0.460709  |
| C  | 2.647879  | 2.898587  | 0.177860  |
| H  | 3.296747  | 3.748650  | 0.005719  |
| S  | -3.919837 | -2.524257 | 0.149246  |
| O  | -5.036327 | -2.757220 | -0.812671 |
| O  | -3.345602 | -1.157796 | -0.037451 |
| O  | -4.251840 | -2.856791 | 1.548025  |
| Cu | 0.543377  | -1.331529 | -1.757289 |
| C  | -0.942838 | -3.121781 | 2.995559  |
| C  | -1.961712 | -3.514594 | 3.881190  |
| C  | 0.279731  | -3.815050 | 3.013776  |
| C  | -1.764108 | -4.588675 | 4.754424  |
| H  | -2.906405 | -2.987193 | 3.903240  |
| C  | 0.474110  | -4.888635 | 3.886585  |
| H  | 1.079373  | -3.520172 | 2.352461  |
| C  | -0.548265 | -5.276883 | 4.755411  |
| H  | -2.553630 | -4.886121 | 5.432362  |
| H  | 1.418125  | -5.418091 | 3.890015  |
| H  | -0.397138 | -6.107975 | 5.432025  |
| C  | -0.864052 | 0.321394  | 3.119148  |
| C  | -0.303476 | 0.729280  | 4.342420  |
| C  | -2.026096 | 0.963082  | 2.654582  |
| C  | -0.904390 | 1.746965  | 5.089901  |
| H  | 0.596754  | 0.260403  | 4.720134  |
| C  | -2.625511 | 1.976727  | 3.405092  |
| H  | -2.463643 | 0.677793  | 1.710303  |
| C  | -2.067648 | 2.365559  | 4.624799  |
| H  | -0.468080 | 2.055764  | 6.030941  |
| H  | -3.517622 | 2.466222  | 3.036689  |
| H  | -2.530255 | 3.154062  | 5.204012  |
| N  | -0.792271 | -2.318216 | 0.654711  |
| N  | 0.093656  | -0.360117 | 0.942148  |
| H  | 2.759342  | -0.431061 | 0.901594  |
| H  | -0.651407 | 2.101436  | 0.327292  |
| C  | 4.665082  | 1.476673  | 0.572256  |
| C  | 5.252082  | 1.197384  | 1.842312  |
| C  | 5.496487  | 1.610038  | -0.580546 |
| C  | 6.643469  | 1.006106  | 1.920497  |
| C  | 6.887967  | 1.458398  | -0.434248 |
| C  | 7.448931  | 1.143140  | 0.797076  |
| H  | 7.117303  | 0.769783  | 2.864023  |
| H  | 7.549464  | 1.569166  | -1.283037 |
| H  | 8.519862  | 1.010997  | 0.882982  |
| C  | 0.680459  | 4.343245  | -0.331684 |
| C  | 0.439017  | 4.588153  | -1.713224 |
| C  | 0.327100  | 5.320330  | 0.638941  |
| C  | -0.160822 | 5.802707  | -2.092295 |
| C  | -0.251199 | 6.527964  | 0.206543  |
| C  | -0.497198 | 6.760345  | -1.142172 |
| H  | -0.370760 | 6.014751  | -3.132332 |
| H  | -0.523874 | 7.296400  | 0.917757  |
| H  | -0.953275 | 7.691201  | -1.453924 |
| C  | 0.548945  | 5.097382  | 2.134046  |
| H  | 0.965945  | 4.088648  | 2.331504  |
| C  | -0.774298 | 5.166735  | 2.905585  |
| H  | -1.510792 | 4.468393  | 2.454956  |
| H  | -0.611453 | 4.871513  | 3.963931  |
| H  | -1.199370 | 6.192099  | 2.891787  |
| C  | 1.566770  | 6.097822  | 2.693195  |
| H  | 2.519996  | 6.023737  | 2.126980  |
| H  | 1.187518  | 7.139277  | 2.624804  |
| H  | 1.778594  | 5.868866  | 3.759564  |
| C  | 0.797182  | 3.568879  | -2.796040 |
| H  | 1.301482  | 2.682071  | -2.362101 |
| C  | 1.785924  | 4.158439  | -3.808966 |
| H  | 2.152323  | 3.360730  | -4.490170 |
| H  | 1.311539  | 4.952926  | -4.422422 |
| H  | 2.659865  | 4.590351  | -3.277024 |
| C  | -0.461670 | 3.042502  | -3.494203 |
| H  | -0.190468 | 2.252458  | -4.226799 |
| H  | -1.145376 | 2.595623  | -2.743554 |
| H  | -0.997234 | 3.854137  | -4.030066 |
| C  | 4.935920  | 1.913781  | -1.972289 |
| H  | 3.828214  | 1.911903  | -1.967071 |
| C  | 4.429835  | 1.135257  | 3.132515  |
| H  | 3.367467  | 1.387761  | 2.947112  |
| C  | 4.444066  | -0.277195 | 3.729681  |
| H  | 4.057770  | -1.008981 | 2.989465  |
| H  | 5.470416  | -0.576958 | 4.029031  |
| H  | 3.788147  | -0.317982 | 4.625525  |
| C  | 4.915301  | 2.170940  | 4.155649  |
| H  | 5.935132  | 1.932789  | 4.523706  |
| H  | 4.923827  | 3.182775  | 3.696480  |
| H  | 4.227400  | 2.193349  | 5.028005  |
| C  | 5.340739  | 0.844554  | -2.995188 |



|                                                                                                                |           |           |           |
|----------------------------------------------------------------------------------------------------------------|-----------|-----------|-----------|
| H                                                                                                              | 6.431754  | 0.863735  | -3.198121 |
| H                                                                                                              | 5.064302  | -0.159506 | -2.621904 |
| H                                                                                                              | 4.805194  | 1.014700  | -3.953744 |
| C                                                                                                              | 5.376013  | 3.304746  | -2.444495 |
| H                                                                                                              | 5.040556  | 4.078019  | -1.721761 |
| H                                                                                                              | 6.480488  | 3.363758  | -2.543701 |
| H                                                                                                              | 4.923796  | 3.532757  | -3.432921 |
| C                                                                                                              | 1.628939  | -2.613988 | -2.957579 |
| C                                                                                                              | 1.445692  | -1.311452 | -3.557960 |
| H                                                                                                              | 0.902325  | -1.235859 | -4.504062 |
| B                                                                                                              | 2.768596  | -2.986952 | -2.043711 |
| O                                                                                                              | 2.970114  | -4.267671 | -1.522117 |
| O                                                                                                              | 3.784293  | -2.122966 | -1.636148 |
| C                                                                                                              | 4.037611  | -4.172382 | -0.558635 |
| C                                                                                                              | 4.831975  | -2.931740 | -1.072349 |
| C                                                                                                              | 3.407976  | -3.918033 | 0.801117  |
| H                                                                                                              | 2.720971  | -4.740785 | 1.043598  |
| H                                                                                                              | 4.156645  | -3.858269 | 1.603439  |
| H                                                                                                              | 2.833735  | -2.979083 | 0.794682  |
| C                                                                                                              | 4.817759  | -5.468668 | -0.549225 |
| H                                                                                                              | 5.695977  | -5.394430 | 0.108818  |
| H                                                                                                              | 4.189390  | -6.288184 | -0.173841 |
| H                                                                                                              | 5.161364  | -5.745114 | -1.553586 |
| C                                                                                                              | 5.798781  | -3.292924 | -2.190935 |
| H                                                                                                              | 6.658274  | -3.867478 | -1.817749 |
| H                                                                                                              | 5.302565  | -3.885939 | -2.972178 |
| H                                                                                                              | 6.184338  | -2.377024 | -2.658040 |
| C                                                                                                              | 5.549515  | -2.150738 | 0.006592  |
| H                                                                                                              | 4.851405  | -1.721073 | 0.733506  |
| H                                                                                                              | 6.261279  | -2.790328 | 0.548528  |
| H                                                                                                              | 6.119866  | -1.326604 | -0.439704 |
| Na                                                                                                             | -5.024320 | -0.426188 | -1.546442 |
| H                                                                                                              | 2.302104  | -0.625284 | -3.538551 |
| H                                                                                                              | 0.908073  | -3.393084 | -3.239233 |
| H                                                                                                              | 0.406766  | -0.205497 | -2.889765 |
| O                                                                                                              | -6.384399 | 0.290315  | 0.251782  |
| O                                                                                                              | -4.304361 | 1.853325  | -1.807771 |
| C                                                                                                              | -6.117044 | 0.021799  | 1.592764  |
| H                                                                                                              | -6.598945 | -0.935664 | 1.884444  |
| H                                                                                                              | -5.020721 | -0.080685 | 1.729286  |
| C                                                                                                              | -7.109578 | 1.473374  | 0.191665  |
| H                                                                                                              | -6.787150 | 2.071455  | -0.685758 |
| H                                                                                                              | -8.189162 | 1.231707  | 0.076455  |
| C                                                                                                              | -6.885317 | 2.248345  | 1.468364  |
| H                                                                                                              | -7.771306 | 2.860641  | 1.743466  |
| H                                                                                                              | -5.986978 | 2.897315  | 1.367711  |
| C                                                                                                              | -6.625358 | 1.160027  | 2.459010  |
| H                                                                                                              | -5.877601 | 1.468638  | 3.221523  |
| H                                                                                                              | -7.574076 | 0.865149  | 2.959937  |
| C                                                                                                              | -3.476599 | 2.042196  | -0.706653 |
| H                                                                                                              | -2.528567 | 1.487711  | -0.865505 |
| H                                                                                                              | -3.980962 | 1.628330  | 0.188625  |
| C                                                                                                              | -4.434170 | 3.074482  | -2.452969 |
| H                                                                                                              | -3.709922 | 3.120526  | -3.295996 |
| H                                                                                                              | -5.461691 | 3.175015  | -2.862015 |
| C                                                                                                              | -3.214166 | 3.523381  | -0.498782 |
| H                                                                                                              | -2.164032 | 3.769048  | -0.759835 |
| H                                                                                                              | -3.420290 | 3.836523  | 0.548171  |
| C                                                                                                              | -4.149854 | 4.179825  | -1.462908 |
| H                                                                                                              | -5.088406 | 4.474840  | -0.943256 |
| H                                                                                                              | -3.688119 | 5.064960  | -1.952568 |
| O                                                                                                              | -3.736938 | -0.945134 | -3.439723 |
| C                                                                                                              | -3.053571 | 0.034329  | -4.147006 |
| H                                                                                                              | -2.391184 | 0.593903  | -3.451381 |
| H                                                                                                              | -3.779801 | 0.745664  | -4.594102 |
| C                                                                                                              | -2.943998 | -2.082045 | -3.497924 |
| H                                                                                                              | -2.203939 | -2.059573 | -2.667587 |
| H                                                                                                              | -3.576828 | -2.988205 | -3.392609 |
| C                                                                                                              | -2.230286 | -0.636487 | -5.231872 |
| H                                                                                                              | -1.200559 | -0.219471 | -5.259031 |
| H                                                                                                              | -2.710571 | -0.506973 | -6.226682 |
| C                                                                                                              | -2.228030 | -2.087139 | -4.831335 |
| H                                                                                                              | -2.798311 | -2.692219 | -5.570277 |
| H                                                                                                              | -1.197942 | -2.491186 | -4.733338 |
| 178                                                                                                            |           |           |           |
| Figure_S6_imid-3_modeR2_ts(CuHadd)_02 / electronic energy: -3601.990420691354 a.u. / lowest freq: -764.45 cm-1 |           |           |           |
| C                                                                                                              | -1.485438 | -1.721140 | 1.957307  |
| H                                                                                                              | -2.477122 | -1.243747 | 1.958728  |
| C                                                                                                              | -0.343622 | -0.737644 | 2.279209  |
| H                                                                                                              | 0.517600  | -1.241571 | 2.756312  |
| C                                                                                                              | -0.310553 | -1.210943 | -0.019898 |
| C                                                                                                              | -1.813761 | -3.087333 | -0.205285 |
| C                                                                                                              | -1.021431 | -4.114778 | -0.727675 |
| C                                                                                                              | -3.189170 | -3.064408 | -0.486836 |
| C                                                                                                              | -1.585750 | -5.128024 | -1.494965 |
| H                                                                                                              | 0.053922  | -4.096080 | -0.540666 |
| C                                                                                                              | -3.750552 | -4.098486 | -1.242804 |
| C                                                                                                              | -2.958711 | -5.129177 | -1.740534 |

|    |           |           |           |
|----|-----------|-----------|-----------|
| H  | -0.944778 | -5.915808 | -1.898109 |
| H  | -4.819174 | -4.056141 | -1.461130 |
| H  | -3.414163 | -5.924782 | -2.334509 |
| C  | 1.088195  | 0.598003  | 0.681079  |
| C  | 0.779587  | 1.930628  | 0.398126  |
| C  | 2.426186  | 0.190042  | 0.732252  |
| C  | 1.800391  | 2.860324  | 0.178342  |
| C  | 3.458081  | 1.127876  | 0.563505  |
| C  | 3.138409  | 2.468144  | 0.298699  |
| H  | 3.927038  | 3.198609  | 0.165150  |
| S  | -4.270793 | -1.714374 | 0.006007  |
| O  | -5.381336 | -1.738875 | -0.990661 |
| O  | -3.455344 | -0.471656 | -0.140458 |
| O  | -4.693937 | -2.002060 | 1.389887  |
| Cu | 0.360035  | -1.259696 | -1.805263 |
| C  | -1.505083 | -2.924803 | 2.864116  |
| C  | -2.597750 | -3.150271 | 3.719656  |
| C  | -0.433909 | -3.834996 | 2.873125  |
| C  | -2.621582 | -4.270963 | 4.555503  |
| H  | -3.428507 | -2.457229 | 3.747142  |
| C  | -0.461012 | -4.954642 | 3.708487  |
| H  | 0.419489  | -3.674080 | 2.232920  |
| C  | -1.555365 | -5.173757 | 4.548280  |
| H  | -3.466659 | -4.438438 | 5.210649  |
| H  | 0.367281  | -5.651360 | 3.705215  |
| H  | -1.575677 | -6.040721 | 5.195831  |
| C  | -0.781960 | 0.424061  | 3.133321  |
| C  | -0.164371 | 0.665230  | 4.373184  |
| C  | -1.805662 | 1.286298  | 2.702513  |
| C  | -0.577282 | 1.737137  | 5.170658  |
| H  | 0.634421  | 0.024239  | 4.725358  |
| C  | -2.221262 | 2.351052  | 3.504793  |
| H  | -2.279877 | 1.130291  | 1.745771  |
| C  | -1.609361 | 2.574836  | 4.740119  |
| H  | -0.098348 | 1.916842  | 6.124400  |
| H  | -3.013081 | 3.006302  | 3.165102  |
| H  | -1.928236 | 3.403170  | 5.359327  |
| N  | -1.160130 | -2.083250 | 0.557231  |
| N  | 0.047489  | -0.320651 | 0.924514  |
| H  | 2.660253  | -0.845298 | 0.940707  |
| H  | -0.252823 | 2.243334  | 0.349305  |
| C  | 4.872479  | 0.714672  | 0.715329  |
| C  | 5.354023  | 0.294580  | 1.991511  |
| C  | 5.758661  | 0.740347  | -0.404014 |
| C  | 6.686139  | -0.142491 | 2.105285  |
| C  | 7.095199  | 0.339294  | -0.220124 |
| C  | 7.544763  | -0.112762 | 1.014043  |
| H  | 7.075178  | -0.490906 | 3.052838  |
| H  | 7.797826  | 0.359562  | -1.042436 |
| H  | 8.571642  | -0.435739 | 1.127859  |
| C  | 1.462204  | 4.237787  | -0.225456 |
| C  | 1.334189  | 4.556182  | -1.607467 |
| C  | 1.232939  | 5.235803  | 0.761132  |
| C  | 0.974489  | 5.866491  | -1.971353 |
| C  | 0.891207  | 6.535644  | 0.344616  |
| C  | 0.758846  | 6.842515  | -1.005098 |
| H  | 0.859526  | 6.139443  | -3.012038 |
| H  | 0.718624  | 7.320973  | 1.068579  |
| H  | 0.486548  | 7.846292  | -1.305060 |
| C  | 1.343078  | 4.940842  | 2.256276  |
| H  | 1.575555  | 3.871641  | 2.438321  |
| C  | 0.015185  | 5.213014  | 2.972908  |
| H  | -0.803912 | 4.651520  | 2.475877  |
| H  | 0.080083  | 4.878254  | 4.029900  |
| H  | -0.236405 | 6.294137  | 2.965636  |
| C  | 2.486469  | 5.740641  | 2.890840  |
| H  | 3.439280  | 5.522475  | 2.362363  |
| H  | 2.289869  | 6.832487  | 2.842570  |
| H  | 2.607384  | 5.450935  | 3.956620  |
| C  | 1.564327  | 3.519122  | -2.708073 |
| H  | 1.870202  | 2.542434  | -2.282238 |
| C  | 2.703428  | 3.946832  | -3.640909 |
| H  | 2.962716  | 3.114821  | -4.330240 |
| H  | 2.417848  | 4.830940  | -4.248794 |
| H  | 3.605363  | 4.199527  | -3.044580 |
| C  | 0.276321  | 3.253233  | -3.496286 |
| H  | 0.443591  | 2.443913  | -4.238966 |
| H  | -0.526310 | 2.924382  | -2.804961 |
| H  | -0.064494 | 4.162396  | -4.034715 |
| C  | 5.315974  | 1.186864  | -1.799774 |
| H  | 4.227487  | 1.388974  | -1.829866 |
| C  | 4.486858  | 0.335698  | 3.252981  |
| H  | 3.493820  | 0.780394  | 3.046505  |
| C  | 4.229556  | -1.076589 | 3.792851  |
| H  | 3.756121  | -1.705590 | 3.009895  |
| H  | 5.174391  | -1.560604 | 4.118293  |
| H  | 3.537796  | -1.031550 | 4.661098  |
| C  | 5.109549  | 1.232575  | 4.331456  |

|    |           |           |           |
|----|-----------|-----------|-----------|
| H  | 6.056761  | 0.804187  | 4.720668  |
| H  | 5.313987  | 2.241861  | 3.914029  |
| H  | 4.404470  | 1.347115  | 5.182621  |
| C  | 5.555580  | 0.094415  | -2.849364 |
| H  | 6.638136  | -0.091033 | -3.008982 |
| H  | 5.074033  | -0.848027 | -2.527926 |
| H  | 5.106587  | 0.395687  | -3.820062 |
| C  | 6.021750  | 2.486815  | -2.204600 |
| H  | 5.803591  | 3.286330  | -1.465585 |
| H  | 7.121519  | 2.345127  | -2.263573 |
| H  | 5.660510  | 2.823547  | -3.199288 |
| C  | 1.223436  | -2.681969 | -3.029667 |
| C  | 1.273661  | -1.352754 | -3.596074 |
| H  | 0.755136  | -1.158288 | -4.539300 |
| B  | 2.273443  | -3.264256 | -2.118408 |
| O  | 2.253065  | -4.576377 | -1.636105 |
| O  | 3.412477  | -2.593297 | -1.673067 |
| C  | 3.303925  | -4.685348 | -0.656065 |
| C  | 4.301547  | -3.583375 | -1.128125 |
| C  | 2.700048  | -4.365572 | 0.701765  |
| H  | 1.882340  | -5.069872 | 0.908779  |
| H  | 3.431883  | -4.453808 | 1.516995  |
| H  | 2.288919  | -3.344454 | 0.715212  |
| C  | 3.860343  | -6.092240 | -0.673757 |
| H  | 4.732246  | -6.178127 | -0.008568 |
| H  | 3.103117  | -6.807413 | -0.323998 |
| H  | 4.166105  | -6.395097 | -1.682703 |
| C  | 5.202061  | -4.072479 | -2.254378 |
| H  | 5.956483  | -4.787176 | -1.896322 |
| H  | 4.619721  | -4.557737 | -3.050227 |
| H  | 5.733263  | -3.220631 | -2.698946 |
| C  | 5.135006  | -2.968346 | -0.025124 |
| H  | 4.519848  | -2.433881 | 0.706819  |
| H  | 5.714442  | -3.736752 | 0.507161  |
| H  | 5.850474  | -2.251589 | -0.447165 |
| Na | -4.973747 | 0.576217  | -1.643577 |
| H  | 2.236397  | -0.827725 | -3.556279 |
| H  | 0.383834  | -3.320157 | -3.335900 |
| H  | 0.448214  | -0.091444 | -2.896474 |
| O  | -6.332007 | 1.226827  | 0.256266  |
| O  | -3.902239 | 2.674395  | -1.800014 |
| C  | -7.567346 | 0.608025  | 0.404402  |
| H  | -8.287389 | 1.028813  | -0.329069 |
| H  | -7.456635 | -0.479801 | 0.206587  |
| C  | -5.810207 | 1.452225  | 1.528228  |
| H  | -4.844959 | 0.917959  | 1.641799  |
| H  | -5.621053 | 2.540868  | 1.647696  |
| C  | -6.793239 | 0.983051  | 2.583634  |
| H  | -6.899937 | 1.720954  | 3.408460  |
| H  | -6.472497 | 0.000450  | 2.995623  |
| C  | -8.064184 | 0.826219  | 1.814566  |
| H  | -8.668549 | -0.032632 | 2.179306  |
| H  | -8.660878 | 1.763892  | 1.867122  |
| C  | -2.966562 | 2.708998  | -0.773041 |
| H  | -2.130360 | 2.021920  | -1.020532 |
| H  | -3.450732 | 2.356045  | 0.157421  |
| C  | -3.809697 | 3.875788  | -2.486713 |
| H  | -3.119877 | 3.752479  | -3.350754 |
| H  | -4.810541 | 4.167349  | -2.869584 |
| C  | -2.464023 | 4.129145  | -0.575135 |
| H  | -1.386648 | 4.195914  | -0.829708 |
| H  | -2.619869 | 4.477936  | 0.469372  |
| C  | -3.275986 | 4.929945  | -1.544845 |
| H  | -4.118265 | 5.429710  | -1.017234 |
| H  | -2.658268 | 5.684775  | -2.078944 |
| O  | -3.659296 | -0.151504 | -3.468578 |
| C  | -2.843119 | 0.698645  | -4.201218 |
| H  | -2.049689 | 1.107452  | -3.538558 |
| H  | -3.446546 | 1.543505  | -4.594869 |
| C  | -3.117437 | -1.421472 | -3.603932 |
| H  | -2.357170 | -1.585311 | -2.808460 |
| H  | -3.917545 | -2.183791 | -3.499348 |
| C  | -2.223980 | -0.084271 | -5.344381 |
| H  | -1.137728 | 0.134595  | -5.429791 |
| H  | -2.728515 | 0.159193  | -6.305315 |
| C  | -2.469985 | -1.519920 | -4.969001 |
| H  | -3.169088 | -1.994015 | -5.692809 |
| H  | -1.525876 | -2.104327 | -4.924594 |

178

Figure\_S6\_imid-3\_modeR2\_ts(CuHadd)\_03 / electronic energy: -3601.992698054265 a.u. / lowest freq: -733.75 cm<sup>-1</sup>

|   |           |           |           |
|---|-----------|-----------|-----------|
| C | -1.526383 | -1.747391 | 1.761724  |
| H | -2.470765 | -1.191250 | 1.833693  |
| C | -0.296348 | -0.889074 | 2.112272  |
| H | 0.522708  | -1.494761 | 2.543385  |
| C | -0.348288 | -1.217619 | -0.213589 |
| C | -2.019890 | -2.923760 | -0.499015 |
| C | -1.304742 | -3.915528 | -1.183223 |
| C | -3.406309 | -2.810032 | -0.706023 |

|    |           |           |           |
|----|-----------|-----------|-----------|
| C  | -1.948939 | -4.784994 | -2.057168 |
| H  | -0.224899 | -3.982493 | -1.029884 |
| C  | -4.044933 | -3.701178 | -1.573093 |
| C  | -3.326062 | -4.682449 | -2.249115 |
| H  | -1.368985 | -5.546541 | -2.583740 |
| H  | -5.119854 | -3.589911 | -1.725987 |
| H  | -3.842514 | -5.362306 | -2.930218 |
| C  | 1.154689  | 0.482389  | 0.553953  |
| C  | 0.854839  | 1.791928  | 0.168663  |
| C  | 2.486122  | 0.102760  | 0.751459  |
| C  | 1.876842  | 2.736630  | 0.030195  |
| C  | 3.516241  | 1.050203  | 0.634558  |
| C  | 3.201078  | 2.376004  | 0.301512  |
| H  | 3.987132  | 3.116995  | 0.221118  |
| S  | -4.423220 | -1.549606 | 0.075712  |
| O  | -5.630523 | -1.431790 | -0.791982 |
| O  | -3.614077 | -0.293957 | 0.027791  |
| O  | -4.707507 | -2.037957 | 1.437367  |
| Cu | 0.410690  | -1.209258 | -1.961223 |
| C  | -1.618469 | -2.997046 | 2.597273  |
| C  | -2.593696 | -3.103126 | 3.604035  |
| C  | -0.714932 | -4.056087 | 2.409693  |
| C  | -2.674448 | -4.256056 | 4.391057  |
| H  | -3.285704 | -2.290882 | 3.786989  |
| C  | -0.797685 | -5.207563 | 3.196798  |
| H  | 0.047037  | -3.986955 | 1.650122  |
| C  | -1.778748 | -5.308655 | 4.186018  |
| H  | -3.429275 | -4.331591 | 5.163003  |
| H  | -0.100140 | -6.020263 | 3.040474  |
| H  | -1.842070 | -6.200130 | 4.796444  |
| C  | -0.616333 | 0.259592  | 3.034511  |
| C  | 0.035700  | 0.372524  | 4.274864  |
| C  | -1.554441 | 1.241120  | 2.664183  |
| C  | -0.257880 | 1.436908  | 5.132446  |
| H  | 0.770273  | -0.361951 | 4.580393  |
| C  | -1.854321 | 2.295515  | 3.529696  |
| H  | -2.051027 | 1.189684  | 1.705149  |
| C  | -1.206187 | 2.393960  | 4.762943  |
| H  | 0.248089  | 1.517804  | 6.085755  |
| H  | -2.584304 | 3.040609  | 3.240730  |
| H  | -1.434456 | 3.215299  | 5.429675  |
| N  | -1.275653 | -2.039011 | 0.325107  |
| N  | 0.107422  | -0.432766 | 0.777769  |
| H  | 2.712888  | -0.918221 | 1.025951  |
| H  | -0.172333 | 2.076344  | -0.010249 |
| C  | 4.921454  | 0.659300  | 0.894516  |
| C  | 5.313135  | 0.249303  | 2.204425  |
| C  | 5.886897  | 0.688313  | -0.158403 |
| C  | 6.636506  | -0.177932 | 2.415668  |
| C  | 7.208166  | 0.293249  | 0.122768  |
| C  | 7.570158  | -0.151069 | 1.387975  |
| H  | 6.959610  | -0.516566 | 3.391147  |
| H  | 7.968623  | 0.315291  | -0.646318 |
| H  | 8.588034  | -0.467357 | 1.576829  |
| C  | 1.563411  | 4.098662  | -0.439272 |
| C  | 1.493088  | 4.364850  | -1.835894 |
| C  | 1.311305  | 5.137188  | 0.498893  |
| C  | 1.178650  | 5.667695  | -2.263449 |
| C  | 1.020635  | 6.428034  | 0.020217  |
| C  | 0.952093  | 6.685953  | -1.344378 |
| H  | 1.105307  | 5.901313  | -3.317344 |
| H  | 0.833928  | 7.243417  | 0.706449  |
| H  | 0.715398  | 7.683056  | -1.692837 |
| C  | 1.327384  | 4.891499  | 2.006829  |
| H  | 1.520660  | 3.823848  | 2.237558  |
| C  | -0.033770 | 5.218097  | 2.633512  |
| H  | -0.835545 | 4.655633  | 2.109328  |
| H  | -0.039330 | 4.921765  | 3.703786  |
| H  | -0.259382 | 6.303238  | 2.572591  |
| C  | 2.451193  | 5.686149  | 2.681231  |
| H  | 3.427504  | 5.428064  | 2.217620  |
| H  | 2.284926  | 6.779873  | 2.585337  |
| H  | 2.502275  | 5.430476  | 3.761255  |
| C  | 1.723321  | 3.276194  | -2.884739 |
| H  | 2.004556  | 2.313966  | -2.411080 |
| C  | 2.885589  | 3.637553  | -3.817206 |
| H  | 3.133528  | 2.771478  | -4.467647 |
| H  | 2.630983  | 4.501808  | -4.465864 |
| H  | 3.785431  | 3.891410  | -3.218300 |
| C  | 0.440469  | 3.002596  | -3.678430 |
| H  | 0.601661  | 2.163133  | -4.387939 |
| H  | -0.377757 | 2.717478  | -2.983430 |
| H  | 0.125210  | 3.896359  | -4.256803 |
| C  | 5.547965  | 1.136782  | -1.583401 |
| H  | 4.465448  | 1.338128  | -1.696428 |
| C  | 4.359291  | 0.294060  | 3.401656  |
| H  | 3.377466  | 0.722739  | 3.121014  |
| C  | 4.083880  | -1.114744 | 3.942175  |

|    |           |           |           |
|----|-----------|-----------|-----------|
| H  | 3.675459  | -1.761224 | 3.137209  |
| H  | 5.009720  | -1.580800 | 4.340136  |
| H  | 3.333344  | -1.068449 | 4.759846  |
| C  | 4.894257  | 1.212763  | 4.508296  |
| H  | 5.819301  | 0.803527  | 4.965572  |
| H  | 5.111718  | 2.220166  | 4.092908  |
| H  | 4.131437  | 1.326264  | 5.308334  |
| C  | 5.861733  | 0.047029  | -2.615085 |
| H  | 6.950390  | -0.158558 | -2.678994 |
| H  | 5.333392  | -0.885619 | -2.343924 |
| H  | 5.506249  | 0.361353  | -3.619844 |
| C  | 6.280839  | 2.437927  | -1.933079 |
| H  | 6.016932  | 3.233165  | -1.204436 |
| H  | 7.381832  | 2.293906  | -1.921734 |
| H  | 5.985009  | 2.782794  | -2.946399 |
| C  | 1.412721  | -2.595019 | -3.117200 |
| C  | 1.504824  | -1.256525 | -3.652416 |
| H  | 1.082296  | -1.045478 | -4.639447 |
| B  | 2.398688  | -3.208180 | -2.152967 |
| O  | 2.333901  | -4.530580 | -1.711117 |
| O  | 3.516273  | -2.562407 | -1.625191 |
| C  | 3.340197  | -4.690195 | -0.691324 |
| C  | 4.369737  | -3.582238 | -1.073121 |
| C  | 2.681485  | -4.422920 | 0.651464  |
| H  | 1.868796  | -5.146321 | 0.799963  |
| H  | 3.383224  | -4.534016 | 1.489779  |
| H  | 2.257222  | -3.407887 | 0.684998  |
| C  | 3.881896  | -6.102420 | -0.743218 |
| H  | 4.721134  | -6.228027 | -0.043289 |
| H  | 3.101179  | -6.821273 | -0.458757 |
| H  | 4.229596  | -6.368086 | -1.749013 |
| C  | 5.320124  | -4.044415 | -2.169236 |
| H  | 6.039279  | -4.788710 | -1.799293 |
| H  | 4.771544  | -4.487733 | -3.012122 |
| H  | 5.893729  | -3.191701 | -2.554218 |
| C  | 5.150904  | -3.021266 | 0.094769  |
| H  | 4.500724  | -2.531382 | 0.828015  |
| H  | 5.707984  | -3.817146 | 0.610171  |
| H  | 5.882436  | -2.281780 | -0.254451 |
| Na | -5.144585 | 0.887844  | -1.285588 |
| H  | 2.450809  | -0.720912 | -3.501651 |
| H  | 0.613308  | -3.232152 | -3.518919 |
| H  | 0.591018  | -0.021751 | -3.016763 |
| O  | -6.392588 | 1.499269  | 0.676647  |
| O  | -4.203040 | 3.103390  | -1.256627 |
| C  | -7.555826 | 0.823920  | 1.033566  |
| H  | -8.436249 | 1.342135  | 0.597348  |
| H  | -7.517259 | -0.205984 | 0.620645  |
| C  | -5.667286 | 1.754816  | 1.836649  |
| H  | -4.608360 | 1.461019  | 1.693612  |
| H  | -5.702723 | 2.845461  | 2.049123  |
| C  | -6.266219 | 0.984268  | 2.991883  |
| H  | -6.217656 | 1.557872  | 3.942963  |
| H  | -5.746322 | 0.007841  | 3.110176  |
| C  | -7.672910 | 0.765980  | 2.542721  |
| H  | -8.071206 | -0.211661 | 2.891519  |
| H  | -8.322128 | 1.592838  | 2.907396  |
| C  | -3.038160 | 3.151757  | -0.504336 |
| H  | -2.424195 | 2.253488  | -0.730989 |
| H  | -3.289431 | 3.147490  | 0.575974  |
| C  | -3.938791 | 3.788529  | -2.434906 |
| H  | -3.579110 | 3.072309  | -3.205660 |
| H  | -4.872055 | 4.263033  | -2.805541 |
| C  | -2.281660 | 4.416229  | -0.854296 |
| H  | -1.198264 | 4.209550  | -0.954748 |
| H  | -2.441917 | 5.196883  | -0.078198 |
| C  | -2.881411 | 4.841934  | -2.163693 |
| H  | -3.347390 | 5.847409  | -2.068526 |
| H  | -2.118428 | 4.859446  | -2.972566 |
| O  | -3.939934 | 0.281260  | -3.248374 |
| C  | -2.556947 | 0.120105  | -3.235962 |
| H  | -2.194834 | 0.047400  | -2.189521 |
| H  | -2.091345 | 1.013776  | -3.703000 |
| C  | -4.491131 | -0.747588 | -4.003497 |
| H  | -4.970829 | -1.481751 | -3.323911 |
| H  | -5.270417 | -0.337113 | -4.680104 |
| C  | -2.173289 | -1.120816 | -4.017078 |
| H  | -1.943512 | -1.957066 | -3.322894 |
| H  | -1.306364 | -0.935104 | -4.684937 |
| C  | -3.404262 | -1.425886 | -4.804304 |
| H  | -3.334479 | -0.967458 | -5.815725 |
| H  | -3.577587 | -2.520684 | -4.893235 |

178

Figure\_S6\_imid-3\_modeR2\_ts(CuHadd)\_04 / electronic energy: -3601.992424038614 a.u. / lowest freq: -727.14 cm-1

|   |           |           |          |
|---|-----------|-----------|----------|
| C | -0.882739 | -1.759374 | 2.499506 |
| H | -1.679633 | -1.129686 | 2.921766 |
| C | 0.478575  | -1.047597 | 2.451920 |
| H | 1.318083  | -1.768140 | 2.456311 |

|    |           |           |           |
|----|-----------|-----------|-----------|
| C  | -0.419880 | -1.084167 | 0.290174  |
| C  | -2.181666 | -2.716955 | 0.466334  |
| C  | -1.789784 | -3.675198 | -0.476836 |
| C  | -3.546934 | -2.546674 | 0.748817  |
| C  | -2.733104 | -4.467355 | -1.121760 |
| H  | -0.727981 | -3.778582 | -0.710117 |
| C  | -4.485852 | -3.362334 | 0.108733  |
| C  | -4.086731 | -4.318240 | -0.820910 |
| H  | -2.401789 | -5.204763 | -1.856941 |
| H  | -5.542751 | -3.206324 | 0.332510  |
| H  | -4.835755 | -4.939939 | -1.316487 |
| C  | 1.407179  | 0.426493  | 0.617608  |
| C  | 1.172078  | 1.801648  | 0.555655  |
| C  | 2.642297  | -0.087460 | 0.209340  |
| C  | 2.173921  | 2.670384  | 0.113861  |
| C  | 3.664618  | 0.780405  | -0.207037 |
| C  | 3.430635  | 2.163671  | -0.236319 |
| H  | 4.215336  | 2.840737  | -0.551680 |
| S  | -4.174100 | -1.283513 | 1.865541  |
| O  | -5.577552 | -1.045906 | 1.412191  |
| O  | -3.336787 | -0.071807 | 1.621013  |
| O  | -4.064085 | -1.838363 | 3.225696  |
| Cu | -0.318431 | -0.923022 | -1.608974 |
| C  | -0.830641 | -3.072693 | 3.235874  |
| C  | -1.460706 | -3.207297 | 4.485293  |
| C  | -0.128731 | -4.168457 | 2.705828  |
| C  | -1.407008 | -4.421289 | 5.177047  |
| H  | -1.984522 | -2.371099 | 4.930498  |
| C  | -0.077373 | -5.380908 | 3.398325  |
| H  | 0.374251  | -4.080319 | 1.756314  |
| C  | -0.718494 | -5.508297 | 4.632696  |
| H  | -1.896134 | -4.517913 | 6.137670  |
| H  | 0.461358  | -6.220562 | 2.978522  |
| H  | -0.677464 | -6.447102 | 5.169652  |
| C  | 0.671869  | -0.037228 | 3.552819  |
| C  | 1.755829  | -0.161517 | 4.439865  |
| C  | -0.208671 | 1.050804  | 3.698617  |
| C  | 1.944921  | 0.775344  | 5.459907  |
| H  | 2.455411  | -0.982450 | 4.344118  |
| C  | -0.021363 | 1.978797  | 4.725813  |
| H  | -1.037626 | 1.181717  | 3.016689  |
| C  | 1.054078  | 1.841123  | 5.606327  |
| H  | 2.781693  | 0.673457  | 6.138724  |
| H  | -0.706530 | 2.809545  | 4.834547  |
| H  | 1.200846  | 2.564277  | 6.398023  |
| N  | -1.157132 | -1.924969 | 1.047480  |
| N  | 0.405706  | -0.424706 | 1.124592  |
| H  | 2.814533  | -1.154658 | 0.248129  |
| H  | 0.214344  | 2.193975  | 0.862367  |
| C  | 4.995059  | 0.240792  | -0.567166 |
| C  | 5.811170  | -0.358003 | 0.438420  |
| C  | 5.465396  | 0.315290  | -1.913107 |
| C  | 7.045998  | -0.919142 | 0.065894  |
| C  | 6.729306  | -0.222727 | -2.219734 |
| C  | 7.498516  | -0.846634 | -1.245412 |
| H  | 7.678738  | -1.400721 | 0.799612  |
| H  | 7.123500  | -0.172532 | -3.225901 |
| H  | 8.459977  | -1.269403 | -1.507345 |
| C  | 1.888432  | 4.110956  | -0.021598 |
| C  | 1.352564  | 4.611871  | -1.241322 |
| C  | 2.135172  | 4.994082  | 1.065262  |
| C  | 1.081221  | 5.987816  | -1.349439 |
| C  | 1.864438  | 6.365056  | 0.900354  |
| C  | 1.339291  | 6.851921  | -0.291460 |
| H  | 0.670196  | 6.400340  | -2.261395 |
| H  | 2.054535  | 7.066885  | 1.701539  |
| H  | 1.129793  | 7.908768  | -0.395869 |
| C  | 2.680174  | 4.501537  | 2.404926  |
| H  | 2.787372  | 3.397406  | 2.412758  |
| C  | 1.719579  | 4.840240  | 3.551625  |
| H  | 0.704218  | 4.452945  | 3.321182  |
| H  | 2.071732  | 4.367450  | 4.492629  |
| H  | 1.655356  | 5.935726  | 3.718436  |
| C  | 4.078238  | 5.070855  | 2.670073  |
| H  | 4.760026  | 4.803399  | 1.834370  |
| H  | 4.049923  | 6.176326  | 2.771839  |
| H  | 4.492917  | 4.640305  | 3.606616  |
| C  | 1.059732  | 3.703267  | -2.435777 |
| H  | 1.330337  | 2.650489  | -2.216478 |
| C  | 1.893531  | 4.109912  | -3.656074 |
| H  | 1.782562  | 3.352757  | -4.461665 |
| H  | 1.573995  | 5.096367  | -4.053100 |
| H  | 2.966702  | 4.167670  | -3.377217 |
| C  | -0.436267 | 3.693821  | -2.767415 |
| H  | -0.642257 | 2.959491  | -3.574831 |
| H  | -1.015382 | 3.395456  | -1.869317 |
| H  | -0.784156 | 4.693157  | -3.103185 |
| C  | 4.653928  | 0.963279  | -3.038379 |

|    |           |           |           |
|----|-----------|-----------|-----------|
| H  | 3.649817  | 1.269437  | -2.685493 |
| C  | 5.413026  | -0.377207 | 1.917224  |
| H  | 4.463646  | 0.167650  | 2.087714  |
| C  | 5.187491  | -1.811381 | 2.411458  |
| H  | 4.403094  | -2.306816 | 1.801860  |
| H  | 6.120955  | -2.409453 | 2.350689  |
| H  | 4.844019  | -1.800305 | 3.467865  |
| C  | 6.451388  | 0.346788  | 2.784666  |
| H  | 7.418788  | -0.197413 | 2.800913  |
| H  | 6.620828  | 1.373831  | 2.395839  |
| H  | 6.081237  | 0.429697  | 3.829141  |
| C  | 4.397451  | -0.013600 | -4.192408 |
| H  | 5.338010  | -0.293282 | -4.710838 |
| H  | 3.912325  | -0.930061 | -3.807596 |
| H  | 3.713475  | 0.448698  | -4.936106 |
| C  | 5.349869  | 2.230713  | -3.549371 |
| H  | 5.488121  | 2.952243  | -2.716593 |
| H  | 6.342760  | 1.995011  | -3.987154 |
| H  | 4.730818  | 2.717182  | -4.332630 |
| C  | -0.019110 | -2.232536 | -3.177499 |
| C  | 0.092045  | -0.849259 | -3.579084 |
| H  | -0.611267 | -0.449959 | -4.314846 |
| B  | 1.148185  | -3.064222 | -2.706188 |
| O  | 1.078913  | -4.425718 | -2.409302 |
| O  | 2.448483  | -2.586918 | -2.549337 |
| C  | 2.344764  | -4.800678 | -1.827405 |
| C  | 3.310527  | -3.733227 | -2.431013 |
| C  | 2.211801  | -4.663049 | -0.320166 |
| H  | 1.405733  | -5.321720 | 0.031057  |
| H  | 3.131941  | -4.948018 | 0.208761  |
| H  | 1.959194  | -3.627343 | -0.045143 |
| C  | 2.660846  | -6.231203 | -2.206171 |
| H  | 3.663397  | -6.519598 | -1.857227 |
| H  | 1.937768  | -6.916272 | -1.742612 |
| H  | 2.616593  | -6.384327 | -3.291346 |
| C  | 3.780980  | -4.113329 | -3.828151 |
| H  | 4.489880  | -4.952824 | -3.806629 |
| H  | 2.935300  | -4.394308 | -4.471503 |
| H  | 4.290175  | -3.260865 | -4.295970 |
| C  | 4.495822  | -3.385454 | -1.557680 |
| H  | 4.187452  | -2.962106 | -0.595628 |
| H  | 5.114221  | -4.273117 | -1.360512 |
| H  | 5.130429  | -2.646559 | -2.062608 |
| Na | -5.118332 | 1.061956  | 0.424460  |
| H  | 1.104251  | -0.459135 | -3.742566 |
| H  | -0.994235 | -2.717864 | -3.317715 |
| H  | -0.304670 | 0.386604  | -2.530184 |
| O  | -3.966764 | 3.073380  | 0.474655  |
| O  | -7.199004 | 1.244682  | -0.622592 |
| C  | -2.714174 | 2.992541  | 1.075019  |
| H  | -2.831939 | 2.662999  | 2.129209  |
| H  | -2.112368 | 2.233109  | 0.534335  |
| C  | -4.231179 | 4.411877  | 0.222711  |
| H  | -4.789032 | 4.511395  | -0.732141 |
| H  | -4.858565 | 4.820154  | 1.045528  |
| C  | -2.921350 | 5.160868  | 0.145193  |
| H  | -3.020716 | 6.206332  | 0.509656  |
| H  | -2.542980 | 5.158165  | -0.900702 |
| C  | -2.023893 | 4.345669  | 1.021361  |
| H  | -1.001618 | 4.274849  | 0.594877  |
| H  | -1.971003 | 4.790936  | 2.039511  |
| C  | -7.414714 | 2.181629  | -1.622250 |
| H  | -6.606526 | 2.942057  | -1.602153 |
| H  | -8.387845 | 2.690583  | -1.444012 |
| C  | -7.673744 | 0.022470  | -1.089438 |
| H  | -6.933967 | -0.769494 | -0.850697 |
| H  | -8.627122 | -0.223388 | -0.573442 |
| C  | -7.431840 | 1.471077  | -2.954722 |
| H  | -6.405990 | 1.436962  | -3.379560 |
| H  | -8.123129 | 1.962192  | -3.673567 |
| C  | -7.886040 | 0.090531  | -2.593133 |
| H  | -8.963587 | -0.039198 | -2.837086 |
| H  | -7.287630 | -0.681035 | -3.125644 |
| O  | -4.132766 | 0.407621  | -1.618400 |
| C  | -3.424213 | 1.378620  | -2.311127 |
| H  | -2.392487 | 1.433407  | -1.903920 |
| H  | -3.912458 | 2.366235  | -2.174505 |
| C  | -3.948415 | -0.776357 | -2.316649 |
| H  | -3.028009 | -1.282208 | -1.950586 |
| H  | -4.815480 | -1.449212 | -2.150523 |
| C  | -3.398744 | 1.004490  | -3.781180 |
| H  | -2.383025 | 1.143055  | -4.207618 |
| H  | -4.124262 | 1.620238  | -4.356383 |
| C  | -3.811027 | -0.442447 | -3.787456 |
| H  | -4.789624 | -0.563023 | -4.302320 |
| H  | -3.049346 | -1.087344 | -4.276294 |

178

Figure\_S6\_imid-3\_modeR2\_prod(CuHadd) / electronic energy: -3602.034857394928 a.u. / lowest freq: 17.12 cm-1

|    |           |           |           |
|----|-----------|-----------|-----------|
| C  | -1.301429 | -1.887956 | 2.190346  |
| H  | -2.364777 | -1.610176 | 2.233284  |
| C  | -0.356206 | -0.687109 | 2.417476  |
| H  | 0.572806  | -0.981899 | 2.938656  |
| C  | -0.245704 | -1.318483 | 0.158495  |
| C  | -1.498759 | -3.360420 | 0.073233  |
| C  | -0.582498 | -4.231556 | -0.528585 |
| C  | -2.872616 | -3.565538 | -0.127394 |
| C  | -1.015701 | -5.321401 | -1.275613 |
| H  | 0.483209  | -4.025525 | -0.416428 |
| C  | -3.300018 | -4.680100 | -0.856366 |
| C  | -2.382001 | -5.562810 | -1.418978 |
| H  | -0.278031 | -5.978024 | -1.743229 |
| H  | -4.371910 | -4.810646 | -1.016325 |
| H  | -2.735016 | -6.421541 | -1.994018 |
| C  | 0.920116  | 0.686398  | 0.726295  |
| C  | 0.462626  | 1.967336  | 0.414474  |
| C  | 2.297091  | 0.428833  | 0.755866  |
| C  | 1.369628  | 2.996146  | 0.150196  |
| C  | 3.217292  | 1.474396  | 0.563122  |
| C  | 2.743845  | 2.763318  | 0.272929  |
| H  | 3.439810  | 3.578763  | 0.125624  |
| S  | -4.115695 | -2.360291 | 0.355016  |
| O  | -5.228802 | -2.564863 | -0.617120 |
| O  | -3.464687 | -1.034798 | 0.136530  |
| O  | -4.476166 | -2.638060 | 1.757718  |
| Cu | 0.556427  | -1.598496 | -1.560242 |
| C  | -1.038231 | -3.033832 | 3.133623  |
| C  | -2.033891 | -3.456407 | 4.031580  |
| C  | 0.201214  | -3.699709 | 3.126862  |
| C  | -1.795783 | -4.527859 | 4.897849  |
| H  | -2.993011 | -2.956183 | 4.066093  |
| C  | 0.435063  | -4.770603 | 3.993290  |
| H  | 0.984746  | -3.387271 | 2.451670  |
| C  | -0.563285 | -5.185484 | 4.877648  |
| H  | -2.567456 | -4.848014 | 5.585923  |
| H  | 1.390959  | -5.278106 | 3.979146  |
| H  | -0.381243 | -6.014830 | 5.548776  |
| C  | -1.002359 | 0.452882  | 3.163428  |
| C  | -0.460505 | 0.898029  | 4.382402  |
| C  | -2.144137 | 1.094870  | 2.651237  |
| C  | -1.060421 | 1.951468  | 5.079330  |
| H  | 0.424374  | 0.430343  | 4.796204  |
| C  | -2.743082 | 2.144147  | 3.351756  |
| H  | -2.567462 | 0.784675  | 1.709255  |
| C  | -2.204310 | 2.569413  | 4.567878  |
| H  | -0.638396 | 2.288486  | 6.017201  |
| H  | -3.620871 | 2.631772  | 2.947784  |
| H  | -2.666268 | 3.385457  | 5.108153  |
| N  | -0.973490 | -2.254527 | 0.791433  |
| N  | -0.011442 | -0.327160 | 1.031342  |
| H  | 2.647853  | -0.567336 | 0.987869  |
| H  | -0.597722 | 2.163422  | 0.376756  |
| C  | 4.670715  | 1.232787  | 0.741447  |
| C  | 5.171852  | 0.859745  | 2.026145  |
| C  | 5.576531  | 1.382752  | -0.354541 |
| C  | 6.541885  | 0.573675  | 2.165561  |
| C  | 6.946281  | 1.139553  | -0.140543 |
| C  | 7.415794  | 0.718767  | 1.096673  |
| H  | 6.947760  | 0.260559  | 3.118360  |
| H  | 7.662932  | 1.262908  | -0.941314 |
| H  | 8.470515  | 0.516263  | 1.232085  |
| C  | 0.872240  | 4.303550  | -0.314353 |
| C  | 0.686840  | 4.528896  | -1.707929 |
| C  | 0.529914  | 5.314420  | 0.624752  |
| C  | 0.156256  | 5.761197  | -2.130601 |
| C  | 0.018839  | 6.536255  | 0.149817  |
| C  | -0.169583 | 6.751828  | -1.210981 |
| H  | -0.008823 | 5.961002  | -3.181085 |
| H  | -0.246290 | 7.329109  | 0.836698  |
| H  | -0.573481 | 7.694970  | -1.556001 |
| C  | 0.688657  | 5.111245  | 2.130545  |
| H  | 1.069538  | 4.095058  | 2.360106  |
| C  | -0.661145 | 5.230501  | 2.847715  |
| H  | -1.396401 | 4.538530  | 2.384910  |
| H  | -0.546772 | 4.957298  | 3.918255  |
| H  | -1.059939 | 6.265037  | 2.792550  |
| C  | 1.712483  | 6.091942  | 2.713625  |
| H  | 2.683091  | 5.985056  | 2.183342  |
| H  | 1.364449  | 7.142167  | 2.619263  |
| H  | 1.879555  | 5.871712  | 3.789737  |
| C  | 1.031295  | 3.470223  | -2.758085 |
| H  | 1.484651  | 2.572254  | -2.291903 |
| C  | 2.073105  | 3.993362  | -3.754037 |
| H  | 2.427777  | 3.163725  | -4.402725 |
| H  | 1.649551  | 4.789112  | -4.402068 |
| H  | 2.947139  | 4.404140  | -3.206145 |
| C  | -0.228284 | 2.981440  | -3.482051 |



|    |           |           |           |
|----|-----------|-----------|-----------|
| H  | 0.035801  | 2.199856  | -4.225368 |
| H  | -0.931711 | 2.533896  | -2.749560 |
| H  | -0.739053 | 3.812300  | -4.012386 |
| C  | 5.125457  | 1.813225  | -1.752883 |
| H  | 4.020610  | 1.842253  | -1.822471 |
| C  | 4.285587  | 0.805430  | 3.274470  |
| H  | 3.255027  | 1.144920  | 3.054144  |
| C  | 4.171599  | -0.626990 | 3.811198  |
| H  | 3.782387  | -1.303301 | 3.021728  |
| H  | 5.157056  | -1.007073 | 4.153665  |
| H  | 3.463972  | -0.656978 | 4.667228  |
| C  | 4.792615  | 1.761340  | 4.363079  |
| H  | 5.772651  | 1.434224  | 4.768929  |
| H  | 4.897282  | 2.787065  | 3.948808  |
| H  | 4.065111  | 1.800262  | 5.202126  |
| C  | 5.580511  | 0.823958  | -2.834894 |
| H  | 6.678153  | 0.866109  | -2.994125 |
| H  | 5.305027  | -0.207264 | -2.549736 |
| H  | 5.082345  | 1.062064  | -3.799117 |
| C  | 5.637765  | 3.222606  | -2.076597 |
| H  | 5.278363  | 3.949124  | -1.318927 |
| H  | 6.747980  | 3.249743  | -2.093354 |
| H  | 5.265419  | 3.544850  | -3.071964 |
| C  | 1.642965  | -1.930876 | -3.165004 |
| C  | 2.069765  | -0.644661 | -3.852855 |
| H  | 2.722821  | -0.805750 | -4.733020 |
| B  | 2.668380  | -2.638034 | -2.296944 |
| O  | 2.643239  | -3.989397 | -1.908112 |
| O  | 3.775729  | -2.002180 | -1.725471 |
| C  | 3.635220  | -4.164848 | -0.878464 |
| C  | 4.639380  | -3.009207 | -1.187534 |
| C  | 2.955704  | -3.975107 | 0.469425  |
| H  | 2.176672  | -4.737728 | 0.605974  |
| H  | 3.656869  | -4.073058 | 1.309999  |
| H  | 2.479841  | -2.983145 | 0.527029  |
| C  | 4.217244  | -5.558501 | -0.981149 |
| H  | 5.045654  | -5.694328 | -0.270194 |
| H  | 3.450220  | -6.309756 | -0.746030 |
| H  | 4.591350  | -5.770029 | -1.990226 |
| C  | 5.642463  | -3.395479 | -2.266683 |
| H  | 6.378707  | -4.125797 | -1.901873 |
| H  | 5.137583  | -3.825682 | -3.143184 |
| H  | 6.190294  | -2.503749 | -2.598931 |
| C  | 5.362497  | -2.453823 | 0.021405  |
| H  | 4.666983  | -2.011324 | 0.743717  |
| H  | 5.941253  | -3.235707 | 0.534408  |
| H  | 6.065804  | -1.670020 | -0.288524 |
| Na | -4.803944 | -0.413957 | -1.716370 |
| H  | 2.644712  | 0.000682  | -3.170987 |
| H  | 1.060466  | -2.613251 | -3.807562 |
| H  | 1.231491  | -0.025171 | -4.210608 |
| O  | -6.472275 | 0.513274  | -0.260683 |
| O  | -4.081105 | 1.893888  | -1.971273 |
| C  | -6.436959 | 0.388853  | 1.126137  |
| H  | -7.070838 | -0.469300 | 1.437344  |
| H  | -5.394829 | 0.186925  | 1.447818  |
| C  | -7.199932 | 1.657074  | -0.556163 |
| H  | -6.802210 | 2.131758  | -1.476764 |
| H  | -8.262633 | 1.378897  | -0.732902 |
| C  | -7.097460 | 2.606204  | 0.613300  |
| H  | -8.008045 | 3.235529  | 0.715498  |
| H  | -6.198247 | 3.251385  | 0.502309  |
| C  | -6.923855 | 1.675673  | 1.772836  |
| H  | -6.186386 | 2.074164  | 2.503644  |
| H  | -7.899439 | 1.505862  | 2.279818  |
| C  | -3.397554 | 2.127802  | -0.783130 |
| H  | -2.479319 | 1.505660  | -0.765666 |
| H  | -4.042601 | 1.821746  | 0.065078  |
| C  | -4.134173 | 3.087591  | -2.678194 |
| H  | -3.356973 | 3.075880  | -3.472804 |
| H  | -5.128517 | 3.193562  | -3.161054 |
| C  | -3.060224 | 3.601821  | -0.655401 |
| H  | -1.982079 | 3.769796  | -0.857391 |
| H  | -3.317332 | 3.999674  | 0.350658  |
| C  | -3.884834 | 4.236318  | -1.727847 |
| H  | -4.848704 | 4.597315  | -1.305844 |
| H  | -3.346869 | 5.073998  | -2.223223 |
| O  | -3.009010 | -1.098264 | -3.124145 |
| C  | -2.143773 | -0.261358 | -3.814115 |
| H  | -1.226763 | -0.094703 | -3.205367 |
| H  | -2.632570 | 0.718007  | -3.993764 |
| C  | -2.650951 | -2.391582 | -3.477536 |
| H  | -1.864415 | -2.756661 | -2.782348 |
| H  | -3.534987 | -3.059109 | -3.400933 |
| C  | -1.794761 | -0.922743 | -5.133118 |
| H  | -0.723026 | -0.779807 | -5.386381 |
| H  | -2.428270 | -0.512773 | -5.950429 |
| C  | -2.118832 | -2.372435 | -4.897165 |

H -2.899146 -2.718033 -5.610550  
H -1.214907 -3.012891 -4.992169  
170

Figure\_S7\_imid-3\_modeA.ed(AS) / electronic energy: -4442.760227951429 a.u. / lowest freq: 13.95 cm<sup>-1</sup>

C -0.723232 -0.908750 3.111383  
H -1.061383 -0.014647 3.657443  
C 0.756342 -0.836504 2.699020  
H 1.230023 -1.833744 2.679116  
C -0.584276 -0.514379 0.790347  
C -2.791070 -1.111550 1.600497  
C -3.196820 -2.281682 0.951265  
C -3.762985 -0.203338 2.056144  
C -4.549334 -2.578100 0.800790  
H -2.417593 -2.954953 0.579506  
C -5.116992 -0.502443 1.887465  
C -5.511982 -1.691933 1.279301  
H -4.851769 -3.503125 0.302730  
H -5.855180 0.218954 2.243102  
H -6.575089 -1.917309 1.168047  
S -3.342412 1.331516 2.887141  
O -4.565248 2.183488 2.801767  
O -2.221444 1.945541 2.110710  
O -2.983426 0.957200 4.269628  
Cu -1.144253 -0.488376 -1.116134  
C -1.058216 -2.144084 3.908675  
C -1.531393 -2.026265 5.227583  
C -0.907920 -3.427428 3.349506  
C -1.851101 -3.167374 5.968985  
H -1.650219 -1.053182 5.686244  
C -1.227474 -4.565348 4.096056  
H -0.545405 -3.545533 2.336417  
C -1.699893 -4.435487 5.403784  
H -2.214902 -3.068161 6.983507  
H -1.107782 -5.549300 3.662810  
H -1.946884 -5.317723 5.980015  
N -1.395860 -0.907894 1.786042  
N 0.639201 -0.346753 1.314065  
C -2.339573 0.357031 -2.528139  
C -3.376736 -0.577569 -2.973015  
C -3.326548 -1.109616 -4.275452  
C -4.464244 -0.947238 -2.157862  
C -4.309807 -1.977487 -4.740128  
C -5.446133 -1.816596 -2.622490  
C -5.377244 -2.338282 -3.915929  
H -4.245357 -2.372043 -5.757395  
H -6.279011 -2.087594 -1.967037  
H -6.150782 -3.019112 -4.279006  
C -2.383591 1.113876 -1.337146  
C -1.614761 2.375138 -1.226083  
H -1.379190 2.622756 -0.181047  
H -0.684464 2.345975 -1.809544  
H -4.541096 -0.547440 -1.143179  
H -3.227935 1.021147 -0.642748  
P -3.144128 4.493704 -0.855852  
O -4.356683 3.665762 -0.176518  
O -2.415147 5.141313 0.271837  
O -3.779806 5.444312 -1.974199  
O -2.358864 3.508094 -1.818019  
Na -3.269467 4.137532 2.229282  
H -1.655427 0.697659 -3.316873  
H -2.502170 -0.819903 -4.933038  
C -5.315090 2.938768 -0.943215  
H -5.741201 2.173964 -0.283419  
H -6.114509 3.606836 -1.292367  
H -4.846617 2.448874 -1.809287  
C -4.460826 6.632436 -1.570686  
H -4.790303 7.136156 -2.484015  
H -5.340817 6.396066 -0.955079  
H -3.792709 7.298233 -1.008835  
C 1.747871 0.026521 0.521343  
C 2.887455 -0.786177 0.460294  
C 1.738451 1.253245 -0.154039  
C 4.004792 -0.375408 -0.275338  
C 2.865792 1.683642 -0.866508  
C 3.999703 0.863756 -0.925999  
H 4.876744 1.189842 -1.472509  
H 0.881914 1.902857 -0.064053  
H 2.903265 -1.740750 0.971148  
C 2.880020 3.016043 -1.512064  
C 2.862371 3.123458 -2.933867  
C 2.947461 4.195490 -0.712943  
C 2.952324 4.399286 -3.520733  
C 2.998248 5.448011 -1.352482  
C 3.011694 5.544801 -2.737829  
H 2.967285 4.515059 -4.596269  
H 3.041218 6.362841 -0.776399  
H 3.066656 6.517606 -3.209543  
C 5.184459 -1.252480 -0.369415

|   |           |           |           |
|---|-----------|-----------|-----------|
| C | 6.257217  | -1.101825 | 0.552175  |
| C | 5.241584  | -2.253395 | -1.378887 |
| C | 7.370843  | -1.954335 | 0.440078  |
| C | 6.369468  | -3.091880 | -1.438334 |
| C | 7.421295  | -2.939157 | -0.541043 |
| H | 8.208235  | -1.862216 | 1.119111  |
| H | 6.441305  | -3.869419 | -2.187418 |
| H | 8.283896  | -3.589830 | -0.606903 |
| C | 4.117285  | -2.445060 | -2.398360 |
| H | 3.318378  | -1.689688 | -2.260560 |
| C | 3.446414  | -3.812983 | -2.226696 |
| H | 3.059481  | -3.916663 | -1.190188 |
| H | 2.588738  | -3.908219 | -2.925828 |
| H | 4.158794  | -4.639852 | -2.430229 |
| C | 4.625441  | -2.251475 | -3.832255 |
| H | 5.129964  | -1.265990 | -3.925233 |
| H | 5.339672  | -3.051020 | -4.120308 |
| H | 3.772141  | -2.271160 | -4.543496 |
| C | 6.237630  | -0.044071 | 1.656731  |
| H | 5.290841  | 0.533603  | 1.644015  |
| C | 7.362029  | 0.978858  | 1.458133  |
| H | 7.275987  | 1.789881  | 2.212707  |
| H | 8.360911  | 0.505158  | 1.562253  |
| H | 7.283193  | 1.436298  | 0.448529  |
| C | 6.315903  | -0.688747 | 3.045984  |
| H | 6.209170  | 0.089613  | 3.831191  |
| H | 5.491165  | -1.422852 | 3.169852  |
| H | 7.285773  | -1.206613 | 3.199009  |
| C | 2.974698  | 4.154181  | 0.816143  |
| H | 2.985671  | 3.113731  | 1.194809  |
| C | 2.735313  | 1.903822  | -3.847205 |
| H | 2.587277  | 0.977898  | -3.256504 |
| C | 1.508829  | 2.017422  | -4.764733 |
| H | 0.590986  | 2.162737  | -4.155880 |
| H | 1.606279  | 2.863730  | -5.475775 |
| H | 1.390502  | 1.086726  | -5.359426 |
| C | 4.013679  | 1.697745  | -4.667743 |
| H | 4.185094  | 2.545963  | -5.363665 |
| H | 4.889869  | 1.605596  | -3.991456 |
| H | 3.936717  | 0.762653  | -5.262809 |
| C | 1.719029  | 4.815589  | 1.398231  |
| H | 1.666237  | 5.890817  | 1.126949  |
| H | 0.809306  | 4.303759  | 1.017232  |
| H | 1.722715  | 4.737700  | 2.504493  |
| C | 4.250031  | 4.800293  | 1.372447  |
| H | 5.145306  | 4.323223  | 0.918863  |
| H | 4.277505  | 5.890582  | 1.165806  |
| H | 4.300143  | 4.652505  | 2.472712  |
| H | 0.456008  | 1.878980  | 3.055720  |
| H | 1.821194  | 3.371686  | 4.469569  |
| C | 1.281256  | 1.466490  | 3.622756  |
| C | 2.057997  | 2.318074  | 4.413831  |
| C | 1.574194  | 0.090877  | 3.561101  |
| C | 3.139318  | 1.810889  | 5.137442  |
| H | 3.741198  | 2.472952  | 5.746307  |
| C | 2.665800  | -0.408449 | 4.293421  |
| C | 3.442355  | 0.449089  | 5.077632  |
| H | 2.918942  | -1.460713 | 4.257323  |
| H | 4.279983  | 0.056978  | 5.639691  |
| C | 0.058334  | -1.846594 | -2.062704 |
| H | 0.953035  | -1.712659 | -1.432455 |
| C | 0.336447  | -1.482696 | -3.506376 |
| H | 0.606458  | -0.424627 | -3.643678 |
| H | 1.160528  | -2.066993 | -3.958371 |
| H | -0.541536 | -1.665074 | -4.145554 |
| B | -0.535536 | -3.222043 | -1.821462 |
| O | -0.602435 | -3.870399 | -0.581588 |
| O | -1.078872 | -4.025348 | -2.820457 |
| C | -1.725939 | -5.142035 | -2.184582 |
| C | -0.944894 | -5.245884 | -0.838166 |
| C | -3.182701 | -4.756324 | -1.985507 |
| H | -3.266922 | -3.863750 | -1.348076 |
| H | -3.627626 | -4.500352 | -2.956775 |
| H | -3.776479 | -5.566171 | -1.536892 |
| C | -1.612120 | -6.361767 | -3.073468 |
| H | -0.572271 | -6.562659 | -3.359728 |
| H | -2.009596 | -7.254776 | -2.568693 |
| H | -2.190490 | -6.216044 | -3.996202 |
| C | 0.359828  | -6.017400 | -0.980405 |
| H | 0.193070  | -7.097811 | -1.094416 |
| H | 0.938511  | -5.666915 | -1.846400 |
| H | 0.973262  | -5.862891 | -0.082385 |
| C | -1.754195 | -5.798631 | 0.315084  |
| H | -1.133394 | -5.863308 | 1.218154  |
| H | -2.627710 | -5.177312 | 0.550463  |
| H | -2.111678 | -6.813854 | 0.087881  |

170

Figure\_S7\_imid-3\_modeA\_ts(AS)\_01 / electronic energy: -4442.745684459335 a.u. / lowest freq: -257.30 cm-1

|    |           |           |           |
|----|-----------|-----------|-----------|
| C  | -0.680165 | -0.493719 | 3.192983  |
| H  | -0.906247 | 0.489177  | 3.631638  |
| C  | 0.781877  | -0.622641 | 2.735351  |
| H  | 1.154781  | -1.658707 | 2.818965  |
| C  | -0.590985 | -0.415554 | 0.840399  |
| C  | -2.812497 | -0.661801 | 1.744098  |
| C  | -3.334774 | -1.802315 | 1.125149  |
| C  | -3.680160 | 0.367925  | 2.150136  |
| C  | -4.707356 | -1.939317 | 0.932210  |
| H  | -2.632496 | -2.583057 | 0.813806  |
| C  | -5.054552 | 0.219389  | 1.948574  |
| C  | -5.570181 | -0.927361 | 1.349347  |
| H  | -5.103124 | -2.839891 | 0.455325  |
| H  | -5.713360 | 1.030638  | 2.263869  |
| H  | -6.648237 | -1.026525 | 1.205780  |
| S  | -3.112401 | 1.882219  | 2.940092  |
| O  | -4.224986 | 2.859496  | 2.783934  |
| O  | -1.908696 | 2.323065  | 2.166741  |
| O  | -2.827080 | 1.517309  | 4.340168  |
| Cu | -1.254356 | -0.693785 | -1.030793 |
| C  | -1.095163 | -1.583651 | 4.147333  |
| C  | -1.425594 | -1.268383 | 5.477057  |
| C  | -1.148855 | -2.927215 | 3.730606  |
| C  | -1.816093 | -2.273693 | 6.366333  |
| H  | -1.373526 | -0.246720 | 5.830596  |
| C  | -1.540088 | -3.928834 | 4.624069  |
| H  | -0.889768 | -3.197073 | 2.715093  |
| C  | -1.875543 | -3.602200 | 5.939771  |
| H  | -2.070048 | -2.022614 | 7.388046  |
| H  | -1.581994 | -4.959627 | 4.298985  |
| H  | -2.177566 | -4.379199 | 6.630026  |
| N  | -1.401161 | -0.590055 | 1.896576  |
| N  | 0.659220  | -0.300661 | 1.300345  |
| C  | -2.478012 | -0.238733 | -2.617927 |
| C  | -3.426460 | -1.229176 | -3.133638 |
| C  | -3.176381 | -1.878199 | -4.357522 |
| C  | -4.634826 | -1.525708 | -2.473496 |
| C  | -4.078073 | -2.798814 | -4.883674 |
| C  | -5.538182 | -2.440886 | -3.001712 |
| C  | -5.263993 | -3.088738 | -4.207508 |
| H  | -3.857066 | -3.286847 | -5.836026 |
| H  | -6.468903 | -2.648706 | -2.466621 |
| H  | -5.973998 | -3.808145 | -4.621939 |
| C  | -2.757166 | 0.630365  | -1.526222 |
| C  | -1.962755 | 1.757546  | -1.239562 |
| H  | -1.996892 | 2.183773  | -0.233406 |
| H  | -1.018137 | 1.878437  | -1.772871 |
| H  | -4.882380 | -1.021861 | -1.537231 |
| H  | -3.649367 | 0.467803  | -0.911869 |
| P  | -3.022838 | 4.464753  | -1.286695 |
| O  | -4.194294 | 4.032056  | -0.210200 |
| O  | -1.989468 | 5.099590  | -0.401584 |
| O  | -3.755476 | 5.498031  | -2.299498 |
| O  | -2.705641 | 3.264279  | -2.192178 |
| Na | -2.775367 | 4.544483  | 1.733880  |
| H  | -1.718572 | 0.096764  | -3.337889 |
| H  | -2.265607 | -1.636814 | -4.911512 |
| C  | -5.342693 | 3.314927  | -0.623494 |
| H  | -5.912338 | 3.060185  | 0.277414  |
| H  | -5.974813 | 3.922525  | -1.289684 |
| H  | -5.069163 | 2.388553  | -1.151903 |
| C  | -4.127609 | 6.777977  | -1.812421 |
| H  | -4.460154 | 7.373533  | -2.669467 |
| H  | -4.956838 | 6.706255  | -1.090964 |
| H  | -3.280030 | 7.285717  | -1.329998 |
| C  | 1.756582  | -0.008717 | 0.459153  |
| C  | 2.912481  | -0.798120 | 0.502311  |
| C  | 1.723767  | 1.124864  | -0.364554 |
| C  | 4.023300  | -0.460889 | -0.278335 |
| C  | 2.849544  | 1.490297  | -1.114604 |
| C  | 3.998665  | 0.690922  | -1.072894 |
| H  | 4.871108  | 0.964551  | -1.654643 |
| H  | 0.849690  | 1.760937  | -0.364936 |
| H  | 2.944001  | -1.680954 | 1.129024  |
| C  | 2.845843  | 2.741112  | -1.904578 |
| C  | 2.816320  | 2.688871  | -3.328608 |
| C  | 2.895497  | 4.002189  | -1.240928 |
| C  | 2.864727  | 3.893465  | -4.054201 |
| C  | 2.907281  | 5.177178  | -2.015064 |
| C  | 2.901948  | 5.120102  | -3.403114 |
| H  | 2.863073  | 3.888819  | -5.136122 |
| H  | 2.932051  | 6.150694  | -1.543575 |
| H  | 2.925171  | 6.035779  | -3.980051 |
| C  | 5.211402  | -1.331066 | -0.277349 |
| C  | 6.311993  | -1.032206 | 0.572370  |
| C  | 5.250002  | -2.471476 | -1.127274 |
| C  | 7.437583  | -1.875805 | 0.543824  |
| C  | 6.389386  | -3.295967 | -1.102635 |

|                        |                                                                                    |           |           |
|------------------------|------------------------------------------------------------------------------------|-----------|-----------|
| C                      | 7.470542                                                                           | -2.996089 | -0.280271 |
| H                      | 8.297495                                                                           | -1.671627 | 1.168042  |
| H                      | 6.448231                                                                           | -4.176249 | -1.729114 |
| H                      | 8.342293                                                                           | -3.637833 | -0.281690 |
| C                      | 4.095481                                                                           | -2.824193 | -2.067723 |
| H                      | 3.288297                                                                           | -2.066821 | -2.013958 |
| C                      | 3.452447                                                                           | -4.159751 | -1.675093 |
| H                      | 3.106042                                                                           | -4.117207 | -0.620095 |
| H                      | 2.570038                                                                           | -4.362900 | -2.318585 |
| H                      | 4.169750                                                                           | -4.999933 | -1.785861 |
| C                      | 4.552832                                                                           | -2.835805 | -3.531541 |
| H                      | 5.027144                                                                           | -1.864063 | -3.787393 |
| H                      | 5.278794                                                                           | -3.653582 | -3.722694 |
| H                      | 3.678835                                                                           | -2.980130 | -4.201964 |
| C                      | 6.308425                                                                           | 0.173342  | 1.513579  |
| H                      | 5.343632                                                                           | 0.718606  | 1.464821  |
| C                      | 7.390544                                                                           | 1.183295  | 1.115552  |
| H                      | 7.316402                                                                           | 2.090931  | 1.752166  |
| H                      | 8.406833                                                                           | 0.751530  | 1.233229  |
| H                      | 7.249754                                                                           | 1.490991  | 0.057148  |
| C                      | 6.468858                                                                           | -0.260450 | 2.975855  |
| H                      | 6.361139                                                                           | 0.619220  | 3.645716  |
| H                      | 5.681349                                                                           | -0.998153 | 3.240606  |
| H                      | 7.464790                                                                           | -0.715599 | 3.157791  |
| C                      | 2.941084                                                                           | 4.127833  | 0.283484  |
| H                      | 2.992823                                                                           | 3.134690  | 0.770984  |
| C                      | 2.716746                                                                           | 1.371463  | -4.097989 |
| H                      | 2.615319                                                                           | 0.512322  | -3.405963 |
| C                      | 1.468682                                                                           | 1.340488  | -4.991655 |
| H                      | 0.560545                                                                           | 1.535588  | -4.381599 |
| H                      | 1.527592                                                                           | 2.097157  | -5.801411 |
| H                      | 1.363524                                                                           | 0.340281  | -5.463670 |
| C                      | 3.986137                                                                           | 1.116823  | -4.918757 |
| H                      | 4.113556                                                                           | 1.884716  | -5.710714 |
| H                      | 4.877176                                                                           | 1.132993  | -4.255608 |
| H                      | 3.932725                                                                           | 0.117259  | -5.400973 |
| C                      | 1.669326                                                                           | 4.804727  | 0.809196  |
| H                      | 1.574168                                                                           | 5.840908  | 0.422045  |
| H                      | 0.776441                                                                           | 4.221438  | 0.499284  |
| H                      | 1.685620                                                                           | 4.847498  | 1.917632  |
| C                      | 4.198793                                                                           | 4.872284  | 0.749577  |
| H                      | 5.105321                                                                           | 4.380898  | 0.335389  |
| H                      | 4.184981                                                                           | 5.935034  | 0.429425  |
| H                      | 4.266493                                                                           | 4.843196  | 1.858410  |
| H                      | 0.827060                                                                           | 2.132492  | 2.695292  |
| H                      | 2.396725                                                                           | 3.630408  | 3.873403  |
| C                      | 1.599421                                                                           | 1.706395  | 3.322688  |
| C                      | 2.490634                                                                           | 2.558621  | 3.981575  |
| C                      | 1.717099                                                                           | 0.310513  | 3.461752  |
| C                      | 3.504854                                                                           | 2.029130  | 4.782117  |
| H                      | 4.194815                                                                           | 2.690737  | 5.289562  |
| C                      | 2.742858                                                                           | -0.211065 | 4.269474  |
| C                      | 3.628352                                                                           | 0.646009  | 4.928659  |
| H                      | 2.859737                                                                           | -1.280876 | 4.389559  |
| H                      | 4.414908                                                                           | 0.236791  | 5.549332  |
| C                      | -0.024145                                                                          | -2.138194 | -1.763927 |
| H                      | 0.840584                                                                           | -1.964894 | -1.105912 |
| C                      | 0.332133                                                                           | -1.929025 | -3.215574 |
| H                      | 0.641712                                                                           | -0.898193 | -3.441073 |
| H                      | 1.166040                                                                           | -2.576119 | -3.542655 |
| H                      | -0.508446                                                                          | -2.164385 | -3.883629 |
| B                      | -0.696303                                                                          | -3.453065 | -1.381883 |
| O                      | -0.794882                                                                          | -3.926588 | -0.076085 |
| O                      | -1.261523                                                                          | -4.336861 | -2.283051 |
| C                      | -1.965678                                                                          | -5.341788 | -1.520967 |
| C                      | -1.200284                                                                          | -5.311162 | -0.159643 |
| C                      | -3.404045                                                                          | -4.871521 | -1.389659 |
| H                      | -3.455350                                                                          | -3.910134 | -0.856811 |
| H                      | -3.828499                                                                          | -4.709966 | -2.389727 |
| H                      | -4.035621                                                                          | -5.598961 | -0.860323 |
| C                      | -1.896344                                                                          | -6.662148 | -2.255910 |
| H                      | -0.863299                                                                          | -6.939124 | -2.499210 |
| H                      | -2.338756                                                                          | -7.470285 | -1.655213 |
| H                      | -2.457810                                                                          | -6.602126 | -3.198362 |
| C                      | 0.067923                                                                           | -6.150107 | -0.187990 |
| H                      | -0.151380                                                                          | -7.226751 | -0.180486 |
| H                      | 0.673509                                                                           | -5.929517 | -1.078056 |
| H                      | 0.677024                                                                           | -5.922064 | 0.697047  |
| C                      | -2.044542                                                                          | -5.665508 | 1.044403  |
| H                      | -1.429078                                                                          | -5.660372 | 1.953164  |
| H                      | -2.871939                                                                          | -4.960266 | 1.193248  |
| H                      | -2.469519                                                                          | -6.674331 | 0.940012  |
| 170                    |                                                                                    |           |           |
| Figure_S7_imid-3_modeA | ts(AS)_02 / electronic energy: -4442.747892119929 a.u. / lowest freq: -262.85 cm-1 |           |           |
| C                      | -1.124466                                                                          | -0.696457 | 3.157928  |
| H                      | -1.212212                                                                          | 0.249834  | 3.711285  |
| C                      | 0.322984                                                                           | -1.020786 | 2.749278  |
| H                      | 0.518665                                                                           | -2.107221 | 2.742615  |

|    |           |           |           |
|----|-----------|-----------|-----------|
| C  | -0.879095 | -0.381691 | 0.833417  |
| C  | -3.162783 | -0.355186 | 1.603953  |
| C  | -3.782431 | -1.290120 | 0.765963  |
| C  | -3.918892 | 0.700050  | 2.143156  |
| C  | -5.143522 | -1.200192 | 0.486537  |
| H  | -3.165081 | -2.096364 | 0.353526  |
| C  | -5.282813 | 0.781148  | 1.850917  |
| C  | -5.897743 | -0.164219 | 1.034232  |
| H  | -5.618047 | -1.944433 | -0.158341 |
| H  | -5.850629 | 1.615664  | 2.265887  |
| H  | -6.966000 | -0.086093 | 0.822540  |
| S  | -3.223641 | 1.978473  | 3.201945  |
| O  | -4.180440 | 3.119475  | 3.112662  |
| O  | -1.908948 | 2.356030  | 2.593310  |
| O  | -3.120473 | 1.379437  | 4.543204  |
| Cu | -1.441549 | -0.254778 | -1.087968 |
| C  | -1.769868 | -1.808304 | 3.944390  |
| C  | -2.093030 | -1.619007 | 5.299369  |
| C  | -2.041466 | -3.052657 | 3.344991  |
| C  | -2.693620 | -2.645867 | 6.033436  |
| H  | -1.872479 | -0.681083 | 5.792343  |
| C  | -2.643337 | -4.076069 | 4.083128  |
| H  | -1.789226 | -3.227065 | 2.307019  |
| C  | -2.971291 | -3.872093 | 5.425243  |
| H  | -2.940999 | -2.491624 | 7.075761  |
| H  | -2.854625 | -5.029034 | 3.616945  |
| H  | -3.436183 | -4.665958 | 5.995370  |
| N  | -1.769181 | -0.510213 | 1.830301  |
| N  | 0.342722  | -0.545864 | 1.351855  |
| C  | -2.390206 | 0.706091  | -2.623869 |
| C  | -3.312605 | -0.036633 | -3.484643 |
| C  | -2.975275 | -0.280029 | -4.828974 |
| C  | -4.560720 | -0.497789 | -3.026827 |
| C  | -3.838973 | -0.971702 | -5.673193 |
| C  | -5.428286 | -1.177622 | -3.873351 |
| C  | -5.070390 | -1.426245 | -5.200194 |
| H  | -3.552412 | -1.148951 | -6.712562 |
| H  | -6.390848 | -1.527472 | -3.490645 |
| H  | -5.750750 | -1.965512 | -5.863254 |
| C  | -2.761530 | 1.314527  | -1.393324 |
| C  | -1.934511 | 2.237007  | -0.720802 |
| H  | -2.064009 | 2.385789  | 0.353582  |
| H  | -0.918097 | 2.380055  | -1.093360 |
| H  | -4.855858 | -0.324758 | -1.989258 |
| H  | -3.750560 | 1.116753  | -0.965496 |
| P  | -1.595300 | 5.154661  | -0.803612 |
| O  | -2.048826 | 6.351389  | -1.809655 |
| O  | -1.520760 | 5.596937  | 0.629241  |
| O  | -0.071392 | 4.807060  | -1.271005 |
| O  | -2.525574 | 3.995237  | -1.218176 |
| Na | -2.587160 | 4.718490  | 2.369205  |
| H  | -1.510620 | 1.122209  | -3.137001 |
| H  | -2.022225 | 0.093523  | -5.213157 |
| C  | -1.445373 | 7.623896  | -1.644320 |
| H  | -1.879388 | 8.296017  | -2.392880 |
| H  | -1.635043 | 8.034058  | -0.641591 |
| H  | -0.355857 | 7.577512  | -1.800859 |
| C  | 0.163480  | 4.419008  | -2.612519 |
| H  | 0.678694  | 5.221800  | -3.159758 |
| H  | 0.804661  | 3.528673  | -2.612844 |
| H  | -0.768462 | 4.172702  | -3.143248 |
| C  | 1.524816  | -0.402296 | 0.588448  |
| C  | 2.506371  | -1.401708 | 0.607932  |
| C  | 1.755292  | 0.776913  | -0.134730 |
| C  | 3.709809  | -1.219576 | -0.081374 |
| C  | 2.982242  | 0.986789  | -0.781166 |
| C  | 3.958926  | -0.016906 | -0.751416 |
| H  | 4.908130  | 0.134424  | -1.251153 |
| H  | 1.012471  | 1.561219  | -0.129185 |
| H  | 2.329547  | -2.326836 | 1.142401  |
| C  | 3.271705  | 2.283425  | -1.436315 |
| C  | 3.408820  | 2.358596  | -2.854700 |
| C  | 3.439431  | 3.459101  | -0.644698 |
| C  | 3.735554  | 3.595418  | -3.441233 |
| C  | 3.715539  | 4.678823  | -1.289535 |
| C  | 3.873019  | 4.740728  | -2.667883 |
| H  | 3.868863  | 3.683494  | -4.511141 |
| H  | 3.828226  | 5.592608  | -0.721411 |
| H  | 4.103195  | 5.686321  | -3.141813 |
| C  | 4.698281  | -2.310530 | -0.131755 |
| C  | 5.751894  | -2.364106 | 0.821700  |
| C  | 4.586715  | -3.314048 | -1.134357 |
| C  | 6.677806  | -3.421098 | 0.748668  |
| C  | 5.525077  | -4.361694 | -1.151735 |
| C  | 6.559431  | -4.409475 | -0.223023 |
| H  | 7.497857  | -3.487493 | 1.451418  |
| H  | 5.462796  | -5.147213 | -1.893317 |
| H  | 7.277071  | -5.219159 | -0.257661 |

|   |           |           |           |
|---|-----------|-----------|-----------|
| C | 3.482514  | -3.286092 | -2.193288 |
| H | 2.850719  | -2.381365 | -2.090918 |
| C | 2.538645  | -4.483622 | -2.037222 |
| H | 2.100541  | -4.488924 | -1.015999 |
| H | 1.706334  | -4.410042 | -2.769157 |
| H | 3.072519  | -5.442349 | -2.206125 |
| C | 4.068999  | -3.222028 | -3.608866 |
| H | 4.775755  | -2.368585 | -3.687278 |
| H | 4.605321  | -4.158858 | -3.867889 |
| H | 3.256146  | -3.067364 | -4.350329 |
| C | 5.910710  | -1.309714 | 1.917505  |
| H | 5.092673  | -0.561584 | 1.876626  |
| C | 7.215590  | -0.525354 | 1.738800  |
| H | 7.271823  | 0.294785  | 2.486273  |
| H | 8.101412  | -1.182237 | 1.868851  |
| H | 7.248603  | -0.072056 | 0.724808  |
| C | 5.832939  | -1.940919 | 3.313003  |
| H | 5.862305  | -1.147180 | 4.089404  |
| H | 4.879772  | -2.501195 | 3.422713  |
| H | 6.681131  | -2.633821 | 3.493488  |
| C | 3.349790  | 3.444668  | 0.883568  |
| H | 3.220571  | 2.415946  | 1.271977  |
| C | 3.191874  | 1.150785  | -3.767653 |
| H | 2.842210  | 0.272170  | -3.189548 |
| C | 2.100496  | 1.424180  | -4.813736 |
| H | 1.165472  | 1.756088  | -4.314900 |
| H | 2.414895  | 2.202751  | -5.539366 |
| H | 1.879700  | 0.495405  | -5.382175 |
| C | 4.502264  | 0.736952  | -4.447340 |
| H | 4.876376  | 1.538647  | -5.118587 |
| H | 5.277659  | 0.519852  | -3.682738 |
| H | 4.343969  | -0.182386 | -5.050589 |
| C | 2.137472  | 4.251154  | 1.366293  |
| H | 2.205239  | 5.312087  | 1.046683  |
| H | 1.203493  | 3.811440  | 0.957832  |
| H | 2.072061  | 4.223659  | 2.473552  |
| C | 4.645340  | 3.954860  | 1.528432  |
| H | 5.514401  | 3.383324  | 1.137540  |
| H | 4.802593  | 5.035150  | 1.327757  |
| H | 4.603219  | 3.808588  | 2.629232  |
| H | 0.828557  | 1.677657  | 2.975644  |
| H | 2.542829  | 2.777744  | 4.370314  |
| C | 1.475199  | 1.073252  | 3.598662  |
| C | 2.448965  | 1.700412  | 4.381607  |
| C | 1.349929  | -0.328739 | 3.608998  |
| C | 3.303206  | 0.938207  | 5.181180  |
| H | 4.056978  | 1.425699  | 5.785705  |
| C | 2.215935  | -1.085828 | 4.417233  |
| C | 3.183701  | -0.452924 | 5.202168  |
| H | 2.143462  | -2.166041 | 4.441527  |
| H | 3.845020  | -1.042522 | 5.823745  |
| C | -0.429779 | -1.761163 | -2.008279 |
| H | 0.426184  | -1.824641 | -1.320337 |
| C | 0.021505  | -1.476905 | -3.420252 |
| H | 0.462387  | -0.477036 | -3.544475 |
| H | 0.788483  | -2.192768 | -3.766956 |
| H | -0.805319 | -1.556776 | -4.139473 |
| B | -1.325101 | -2.982246 | -1.802947 |
| O | -1.544661 | -3.590643 | -0.569602 |
| O | -1.993323 | -3.643413 | -2.817884 |
| C | -2.832907 | -4.651559 | -2.213575 |
| C | -2.133909 | -4.883068 | -0.834003 |
| C | -4.220669 | -4.052396 | -2.070104 |
| H | -4.195587 | -3.154673 | -1.435425 |
| H | -4.589380 | -3.745332 | -3.057514 |
| H | -4.939881 | -4.764702 | -1.642431 |
| C | -2.872330 | -5.869110 | -3.111122 |
| H | -1.866630 | -6.227524 | -3.361294 |
| H | -3.423850 | -6.691396 | -2.632516 |
| H | -3.384364 | -5.628828 | -4.052718 |
| C | -0.992100 | -5.884647 | -0.918438 |
| H | -1.356745 | -6.913242 | -1.045901 |
| H | -0.320187 | -5.653178 | -1.756175 |
| H | -0.401886 | -5.845694 | 0.007008  |
| C | -3.075823 | -5.250686 | 0.291566  |
| H | -2.509298 | -5.446336 | 1.211130  |
| H | -3.800639 | -4.454234 | 0.503394  |
| H | -3.635414 | -6.165910 | 0.049330  |

170

Figure\_S7\_imid-3\_modeA ts(AS)\_03 / electronic energy: -4442.746138338317 a.u. / lowest freq: -178.29 cm-1

|   |           |           |          |
|---|-----------|-----------|----------|
| C | -1.591619 | -0.687139 | 2.779796 |
| H | -1.979932 | 0.290835  | 3.095238 |
| C | -0.069129 | -0.700368 | 2.584543 |
| H | 0.343270  | -1.716957 | 2.719343 |
| C | -1.085468 | -0.593668 | 0.483151 |
| C | -3.392300 | -1.091578 | 0.924461 |
| C | -3.608396 | -2.140189 | 0.018440 |
| C | -4.483086 | -0.292353 | 1.311892 |

|    |           |           |           |
|----|-----------|-----------|-----------|
| C  | -4.884822 | -2.441730 | -0.443214 |
| H  | -2.754746 | -2.738329 | -0.311560 |
| C  | -5.762657 | -0.608658 | 0.844256  |
| C  | -5.973307 | -1.686039 | -0.011211 |
| H  | -5.019190 | -3.267575 | -1.146023 |
| H  | -6.592978 | 0.029083  | 1.153213  |
| H  | -6.983153 | -1.917017 | -0.357272 |
| S  | -4.333874 | 1.168995  | 2.351894  |
| O  | -5.533509 | 1.997116  | 2.045344  |
| O  | -3.095680 | 1.868351  | 1.878656  |
| O  | -4.260784 | 0.680326  | 3.739248  |
| Cu | -1.482965 | -0.361814 | -1.467473 |
| C  | -2.042853 | -1.719323 | 3.786704  |
| C  | -1.861564 | -1.439443 | 5.153654  |
| C  | -2.605994 | -2.957516 | 3.419875  |
| C  | -2.241181 | -2.366790 | 6.127684  |
| H  | -1.424976 | -0.498583 | 5.465794  |
| C  | -2.983948 | -3.882209 | 4.397707  |
| H  | -2.751583 | -3.227080 | 2.388411  |
| C  | -2.803069 | -3.587307 | 5.750044  |
| H  | -2.097946 | -2.138966 | 7.176010  |
| H  | -3.414949 | -4.831105 | 4.105348  |
| H  | -3.095726 | -4.305586 | 6.504908  |
| N  | -2.052564 | -0.903329 | 1.373870  |
| N  | 0.034461  | -0.337326 | 1.164993  |
| C  | -2.411325 | 0.826285  | -2.866479 |
| C  | -3.449496 | 0.223678  | -3.698865 |
| C  | -3.314059 | 0.205374  | -5.098134 |
| C  | -4.609308 | -0.342764 | -3.139873 |
| C  | -4.291653 | -0.369734 | -5.905378 |
| C  | -5.582265 | -0.923396 | -3.944180 |
| C  | -5.427260 | -0.943214 | -5.332894 |
| H  | -4.166287 | -0.370516 | -6.990674 |
| H  | -6.468929 | -1.366585 | -3.482778 |
| H  | -6.191403 | -1.400404 | -5.965613 |
| C  | -2.648735 | 1.352095  | -1.564660 |
| C  | -1.672438 | 2.104048  | -0.898617 |
| H  | -1.754553 | 2.246678  | 0.178692  |
| H  | -0.671311 | 2.161916  | -1.326825 |
| H  | -4.741579 | -0.338714 | -2.055943 |
| H  | -3.620665 | 1.222710  | -1.074195 |
| P  | -1.520220 | 5.005325  | -0.310909 |
| O  | -1.335649 | 6.465235  | -1.009554 |
| O  | -2.312971 | 5.209872  | 0.949500  |
| O  | 0.011911  | 4.527023  | -0.006352 |
| O  | -2.011431 | 4.010759  | -1.374635 |
| Na | -4.145667 | 3.957400  | 1.336441  |
| H  | -1.553183 | 1.239199  | -3.412908 |
| H  | -2.428559 | 0.657438  | -5.553269 |
| C  | -0.578093 | 6.570756  | -2.202834 |
| H  | -0.635886 | 7.611343  | -2.541897 |
| H  | 0.479272  | 6.312503  | -2.033483 |
| H  | -0.977305 | 5.915577  | -2.990747 |
| C  | 0.756265  | 5.211272  | 0.982103  |
| H  | 1.802720  | 4.905965  | 0.878866  |
| H  | 0.701766  | 6.303326  | 0.850449  |
| H  | 0.406939  | 4.964732  | 1.995305  |
| C  | 1.272994  | -0.159956 | 0.514248  |
| C  | 2.139201  | -1.242558 | 0.336245  |
| C  | 1.680773  | 1.123002  | 0.133145  |
| C  | 3.384480  | -1.060297 | -0.275560 |
| C  | 2.936327  | 1.316058  | -0.455303 |
| C  | 3.783217  | 0.222111  | -0.670145 |
| H  | 4.759863  | 0.372815  | -1.114976 |
| H  | 1.041761  | 1.972773  | 0.333032  |
| H  | 1.859356  | -2.219550 | 0.698601  |
| C  | 3.400043  | 2.676261  | -0.782714 |
| C  | 3.077977  | 3.254603  | -2.042124 |
| C  | 4.232970  | 3.376023  | 0.135700  |
| C  | 3.603900  | 4.520012  | -2.360227 |
| C  | 4.733871  | 4.638246  | -0.231273 |
| C  | 4.416325  | 5.203107  | -1.461749 |
| H  | 3.399199  | 4.979841  | -3.317735 |
| H  | 5.386531  | 5.189128  | 0.432668  |
| H  | 4.815200  | 6.173707  | -1.727393 |
| C  | 4.293000  | -2.210552 | -0.453130 |
| C  | 4.965493  | -2.761910 | 0.674753  |
| C  | 4.495639  | -2.768521 | -1.748471 |
| C  | 5.803649  | -3.875871 | 0.486664  |
| C  | 5.372924  | -3.859506 | -1.886589 |
| C  | 6.007086  | -4.412052 | -0.779727 |
| H  | 6.318474  | -4.328170 | 1.323991  |
| H  | 5.565982  | -4.294743 | -2.858056 |
| H  | 6.667968  | -5.260102 | -0.905544 |
| C  | 3.800835  | -2.216349 | -2.994771 |
| H  | 3.058694  | -1.438348 | -2.725133 |
| C  | 3.010673  | -3.303677 | -3.735950 |
| H  | 2.338667  | -3.833969 | -3.032586 |



|   |           |           |           |
|---|-----------|-----------|-----------|
| H | 2.386370  | -2.842272 | -4.530577 |
| H | 3.685254  | -4.045470 | -4.211980 |
| C | 4.815266  | -1.548938 | -3.929750 |
| H | 5.364316  | -0.750209 | -3.387162 |
| H | 5.548785  | -2.287608 | -4.316887 |
| H | 4.290547  | -1.084849 | -4.792169 |
| C | 4.823709  | -2.171764 | 2.079767  |
| H | 4.184283  | -1.266651 | 2.076038  |
| C | 6.178459  | -1.708695 | 2.630520  |
| H | 6.034114  | -1.180386 | 3.597352  |
| H | 6.862676  | -2.566298 | 2.799896  |
| H | 6.654843  | -1.000871 | 1.918518  |
| C | 4.150939  | -3.169929 | 3.029231  |
| H | 3.989499  | -2.700430 | 4.022960  |
| H | 3.161278  | -3.471368 | 2.623552  |
| H | 4.775010  | -4.077917 | 3.166625  |
| C | 4.631122  | 2.781096  | 1.488952  |
| H | 4.091334  | 1.831802  | 1.683799  |
| C | 2.228811  | 2.519258  | -3.079923 |
| H | 1.786876  | 1.596615  | -2.650997 |
| C | 1.043309  | 3.370632  | -3.553828 |
| H | 0.479766  | 3.755387  | -2.680818 |
| H | 1.378064  | 4.231688  | -4.168923 |
| H | 0.355189  | 2.753130  | -4.169248 |
| C | 3.092201  | 2.076037  | -4.265217 |
| H | 3.504933  | 2.952552  | -4.808515 |
| H | 3.934928  | 1.448716  | -3.904497 |
| H | 2.486810  | 1.470076  | -4.972904 |
| C | 4.261511  | 3.709952  | 2.652746  |
| H | 4.843224  | 4.654451  | 2.623265  |
| H | 3.179322  | 3.950774  | 2.618524  |
| H | 4.471462  | 3.205347  | 3.619838  |
| C | 6.125228  | 2.440988  | 1.512492  |
| H | 6.369399  | 1.748815  | 0.678281  |
| H | 6.745510  | 3.356961  | 1.413607  |
| H | 6.386515  | 1.935887  | 2.467083  |
| H | -0.319329 | 2.041461  | 2.686760  |
| H | 0.919424  | 3.613341  | 4.125631  |
| C | 0.415188  | 1.656684  | 3.382889  |
| C | 1.120060  | 2.552170  | 4.191395  |
| C | 0.668012  | 0.274271  | 3.465434  |
| C | 2.090669  | 2.080696  | 5.078232  |
| H | 2.639709  | 2.776753  | 5.698974  |
| C | 1.651007  | -0.188556 | 4.357472  |
| C | 2.358931  | 0.712279  | 5.157888  |
| H | 1.871752  | -1.245719 | 4.433479  |
| H | 3.115895  | 0.348798  | 5.840698  |
| C | -0.459192 | -1.652415 | -2.653531 |
| H | 0.516597  | -1.140419 | -2.547650 |
| C | -0.870256 | -1.754946 | -4.104134 |
| H | -0.832603 | -0.793501 | -4.639727 |
| H | -0.219817 | -2.446205 | -4.673215 |
| H | -1.895299 | -2.142810 | -4.221830 |
| B | -0.449841 | -2.982582 | -1.890803 |
| O | 0.585860  | -3.424095 | -1.091257 |
| O | -1.456580 | -3.933130 | -1.973902 |
| C | -0.944257 | -5.168862 | -1.430089 |
| C | 0.204887  | -4.672714 | -0.482418 |
| C | -2.073549 | -5.899029 | -0.734774 |
| H | -2.563231 | -5.274287 | 0.023393  |
| H | -2.836715 | -6.194940 | -1.467385 |
| H | -1.710414 | -6.813372 | -0.243528 |
| C | -0.424060 | -5.986054 | -2.602455 |
| H | 0.388563  | -5.464779 | -3.127346 |
| H | -0.051838 | -6.969843 | -2.284931 |
| H | -1.235816 | -6.147800 | -3.324418 |
| C | 1.420481  | -5.573748 | -0.422216 |
| H | 1.162345  | -6.558267 | -0.005832 |
| H | 1.873320  | -5.725165 | -1.408976 |
| H | 2.184840  | -5.125251 | 0.227261  |
| C | -0.291484 | -4.362166 | 0.918835  |
| H | 0.521953  | -3.946056 | 1.527222  |
| H | -1.096967 | -3.617161 | 0.874594  |
| H | -0.666957 | -5.253716 | 1.438859  |

170

Figure\_S7\_imid-3\_modeA\_ts(AS)\_04 / electronic energy: -4442.744366801986 a.u. / lowest freq: -264.99 cm-1

|   |           |           |           |
|---|-----------|-----------|-----------|
| C | 0.970692  | -2.147369 | -2.151946 |
| H | 1.598097  | -1.586722 | -2.857443 |
| C | -0.487562 | -1.656565 | -2.111334 |
| H | -1.186999 | -2.479889 | -1.880706 |
| C | 0.606702  | -0.899617 | -0.180130 |
| C | 2.680507  | -2.106817 | -0.160671 |
| C | 2.611992  | -2.527535 | 1.177172  |
| C | 3.943350  | -2.019513 | -0.778866 |
| C | 3.755875  | -2.871729 | 1.888040  |
| H | 1.631326  | -2.601110 | 1.658127  |
| C | 5.084879  | -2.369394 | -0.050373 |
| C | 5.002549  | -2.796843 | 1.271548  |

|    |           |           |           |
|----|-----------|-----------|-----------|
| H  | 3.662268  | -3.210214 | 2.922907  |
| H  | 6.052506  | -2.281181 | -0.547181 |
| H  | 5.909606  | -3.070163 | 1.814348  |
| S  | 4.208681  | -1.445634 | -2.464931 |
| O  | 5.665970  | -1.144558 | -2.557376 |
| O  | 3.408313  | -0.184349 | -2.582921 |
| O  | 3.766647  | -2.533631 | -3.353122 |
| Cu | 0.985879  | 0.027449  | 1.566000  |
| C  | 1.055498  | -3.612593 | -2.521351 |
| C  | 0.799571  | -3.973877 | -3.857507 |
| C  | 1.358130  | -4.631174 | -1.594800 |
| C  | 0.846871  | -5.311916 | -4.257291 |
| H  | 0.564938  | -3.214958 | -4.593694 |
| C  | 1.403241  | -5.968367 | -1.999603 |
| H  | 1.551599  | -4.416551 | -0.558329 |
| C  | 1.148496  | -6.308874 | -3.328803 |
| H  | 0.648606  | -5.575456 | -5.288140 |
| H  | 1.633545  | -6.742719 | -1.279192 |
| H  | 1.183601  | -7.345238 | -3.638814 |
| N  | 1.438440  | -1.787329 | -0.776334 |
| N  | -0.457230 | -0.738528 | -0.966958 |
| C  | 2.181439  | 1.322618  | 2.596901  |
| C  | 2.623769  | 0.978172  | 3.946751  |
| C  | 2.335153  | 1.844458  | 5.015996  |
| C  | 3.339473  | -0.199105 | 4.225171  |
| C  | 2.734841  | 1.540450  | 6.314174  |
| C  | 3.736096  | -0.505665 | 5.521705  |
| C  | 3.432847  | 0.361543  | 6.574925  |
| H  | 2.499328  | 2.229344  | 7.128910  |
| H  | 4.283342  | -1.431708 | 5.715314  |
| H  | 3.741942  | 0.118197  | 7.594041  |
| C  | 2.849657  | 0.928666  | 1.403549  |
| C  | 2.593264  | 1.566917  | 0.174063  |
| H  | 2.923890  | 1.091103  | -0.755660 |
| H  | 1.705442  | 2.194210  | 0.089221  |
| H  | 3.565887  | -0.891748 | 3.411264  |
| H  | 3.667630  | 0.199890  | 1.450348  |
| P  | 4.841650  | 3.133618  | -0.892427 |
| O  | 5.727003  | 1.760224  | -0.671393 |
| O  | 4.613361  | 3.161612  | -2.375761 |
| O  | 5.803384  | 4.324490  | -0.351817 |
| O  | 3.685945  | 3.147162  | 0.118344  |
| Na | 5.424651  | 1.151405  | -3.106493 |
| H  | 1.595194  | 2.246973  | 2.531683  |
| H  | 1.790822  | 2.771705  | 4.818220  |
| C  | 6.243055  | 1.445919  | 0.612227  |
| H  | 6.368797  | 0.357326  | 0.672652  |
| H  | 7.219166  | 1.928103  | 0.772800  |
| H  | 5.556152  | 1.769307  | 1.409237  |
| C  | 6.901438  | 4.731009  | -1.153007 |
| H  | 7.412190  | 5.542116  | -0.622628 |
| H  | 7.617535  | 3.907944  | -1.307096 |
| H  | 6.569158  | 5.097354  | -2.134794 |
| C  | -1.547304 | 0.083672  | -0.603769 |
| C  | -2.798711 | -0.481409 | -0.324418 |
| C  | -1.405236 | 1.478700  | -0.619859 |
| C  | -3.892782 | 0.339485  | -0.022787 |
| C  | -2.507868 | 2.302239  | -0.356658 |
| C  | -3.746731 | 1.730619  | -0.047814 |
| H  | -4.601832 | 2.367287  | 0.148458  |
| H  | -0.455313 | 1.920216  | -0.890748 |
| H  | -2.925159 | -1.555807 | -0.347291 |
| C  | -2.401891 | 3.768090  | -0.492613 |
| C  | -2.066934 | 4.568118  | 0.635192  |
| C  | -2.749248 | 4.385596  | -1.727635 |
| C  | -2.114430 | 5.969051  | 0.511923  |
| C  | -2.782526 | 5.790393  | -1.798363 |
| C  | -2.467545 | 6.569477  | -0.691067 |
| H  | -1.890051 | 6.607294  | 1.356146  |
| H  | -3.067267 | 6.292392  | -2.713394 |
| H  | -2.504235 | 7.648914  | -0.763948 |
| C  | -5.209739 | -0.256290 | 0.278121  |
| C  | -6.009614 | -0.779888 | -0.777501 |
| C  | -5.693246 | -0.278621 | 1.618369  |
| C  | -7.262750 | -1.338558 | -0.465861 |
| C  | -6.961790 | -0.831212 | 1.872486  |
| C  | -7.730137 | -1.362112 | 0.843022  |
| H  | -7.894382 | -1.748476 | -1.242875 |
| H  | -7.365120 | -0.852386 | 2.876224  |
| H  | -8.701694 | -1.787165 | 1.060350  |
| C  | -4.889989 | 0.293216  | 2.788178  |
| H  | -3.886234 | 0.627325  | 2.458560  |
| C  | -4.642247 | -0.762457 | 3.873232  |
| H  | -4.186118 | -1.666408 | 3.423797  |
| H  | -3.941530 | -0.364622 | 4.637624  |
| H  | -5.584543 | -1.052653 | 4.382933  |
| C  | -5.586314 | 1.525741  | 3.375704  |
| H  | -5.756550 | 2.281155  | 2.579246  |

|   |           |           |           |
|---|-----------|-----------|-----------|
| H | -6.564171 | 1.256795  | 3.828194  |
| H | -4.948100 | 1.985270  | 4.160574  |
| C | -5.568310 | -0.727093 | -2.241672 |
| H | -4.577937 | -0.241315 | -2.348812 |
| C | -6.534032 | 0.118001  | -3.081494 |
| H | -6.135988 | 0.237464  | -4.112062 |
| H | -7.536161 | -0.355620 | -3.145070 |
| H | -6.640514 | 1.129112  | -2.633319 |
| C | -5.419129 | -2.137645 | -2.823830 |
| H | -5.043322 | -2.080833 | -3.867359 |
| H | -4.689150 | -2.719712 | -2.221265 |
| H | -6.389601 | -2.676499 | -2.833332 |
| C | -3.121734 | 3.571063  | -2.967937 |
| H | -2.965674 | 2.486222  | -2.796947 |
| C | -1.692610 | 3.955436  | 1.983433  |
| H | -1.614760 | 2.852646  | 1.909413  |
| C | -0.318634 | 4.444104  | 2.459322  |
| H | 0.444837  | 4.250179  | 1.676154  |
| H | -0.328209 | 5.529654  | 2.689568  |
| H | -0.023942 | 3.902510  | 3.382263  |
| C | -2.771583 | 4.245387  | 3.031723  |
| H | -2.835634 | 5.332279  | 3.250860  |
| H | -3.759033 | 3.895748  | 2.663401  |
| H | -2.541112 | 3.704857  | 3.974807  |
| C | -2.235147 | 3.932875  | -4.166633 |
| H | -2.406046 | 4.976963  | -4.501444 |
| H | -1.164454 | 3.810673  | -3.896512 |
| H | -2.459869 | 3.259083  | -5.020286 |
| C | -4.605748 | 3.745589  | -3.308103 |
| H | -5.230076 | 3.464094  | -2.433101 |
| H | -4.831552 | 4.796280  | -3.588249 |
| H | -4.882540 | 3.083914  | -4.156767 |
| H | 0.547801  | 0.630179  | -3.238944 |
| H | -0.193562 | 1.764075  | -5.298112 |
| C | -0.275794 | 0.215118  | -3.806411 |
| C | -0.697513 | 0.864707  | -4.969133 |
| C | -0.920270 | -0.959257 | -3.375167 |
| C | -1.774846 | 0.360896  | -5.701877 |
| H | -2.105533 | 0.870767  | -6.597379 |
| C | -1.998929 | -1.461102 | -4.123252 |
| C | -2.425977 | -0.799961 | -5.278234 |
| H | -2.509695 | -2.363696 | -3.813353 |
| H | -3.260972 | -1.189304 | -5.846160 |
| C | -0.626633 | -0.120420 | 2.801031  |
| H | -1.375627 | 0.434412  | 2.209173  |
| C | -0.529930 | 0.448955  | 4.197672  |
| H | -0.250670 | 1.514040  | 4.225246  |
| H | -1.494233 | 0.378437  | 4.735040  |
| H | 0.203361  | -0.089441 | 4.818451  |
| B | -0.897574 | -1.627131 | 2.721555  |
| O | -1.948340 | -2.204053 | 2.034676  |
| O | -0.122209 | -2.590033 | 3.355636  |
| C | -0.843758 | -3.840741 | 3.299466  |
| C | -1.777039 | -3.635069 | 2.056858  |
| C | 0.146315  | -4.977357 | 3.161549  |
| H | 0.814805  | -4.841088 | 2.301692  |
| H | 0.769894  | -5.048917 | 4.063190  |
| H | -0.374171 | -5.938439 | 3.039587  |
| C | -1.621595 | -3.962729 | 4.600315  |
| H | -2.346230 | -3.143714 | 4.712261  |
| H | -2.166390 | -4.914678 | 4.665989  |
| H | -0.925857 | -3.911778 | 5.448504  |
| C | -3.130390 | -4.304015 | 2.158554  |
| H | -3.021398 | -5.397510 | 2.195640  |
| H | -3.690738 | -3.988680 | 3.045811  |
| H | -3.736667 | -4.058133 | 1.276176  |
| C | -1.102907 | -4.010913 | 0.750429  |
| H | -1.745642 | -3.720342 | -0.091460 |
| H | -0.152007 | -3.469353 | 0.653441  |
| H | -0.907112 | -5.088303 | 0.665660  |

170

Figure\_S7\_imid-3\_modeA\_ts(AS)\_05 / electronic energy: -4442.741822923053 a.u. / lowest freq: -255.58 cm<sup>-1</sup>

|   |           |           |           |
|---|-----------|-----------|-----------|
| C | -1.016370 | -2.898409 | -2.135843 |
| H | -1.250482 | -3.741222 | -1.468131 |
| C | 0.438192  | -2.413096 | -2.007436 |
| H | 0.848525  | -2.066166 | -2.971897 |
| C | -0.985559 | -0.819338 | -1.018996 |
| C | -3.189471 | -1.625118 | -1.680175 |
| C | -3.766502 | -0.680985 | -2.537094 |
| C | -4.024500 | -2.474730 | -0.932921 |
| C | -5.147331 | -0.604618 | -2.691922 |
| H | -3.104926 | -0.020108 | -3.101041 |
| C | -5.410160 | -2.393325 | -1.097270 |
| C | -5.970923 | -1.477568 | -1.983916 |
| H | -5.575893 | 0.133717  | -3.372828 |
| H | -6.040811 | -3.057445 | -0.503502 |
| H | -7.055403 | -1.435664 | -2.106173 |
| S | -3.402736 | -3.708483 | 0.220659  |

|    |           |           |           |
|----|-----------|-----------|-----------|
| O  | -4.526636 | -3.948954 | 1.173386  |
| O  | -2.247015 | -3.083061 | 0.929069  |
| O  | -3.050711 | -4.881917 | -0.600796 |
| Cu | -1.861070 | 0.776301  | -0.217969 |
| C  | -1.401033 | -3.251944 | -3.550567 |
| C  | -1.798565 | -4.562351 | -3.869343 |
| C  | -1.378416 | -2.279062 | -4.567902 |
| C  | -2.168946 | -4.890441 | -5.176977 |
| H  | -1.819662 | -5.332483 | -3.109112 |
| C  | -1.750570 | -2.611552 | -5.873244 |
| H  | -1.076040 | -1.263380 | -4.349282 |
| C  | -2.146033 | -3.916047 | -6.177681 |
| H  | -2.473791 | -5.901410 | -5.414574 |
| H  | -1.732598 | -1.857083 | -6.649025 |
| H  | -2.433690 | -4.172180 | -7.189134 |
| N  | -1.767603 | -1.713519 | -1.646938 |
| N  | 0.278644  | -1.248550 | -1.115393 |
| C  | -3.045679 | 1.529745  | 1.275695  |
| C  | -4.367085 | 2.001780  | 0.859508  |
| C  | -4.737656 | 3.341343  | 1.074444  |
| C  | -5.302375 | 1.149490  | 0.244709  |
| C  | -5.989759 | 3.810547  | 0.688233  |
| C  | -6.553263 | 1.618561  | -0.141772 |
| C  | -6.905365 | 2.952761  | 0.076209  |
| H  | -6.254428 | 4.856226  | 0.868264  |
| H  | -7.259811 | 0.936442  | -0.622359 |
| H  | -7.887244 | 3.320498  | -0.230982 |
| C  | -2.747307 | 0.165124  | 1.541398  |
| C  | -1.511036 | -0.236046 | 2.079911  |
| H  | -1.215101 | -1.278649 | 1.960333  |
| H  | -0.698584 | 0.490492  | 2.132819  |
| H  | -5.038263 | 0.105611  | 0.052043  |
| H  | -3.497302 | -0.615561 | 1.366329  |
| P  | -1.050460 | -1.489391 | 4.683495  |
| O  | -0.908351 | -1.167994 | 6.271492  |
| O  | -1.684200 | -2.845366 | 4.556072  |
| O  | 0.492821  | -1.500212 | 4.149424  |
| O  | -1.678599 | -0.260833 | 4.004487  |
| Na | -3.202098 | -3.648313 | 3.152202  |
| H  | -2.393534 | 2.290234  | 1.720969  |
| H  | -4.021469 | 4.011302  | 1.552340  |
| C  | -0.286275 | 0.040149  | 6.676874  |
| H  | -0.248091 | 0.041307  | 7.771860  |
| H  | 0.740670  | 0.114720  | 6.286203  |
| H  | -0.854772 | 0.918126  | 6.337302  |
| C  | 1.308287  | -2.598896 | 4.513858  |
| H  | 2.353717  | -2.285562 | 4.428981  |
| H  | 1.130334  | -2.914545 | 5.553360  |
| H  | 1.137490  | -3.461112 | 3.852660  |
| C  | 1.377911  | -0.455859 | -0.721432 |
| C  | 2.173586  | 0.177396  | -1.683278 |
| C  | 1.777550  | -0.427545 | 0.621475  |
| C  | 3.345080  | 0.834126  | -1.288805 |
| C  | 2.955184  | 0.241142  | 0.993496  |
| C  | 3.709845  | 0.860776  | 0.065522  |
| H  | 4.631413  | 1.351833  | 0.358768  |
| H  | 1.207973  | -0.970298 | 1.364448  |
| H  | 1.904562  | 0.129912  | -2.731494 |
| C  | 3.409070  | 0.201142  | 2.396690  |
| C  | 2.960078  | 1.250389  | 3.359306  |
| C  | 4.330303  | -0.782243 | 2.839687  |
| C  | 3.465936  | 1.193561  | 4.665468  |
| C  | 4.768149  | -0.748408 | 4.180675  |
| C  | 4.351556  | 0.186794  | 5.045647  |
| H  | 3.187156  | 1.939219  | 5.398181  |
| H  | 5.469062  | -1.490943 | 4.539196  |
| H  | 4.722036  | 0.170320  | 6.063020  |
| C  | 4.248027  | 1.408156  | -2.303643 |
| C  | 5.243595  | 0.589136  | -2.907912 |
| C  | 4.140093  | 2.780423  | -2.659706 |
| C  | 6.116547  | 1.165404  | -3.848785 |
| C  | 5.050911  | 3.313708  | -3.590431 |
| C  | 6.024082  | 2.513050  | -4.177797 |
| H  | 6.881798  | 0.570848  | -4.330122 |
| H  | 5.006284  | 4.357252  | -3.872836 |
| H  | 6.710469  | 2.940071  | -4.897756 |
| C  | 3.060362  | 3.689269  | -2.074681 |
| H  | 2.382058  | 3.125639  | -1.401476 |
| C  | 2.171659  | 4.267588  | -3.182972 |
| H  | 1.764653  | 3.447540  | -3.812241 |
| H  | 1.318400  | 4.814071  | -2.736692 |
| H  | 2.734347  | 4.972710  | -3.829761 |
| C  | 3.681584  | 4.803481  | -1.224513 |
| H  | 4.306660  | 4.360510  | -0.419757 |
| H  | 4.313058  | 5.476607  | -1.841770 |
| H  | 2.883572  | 5.410605  | -0.747551 |
| C  | 5.394957  | -0.895107 | -2.569184 |
| H  | 4.665309  | -1.209011 | -1.795508 |

|   |           |           |           |
|---|-----------|-----------|-----------|
| C | 6.781309  | -1.193018 | -1.985666 |
| H | 6.824970  | -2.244880 | -1.630725 |
| H | 7.579706  | -1.046559 | -2.743007 |
| H | 6.980020  | -0.524665 | -1.121324 |
| C | 5.114465  | -1.770477 | -3.795997 |
| H | 5.155761  | -2.844340 | -3.514331 |
| H | 4.098675  | -1.553537 | -4.190687 |
| H | 5.859149  | -1.590178 | -4.599532 |
| C | 4.881354  | -1.857763 | 1.903640  |
| H | 4.441521  | -1.769168 | 0.889079  |
| C | 2.048628  | 2.394583  | 2.939992  |
| H | 1.646595  | 2.213196  | 1.921648  |
| C | 0.834845  | 2.519226  | 3.870848  |
| H | 0.362051  | 1.527337  | 4.014926  |
| H | 1.124509  | 2.920524  | 4.864633  |
| H | 0.080406  | 3.200611  | 3.425578  |
| C | 2.838193  | 3.706657  | 2.881536  |
| H | 3.238420  | 3.976062  | 3.882132  |
| H | 3.686381  | 3.606011  | 2.170678  |
| H | 2.189134  | 4.532948  | 2.527492  |
| C | 4.524589  | -3.264626 | 2.396178  |
| H | 4.985625  | -3.481029 | 3.382296  |
| H | 3.423259  | -3.364295 | 2.483018  |
| H | 4.884461  | -4.023431 | 1.669482  |
| C | 6.397016  | -1.706140 | 1.730375  |
| H | 6.637493  | -0.678357 | 1.384083  |
| H | 6.933143  | -1.897878 | 2.683601  |
| H | 6.766916  | -2.426117 | 0.969781  |
| H | 0.346398  | -3.558000 | 0.494218  |
| H | 1.874840  | -5.242580 | 1.439555  |
| C | 1.166444  | -3.925061 | -0.107979 |
| C | 2.034761  | -4.876095 | 0.433792  |
| C | 1.363253  | -3.445314 | -1.416304 |
| C | 3.116273  | -5.344552 | -0.315781 |
| H | 3.792411  | -6.075275 | 0.108651  |
| C | 2.456119  | -3.922428 | -2.160917 |
| C | 3.329433  | -4.864561 | -1.610018 |
| H | 2.633307  | -3.566923 | -3.167924 |
| H | 4.170637  | -5.224386 | -2.188181 |
| C | -1.878370 | 2.255894  | -1.576789 |
| H | -2.964421 | 2.199843  | -1.805749 |
| C | -1.062572 | 1.947448  | -2.821609 |
| H | -1.261019 | 0.948810  | -3.244535 |
| H | -1.228289 | 2.674790  | -3.637236 |
| H | 0.019214  | 1.975862  | -2.614567 |
| B | -1.639499 | 3.693081  | -1.047211 |
| O | -1.893023 | 4.166950  | 0.227084  |
| O | -1.178843 | 4.710027  | -1.867968 |
| C | -1.455166 | 5.962104  | -1.204981 |
| C | -1.444463 | 5.539956  | 0.296340  |
| C | -0.406829 | 6.984593  | -1.583464 |
| H | 0.608299  | 6.647940  | -1.343582 |
| H | -0.447845 | 7.187841  | -2.662038 |
| H | -0.582614 | 7.934367  | -1.057640 |
| C | -2.832186 | 6.413857  | -1.670214 |
| H | -3.609283 | 5.692547  | -1.376305 |
| H | -3.102370 | 7.396159  | -1.258606 |
| H | -2.841238 | 6.491256  | -2.765583 |
| C | -2.383311 | 6.329868  | 1.182776  |
| H | -2.102047 | 7.392957  | 1.198716  |
| H | -3.426680 | 6.258672  | 0.851035  |
| H | -2.333018 | 5.959039  | 2.216242  |
| C | -0.046753 | 5.521720  | 0.889254  |
| H | -0.086206 | 5.065983  | 1.886181  |
| H | 0.640750  | 4.928954  | 0.270187  |
| H | 0.368382  | 6.532829  | 0.998851  |

170

Figure\_S7\_imid-3\_modeA\_ts(AS)\_06 / electronic energy: -4442.737863528388 a.u. / lowest freq: -260.51 cm-1

|    |           |           |           |
|----|-----------|-----------|-----------|
| C  | -0.661713 | -2.736399 | -2.391476 |
| H  | -1.139213 | -3.543506 | -1.814370 |
| C  | 0.785790  | -2.453215 | -1.950892 |
| H  | 1.427027  | -2.144531 | -2.794982 |
| C  | -0.600210 | -0.707111 | -1.191379 |
| C  | -2.694524 | -1.171462 | -2.343440 |
| C  | -2.942549 | -0.157338 | -3.275148 |
| C  | -3.778784 | -1.882125 | -1.799163 |
| C  | -4.237478 | 0.122361  | -3.701178 |
| H  | -2.091983 | 0.397016  | -3.677350 |
| C  | -5.075905 | -1.597431 | -2.234667 |
| C  | -5.305598 | -0.614247 | -3.193795 |
| H  | -4.406929 | 0.913180  | -4.434893 |
| H  | -5.903116 | -2.159403 | -1.797362 |
| H  | -6.325124 | -0.412571 | -3.529979 |
| S  | -3.583051 | -3.197015 | -0.589846 |
| O  | -4.911202 | -3.313672 | 0.081166  |
| O  | -2.544492 | -2.741275 | 0.381095  |
| O  | -3.203299 | -4.393719 | -1.366365 |
| Cu | -1.382423 | 0.986755  | -0.517238 |

|    |           |           |           |
|----|-----------|-----------|-----------|
| C  | -0.789968 | -3.027850 | -3.865539 |
| C  | -1.285459 | -4.270152 | -4.299572 |
| C  | -0.427471 | -2.064921 | -4.826183 |
| C  | -1.420539 | -4.539882 | -5.664725 |
| H  | -1.565336 | -5.032552 | -3.584007 |
| C  | -0.565336 | -2.338651 | -6.189685 |
| H  | -0.041066 | -1.102354 | -4.519904 |
| C  | -1.062220 | -3.574800 | -6.608863 |
| H  | -1.803341 | -5.498323 | -5.990755 |
| H  | -0.286843 | -1.591601 | -6.921629 |
| H  | -1.168284 | -3.785441 | -7.665161 |
| N  | -1.337220 | -1.464316 | -2.021692 |
| N  | 0.592007  | -1.297115 | -1.055268 |
| C  | -2.731113 | 1.929910  | 0.683871  |
| C  | -3.836909 | 2.586360  | -0.015185 |
| C  | -4.026851 | 3.974495  | 0.110426  |
| C  | -4.739537 | 1.869359  | -0.821982 |
| C  | -5.067746 | 4.620186  | -0.550833 |
| C  | -5.779447 | 2.515005  | -1.483345 |
| C  | -5.949377 | 3.895469  | -1.354808 |
| H  | -5.192890 | 5.700509  | -0.436450 |
| H  | -6.462201 | 1.934424  | -2.109744 |
| H  | -6.764147 | 4.401941  | -1.877493 |
| C  | -2.709057 | 0.536321  | 0.984448  |
| C  | -1.781009 | -0.022469 | 1.883176  |
| H  | -1.638605 | -1.104182 | 1.863051  |
| H  | -0.915502 | 0.569700  | 2.182525  |
| H  | -4.616462 | 0.789572  | -0.944307 |
| H  | -3.486785 | -0.134837 | 0.599411  |
| P  | -3.371966 | -1.125760 | 4.011411  |
| O  | -4.615309 | -1.199251 | 2.929896  |
| O  | -2.848868 | -2.533533 | 4.017287  |
| O  | -4.068140 | -0.669187 | 5.402088  |
| O  | -2.477691 | 0.076380  | 3.669380  |
| Na | -3.973359 | -3.532406 | 2.272917  |
| H  | -2.111744 | 2.589072  | 1.303834  |
| H  | -3.337432 | 4.541500  | 0.737473  |
| C  | -5.430995 | -0.062730 | 2.691446  |
| H  | -5.883558 | -0.173003 | 1.697536  |
| H  | -6.231584 | 0.011028  | 3.442952  |
| H  | -4.839474 | 0.865145  | 2.710457  |
| C  | -4.849619 | -1.611470 | 6.120158  |
| H  | -5.192386 | -1.121179 | 7.037877  |
| H  | -5.731312 | -1.929080 | 5.541325  |
| H  | -4.261982 | -2.501770 | 6.385868  |
| C  | 1.660039  | -0.687502 | -0.362890 |
| C  | 2.780375  | -0.216792 | -1.057914 |
| C  | 1.670383  | -0.674138 | 1.037873  |
| C  | 3.882672  | 0.269432  | -0.344977 |
| C  | 2.788424  | -0.184182 | 1.731236  |
| C  | 3.858262  | 0.281242  | 1.057769  |
| H  | 4.726667  | 0.636635  | 1.601770  |
| H  | 0.840057  | -1.098337 | 1.585975  |
| H  | 2.806321  | -0.250576 | -2.140197 |
| C  | 2.823244  | -0.243108 | 3.205037  |
| C  | 2.461413  | 0.961165  | 4.009138  |
| C  | 3.311942  | -1.391221 | 3.878748  |
| C  | 2.669939  | 0.905720  | 5.394177  |
| C  | 3.459709  | -1.345116 | 5.281355  |
| C  | 3.159277  | -0.252045 | 5.996646  |
| H  | 2.449952  | 1.760821  | 6.019715  |
| H  | 3.842735  | -2.206388 | 5.813116  |
| H  | 3.301962  | -0.265243 | 7.070028  |
| C  | 5.102044  | 0.684248  | -1.063640 |
| C  | 6.113386  | -0.275323 | -1.352036 |
| C  | 5.271175  | 2.039946  | -1.458717 |
| C  | 7.275357  | 0.144774  | -2.024907 |
| C  | 6.455412  | 2.410767  | -2.122374 |
| C  | 7.442843  | 1.472599  | -2.401054 |
| H  | 8.062851  | -0.558762 | -2.260914 |
| H  | 6.618727  | 3.434505  | -2.432309 |
| H  | 8.345344  | 1.777020  | -2.915491 |
| C  | 4.207039  | 3.103866  | -1.193466 |
| H  | 3.320805  | 2.669245  | -0.686950 |
| C  | 3.694161  | 3.703895  | -2.508299 |
| H  | 3.344008  | 2.895239  | -3.184767 |
| H  | 2.839086  | 4.379502  | -2.308290 |
| H  | 4.485342  | 4.287117  | -3.024302 |
| C  | 4.742326  | 4.195103  | -0.258312 |
| H  | 5.102280  | 3.738478  | 0.688307  |
| H  | 5.577980  | 4.755311  | -0.727812 |
| H  | 3.936002  | 4.916119  | -0.009815 |
| C  | 5.977844  | -1.746949 | -0.957348 |
| H  | 5.024203  | -1.935609 | -0.423619 |
| C  | 7.092431  | -2.165842 | 0.008864  |
| H  | 6.905132  | -3.195941 | 0.380580  |
| H  | 8.085636  | -2.147614 | -0.486963 |
| H  | 7.114967  | -1.479389 | 0.881801  |

|   |           |           |           |
|---|-----------|-----------|-----------|
| C | 5.955225  | -2.649008 | -2.196846 |
| H | 5.771524  | -3.702453 | -1.896925 |
| H | 5.136989  | -2.333517 | -2.879037 |
| H | 6.918740  | -2.605077 | -2.746686 |
| C | 3.716757  | -2.659502 | 3.128597  |
| H | 3.521982  | -2.560497 | 2.040881  |
| C | 1.907129  | 2.223839  | 3.366915  |
| H | 1.686169  | 2.043555  | 2.294125  |
| C | 0.582501  | 2.646977  | 4.018367  |
| H | -0.101356 | 1.776871  | 4.100743  |
| H | 0.746671  | 3.065347  | 5.033660  |
| H | 0.081288  | 3.419215  | 3.400097  |
| C | 2.942191  | 3.352061  | 3.429377  |
| H | 3.174986  | 3.622200  | 4.481339  |
| H | 3.879590  | 3.033313  | 2.925331  |
| H | 2.561483  | 4.254372  | 2.909287  |
| C | 2.897306  | -3.868048 | 3.597116  |
| H | 3.084410  | -4.097890 | 4.666623  |
| H | 1.813583  | -3.668133 | 3.455167  |
| H | 3.169687  | -4.764322 | 3.001068  |
| C | 5.219486  | -2.924698 | 3.273140  |
| H | 5.793776  | -2.030121 | 2.951578  |
| H | 5.487042  | -3.163702 | 4.323998  |
| H | 5.518273  | -3.779688 | 2.629628  |
| H | 0.015078  | -3.638525 | 0.409970  |
| H | 1.084237  | -5.529949 | 1.568765  |
| C | 0.895980  | -4.093492 | -0.022239 |
| C | 1.504182  | -5.161225 | 0.642000  |
| C | 1.428115  | -3.612212 | -1.232898 |
| C | 2.658965  | -5.746124 | 0.117733  |
| H | 3.133650  | -6.567470 | 0.638621  |
| C | 2.589513  | -4.209836 | -1.752919 |
| C | 3.201839  | -5.269854 | -1.077729 |
| H | 3.022605  | -3.856608 | -2.680068 |
| H | 4.096709  | -5.723962 | -1.482978 |
| C | -0.881528 | 2.423973  | -1.832286 |
| H | -1.892814 | 2.514831  | -2.285968 |
| C | 0.124977  | 1.964076  | -2.874408 |
| H | -0.135590 | 1.004542  | -3.349246 |
| H | 0.261359  | 2.694589  | -3.692374 |
| H | 1.125304  | 1.819833  | -2.435520 |
| B | -0.549514 | 3.833391  | -1.277602 |
| O | -0.986278 | 4.397185  | -0.094601 |
| O | 0.213185  | 4.735918  | -2.002346 |
| C | -0.012798 | 6.045575  | -1.441083 |
| C | -0.384958 | 5.705756  | 0.035910  |
| C | 1.231857  | 6.889476  | -1.605434 |
| H | 2.114702  | 6.412985  | -1.164035 |
| H | 1.437805  | 7.056128  | -2.671350 |
| H | 1.103018  | 7.873838  | -1.132327 |
| C | -1.176873 | 6.657718  | -2.207426 |
| H | -2.095917 | 6.067173  | -2.076698 |
| H | -1.382996 | 7.689106  | -1.889261 |
| H | -0.939303 | 6.675973  | -3.279500 |
| C | -1.381591 | 6.652492  | 0.670413  |
| H | -0.974190 | 7.672949  | 0.718733  |
| H | -2.328146 | 6.689709  | 0.116802  |
| H | -1.604865 | 6.336726  | 1.699200  |
| C | 0.835119  | 5.551134  | 0.925496  |
| H | 0.520654  | 5.180971  | 1.908241  |
| H | 1.548517  | 4.831515  | 0.501928  |
| H | 1.355121  | 6.505813  | 1.082314  |

170

Figure\_S7\_imid-3\_modeA\_prod(AS) / electronic energy: -4442.756176396671 a.u. / lowest freq: 11.29 cm<sup>-1</sup>

|    |           |           |           |
|----|-----------|-----------|-----------|
| C  | -0.763660 | -0.463398 | 3.227790  |
| H  | -1.006651 | 0.528649  | 3.635178  |
| C  | 0.706409  | -0.584791 | 2.787990  |
| H  | 1.088653  | -1.615173 | 2.891992  |
| C  | -0.646813 | -0.424628 | 0.887647  |
| C  | -2.881673 | -0.689731 | 1.742250  |
| C  | -3.372946 | -1.829431 | 1.096926  |
| C  | -3.767158 | 0.332625  | 2.124039  |
| C  | -4.737267 | -1.966990 | 0.846942  |
| H  | -2.658959 | -2.610571 | 0.816592  |
| C  | -5.130934 | 0.182430  | 1.864560  |
| C  | -5.618909 | -0.959519 | 1.233375  |
| H  | -5.113074 | -2.869126 | 0.357389  |
| H  | -5.802615 | 0.992604  | 2.154819  |
| H  | -6.689454 | -1.059124 | 1.043523  |
| S  | -3.235197 | 1.847096  | 2.941839  |
| O  | -4.328214 | 2.826916  | 2.699521  |
| O  | -1.982239 | 2.267013  | 2.239874  |
| O  | -3.040427 | 1.481793  | 4.356075  |
| Cu | -1.310699 | -0.629541 | -0.968394 |
| C  | -1.174396 | -1.534025 | 4.204310  |
| C  | -1.512392 | -1.190196 | 5.524946  |
| C  | -1.211019 | -2.887760 | 3.820399  |
| C  | -1.892526 | -2.177823 | 6.438083  |

|    |           |           |           |
|----|-----------|-----------|-----------|
| H  | -1.473574 | -0.159579 | 5.853064  |
| C  | -1.590711 | -3.871895 | 4.738246  |
| H  | -0.945949 | -3.179159 | 2.812405  |
| C  | -1.933396 | -3.517117 | 6.044732  |
| H  | -2.151935 | -1.904711 | 7.452746  |
| H  | -1.617266 | -4.911133 | 4.440084  |
| H  | -2.226329 | -4.280670 | 6.753666  |
| N  | -1.472100 | -0.598662 | 1.926159  |
| N  | 0.597720  | -0.290263 | 1.344942  |
| C  | -2.423510 | -0.325389 | -2.720427 |
| C  | -3.129785 | -1.370452 | -3.452778 |
| C  | -2.766445 | -1.667914 | -4.779363 |
| C  | -4.196341 | -2.085094 | -2.877543 |
| C  | -3.444804 | -2.645060 | -5.501939 |
| C  | -4.881655 | -3.049226 | -3.605230 |
| C  | -4.506062 | -3.338066 | -4.919174 |
| H  | -3.148817 | -2.860690 | -6.530883 |
| H  | -5.707109 | -3.592797 | -3.139296 |
| H  | -5.041065 | -4.102052 | -5.487649 |
| C  | -2.998101 | 0.403042  | -1.639910 |
| C  | -2.253308 | 1.332262  | -0.936400 |
| H  | -2.614966 | 1.791197  | -0.014788 |
| H  | -1.385282 | 1.808658  | -1.401727 |
| H  | -4.482396 | -1.891125 | -1.840141 |
| H  | -3.960627 | 0.075267  | -1.225446 |
| P  | -2.760592 | 4.771324  | -1.362028 |
| O  | -3.967859 | 4.013957  | -0.472379 |
| O  | -1.936361 | 5.378003  | -0.248878 |
| O  | -3.621140 | 5.933202  | -2.149686 |
| O  | -2.229445 | 3.854593  | -2.420407 |
| Na | -2.821163 | 4.459581  | 1.628092  |
| H  | -1.605183 | 0.170140  | -3.262281 |
| H  | -1.950598 | -1.110037 | -5.246706 |
| C  | -4.987180 | 3.311697  | -1.143452 |
| H  | -5.440077 | 2.600143  | -0.438053 |
| H  | -5.774600 | 3.991715  | -1.509375 |
| H  | -4.585878 | 2.755252  | -2.006177 |
| C  | -4.175799 | 6.989738  | -1.399464 |
| H  | -4.640100 | 7.696834  | -2.098670 |
| H  | -4.954146 | 6.635187  | -0.701696 |
| H  | -3.409336 | 7.522855  | -0.815701 |
| C  | 1.696963  | 0.001133  | 0.504781  |
| C  | 2.868269  | -0.762753 | 0.580661  |
| C  | 1.644524  | 1.101880  | -0.361983 |
| C  | 3.975523  | -0.431553 | -0.207640 |
| C  | 2.767797  | 1.464679  | -1.117385 |
| C  | 3.932780  | 0.691790  | -1.040968 |
| H  | 4.802650  | 0.962606  | -1.627969 |
| H  | 0.754385  | 1.714968  | -0.397303 |
| H  | 2.914047  | -1.623238 | 1.236900  |
| C  | 2.744634  | 2.690113  | -1.945637 |
| C  | 2.719986  | 2.595243  | -3.367672 |
| C  | 2.764642  | 3.970747  | -1.319145 |
| C  | 2.729425  | 3.779102  | -4.128001 |
| C  | 2.742263  | 5.122541  | -2.126992 |
| C  | 2.732153  | 5.024819  | -3.512843 |
| H  | 2.725433  | 3.742688  | -5.209339 |
| H  | 2.743558  | 6.109611  | -1.683892 |
| H  | 2.727251  | 5.923584  | -4.116196 |
| C  | 5.178303  | -1.280425 | -0.177616 |
| C  | 6.272748  | -0.934809 | 0.662012  |
| C  | 5.241115  | -2.441723 | -0.997204 |
| C  | 7.417927  | -1.752035 | 0.651785  |
| C  | 6.401693  | -3.235554 | -0.958577 |
| C  | 7.477102  | -2.889688 | -0.146743 |
| H  | 8.273626  | -1.512400 | 1.269151  |
| H  | 6.481365  | -4.127829 | -1.565511 |
| H  | 8.364696  | -3.509244 | -0.136152 |
| C  | 4.090683  | -2.848570 | -1.920828 |
| H  | 3.257329  | -2.119632 | -1.870353 |
| C  | 3.497510  | -4.199259 | -1.502103 |
| H  | 3.158649  | -4.152051 | -0.444842 |
| H  | 2.617821  | -4.443003 | -2.134936 |
| H  | 4.241805  | -5.016372 | -1.606559 |
| C  | 4.535573  | -2.867316 | -3.388175 |
| H  | 4.972008  | -1.883261 | -3.663587 |
| H  | 5.289567  | -3.661066 | -3.572280 |
| H  | 3.661429  | -3.053849 | -4.048097 |
| C  | 6.241959  | 0.293558  | 1.572645  |
| H  | 5.265126  | 0.815539  | 1.510484  |
| C  | 7.301175  | 1.317389  | 1.149210  |
| H  | 7.206240  | 2.238839  | 1.762779  |
| H  | 8.326929  | 0.911869  | 1.277569  |
| H  | 7.153936  | 1.595089  | 0.083402  |
| C  | 6.411296  | -0.100069 | 3.045216  |
| H  | 6.283096  | 0.793140  | 3.693245  |
| H  | 5.640328  | -0.848473 | 3.328097  |
| H  | 7.417128  | -0.528183 | 3.238129  |



|   |           |           |           |
|---|-----------|-----------|-----------|
| C | 2.818211  | 4.141047  | 0.200863  |
| H | 2.893923  | 3.163681  | 0.716631  |
| C | 2.670019  | 1.253479  | -4.098757 |
| H | 2.605708  | 0.411829  | -3.382082 |
| C | 1.422323  | 1.147310  | -4.986969 |
| H | 0.509089  | 1.333528  | -4.382565 |
| H | 1.454436  | 1.876040  | -5.823506 |
| H | 1.349965  | 0.126995  | -5.420739 |
| C | 3.946623  | 1.024471  | -4.915968 |
| H | 4.043086  | 1.773607  | -5.729935 |
| H | 4.837577  | 1.093641  | -4.256035 |
| H | 3.930570  | 0.010366  | -5.369654 |
| C | 1.537115  | 4.806066  | 0.717848  |
| H | 1.421676  | 5.831476  | 0.307939  |
| H | 0.653509  | 4.199965  | 0.425350  |
| H | 1.558324  | 4.873364  | 1.825199  |
| C | 4.063503  | 4.924564  | 0.634987  |
| H | 4.977070  | 4.438894  | 0.229604  |
| H | 4.026050  | 5.976352  | 0.282115  |
| H | 4.139027  | 4.931108  | 1.743671  |
| H | 0.735509  | 2.169379  | 2.681284  |
| H | 2.290933  | 3.704496  | 3.827651  |
| C | 1.503578  | 1.763126  | 3.326487  |
| C | 2.387353  | 2.636440  | 3.967358  |
| C | 1.625904  | 0.371806  | 3.503382  |
| C | 3.398279  | 2.132789  | 4.788540  |
| H | 4.082937  | 2.810530  | 5.281672  |
| C | 2.648375  | -0.123581 | 4.331496  |
| C | 3.526187  | 0.754564  | 4.973099  |
| H | 2.769835  | -1.189354 | 4.479583  |
| H | 4.311009  | 0.365354  | 5.608674  |
| C | -0.147633 | -2.160675 | -1.608635 |
| H | 0.691385  | -1.999019 | -0.916196 |
| C | 0.301498  | -2.025955 | -3.040476 |
| H | 0.714844  | -1.035797 | -3.274432 |
| H | 1.098182  | -2.753208 | -3.274639 |
| H | -0.506302 | -2.233080 | -3.754663 |
| B | -0.825459 | -3.488988 | -1.220756 |
| O | -0.943651 | -3.928370 | 0.085644  |
| O | -1.288470 | -4.413500 | -2.125606 |
| C | -1.877564 | -5.508449 | -1.378846 |
| C | -1.211942 | -5.352084 | 0.028010  |
| C | -3.377940 | -5.277619 | -1.346335 |
| H | -3.626348 | -4.325216 | -0.854609 |
| H | -3.764299 | -5.230704 | -2.372702 |
| H | -3.905218 | -6.086160 | -0.821974 |
| C | -1.557761 | -6.808920 | -2.083107 |
| H | -0.481944 | -6.926506 | -2.259447 |
| H | -1.907123 | -7.669051 | -1.494031 |
| H | -2.062720 | -6.845013 | -3.057528 |
| C | 0.135435  | -6.050669 | 0.126351  |
| H | 0.030096  | -7.143587 | 0.156416  |
| H | 0.785511  | -5.792106 | -0.721061 |
| H | 0.643516  | -5.733881 | 1.046981  |
| C | -2.099055 | -5.744181 | 1.187840  |
| H | -1.551699 | -5.643517 | 2.133042  |
| H | -3.000559 | -5.121868 | 1.249423  |
| H | -2.412151 | -6.794310 | 1.100040  |

170

Figure\_S7\_imid-3\_modeB.ed(AS) / electronic energy: -4442.756430877589 a.u. / lowest freq: 17.76 cm<sup>-1</sup>

|    |           |           |           |
|----|-----------|-----------|-----------|
| C  | 0.727062  | 3.324353  | -1.090977 |
| H  | 0.540394  | 3.890817  | -0.166269 |
| C  | -0.530732 | 2.619811  | -1.613567 |
| H  | -0.450301 | 2.399429  | -2.694020 |
| C  | 0.833106  | 1.028773  | -0.578092 |
| C  | 2.928364  | 2.160798  | -0.337095 |
| C  | 3.826289  | 1.385012  | -1.077763 |
| C  | 3.386284  | 2.839783  | 0.806452  |
| C  | 5.166236  | 1.301811  | -0.711119 |
| H  | 3.462420  | 0.843683  | -1.953909 |
| C  | 4.735906  | 2.756679  | 1.159000  |
| C  | 5.626500  | 1.996128  | 0.405732  |
| H  | 5.844112  | 0.698561  | -1.318096 |
| H  | 5.068265  | 3.284585  | 2.054318  |
| H  | 6.677666  | 1.943855  | 0.697188  |
| S  | 2.316203  | 3.812574  | 1.874280  |
| O  | 3.054941  | 3.932016  | 3.166767  |
| O  | 1.067355  | 3.010655  | 2.065882  |
| O  | 2.109723  | 5.097586  | 1.182836  |
| Cu | 1.656814  | -0.767824 | -0.462763 |
| C  | 1.374210  | 4.219525  | -2.115863 |
| C  | 1.356198  | 5.614746  | -1.942493 |
| C  | 1.982575  | 3.684400  | -3.265655 |
| C  | 1.949450  | 6.453668  | -2.890626 |
| H  | 0.875424  | 6.055884  | -1.078757 |
| C  | 2.575826  | 4.525983  | -4.210608 |
| H  | 1.999679  | 2.617872  | -3.429338 |
| C  | 2.561005  | 5.909773  | -4.022526 |

|    |           |           |           |
|----|-----------|-----------|-----------|
| H  | 1.932088  | 7.526544  | -2.749024 |
| H  | 3.045660  | 4.104799  | -5.089985 |
| H  | 3.019521  | 6.560641  | -4.755690 |
| N  | 1.567580  | 2.147117  | -0.747962 |
| N  | -0.434524 | 1.334756  | -0.891927 |
| C  | 2.249115  | -2.342430 | 0.717889  |
| C  | 1.557485  | -3.555089 | 0.263672  |
| C  | 2.253195  | -4.767161 | 0.134321  |
| C  | 0.198533  | -3.538397 | -0.093561 |
| C  | 1.613906  | -5.919143 | -0.317243 |
| C  | -0.441658 | -4.685851 | -0.547148 |
| C  | 0.261346  | -5.886503 | -0.658240 |
| H  | 2.179071  | -6.850289 | -0.409541 |
| H  | -1.499884 | -4.645668 | -0.811737 |
| H  | -0.241054 | -6.787361 | -1.018356 |
| C  | 1.657018  | -1.323802 | 1.488311  |
| C  | 2.465316  | -0.328945 | 2.234904  |
| H  | 3.459766  | -0.191269 | 1.784618  |
| H  | 1.976583  | 0.657579  | 2.286675  |
| H  | -0.347770 | -2.589731 | -0.053261 |
| H  | 0.618214  | -1.444954 | 1.819665  |
| P  | 1.729638  | -0.447144 | 4.786367  |
| O  | 2.510545  | -0.928260 | 6.095357  |
| O  | 1.238036  | 0.948467  | 4.945949  |
| O  | 0.553003  | -1.520937 | 4.534629  |
| O  | 2.750123  | -0.766546 | 3.614589  |
| Na | 1.278149  | 3.121225  | 4.528468  |
| H  | 3.345066  | -2.387159 | 0.680557  |
| H  | 3.317818  | -4.795296 | 0.380623  |
| C  | 3.080252  | -2.234926 | 6.171086  |
| H  | 3.414919  | -2.379399 | 7.202842  |
| H  | 2.337977  | -3.005034 | 5.919257  |
| H  | 3.938636  | -2.323638 | 5.492589  |
| C  | -0.641826 | -1.416263 | 5.305105  |
| H  | -1.186399 | -2.357420 | 5.186326  |
| H  | -0.424074 | -1.271577 | 6.373044  |
| H  | -1.263833 | -0.583664 | 4.950266  |
| C  | -1.501799 | 0.435295  | -0.671681 |
| C  | -2.358954 | 0.085449  | -1.720800 |
| C  | -1.784260 | -0.006520 | 0.632230  |
| C  | -3.484913 | -0.709499 | -1.475861 |
| C  | -2.946698 | -0.750174 | 0.894533  |
| C  | -3.781131 | -1.119316 | -0.168970 |
| H  | -4.683064 | -1.687811 | 0.024900  |
| H  | -1.151173 | 0.308995  | 1.452882  |
| H  | -2.158882 | 0.442106  | -2.723866 |
| C  | -3.367434 | -1.038105 | 2.289728  |
| C  | -3.361077 | -2.375237 | 2.786538  |
| C  | -3.854641 | 0.016923  | 3.118989  |
| C  | -3.858898 | -2.627192 | 4.078638  |
| C  | -4.305295 | -0.287444 | 4.417255  |
| C  | -4.315583 | -1.593943 | 4.884163  |
| H  | -3.883531 | -3.632478 | 4.477638  |
| H  | -4.668419 | 0.490965  | 5.075052  |
| H  | -4.679494 | -1.807662 | 5.880985  |
| C  | -4.398495 | -1.050510 | -2.584133 |
| C  | -5.634369 | -0.356319 | -2.723888 |
| C  | -4.037628 | -2.061176 | -3.520347 |
| C  | -6.498053 | -0.713945 | -3.775159 |
| C  | -4.916238 | -2.345986 | -4.582057 |
| C  | -6.136389 | -1.689728 | -4.696734 |
| H  | -7.454097 | -0.222304 | -3.897364 |
| H  | -4.663512 | -3.089623 | -5.326046 |
| H  | -6.805950 | -1.936111 | -5.510877 |
| C  | -2.727233 | -2.843696 | -3.413324 |
| H  | -2.177795 | -2.580592 | -2.486539 |
| C  | -1.793706 | -2.505572 | -4.580887 |
| H  | -1.617058 | -1.409468 | -4.620109 |
| H  | -0.812749 | -3.008757 | -4.442172 |
| H  | -2.227351 | -2.834566 | -5.548867 |
| C  | -2.979875 | -4.355647 | -3.331876 |
| H  | -3.642906 | -4.582979 | -2.469719 |
| H  | -3.448657 | -4.743174 | -4.259928 |
| H  | -2.019699 | -4.894512 | -3.186459 |
| C  | -6.045018 | 0.778158  | -1.782822 |
| H  | -5.235416 | 1.017775  | -1.063979 |
| C  | -7.265494 | 0.380558  | -0.945582 |
| H  | -7.505924 | 1.184727  | -0.217623 |
| H  | -8.154254 | 0.207996  | -1.588704 |
| H  | -7.048194 | -0.548077 | -0.375862 |
| C  | -6.306604 | 2.078029  | -2.554595 |
| H  | -6.456397 | 2.917713  | -1.842688 |
| H  | -5.434405 | 2.317763  | -3.199210 |
| H  | -7.212087 | 1.998185  | -3.191656 |
| C  | -3.922340 | 1.470998  | 2.652042  |
| H  | -3.598272 | 1.574548  | 1.599670  |
| C  | -2.819418 | -3.548543 | 1.975846  |
| H  | -2.430037 | -3.201942 | 1.001436  |

|   |           |           |           |
|---|-----------|-----------|-----------|
| C | -1.642956 | -4.223704 | 2.696912  |
| H | -0.822791 | -3.490744 | 2.850207  |
| H | -1.946976 | -4.634894 | 3.681509  |
| H | -1.248659 | -5.063896 | 2.088979  |
| C | -3.925948 | -4.561908 | 1.660624  |
| H | -4.302100 | -5.048477 | 2.585053  |
| H | -4.772434 | -4.054661 | 1.150524  |
| H | -3.536080 | -5.350204 | 0.981556  |
| C | -2.983637 | 2.349130  | 3.489967  |
| H | -3.292228 | 2.367823  | 4.556139  |
| H | -1.944726 | 1.960910  | 3.424102  |
| H | -2.987095 | 3.391371  | 3.111653  |
| C | -5.361245 | 2.003145  | 2.684839  |
| H | -6.025748 | 1.333339  | 2.097863  |
| H | -5.746046 | 2.074168  | 3.723501  |
| H | -5.403461 | 3.015015  | 2.229022  |
| H | -1.621283 | 3.341754  | 0.815389  |
| H | -3.696849 | 4.623305  | 1.209356  |
| C | -2.213288 | 3.669828  | -0.029206 |
| C | -3.391209 | 4.388213  | 0.199663  |
| C | -1.804906 | 3.377777  | -1.343350 |
| C | -4.175489 | 4.811202  | -0.874916 |
| H | -5.088347 | 5.363825  | -0.694454 |
| C | -2.604066 | 3.807521  | -2.417867 |
| C | -3.781201 | 4.522643  | -2.182446 |
| H | -2.315778 | 3.593887  | -3.439544 |
| H | -4.389916 | 4.850973  | -3.014950 |
| C | 1.812957  | -1.442286 | -2.389526 |
| H | 1.127501  | -2.298590 | -2.256698 |
| C | 1.315304  | -0.487699 | -3.455705 |
| H | 0.347936  | -0.014935 | -3.214497 |
| H | 2.029913  | 0.331408  | -3.632100 |
| H | 1.177486  | -0.969592 | -4.442739 |
| B | 3.251008  | -1.919579 | -2.499910 |
| O | 4.289971  | -1.186109 | -3.089110 |
| O | 3.731876  | -3.147677 | -2.044476 |
| C | 5.164477  | -3.131289 | -2.148412 |
| C | 5.390267  | -2.092567 | -3.292710 |
| C | 5.724457  | -2.650807 | -0.816720 |
| H | 5.372152  | -1.633817 | -0.583047 |
| H | 5.387918  | -3.318802 | -0.011276 |
| H | 6.823647  | -2.646457 | -0.804931 |
| C | 5.652272  | -4.531447 | -2.455128 |
| H | 5.154542  | -4.949389 | -3.338801 |
| H | 6.738163  | -4.544308 | -2.630339 |
| H | 5.443022  | -5.200539 | -1.608292 |
| C | 5.219224  | -2.710603 | -4.674095 |
| H | 6.056697  | -3.371328 | -4.938505 |
| H | 4.288876  | -3.292738 | -4.737529 |
| H | 5.168126  | -1.912608 | -5.427348 |
| C | 6.700976  | -1.339842 | -3.221935 |
| H | 6.758481  | -0.597171 | -4.029651 |
| H | 6.828919  | -0.811098 | -2.269677 |
| H | 7.551992  | -2.026761 | -3.339744 |

170

Figure\_S7\_imid-3\_modeB ts(AS)\_01 / electronic energy: -4442.742828980603 a.u. / lowest freq: -268.37 cm-1

|    |           |           |           |
|----|-----------|-----------|-----------|
| C  | 0.693791  | 3.551061  | -0.293825 |
| H  | 0.527794  | 3.881407  | 0.741837  |
| C  | -0.570367 | 2.972004  | -0.941155 |
| H  | -0.521514 | 3.017285  | -2.044502 |
| C  | 0.833170  | 1.209036  | -0.338108 |
| C  | 2.917575  | 2.267758  | 0.156216  |
| C  | 3.826414  | 1.717763  | -0.751815 |
| C  | 3.354737  | 2.622887  | 1.445719  |
| C  | 5.159602  | 1.530450  | -0.397387 |
| H  | 3.479744  | 1.436642  | -1.748681 |
| C  | 4.697376  | 2.442011  | 1.784619  |
| C  | 5.599107  | 1.899652  | 0.871502  |
| H  | 5.847957  | 1.101685  | -1.127871 |
| H  | 5.016621  | 2.713511  | 2.792153  |
| H  | 6.643936  | 1.761923  | 1.157529  |
| S  | 2.255677  | 3.274995  | 2.713000  |
| O  | 3.001438  | 3.124673  | 3.996713  |
| O  | 1.048687  | 2.392249  | 2.702949  |
| O  | 1.988690  | 4.675492  | 2.338760  |
| Cu | 1.643244  | -0.579051 | -0.589585 |
| C  | 1.313134  | 4.668470  | -1.091990 |
| C  | 1.308570  | 5.980809  | -0.586835 |
| C  | 1.886046  | 4.426843  | -2.353793 |
| C  | 1.878928  | 7.024277  | -1.322086 |
| H  | 0.855849  | 6.200760  | 0.371529  |
| C  | 2.456372  | 5.472290  | -3.085195 |
| H  | 1.893014  | 3.431112  | -2.770139 |
| C  | 2.454484  | 6.770015  | -2.569107 |
| H  | 1.871860  | 8.031405  | -0.925766 |
| H  | 2.898561  | 5.276097  | -4.053403 |
| H  | 2.895308  | 7.579042  | -3.137041 |
| N  | 1.555386  | 2.338897  | -0.251584 |

|    |           |           |           |
|----|-----------|-----------|-----------|
| N  | -0.442977 | 1.552137  | -0.552319 |
| C  | 2.218793  | -2.442632 | 0.053504  |
| C  | 1.611841  | -3.562632 | -0.671801 |
| C  | 2.377710  | -4.685511 | -1.021100 |
| C  | 0.260773  | -3.539512 | -1.055213 |
| C  | 1.807683  | -5.756180 | -1.704258 |
| C  | -0.311039 | -4.606296 | -1.739119 |
| C  | 0.459461  | -5.724119 | -2.063193 |
| H  | 2.421808  | -6.622463 | -1.962404 |
| H  | -1.366870 | -4.569571 | -2.013187 |
| H  | 0.011359  | -6.562146 | -2.601863 |
| C  | 1.556654  | -1.742417 | 1.096779  |
| C  | 2.195266  | -0.753334 | 1.874643  |
| H  | 3.204366  | -0.432322 | 1.600138  |
| H  | 1.598520  | 0.004421  | 2.387568  |
| H  | -0.336397 | -2.647295 | -0.841127 |
| H  | 0.522017  | -2.002157 | 1.344499  |
| P  | 1.798099  | -1.615355 | 4.622967  |
| O  | 2.397206  | -2.494050 | 5.852790  |
| O  | 1.240577  | -0.350006 | 5.207138  |
| O  | 0.603802  | -2.551218 | 4.015432  |
| O  | 2.859632  | -1.577980 | 3.510710  |
| Na | 1.384930  | 1.839780  | 5.135052  |
| H  | 3.315861  | -2.403754 | 0.034480  |
| H  | 3.436332  | -4.710673 | -0.751600 |
| C  | 2.949171  | -3.772682 | 5.585030  |
| H  | 3.298795  | -4.188112 | 6.536866  |
| H  | 2.196772  | -4.452477 | 5.155884  |
| H  | 3.798494  | -3.705303 | 4.889991  |
| C  | -0.586525 | -2.681888 | 4.771251  |
| H  | -1.130556 | -3.553356 | 4.390511  |
| H  | -0.377112 | -2.847173 | 5.839477  |
| H  | -1.222473 | -1.789473 | 4.675833  |
| C  | -1.492590 | 0.605025  | -0.554425 |
| C  | -2.361881 | 0.518561  | -1.647580 |
| C  | -1.747334 | -0.161309 | 0.596566  |
| C  | -3.471067 | -0.333447 | -1.600679 |
| C  | -2.896151 | -0.967156 | 0.674056  |
| C  | -3.741843 | -1.066633 | -0.438481 |
| H  | -4.633904 | -1.679487 | -0.385683 |
| H  | -1.106054 | -0.055348 | 1.463389  |
| H  | -2.183657 | 1.121579  | -2.529556 |
| C  | -3.298830 | -1.602806 | 1.955018  |
| C  | -3.292213 | -3.022992 | 2.092365  |
| C  | -3.782856 | -0.795800 | 3.029042  |
| C  | -3.789095 | -3.597486 | 3.277475  |
| C  | -4.226293 | -1.422811 | 4.208588  |
| C  | -4.239110 | -2.805272 | 4.323765  |
| H  | -3.817432 | -4.671439 | 3.404475  |
| H  | -4.584252 | -0.839115 | 5.046222  |
| H  | -4.600079 | -3.267419 | 5.233654  |
| C  | -4.392149 | -0.404333 | -2.751211 |
| C  | -5.636962 | 0.285948  | -2.707227 |
| C  | -4.030835 | -1.153272 | -3.906963 |
| C  | -6.508743 | 0.182545  | -3.806420 |
| C  | -4.919567 | -1.186551 | -4.997489 |
| C  | -6.147883 | -0.537724 | -4.939434 |
| H  | -7.471229 | 0.676745  | -3.797539 |
| H  | -4.667931 | -1.726128 | -5.900799 |
| H  | -6.824562 | -0.589358 | -5.782804 |
| C  | -2.708732 | -1.917442 | -4.004250 |
| H  | -2.146517 | -1.871457 | -3.049244 |
| C  | -1.798799 | -1.298750 | -5.071166 |
| H  | -1.639270 | -0.220799 | -4.854640 |
| H  | -0.808303 | -1.802332 | -5.065270 |
| H  | -2.242293 | -1.400263 | -6.084205 |
| C  | -2.940499 | -3.409768 | -4.276959 |
| H  | -3.578853 | -3.845865 | -3.478808 |
| H  | -3.427559 | -3.575436 | -5.260116 |
| H  | -1.970082 | -3.949635 | -4.283348 |
| C  | -6.049088 | 1.150577  | -1.514040 |
| H  | -5.234892 | 1.215547  | -0.764011 |
| C  | -7.257404 | 0.546083  | -0.790727 |
| H  | -7.496818 | 1.143611  | 0.114877  |
| H  | -8.151404 | 0.527711  | -1.449274 |
| H  | -7.026255 | -0.491846 | -0.468997 |
| C  | -6.329984 | 2.596812  | -1.941968 |
| H  | -6.484254 | 3.234107  | -1.045073 |
| H  | -5.464606 | 2.998260  | -2.511012 |
| H  | -7.238692 | 2.664553  | -2.575835 |
| C  | -3.858082 | 0.729088  | 2.949144  |
| H  | -3.546709 | 1.099205  | 1.954752  |
| C  | -2.754213 | -3.950785 | 1.006596  |
| H  | -2.356371 | -3.367929 | 0.155332  |
| C  | -1.587212 | -4.800674 | 1.532688  |
| H  | -0.761313 | -4.141197 | 1.872769  |
| H  | -1.899333 | -5.449462 | 2.376707  |
| H  | -1.197548 | -5.460362 | 0.730740  |

|   |           |           |           |
|---|-----------|-----------|-----------|
| C | -3.866881 | -4.839481 | 0.438093  |
| H | -4.251118 | -5.544068 | 1.205425  |
| H | -4.707399 | -4.211517 | 0.073445  |
| H | -3.479896 | -5.430052 | -0.419764 |
| C | -2.911198 | 1.368280  | 3.973256  |
| H | -3.209330 | 1.114836  | 5.012142  |
| H | -1.873245 | 1.011553  | 3.801100  |
| H | -2.918114 | 2.472420  | 3.871224  |
| C | -5.297299 | 1.229682  | 3.131332  |
| H | -5.967615 | 0.728373  | 2.400457  |
| H | -5.670616 | 1.033394  | 4.157970  |
| H | -5.345924 | 2.323929  | 2.948064  |
| H | -1.598043 | 3.050471  | 1.616157  |
| H | -3.672990 | 4.160682  | 2.369114  |
| C | -2.216684 | 3.569166  | 0.895202  |
| C | -3.394222 | 4.188951  | 1.325170  |
| C | -1.842880 | 3.619479  | -0.460094 |
| C | -4.212716 | 4.852634  | 0.409499  |
| H | -5.125359 | 5.328105  | 0.744571  |
| C | -2.675620 | 4.290068  | -1.373542 |
| C | -3.852527 | 4.904908  | -0.938149 |
| H | -2.413941 | 4.341741  | -2.422979 |
| H | -4.487525 | 5.420069  | -1.647215 |
| C | 1.789540  | -0.805965 | -2.606845 |
| H | 1.121408  | -1.681752 | -2.678225 |
| C | 1.268684  | 0.363214  | -3.412373 |
| H | 0.285866  | 0.733667  | -3.080790 |
| H | 1.960345  | 1.218611  | -3.389632 |
| H | 1.151791  | 0.111481  | -4.482725 |
| B | 3.242931  | -1.219678 | -2.856602 |
| O | 4.247605  | -0.348891 | -3.271684 |
| O | 3.730629  | -2.511186 | -2.728361 |
| C | 5.165157  | -2.455514 | -2.859460 |
| C | 5.358897  | -1.162817 | -3.713616 |
| C | 5.749920  | -2.317248 | -1.461490 |
| H | 5.401987  | -1.393824 | -0.972657 |
| H | 5.434457  | -3.167494 | -0.840777 |
| H | 6.848688  | -2.307213 | -1.471502 |
| C | 5.647566  | -3.731105 | -3.515036 |
| H | 5.123967  | -3.929314 | -4.458277 |
| H | 6.727129  | -3.687335 | -3.719981 |
| H | 5.470087  | -4.588397 | -2.850811 |
| C | 5.163731  | -1.416267 | -5.201338 |
| H | 5.996316  | -1.989066 | -5.632734 |
| H | 4.232008  | -1.967019 | -5.392919 |
| H | 5.102851  | -0.456451 | -5.731778 |
| C | 6.660039  | -0.430623 | -3.475107 |
| H | 6.689966  | 0.494694  | -4.066317 |
| H | 6.803986  | -0.162907 | -2.421719 |
| H | 7.515246  | -1.049983 | -3.782028 |

170

Figure\_S7\_imid-3\_modeB\_ts(AS)\_02 / electronic energy: -4442.738705631423 a.u. / lowest freq: -273.52 cm-1

|    |           |           |           |
|----|-----------|-----------|-----------|
| C  | 0.627776  | -1.803124 | 2.917779  |
| H  | 0.644635  | -2.823216 | 2.508014  |
| C  | -0.743404 | -1.131415 | 2.785837  |
| H  | -0.862564 | -0.306955 | 3.512668  |
| C  | 0.668847  | -0.271708 | 1.141657  |
| C  | 2.852198  | -0.970584 | 1.832654  |
| C  | 3.539306  | 0.234531  | 2.004039  |
| C  | 3.556178  | -2.113618 | 1.407941  |
| C  | 4.910874  | 0.311042  | 1.778646  |
| H  | 2.987214  | 1.120675  | 2.324363  |
| C  | 4.935037  | -2.027394 | 1.204197  |
| C  | 5.614607  | -0.825316 | 1.387749  |
| H  | 5.421350  | 1.264002  | 1.929736  |
| H  | 5.462428  | -2.923651 | 0.873284  |
| H  | 6.692776  | -0.779358 | 1.219839  |
| S  | 2.756878  | -3.685313 | 1.046215  |
| O  | 3.762559  | -4.478529 | 0.283423  |
| O  | 1.590937  | -3.334198 | 0.175873  |
| O  | 2.393996  | -4.278118 | 2.345521  |
| Cu | 1.316726  | 1.187671  | -0.026857 |
| C  | 1.145605  | -1.813881 | 4.332465  |
| C  | 1.213591  | -3.023243 | 5.046522  |
| C  | 1.539762  | -0.623701 | 4.970476  |
| C  | 1.685406  | -3.042994 | 6.362399  |
| H  | 0.892015  | -3.950576 | 4.590158  |
| C  | 2.012236  | -0.647605 | 6.285568  |
| H  | 1.483959  | 0.320763  | 4.450964  |
| C  | 2.087206  | -1.856682 | 6.980561  |
| H  | 1.735840  | -3.978469 | 6.904393  |
| H  | 2.318350  | 0.272365  | 6.766588  |
| H  | 2.451806  | -1.873689 | 7.999466  |
| N  | 1.440625  | -0.939523 | 2.016023  |
| N  | -0.611066 | -0.519865 | 1.448074  |
| C  | 1.866712  | 2.001788  | -1.822902 |
| C  | 1.045553  | 3.132829  | -2.263873 |
| C  | 1.636707  | 4.258794  | -2.857142 |

|    |           |           |           |
|----|-----------|-----------|-----------|
| C  | -0.348089 | 3.130250  | -2.092321 |
| C  | 0.858815  | 5.328667  | -3.291031 |
| C  | -1.127758 | 4.195556  | -2.527352 |
| C  | -0.527441 | 5.299925  | -3.134018 |
| H  | 1.338798  | 6.193688  | -3.755373 |
| H  | -2.211136 | 4.160077  | -2.401350 |
| H  | -1.138909 | 6.138952  | -3.473680 |
| C  | 1.472091  | 0.647952  | -1.997950 |
| C  | 2.322167  | -0.435670 | -1.692992 |
| H  | 3.258061  | -0.236650 | -1.160770 |
| H  | 1.885261  | -1.420454 | -1.510501 |
| H  | -0.816138 | 2.286752  | -1.573861 |
| H  | 0.492491  | 0.425493  | -2.434698 |
| P  | 3.197868  | -2.395818 | -3.643076 |
| O  | 4.278361  | -3.172612 | -2.672323 |
| O  | 1.948756  | -3.212778 | -3.474553 |
| O  | 3.852593  | -2.468886 | -5.124577 |
| O  | 3.236004  | -0.892646 | -3.327993 |
| Na | 2.461794  | -4.641832 | -1.718133 |
| H  | 2.939620  | 2.204820  | -1.712107 |
| H  | 2.722819  | 4.288864  | -2.972456 |
| C  | 5.571040  | -2.633206 | -2.460548 |
| H  | 6.066275  | -3.244710 | -1.697460 |
| H  | 6.171458  | -2.660465 | -3.383210 |
| H  | 5.518214  | -1.591757 | -2.108487 |
| C  | 3.949887  | -3.731702 | -5.765103 |
| H  | 4.368113  | -3.563119 | -6.763442 |
| H  | 4.618355  | -4.411403 | -5.213586 |
| H  | 2.964286  | -4.208557 | -5.866095 |
| C  | -1.680584 | -0.131180 | 0.608699  |
| C  | -2.756811 | 0.596703  | 1.127602  |
| C  | -1.729004 | -0.587505 | -0.719638 |
| C  | -3.867207 | 0.884359  | 0.324712  |
| C  | -2.865818 | -0.355374 | -1.511527 |
| C  | -3.922160 | 0.404341  | -0.991243 |
| H  | -4.806946 | 0.580314  | -1.591325 |
| H  | -0.924108 | -1.202700 | -1.103539 |
| H  | -2.737704 | 0.926837  | 2.159014  |
| C  | -3.018910 | -1.022509 | -2.830224 |
| C  | -3.005264 | -0.260702 | -4.036853 |
| C  | -3.245438 | -2.431092 | -2.891511 |
| C  | -3.222019 | -0.917800 | -5.262604 |
| C  | -3.420482 | -3.040731 | -4.147957 |
| C  | -3.415236 | -2.290733 | -5.315179 |
| H  | -3.237425 | -0.366206 | -6.193137 |
| H  | -3.581495 | -4.107538 | -4.229201 |
| H  | -3.568408 | -2.777685 | -6.269826 |
| C  | -5.011038 | 1.625449  | 0.893437  |
| C  | -6.200596 | 0.928569  | 1.252777  |
| C  | -4.916237 | 3.030919  | 1.104972  |
| C  | -7.282421 | 1.658942  | 1.777409  |
| C  | -6.008776 | 3.704534  | 1.681963  |
| C  | -7.181043 | 3.027536  | 1.997803  |
| H  | -8.208467 | 1.164631  | 2.039658  |
| H  | -5.961783 | 4.766480  | 1.882811  |
| H  | -8.016865 | 3.567738  | 2.423756  |
| C  | -3.666133 | 3.830795  | 0.732783  |
| H  | -2.930127 | 3.196905  | 0.197410  |
| C  | -2.959475 | 4.352325  | 1.988867  |
| H  | -2.718954 | 3.507122  | 2.668386  |
| H  | -2.007242 | 4.852530  | 1.709937  |
| H  | -3.597081 | 5.080493  | 2.533494  |
| C  | -3.997575 | 4.981663  | -0.227408 |
| H  | -4.501370 | 4.585292  | -1.134923 |
| H  | -4.655398 | 5.737174  | 0.249701  |
| H  | -3.063901 | 5.495180  | -0.540568 |
| C  | -6.333324 | -0.589394 | 1.112285  |
| H  | -5.379543 | -1.048154 | 0.781881  |
| C  | -7.380514 | -0.952133 | 0.053726  |
| H  | -7.414595 | -2.053787 | -0.086040 |
| H  | -8.391145 | -0.602146 | 0.352713  |
| H  | -7.112818 | -0.487977 | -0.919381 |
| C  | -6.660345 | -1.249106 | 2.458298  |
| H  | -6.598760 | -2.354334 | 2.363496  |
| H  | -5.928699 | -0.922888 | 3.227506  |
| H  | -7.682665 | -0.987205 | 2.802425  |
| C  | -3.329071 | -3.310145 | -1.643039 |
| H  | -3.235411 | -2.710667 | -0.718144 |
| C  | -2.758198 | 1.244824  | -4.055325 |
| H  | -2.543445 | 1.616179  | -3.037093 |
| C  | -1.534833 | 1.598262  | -4.915581 |
| H  | -0.638726 | 1.058211  | -4.544267 |
| H  | -1.694505 | 1.335777  | -5.981683 |
| H  | -1.331160 | 2.687644  | -4.866168 |
| C  | -4.001827 | 2.001419  | -4.536263 |
| H  | -4.234024 | 1.761604  | -5.595342 |
| H  | -4.877346 | 1.734013  | -3.907101 |
| H  | -3.836435 | 3.096793  | -4.450513 |

|   |           |           |           |
|---|-----------|-----------|-----------|
| C | -2.184238 | -4.331735 | -1.623792 |
| H | -2.249717 | -5.028854 | -2.485173 |
| H | -1.207135 | -3.804451 | -1.661907 |
| H | -2.216053 | -4.932212 | -0.692153 |
| C | -4.694589 | -4.002233 | -1.537742 |
| H | -5.506925 | -3.245762 | -1.587439 |
| H | -4.840073 | -4.742390 | -2.352005 |
| H | -4.778315 | -4.533585 | -0.566067 |
| H | -1.357072 | -3.295053 | 1.190296  |
| H | -3.244682 | -4.868625 | 1.451865  |
| C | -2.058584 | -3.155724 | 2.002661  |
| C | -3.128826 | -4.045066 | 2.142168  |
| C | -1.898205 | -2.091446 | 2.908537  |
| C | -4.049782 | -3.877878 | 3.177795  |
| H | -4.878550 | -4.566107 | 3.281533  |
| C | -2.833708 | -1.931427 | 3.946309  |
| C | -3.901236 | -2.823135 | 4.080050  |
| H | -2.736068 | -1.119734 | 4.656371  |
| H | -4.616208 | -2.694022 | 4.882245  |
| C | 1.085921  | 2.881913  | 1.080307  |
| H | 0.362112  | 3.371463  | 0.405904  |
| C | 0.501243  | 2.659166  | 2.457492  |
| H | -0.395960 | 2.020281  | 2.463229  |
| H | 1.227576  | 2.202608  | 3.146634  |
| H | 0.199512  | 3.607882  | 2.938829  |
| B | 2.445284  | 3.584089  | 1.012189  |
| O | 3.414252  | 3.520925  | 2.010426  |
| O | 2.870024  | 4.386344  | -0.036939 |
| C | 4.262025  | 4.692536  | 0.178998  |
| C | 4.381347  | 4.558530  | 1.728821  |
| C | 5.082796  | 3.642648  | -0.555319 |
| H | 4.882953  | 2.633512  | -0.162050 |
| H | 4.823999  | 3.648075  | -1.623339 |
| H | 6.162344  | 3.832472  | -0.477434 |
| C | 4.551144  | 6.074584  | -0.365092 |
| H | 3.864750  | 6.824930  | 0.045820  |
| H | 5.580989  | 6.383612  | -0.133950 |
| H | 4.438041  | 6.083367  | -1.458155 |
| C | 3.918309  | 5.811848  | 2.457221  |
| H | 4.632681  | 6.639200  | 2.345051  |
| H | 2.939445  | 6.151168  | 2.089920  |
| H | 3.818361  | 5.595998  | 3.529490  |
| C | 5.745286  | 4.139791  | 2.230200  |
| H | 5.725441  | 4.005758  | 3.320329  |
| H | 6.088029  | 3.200316  | 1.780000  |
| H | 6.494804  | 4.911740  | 2.003235  |

170

Figure\_S7\_imid-3\_modeB\_ts(AS)\_03 / electronic energy: -4442.736147780118 a.u. / lowest freq: -229.89 cm-1

|    |           |           |           |
|----|-----------|-----------|-----------|
| C  | 0.306971  | 3.481621  | -1.375055 |
| H  | -0.244402 | 3.593592  | -2.321195 |
| C  | 1.336008  | 2.335376  | -1.430194 |
| H  | 2.260550  | 2.548118  | -0.866050 |
| C  | -0.439214 | 1.703198  | -0.025515 |
| C  | -1.890289 | 3.653265  | -0.086027 |
| C  | -1.952812 | 4.575691  | 0.962424  |
| C  | -3.049217 | 3.414028  | -0.852992 |
| C  | -3.145603 | 5.216720  | 1.287918  |
| H  | -1.050292 | 4.789722  | 1.535908  |
| C  | -4.240126 | 4.061944  | -0.520621 |
| C  | -4.295965 | 4.948837  | 0.552035  |
| H  | -3.169701 | 5.924889  | 2.118611  |
| H  | -5.123987 | 3.864717  | -1.128493 |
| H  | -5.238261 | 5.442101  | 0.799965  |
| S  | -3.058074 | 2.363426  | -2.324035 |
| O  | -4.462913 | 2.423897  | -2.827699 |
| O  | -2.736012 | 0.977439  | -1.876290 |
| O  | -2.070318 | 2.955515  | -3.243422 |
| Cu | -1.134682 | 0.999146  | 1.690648  |
| C  | 0.906477  | 4.804090  | -0.971549 |
| C  | 0.856935  | 5.898842  | -1.852096 |
| C  | 1.517667  | 4.965913  | 0.284047  |
| C  | 1.409329  | 7.128876  | -1.481734 |
| H  | 0.393489  | 5.801697  | -2.825986 |
| C  | 2.067691  | 6.196555  | 0.651530  |
| H  | 1.559277  | 4.141682  | 0.979506  |
| C  | 2.014192  | 7.277695  | -0.231099 |
| H  | 1.368279  | 7.967261  | -2.164984 |
| H  | 2.534130  | 6.311851  | 1.621382  |
| H  | 2.440535  | 8.230711  | 0.054097  |
| N  | -0.658132 | 2.986342  | -0.369027 |
| N  | 0.619178  | 1.251244  | -0.711635 |
| C  | -2.021531 | -0.184892 | 3.057222  |
| C  | -1.048994 | -0.970668 | 3.818478  |
| C  | -1.084015 | -0.989943 | 5.223194  |
| C  | -0.051834 | -1.725824 | 3.172814  |
| C  | -0.180105 | -1.760843 | 5.951237  |
| C  | 0.841297  | -2.503240 | 3.898755  |
| C  | 0.778752  | -2.530324 | 5.293473  |

|    |           |           |           |
|----|-----------|-----------|-----------|
| H  | -0.232101 | -1.767153 | 7.042554  |
| H  | 1.599528  | -3.089266 | 3.375930  |
| H  | 1.483773  | -3.139723 | 5.863483  |
| C  | -2.472200 | -0.560900 | 1.755088  |
| C  | -3.435403 | 0.195343  | 1.066331  |
| H  | -3.743930 | 1.158374  | 1.483378  |
| H  | -3.501135 | 0.122701  | -0.018626 |
| H  | 0.023898  | -1.687087 | 2.082339  |
| H  | -2.102078 | -1.474660 | 1.282449  |
| P  | -5.620467 | -1.604877 | 0.375245  |
| O  | -7.139675 | -2.084497 | 0.708549  |
| O  | -5.553101 | -1.334782 | -1.101628 |
| O  | -4.706089 | -2.898646 | 0.777964  |
| O  | -5.230623 | -0.525465 | 1.395937  |
| Na | -4.972257 | 0.145924  | -2.626881 |
| H  | -2.673795 | 0.473047  | 3.645733  |
| H  | -1.848783 | -0.407551 | 5.744507  |
| C  | -7.477551 | -2.424576 | 2.042892  |
| H  | -8.528212 | -2.735880 | 2.049574  |
| H  | -6.859134 | -3.256061 | 2.415602  |
| H  | -7.353998 | -1.566806 | 2.719557  |
| C  | -4.822733 | -4.065754 | -0.014047 |
| H  | -4.228369 | -4.853461 | 0.461931  |
| H  | -5.867186 | -4.409971 | -0.077752 |
| H  | -4.450138 | -3.898432 | -1.035353 |
| C  | 1.038489  | -0.109596 | -0.662670 |
| C  | 2.405895  | -0.445282 | -0.647549 |
| C  | 0.087749  | -1.140163 | -0.804090 |
| C  | 2.815661  | -1.782781 | -0.792434 |
| C  | 0.493265  | -2.472416 | -0.993232 |
| C  | 1.856254  | -2.785247 | -0.979067 |
| H  | 2.173106  | -3.802819 | -1.174808 |
| H  | -0.963309 | -0.893243 | -0.879410 |
| H  | 3.153688  | 0.332706  | -0.578553 |
| C  | -0.486229 | -3.510383 | -1.406743 |
| C  | -0.858695 | -4.562743 | -0.516938 |
| C  | -1.005771 | -3.498979 | -2.736759 |
| C  | -1.764740 | -5.543666 | -0.961844 |
| C  | -1.922369 | -4.494772 | -3.121427 |
| C  | -2.295775 | -5.501664 | -2.243113 |
| H  | -2.065745 | -6.355430 | -0.313069 |
| H  | -2.342104 | -4.506422 | -4.118579 |
| H  | -2.995569 | -6.263517 | -2.561942 |
| C  | 4.253333  | -2.137345 | -0.890807 |
| C  | 4.947794  | -1.945251 | -2.121854 |
| C  | 4.903625  | -2.810216 | 0.187288  |
| C  | 6.268745  | -2.418171 | -2.240290 |
| C  | 6.221533  | -3.270448 | 0.009494  |
| C  | 6.895852  | -3.066285 | -1.185694 |
| H  | 6.815916  | -2.313279 | -3.167417 |
| H  | 6.732011  | -3.811579 | 0.794498  |
| H  | 7.907359  | -3.433622 | -1.303549 |
| C  | 4.196800  | -3.113877 | 1.506418  |
| H  | 3.244021  | -2.548766 | 1.573623  |
| C  | 5.035292  | -2.693772 | 2.723302  |
| H  | 5.428721  | -1.666207 | 2.589740  |
| H  | 4.407486  | -2.723724 | 3.638947  |
| H  | 5.895407  | -3.376850 | 2.883584  |
| C  | 3.855202  | -4.604474 | 1.593102  |
| H  | 3.268257  | -4.910401 | 0.705099  |
| H  | 4.776968  | -5.223283 | 1.632433  |
| H  | 3.252798  | -4.807108 | 2.503586  |
| C  | 4.289224  | -1.310587 | -3.347101 |
| H  | 3.273182  | -0.936139 | -3.114042 |
| C  | 4.110156  | -2.344051 | -4.465311 |
| H  | 3.537136  | -1.898758 | -5.306957 |
| H  | 5.091195  | -2.693699 | -4.850648 |
| H  | 3.539673  | -3.218287 | -4.084582 |
| C  | 5.086264  | -0.096623 | -3.842039 |
| H  | 4.603092  | 0.330249  | -4.742599 |
| H  | 5.118631  | 0.682855  | -3.051022 |
| H  | 6.123864  | -0.368228 | -4.123740 |
| C  | -0.577857 | -2.466108 | -3.780234 |
| H  | 0.165920  | -1.759437 | -3.367213 |
| C  | -0.289849 | -4.692412 | 0.893558  |
| H  | 0.403590  | -3.858670 | 1.116128  |
| C  | -1.400527 | -4.639805 | 1.952444  |
| H  | -2.011136 | -3.724183 | 1.825352  |
| H  | -2.070130 | -5.522309 | 1.883568  |
| H  | -0.955922 | -4.624927 | 2.969836  |
| C  | 0.521778  | -5.986616 | 1.035232  |
| H  | -0.134112 | -6.881571 | 0.991680  |
| H  | 1.269579  | -6.060876 | 0.218121  |
| H  | 1.056550  | -5.994640 | 2.008592  |
| C  | -1.775696 | -1.625548 | -4.237587 |
| H  | -2.518400 | -2.242265 | -4.785540 |
| H  | -2.270513 | -1.170161 | -3.355780 |
| H  | -1.440236 | -0.808429 | -4.908747 |



|   |           |           |           |
|---|-----------|-----------|-----------|
| C | 0.116947  | -3.133677 | -4.973622 |
| H | 0.967388  | -3.753889 | -4.617975 |
| H | -0.584857 | -3.777725 | -5.543821 |
| H | 0.518732  | -2.358690 | -5.661021 |
| H | 0.021982  | 0.687803  | -3.230365 |
| H | 0.565602  | 0.337968  | -5.609398 |
| C | 0.887158  | 1.178636  | -3.651901 |
| C | 1.178802  | 0.993432  | -5.006600 |
| C | 1.690406  | 2.020397  | -2.860815 |
| C | 2.245668  | 1.676418  | -5.593397 |
| H | 2.462199  | 1.540975  | -6.645037 |
| C | 2.760273  | 2.704327  | -3.463200 |
| C | 3.029473  | 2.539430  | -4.824372 |
| H | 3.370041  | 3.386589  | -2.883657 |
| H | 3.851695  | 3.074511  | -5.281395 |
| C | -0.230955 | 2.293381  | 2.964758  |
| H | -0.264388 | 3.128916  | 2.250608  |
| C | -1.026644 | 2.609110  | 4.211268  |
| H | -2.075640 | 2.879820  | 4.001391  |
| H | -1.047850 | 1.760970  | 4.914387  |
| H | -0.596581 | 3.454113  | 4.780766  |
| B | 1.245224  | 1.935185  | 3.169256  |
| O | 1.824773  | 1.781120  | 4.413970  |
| O | 2.187468  | 1.841056  | 2.154246  |
| C | 3.489476  | 1.950447  | 2.766266  |
| C | 3.219392  | 1.459750  | 4.230499  |
| C | 4.471509  | 1.101180  | 1.989057  |
| H | 4.076283  | 0.093056  | 1.822605  |
| H | 4.672012  | 1.548084  | 1.005743  |
| H | 5.433067  | 1.018643  | 2.515692  |
| C | 3.901873  | 3.413840  | 2.708349  |
| H | 3.193039  | 4.056570  | 3.249217  |
| H | 4.901923  | 3.573208  | 3.134875  |
| H | 3.930916  | 3.747602  | 1.662395  |
| C | 4.029002  | 2.172544  | 5.293667  |
| H | 5.107241  | 2.034068  | 5.127208  |
| H | 3.819637  | 3.248775  | 5.318706  |
| H | 3.791798  | 1.763668  | 6.285335  |
| C | 3.364148  | -0.041519 | 4.383415  |
| H | 2.918206  | -0.358746 | 5.335846  |
| H | 2.845441  | -0.579533 | 3.578781  |
| H | 4.420527  | -0.341035 | 4.388969  |

170

Figure\_S7\_imid-3\_modeB\_ts(AS)\_04 / electronic energy: -4442.733754884031 a.u. / lowest freq: -260.24 cm-1

|    |           |           |           |
|----|-----------|-----------|-----------|
| C  | -0.625581 | 3.110783  | -1.715104 |
| H  | -1.244662 | 2.947288  | -2.610244 |
| C  | 0.675620  | 2.281249  | -1.743852 |
| H  | 1.539657  | 2.805795  | -1.300674 |
| C  | -0.762555 | 1.393737  | -0.109571 |
| C  | -2.699798 | 2.853929  | -0.241475 |
| C  | -2.946231 | 3.825986  | 0.732590  |
| C  | -3.796002 | 2.236813  | -0.879180 |
| C  | -4.245406 | 4.147100  | 1.119384  |
| H  | -2.102413 | 4.335031  | 1.199312  |
| C  | -5.094343 | 2.569400  | -0.489944 |
| C  | -5.322922 | 3.506178  | 0.515480  |
| H  | -4.408178 | 4.901127  | 1.892137  |
| H  | -5.926685 | 2.082825  | -0.999882 |
| H  | -6.346762 | 3.745394  | 0.812021  |
| S  | -3.615558 | 1.059436  | -2.237826 |
| O  | -5.012573 | 0.727507  | -2.649141 |
| O  | -2.946864 | -0.145566 | -1.668587 |
| O  | -2.841310 | 1.755143  | -3.280857 |
| Cu | -1.095242 | 0.756852  | 1.738064  |
| C  | -0.390296 | 4.586005  | -1.517028 |
| C  | -0.788824 | 5.502383  | -2.505889 |
| C  | 0.223474  | 5.068344  | -0.348039 |
| C  | -0.575140 | 6.872604  | -2.326627 |
| H  | -1.262389 | 5.158206  | -3.416919 |
| C  | 0.434547  | 6.438142  | -0.171399 |
| H  | 0.530272  | 4.384046  | 0.427786  |
| C  | 0.036026  | 7.340162  | -1.160474 |
| H  | -0.883599 | 7.572315  | -3.092569 |
| H  | 0.906257  | 6.799903  | 0.733082  |
| H  | 0.200074  | 8.401100  | -1.023198 |
| N  | -1.351408 | 2.512595  | -0.573706 |
| N  | 0.334535  | 1.153809  | -0.840129 |
| C  | -1.522047 | -0.442841 | 3.299385  |
| C  | -0.334570 | -0.827532 | 4.066085  |
| C  | -0.318606 | -0.712003 | 5.466029  |
| C  | 0.817862  | -1.327481 | 3.431221  |
| C  | 0.791886  | -1.113827 | 6.205531  |
| C  | 1.919586  | -1.739756 | 4.170010  |
| C  | 1.911528  | -1.640565 | 5.562785  |
| H  | 0.777856  | -1.022853 | 7.294220  |
| H  | 2.798075  | -2.135756 | 3.657239  |
| H  | 2.780327  | -1.961524 | 6.141943  |
| C  | -1.898766 | -1.099894 | 2.090964  |

|    |           |           |           |
|----|-----------|-----------|-----------|
| C  | -3.081320 | -0.769095 | 1.399375  |
| H  | -3.619190 | 0.137037  | 1.698402  |
| H  | -3.144605 | -1.008528 | 0.337719  |
| H  | 0.847940  | -1.376826 | 2.338367  |
| H  | -1.290546 | -1.919017 | 1.699519  |
| P  | -5.344969 | -2.399719 | 0.809831  |
| O  | -6.172946 | -1.113868 | 0.192785  |
| O  | -4.729219 | -3.032072 | -0.404830 |
| O  | -6.478941 | -3.307922 | 1.528004  |
| O  | -4.487869 | -1.918321 | 1.992997  |
| Na | -4.937143 | -1.573742 | -2.135773 |
| H  | -2.308431 | 0.077675  | 3.861429  |
| H  | -1.202004 | -0.319002 | 5.977153  |
| C  | -6.875328 | -0.252603 | 1.073714  |
| H  | -7.409347 | 0.486541  | 0.465696  |
| H  | -7.607575 | -0.810381 | 1.677320  |
| H  | -6.189511 | 0.274010  | 1.754459  |
| C  | -7.424916 | -3.985433 | 0.714083  |
| H  | -7.996877 | -4.657493 | 1.362832  |
| H  | -8.121187 | -3.278228 | 0.236782  |
| H  | -6.928773 | -4.577868 | -0.067645 |
| C  | 1.097557  | -0.040416 | -0.695609 |
| C  | 2.501950  | -0.022106 | -0.791134 |
| C  | 0.438750  | -1.282631 | -0.618475 |
| C  | 3.231041  | -1.224992 | -0.825145 |
| C  | 1.157659  | -2.486471 | -0.688861 |
| C  | 2.552198  | -2.449860 | -0.786882 |
| H  | 3.105456  | -3.375528 | -0.892423 |
| H  | -0.642621 | -1.315672 | -0.614119 |
| H  | 3.025319  | 0.919082  | -0.890544 |
| C  | 0.442011  | -3.776697 | -0.859987 |
| C  | 0.402955  | -4.740135 | 0.192990  |
| C  | -0.174590 | -4.078396 | -2.112037 |
| C  | -0.296692 | -5.944556 | -0.011136 |
| C  | -0.866813 | -5.294635 | -2.257170 |
| C  | -0.932982 | -6.209340 | -1.215803 |
| H  | -0.342155 | -6.697816 | 0.764035  |
| H  | -1.349454 | -5.549470 | -3.191399 |
| H  | -1.464151 | -7.142841 | -1.351225 |
| C  | 4.700033  | -1.224526 | -1.033516 |
| C  | 5.229258  | -1.050248 | -2.346495 |
| C  | 5.578802  | -1.551195 | 0.042792  |
| C  | 6.614905  | -1.198652 | -2.548040 |
| C  | 6.954237  | -1.694406 | -0.217913 |
| C  | 7.463520  | -1.510418 | -1.495293 |
| H  | 7.046940  | -1.101565 | -3.534858 |
| H  | 7.643082  | -1.971582 | 0.568445  |
| H  | 8.524018  | -1.632210 | -1.675525 |
| C  | 5.072741  | -1.821770 | 1.457896  |
| H  | 4.011409  | -1.512633 | 1.555837  |
| C  | 5.854021  | -1.024618 | 2.513366  |
| H  | 5.943079  | 0.038146  | 2.211086  |
| H  | 5.327556  | -1.078971 | 3.489681  |
| H  | 6.876263  | -1.431426 | 2.660092  |
| C  | 5.145243  | -3.319966 | 1.768743  |
| H  | 4.600333  | -3.893663 | 0.993538  |
| H  | 6.198391  | -3.672861 | 1.788920  |
| H  | 4.682107  | -3.529843 | 2.755828  |
| C  | 4.340958  | -0.781584 | -3.561579 |
| H  | 3.284071  | -0.629968 | -3.266241 |
| C  | 4.344596  | -1.983123 | -4.513712 |
| H  | 3.617270  | -1.818261 | -5.337587 |
| H  | 5.350749  | -2.142503 | -4.955850 |
| H  | 4.041965  | -2.901024 | -3.965469 |
| C  | 4.765679  | 0.499824  | -4.290917 |
| H  | 4.120415  | 0.661501  | -5.176524 |
| H  | 4.664789  | 1.373200  | -3.611673 |
| H  | 5.812140  | 0.443659  | -4.653486 |
| C  | -0.079003 | -3.148646 | -3.323252 |
| H  | 0.493280  | -2.231998 | -3.085407 |
| C  | 1.131130  | -4.543241 | 1.520668  |
| H  | 1.602482  | -3.542133 | 1.566320  |
| C  | 0.169263  | -4.633822 | 2.715192  |
| H  | -0.686376 | -3.944053 | 2.578668  |
| H  | -0.226987 | -5.662724 | 2.842464  |
| H  | 0.698405  | -4.353796 | 3.650427  |
| C  | 2.261364  | -5.569449 | 1.669801  |
| H  | 1.858686  | -6.598620 | 1.779541  |
| H  | 2.920216  | -5.545259 | 0.776521  |
| H  | 2.871540  | -5.335470 | 2.567832  |
| C  | -1.471087 | -2.690343 | -3.774351 |
| H  | -2.066545 | -3.536189 | -4.176873 |
| H  | -2.015595 | -2.247577 | -2.916364 |
| H  | -1.384760 | -1.919457 | -4.567426 |
| C  | 0.681586  | -3.815850 | -4.475600 |
| H  | 1.681311  | -4.150831 | -4.125236 |
| H  | 0.127469  | -4.691980 | -4.873160 |
| H  | 0.831084  | -3.089091 | -5.302798 |

|   |           |           |           |
|---|-----------|-----------|-----------|
| H | -0.282912 | 0.137486  | -3.214204 |
| H | 0.183092  | -0.382930 | -5.578529 |
| C | 0.399461  | 0.765734  | -3.768716 |
| C | 0.644838  | 0.477720  | -5.114512 |
| C | 1.009361  | 1.876690  | -3.157004 |
| C | 1.465651  | 1.315496  | -5.871753 |
| H | 1.644833  | 1.097449  | -6.916518 |
| C | 1.834352  | 2.712171  | -3.929176 |
| C | 2.052961  | 2.436931  | -5.281572 |
| H | 2.287080  | 3.592704  | -3.490124 |
| H | 2.684657  | 3.089073  | -5.870559 |
| C | -0.517171 | 2.403170  | 2.771662  |
| H | -0.831138 | 3.099832  | 1.981300  |
| C | -1.284744 | 2.649853  | 4.051129  |
| H | -2.378767 | 2.583559  | 3.921404  |
| H | -1.011217 | 1.933934  | 4.842807  |
| H | -1.084713 | 3.651121  | 4.476774  |
| B | 1.010030  | 2.489975  | 2.856637  |
| O | 1.702181  | 2.669882  | 4.038804  |
| O | 1.861791  | 2.517135  | 1.760160  |
| C | 3.125065  | 3.047651  | 2.209015  |
| C | 3.112903  | 2.704361  | 3.738781  |
| C | 4.238989  | 2.390649  | 1.423209  |
| H | 4.128269  | 1.300791  | 1.416009  |
| H | 4.225928  | 2.734393  | 0.379837  |
| H | 5.225016  | 2.640043  | 1.840651  |
| C | 3.115280  | 4.546662  | 1.947417  |
| H | 2.300603  | 5.048024  | 2.488705  |
| H | 4.062869  | 5.018224  | 2.242415  |
| H | 2.973214  | 4.732302  | 0.874379  |
| C | 3.776498  | 3.741058  | 4.621063  |
| H | 4.835326  | 3.866987  | 4.351408  |
| H | 3.284201  | 4.718392  | 4.548246  |
| H | 3.737026  | 3.424369  | 5.672241  |
| C | 3.676394  | 1.328391  | 4.035049  |
| H | 3.418036  | 1.039202  | 5.062769  |
| H | 3.258720  | 0.567365  | 3.362103  |
| H | 4.770969  | 1.319193  | 3.946807  |

170

Figure\_S7\_imid-3\_modeB\_ts(AS)\_05 / electronic energy: -4442.733814647407 a.u. / lowest freq: -253.79 cm-1

|    |           |           |           |
|----|-----------|-----------|-----------|
| C  | -0.581307 | 3.012188  | -1.327166 |
| H  | -1.184238 | 2.629765  | -2.162777 |
| C  | 0.803477  | 2.374757  | -1.228216 |
| H  | 1.462630  | 3.005008  | -0.604822 |
| C  | -0.580688 | 1.363344  | 0.338616  |
| C  | -2.438856 | 2.854098  | 0.517766  |
| C  | -2.420656 | 3.113174  | 1.893690  |
| C  | -3.666309 | 2.874677  | -0.170131 |
| C  | -3.598048 | 3.364951  | 2.591939  |
| H  | -1.449654 | 3.141354  | 2.392323  |
| C  | -4.838381 | 3.151474  | 0.538495  |
| C  | -4.812923 | 3.387430  | 1.911034  |
| H  | -3.559023 | 3.558316  | 3.666175  |
| H  | -5.782524 | 3.148200  | -0.008288 |
| H  | -5.744271 | 3.588403  | 2.444283  |
| S  | -3.823692 | 2.491152  | -1.919432 |
| O  | -5.280752 | 2.275265  | -2.151779 |
| O  | -3.070810 | 1.209292  | -2.109247 |
| O  | -3.264268 | 3.640952  | -2.650033 |
| Cu | -0.995000 | 0.414040  | 2.034069  |
| C  | -0.517307 | 4.515799  | -1.423019 |
| C  | -0.358542 | 5.105706  | -2.689687 |
| C  | -0.576395 | 5.347962  | -0.289514 |
| C  | -0.287213 | 6.495058  | -2.822572 |
| H  | -0.293659 | 4.487290  | -3.576599 |
| C  | -0.509628 | 6.737543  | -0.427477 |
| H  | -0.654598 | 4.933099  | 0.703416  |
| C  | -0.366736 | 7.310876  | -1.692410 |
| H  | -0.169895 | 6.939038  | -3.802609 |
| H  | -0.559051 | 7.370201  | 0.449300  |
| H  | -0.311312 | 8.386752  | -1.796110 |
| N  | -1.196306 | 2.488947  | -0.072654 |
| N  | 0.500804  | 1.168802  | -0.428739 |
| C  | -2.153603 | -0.934407 | 3.083263  |
| C  | -1.468828 | -1.861499 | 3.980878  |
| C  | -1.921148 | -2.026990 | 5.301048  |
| C  | -0.321284 | -2.565820 | 3.579973  |
| C  | -1.259060 | -2.877848 | 6.181857  |
| C  | 0.342239  | -3.412653 | 4.459280  |
| C  | -0.124791 | -3.575828 | 5.765128  |
| H  | -1.628715 | -2.994769 | 7.203454  |
| H  | 1.237912  | -3.943596 | 4.129172  |
| H  | 0.400262  | -4.237636 | 6.457504  |
| C  | -2.303037 | -1.141181 | 1.686240  |
| C  | -3.173802 | -0.353841 | 0.907555  |
| H  | -3.644022 | 0.516618  | 1.369654  |
| H  | -3.048135 | -0.286917 | -0.174952 |
| H  | 0.079298  | -2.394731 | 2.576611  |

|    |           |           |           |
|----|-----------|-----------|-----------|
| H  | -1.793018 | -1.981018 | 1.202183  |
| P  | -5.075984 | -2.273504 | -0.307678 |
| O  | -6.367898 | -3.197861 | 0.046790  |
| O  | -5.216465 | -1.856207 | -1.743385 |
| O  | -3.806897 | -3.286939 | -0.116260 |
| O  | -4.916384 | -1.238261 | 0.816205  |
| Na | -5.090862 | 0.030709  | -2.866917 |
| H  | -2.901141 | -0.284599 | 3.560351  |
| H  | -2.804429 | -1.474924 | 5.633846  |
| C  | -6.467037 | -3.778500 | 1.336320  |
| H  | -7.418564 | -4.320058 | 1.384231  |
| H  | -5.645583 | -4.488325 | 1.521265  |
| H  | -6.451059 | -3.011771 | 2.124290  |
| C  | -3.627063 | -4.305453 | -1.083473 |
| H  | -3.002100 | -5.086404 | -0.636532 |
| H  | -4.583548 | -4.761879 | -1.381494 |
| H  | -3.131303 | -3.917644 | -1.985822 |
| C  | 1.140756  | -0.090548 | -0.530394 |
| C  | 2.527590  | -0.186770 | -0.374633 |
| C  | 0.403805  | -1.238681 | -0.881617 |
| C  | 3.175650  | -1.413921 | -0.546493 |
| C  | 1.060851  | -2.459711 | -1.118174 |
| C  | 2.445921  | -2.542269 | -0.933170 |
| H  | 2.961612  | -3.477001 | -1.119213 |
| H  | -0.663489 | -1.162845 | -1.049984 |
| H  | 3.105026  | 0.688318  | -0.125590 |
| C  | 0.335467  | -3.630731 | -1.672535 |
| C  | 0.149214  | -4.804262 | -0.882959 |
| C  | -0.075023 | -3.631501 | -3.039445 |
| C  | -0.416572 | -5.946614 | -1.480548 |
| C  | -0.686919 | -4.783078 | -3.568765 |
| C  | -0.842549 | -5.927990 | -2.800908 |
| H  | -0.544337 | -6.862192 | -0.918938 |
| H  | -1.024886 | -4.809250 | -4.596182 |
| H  | -1.294239 | -6.811028 | -3.234483 |
| C  | 4.634693  | -1.516315 | -0.359852 |
| C  | 5.499078  | -1.452967 | -1.488335 |
| C  | 5.168465  | -1.755188 | 0.937763  |
| C  | 6.876736  | -1.667465 | -1.299646 |
| C  | 6.555224  | -1.949740 | 1.074442  |
| C  | 7.395547  | -1.909384 | -0.032559 |
| H  | 7.559537  | -1.652874 | -2.138673 |
| H  | 6.993283  | -2.148618 | 2.043541  |
| H  | 8.458662  | -2.070745 | 0.092218  |
| C  | 4.282055  | -1.839146 | 2.181669  |
| H  | 3.223888  | -1.615089 | 1.937127  |
| C  | 4.698462  | -0.805519 | 3.236596  |
| H  | 4.712575  | 0.209400  | 2.788340  |
| H  | 3.971734  | -0.804112 | 4.076455  |
| H  | 5.704054  | -1.028767 | 3.649932  |
| C  | 4.294436  | -3.256058 | 2.765561  |
| H  | 3.961266  | -3.984446 | 1.995765  |
| H  | 5.310143  | -3.539233 | 3.113589  |
| H  | 3.597720  | -3.318289 | 3.627867  |
| C  | 4.975418  | -1.177522 | -2.898719 |
| H  | 3.892478  | -0.936031 | -2.883875 |
| C  | 5.131691  | -2.414633 | -3.789405 |
| H  | 4.676428  | -2.226674 | -4.785411 |
| H  | 6.202376  | -2.673211 | -3.931494 |
| H  | 4.609741  | -3.280901 | -3.329290 |
| C  | 5.663697  | 0.042350  | -3.524911 |
| H  | 5.198637  | 0.277160  | -4.505477 |
| H  | 5.547243  | 0.925595  | -2.861048 |
| H  | 6.744852  | -0.140697 | -3.695260 |
| C  | 0.157911  | -2.442974 | -3.970907 |
| H  | 0.703083  | -1.629892 | -3.456948 |
| C  | 0.542531  | -4.873354 | 0.590794  |
| H  | 0.906858  | -3.890090 | 0.948255  |
| C  | -0.664178 | -5.232761 | 1.471190  |
| H  | -1.459881 | -4.467264 | 1.357267  |
| H  | -1.083141 | -6.226471 | 1.211859  |
| H  | -0.363164 | -5.269827 | 2.537182  |
| C  | 1.688817  | -5.868547 | 0.807018  |
| H  | 1.370868  | -6.905566 | 0.569170  |
| H  | 2.553244  | -5.601847 | 0.162889  |
| H  | 2.024416  | -5.836874 | 1.865753  |
| C  | -1.177616 | -1.850375 | -4.438256 |
| H  | -1.754470 | -2.581367 | -5.042632 |
| H  | -1.786628 | -1.552513 | -3.557982 |
| H  | -1.002935 | -0.947737 | -5.059563 |
| C  | 1.042257  | -2.835313 | -5.162659 |
| H  | 1.991177  | -3.284190 | -4.798041 |
| H  | 0.531049  | -3.562284 | -5.827571 |
| H  | 1.296185  | -1.937155 | -5.763372 |
| H  | -0.115494 | 0.805524  | -3.297806 |
| H  | 0.936003  | 0.464760  | -5.505764 |
| C  | 0.830295  | 1.283439  | -3.516764 |
| C  | 1.424491  | 1.082959  | -4.766127 |

|   |           |           |           |
|---|-----------|-----------|-----------|
| C | 1.451640  | 2.105193  | -2.559975 |
| C | 2.644465  | 1.690442  | -5.068294 |
| H | 3.102739  | 1.532539  | -6.035909 |
| C | 2.682603  | 2.708370  | -2.872792 |
| C | 3.272614  | 2.502946  | -4.122428 |
| H | 3.182359  | 3.346725  | -2.154862 |
| H | 4.218526  | 2.973453  | -4.357359 |
| C | 0.218022  | 1.248911  | 3.456384  |
| H | -0.582655 | 1.832385  | 3.951212  |
| C | 0.851445  | 0.287152  | 4.445277  |
| H | 0.124476  | -0.232511 | 5.083211  |
| H | 1.454493  | -0.493435 | 3.952980  |
| H | 1.551769  | 0.804791  | 5.126043  |
| B | 1.250763  | 2.244038  | 2.889209  |
| O | 2.613779  | 2.059705  | 3.039256  |
| O | 0.978272  | 3.499849  | 2.353713  |
| C | 2.143857  | 4.315291  | 2.623060  |
| C | 3.298705  | 3.257563  | 2.623318  |
| C | 2.285681  | 5.395177  | 1.574655  |
| H | 2.250607  | 4.995208  | 0.553642  |
| H | 1.484309  | 6.138030  | 1.677875  |
| H | 3.240078  | 5.927059  | 1.697510  |
| C | 1.930083  | 4.941346  | 3.994069  |
| H | 1.850034  | 4.173690  | 4.777493  |
| H | 2.744999  | 5.625979  | 4.266496  |
| H | 0.993333  | 5.514690  | 3.990651  |
| C | 4.411882  | 3.543032  | 3.610819  |
| H | 4.889385  | 4.510956  | 3.399776  |
| H | 4.049622  | 3.554946  | 4.645628  |
| H | 5.186688  | 2.767815  | 3.538570  |
| C | 3.883110  | 3.036003  | 1.240625  |
| H | 4.524929  | 2.145606  | 1.241550  |
| H | 3.094116  | 2.894199  | 0.492506  |
| H | 4.495563  | 3.889660  | 0.919771  |

170

Figure\_S7\_imid-3\_modeB\_ts(AS)\_06 / electronic energy: -4442.733814797944 a.u. / lowest freq: -253.80 cm-1

|    |           |           |           |
|----|-----------|-----------|-----------|
| C  | -0.581208 | 3.012221  | -1.327143 |
| H  | -1.184157 | 2.629824  | -2.162755 |
| C  | 0.803556  | 2.374747  | -1.228204 |
| H  | 1.462729  | 3.004971  | -0.604803 |
| C  | -0.580635 | 1.363360  | 0.338622  |
| C  | -2.438747 | 2.854182  | 0.517800  |
| C  | -2.420524 | 3.113262  | 1.893724  |
| C  | -3.666206 | 2.874801  | -0.170085 |
| C  | -3.597901 | 3.365080  | 2.591983  |
| H  | -1.449517 | 3.141409  | 2.392349  |
| C  | -4.838262 | 3.151637  | 0.538553  |
| C  | -4.812782 | 3.387596  | 1.911091  |
| H  | -3.558859 | 3.558447  | 3.666219  |
| H  | -5.782411 | 3.148393  | -0.008222 |
| H  | -5.744118 | 3.588602  | 2.444348  |
| S  | -3.823618 | 2.491285  | -1.919386 |
| O  | -5.280687 | 2.275451  | -2.151720 |
| O  | -3.070782 | 1.209399  | -2.109211 |
| O  | -3.264161 | 3.641068  | -2.649989 |
| Cu | -0.994971 | 0.414050  | 2.034065  |
| C  | -0.517160 | 4.515831  | -1.422983 |
| C  | -0.358398 | 5.105746  | -2.689648 |
| C  | -0.576199 | 5.347984  | -0.289469 |
| C  | -0.287023 | 6.495096  | -2.822521 |
| H  | -0.293550 | 4.487336  | -3.576568 |
| C  | -0.509386 | 6.737565  | -0.427419 |
| H  | -0.654398 | 4.933114  | 0.703458  |
| C  | -0.366497 | 7.310905  | -1.692349 |
| H  | -0.169707 | 6.939083  | -3.802556 |
| H  | -0.558771 | 7.370216  | 0.449365  |
| H  | -0.311037 | 8.386781  | -1.796039 |
| N  | -1.196215 | 2.488990  | -0.072631 |
| N  | 0.500848  | 1.168791  | -0.428740 |
| C  | -2.153613 | -0.934370 | 3.083251  |
| C  | -1.468884 | -1.861492 | 3.980872  |
| C  | -1.921235 | -2.026965 | 5.301033  |
| C  | -0.321363 | -2.565862 | 3.579987  |
| C  | -1.259200 | -2.877852 | 6.181854  |
| C  | 0.342108  | -3.412723 | 4.459307  |
| C  | -0.124953 | -3.575879 | 5.765147  |
| H  | -1.628881 | -2.994758 | 7.203445  |
| H  | 1.237762  | -3.943706 | 4.129215  |
| H  | 0.400059  | -4.237710 | 6.457532  |
| C  | -2.303054 | -1.141131 | 1.686229  |
| C  | -3.173796 | -0.353758 | 0.907552  |
| H  | -3.643988 | 0.516712  | 1.369657  |
| H  | -3.048132 | -0.286833 | -0.174956 |
| H  | 0.079244  | -2.394795 | 2.576632  |
| H  | -1.793065 | -1.980981 | 1.202162  |
| P  | -5.076078 | -2.273348 | -0.307671 |
| O  | -6.367997 | -3.197682 | 0.046836  |
| O  | -5.216610 | -1.856027 | -1.743365 |

|    |           |           |           |
|----|-----------|-----------|-----------|
| O  | -3.807003 | -3.286814 | -0.116327 |
| O  | -4.916402 | -1.238130 | 0.816224  |
| Na | -5.090898 | 0.030879  | -2.866895 |
| H  | -2.901130 | -0.284536 | 3.560338  |
| H  | -2.804499 | -1.474863 | 5.633815  |
| C  | -6.467113 | -3.778312 | 1.336374  |
| H  | -7.418622 | -4.319902 | 1.384291  |
| H  | -5.645636 | -4.488108 | 1.521325  |
| H  | -6.451159 | -3.011573 | 2.124334  |
| C  | -3.627244 | -4.305329 | -1.083553 |
| H  | -3.002290 | -5.086304 | -0.636642 |
| H  | -4.583757 | -4.761720 | -1.381537 |
| H  | -3.131507 | -3.917532 | -1.985919 |
| C  | 1.140759  | -0.090577 | -0.530411 |
| C  | 2.527590  | -0.186848 | -0.374654 |
| C  | 0.403768  | -1.238681 | -0.881647 |
| C  | 3.175608  | -1.414019 | -0.546529 |
| C  | 1.060773  | -2.459730 | -1.118220 |
| C  | 2.445840  | -2.542338 | -0.933218 |
| H  | 2.961499  | -3.477085 | -1.119272 |
| H  | -0.663523 | -1.162807 | -1.050012 |
| H  | 3.105056  | 0.688218  | -0.125603 |
| C  | 0.335347  | -3.630717 | -1.672594 |
| C  | 0.149045  | -4.804248 | -0.883028 |
| C  | -0.075141 | -3.631458 | -3.039504 |
| C  | -0.416788 | -5.946571 | -1.480627 |
| C  | -0.687085 | -4.783005 | -3.568834 |
| C  | -0.842763 | -5.927917 | -2.800987 |
| H  | -0.544593 | -6.862147 | -0.919024 |
| H  | -1.025054 | -4.809153 | -4.596252 |
| H  | -1.294490 | -6.810933 | -3.234570 |
| C  | 4.634647  | -1.516466 | -0.359886 |
| C  | 5.499038  | -1.453123 | -1.488365 |
| C  | 5.168407  | -1.755383 | 0.937726  |
| C  | 6.876688  | -1.667669 | -1.299676 |
| C  | 6.555159  | -1.949981 | 1.074405  |
| C  | 7.395487  | -1.909629 | -0.032592 |
| H  | 7.559492  | -1.653083 | -2.138700 |
| H  | 6.993209  | -2.148892 | 2.043502  |
| H  | 8.458597  | -2.071026 | 0.092185  |
| C  | 4.281991  | -1.839337 | 2.181627  |
| H  | 3.223832  | -1.615239 | 1.937087  |
| C  | 4.698430  | -0.805744 | 3.236576  |
| H  | 4.712601  | 0.209180  | 2.788334  |
| H  | 3.971686  | -0.804313 | 4.076421  |
| H  | 5.704003  | -1.029049 | 3.649927  |
| C  | 4.294323  | -3.256261 | 2.765490  |
| H  | 3.961142  | -3.984624 | 1.995676  |
| H  | 5.310017  | -3.539473 | 3.113526  |
| C  | 3.597594  | -3.318489 | 3.627787  |
| C  | 4.975391  | -1.177635 | -2.898745 |
| H  | 3.892458  | -0.936112 | -2.883901 |
| C  | 5.131631  | -2.414733 | -3.789454 |
| H  | 4.676358  | -2.226749 | -4.785451 |
| H  | 6.202309  | -2.673326 | -3.931563 |
| H  | 4.609672  | -3.281001 | -3.329348 |
| C  | 5.663708  | 0.042228  | -3.524911 |
| H  | 5.198657  | 0.277072  | -4.505473 |
| H  | 5.547279  | 0.925463  | -2.861030 |
| H  | 6.744858  | -0.140848 | -3.695261 |
| C  | 0.157841  | -2.442931 | -3.970954 |
| H  | 0.703041  | -1.629874 | -3.456986 |
| C  | 0.542359  | -4.873369 | 0.590724  |
| H  | 0.906723  | -3.890121 | 0.948195  |
| C  | -0.664363 | -5.232741 | 1.471115  |
| H  | -1.460057 | -4.467238 | 1.357168  |
| H  | -1.083332 | -6.226453 | 1.211804  |
| H  | -0.363359 | -5.269785 | 2.537111  |
| C  | 1.688609  | -5.868606 | 0.806939  |
| H  | 1.370628  | -6.905609 | 0.569062  |
| H  | 2.553052  | -5.601920 | 0.162826  |
| H  | 2.024196  | -5.836969 | 1.865678  |
| C  | -1.177662 | -1.850279 | -4.438304 |
| H  | -1.754520 | -2.581230 | -5.042726 |
| H  | -1.786686 | -1.552441 | -3.558029 |
| H  | -1.002947 | -0.947616 | -5.059565 |
| C  | 1.042177  | -2.835292 | -5.162706 |
| H  | 1.991090  | -3.284184 | -4.798087 |
| H  | 0.530956  | -3.562258 | -5.827613 |
| H  | 1.296119  | -1.937142 | -5.763424 |
| H  | -0.115461 | 0.805563  | -3.297811 |
| H  | 0.936028  | 0.464793  | -5.505774 |
| C  | 0.830342  | 1.283454  | -3.516765 |
| C  | 1.424532  | 1.082972  | -4.766130 |
| C  | 1.451710  | 2.105181  | -2.559967 |
| C  | 2.644522  | 1.690425  | -5.068291 |
| H  | 3.102793  | 1.532520  | -6.035907 |
| C  | 2.682688  | 2.708329  | -2.872779 |

|   |           |           |           |
|---|-----------|-----------|-----------|
| C | 3.272693  | 2.502903  | -4.122417 |
| H | 3.182461  | 3.346663  | -2.154841 |
| H | 4.218617  | 2.973388  | -4.357343 |
| C | 0.218056  | 1.248876  | 3.456403  |
| H | -0.582614 | 1.832371  | 3.951217  |
| C | 0.851431  | 0.287088  | 4.445298  |
| H | 0.124435  | -0.232541 | 5.083228  |
| H | 1.454442  | -0.493528 | 3.953002  |
| H | 1.551779  | 0.804693  | 5.126065  |
| B | 1.250836  | 2.243970  | 2.889242  |
| O | 2.613843  | 2.059583  | 3.039290  |
| O | 0.978394  | 3.499796  | 2.353757  |
| C | 2.144011  | 4.315190  | 2.623112  |
| C | 3.298817  | 3.257417  | 2.623364  |
| C | 2.285881  | 5.395078  | 1.574715  |
| H | 2.250803  | 4.995116  | 0.553699  |
| H | 1.484534  | 6.137958  | 1.677932  |
| H | 3.240296  | 5.926927  | 1.697581  |
| C | 1.930260  | 4.941244  | 3.994125  |
| H | 1.850191  | 4.173587  | 4.777545  |
| H | 2.745196  | 5.625852  | 4.266552  |
| H | 0.993526  | 5.514615  | 3.990713  |
| C | 4.412003  | 3.542837  | 3.610869  |
| H | 4.889534  | 4.510751  | 3.399841  |
| H | 4.049745  | 3.554745  | 4.645679  |
| H | 5.186788  | 2.767599  | 3.538608  |
| C | 3.883217  | 3.035844  | 1.240670  |
| H | 4.525000  | 2.145423  | 1.241589  |
| H | 3.094218  | 2.894077  | 0.492549  |
| H | 4.495703  | 3.889481  | 0.919825  |

170

Figure\_S7\_imid-3\_modeB\_prod(AS) / electronic energy: -4442.752883316609 a.u. / lowest freq: 17.14 cm<sup>-1</sup>

|    |           |           |           |
|----|-----------|-----------|-----------|
| C  | 0.946510  | 1.453452  | -3.161651 |
| H  | 0.824460  | 2.524999  | -2.949017 |
| C  | -0.364991 | 0.668356  | -3.040037 |
| H  | -0.345694 | -0.261604 | -3.636690 |
| C  | 0.932930  | 0.262046  | -1.152502 |
| C  | 3.098912  | 1.118446  | -1.734780 |
| C  | 3.953961  | 0.016530  | -1.679297 |
| C  | 3.586788  | 2.398291  | -1.417665 |
| C  | 5.290582  | 0.174864  | -1.323933 |
| H  | 3.566587  | -0.972939 | -1.929856 |
| C  | 4.931435  | 2.544120  | -1.071859 |
| C  | 5.783174  | 1.442551  | -1.025954 |
| H  | 5.941276  | -0.700749 | -1.299203 |
| H  | 5.290219  | 3.541880  | -0.813880 |
| H  | 6.831119  | 1.578177  | -0.750857 |
| S  | 2.547964  | 3.868600  | -1.387131 |
| O  | 3.328314  | 4.879982  | -0.619649 |
| O  | 1.316736  | 3.465901  | -0.643330 |
| O  | 2.320001  | 4.231891  | -2.797510 |
| Cu | 1.604519  | -0.722351 | 0.407606  |
| C  | 1.625638  | 1.275965  | -4.494743 |
| C  | 1.704298  | 2.355205  | -5.392900 |
| C  | 2.172204  | 0.035686  | -4.871870 |
| C  | 2.332014  | 2.200581  | -6.632466 |
| H  | 1.272053  | 3.314869  | -5.140237 |
| C  | 2.800186  | -0.114474 | -6.111394 |
| H  | 2.115738  | -0.813173 | -4.207597 |
| C  | 2.882004  | 0.967658  | -6.990428 |
| H  | 2.389347  | 3.036864  | -7.317154 |
| H  | 3.222419  | -1.071046 | -6.390871 |
| H  | 3.367645  | 0.849770  | -7.950448 |
| N  | 1.730226  | 0.862962  | -2.041870 |
| N  | -0.321375 | 0.283753  | -1.612323 |
| C  | 2.112776  | -1.209725 | 2.396911  |
| C  | 1.594943  | -2.429228 | 3.015294  |
| C  | 2.429524  | -3.244474 | 3.796681  |
| C  | 0.262209  | -2.830260 | 2.820674  |
| C  | 1.940951  | -4.407462 | 4.382325  |
| C  | -0.222848 | -4.001441 | 3.391808  |
| C  | 0.614109  | -4.791537 | 4.181213  |
| H  | 2.602540  | -5.025899 | 4.993365  |
| H  | -1.259907 | -4.298644 | 3.224179  |
| H  | 0.234118  | -5.711887 | 4.630236  |
| C  | 1.375454  | 0.005282  | 2.347439  |
| C  | 1.796362  | 1.081856  | 1.581385  |
| H  | 2.845730  | 1.183147  | 1.275199  |
| H  | 1.171874  | 1.959199  | 1.427608  |
| H  | -0.384969 | -2.230242 | 2.173099  |
| H  | 0.350690  | 0.016023  | 2.738599  |
| P  | 1.205722  | 4.030926  | 3.649744  |
| O  | 1.525308  | 4.468356  | 5.202442  |
| O  | 0.346758  | 5.121772  | 3.057717  |
| O  | 0.334003  | 2.645759  | 3.870081  |
| O  | 2.462233  | 3.625575  | 2.914067  |
| Na | 1.785062  | 5.158183  | 1.134510  |
| H  | 3.204701  | -1.139280 | 2.297404  |

|   |           |           |           |
|---|-----------|-----------|-----------|
| H | 3.474736  | -2.958501 | 3.935875  |
| C | 2.351828  | 3.620076  | 5.970558  |
| H | 2.517337  | 4.096605  | 6.944879  |
| H | 1.882499  | 2.636030  | 6.137891  |
| H | 3.327279  | 3.455719  | 5.486188  |
| C | -0.924461 | 2.762708  | 4.494758  |
| H | -1.379292 | 1.765851  | 4.525714  |
| H | -0.837022 | 3.133905  | 5.529111  |
| H | -1.588977 | 3.444963  | 3.942997  |
| C | -1.424805 | -0.206384 | -0.873478 |
| C | -2.281163 | -1.160339 | -1.437609 |
| C | -1.750901 | 0.365368  | 0.369183  |
| C | -3.443990 | -1.549669 | -0.766102 |
| C | -2.959306 | 0.034880  | 1.008516  |
| C | -3.792109 | -0.938244 | 0.442465  |
| H | -4.728134 | -1.195954 | 0.922993  |
| H | -1.120622 | 1.140877  | 0.784343  |
| H | -2.048745 | -1.597076 | -2.401070 |
| C | -3.433205 | 0.792903  | 2.194637  |
| C | -3.581391 | 0.142841  | 3.457024  |
| C | -3.843494 | 2.153677  | 2.052342  |
| C | -4.156512 | 0.853938  | 4.527464  |
| C | -4.360030 | 2.831487  | 3.172429  |
| C | -4.526268 | 2.183851  | 4.387977  |
| H | -4.310502 | 0.382596  | 5.488801  |
| H | -4.658589 | 3.869033  | 3.103976  |
| H | -4.946214 | 2.718068  | 5.230613  |
| C | -4.322270 | -2.579352 | -1.349843 |
| C | -5.500654 | -2.195745 | -2.049341 |
| C | -3.997483 | -3.956279 | -1.194834 |
| C | -6.345499 | -3.200582 | -2.555022 |
| C | -4.860466 | -4.921547 | -1.745261 |
| C | -6.023402 | -4.545564 | -2.408887 |
| H | -7.259360 | -2.945051 | -3.074860 |
| H | -4.639728 | -5.976897 | -1.654317 |
| H | -6.680695 | -5.303775 | -2.814956 |
| C | -2.746493 | -4.419686 | -0.444865 |
| H | -2.175578 | -3.559307 | -0.040466 |
| C | -1.787191 | -5.163262 | -1.381558 |
| H | -1.543016 | -4.525574 | -2.258019 |
| H | -0.840049 | -5.395940 | -0.849000 |
| H | -2.232423 | -6.114555 | -1.741656 |
| C | -3.112912 | -5.282312 | 0.769048  |
| H | -3.778473 | -4.711410 | 1.451736  |
| H | -3.625569 | -6.217999 | 0.462959  |
| H | -2.194710 | -5.558778 | 1.328928  |
| C | -5.874389 | -0.729105 | -2.271152 |
| H | -5.082504 | -0.051159 | -1.892073 |
| C | -7.153455 | -0.369024 | -1.507608 |
| H | -7.365980 | 0.716587  | -1.611787 |
| H | -8.024927 | -0.939297 | -1.893137 |
| H | -7.025529 | -0.593917 | -0.427091 |
| C | -6.014369 | -0.406601 | -3.764299 |
| H | -6.162817 | 0.685618  | -3.903170 |
| H | -5.090525 | -0.704737 | -4.304523 |
| H | -6.880824 | -0.933672 | -4.215352 |
| C | -3.769700 | 2.906560  | 0.723030  |
| H | -3.441457 | 2.245672  | -0.100410 |
| C | -3.129777 | -1.296035 | 3.700854  |
| H | -2.628897 | -1.710176 | 2.804201  |
| C | -2.100122 | -1.370537 | 4.839195  |
| H | -1.205996 | -0.764079 | 4.584459  |
| H | -2.518843 | -1.005783 | 5.799325  |
| H | -1.778014 | -2.419536 | 4.997146  |
| C | -4.328478 | -2.206888 | 3.992664  |
| H | -4.820026 | -1.929392 | 4.948973  |
| H | -5.074018 | -2.134538 | 3.173114  |
| H | -3.993725 | -3.264172 | 4.061332  |
| C | -2.748018 | 4.047797  | 0.807092  |
| H | -3.039053 | 4.793349  | 1.576482  |
| H | -1.746661 | 3.640200  | 1.062514  |
| H | -2.668254 | 4.568869  | -0.168693 |
| C | -5.149350 | 3.423322  | 0.291577  |
| H | -5.879930 | 2.586038  | 0.276879  |
| H | -5.520648 | 4.216041  | 0.973791  |
| H | -5.093545 | 3.848237  | -0.732854 |
| H | -1.314256 | 2.956116  | -1.831115 |
| H | -3.294264 | 4.285277  | -2.473043 |
| C | -1.919830 | 2.638166  | -2.670349 |
| C | -3.044586 | 3.389496  | -3.024437 |
| C | -1.581177 | 1.482076  | -3.397527 |
| C | -3.846944 | 2.989582  | -4.094707 |
| H | -4.719092 | 3.570953  | -4.364186 |
| C | -2.396933 | 1.088443  | -4.473020 |
| C | -3.521825 | 1.841648  | -4.819678 |
| H | -2.161746 | 0.201149  | -5.047495 |
| H | -4.143285 | 1.533661  | -5.650512 |
| C | 1.734831  | -2.611301 | -0.308258 |



|   |          |           |           |
|---|----------|-----------|-----------|
| H | 1.072463 | -3.089626 | 0.432585  |
| C | 1.217995 | -2.802058 | -1.714298 |
| H | 0.178426 | -2.479483 | -1.856478 |
| H | 1.829814 | -2.280084 | -2.463013 |
| H | 1.247074 | -3.868314 | -2.001783 |
| B | 3.191021 | -3.090007 | -0.089004 |
| O | 4.144744 | -3.137721 | -1.089073 |
| O | 3.669031 | -3.604470 | 1.094738  |
| C | 5.086659 | -3.847128 | 0.931854  |
| C | 5.205088 | -4.010955 | -0.616381 |
| C | 5.815788 | -2.617394 | 1.448279  |
| H | 5.537898 | -1.718181 | 0.877904  |
| H | 5.551087 | -2.443147 | 2.500302  |
| H | 6.906968 | -2.733906 | 1.396503  |
| C | 5.464321 | -5.073477 | 1.732358  |
| H | 4.834970 | -5.935361 | 1.479890  |
| H | 6.514681 | -5.347910 | 1.559048  |
| H | 5.343468 | -4.876204 | 2.806453  |
| C | 4.853120 | -5.414788 | -1.084004 |
| H | 5.631659 | -6.142702 | -0.817982 |
| H | 3.902215 | -5.755206 | -0.649611 |
| H | 4.745087 | -5.419713 | -2.176735 |
| C | 6.526028 | -3.574457 | -1.205844 |
| H | 6.500350 | -3.656231 | -2.300695 |
| H | 6.777895 | -2.538633 | -0.949639 |
| H | 7.341675 | -4.215907 | -0.842960 |

170

Figure\_S7\_imid-3\_modeC\_ed(AS) / electronic energy: -4442.756964750907 a.u. / lowest freq: 15.13 cm<sup>-1</sup>

|    |           |           |           |
|----|-----------|-----------|-----------|
| C  | -0.514853 | -2.788972 | -2.284365 |
| H  | -0.305518 | -3.699410 | -1.703029 |
| C  | 0.727979  | -1.897086 | -2.457980 |
| H  | 0.711253  | -1.336702 | -3.409813 |
| C  | -0.736623 | -0.866952 | -0.936585 |
| C  | -2.711364 | -2.232619 | -1.045410 |
| C  | -3.743947 | -1.365317 | -1.417123 |
| C  | -3.001972 | -3.327023 | -0.207896 |
| C  | -5.049290 | -1.578706 | -0.982710 |
| H  | -3.516044 | -0.511030 | -2.056103 |
| C  | -4.319229 | -3.542775 | 0.204432  |
| C  | -5.341512 | -2.678029 | -0.178392 |
| H  | -5.832686 | -0.883929 | -1.292706 |
| H  | -4.522597 | -4.391574 | 0.859068  |
| H  | -6.363378 | -2.862126 | 0.160414  |
| S  | -1.752246 | -4.459770 | 0.422919  |
| O  | -2.386173 | -5.127547 | 1.599541  |
| O  | -0.608510 | -3.607070 | 0.869676  |
| O  | -1.430559 | -5.383886 | -0.680274 |
| Cu | -1.765772 | 0.684112  | -0.251866 |
| C  | -1.163387 | -3.161034 | -3.593101 |
| C  | -1.215698 | -4.506233 | -3.998483 |
| C  | -1.728705 | -2.175453 | -4.424188 |
| C  | -1.825765 | -4.857527 | -5.206467 |
| H  | -0.780969 | -5.284113 | -3.384109 |
| C  | -2.338545 | -2.531491 | -5.630182 |
| H  | -1.699558 | -1.133028 | -4.137748 |
| C  | -2.387841 | -3.871520 | -6.020874 |
| H  | -1.862098 | -5.895293 | -5.511654 |
| H  | -2.773117 | -1.767747 | -6.262070 |
| H  | -2.860124 | -4.145713 | -6.955310 |
| N  | -1.393246 | -1.912734 | -1.475474 |
| N  | 0.532496  | -0.918570 | -1.365224 |
| C  | -2.627564 | 1.646682  | 1.346863  |
| C  | -2.173163 | 3.041791  | 1.332323  |
| C  | -3.064907 | 4.090238  | 1.611833  |
| C  | -0.848422 | 3.378838  | 1.002293  |
| C  | -2.651970 | 5.419887  | 1.558290  |
| C  | -0.436288 | 4.704057  | 0.941825  |
| C  | -1.336717 | 5.735556  | 1.219368  |
| H  | -3.367782 | 6.217279  | 1.775538  |
| H  | 0.596029  | 4.934119  | 0.670964  |
| H  | -1.014212 | 6.777829  | 1.166072  |
| C  | -1.842728 | 0.550761  | 1.759423  |
| C  | -2.446755 | -0.760535 | 2.102231  |
| H  | -3.393526 | -0.927208 | 1.566964  |
| H  | -1.774737 | -1.601975 | 1.869492  |
| H  | -0.146132 | 2.578825  | 0.741208  |
| H  | -0.834312 | 0.736966  | 2.149980  |
| P  | -1.765294 | -1.357501 | 4.599103  |
| O  | -2.638223 | -1.518472 | 5.928838  |
| O  | -1.000392 | -2.601816 | 4.311969  |
| O  | -0.838271 | -0.056947 | 4.814789  |
| O  | -2.819409 | -0.854431 | 3.525610  |
| Na | -0.745061 | -4.494288 | 3.174341  |
| H  | -3.715468 | 1.497093  | 1.314780  |
| H  | -4.098841 | 3.853521  | 1.880825  |
| C  | -3.449057 | -0.445005 | 6.407236  |
| H  | -3.792017 | -0.723307 | 7.408397  |
| H  | -2.873834 | 0.489418  | 6.467814  |

|   |           |           |           |
|---|-----------|-----------|-----------|
| H | -4.317067 | -0.293517 | 5.752661  |
| C | 0.323903  | -0.171642 | 5.631594  |
| H | 0.732027  | 0.835874  | 5.753742  |
| H | 0.078506  | -0.574220 | 6.625131  |
| H | 1.073769  | -0.818808 | 5.157593  |
| C | 1.551488  | -0.112427 | -0.803323 |
| C | 2.468602  | 0.551342  | -1.630336 |
| C | 1.722266  | -0.068948 | 0.592021  |
| C | 3.538051  | 1.260276  | -1.069321 |
| C | 2.825858  | 0.592288  | 1.151677  |
| C | 3.721458  | 1.269635  | 0.317174  |
| H | 4.579148  | 1.777280  | 0.743225  |
| H | 1.049321  | -0.623242 | 1.234902  |
| H | 2.352184  | 0.515337  | -2.706712 |
| C | 3.124850  | 0.481439  | 2.598014  |
| C | 2.976540  | 1.612878  | 3.451103  |
| C | 3.654785  | -0.734770 | 3.121687  |
| C | 3.400905  | 1.516739  | 4.789675  |
| C | 4.018780  | -0.790140 | 4.479816  |
| C | 3.906875  | 0.327103  | 5.296632  |
| H | 3.328432  | 2.365058  | 5.457004  |
| H | 4.409904  | -1.701616 | 4.911970  |
| H | 4.209464  | 0.268753  | 6.334294  |
| C | 4.499783  | 1.966304  | -1.935212 |
| C | 5.702729  | 1.319040  | -2.334484 |
| C | 4.252651  | 3.314732  | -2.316462 |
| C | 6.639223  | 2.040445  | -3.097693 |
| C | 5.208203  | 3.982180  | -3.104671 |
| C | 6.387503  | 3.351749  | -3.485153 |
| H | 7.575964  | 1.589234  | -3.396379 |
| H | 5.051010  | 5.006489  | -3.415806 |
| H | 7.117278  | 3.887452  | -4.078689 |
| C | 2.998693  | 4.070421  | -1.873818 |
| H | 2.335990  | 3.427214  | -1.259456 |
| C | 2.161411  | 4.510245  | -3.080671 |
| H | 1.915674  | 3.629688  | -3.712087 |
| H | 1.208770  | 4.966173  | -2.735609 |
| H | 2.702894  | 5.256902  | -3.698524 |
| C | 3.365106  | 5.269012  | -0.989465 |
| H | 3.942055  | 4.923363  | -0.105110 |
| H | 3.971888  | 6.012952  | -1.546885 |
| H | 2.445275  | 5.774422  | -0.628398 |
| C | 6.021415  | -0.122860 | -1.935870 |
| H | 5.158711  | -0.597531 | -1.424427 |
| C | 7.189282  | -0.166970 | -0.944750 |
| H | 7.360400  | -1.210571 | -0.603761 |
| H | 8.123691  | 0.212549  | -1.409883 |
| H | 6.952772  | 0.452902  | -0.053390 |
| C | 6.308993  | -0.996505 | -3.163753 |
| H | 6.441413  | -2.053919 | -2.851939 |
| H | 5.456994  | -0.943529 | -3.874756 |
| H | 7.234731  | -0.677394 | -3.685728 |
| C | 3.854251  | -1.983040 | 2.261202  |
| H | 3.597156  | -1.790463 | 1.202498  |
| C | 2.363787  | 2.925993  | 2.968352  |
| H | 2.016332  | 2.839187  | 1.919576  |
| C | 1.126167  | 3.297441  | 3.798732  |
| H | 0.361966  | 2.495476  | 3.718085  |
| H | 1.378583  | 3.447431  | 4.868532  |
| H | 0.682076  | 4.242479  | 3.424888  |
| C | 3.398538  | 4.056626  | 2.990222  |
| H | 3.721459  | 4.285787  | 4.027649  |
| H | 4.288947  | 3.769200  | 2.391533  |
| H | 2.964617  | 4.976830  | 2.543456  |
| C | 2.933837  | -3.114904 | 2.733414  |
| H | 3.181139  | -3.430526 | 3.768731  |
| H | 1.876203  | -2.775753 | 2.703874  |
| H | 3.032697  | -3.996430 | 2.066898  |
| C | 5.322724  | -2.427388 | 2.245360  |
| H | 5.970650  | -1.581966 | 1.928705  |
| H | 5.652133  | -2.781283 | 3.244452  |
| H | 5.460593  | -3.257208 | 1.519838  |
| H | 1.790850  | -3.183348 | -0.264617 |
| H | 3.883686  | -4.487537 | -0.150486 |
| C | 2.404278  | -3.282154 | -1.149773 |
| C | 3.590045  | -4.019244 | -1.079666 |
| C | 2.016610  | -2.673194 | -2.357326 |
| C | 4.395053  | -4.160847 | -2.211397 |
| H | 5.311929  | -4.733055 | -2.155286 |
| C | 2.837719  | -2.818105 | -3.489259 |
| C | 4.016721  | -3.564626 | -3.416070 |
| H | 2.561179  | -2.363720 | -4.432468 |
| H | 4.641196  | -3.675590 | -4.293052 |
| C | -2.010724 | 1.652493  | -2.051238 |
| H | -2.027265 | 0.793263  | -2.743624 |
| C | -0.810111 | 2.538318  | -2.322472 |
| H | 0.155091  | 2.013458  | -2.222599 |
| H | -0.806898 | 2.972501  | -3.341139 |

|   |           |          |           |
|---|-----------|----------|-----------|
| H | -0.765559 | 3.397929 | -1.635795 |
| B | -3.368504 | 2.333837 | -1.996759 |
| O | -4.593281 | 1.681776 | -2.178112 |
| O | -3.570994 | 3.695663 | -1.789690 |
| C | -4.941914 | 3.990003 | -2.107356 |
| C | -5.639976 | 2.615211 | -1.852836 |
| C | -5.430076 | 5.123339 | -1.229214 |
| H | -5.285539 | 4.908297 | -0.163481 |
| H | -4.874551 | 6.043867 | -1.457617 |
| H | -6.497639 | 5.324810 | -1.402337 |
| C | -4.992077 | 4.400080 | -3.572729 |
| H | -4.668910 | 3.578279 | -4.227455 |
| H | -6.001389 | 4.708195 | -3.880416 |
| H | -4.314004 | 5.248327 | -3.738199 |
| C | -6.842587 | 2.339698 | -2.730661 |
| H | -7.620043 | 3.104696 | -2.587842 |
| H | -6.573914 | 2.316890 | -3.794010 |
| H | -7.286120 | 1.366317 | -2.477712 |
| C | -5.994197 | 2.424424 | -0.386275 |
| H | -6.247671 | 1.372566 | -0.195043 |
| H | -5.140565 | 2.689248 | 0.252347  |
| H | -6.851897 | 3.041867 | -0.083510 |

170

Figure\_S7\_imid-3\_modeC\_ts(AS)\_01 / electronic energy: -4442.743156008483 a.u. / lowest freq: -264.88 cm-1

|    |           |           |           |
|----|-----------|-----------|-----------|
| C  | -0.488640 | -2.975098 | -2.125358 |
| H  | -0.298926 | -3.850639 | -1.485848 |
| C  | 0.760819  | -2.097891 | -2.331033 |
| H  | 0.771364  | -1.607333 | -3.320151 |
| C  | -0.730841 | -0.977964 | -0.910249 |
| C  | -2.707878 | -2.341166 | -0.954809 |
| C  | -3.737343 | -1.519663 | -1.421475 |
| C  | -3.001646 | -3.355059 | -0.023135 |
| C  | -5.047843 | -1.699568 | -0.985816 |
| H  | -3.506459 | -0.727711 | -2.134895 |
| C  | -4.322034 | -3.538244 | 0.392015  |
| C  | -5.343386 | -2.719026 | -0.084472 |
| H  | -5.830655 | -1.041321 | -1.368214 |
| H  | -4.529292 | -4.322221 | 1.121813  |
| H  | -6.368076 | -2.875197 | 0.259355  |
| S  | -1.743964 | -4.406816 | 0.719371  |
| O  | -2.392771 | -5.013285 | 1.918286  |
| O  | -0.642273 | -3.484275 | 1.132570  |
| O  | -1.362543 | -5.390343 | -0.311282 |
| Cu | -1.732039 | 0.598633  | -0.258154 |
| C  | -1.115937 | -3.419954 | -3.421127 |
| C  | -1.164520 | -4.785859 | -3.750544 |
| C  | -1.664586 | -2.481726 | -4.316010 |
| C  | -1.754149 | -5.203760 | -4.947417 |
| H  | -0.742922 | -5.528684 | -3.085473 |
| C  | -2.254107 | -2.904487 | -5.510511 |
| H  | -1.638602 | -1.424430 | -4.087609 |
| C  | -2.299470 | -4.264405 | -5.825911 |
| H  | -1.787680 | -6.257041 | -5.194213 |
| H  | -2.676011 | -2.177085 | -6.191911 |
| H  | -2.755914 | -4.590253 | -6.751588 |
| N  | -1.380959 | -2.050565 | -1.385808 |
| N  | 0.542033  | -1.041424 | -1.316690 |
| C  | -2.575749 | 1.801622  | 1.173599  |
| C  | -2.210409 | 3.216644  | 1.079503  |
| C  | -3.175444 | 4.220692  | 1.256901  |
| C  | -0.895416 | 3.609612  | 0.777305  |
| C  | -2.840401 | 5.566092  | 1.131809  |
| C  | -0.559552 | 4.951587  | 0.647667  |
| C  | -1.532119 | 5.938347  | 0.822621  |
| H  | -3.608595 | 6.330697  | 1.272430  |
| H  | 0.467427  | 5.230433  | 0.403077  |
| H  | -1.270059 | 6.993365  | 0.715519  |
| C  | -1.747005 | 0.811490  | 1.772080  |
| C  | -2.178923 | -0.518895 | 1.954560  |
| H  | -3.135574 | -0.825702 | 1.523897  |
| H  | -1.446174 | -1.321469 | 2.061438  |
| H  | -0.138889 | 2.839139  | 0.596028  |
| H  | -0.754521 | 1.087224  | 2.144392  |
| P  | -1.813680 | -1.062843 | 4.784973  |
| O  | -2.494805 | -1.046507 | 6.261213  |
| O  | -1.014533 | -2.329348 | 4.674770  |
| O  | -0.834053 | 0.246430  | 4.786248  |
| O  | -2.903267 | -0.718741 | 3.756769  |
| Na | -0.832034 | -4.174333 | 3.492115  |
| H  | -3.650626 | 1.576259  | 1.129346  |
| H  | -4.201494 | 3.936499  | 1.508254  |
| C  | -3.293576 | 0.061476  | 6.642661  |
| H  | -3.630899 | -0.112228 | 7.670705  |
| H  | -2.719191 | 1.000391  | 6.611607  |
| H  | -4.171925 | 0.165482  | 5.989563  |
| C  | 0.334502  | 0.199764  | 5.583419  |
| H  | 0.759154  | 1.209345  | 5.611821  |
| H  | 0.110673  | -0.110340 | 6.616292  |

|   |           |           |           |
|---|-----------|-----------|-----------|
| H | 1.077716  | -0.494987 | 5.165830  |
| C | 1.546381  | -0.180618 | -0.810643 |
| C | 2.464063  | 0.424541  | -1.680892 |
| C | 1.706200  | -0.024636 | 0.578535  |
| C | 3.524041  | 1.183594  | -1.170553 |
| C | 2.803850  | 0.684303  | 1.092096  |
| C | 3.700358  | 1.299637  | 0.211722  |
| H | 4.553713  | 1.842706  | 0.600887  |
| H | 1.031997  | -0.530360 | 1.258483  |
| H | 2.354830  | 0.305194  | -2.751968 |
| C | 3.099983  | 0.686568  | 2.544499  |
| C | 2.974213  | 1.887304  | 3.302503  |
| C | 3.615673  | -0.489785 | 3.165670  |
| C | 3.404736  | 1.895439  | 4.642593  |
| C | 3.983844  | -0.438403 | 4.522943  |
| C | 3.893512  | 0.743952  | 5.244729  |
| H | 3.350678  | 2.797261  | 5.237527  |
| H | 4.362704  | -1.316866 | 5.028164  |
| H | 4.200242  | 0.766856  | 6.282572  |
| C | 4.482043  | 1.833624  | -2.083031 |
| C | 5.697444  | 1.175557  | -2.421950 |
| C | 4.218242  | 3.144327  | -2.570045 |
| C | 6.629646  | 1.849504  | -3.232319 |
| C | 5.171193  | 3.763703  | -3.399439 |
| C | 6.362649  | 3.123411  | -3.721369 |
| H | 7.574996  | 1.390278  | -3.488718 |
| H | 5.001982  | 4.758688  | -3.789471 |
| H | 7.089761  | 3.622651  | -4.348982 |
| C | 2.948247  | 3.911561  | -2.198602 |
| H | 2.290229  | 3.307731  | -1.541057 |
| C | 2.115944  | 4.241973  | -3.443275 |
| H | 1.885440  | 3.310106  | -4.002741 |
| H | 1.155462  | 4.713169  | -3.143502 |
| H | 2.653858  | 4.942498  | -4.115831 |
| C | 3.285614  | 5.181005  | -1.407060 |
| H | 3.869612  | 4.916479  | -0.499717 |
| H | 3.875240  | 5.895021  | -2.019414 |
| H | 2.352820  | 5.688601  | -1.083925 |
| C | 6.033291  | -0.226047 | -1.909888 |
| H | 5.173815  | -0.671390 | -1.367535 |
| C | 7.195252  | -0.175902 | -0.912082 |
| H | 7.378149  | -1.186961 | -0.489076 |
| H | 8.127498  | 0.178777  | -1.400570 |
| H | 6.944768  | 0.508824  | -0.073566 |
| C | 6.340425  | -1.189139 | -3.063846 |
| H | 6.484407  | -2.217079 | -2.669215 |
| H | 5.492395  | -1.203834 | -3.781407 |
| H | 7.265211  | -0.898954 | -3.604131 |
| C | 3.798879  | -1.807183 | 2.411283  |
| H | 3.545307  | -1.699722 | 1.340029  |
| C | 2.381443  | 3.167312  | 2.716655  |
| H | 2.019140  | 2.998510  | 1.683139  |
| C | 1.162872  | 3.635500  | 3.526505  |
| H | 0.386391  | 2.841936  | 3.538634  |
| H | 1.435746  | 3.885720  | 4.572250  |
| H | 0.725707  | 4.546284  | 3.069231  |
| C | 3.438654  | 4.274203  | 2.632286  |
| H | 3.780485  | 4.581017  | 3.643285  |
| H | 4.315193  | 3.920927  | 2.048909  |
| H | 3.016628  | 5.163541  | 2.116912  |
| C | 2.863463  | -2.883709 | 2.974709  |
| H | 3.108433  | -3.117454 | 4.032070  |
| H | 1.810504  | -2.532938 | 2.919035  |
| H | 2.948268  | -3.817869 | 2.382132  |
| C | 5.261624  | -2.270372 | 2.434054  |
| H | 5.920550  | -1.462362 | 2.049563  |
| H | 5.586481  | -2.545175 | 3.459148  |
| H | 5.389266  | -3.158856 | 1.779842  |
| H | 1.751711  | -3.235718 | -0.025515 |
| H | 3.841344  | -4.522828 | 0.241641  |
| C | 2.394491  | -3.389364 | -0.881664 |
| C | 3.578957  | -4.115137 | -0.724678 |
| C | 2.045702  | -2.862256 | -2.138524 |
| C | 4.423266  | -4.323519 | -1.816801 |
| H | 5.339560  | -4.885949 | -1.693050 |
| C | 2.905467  | -3.074966 | -3.230425 |
| C | 4.084187  | -3.807991 | -3.069366 |
| H | 2.660080  | -2.683223 | -4.209662 |
| H | 4.738501  | -3.971590 | -3.915825 |
| C | -1.989065 | 1.489476  | -2.081285 |
| H | -1.970058 | 0.591956  | -2.721666 |
| C | -0.813606 | 2.389842  | -2.387534 |
| H | 0.164362  | 1.900384  | -2.255745 |
| H | -0.827741 | 2.750640  | -3.432869 |
| H | -0.807763 | 3.295209  | -1.763901 |
| B | -3.372733 | 2.144957  | -2.095884 |
| O | -4.565636 | 1.454043  | -2.273511 |
| O | -3.594239 | 3.506906  | -1.981862 |

|   |           |          |           |
|---|-----------|----------|-----------|
| C | -4.961603 | 3.756633 | -2.374129 |
| C | -5.647306 | 2.387201 | -2.060024 |
| C | -5.506690 | 4.932267 | -1.592719 |
| H | -5.415064 | 4.787752 | -0.509754 |
| H | -4.956658 | 5.847094 | -1.853425 |
| H | -6.567287 | 5.101129 | -1.830372 |
| C | -4.949978 | 4.071508 | -3.862795 |
| H | -4.581019 | 3.218218 | -4.449360 |
| H | -5.949634 | 4.336425 | -4.234583 |
| H | -4.282610 | 4.923096 | -4.051734 |
| C | -6.798187 | 2.027807 | -2.974585 |
| H | -7.596598 | 2.781685 | -2.916494 |
| H | -6.478419 | 1.944890 | -4.020420 |
| H | -7.232505 | 1.062458 | -2.679923 |
| C | -6.064951 | 2.278186 | -0.602745 |
| H | -6.314012 | 1.236183 | -0.360268 |
| H | -5.247918 | 2.594400 | 0.060498  |
| H | -6.943628 | 2.898901 | -0.378769 |

170

Figure\_S7\_imid-3\_modeC ts(AS)\_02 / electronic energy: -4442.739381669286 a.u. / lowest freq: -279.72 cm-1

|    |           |           |           |
|----|-----------|-----------|-----------|
| C  | 0.605150  | -1.461999 | 3.195530  |
| H  | 0.592251  | -2.551272 | 3.044501  |
| C  | -0.768265 | -0.804762 | 2.953169  |
| H  | -0.938630 | 0.067739  | 3.607551  |
| C  | 0.674772  | -0.235624 | 1.190244  |
| C  | 2.810581  | -1.093155 | 1.890041  |
| C  | 3.668204  | 0.008699  | 1.933416  |
| C  | 3.332011  | -2.359989 | 1.563903  |
| C  | 5.026747  | -0.128988 | 1.659925  |
| H  | 3.265298  | 0.988289  | 2.190133  |
| C  | 4.699280  | -2.490231 | 1.312042  |
| C  | 5.546714  | -1.384671 | 1.357513  |
| H  | 5.668240  | 0.753768  | 1.700905  |
| H  | 5.082781  | -3.479524 | 1.056765  |
| H  | 6.612302  | -1.509223 | 1.152178  |
| S  | 2.312321  | -3.834225 | 1.399624  |
| O  | 3.164227  | -4.825091 | 0.682659  |
| O  | 1.157100  | -3.416047 | 0.548265  |
| O  | 1.948129  | -4.248359 | 2.768002  |
| Cu | 1.474568  | 1.020965  | -0.115231 |
| C  | 1.179385  | -1.147826 | 4.553154  |
| C  | 1.400898  | -2.178802 | 5.483216  |
| C  | 1.507792  | 0.174069  | 4.908797  |
| C  | 1.944522  | -1.893337 | 6.739260  |
| H  | 1.150111  | -3.203416 | 5.240660  |
| C  | 2.052160  | 0.454355  | 6.165078  |
| H  | 1.344795  | 0.986370  | 4.213429  |
| C  | 2.271123  | -0.578474 | 7.079481  |
| H  | 2.112229  | -2.692531 | 7.449629  |
| H  | 2.304335  | 1.473095  | 6.429606  |
| H  | 2.692425  | -0.359874 | 8.052160  |
| N  | 1.422099  | -0.858991 | 2.112723  |
| N  | -0.606948 | -0.297298 | 1.571962  |
| C  | 2.208352  | 1.600516  | -1.936747 |
| C  | 1.663625  | 2.854268  | -2.462107 |
| C  | 2.508374  | 3.811184  | -3.047185 |
| C  | 0.290747  | 3.144607  | -2.384123 |
| C  | 2.002200  | 5.015517  | -3.528898 |
| C  | -0.215694 | 4.347190  | -2.861704 |
| C  | 0.638576  | 5.291539  | -3.435141 |
| H  | 2.680040  | 5.746433  | -3.977061 |
| H  | -1.285286 | 4.551489  | -2.784207 |
| H  | 0.240633  | 6.238919  | -3.805632 |
| C  | 1.536362  | 0.350536  | -2.042792 |
| C  | 2.141381  | -0.878597 | -1.702573 |
| H  | 3.104705  | -0.866261 | -1.182431 |
| H  | 1.503587  | -1.734669 | -1.473867 |
| H  | -0.380322 | 2.427492  | -1.900720 |
| H  | 0.529894  | 0.319302  | -2.474370 |
| P  | 2.628118  | -3.117972 | -3.456902 |
| O  | 3.650266  | -3.918045 | -2.442276 |
| O  | 1.295162  | -3.736023 | -3.146281 |
| O  | 3.187765  | -3.442938 | -4.942147 |
| O  | 2.873394  | -1.605127 | -3.320333 |
| Na | 1.726374  | -4.994847 | -1.230346 |
| H  | 3.300498  | 1.561838  | -1.818674 |
| H  | 3.577959  | 3.597596  | -3.132205 |
| C  | 5.012376  | -3.537897 | -2.350503 |
| H  | 5.454071  | -4.078329 | -1.505160 |
| H  | 5.562081  | -3.799313 | -3.268092 |
| H  | 5.112321  | -2.455568 | -2.177815 |
| C  | 3.058765  | -4.762142 | -5.449543 |
| H  | 3.399035  | -4.748479 | -6.490629 |
| H  | 3.682611  | -5.472512 | -4.884606 |
| H  | 2.014305  | -5.104092 | -5.419572 |
| C  | -1.673690 | 0.045728  | 0.705443  |
| C  | -2.754597 | 0.804299  | 1.175930  |
| C  | -1.713665 | -0.474855 | -0.599803 |

|   |           |           |           |
|---|-----------|-----------|-----------|
| C | -3.859323 | 1.044840  | 0.349168  |
| C | -2.839984 | -0.276506 | -1.412574 |
| C | -3.906682 | 0.493233  | -0.935693 |
| H | -4.786136 | 0.639238  | -1.551452 |
| H | -0.908848 | -1.107679 | -0.950434 |
| H | -2.738399 | 1.203902  | 2.182609  |
| C | -2.963279 | -0.972446 | -2.715658 |
| C | -2.929164 | -0.233859 | -3.935492 |
| C | -3.188497 | -2.381280 | -2.748683 |
| C | -3.139942 | -0.914774 | -5.149361 |
| C | -3.343465 | -3.017484 | -3.994082 |
| C | -3.329264 | -2.289858 | -5.176131 |
| H | -3.152846 | -0.381597 | -6.090387 |
| H | -3.499497 | -4.086421 | -4.054695 |
| H | -3.473000 | -2.795871 | -6.122280 |
| C | -4.993407 | 1.849477  | 0.838697  |
| C | -6.139052 | 1.203934  | 1.382875  |
| C | -4.962536 | 3.266585  | 0.714147  |
| C | -7.236225 | 1.990899  | 1.778696  |
| C | -6.073213 | 4.009911  | 1.154183  |
| C | -7.196491 | 3.376819  | 1.674406  |
| H | -8.133389 | 1.532356  | 2.172625  |
| H | -6.081073 | 5.089368  | 1.080297  |
| H | -8.047305 | 3.965455  | 1.992927  |
| C | -3.775128 | 4.004692  | 0.093827  |
| H | -2.980575 | 3.297964  | -0.220919 |
| C | -3.123028 | 4.953417  | 1.106450  |
| H | -2.823880 | 4.388844  | 2.015504  |
| H | -2.210647 | 5.409793  | 0.666293  |
| H | -3.815903 | 5.769530  | 1.400390  |
| C | -4.196446 | 4.755667  | -1.175379 |
| H | -4.640215 | 4.045019  | -1.905215 |
| H | -4.937839 | 5.550262  | -0.949030 |
| H | -3.312463 | 5.232103  | -1.647970 |
| C | -6.223286 | -0.316288 | 1.528947  |
| H | -5.256413 | -0.797575 | 1.274523  |
| C | -7.263420 | -0.898024 | 0.565653  |
| H | -7.260314 | -2.007499 | 0.626246  |
| H | -8.283323 | -0.531706 | 0.808825  |
| H | -7.016231 | -0.608711 | -0.478284 |
| C | -6.523591 | -0.727299 | 2.976195  |
| H | -6.469459 | -1.832204 | 3.073891  |
| H | -5.774304 | -0.276849 | 3.661604  |
| H | -7.538252 | -0.406104 | 3.290466  |
| C | -3.291502 | -3.229864 | -1.480087 |
| H | -3.217684 | -2.606994 | -0.568699 |
| C | -2.675637 | 1.272609  | -3.976597 |
| H | -2.420717 | 1.657888  | -2.969303 |
| C | -1.481488 | 1.616691  | -4.880286 |
| H | -0.575128 | 1.073071  | -4.540857 |
| H | -1.679060 | 1.356170  | -5.940299 |
| H | -1.274359 | 2.705473  | -4.839988 |
| C | -3.931832 | 2.025587  | -4.429464 |
| H | -4.200529 | 1.763637  | -5.474751 |
| H | -4.787240 | 1.776168  | -3.766854 |
| H | -3.759197 | 3.121732  | -4.371963 |
| C | -2.142130 | -4.242745 | -1.411503 |
| H | -2.195037 | -4.970623 | -2.248064 |
| H | -1.168696 | -3.710124 | -1.459523 |
| H | -2.180587 | -4.806488 | -0.456693 |
| C | -4.654612 | -3.927212 | -1.380860 |
| H | -5.470327 | -3.176354 | -1.456905 |
| H | -4.784149 | -4.684304 | -2.182154 |
| H | -4.748712 | -4.439540 | -0.399690 |
| H | -1.364056 | -3.012758 | 1.416899  |
| H | -3.228584 | -4.602304 | 1.720071  |
| C | -2.061351 | -2.865061 | 2.230185  |
| C | -3.117710 | -3.765601 | 2.395825  |
| C | -1.911468 | -1.775940 | 3.108264  |
| C | -4.029337 | -3.592055 | 3.438707  |
| H | -4.846119 | -4.290662 | 3.565477  |
| C | -2.838264 | -1.608600 | 4.152179  |
| C | -3.888917 | -2.517205 | 4.318590  |
| H | -2.745803 | -0.780670 | 4.843919  |
| H | -4.593997 | -2.384009 | 5.127087  |
| C | 1.493678  | 2.651518  | 1.123241  |
| H | 1.546298  | 2.138539  | 2.097512  |
| C | 0.185266  | 3.397468  | 0.984424  |
| H | -0.702626 | 2.746905  | 1.041638  |
| H | 0.052065  | 4.153776  | 1.780153  |
| H | 0.117363  | 3.951697  | 0.037433  |
| B | 2.773582  | 3.448816  | 0.857668  |
| O | 4.029737  | 3.089977  | 1.334377  |
| O | 2.827024  | 4.644312  | 0.161106  |
| C | 4.118329  | 5.236655  | 0.416184  |
| C | 4.994978  | 3.985197  | 0.741028  |
| C | 4.558419  | 6.023375  | -0.799223 |
| H | 4.562616  | 5.408745  | -1.707184 |

|   |          |          |           |
|---|----------|----------|-----------|
| H | 3.872687 | 6.864323 | -0.971293 |
| H | 5.567143 | 6.437419 | -0.655060 |
| C | 3.956024 | 6.160062 | 1.614936  |
| H | 3.658560 | 5.600343 | 2.513060  |
| H | 4.881692 | 6.707145 | 1.841855  |
| H | 3.170426 | 6.897758 | 1.403546  |
| C | 6.114513 | 4.233883 | 1.727938  |
| H | 6.810731 | 4.995784 | 1.348230  |
| H | 5.735175 | 4.568493 | 2.701087  |
| H | 6.691100 | 3.313053 | 1.892990  |
| C | 5.526262 | 3.314651 | -0.515574 |
| H | 5.934933 | 2.325012 | -0.269128 |
| H | 4.722732 | 3.175308 | -1.252339 |
| H | 6.325283 | 3.901303 | -0.990004 |

170

Figure\_S7\_imid-3\_modeC\_ts(AS)\_03 / electronic energy: -4442.737028981568 a.u. / lowest freq: -266.30 cm-1

|    |           |           |           |
|----|-----------|-----------|-----------|
| C  | -1.350344 | 2.401846  | -1.730509 |
| H  | -2.120856 | 1.944161  | -2.360754 |
| C  | 0.044144  | 1.793348  | -1.955383 |
| H  | 0.841379  | 2.520030  | -1.719853 |
| C  | -0.780609 | 1.003232  | 0.075230  |
| C  | -2.781051 | 2.258985  | 0.462872  |
| C  | -2.561794 | 2.648087  | 1.792502  |
| C  | -4.107660 | 2.087908  | 0.017125  |
| C  | -3.621130 | 2.835350  | 2.675671  |
| H  | -1.535273 | 2.829761  | 2.119747  |
| C  | -5.161696 | 2.303587  | 0.909625  |
| C  | -4.930062 | 2.663118  | 2.233488  |
| H  | -3.417336 | 3.139936  | 3.704528  |
| H  | -6.178165 | 2.160846  | 0.539485  |
| H  | -5.771101 | 2.816688  | 2.912734  |
| S  | -4.558218 | 1.567950  | -1.644808 |
| O  | -5.996730 | 1.185044  | -1.581321 |
| O  | -3.710750 | 0.362435  | -1.912349 |
| O  | -4.284984 | 2.720625  | -2.521979 |
| Cu | -0.821269 | 0.220913  | 1.900121  |
| C  | -1.367829 | 3.893009  | -1.975037 |
| C  | -1.326932 | 4.354221  | -3.303485 |
| C  | -1.402656 | 4.839755  | -0.931382 |
| C  | -1.322064 | 5.723619  | -3.582185 |
| H  | -1.300114 | 3.650370  | -4.126191 |
| C  | -1.394989 | 6.208314  | -1.215242 |
| H  | -1.411216 | 4.537112  | 0.103778  |
| C  | -1.355816 | 6.650220  | -2.538767 |
| H  | -1.290355 | 6.066195  | -4.608360 |
| H  | -1.413721 | 6.927400  | -0.406426 |
| H  | -1.348975 | 7.710547  | -2.755625 |
| N  | -1.614284 | 1.992482  | -0.320485 |
| N  | 0.062843  | 0.741826  | -0.927897 |
| C  | -1.533650 | -1.255927 | 3.135790  |
| C  | -0.622814 | -1.857099 | 4.113085  |
| C  | -1.064688 | -2.087484 | 5.426565  |
| C  | 0.698049  | -2.208806 | 3.786363  |
| C  | -0.228041 | -2.676116 | 6.371638  |
| C  | 1.533503  | -2.794295 | 4.730255  |
| C  | 1.074408  | -3.035523 | 6.025990  |
| H  | -0.595612 | -2.852634 | 7.385187  |
| H  | 2.558272  | -3.053818 | 4.462057  |
| H  | 1.735703  | -3.491587 | 6.766010  |
| C  | -1.636353 | -1.668992 | 1.784227  |
| C  | -2.711658 | -1.299047 | 0.953757  |
| H  | -3.403375 | -0.519699 | 1.287115  |
| H  | -2.616522 | -1.398168 | -0.128389 |
| H  | 1.081980  | -1.976467 | 2.789336  |
| H  | -0.902057 | -2.372278 | 1.381671  |
| P  | -5.004852 | -2.928942 | 0.038238  |
| O  | -6.085296 | -1.682549 | 0.050543  |
| O  | -4.587950 | -2.998317 | -1.402726 |
| O  | -5.865527 | -4.210508 | 0.540772  |
| O  | -3.999472 | -2.731653 | 1.180630  |
| Na | -5.571346 | -1.083663 | -2.299926 |
| H  | -2.425822 | -0.774202 | 3.564166  |
| H  | -2.085586 | -1.806660 | 5.700653  |
| C  | -6.649924 | -1.234239 | 1.269697  |
| H  | -7.323594 | -0.401365 | 1.037292  |
| H  | -7.225464 | -2.033731 | 1.761138  |
| H  | -5.874770 | -0.881187 | 1.966986  |
| C  | -6.881132 | -4.726213 | -0.304633 |
| H  | -7.263177 | -5.642408 | 0.159176  |
| H  | -7.713909 | -4.013322 | -0.412935 |
| H  | -6.489369 | -4.967673 | -1.303244 |
| C  | 1.122144  | -0.182312 | -0.786183 |
| C  | 2.400435  | 0.263294  | -0.441368 |
| C  | 0.921978  | -1.536805 | -1.096769 |
| C  | 3.473201  | -0.630265 | -0.382920 |
| C  | 2.004250  | -2.432453 | -1.074116 |
| C  | 3.275895  | -1.977916 | -0.701876 |
| H  | 4.115873  | -2.663036 | -0.694300 |

|   |           |           |           |
|---|-----------|-----------|-----------|
| H | -0.058368 | -1.879525 | -1.404879 |
| H | 2.569924  | 1.307943  | -0.247594 |
| C | 1.843811  | -3.827661 | -1.538472 |
| C | 1.545940  | -4.864431 | -0.609239 |
| C | 2.109977  | -4.150333 | -2.900266 |
| C | 1.517986  | -6.196794 | -1.060436 |
| C | 2.085444  | -5.500536 | -3.296661 |
| C | 1.784615  | -6.507615 | -2.387959 |
| H | 1.308047  | -7.008761 | -0.376882 |
| H | 2.313501  | -5.784042 | -4.315273 |
| H | 1.771184  | -7.540183 | -2.712764 |
| C | 4.821174  | -0.129071 | -0.055313 |
| C | 5.584951  | 0.546628  | -1.048685 |
| C | 5.343610  | -0.294041 | 1.258004  |
| C | 6.844678  | 1.065785  | -0.698855 |
| C | 6.616145  | 0.229270  | 1.551972  |
| C | 7.351011  | 0.907807  | 0.586282  |
| H | 7.447477  | 1.592225  | -1.427029 |
| H | 7.047135  | 0.114765  | 2.537770  |
| H | 8.325524  | 1.308579  | 0.834215  |
| C | 4.576117  | -1.033413 | 2.354344  |
| H | 3.570863  | -1.342209 | 2.003056  |
| C | 4.336081  | -0.135774 | 3.575767  |
| H | 3.856635  | 0.814666  | 3.262607  |
| H | 3.658105  | -0.643843 | 4.293859  |
| H | 5.285884  | 0.098923  | 4.100044  |
| C | 5.309774  | -2.320629 | 2.749705  |
| H | 5.457533  | -2.961670 | 1.854275  |
| H | 6.300411  | -2.097407 | 3.198932  |
| H | 4.712487  | -2.893675 | 3.488026  |
| C | 5.088236  | 0.712469  | -2.486271 |
| H | 4.101814  | 0.227191  | -2.630749 |
| C | 6.034123  | 0.030827  | -3.482729 |
| H | 5.594394  | 0.058221  | -4.502792 |
| H | 7.022336  | 0.535845  | -3.513590 |
| H | 6.182127  | -1.032837 | -3.198301 |
| C | 4.893225  | 2.192421  | -2.834687 |
| H | 4.460966  | 2.289444  | -3.853396 |
| H | 4.191302  | 2.661262  | -2.113314 |
| H | 5.856591  | 2.743641  | -2.808608 |
| C | 2.470993  | -3.082801 | -3.934163 |
| H | 2.338100  | -2.062643 | -3.519049 |
| C | 1.301695  | -4.583757 | 0.870222  |
| H | 1.284734  | -3.494625 | 1.059612  |
| C | -0.061179 | -5.120546 | 1.329840  |
| H | -0.864485 | -4.749785 | 0.657855  |
| H | -0.080809 | -6.230319 | 1.332743  |
| H | -0.279042 | -4.768061 | 2.360761  |
| C | 2.436528  | -5.156321 | 1.726852  |
| H | 2.494664  | -6.261019 | 1.630292  |
| H | 3.406781  | -4.715484 | 1.412518  |
| H | 2.272117  | -4.907080 | 2.795571  |
| C | 1.556119  | -3.153816 | -5.163887 |
| H | 1.711686  | -4.090375 | -5.738076 |
| H | 0.492449  | -3.096105 | -4.849416 |
| H | 1.770576  | -2.302347 | -5.842598 |
| C | 3.944098  | -3.199415 | -4.339528 |
| H | 4.591058  | -3.128158 | -3.439110 |
| H | 4.143128  | -4.165992 | -4.849176 |
| H | 4.216976  | -2.371064 | -5.027890 |
| H | -1.335096 | -0.227608 | -3.220302 |
| H | -1.028301 | -1.043546 | -5.526175 |
| C | -0.566320 | 0.213482  | -3.841214 |
| C | -0.392897 | -0.254144 | -5.146345 |
| C | 0.246098  | 1.248889  | -3.344554 |
| C | 0.603619  | 0.291191  | -5.959573 |
| H | 0.738895  | -0.075342 | -6.968844 |
| C | 1.253090  | 1.782618  | -4.167421 |
| C | 1.431840  | 1.302099  | -5.467259 |
| H | 1.892515  | 2.578960  | -3.808426 |
| H | 2.207929  | 1.719435  | -6.095647 |
| C | 0.303534  | 1.182732  | 3.304160  |
| H | 1.038285  | 0.367971  | 3.443409  |
| C | -0.457725 | 1.467395  | 4.585741  |
| H | -0.894863 | 0.571296  | 5.052322  |
| H | 0.180923  | 1.936078  | 5.357976  |
| H | -1.284534 | 2.178605  | 4.426301  |
| B | 0.998846  | 2.426038  | 2.731162  |
| O | 2.149139  | 2.442734  | 1.964609  |
| O | 0.579739  | 3.714749  | 3.030876  |
| C | 1.681806  | 4.602502  | 2.750053  |
| C | 2.471459  | 3.814410  | 1.648564  |
| C | 1.135038  | 5.944670  | 2.314889  |
| H | 0.419474  | 5.847179  | 1.489681  |
| H | 0.612289  | 6.427978  | 3.151143  |
| H | 1.943759  | 6.617354  | 1.994473  |
| C | 2.475999  | 4.744250  | 4.039871  |
| H | 2.886381  | 3.778006  | 4.366768  |



|   |          |          |           |
|---|----------|----------|-----------|
| H | 3.308765 | 5.452805 | 3.932285  |
| H | 1.816869 | 5.114373 | 4.836666  |
| C | 3.976633 | 3.973126 | 1.694528  |
| H | 4.271528 | 5.018841 | 1.524130  |
| H | 4.395038 | 3.647116 | 2.654227  |
| H | 4.439865 | 3.361476 | 0.907906  |
| C | 1.951122 | 4.121473 | 0.254899  |
| H | 2.498228 | 3.548404 | -0.503267 |
| H | 0.886644 | 3.864113 | 0.183609  |
| H | 2.069792 | 5.182063 | -0.002622 |

170

Figure\_S7\_imid-3\_modeC\_ts(AS)\_04 / electronic energy: -4442.743915610607 a.u. / lowest freq: -272.34 cm<sup>-1</sup>

|    |           |           |           |
|----|-----------|-----------|-----------|
| C  | 2.575193  | -1.458084 | -1.665408 |
| H  | 3.148694  | -0.645315 | -2.127025 |
| C  | 1.081098  | -1.416437 | -2.023185 |
| H  | 0.627885  | -2.421920 | -1.961799 |
| C  | 1.329611  | -0.669854 | 0.167012  |
| C  | 3.619984  | -1.102747 | 0.708201  |
| C  | 3.487211  | -1.779731 | 1.928383  |
| C  | 4.775732  | -0.329989 | 0.480354  |
| C  | 4.467144  | -1.689431 | 2.913061  |
| H  | 2.606264  | -2.406743 | 2.085005  |
| C  | 5.758570  | -0.262588 | 1.472385  |
| C  | 5.610804  | -0.929118 | 2.684385  |
| H  | 4.340250  | -2.235553 | 3.850400  |
| H  | 6.641178  | 0.347537  | 1.276251  |
| H  | 6.390834  | -0.855035 | 3.444724  |
| S  | 5.079754  | 0.624762  | -1.014191 |
| O  | 6.185985  | 1.565378  | -0.670828 |
| O  | 3.815678  | 1.384604  | -1.266300 |
| O  | 5.428214  | -0.353253 | -2.060724 |
| Cu | 0.895798  | -0.162138 | 2.035963  |
| C  | 3.221827  | -2.766622 | -2.056208 |
| C  | 3.516734  | -2.988265 | -3.413693 |
| C  | 3.525149  | -3.779377 | -1.124177 |
| C  | 4.100295  | -4.188277 | -3.828984 |
| H  | 3.295073  | -2.228166 | -4.152745 |
| C  | 4.106246  | -4.978929 | -1.544743 |
| H  | 3.300462  | -3.665669 | -0.075807 |
| C  | 4.394866  | -5.183143 | -2.895162 |
| H  | 4.322886  | -4.347013 | -4.876195 |
| H  | 4.328742  | -5.753350 | -0.821962 |
| H  | 4.844506  | -6.113117 | -3.218174 |
| N  | 2.517997  | -1.197665 | -0.198948 |
| N  | 0.550028  | -0.601617 | -0.918265 |
| C  | 0.847263  | 1.376873  | 3.409463  |
| C  | -0.286916 | 1.430516  | 4.335313  |
| C  | -0.069751 | 1.717563  | 5.693235  |
| C  | -1.604165 | 1.185094  | 3.911319  |
| C  | -1.134683 | 1.792793  | 6.587782  |
| C  | -2.666848 | 1.258515  | 4.804019  |
| C  | -2.438280 | 1.568680  | 6.146080  |
| H  | -0.944312 | 2.025175  | 7.638221  |
| H  | -3.681618 | 1.054773  | 4.459115  |
| H  | -3.274337 | 1.620655  | 6.846991  |
| C  | 0.831885  | 1.902800  | 2.095684  |
| C  | 1.993854  | 2.017635  | 1.300889  |
| H  | 2.934958  | 1.599826  | 1.668114  |
| H  | 1.898356  | 2.055422  | 0.217678  |
| H  | -1.780150 | 0.889077  | 2.873119  |
| H  | -0.110967 | 2.260261  | 1.668550  |
| P  | 2.358455  | 4.796272  | 0.307480  |
| O  | 2.070601  | 6.264500  | 0.944131  |
| O  | 3.357872  | 4.985137  | -0.796974 |
| O  | 0.901575  | 4.320419  | -0.263831 |
| O  | 2.647561  | 3.820776  | 1.463877  |
| Na | 5.007860  | 3.552346  | -1.213012 |
| H  | 1.835838  | 1.271695  | 3.881854  |
| H  | 0.951237  | 1.893782  | 6.043531  |
| C  | 1.081627  | 6.402817  | 1.950492  |
| H  | 1.331076  | 7.283935  | 2.552935  |
| H  | 0.086521  | 6.552412  | 1.504592  |
| H  | 1.048092  | 5.522854  | 2.610434  |
| C  | 0.405473  | 4.952738  | -1.430561 |
| H  | -0.655837 | 4.701626  | -1.521655 |
| H  | 0.496362  | 6.048284  | -1.370399 |
| H  | 0.931187  | 4.606655  | -2.332393 |
| C  | -0.803722 | -0.205430 | -0.831045 |
| C  | -1.808186 | -1.166435 | -0.698188 |
| C  | -1.155055 | 1.146500  | -0.974708 |
| C  | -3.154357 | -0.793153 | -0.694652 |
| C  | -2.508603 | 1.524607  | -0.998444 |
| C  | -3.505172 | 0.552056  | -0.848232 |
| H  | -4.550521 | 0.836983  | -0.881450 |
| H  | -0.382076 | 1.891087  | -1.117721 |
| H  | -1.547682 | -2.207520 | -0.626987 |
| C  | -2.902971 | 2.923371  | -1.273691 |
| C  | -3.225976 | 3.802624  | -0.200854 |

|   |           |           |           |
|---|-----------|-----------|-----------|
| C | -3.072026 | 3.356476  | -2.620213 |
| C | -3.705083 | 5.091963  | -0.496460 |
| C | -3.570750 | 4.650545  | -2.860953 |
| C | -3.873755 | 5.507770  | -1.810782 |
| H | -3.969506 | 5.779949  | 0.295525  |
| H | -3.740531 | 5.001382  | -3.869868 |
| H | -4.255208 | 6.499532  | -2.017448 |
| C | -4.196498 | -1.832498 | -0.604321 |
| C | -4.524004 | -2.605045 | -1.754405 |
| C | -4.850566 | -2.081745 | 0.634698  |
| C | -5.485237 | -3.624999 | -1.634460 |
| C | -5.814477 | -3.104610 | 0.698095  |
| C | -6.119964 | -3.869972 | -0.421870 |
| H | -5.754026 | -4.234519 | -2.487109 |
| H | -6.336874 | -3.315738 | 1.621771  |
| H | -6.861085 | -4.655783 | -0.351206 |
| C | -4.553138 | -1.265398 | 1.892996  |
| H | -3.740273 | -0.532963 | 1.713689  |
| C | -4.066830 | -2.159158 | 3.041575  |
| H | -3.212463 | -2.781199 | 2.705042  |
| H | -3.723518 | -1.532475 | 3.891912  |
| H | -4.874286 | -2.828506 | 3.405056  |
| C | -5.783369 | -0.451396 | 2.311144  |
| H | -6.116793 | 0.190351  | 1.467812  |
| H | -6.622211 | -1.114967 | 2.609593  |
| H | -5.535084 | 0.207216  | 3.169012  |
| C | -3.878190 | -2.351171 | -3.118535 |
| H | -3.161068 | -1.506567 | -3.075650 |
| C | -4.927163 | -1.948961 | -4.162424 |
| H | -4.426800 | -1.660245 | -5.111645 |
| H | -5.627634 | -2.783737 | -4.374787 |
| H | -5.507727 | -1.074295 | -3.798473 |
| C | -3.073752 | -3.570228 | -3.584657 |
| H | -2.555926 | -3.341095 | -4.540362 |
| H | -2.304480 | -3.828353 | -2.826193 |
| H | -3.730668 | -4.450637 | -3.745205 |
| C | -2.773098 | 2.447674  | -3.812652 |
| H | -2.290075 | 1.503830  | -3.487316 |
| C | -3.102614 | 3.382757  | 1.260517  |
| H | -2.654156 | 2.374939  | 1.337816  |
| C | -2.176856 | 4.326607  | 2.039894  |
| H | -1.203001 | 4.416544  | 1.517116  |
| H | -2.620491 | 5.338423  | 2.145125  |
| H | -1.989299 | 3.924700  | 3.057667  |
| C | -4.483177 | 3.297038  | 1.920590  |
| H | -4.976904 | 4.291232  | 1.949967  |
| H | -5.129100 | 2.591732  | 1.355673  |
| H | -4.387063 | 2.922341  | 2.960761  |
| C | -1.789003 | 3.106387  | -4.788435 |
| H | -2.221754 | 4.011759  | -5.261332 |
| H | -0.857092 | 3.388934  | -4.253631 |
| H | -1.530037 | 2.395958  | -5.600187 |
| C | -4.068632 | 2.045916  | -4.525642 |
| H | -4.760036 | 1.556851  | -3.806229 |
| H | -4.574257 | 2.931347  | -4.965981 |
| H | -3.847539 | 1.321361  | -5.338529 |
| H | 1.643869  | 1.130759  | -2.908467 |
| H | 1.260142  | 2.058948  | -5.158223 |
| C | 1.177061  | 0.512623  | -3.663951 |
| C | 0.957593  | 1.043623  | -4.937192 |
| C | 0.802930  | -0.811982 | -3.373466 |
| C | 0.339518  | 0.269569  | -5.922486 |
| H | 0.164408  | 0.685384  | -6.906200 |
| C | 0.172830  | -1.578898 | -4.368915 |
| C | -0.060915 | -1.037216 | -5.635573 |
| H | -0.126721 | -2.599964 | -4.169809 |
| H | -0.544860 | -1.634206 | -6.397631 |
| C | 0.192280  | -1.642877 | 3.239399  |
| H | -0.816178 | -1.209096 | 3.372572  |
| C | 0.931860  | -1.734002 | 4.560625  |
| H | 0.923168  | -0.794825 | 5.136393  |
| H | 0.512494  | -2.509823 | 5.228900  |
| H | 1.990149  | -2.010449 | 4.423691  |
| B | 0.084342  | -2.975915 | 2.488582  |
| O | -0.891690 | -3.315797 | 1.567663  |
| O | 0.930517  | -4.048038 | 2.735058  |
| C | 0.281676  | -5.234846 | 2.231434  |
| C | -0.642331 | -4.659418 | 1.103323  |
| C | 1.337466  | -6.212401 | 1.763416  |
| H | 2.033067  | -5.753981 | 1.049964  |
| H | 1.926180  | -6.569074 | 2.619191  |
| H | 0.879875  | -7.090465 | 1.284938  |
| C | -0.515128 | -5.824959 | 3.385852  |
| H | -1.282906 | -5.123764 | 3.743133  |
| H | -1.012107 | -6.763746 | 3.104117  |
| H | 0.159379  | -6.037493 | 4.226163  |
| C | -1.972975 | -5.364244 | 0.940639  |
| H | -1.831962 | -6.414729 | 0.646914  |

H -2.567629 -5.338944 1.861353  
 H -2.560616 -4.871593 0.153634  
 C 0.077631 -4.585984 -0.233052  
 H -0.581412 -4.190579 -1.015484  
 H 0.956151 -3.933428 -0.154446  
 H 0.410569 -5.575282 -0.573466

170

Figure\_S7\_imid-3\_modeC\_ts(AS)\_05 / electronic energy: -4442.742404258524 a.u. / lowest freq: -266.68 cm-1

C -0.551418 -2.898495 -2.224144  
 H -0.389119 -3.795760 -1.607682  
 C 0.721524 -2.047866 -2.395886  
 H 0.748771 -1.525723 -3.368475  
 C -0.748857 -0.934234 -0.948999  
 C -2.764470 -2.231718 -1.053636  
 C -3.763397 -1.371982 -1.516725  
 C -3.097020 -3.249116 -0.139363  
 C -5.082325 -1.515477 -1.093310  
 H -3.501314 -0.576377 -2.214892  
 C -4.425150 -3.394054 0.265939  
 C -5.416150 -2.535221 -0.205888  
 H -5.839458 -0.826315 -1.472874  
 H -4.663045 -4.181757 0.982338  
 H -6.447483 -2.662042 0.130218  
 S -1.882255 -4.368419 0.573454  
 O -2.556954 -4.981870 1.754423  
 O -0.739655 -3.510114 1.011535  
 O -1.545641 -5.335156 -0.488645  
 Cu -1.706802 0.645738 -0.240888  
 C -1.179142 -3.290266 -3.536410  
 C -1.255319 -4.644325 -3.906807  
 C -1.699653 -2.313543 -4.406612  
 C -1.844676 -5.013025 -5.119873  
 H -0.855083 -5.415627 -3.261232  
 C -2.289080 -2.687254 -5.617407  
 H -1.651993 -1.264213 -4.146144  
 C -2.362132 -4.035864 -5.973704  
 H -1.899506 -6.057449 -5.398446  
 H -2.689386 -1.930619 -6.279734  
 H -2.818379 -4.323666 -6.912002  
 N -1.425093 -1.971140 -1.465471  
 N 0.524413 -1.021338 -1.348127  
 C -2.511434 1.816825 1.236575  
 C -2.116013 3.225647 1.201569  
 C -3.070554 4.237874 1.389640  
 C -0.786153 3.608591 0.955188  
 C -2.710765 5.581598 1.337693  
 C -0.425687 4.949599 0.898519  
 C -1.386788 5.944479 1.090214  
 H -3.471470 6.351990 1.487286  
 H 0.612871 5.221532 0.698907  
 H -1.103829 6.998376 1.042293  
 C -1.710016 0.781448 1.794923  
 C -2.180407 -0.542870 1.920329  
 H -3.146829 -0.798867 1.478399  
 H -1.473151 -1.372637 1.983283  
 H -0.034938 2.835603 0.763213  
 H -0.709912 1.014215 2.176241  
 P -1.834018 -1.217418 4.728568  
 O -2.520829 -1.223265 6.202384  
 O -1.074452 -2.504641 4.584918  
 O -0.815022 0.060650 4.771719  
 O -2.908813 -0.809369 3.707743  
 Na -0.953523 -4.319951 3.356959  
 H -3.591499 1.620713 1.183870  
 H -4.108600 3.959495 1.594179  
 C -3.289195 -0.104258 6.612994  
 H -3.625790 -0.292712 7.638705  
 H -2.691342 0.820308 6.600005  
 H -4.167867 0.036968 5.967427  
 C 0.346448 -0.044143 5.573745  
 H 0.808227 0.948205 5.622563  
 H 0.104939 -0.364226 6.599558  
 H 1.065398 -0.758760 5.147465  
 C 1.546533 -0.199844 -0.814852  
 C 2.466214 0.427548 -1.666276  
 C 1.718728 -0.105701 0.577903  
 C 3.542154 1.146037 -1.133053  
 C 2.830196 0.565114 1.112412  
 C 3.730983 1.201709 0.251120  
 H 4.595253 1.715581 0.655546  
 H 1.040898 -0.629021 1.240776  
 H 2.345631 0.356512 -2.740466  
 C 3.131547 0.505505 2.562252  
 C 3.057291 1.673380 3.371439  
 C 3.597086 -0.704225 3.151564  
 C 3.484137 1.588213 4.713173  
 C 3.955874 -0.691767 4.515307  
 C 3.904812 0.431913 5.242072

|   |           |           |           |
|---|-----------|-----------|-----------|
| H | 3.465303  | 2.462509  | 5.350499  |
| H | 4.296226  | -1.597590 | 4.999843  |
| H | 4.205671  | 0.403882  | 6.282215  |
| C | 4.496219  | 1.822689  | -2.024914 |
| C | 5.690633  | 1.190051  | -2.441304 |
| C | 4.258490  | 3.235048  | -2.441777 |
| C | 6.596976  | 1.928447  | -3.230955 |
| C | 5.236341  | 3.847498  | -3.243378 |
| C | 6.352030  | 3.195774  | -3.605988 |
| H | 7.527026  | 1.476694  | -3.550558 |
| H | 5.106895  | 4.870440  | -3.572877 |
| H | 7.083736  | 3.711540  | -4.215904 |
| C | 3.025577  | 4.012247  | -1.999157 |
| H | 2.368359  | 3.374500  | -1.372825 |
| C | 2.185600  | 4.450324  | -3.203938 |
| H | 1.917299  | 3.565824  | -3.820545 |
| H | 1.245111  | 4.929214  | -2.856668 |
| H | 2.737134  | 5.176951  | -3.836922 |
| C | 3.417877  | 5.213866  | -1.131960 |
| H | 4.005860  | 4.870636  | -0.254033 |
| H | 4.023505  | 5.945329  | -1.707302 |
| H | 2.508068  | 5.730072  | -0.760665 |
| C | 6.030956  | -0.243711 | -2.039153 |
| H | 5.188743  | -0.712224 | -1.488318 |
| C | 7.236317  | -0.271293 | -1.093386 |
| H | 7.422788  | -1.309491 | -0.744178 |
| H | 8.151365  | 0.102755  | -1.599619 |
| H | 7.032933  | 0.361251  | -0.202679 |
| C | 6.274431  | -1.128787 | -3.267804 |
| H | 6.436119  | -2.180304 | -2.949426 |
| H | 5.389491  | -1.097738 | -3.938861 |
| H | 7.169888  | -0.801586 | -3.835811 |
| C | 3.734246  | -2.006818 | 2.365039  |
| H | 3.511569  | -1.854607 | 1.292031  |
| C | 2.520450  | 3.002997  | 2.848520  |
| H | 2.158857  | 2.899761  | 1.805858  |
| C | 1.316666  | 3.476835  | 3.676342  |
| H | 0.508863  | 2.715575  | 3.642790  |
| H | 1.592923  | 3.659834  | 4.735123  |
| H | 0.919775  | 4.427444  | 3.265683  |
| C | 3.621407  | 4.069311  | 2.826362  |
| H | 3.969696  | 4.308306  | 3.853345  |
| H | 4.486279  | 3.712347  | 2.227985  |
| H | 3.237932  | 5.000885  | 2.357663  |
| C | 2.734496  | -3.049543 | 2.878358  |
| H | 2.936742  | -3.312864 | 3.937921  |
| H | 1.700107  | -2.650236 | 2.798259  |
| H | 2.795307  | -3.975370 | 2.269689  |
| C | 5.171663  | -2.542566 | 2.406696  |
| H | 5.878888  | -1.756868 | 2.064005  |
| H | 5.457254  | -2.865904 | 3.429276  |
| H | 5.271804  | -3.415444 | 1.727332  |
| H | 1.658663  | -3.303521 | -0.130605 |
| H | 3.722534  | -4.636200 | 0.109528  |
| C | 2.310181  | -3.432897 | -0.984164 |
| C | 3.480808  | -4.183688 | -0.842193 |
| C | 1.987265  | -2.847729 | -2.222027 |
| C | 4.338177  | -4.357685 | -1.930295 |
| H | 5.244109  | -4.939009 | -1.818102 |
| C | 2.858960  | -3.027821 | -3.310378 |
| C | 4.024589  | -3.784619 | -3.164362 |
| H | 2.634066  | -2.590291 | -4.275037 |
| H | 4.687935  | -3.922944 | -4.008287 |
| C | -1.938567 | 1.615490  | -2.024956 |
| H | -1.913487 | 0.748804  | -2.706333 |
| C | -0.752673 | 2.522161  | -2.268268 |
| H | 0.220465  | 2.023155  | -2.134846 |
| H | -0.741879 | 2.926115  | -3.297743 |
| H | -0.755923 | 3.400608  | -1.607025 |
| B | -3.318103 | 2.280176  | -2.023788 |
| O | -4.515541 | 1.607077  | -2.238145 |
| O | -3.531929 | 3.637109  | -1.850861 |
| C | -4.896892 | 3.914016  | -2.230715 |
| C | -5.591509 | 2.535728  | -1.981518 |
| C | -5.432290 | 5.056032  | -1.394472 |
| H | -5.351772 | 4.855623  | -0.319546 |
| H | -4.865929 | 5.974405  | -1.602775 |
| H | -6.488267 | 5.252431  | -1.631221 |
| C | -4.884109 | 4.298270  | -3.702870 |
| H | -4.519858 | 3.471218  | -4.328654 |
| H | -5.882855 | 4.584939  | -4.060666 |
| H | -4.212211 | 5.154239  | -3.851755 |
| C | -6.743001 | 2.225715  | -2.913297 |
| H | -7.541444 | 2.975409  | -2.815131 |
| H | -6.423548 | 2.198330  | -3.962170 |
| H | -7.178163 | 1.246197  | -2.670643 |
| C | -6.013556 | 2.359792  | -0.531705 |
| H | -6.272236 | 1.309337  | -0.340071 |

H -5.196443 2.635687 0.149401  
H -6.887851 2.976188 -0.280026  
170

Figure\_S7\_imid-3\_modeC ts(AS)\_06 / electronic energy: -4442.738698912161 a.u. / lowest freq: -278.31 cm-1

C 0.637612 -1.434755 3.210247  
H 0.643953 -2.524507 3.062346  
C -0.746274 -0.800907 2.962572  
H -0.931474 0.070439 3.614503  
C 0.691723 -0.211940 1.202412  
C 2.840239 -1.027905 1.907742  
C 3.674396 0.092604 1.934119  
C 3.387779 -2.286987 1.595089  
C 5.034591 -0.019149 1.656937  
H 3.250482 1.066384 2.179014  
C 4.757095 -2.391609 1.342839  
C 5.580878 -1.267657 1.371190  
H 5.656057 0.878456 1.680474  
H 5.161290 -3.375490 1.098734  
H 6.648308 -1.372138 1.164255  
S 2.396611 -3.781220 1.437532  
O 3.267848 -4.759185 0.726067  
O 1.236404 -3.386855 0.581283  
O 2.036307 -4.196463 2.806507  
Cu 1.455164 1.053651 -0.113016  
C 1.202882 -1.106116 4.568050  
C 1.436347 -2.129353 5.503609  
C 1.511103 0.222140 4.918237  
C 1.971595 -1.830038 6.760041  
H 1.201255 -3.158571 5.264966  
C 2.047102 0.516268 6.174951  
H 1.339121 1.028648 4.218052  
C 2.277885 -0.508933 7.095039  
H 2.148555 -2.623318 7.474777  
H 2.283705 1.539793 6.435371  
H 2.692701 -0.279608 8.068036  
N 1.447406 -0.819983 2.127959  
N -0.589446 -0.293491 1.581111  
C 2.145839 1.646681 -1.943948  
C 1.528242 2.866022 -2.470365  
C 2.309881 3.859020 -3.081792  
C 0.143817 3.085475 -2.366036  
C 1.731008 5.028923 -3.566636  
C -0.435483 4.252333 -2.849283  
C 0.356085 5.232360 -3.451389  
H 2.360043 5.789380 -4.036357  
H -1.513023 4.398879 -2.754236  
H -0.098510 6.151936 -3.826766  
C 1.533603 0.365073 -2.034706  
C 2.192842 -0.831207 -1.677752  
H 3.153473 -0.770131 -1.156118  
H 1.590543 -1.709447 -1.436927  
H -0.477516 2.342955 -1.854587  
H 0.529721 0.282173 -2.465384  
P 2.732081 -3.066265 -3.419596  
O 3.758675 -3.858678 -2.403579  
O 1.404240 -3.697495 -3.113336  
O 3.298912 -3.383945 -4.903645  
O 2.961361 -1.551005 -3.280287  
Na 1.842794 -4.952721 -1.194821  
H 3.239422 1.663551 -1.836737  
H 3.387551 3.701185 -3.184815  
C 5.116584 -3.466115 -2.302865  
H 5.560040 -4.011624 -1.461703  
H 5.672085 -3.712438 -3.221175  
H 5.206173 -2.384962 -2.117550  
C 3.186663 -4.704700 -5.411110  
H 3.530683 -4.687494 -6.450886  
H 3.816148 -5.407867 -4.843473  
H 2.145928 -5.058121 -5.384962  
C -1.658980 0.020587 0.707382  
C -2.756752 0.760394 1.167638  
C -1.684925 -0.514938 -0.592083  
C -3.865102 0.966203 0.337500  
C -2.812440 -0.347441 -1.409889  
C -3.896406 0.404502 -0.943436  
H -4.777599 0.524640 -1.562427  
H -0.867029 -1.136195 -0.933021  
H -2.752471 1.167799 2.171389  
C -2.918098 -1.062086 -2.703575  
C -2.901098 -0.351387 -3.936683  
C -3.109608 -2.472909 -2.730910  
C -3.088405 -1.077860 -5.131267  
C -3.246119 -3.107118 -3.982767  
C -3.240760 -2.408577 -5.125385  
H -3.107611 -0.568033 -6.085452  
H -3.378277 -4.179769 -4.040791  
H -3.368076 -2.931005 -6.065722  
C -5.020824 1.735605 0.824340

|   |           |           |           |
|---|-----------|-----------|-----------|
| C | -6.174363 | 1.089933  | 1.328184  |
| C | -5.023755 | 3.224541  | 0.733631  |
| C | -7.273560 | 1.887563  | 1.709230  |
| C | -6.176578 | 3.897930  | 1.171781  |
| C | -7.245436 | 3.229052  | 1.631283  |
| H | -8.176461 | 1.420467  | 2.080543  |
| H | -6.223405 | 4.978635  | 1.132259  |
| H | -8.117127 | 3.789700  | 1.946298  |
| C | -3.843917 | 4.003289  | 0.166453  |
| H | -3.037414 | 3.310754  | -0.151047 |
| C | -3.233727 | 4.926801  | 1.226327  |
| H | -2.936602 | 4.334805  | 2.118507  |
| H | -2.325318 | 5.421919  | 0.821356  |
| H | -3.953832 | 5.712544  | 1.537867  |
| C | -4.253010 | 4.790386  | -1.084197 |
| H | -4.651269 | 4.095855  | -1.854924 |
| H | -5.026850 | 5.550653  | -0.848335 |
| H | -3.372133 | 5.314716  | -1.509860 |
| C | -6.261197 | -0.429689 | 1.458813  |
| H | -5.289433 | -0.905340 | 1.210704  |
| C | -7.289839 | -1.002528 | 0.478268  |
| H | -7.287966 | -2.112445 | 0.529748  |
| H | -8.312374 | -0.637581 | 0.712288  |
| H | -7.030058 | -0.704596 | -0.560156 |
| C | -6.578589 | -0.851741 | 2.898917  |
| H | -6.516595 | -1.956864 | 2.991342  |
| H | -5.842559 | -0.399779 | 3.597539  |
| H | -7.599791 | -0.538214 | 3.199987  |
| C | -3.200200 | -3.319400 | -1.461476 |
| H | -3.141909 | -2.690374 | -0.552851 |
| C | -2.690092 | 1.158827  | -4.013833 |
| H | -2.455231 | 1.574178  | -3.013727 |
| C | -1.499144 | 1.512787  | -4.917623 |
| H | -0.580509 | 1.004641  | -4.556606 |
| H | -1.681042 | 1.217460  | -5.971351 |
| H | -1.322712 | 2.607786  | -4.905197 |
| C | -3.963813 | 1.863717  | -4.493498 |
| H | -4.216552 | 1.568959  | -5.534056 |
| H | -4.816500 | 1.604946  | -3.830738 |
| H | -3.823627 | 2.965514  | -4.460666 |
| C | -2.031270 | -4.308725 | -1.385794 |
| H | -2.064511 | -5.037300 | -2.222804 |
| H | -1.068744 | -3.756573 | -1.427673 |
| H | -2.064219 | -4.872908 | -0.430926 |
| C | -4.549312 | -4.043697 | -1.367160 |
| H | -5.379592 | -3.309273 | -1.446211 |
| H | -4.660459 | -4.802850 | -2.169320 |
| H | -4.636844 | -4.558014 | -0.386481 |
| H | -1.286320 | -3.038819 | 1.448895  |
| H | -3.137893 | -4.645050 | 1.738586  |
| C | -1.999064 | -2.889094 | 2.248197  |
| C | -3.048971 | -3.798613 | 2.405420  |
| C | -1.876848 | -1.787542 | 3.115028  |
| C | -3.983477 | -3.620263 | 3.427025  |
| H | -4.795938 | -4.325170 | 3.546491  |
| C | -2.825865 | -1.616282 | 4.138316  |
| C | -3.869565 | -2.532411 | 4.294937  |
| H | -2.756429 | -0.777729 | 4.819869  |
| H | -4.594517 | -2.395387 | 5.086791  |
| C | 1.445178  | 2.696132  | 1.109944  |
| H | 1.520584  | 2.192994  | 2.088048  |
| C | 0.121723  | 3.417345  | 0.984167  |
| H | -0.753013 | 2.752393  | 1.071283  |
| H | -0.008672 | 4.185482  | 1.768902  |
| H | 0.024202  | 3.952613  | 0.028750  |
| B | 2.707932  | 3.511569  | 0.817842  |
| O | 3.977912  | 3.170114  | 1.269351  |
| O | 2.731931  | 4.705740  | 0.117169  |
| C | 4.019946  | 5.316564  | 0.345139  |
| C | 4.919659  | 4.078224  | 0.659133  |
| C | 4.427626  | 6.103417  | -0.881590 |
| H | 4.423319  | 5.485679  | -1.787324 |
| H | 3.729495  | 6.935984  | -1.044048 |
| H | 5.433835  | 6.529884  | -0.757739 |
| C | 3.866946  | 6.243790  | 1.542180  |
| H | 3.591978  | 5.684984  | 2.447985  |
| H | 4.789237  | 6.803893  | 1.750279  |
| H | 3.068401  | 6.970330  | 1.340941  |
| C | 6.050642  | 4.345752  | 1.628032  |
| H | 6.727955  | 5.119210  | 1.237574  |
| H | 5.681372  | 4.673781  | 2.607278  |
| H | 6.645263  | 3.434813  | 1.783610  |
| C | 5.442686  | 3.413670  | -0.604295 |
| H | 5.863801  | 2.427791  | -0.363326 |
| H | 4.633359  | 3.267355  | -1.333282 |
| H | 6.230414  | 4.008833  | -1.086906 |

170

Figure\_S7\_imid-3\_modeC\_prod(AS) / electronic energy: -4442.751813336476 a.u. / lowest freq: 17.37 cm<sup>-1</sup>

|    |           |           |           |
|----|-----------|-----------|-----------|
| C  | -0.651741 | -1.916313 | -3.113639 |
| H  | -0.510903 | -2.983232 | -2.882466 |
| C  | 0.643109  | -1.090914 | -2.980879 |
| H  | 0.690353  | -0.259560 | -3.705045 |
| C  | -0.789420 | -0.564885 | -1.207221 |
| C  | -2.838602 | -1.709968 | -1.747854 |
| C  | -3.832387 | -0.740986 | -1.887392 |
| C  | -3.174412 | -2.987079 | -1.264927 |
| C  | -5.153624 | -1.021661 | -1.547431 |
| H  | -3.567935 | 0.245651  | -2.266847 |
| C  | -4.504139 | -3.264058 | -0.944917 |
| C  | -5.491724 | -2.289540 | -1.082896 |
| H  | -5.908252 | -0.240392 | -1.658368 |
| H  | -4.745461 | -4.255500 | -0.557544 |
| H  | -6.524524 | -2.524694 | -0.817753 |
| S  | -1.949596 | -4.274524 | -0.985845 |
| O  | -2.621223 | -5.267712 | -0.100232 |
| O  | -0.832144 | -3.592921 | -0.267929 |
| O  | -1.594496 | -4.803334 | -2.316229 |
| Cu | -1.675231 | 0.592920  | 0.112605  |
| C  | -1.309430 | -1.771843 | -4.461590 |
| C  | -1.458057 | -2.891241 | -5.299087 |
| C  | -1.792756 | -0.523572 | -4.898047 |
| C  | -2.079603 | -2.764409 | -6.545028 |
| H  | -1.090791 | -3.861985 | -4.991651 |
| C  | -2.414627 | -0.402140 | -6.143679 |
| H  | -1.691305 | 0.353925  | -4.273153 |
| C  | -2.558333 | -1.521575 | -6.966546 |
| H  | -2.190102 | -3.630743 | -7.184319 |
| H  | -2.785661 | 0.560536  | -6.470800 |
| H  | -3.039876 | -1.425900 | -7.931095 |
| N  | -1.494913 | -1.329917 | -2.042922 |
| N  | 0.474937  | -0.495794 | -1.633644 |
| C  | -2.459917 | 1.449266  | 1.858524  |
| C  | -2.096010 | 2.808950  | 2.252088  |
| C  | -3.074795 | 3.717723  | 2.685085  |
| C  | -0.760804 | 3.246301  | 2.195104  |
| C  | -2.731498 | 5.016082  | 3.049277  |
| C  | -0.418923 | 4.547107  | 2.544924  |
| C  | -1.404132 | 5.438061  | 2.974299  |
| H  | -3.507383 | 5.706137  | 3.389396  |
| H  | 0.621474  | 4.871343  | 2.476446  |
| H  | -1.136473 | 6.461038  | 3.247654  |
| C  | -1.650184 | 0.318594  | 2.169877  |
| C  | -1.906273 | -0.935607 | 1.643134  |
| H  | -2.897858 | -1.193243 | 1.250894  |
| H  | -1.212559 | -1.765781 | 1.790764  |
| H  | 0.010655  | 2.561966  | 1.828565  |
| H  | -0.684773 | 0.484276  | 2.661517  |
| P  | -1.750746 | -2.872895 | 4.281486  |
| O  | -1.789594 | -3.723109 | 5.698088  |
| O  | -0.706525 | -3.580217 | 3.442080  |
| O  | -1.135922 | -1.423185 | 4.790161  |
| O  | -3.136150 | -2.593859 | 3.775029  |
| Na | -1.190430 | -4.905271 | 1.756324  |
| H  | -3.527698 | 1.253717  | 1.681097  |
| H  | -4.115206 | 3.389254  | 2.755176  |
| C  | -2.671896 | -3.280283 | 6.704342  |
| H  | -2.715593 | -4.048213 | 7.487407  |
| H  | -2.327514 | -2.337063 | 7.161677  |
| H  | -3.688011 | -3.117554 | 6.311088  |
| C  | 0.218098  | -1.402079 | 5.176716  |
| H  | 0.425770  | -0.437631 | 5.658285  |
| H  | 0.456277  | -2.202765 | 5.896616  |
| H  | 0.886202  | -1.521885 | 4.309052  |
| C  | 1.521263  | 0.085172  | -0.873213 |
| C  | 2.462544  | 0.922259  | -1.490198 |
| C  | 1.696197  | -0.268628 | 0.476827  |
| C  | 3.564003  | 1.397919  | -0.768953 |
| C  | 2.835528  | 0.153368  | 1.182122  |
| C  | 3.761351  | 0.994249  | 0.554759  |
| H  | 4.647266  | 1.317591  | 1.087948  |
| H  | 0.999116  | -0.947690 | 0.949425  |
| H  | 2.337533  | 1.206835  | -2.527649 |
| C  | 3.134667  | -0.380554 | 2.533134  |
| C  | 3.123557  | 0.481072  | 3.670856  |
| C  | 3.516868  | -1.747584 | 2.686621  |
| C  | 3.503872  | -0.039648 | 4.922445  |
| C  | 3.835566  | -2.226114 | 3.970917  |
| C  | 3.838838  | -1.378698 | 5.070144  |
| H  | 3.534057  | 0.590956  | 5.800657  |
| H  | 4.108958  | -3.261582 | 4.124436  |
| H  | 4.108728  | -1.762383 | 6.045695  |
| C  | 4.529937  | 2.313885  | -1.401913 |
| C  | 5.709603  | 1.796783  | -2.006268 |
| C  | 4.309517  | 3.718824  | -1.349296 |
| C  | 6.649866  | 2.698907  | -2.537445 |
| C  | 5.268105  | 4.577092  | -1.918189 |

|   |           |           |           |
|---|-----------|-----------|-----------|
| C | 6.424423  | 4.070603  | -2.501119 |
| H | 7.569544  | 2.342642  | -2.981967 |
| H | 5.131136  | 5.650230  | -1.897739 |
| H | 7.157081  | 4.748052  | -2.920758 |
| C | 3.080790  | 4.325952  | -0.669692 |
| H | 2.416264  | 3.538363  | -0.260481 |
| C | 2.231024  | 5.121739  | -1.667437 |
| H | 1.945132  | 4.472842  | -2.522848 |
| H | 1.300368  | 5.476610  | -1.175055 |
| H | 2.781248  | 6.005339  | -2.053369 |
| C | 3.487059  | 5.195177  | 0.526303  |
| H | 4.103313  | 4.600142  | 1.233423  |
| H | 4.068782  | 6.083292  | 0.201584  |
| H | 2.582691  | 5.547622  | 1.065697  |
| C | 6.000128  | 0.296629  | -2.068494 |
| H | 5.136620  | -0.294306 | -1.699176 |
| C | 7.187458  | -0.064227 | -1.169363 |
| H | 7.338220  | -1.165044 | -1.160806 |
| H | 8.121466  | 0.419406  | -1.526083 |
| H | 6.986671  | 0.264793  | -0.127168 |
| C | 6.239171  | -0.171822 | -3.509619 |
| H | 6.352783  | -1.276229 | -3.533340 |
| H | 5.372896  | 0.105996  | -4.147348 |
| H | 7.160315  | 0.274922  | -3.937736 |
| C | 3.627847  | -2.711779 | 1.503772  |
| H | 3.429423  | -2.199996 | 0.543402  |
| C | 2.720601  | 1.953235  | 3.585099  |
| H | 2.358422  | 2.207658  | 2.568601  |
| C | 1.562378  | 2.275291  | 4.540907  |
| H | 0.685727  | 1.637948  | 4.305492  |
| H | 1.846058  | 2.117691  | 5.601593  |
| H | 1.262208  | 3.337247  | 4.430867  |
| C | 3.921036  | 2.864730  | 3.866993  |
| H | 4.283663  | 2.739195  | 4.909119  |
| H | 4.752196  | 2.631255  | 3.168904  |
| H | 3.634007  | 3.927843  | 3.719553  |
| C | 2.593635  | -3.837824 | 1.621315  |
| H | 2.772217  | -4.456985 | 2.525302  |
| H | 1.571465  | -3.406748 | 1.676792  |
| H | 2.640986  | -4.498655 | 0.731014  |
| C | 5.049352  | -3.274494 | 1.370469  |
| H | 5.782653  | -2.441428 | 1.313595  |
| H | 5.310893  | -3.928796 | 2.228057  |
| H | 5.135609  | -3.872862 | 0.438629  |
| H | 1.557406  | -3.061023 | -1.287737 |
| H | 3.581833  | -4.448859 | -1.542057 |
| C | 2.198033  | -2.912856 | -2.145736 |
| C | 3.346011  | -3.698293 | -2.283969 |
| C | 1.884513  | -1.936285 | -3.108479 |
| C | 4.187652  | -3.521211 | -3.383756 |
| H | 5.075607  | -4.130775 | -3.489578 |
| C | 2.741023  | -1.764244 | -4.209951 |
| C | 3.882001  | -2.559156 | -4.348628 |
| H | 2.522589  | -1.021742 | -4.967274 |
| H | 4.533574  | -2.424454 | -5.202260 |
| C | -1.899656 | 2.139572  | -1.198768 |
| H | -1.891804 | 1.553680  | -2.131330 |
| C | -0.722818 | 3.080003  | -1.156379 |
| H | 0.246497  | 2.582957  | -1.302407 |
| H | -0.797998 | 3.835420  | -1.958841 |
| H | -0.669829 | 3.653297  | -0.220721 |
| B | -3.287122 | 2.792147  | -0.994778 |
| O | -4.474972 | 2.226591  | -1.411521 |
| O | -3.472300 | 4.046129  | -0.458859 |
| C | -4.821602 | 4.459860  | -0.795441 |
| C | -5.553073 | 3.088095  | -0.968879 |
| C | -5.370119 | 5.336586  | 0.307473  |
| H | -5.332721 | 4.844615  | 1.286069  |
| H | -4.785967 | 6.264210  | 0.378056  |
| H | -6.413941 | 5.613102  | 0.100335  |
| C | -4.728594 | 5.240186  | -2.097207 |
| H | -4.346856 | 4.614634  | -2.916595 |
| H | -5.703317 | 5.645488  | -2.401402 |
| H | -4.037246 | 6.083456  | -1.968492 |
| C | -6.645926 | 3.082160  | -2.015100 |
| H | -7.432161 | 3.808523  | -1.763969 |
| H | -6.259354 | 3.325235  | -3.012145 |
| H | -7.117159 | 2.091214  | -2.070727 |
| C | -6.066706 | 2.526503  | 0.345622  |
| H | -6.362278 | 1.476866  | 0.214031  |
| H | -5.290918 | 2.562409  | 1.122662  |
| H | -6.940401 | 3.081352  | 0.713640  |

170

Figure\_S7\_imid-3\_modeD\_ed(AS) / electronic energy: -4442.757427819045 a.u. / lowest freq: 12.40 cm<sup>-1</sup>

|   |           |           |          |
|---|-----------|-----------|----------|
| C | 0.410647  | 0.018323  | 3.272467 |
| H | 0.684755  | -0.964074 | 3.678020 |
| C | -1.053287 | 0.072252  | 2.782674 |
| H | -1.587192 | 0.965074  | 3.148267 |



|    |           |           |           |
|----|-----------|-----------|-----------|
| C  | 0.391114  | 0.324174  | 0.923065  |
| C  | 2.582071  | 0.288392  | 1.898302  |
| C  | 3.128978  | 1.425395  | 1.290936  |
| C  | 3.438246  | -0.770016 | 2.257418  |
| C  | 4.493306  | 1.527254  | 1.042597  |
| H  | 2.458229  | 2.232489  | 0.986125  |
| C  | 4.808681  | -0.656980 | 2.005814  |
| C  | 5.339751  | 0.481588  | 1.405806  |
| H  | 4.880689  | 2.422514  | 0.551279  |
| H  | 5.449215  | -1.501507 | 2.266769  |
| H  | 6.413682  | 0.544356  | 1.214326  |
| S  | 2.878422  | -2.289783 | 3.036131  |
| O  | 3.970039  | -3.282975 | 2.822377  |
| O  | 1.645045  | -2.713434 | 2.303508  |
| O  | 2.649723  | -1.949878 | 4.453068  |
| Cu | 1.169089  | 0.790239  | -0.864214 |
| C  | 0.720730  | 1.087332  | 4.290221  |
| C  | 1.063585  | 0.734226  | 5.607390  |
| C  | 0.654032  | 2.449974  | 3.944030  |
| C  | 1.349714  | 1.723026  | 6.553099  |
| H  | 1.099803  | -0.304374 | 5.908636  |
| C  | 0.938472  | 3.435035  | 4.894692  |
| H  | 0.378019  | 2.746652  | 2.939881  |
| C  | 1.289291  | 3.071936  | 6.196680  |
| H  | 1.613816  | 1.443025  | 7.564679  |
| H  | 0.883652  | 4.481094  | 4.625363  |
| H  | 1.508648  | 3.836099  | 6.931075  |
| N  | 1.169106  | 0.237878  | 2.018861  |
| N  | -0.886377 | 0.195783  | 1.316222  |
| C  | 2.317004  | 0.182187  | -2.452669 |
| C  | 3.264120  | 1.199569  | -2.912139 |
| C  | 2.919175  | 2.026046  | -3.998514 |
| C  | 4.536393  | 1.371036  | -2.338024 |
| C  | 3.795142  | 2.997086  | -4.472369 |
| C  | 5.411757  | 2.343884  | -2.809426 |
| C  | 5.046502  | 3.167244  | -3.876454 |
| H  | 3.501603  | 3.625791  | -5.317197 |
| H  | 6.394910  | 2.456387  | -2.343177 |
| H  | 5.736255  | 3.929176  | -4.248124 |
| C  | 2.483618  | -0.713276 | -1.377093 |
| C  | 1.880880  | -2.066359 | -1.404917 |
| H  | 1.680180  | -2.462106 | -0.396741 |
| H  | 0.954292  | -2.090324 | -1.991559 |
| H  | 4.846388  | 0.726315  | -1.512245 |
| H  | 3.357959  | -0.606247 | -0.720480 |
| P  | 3.684463  | -4.011115 | -1.302938 |
| O  | 4.856467  | -3.138475 | -0.626382 |
| O  | 3.049319  | -4.870172 | -0.265925 |
| O  | 4.335985  | -4.775769 | -2.552665 |
| O  | 2.751340  | -3.018971 | -2.120810 |
| Na | 2.498872  | -4.927057 | 1.891384  |
| H  | 1.554373  | -0.092486 | -3.195065 |
| H  | 1.944424  | 1.891687  | -4.477169 |
| C  | 5.667310  | -2.284314 | -1.431176 |
| H  | 6.142000  | -1.560241 | -0.759145 |
| H  | 6.446591  | -2.860125 | -1.950145 |
| H  | 5.064383  | -1.742629 | -2.175746 |
| C  | 5.147562  | -5.924423 | -2.314922 |
| H  | 5.541764  | -6.242841 | -3.284616 |
| H  | 5.989296  | -5.689707 | -1.647042 |
| H  | 4.557356  | -6.740786 | -1.877552 |
| C  | -1.958469 | 0.050366  | 0.396768  |
| C  | -3.231681 | 0.566223  | 0.689674  |
| C  | -1.780504 | -0.695105 | -0.778093 |
| C  | -4.306508 | 0.330659  | -0.178965 |
| C  | -2.855273 | -0.947552 | -1.637065 |
| C  | -4.120949 | -0.437917 | -1.333232 |
| H  | -4.956198 | -0.631655 | -1.996507 |
| H  | -0.815570 | -1.119076 | -1.001045 |
| H  | -3.390061 | 1.151485  | 1.586462  |
| C  | -2.654874 | -1.791394 | -2.832365 |
| C  | -2.560491 | -1.194854 | -4.122444 |
| C  | -2.505172 | -3.200425 | -2.685293 |
| C  | -2.286559 | -2.016444 | -5.231099 |
| C  | -2.234420 | -3.976647 | -3.826921 |
| C  | -2.123198 | -3.388819 | -5.081683 |
| H  | -2.192186 | -1.593764 | -6.222687 |
| H  | -2.108095 | -5.048493 | -3.749850 |
| H  | -1.911817 | -4.003354 | -5.947407 |
| C  | -5.634213 | 0.902241  | 0.108332  |
| C  | -6.581782 | 0.155761  | 0.862025  |
| C  | -5.982918 | 2.177022  | -0.418887 |
| C  | -7.864133 | 0.698437  | 1.065172  |
| C  | -7.272781 | 2.682136  | -0.175123 |
| C  | -8.200372 | 1.948692  | 0.556829  |
| H  | -8.616079 | 0.150174  | 1.617009  |
| H  | -7.570801 | 3.647329  | -0.563072 |
| H  | -9.191396 | 2.349999  | 0.726032  |

|   |           |           |           |
|---|-----------|-----------|-----------|
| C | -5.007033 | 3.004259  | -1.256561 |
| H | -4.032761 | 2.488824  | -1.358965 |
| C | -4.700991 | 4.349952  | -0.588684 |
| H | -4.324490 | 4.183001  | 0.443305  |
| H | -3.914323 | 4.887228  | -1.160551 |
| H | -5.604160 | 4.994028  | -0.543944 |
| C | -5.530730 | 3.198548  | -2.684226 |
| H | -5.746333 | 2.210856  | -3.145494 |
| H | -6.456687 | 3.811165  | -2.694303 |
| H | -4.762883 | 3.708733  | -3.304484 |
| C | -6.259473 | -1.226282 | 1.431989  |
| H | -5.198870 | -1.497483 | 1.252084  |
| C | -7.100903 | -2.308499 | 0.746493  |
| H | -6.797103 | -3.313844 | 1.109232  |
| H | -8.182581 | -2.168554 | 0.955562  |
| H | -6.938496 | -2.274326 | -0.352302 |
| C | -6.447624 | -1.263150 | 2.953779  |
| H | -6.128573 | -2.250189 | 3.350120  |
| H | -5.825675 | -0.476247 | 3.431651  |
| H | -7.508940 | -1.106487 | 3.237779  |
| C | -2.643368 | -3.900361 | -1.331093 |
| H | -2.890930 | -3.178501 | -0.526981 |
| C | -2.722974 | 0.309512  | -4.342369 |
| H | -2.975087 | 0.826231  | -3.398092 |
| C | -1.415585 | 0.938385  | -4.837870 |
| H | -0.594355 | 0.709422  | -4.126836 |
| H | -1.138981 | 0.555328  | -5.842642 |
| H | -1.522164 | 2.042737  | -4.896581 |
| C | -3.882315 | 0.613951  | -5.299180 |
| H | -3.671731 | 0.241989  | -6.323657 |
| H | -4.815327 | 0.139218  | -4.926738 |
| H | -4.050802 | 1.710895  | -5.353584 |
| C | -1.326697 | -4.569856 | -0.918442 |
| H | -1.035958 | -5.366903 | -1.634371 |
| H | -0.516083 | -3.813696 | -0.872793 |
| H | -1.428225 | -5.025112 | 0.088952  |
| C | -3.796459 | -4.911473 | -1.343391 |
| H | -4.737023 | -4.409624 | -1.656913 |
| H | -3.588867 | -5.754654 | -2.035112 |
| H | -3.949291 | -5.324786 | -0.323291 |
| H | -0.926056 | -2.471508 | 1.710040  |
| H | -2.227889 | -4.453661 | 2.377910  |
| C | -1.638031 | -2.387687 | 2.520361  |
| C | -2.377062 | -3.513947 | 2.892506  |
| C | -1.835226 | -1.157966 | 3.177416  |
| C | -3.307884 | -3.429313 | 3.929920  |
| H | -3.878710 | -4.302663 | 4.217416  |
| C | -2.775868 | -1.084681 | 4.219292  |
| C | -3.502581 | -2.217431 | 4.596325  |
| H | -2.943706 | -0.152515 | 4.744222  |
| H | -4.224275 | -2.153182 | 5.400309  |
| C | 0.424264  | 2.580291  | -1.526312 |
| H | 0.721972  | 2.497235  | -2.586530 |
| C | -1.077756 | 2.745000  | -1.392407 |
| H | -1.393306 | 2.798764  | -0.337599 |
| H | -1.463017 | 3.671790  | -1.859067 |
| H | -1.649637 | 1.924133  | -1.849879 |
| B | 1.223747  | 3.713793  | -0.885599 |
| O | 0.635223  | 4.770763  | -0.197054 |
| O | 2.607163  | 3.869741  | -0.921425 |
| C | 2.901323  | 5.231757  | -0.565673 |
| C | 1.675672  | 5.615497  | 0.329981  |
| C | 4.238946  | 5.287115  | 0.141538  |
| H | 4.265658  | 4.637305  | 1.025516  |
| H | 5.039548  | 4.964440  | -0.539792 |
| H | 4.471140  | 6.311917  | 0.467165  |
| C | 2.955828  | 6.033683  | -1.859014 |
| H | 1.992160  | 6.001082  | -2.388001 |
| H | 3.215235  | 7.087201  | -1.683124 |
| H | 3.715212  | 5.601288  | -2.525007 |
| C | 1.240735  | 7.061982  | 0.213456  |
| H | 2.050032  | 7.743445  | 0.514338  |
| H | 0.939859  | 7.315387  | -0.810371 |
| H | 0.382164  | 7.254656  | 0.871321  |
| C | 1.870270  | 5.248034  | 1.791464  |
| H | 0.910837  | 5.350185  | 2.315783  |
| H | 2.209490  | 4.209229  | 1.908275  |
| H | 2.600118  | 5.901350  | 2.290009  |

170

Figure\_S7\_imid-3\_modeD\_ts(AS)\_01 / electronic energy: -4442.744184694649 a.u. / lowest freq: -259.20 cm<sup>-1</sup>

|   |           |           |          |
|---|-----------|-----------|----------|
| C | 0.482095  | 0.089062  | 3.254720 |
| H | 0.803924  | -0.864808 | 3.693004 |
| C | -0.994496 | 0.081675  | 2.800761 |
| H | -1.552535 | 0.956036  | 3.172974 |
| C | 0.394288  | 0.339357  | 0.903029 |
| C | 2.612064  | 0.432962  | 1.847002 |
| C | 3.073161  | 1.595996  | 1.218904 |
| C | 3.546233  | -0.535434 | 2.262140 |

|    |           |           |           |
|----|-----------|-----------|-----------|
| C  | 4.429526  | 1.810716  | 0.998570  |
| H  | 2.342250  | 2.338329  | 0.890108  |
| C  | 4.908527  | -0.295271 | 2.062447  |
| C  | 5.354633  | 0.865745  | 1.436139  |
| H  | 4.750914  | 2.715834  | 0.479619  |
| H  | 5.615963  | -1.059802 | 2.388366  |
| H  | 6.424411  | 1.023377  | 1.281850  |
| S  | 3.089738  | -2.119605 | 2.987521  |
| O  | 4.310758  | -2.969035 | 2.883980  |
| O  | 1.999028  | -2.650703 | 2.113714  |
| O  | 2.678129  | -1.843085 | 4.376199  |
| Cu | 1.186063  | 0.766402  | -0.896059 |
| C  | 0.785775  | 1.208491  | 4.220089  |
| C  | 1.188848  | 0.920402  | 5.536054  |
| C  | 0.660428  | 2.553626  | 3.823589  |
| C  | 1.474442  | 1.955500  | 6.431073  |
| H  | 1.274395  | -0.103562 | 5.875243  |
| C  | 0.944919  | 3.584900  | 4.723710  |
| H  | 0.341290  | 2.801566  | 2.818886  |
| C  | 1.354516  | 3.286254  | 6.024871  |
| H  | 1.785331  | 1.725390  | 7.441932  |
| H  | 0.845530  | 4.616844  | 4.415376  |
| H  | 1.574246  | 4.086198  | 6.720003  |
| N  | 1.205393  | 0.282213  | 1.973989  |
| N  | -0.868641 | 0.196543  | 1.330017  |
| C  | 2.402216  | 0.298632  | -2.478137 |
| C  | 3.328839  | 1.322477  | -2.952426 |
| C  | 2.965584  | 2.133084  | -4.044579 |
| C  | 4.595615  | 1.521428  | -2.374408 |
| C  | 3.818813  | 3.123915  | -4.517317 |
| C  | 5.446345  | 2.515136  | -2.844413 |
| C  | 5.060693  | 3.327348  | -3.912977 |
| H  | 3.515395  | 3.742095  | -5.366010 |
| H  | 6.426286  | 2.651964  | -2.378894 |
| H  | 5.732041  | 4.106308  | -4.282956 |
| C  | 2.653655  | -0.622987 | -1.425810 |
| C  | 1.901173  | -1.802244 | -1.275372 |
| H  | 1.893682  | -2.306874 | -0.305396 |
| H  | 1.009114  | -1.925474 | -1.887961 |
| H  | 4.925160  | 0.879077  | -1.554176 |
| H  | 3.513404  | -0.477581 | -0.761851 |
| P  | 3.358865  | -4.306707 | -1.432803 |
| O  | 4.434290  | -3.626728 | -0.384324 |
| O  | 2.523021  | -5.178925 | -0.541059 |
| O  | 4.276435  | -5.124783 | -2.490392 |
| O  | 2.747707  | -3.195379 | -2.300034 |
| Na | 3.239936  | -4.679699 | 1.571484  |
| H  | 1.633677  | -0.000320 | -3.204294 |
| H  | 1.999136  | 1.968482  | -4.530224 |
| C  | 5.461909  | -2.777856 | -0.866697 |
| H  | 5.796490  | -2.148478 | -0.032418 |
| H  | 6.316101  | -3.363386 | -1.239642 |
| H  | 5.097514  | -2.131623 | -1.680789 |
| C  | 4.861822  | -6.351310 | -2.081011 |
| H  | 5.412507  | -6.754055 | -2.938068 |
| H  | 5.567673  | -6.203985 | -1.248251 |
| H  | 4.097243  | -7.078061 | -1.771642 |
| C  | -1.964250 | 0.010618  | 0.447575  |
| C  | -3.223832 | 0.554781  | 0.744314  |
| C  | -1.820591 | -0.791201 | -0.693102 |
| C  | -4.319993 | 0.294905  | -0.089689 |
| C  | -2.915177 | -1.066898 | -1.519658 |
| C  | -4.168988 | -0.528674 | -1.211292 |
| H  | -5.019343 | -0.735469 | -1.850926 |
| H  | -0.866609 | -1.237183 | -0.914359 |
| H  | -3.353046 | 1.186560  | 1.613877  |
| C  | -2.742469 | -1.944484 | -2.696657 |
| C  | -2.711877 | -1.386154 | -4.007690 |
| C  | -2.550253 | -3.344900 | -2.514899 |
| C  | -2.480276 | -2.238055 | -5.103150 |
| C  | -2.320592 | -4.151153 | -3.644810 |
| C  | -2.287200 | -3.602107 | -4.920918 |
| H  | -2.437542 | -1.844927 | -6.110317 |
| H  | -2.162819 | -5.216593 | -3.541631 |
| H  | -2.106744 | -4.239642 | -5.776965 |
| C  | -5.628052 | 0.913429  | 0.191801  |
| C  | -6.578207 | 0.232886  | 1.002415  |
| C  | -5.948614 | 2.176922  | -0.379142 |
| C  | -7.833908 | 0.829646  | 1.220072  |
| C  | -7.212012 | 2.737898  | -0.119347 |
| C  | -8.141822 | 2.069150  | 0.669406  |
| H  | -8.586217 | 0.333291  | 1.818637  |
| H  | -7.486999 | 3.697676  | -0.536648 |
| H  | -9.112115 | 2.513235  | 0.851421  |
| C  | -4.969110 | 2.936134  | -1.275125 |
| H  | -4.022539 | 2.375240  | -1.397312 |
| C  | -4.582404 | 4.285067  | -0.657703 |
| H  | -4.169199 | 4.129438  | 0.361953  |

|   |           |           |           |
|---|-----------|-----------|-----------|
| H | -3.800513 | 4.775833  | -1.275975 |
| H | -5.457358 | 4.965420  | -0.592824 |
| C | -5.534820 | 3.113977  | -2.688911 |
| H | -5.818870 | 2.125570  | -3.109545 |
| H | -6.427129 | 3.774634  | -2.686736 |
| H | -4.764925 | 3.563433  | -3.352158 |
| C | -6.285982 | -1.132844 | 1.624794  |
| H | -5.246477 | -1.456970 | 1.412437  |
| C | -7.199935 | -2.210615 | 1.030886  |
| H | -6.917295 | -3.209688 | 1.426496  |
| H | -8.264295 | -2.018993 | 1.283162  |
| H | -7.089671 | -2.232841 | -0.074629 |
| C | -6.407406 | -1.088267 | 3.153043  |
| H | -6.117184 | -2.069748 | 3.583816  |
| H | -5.728575 | -0.310931 | 3.564600  |
| H | -7.446583 | -0.866086 | 3.473198  |
| C | -2.584288 | -4.004135 | -1.134367 |
| H | -2.821186 | -3.267593 | -0.340760 |
| C | -2.884080 | 0.111196  | -4.265800 |
| H | -3.093183 | 0.657847  | -3.328249 |
| C | -1.598546 | 0.722174  | -4.836817 |
| H | -0.744245 | 0.508326  | -4.159519 |
| H | -1.370310 | 0.312918  | -5.843422 |
| H | -1.705250 | 1.825049  | -4.919192 |
| C | -4.083786 | 0.388364  | -5.180232 |
| H | -3.920417 | -0.018933 | -6.199808 |
| H | -5.000795 | -0.069039 | -4.750778 |
| H | -4.250689 | 1.483541  | -5.265071 |
| C | -1.216236 | -4.600141 | -0.778878 |
| H | -0.928834 | -5.403823 | -1.488793 |
| H | -0.439201 | -3.807299 | -0.800408 |
| H | -1.239863 | -5.030619 | 0.243744  |
| C | -3.688459 | -5.065370 | -1.048783 |
| H | -4.666096 | -4.618732 | -1.330664 |
| H | -3.477820 | -5.925767 | -1.717862 |
| H | -3.769385 | -5.444528 | -0.007378 |
| H | -0.646418 | -2.488251 | 1.864950  |
| H | -1.848346 | -4.524244 | 2.565747  |
| C | -1.406645 | -2.417539 | 2.631438  |
| C | -2.089780 | -3.573159 | 3.020602  |
| C | -1.718759 | -1.175811 | 3.216601  |
| C | -3.083234 | -3.503503 | 3.999477  |
| H | -3.610318 | -4.399542 | 4.300395  |
| C | -2.722368 | -1.117411 | 4.199260  |
| C | -3.395056 | -2.277900 | 4.591818  |
| H | -2.981676 | -0.175641 | 4.666612  |
| H | -4.162954 | -2.225635 | 5.352707  |
| C | 0.419391  | 2.501959  | -1.640329 |
| H | 0.702515  | 2.389792  | -2.700358 |
| C | -1.082596 | 2.594161  | -1.485043 |
| H | -1.385979 | 2.690273  | -0.430968 |
| H | -1.503452 | 3.480160  | -1.994847 |
| H | -1.618431 | 1.730076  | -1.901861 |
| B | 1.177902  | 3.698611  | -1.041355 |
| O | 0.525868  | 4.741759  | -0.405008 |
| O | 2.544337  | 3.919648  | -1.091614 |
| C | 2.764466  | 5.315817  | -0.793552 |
| C | 1.517053  | 5.670686  | 0.083474  |
| C | 4.093955  | 5.478731  | -0.089513 |
| H | 4.152163  | 4.882371  | 0.829444  |
| H | 4.914218  | 5.165738  | -0.751352 |
| H | 4.266929  | 6.531064  | 0.179158  |
| C | 2.777987  | 6.057000  | -2.122718 |
| H | 1.818121  | 5.952254  | -2.648923 |
| H | 2.984263  | 7.128809  | -1.995544 |
| H | 3.558664  | 5.630813  | -2.767063 |
| C | 0.998512  | 7.081369  | -0.101632 |
| H | 1.765363  | 7.821995  | 0.168187  |
| H | 0.686902  | 7.269990  | -1.136002 |
| H | 0.128376  | 7.252993  | 0.546426  |
| C | 1.724475  | 5.380422  | 1.559961  |
| H | 0.758462  | 5.448629  | 2.077528  |
| H | 2.126215  | 4.371003  | 1.725962  |
| H | 2.411150  | 6.098620  | 2.028962  |

170

Figure\_S7\_imid-3\_modeD\_ts(AS)\_02 / electronic energy: -4442.745381055473 a.u. / lowest freq: -275.78 cm-1

|   |           |           |          |
|---|-----------|-----------|----------|
| C | -0.771787 | -0.843775 | 3.217681 |
| H | -0.743354 | 0.036026  | 3.876603 |
| C | 0.616582  | -1.226987 | 2.664164 |
| H | 0.787167  | -2.316490 | 2.672129 |
| C | -0.723082 | -0.432668 | 0.888139 |
| C | -2.868168 | -0.092966 | 1.918518 |
| C | -3.702131 | -0.851722 | 1.089958 |
| C | -3.388846 | 1.042502  | 2.564676 |
| C | -5.036280 | -0.507017 | 0.900516 |
| H | -3.277463 | -1.716889 | 0.576116 |
| C | -4.734214 | 1.372694  | 2.379512 |
| C | -5.557437 | 0.606388  | 1.556973 |

|    |           |           |           |
|----|-----------|-----------|-----------|
| H  | -5.654048 | -1.105500 | 0.227311  |
| H  | -5.117616 | 2.267007  | 2.873881  |
| H  | -6.602983 | 0.890800  | 1.420763  |
| S  | -2.411539 | 2.130454  | 3.617738  |
| O  | -3.152498 | 3.423439  | 3.636932  |
| O  | -1.092948 | 2.302876  | 2.930049  |
| O  | -2.325508 | 1.453965  | 4.923766  |
| Cu | -1.616477 | -0.101299 | -0.885998 |
| C  | -1.452759 | -1.987585 | 3.925213  |
| C  | -1.761226 | -1.893390 | 5.293369  |
| C  | -1.789147 | -3.163398 | 3.228262  |
| C  | -2.402626 | -2.949658 | 5.947361  |
| H  | -1.501482 | -1.006813 | 5.857140  |
| C  | -2.430683 | -4.216458 | 3.886243  |
| H  | -1.553248 | -3.261884 | 2.176168  |
| C  | -2.738840 | -4.109055 | 5.244249  |
| H  | -2.637714 | -2.869731 | 7.000816  |
| H  | -2.687985 | -5.116922 | 3.344182  |
| H  | -3.235173 | -4.925516 | 5.752603  |
| N  | -1.501960 | -0.474794 | 1.983256  |
| N  | 0.516883  | -0.789013 | 1.252374  |
| C  | -2.593938 | 1.153712  | -2.197344 |
| C  | -3.710457 | 0.620922  | -2.973875 |
| C  | -3.479641 | 0.128694  | -4.272059 |
| C  | -5.026505 | 0.583401  | -2.478098 |
| C  | -4.514586 | -0.407823 | -5.031517 |
| C  | -6.060736 | 0.049523  | -3.237855 |
| C  | -5.810535 | -0.456374 | -4.515418 |
| H  | -4.310328 | -0.786808 | -6.035950 |
| H  | -7.075759 | 0.031869  | -2.831985 |
| H  | -6.624681 | -0.876853 | -5.110731 |
| C  | -2.682629 | 1.704483  | -0.896287 |
| C  | -1.652913 | 2.471177  | -0.311376 |
| H  | -1.579527 | 2.514584  | 0.777166  |
| H  | -0.700902 | 2.544109  | -0.841481 |
| H  | -5.243218 | 0.982223  | -1.484466 |
| H  | -3.612924 | 1.600950  | -0.326882 |
| P  | -0.959458 | 5.287324  | -0.411650 |
| O  | -1.519930 | 6.594933  | -1.198122 |
| O  | -0.389584 | 5.611686  | 0.938375  |
| O  | 0.264680  | 4.756342  | -1.350354 |
| O  | -2.135885 | 4.290447  | -0.524876 |
| Na | -1.273022 | 4.739520  | 2.803657  |
| H  | -1.712514 | 1.434784  | -2.790591 |
| H  | -2.468388 | 0.176782  | -4.686956 |
| C  | -0.728922 | 7.772661  | -1.185811 |
| H  | -1.269153 | 8.538674  | -1.752970 |
| H  | -0.562398 | 8.135548  | -0.161029 |
| H  | 0.250633  | 7.606319  | -1.661567 |
| C  | -0.008057 | 4.432326  | -2.703915 |
| H  | 0.523790  | 3.505452  | -2.955466 |
| H  | -1.082294 | 4.272240  | -2.881940 |
| H  | 0.344997  | 5.232265  | -3.370970 |
| C  | 1.634111  | -0.707146 | 0.382171  |
| C  | 2.626151  | -1.701622 | 0.396040  |
| C  | 1.809357  | 0.420902  | -0.433551 |
| C  | 3.773564  | -1.566214 | -0.397067 |
| C  | 2.963982  | 0.566053  | -1.211759 |
| C  | 3.946197  | -0.428244 | -1.191088 |
| H  | 4.841691  | -0.317181 | -1.791926 |
| H  | 1.074036  | 1.210102  | -0.424462 |
| H  | 2.508259  | -2.580418 | 1.017163  |
| C  | 3.167747  | 1.790879  | -2.010195 |
| C  | 2.963212  | 1.767995  | -3.419120 |
| C  | 3.544614  | 3.001903  | -1.363019 |
| C  | 3.121959  | 2.961473  | -4.147135 |
| C  | 3.683099  | 4.169314  | -2.135907 |
| C  | 3.475445  | 4.145908  | -3.510404 |
| H  | 2.957909  | 2.983006  | -5.216355 |
| H  | 3.954820  | 5.109307  | -1.674191 |
| H  | 3.584617  | 5.055451  | -4.086994 |
| C  | 4.803430  | -2.620796 | -0.405282 |
| C  | 5.901801  | -2.547832 | 0.495704  |
| C  | 4.728189  | -3.674817 | -1.358230 |
| C  | 6.907298  | -3.529296 | 0.418669  |
| C  | 5.749751  | -4.641337 | -1.382937 |
| C  | 6.825800  | -4.565690 | -0.505274 |
| H  | 7.767392  | -3.493299 | 1.073962  |
| H  | 5.723354  | -5.455441 | -2.095299 |
| H  | 7.607953  | -5.312903 | -0.546737 |
| C  | 3.584679  | -3.777029 | -2.367948 |
| H  | 2.856819  | -2.954908 | -2.229576 |
| C  | 2.792526  | -5.076633 | -2.182592 |
| H  | 2.424466  | -5.149147 | -1.136701 |
| H  | 1.911993  | -5.084927 | -2.860034 |
| H  | 3.416742  | -5.966483 | -2.408476 |
| C  | 4.101083  | -3.640842 | -3.805048 |
| H  | 4.671369  | -2.693308 | -3.913770 |

|   |           |           |           |
|---|-----------|-----------|-----------|
| H | 4.759281  | -4.491805 | -4.079643 |
| H | 3.246552  | -3.612266 | -4.514691 |
| C | 6.038171  | -1.421286 | 1.521077  |
| H | 5.142976  | -0.765873 | 1.519073  |
| C | 7.230975  | -0.519881 | 1.184025  |
| H | 7.269292  | 0.339950  | 1.886751  |
| H | 8.188359  | -1.078302 | 1.254502  |
| H | 7.122448  | -0.118674 | 0.153415  |
| C | 6.148973  | -1.971250 | 2.948687  |
| H | 6.159969  | -1.132632 | 3.676551  |
| H | 5.275156  | -2.619331 | 3.174141  |
| H | 7.079953  | -2.558687 | 3.089093  |
| C | 3.811693  | 3.073785  | 0.142121  |
| H | 3.721629  | 2.075923  | 0.616666  |
| C | 2.544624  | 0.499022  | -4.162088 |
| H | 2.507336  | -0.370054 | -3.479023 |
| C | 1.133598  | 0.644442  | -4.742982 |
| H | 0.417903  | 0.896393  | -3.932183 |
| H | 1.096289  | 1.440152  | -5.516545 |
| H | 0.809530  | -0.313637 | -5.202880 |
| C | 3.558383  | 0.123745  | -5.250006 |
| H | 3.576834  | 0.876875  | -6.065257 |
| H | 4.574935  | 0.042900  | -4.808790 |
| H | 3.293871  | -0.861456 | -5.690564 |
| C | 2.785579  | 3.974726  | 0.838252  |
| H | 2.844108  | 5.017801  | 0.463275  |
| H | 1.761207  | 3.582358  | 0.664597  |
| H | 2.967131  | 3.988423  | 1.932852  |
| C | 5.244351  | 3.537153  | 0.434140  |
| H | 5.969596  | 2.883177  | -0.096091 |
| H | 5.404098  | 4.588220  | 0.114633  |
| H | 5.450210  | 3.467960  | 1.523932  |
| H | 1.373482  | 1.426674  | 2.600299  |
| H | 3.217950  | 2.496272  | 3.838940  |
| C | 1.984085  | 0.827897  | 3.262561  |
| C | 3.032235  | 1.437605  | 3.957853  |
| C | 1.740878  | -0.550805 | 3.409073  |
| C | 3.839982  | 0.682741  | 4.810776  |
| H | 4.650623  | 1.156781  | 5.348730  |
| C | 2.561588  | -1.300893 | 4.269300  |
| C | 3.601068  | -0.683826 | 4.970520  |
| H | 2.393992  | -2.362344 | 4.403359  |
| H | 4.227033  | -1.267740 | 5.632790  |
| C | -1.364776 | -1.698178 | -2.122053 |
| H | -1.604027 | -1.225331 | -3.088610 |
| C | 0.043697  | -2.249832 | -2.125641 |
| H | 0.302685  | -2.735555 | -1.171679 |
| H | 0.191524  | -3.024842 | -2.900030 |
| H | 0.809931  | -1.485133 | -2.320618 |
| B | -2.451167 | -2.733973 | -1.791020 |
| O | -2.163214 | -4.056843 | -1.495810 |
| O | -3.819805 | -2.509722 | -1.784073 |
| C | -4.470141 | -3.797475 | -1.828351 |
| C | -3.395874 | -4.739759 | -1.184284 |
| C | -5.778507 | -3.722511 | -1.071754 |
| H | -5.638332 | -3.408311 | -0.029740 |
| H | -6.452594 | -3.001240 | -1.555474 |
| H | -6.284328 | -4.699023 | -1.064916 |
| C | -4.726706 | -4.116568 | -3.294208 |
| H | -3.787301 | -4.168377 | -3.863514 |
| H | -5.258008 | -5.069880 | -3.421796 |
| H | -5.340850 | -3.321460 | -3.738566 |
| C | -3.346023 | -6.132838 | -1.776454 |
| H | -4.304278 | -6.654499 | -1.638004 |
| H | -3.116291 | -6.114325 | -2.848428 |
| H | -2.568577 | -6.728016 | -1.278412 |
| C | -3.504500 | -4.824067 | 0.328843  |
| H | -2.610505 | -5.320443 | 0.729666  |
| H | -3.572706 | -3.829680 | 0.790555  |
| H | -4.383188 | -5.402578 | 0.646116  |

170

Figure\_S7\_imid-3\_modeD\_ts(AS)\_03 / electronic energy: -4442.751658658786 a.u. / lowest freq: -273.13 cm<sup>-1</sup>

|   |           |           |           |
|---|-----------|-----------|-----------|
| C | -1.391245 | -1.122972 | 2.714846  |
| H | -1.818509 | -0.248604 | 3.219640  |
| C | 0.121540  | -0.985814 | 2.447757  |
| H | 0.643802  | -1.954811 | 2.535210  |
| C | -1.023635 | -0.745796 | 0.410341  |
| C | -3.296190 | -1.277656 | 0.924821  |
| C | -3.534221 | -2.149743 | -0.149674 |
| C | -4.376840 | -0.562262 | 1.473826  |
| C | -4.810860 | -2.318313 | -0.673904 |
| H | -2.696282 | -2.720462 | -0.561889 |
| C | -5.658330 | -0.753685 | 0.945528  |
| C | -5.882243 | -1.621406 | -0.119198 |
| H | -4.960531 | -3.003987 | -1.511055 |
| H | -6.481192 | -0.183602 | 1.379385  |
| H | -6.892556 | -1.747032 | -0.514467 |
| S | -4.223083 | 0.632094  | 2.811670  |

|    |           |           |           |
|----|-----------|-----------|-----------|
| O  | -5.480531 | 1.431981  | 2.778140  |
| O  | -3.055949 | 1.499234  | 2.448329  |
| O  | -4.032230 | -0.152579 | 4.043717  |
| Cu | -1.595072 | -0.520475 | -1.494011 |
| C  | -1.711044 | -2.337403 | 3.557530  |
| C  | -1.382002 | -2.303185 | 4.925139  |
| C  | -2.307568 | -3.503051 | 3.035991  |
| C  | -1.641978 | -3.401572 | 5.748956  |
| H  | -0.923724 | -1.421062 | 5.355111  |
| C  | -2.563616 | -4.600010 | 3.863495  |
| H  | -2.567149 | -3.587243 | 1.994267  |
| C  | -2.232393 | -4.549568 | 5.218491  |
| H  | -1.384474 | -3.362272 | 6.799461  |
| H  | -3.017274 | -5.492313 | 3.451633  |
| H  | -2.431878 | -5.400467 | 5.856881  |
| N  | -1.936267 | -1.143742 | 1.328319  |
| N  | 0.141875  | -0.574111 | 1.035091  |
| C  | -2.613218 | 0.604805  | -2.879418 |
| C  | -3.376327 | -0.079818 | -3.919079 |
| C  | -2.786342 | -0.266241 | -5.183948 |
| C  | -4.676881 | -0.576338 | -3.717520 |
| C  | -3.461711 | -0.930642 | -6.202556 |
| C  | -5.349886 | -1.244348 | -4.736043 |
| C  | -4.746843 | -1.427862 | -5.982545 |
| H  | -2.981676 | -1.062299 | -7.175237 |
| H  | -6.360248 | -1.620994 | -4.557630 |
| H  | -5.279462 | -1.951539 | -6.779505 |
| C  | -3.076212 | 0.959367  | -1.589550 |
| C  | -2.332374 | 1.809371  | -0.740325 |
| H  | -2.512674 | 1.764455  | 0.337114  |
| H  | -1.317426 | 2.073922  | -1.039617 |
| H  | -5.171546 | -0.434323 | -2.753772 |
| H  | -4.050494 | 0.602232  | -1.234815 |
| P  | -2.425730 | 4.653336  | -0.032091 |
| O  | -2.476870 | 6.082687  | -0.806254 |
| O  | -3.030038 | 4.863891  | 1.325427  |
| O  | -0.832098 | 4.308222  | 0.052813  |
| O  | -2.982311 | 3.576713  | -0.984782 |
| Na | -4.386489 | 3.550838  | 2.490811  |
| H  | -1.737531 | 1.156409  | -3.246139 |
| H  | -1.778182 | 0.120721  | -5.359975 |
| C  | -1.896442 | 6.191020  | -2.095712 |
| H  | -2.189646 | 7.161248  | -2.511829 |
| H  | -0.797319 | 6.145553  | -2.045191 |
| H  | -2.252060 | 5.393222  | -2.764007 |
| C  | -0.021448 | 5.074130  | 0.923829  |
| H  | 1.022853  | 4.886237  | 0.655670  |
| H  | -0.215815 | 6.152801  | 0.818488  |
| H  | -0.178009 | 4.791319  | 1.974954  |
| C  | 1.319816  | -0.164271 | 0.368330  |
| C  | 2.392756  | -1.052742 | 0.217012  |
| C  | 1.479262  | 1.177985  | -0.006836 |
| C  | 3.604983  | -0.616363 | -0.332466 |
| C  | 2.694987  | 1.623010  | -0.545576 |
| C  | 3.750487  | 0.719759  | -0.721305 |
| H  | 4.697095  | 1.065241  | -1.120482 |
| H  | 0.681618  | 1.885523  | 0.173855  |
| H  | 2.302559  | -2.072609 | 0.554942  |
| C  | 2.906049  | 3.055974  | -0.842058 |
| C  | 2.458330  | 3.605696  | -2.076931 |
| C  | 3.644403  | 3.863884  | 0.070504  |
| C  | 2.780679  | 4.940519  | -2.383267 |
| C  | 3.942181  | 5.192051  | -0.285762 |
| C  | 3.511305  | 5.721601  | -1.496106 |
| H  | 2.482570  | 5.380784  | -3.325250 |
| H  | 4.519858  | 5.826204  | 0.373293  |
| H  | 3.754111  | 6.744674  | -1.753287 |
| C  | 4.756766  | -1.539281 | -0.414635 |
| C  | 5.497847  | -1.852572 | 0.761246  |
| C  | 5.135395  | -2.105812 | -1.665546 |
| C  | 6.578743  | -2.748171 | 0.664682  |
| C  | 6.237065  | -2.979938 | -1.710133 |
| C  | 6.941848  | -3.302213 | -0.556768 |
| H  | 7.157524  | -3.013566 | 1.539514  |
| H  | 6.556409  | -3.420976 | -2.645103 |
| H  | 7.782637  | -3.981869 | -0.611354 |
| C  | 4.389930  | -1.795442 | -2.962603 |
| H  | 3.527844  | -1.129180 | -2.774197 |
| C  | 3.812243  | -3.068928 | -3.593917 |
| H  | 3.155858  | -3.587254 | -2.864935 |
| H  | 3.203759  | -2.810524 | -4.486147 |
| H  | 4.615032  | -3.765348 | -3.913767 |
| C  | 5.293500  | -1.050487 | -3.951729 |
| H  | 5.697046  | -0.130421 | -3.477075 |
| H  | 6.141161  | -1.687548 | -4.281356 |
| H  | 4.709094  | -0.748950 | -4.847350 |
| C  | 5.177329  | -1.229676 | 2.121331  |
| H  | 4.338883  | -0.508092 | 2.048348  |

|   |           |           |           |
|---|-----------|-----------|-----------|
| C | 6.368240  | -0.425534 | 2.657962  |
| H | 6.067033  | 0.136576  | 3.567996  |
| H | 7.218985  | -1.088361 | 2.921504  |
| H | 6.706728  | 0.306492  | 1.894296  |
| C | 4.739099  | -2.301181 | 3.126376  |
| H | 4.490595  | -1.830204 | 4.100754  |
| H | 3.834537  | -2.824952 | 2.749078  |
| H | 5.542454  | -3.047734 | 3.298349  |
| C | 4.138812  | 3.330957  | 1.416684  |
| H | 3.745757  | 2.312045  | 1.612166  |
| C | 1.694438  | 2.775478  | -3.105851 |
| H | 1.418911  | 1.791773  | -2.684436 |
| C | 0.371442  | 3.439430  | -3.510580 |
| H | -0.244450 | 3.637174  | -2.609550 |
| H | 0.538961  | 4.394561  | -4.049585 |
| H | -0.200333 | 2.765464  | -4.182485 |
| C | 2.568281  | 2.494335  | -4.332621 |
| H | 2.829368  | 3.435731  | -4.861004 |
| H | 3.504831  | 1.983450  | -4.020819 |
| H | 2.030386  | 1.826784  | -5.039388 |
| C | 3.644697  | 4.195896  | 2.583857  |
| H | 4.103165  | 5.206377  | 2.566887  |
| H | 2.541409  | 4.301879  | 2.538834  |
| H | 3.909393  | 3.714632  | 3.549140  |
| C | 5.667319  | 3.221724  | 1.429076  |
| H | 6.007886  | 2.565588  | 0.599987  |
| H | 6.141111  | 4.219630  | 1.314672  |
| H | 6.009372  | 2.776138  | 2.387468  |
| H | -0.346824 | 1.723709  | 2.594489  |
| H | 0.741891  | 3.363772  | 4.076788  |
| C | 0.415831  | 1.389187  | 3.285744  |
| C | 1.035264  | 2.323097  | 4.119692  |
| C | 0.784170  | 0.031781  | 3.341271  |
| C | 2.036479  | 1.916275  | 5.004711  |
| H | 2.519362  | 2.642322  | 5.645732  |
| C | 1.788068  | -0.367154 | 4.239423  |
| C | 2.415006  | 0.572957  | 5.061882  |
| H | 2.079359  | -1.406907 | 4.309394  |
| H | 3.190378  | 0.258434  | 5.748313  |
| C | -0.627510 | -1.711694 | -2.829805 |
| H | -1.381623 | -1.868231 | -3.618329 |
| C | 0.556374  | -0.920185 | -3.334940 |
| H | 1.248721  | -0.645979 | -2.524889 |
| H | 1.164922  | -1.477552 | -4.070216 |
| H | 0.268645  | 0.017591  | -3.838325 |
| B | -0.375251 | -3.006150 | -2.060492 |
| O | 0.795965  | -3.367057 | -1.415920 |
| O | -1.341288 | -4.001869 | -1.937060 |
| C | -0.682283 | -5.190735 | -1.456158 |
| C | 0.559068  | -4.600531 | -0.702542 |
| C | -1.647357 | -5.970278 | -0.588682 |
| H | -2.073955 | -5.350216 | 0.209051  |
| H | -2.479653 | -6.350003 | -1.196770 |
| H | -1.152115 | -6.835382 | -0.124132 |
| C | -0.286149 | -6.006368 | -2.677409 |
| H | 0.423999  | -5.457075 | -3.311638 |
| H | 0.170812  | -6.966713 | -2.401030 |
| H | -1.179460 | -6.217764 | -3.280140 |
| C | 1.808340  | -5.452334 | -0.768239 |
| H | 1.655640  | -6.415186 | -0.258947 |
| H | 2.115776  | -5.654995 | -1.800919 |
| H | 2.639100  | -4.936658 | -0.267478 |
| C | 0.231125  | -4.252119 | 0.739893  |
| H | 1.108011  | -3.836648 | 1.251084  |
| H | -0.573635 | -3.504805 | 0.772268  |
| H | -0.084010 | -5.132612 | 1.315142  |

170

Figure\_S7\_imid-3\_modeD\_ts(AS)\_04 / electronic energy: -4442.747191445505 a.u. / lowest freq: -270.71 cm<sup>-1</sup>

|    |           |           |           |
|----|-----------|-----------|-----------|
| C  | -0.785304 | -1.481038 | 2.676611  |
| H  | -1.367413 | -0.740379 | 3.239343  |
| C  | 0.658039  | -1.024696 | 2.388013  |
| H  | 1.359734  | -1.877034 | 2.369122  |
| C  | -0.585641 | -0.873376 | 0.404114  |
| C  | -2.663419 | -1.938679 | 0.899697  |
| C  | -2.728805 | -2.770095 | -0.230013 |
| C  | -3.861902 | -1.511635 | 1.500483  |
| C  | -3.949372 | -3.168838 | -0.763703 |
| H  | -1.796174 | -3.125993 | -0.678284 |
| C  | -5.082372 | -1.933509 | 0.962376  |
| C  | -5.134937 | -2.751806 | -0.162378 |
| H  | -3.964302 | -3.811675 | -1.646815 |
| H  | -5.998338 | -1.582738 | 1.441030  |
| H  | -6.101864 | -3.060780 | -0.566153 |
| S  | -3.936624 | -0.415394 | 2.922935  |
| O  | -5.352674 | 0.043893  | 2.998678  |
| O  | -3.033870 | 0.733397  | 2.587992  |
| O  | -3.500175 | -1.212259 | 4.083060  |
| Cu | -1.259308 | -0.660029 | -1.464928 |



|    |           |           |           |
|----|-----------|-----------|-----------|
| C  | -0.823603 | -2.780258 | 3.449791  |
| C  | -0.470227 | -2.754833 | 4.811589  |
| C  | -1.178354 | -4.014155 | 2.867724  |
| C  | -0.471945 | -3.927899 | 5.570939  |
| H  | -0.193893 | -1.821973 | 5.287355  |
| C  | -1.176546 | -5.185090 | 3.630973  |
| H  | -1.442955 | -4.092975 | 1.826714  |
| C  | -0.824816 | -5.142521 | 4.981029  |
| H  | -0.198356 | -3.894670 | 6.617579  |
| H  | -1.445242 | -6.128231 | 3.172775  |
| H  | -0.824025 | -6.050911 | 5.569420  |
| N  | -1.355236 | -1.536666 | 1.299721  |
| N  | 0.535047  | -0.496199 | 1.020563  |
| C  | -2.530873 | 0.251811  | -2.778652 |
| C  | -3.234638 | -0.551741 | -3.775151 |
| C  | -2.673442 | -0.695569 | -5.058766 |
| C  | -4.464972 | -1.184471 | -3.518307 |
| C  | -3.304399 | -1.453682 | -6.038947 |
| C  | -5.095072 | -1.943565 | -4.499816 |
| C  | -4.517813 | -2.086430 | -5.763202 |
| H  | -2.848015 | -1.550346 | -7.026933 |
| H  | -6.051853 | -2.423792 | -4.278780 |
| H  | -5.016305 | -2.681484 | -6.531678 |
| C  | -2.980742 | 0.513714  | -1.458037 |
| C  | -2.426896 | 1.544613  | -0.672333 |
| H  | -2.570297 | 1.516601  | 0.411659  |
| H  | -1.511746 | 2.023743  | -1.019142 |
| H  | -4.942570 | -1.073305 | -2.541866 |
| H  | -3.825839 | -0.047521 | -1.042903 |
| P  | -4.444645 | 3.521531  | 0.032573  |
| O  | -5.401892 | 2.206521  | 0.297042  |
| O  | -4.060036 | 3.963053  | 1.414770  |
| O  | -5.403345 | 4.574051  | -0.746779 |
| O  | -3.394185 | 3.162781  | -1.031442 |
| Na | -4.815230 | 2.357749  | 2.862312  |
| H  | -1.812966 | 0.970839  | -3.196716 |
| H  | -1.725494 | -0.195903 | -5.279714 |
| C  | -6.114551 | 1.616045  | -0.776981 |
| H  | -6.290221 | 0.560892  | -0.529146 |
| H  | -7.086066 | 2.111354  | -0.925817 |
| H  | -5.546231 | 1.670655  | -1.718681 |
| C  | -6.370170 | 5.296282  | 0.000064  |
| H  | -6.898125 | 5.955331  | -0.697435 |
| H  | -7.104623 | 4.623326  | 0.470282  |
| H  | -5.899317 | 5.905999  | 0.784082  |
| C  | 1.564235  | 0.221910  | 0.368381  |
| C  | 2.817874  | -0.368703 | 0.157100  |
| C  | 1.378697  | 1.576468  | 0.054596  |
| C  | 3.871723  | 0.377908  | -0.385450 |
| C  | 2.433559  | 2.330065  | -0.479063 |
| C  | 3.675417  | 1.725441  | -0.706730 |
| H  | 4.497398  | 2.311096  | -1.102247 |
| H  | 0.435930  | 2.056331  | 0.279616  |
| H  | 2.987154  | -1.396326 | 0.439048  |
| C  | 2.276884  | 3.779310  | -0.725054 |
| C  | 1.781384  | 4.241921  | -1.976639 |
| C  | 2.739946  | 4.712420  | 0.245460  |
| C  | 1.804042  | 5.621884  | -2.249191 |
| C  | 2.736358  | 6.082855  | -0.073691 |
| C  | 2.275352  | 6.528565  | -1.306968 |
| H  | 1.467918  | 6.003743  | -3.203870 |
| H  | 3.105579  | 6.816505  | 0.630450  |
| H  | 2.288553  | 7.586323  | -1.536775 |
| C  | 5.208214  | -0.231758 | -0.549774 |
| C  | 6.053947  | -0.402528 | 0.583996  |
| C  | 5.661745  | -0.626958 | -1.841171 |
| C  | 7.322963  | -0.983142 | 0.403459  |
| C  | 6.944501  | -1.190873 | -1.967961 |
| C  | 7.759586  | -1.371402 | -0.857255 |
| H  | 7.989600  | -1.128933 | 1.243127  |
| H  | 7.322445  | -1.495056 | -2.935090 |
| H  | 8.742194  | -1.809919 | -0.975700 |
| C  | 4.806513  | -0.455851 | -3.095910 |
| H  | 3.816626  | -0.031095 | -2.845897 |
| C  | 4.530365  | -1.804796 | -3.772279 |
| H  | 4.042403  | -2.494553 | -3.053155 |
| H  | 3.847736  | -1.665889 | -4.637015 |
| H  | 5.465552  | -2.273576 | -4.143002 |
| C  | 5.455731  | 0.529169  | -4.074883 |
| H  | 5.648110  | 1.497929  | -3.565860 |
| H  | 6.415043  | 0.132465  | -4.468939 |
| H  | 4.773772  | 0.718573  | -4.931449 |
| C  | 5.642916  | 0.046027  | 1.987656  |
| H  | 4.635579  | 0.508769  | 1.986403  |
| C  | 6.592944  | 1.123425  | 2.525130  |
| H  | 6.204725  | 1.526922  | 3.484971  |
| H  | 7.609891  | 0.714630  | 2.702174  |
| H  | 6.663876  | 1.962254  | 1.800472  |

|   |           |           |           |
|---|-----------|-----------|-----------|
| C | 5.566748  | -1.148561 | 2.946021  |
| H | 5.231954  | -0.811238 | 3.949371  |
| H | 4.835445  | -1.893069 | 2.564287  |
| H | 6.555115  | -1.640700 | 3.060204  |
| C | 3.266281  | 4.270769  | 1.611620  |
| H | 3.121992  | 3.180935  | 1.762191  |
| C | 1.273559  | 3.282739  | -3.049573 |
| H | 1.189700  | 2.259650  | -2.641009 |
| C | -0.136124 | 3.653689  | -3.531493 |
| H | -0.823225 | 3.752260  | -2.664830 |
| H | -0.135361 | 4.606681  | -4.100047 |
| H | -0.528898 | 2.857948  | -4.199283 |
| C | 2.256813  | 3.209526  | -4.221937 |
| H | 2.341116  | 4.191965  | -4.733201 |
| H | 3.261015  | 2.907088  | -3.854729 |
| H | 1.915906  | 2.451228  | -4.958972 |
| C | 2.503423  | 4.953060  | 2.754635  |
| H | 2.695487  | 6.045827  | 2.779076  |
| H | 1.412140  | 4.782043  | 2.637129  |
| H | 2.822602  | 4.527552  | 3.729492  |
| C | 4.772125  | 4.531125  | 1.724698  |
| H | 5.308065  | 4.019352  | 0.897001  |
| H | 4.995300  | 5.618087  | 1.678740  |
| H | 5.156599  | 4.130193  | 2.686926  |
| H | -0.333162 | 1.505501  | 2.824985  |
| H | 0.485018  | 3.188911  | 4.428534  |
| C | 0.517477  | 1.271591  | 3.452114  |
| C | 0.982611  | 2.230909  | 4.354801  |
| C | 1.150759  | 0.018573  | 3.357677  |
| C | 2.092454  | 1.957657  | 5.157726  |
| H | 2.456008  | 2.705203  | 5.850722  |
| C | 2.260552  | -0.249309 | 4.176647  |
| C | 2.731842  | 0.719251  | 5.067383  |
| H | 2.757633  | -1.209569 | 4.130123  |
| H | 3.590035  | 0.507374  | 5.691796  |
| C | -0.103572 | -1.572428 | -2.872257 |
| H | -0.826157 | -1.858558 | -3.653503 |
| C | 0.864636  | -0.518612 | -3.356716 |
| H | 1.494912  | -0.133289 | -2.541511 |
| H | 1.567243  | -0.900723 | -4.119472 |
| H | 0.367546  | 0.349531  | -3.818598 |
| B | 0.470784  | -2.814966 | -2.192669 |
| O | 1.712324  | -2.918324 | -1.590194 |
| O | -0.220008 | -4.020845 | -2.131798 |
| C | 0.719290  | -5.040065 | -1.730273 |
| C | 1.792689  | -4.211030 | -0.948140 |
| C | -0.012736 | -6.081182 | -0.909886 |
| H | -0.568137 | -5.632037 | -0.077144 |
| H | -0.735802 | -6.616307 | -1.540474 |
| H | 0.684173  | -6.825563 | -0.497858 |
| C | 1.279676  | -5.661363 | -3.000293 |
| H | 1.821631  | -4.919506 | -3.603843 |
| H | 1.965065  | -6.491418 | -2.780029 |
| H | 0.456063  | -6.054317 | -3.611136 |
| C | 3.209822  | -4.729273 | -1.062741 |
| H | 3.299069  | -5.733132 | -0.622462 |
| H | 3.549133  | -4.780052 | -2.103804 |
| H | 3.896456  | -4.064374 | -0.521210 |
| C | 1.413323  | -4.024146 | 0.510476  |
| H | 2.166532  | -3.418485 | 1.028526  |
| H | 0.446192  | -3.507556 | 0.582050  |
| H | 1.346778  | -4.978104 | 1.049879  |

170

Figure\_S7\_imid-3\_modeD\_ts(AS)\_05 / electronic energy: -4442.743469571735 a.u. / lowest freq: -217.01 cm-1

|    |           |          |           |
|----|-----------|----------|-----------|
| C  | -0.169281 | 3.864799 | -0.631695 |
| H  | -0.311886 | 4.119665 | -1.692643 |
| C  | 1.178207  | 3.166783 | -0.362014 |
| H  | 1.722941  | 3.600983 | 0.491556  |
| C  | -0.582094 | 1.629994 | 0.044430  |
| C  | -2.540589 | 2.978115 | -0.540465 |
| C  | -3.324174 | 3.577937 | 0.447724  |
| C  | -3.131335 | 2.639648 | -1.773702 |
| C  | -4.675068 | 3.839722 | 0.231733  |
| H  | -2.860241 | 3.836518 | 1.400677  |
| C  | -4.486081 | 2.902517 | -1.982049 |
| C  | -5.256106 | 3.503466 | -0.987450 |
| H  | -5.269568 | 4.304037 | 1.021722  |
| H  | -4.921583 | 2.644580 | -2.948761 |
| H  | -6.313425 | 3.708911 | -1.169958 |
| S  | -2.168584 | 1.975194 | -3.143931 |
| O  | -3.156737 | 1.741325 | -4.240117 |
| O  | -1.605317 | 0.676408 | -2.676868 |
| O  | -1.169441 | 3.014908 | -3.448172 |
| Cu | -1.893111 | 0.353726 | 0.889248  |
| C  | -0.385713 | 5.088124 | 0.225435  |
| C  | -0.657825 | 6.330155 | -0.374445 |
| C  | -0.335677 | 5.004330 | 1.629995  |
| C  | -0.877489 | 7.463146 | 0.414841  |

|    |           |           |           |
|----|-----------|-----------|-----------|
| H  | -0.704104 | 6.423011  | -1.452325 |
| C  | -0.557033 | 6.139358  | 2.414570  |
| H  | -0.131630 | 4.059621  | 2.116396  |
| C  | -0.827874 | 7.367862  | 1.807708  |
| H  | -1.088009 | 8.415649  | -0.054030 |
| H  | -0.520102 | 6.065810  | 3.493744  |
| H  | -0.999636 | 8.245949  | 2.416678  |
| N  | -1.143195 | 2.799643  | -0.308526 |
| N  | 0.753525  | 1.790334  | 0.011344  |
| C  | -3.367151 | -1.046835 | 1.090110  |
| C  | -4.680311 | -0.575318 | 1.521032  |
| C  | -5.289203 | -1.141282 | 2.655165  |
| C  | -5.364860 | 0.444523  | 0.836520  |
| C  | -6.539473 | -0.708167 | 3.084548  |
| C  | -6.612302 | 0.881577  | 1.270383  |
| C  | -7.206920 | 0.306921  | 2.395566  |
| H  | -6.997195 | -1.161979 | 3.967120  |
| H  | -7.121589 | 1.683966  | 0.729918  |
| H  | -8.186014 | 0.651608  | 2.736595  |
| C  | -2.938672 | -1.025861 | -0.268352 |
| C  | -1.805677 | -1.723976 | -0.701743 |
| H  | -1.422005 | -1.497583 | -1.693493 |
| H  | -1.096315 | -2.109259 | 0.032363  |
| H  | -4.895976 | 0.920025  | -0.031311 |
| H  | -3.552631 | -0.532747 | -1.030966 |
| P  | -2.839443 | -3.781987 | -2.569055 |
| O  | -4.203835 | -4.666959 | -2.401736 |
| O  | -3.049432 | -2.580279 | -3.446454 |
| O  | -1.928544 | -4.846978 | -3.381540 |
| O  | -2.269855 | -3.572664 | -1.153653 |
| Na | -2.823617 | -0.610178 | -4.368412 |
| H  | -2.911691 | -1.797870 | 1.746421  |
| H  | -4.754785 | -1.917606 | 3.209235  |
| C  | -5.190747 | -4.192631 | -1.504985 |
| H  | -6.044875 | -4.877935 | -1.553957 |
| H  | -4.815519 | -4.162930 | -0.469900 |
| H  | -5.539271 | -3.182570 | -1.777557 |
| C  | -1.484619 | -6.021544 | -2.724050 |
| H  | -0.784057 | -6.532196 | -3.394427 |
| H  | -0.970730 | -5.782107 | -1.781424 |
| H  | -2.323813 | -6.699010 | -2.505837 |
| C  | 1.680476  | 0.718650  | 0.132698  |
| C  | 2.928461  | 0.915762  | 0.752213  |
| C  | 1.442349  | -0.490133 | -0.537273 |
| C  | 3.916814  | -0.079245 | 0.691063  |
| C  | 2.421048  | -1.490755 | -0.593942 |
| C  | 3.654328  | -1.284556 | 0.030855  |
| H  | 4.429251  | -2.038788 | -0.041890 |
| H  | 0.540317  | -0.604839 | -1.108573 |
| H  | 3.152095  | 1.856831  | 1.238183  |
| C  | 2.193925  | -2.724775 | -1.378503 |
| C  | 2.057666  | -4.032097 | -0.676436 |
| C  | 2.193458  | -2.713258 | -2.799847 |
| C  | 2.010154  | -5.242404 | -1.517738 |
| C  | 2.069227  | -3.931482 | -3.506883 |
| C  | 1.996318  | -5.124040 | -2.901200 |
| H  | 1.961516  | -6.226935 | -1.072136 |
| H  | 2.054295  | -3.923340 | -4.588985 |
| H  | 1.927211  | -6.021328 | -3.503437 |
| C  | 5.276294  | 0.179696  | 1.209049  |
| C  | 6.289599  | 0.666778  | 0.334513  |
| C  | 5.607040  | -0.132366 | 2.554904  |
| C  | 7.600029  | 0.823462  | 0.832645  |
| C  | 6.928914  | 0.082784  | 2.986535  |
| C  | 7.900231  | 0.553896  | 2.107284  |
| H  | 8.396370  | 1.163458  | 0.184039  |
| H  | 7.222642  | -0.138103 | 4.004208  |
| H  | 8.915143  | 0.690380  | 2.459351  |
| C  | 4.597119  | -0.732920 | 3.528420  |
| H  | 3.604256  | -0.849934 | 3.048184  |
| C  | 4.385871  | 0.184784  | 4.739419  |
| H  | 4.057551  | 1.190179  | 4.399092  |
| H  | 3.598828  | -0.230091 | 5.402791  |
| H  | 5.317028  | 0.291913  | 5.334128  |
| C  | 5.036723  | -2.137610 | 3.965577  |
| H  | 5.168282  | -2.786583 | 3.073482  |
| H  | 5.992387  | -2.104895 | 4.529508  |
| H  | 4.269159  | -2.601191 | 4.618589  |
| C  | 6.012756  | 0.982732  | -1.135941 |
| H  | 4.927559  | 0.925963  | -1.360073 |
| C  | 6.699338  | -0.040217 | -2.047151 |
| H  | 6.431188  | 0.153604  | -3.107880 |
| H  | 7.804083  | 0.011131  | -1.944650 |
| H  | 6.360870  | -1.066195 | -1.787547 |
| C  | 6.438512  | 2.411544  | -1.497994 |
| H  | 6.156396  | 2.633053  | -2.548085 |
| H  | 5.927957  | 3.139914  | -0.832512 |
| H  | 7.535688  | 2.549536  | -1.410213 |

|   |           |           |           |
|---|-----------|-----------|-----------|
| C | 2.345980  | -1.420608 | -3.600594 |
| H | 2.478461  | -0.548364 | -2.933459 |
| C | 1.935663  | -4.146886 | 0.832161  |
| H | 1.872351  | -3.137290 | 1.286553  |
| C | 0.653833  | -4.891069 | 1.227945  |
| H | -0.233812 | -4.366844 | 0.816569  |
| H | 0.657774  | -5.936110 | 0.854480  |
| H | 0.559988  | -4.927053 | 2.332631  |
| C | 3.170263  | -4.833638 | 1.423336  |
| H | 3.249850  | -5.883477 | 1.069235  |
| H | 4.090003  | -4.285284 | 1.128560  |
| H | 3.109849  | -4.834669 | 2.532835  |
| C | 1.087035  | -1.147371 | -4.432643 |
| H | 0.946364  | -1.918476 | -5.218736 |
| H | 0.194484  | -1.143380 | -3.772703 |
| H | 1.157850  | -0.156175 | -4.926014 |
| C | 3.600467  | -1.451812 | -4.482845 |
| H | 4.494035  | -1.677213 | -3.862202 |
| H | 3.515863  | -2.215565 | -5.283861 |
| H | 3.753322  | -0.460572 | -4.960604 |
| H | 1.062401  | 1.638066  | -2.666323 |
| H | 2.486372  | 1.834074  | -4.669820 |
| C | 1.856111  | 2.372639  | -2.681766 |
| C | 2.657275  | 2.482535  | -3.822029 |
| C | 2.075426  | 3.214149  | -1.575423 |
| C | 3.670177  | 3.441412  | -3.877321 |
| H | 4.285750  | 3.528047  | -4.763197 |
| C | 3.099703  | 4.174658  | -1.642037 |
| C | 3.886746  | 4.291113  | -2.790689 |
| H | 3.276992  | 4.847659  | -0.812333 |
| H | 4.669934  | 5.036724  | -2.835710 |
| C | -1.932455 | 1.132894  | 2.788193  |
| H | -1.176836 | 1.924281  | 2.670179  |
| C | -3.263454 | 1.673728  | 3.266686  |
| H | -3.879415 | 2.157026  | 2.490021  |
| H | -3.892387 | 0.885172  | 3.701461  |
| H | -3.123643 | 2.433208  | 4.057468  |
| B | -1.419572 | -0.086815 | 3.554223  |
| O | -2.268266 | -0.951530 | 4.233683  |
| O | -0.093178 | -0.478707 | 3.687250  |
| C | -0.052891 | -1.446113 | 4.763016  |
| C | -1.483604 | -2.065473 | 4.702054  |
| C | 1.066255  | -2.428488 | 4.517173  |
| H | 1.021405  | -2.851649 | 3.509503  |
| H | 2.032136  | -1.926409 | 4.626667  |
| H | 1.034878  | -3.253055 | 5.243312  |
| C | 0.189987  | -0.673563 | 6.050614  |
| H | -0.636641 | 0.017772  | 6.266592  |
| H | 0.311912  | -1.343373 | 6.913225  |
| H | 1.106815  | -0.077538 | 5.951746  |
| C | -2.030750 | -2.530850 | 6.033844  |
| H | -1.391084 | -3.310799 | 6.471845  |
| H | -2.110997 | -1.706040 | 6.752019  |
| H | -3.034344 | -2.958706 | 5.902538  |
| C | -1.583822 | -3.176685 | 3.669495  |
| H | -2.638333 | -3.431813 | 3.494678  |
| H | -1.142608 | -2.870551 | 2.710042  |
| H | -1.072831 | -4.090232 | 4.002976  |

170

Figure\_S7\_imid-3\_modeD\_ts(AS)\_06 / electronic energy: -4442.739372191179 a.u. / lowest freq: -246.64 cm-1

|    |           |          |           |
|----|-----------|----------|-----------|
| C  | -0.258536 | 3.783467 | -0.223958 |
| H  | -0.513920 | 4.106599 | -1.244521 |
| C  | 1.129088  | 3.115197 | -0.136074 |
| H  | 1.737597  | 3.500305 | 0.697850  |
| C  | -0.538880 | 1.493953 | 0.318911  |
| C  | -2.586186 | 2.811387 | 0.052496  |
| C  | -3.269490 | 3.282375 | 1.175531  |
| C  | -3.306933 | 2.564867 | -1.132517 |
| C  | -4.644224 | 3.505474 | 1.139649  |
| H  | -2.707211 | 3.474834 | 2.090238  |
| C  | -4.685310 | 2.782900 | -1.159930 |
| C  | -5.353645 | 3.255029 | -0.031158 |
| H  | -5.156607 | 3.869677 | 2.033028  |
| H  | -5.220917 | 2.592768 | -2.091649 |
| H  | -6.431687 | 3.426600 | -0.070940 |
| S  | -2.493013 | 2.085848 | -2.666287 |
| O  | -3.592113 | 1.932729 | -3.666716 |
| O  | -1.841515 | 0.767091 | -2.420569 |
| O  | -1.562926 | 3.190244 | -2.963472 |
| Cu | -1.680844 | 0.090529 | 1.192935  |
| C  | -0.422209 | 4.935877 | 0.736708  |
| C  | -0.776243 | 6.208917 | 0.256573  |
| C  | -0.237255 | 4.754821 | 2.120597  |
| C  | -0.943599 | 7.277090 | 1.143029  |
| H  | -0.925722 | 6.376191 | -0.802810 |
| C  | -0.407009 | 5.825292 | 3.002752  |
| H  | 0.031336  | 3.783937 | 2.515853  |
| C  | -0.759833 | 7.085513 | 2.514577  |

|    |           |           |           |
|----|-----------|-----------|-----------|
| H  | -1.217217 | 8.254090  | 0.766148  |
| H  | -0.266239 | 5.677108  | 4.065573  |
| H  | -0.891093 | 7.913588  | 3.199000  |
| N  | -1.166959 | 2.664285  | 0.112655  |
| N  | 0.780474  | 1.700044  | 0.160820  |
| C  | -3.114839 | -1.354497 | 1.322398  |
| C  | -4.351117 | -0.981078 | 2.002342  |
| C  | -4.758330 | -1.707091 | 3.136630  |
| C  | -5.165336 | 0.079226  | 1.565755  |
| C  | -5.932438 | -1.386453 | 3.808485  |
| C  | -6.338392 | 0.402268  | 2.241178  |
| C  | -6.728532 | -0.327879 | 3.366057  |
| H  | -6.229606 | -1.964580 | 4.686908  |
| H  | -6.951919 | 1.236105  | 1.888755  |
| H  | -7.649139 | -0.071992 | 3.895907  |
| C  | -2.830527 | -1.077695 | -0.047278 |
| C  | -1.899028 | -1.829913 | -0.782368 |
| H  | -1.545651 | -1.424394 | -1.729149 |
| H  | -1.205592 | -2.486784 | -0.253962 |
| H  | -4.863345 | 0.668660  | 0.694441  |
| H  | -3.445796 | -0.364551 | -0.609391 |
| P  | -3.323443 | -2.981009 | -2.969231 |
| O  | -4.422093 | -1.755912 | -2.815329 |
| O  | -2.420241 | -2.481795 | -4.060119 |
| O  | -4.210406 | -4.274687 | -3.375546 |
| O  | -2.790129 | -3.350377 | -1.575362 |
| Na | -3.014155 | -0.280433 | -4.304211 |
| H  | -2.604022 | -2.222083 | 1.758571  |
| H  | -4.125535 | -2.521651 | 3.496901  |
| C  | -5.489964 | -1.871464 | -1.887944 |
| H  | -5.846359 | -0.860313 | -1.652413 |
| H  | -6.321482 | -2.452180 | -2.315355 |
| H  | -5.159462 | -2.357859 | -0.957303 |
| C  | -4.749255 | -4.349351 | -4.686912 |
| H  | -5.252605 | -5.317768 | -4.779903 |
| H  | -5.487091 | -3.551195 | -4.865282 |
| H  | -3.960794 | -4.278953 | -5.449455 |
| C  | 1.736566  | 0.648558  | 0.102083  |
| C  | 3.045711  | 0.840749  | 0.581763  |
| C  | 1.441713  | -0.526268 | -0.606840 |
| C  | 4.039837  | -0.120031 | 0.338389  |
| C  | 2.433536  | -1.481838 | -0.863312 |
| C  | 3.728728  | -1.280259 | -0.378280 |
| H  | 4.507387  | -2.000124 | -0.602109 |
| H  | 0.470930  | -0.644300 | -1.053389 |
| H  | 3.305821  | 1.753113  | 1.103018  |
| C  | 2.151085  | -2.642270 | -1.735409 |
| C  | 2.129170  | -4.026285 | -1.172027 |
| C  | 1.998320  | -2.493601 | -3.137523 |
| C  | 1.987018  | -5.095127 | -2.073047 |
| C  | 1.822387  | -3.653838 | -3.920407 |
| C  | 1.830259  | -4.885892 | -3.387585 |
| H  | 1.991948  | -6.115924 | -1.713731 |
| H  | 1.696088  | -3.568244 | -4.991961 |
| H  | 1.709241  | -5.740236 | -4.042503 |
| C  | 5.441791  | 0.132404  | 0.731013  |
| C  | 6.349402  | 0.712386  | -0.200919 |
| C  | 5.917671  | -0.278499 | 2.005071  |
| C  | 7.701376  | 0.865340  | 0.171806  |
| C  | 7.272548  | -0.060241 | 2.315860  |
| C  | 8.137549  | 0.505888  | 1.383391  |
| H  | 8.419663  | 1.275592  | -0.525417 |
| H  | 7.675170  | -0.353387 | 3.276430  |
| H  | 9.180776  | 0.642154  | 1.639788  |
| C  | 5.029105  | -0.990433 | 3.021408  |
| H  | 3.993433  | -1.097407 | 2.638853  |
| C  | 4.926879  | -0.186184 | 4.323752  |
| H  | 4.550261  | 0.836557  | 4.107888  |
| H  | 4.216808  | -0.675473 | 5.022444  |
| H  | 5.911564  | -0.108182 | 4.830249  |
| C  | 5.544035  | -2.412970 | 3.284669  |
| H  | 5.587635  | -2.980851 | 2.330645  |
| H  | 6.556137  | -2.398852 | 3.740496  |
| H  | 4.865571  | -2.953067 | 3.975883  |
| C  | 5.916381  | 1.129760  | -1.606812 |
| H  | 4.814659  | 1.064390  | -1.722303 |
| C  | 6.520974  | 0.193005  | -2.658054 |
| H  | 6.143382  | 0.459484  | -3.668480 |
| H  | 7.629579  | 0.260848  | -2.663620 |
| H  | 6.225746  | -0.856725 | -2.444756 |
| C  | 6.280854  | 2.590670  | -1.901353 |
| H  | 5.883976  | 2.883908  | -2.895255 |
| H  | 5.835691  | 3.255734  | -1.130969 |
| H  | 7.379080  | 2.745720  | -1.921164 |
| C  | 2.053994  | -1.133738 | -3.830342 |
| H  | 2.233885  | -0.320900 | -3.101443 |
| C  | 2.245179  | -4.295085 | 0.320665  |
| H  | 2.238866  | -3.337881 | 0.880068  |

|   |           |           |           |
|---|-----------|-----------|-----------|
| C | 1.051284  | -5.109705 | 0.836599  |
| H | 0.101387  | -4.585454 | 0.599675  |
| H | 1.023135  | -6.123297 | 0.385916  |
| H | 1.123242  | -5.233247 | 1.936582  |
| C | 3.567636  | -4.996229 | 0.647726  |
| H | 3.609583  | -6.004878 | 0.184472  |
| H | 4.422018  | -4.393661 | 0.272911  |
| H | 3.678189  | -5.104582 | 1.748048  |
| C | 0.720456  | -0.818172 | -4.518197 |
| H | 0.512120  | -1.531394 | -5.342708 |
| H | -0.106383 | -0.872784 | -3.780028 |
| H | 0.737489  | 0.207148  | -4.941409 |
| C | 3.220799  | -1.062352 | -4.823106 |
| H | 4.171542  | -1.318941 | -4.308722 |
| H | 3.072312  | -1.759457 | -5.674237 |
| H | 3.313944  | -0.031590 | -5.226793 |
| H | 0.815294  | 1.796496  | -2.546449 |
| H | 2.034563  | 2.205315  | -4.651515 |
| C | 1.592821  | 2.547538  | -2.571113 |
| C | 2.277942  | 2.777993  | -3.767662 |
| C | 1.906462  | 3.290651  | -1.418164 |
| C | 3.267536  | 3.760369  | -3.830645 |
| H | 3.793041  | 3.940531  | -4.759417 |
| C | 2.907737  | 4.274530  | -1.492669 |
| C | 3.577805  | 4.512107  | -2.695600 |
| H | 3.156178  | 4.873134  | -0.625047 |
| H | 4.343357  | 5.275481  | -2.746028 |
| C | -1.528008 | 0.703314  | 3.145091  |
| H | -0.798971 | 1.519870  | 3.031255  |
| C | -2.816130 | 1.161720  | 3.796208  |
| H | -3.512556 | 1.702579  | 3.133946  |
| H | -3.387151 | 0.318427  | 4.208041  |
| H | -2.613509 | 1.844123  | 4.641996  |
| B | -0.927511 | -0.567563 | 3.741237  |
| O | -1.696334 | -1.524571 | 4.392326  |
| O | 0.415589  | -0.925117 | 3.731427  |
| C | 0.564711  | -2.005683 | 4.681325  |
| C | -0.850606 | -2.659059 | 4.657471  |
| C | 1.683904  | -2.914906 | 4.235588  |
| H | 1.573748  | -3.207012 | 3.187204  |
| H | 2.643306  | -2.399236 | 4.339902  |
| H | 1.725844  | -3.825047 | 4.850558  |
| C | 0.891882  | -1.379149 | 6.028343  |
| H | 0.068257  | -0.745591 | 6.386951  |
| H | 1.098143  | -2.139812 | 6.794156  |
| H | 1.783660  | -0.745976 | 5.930219  |
| C | -1.274890 | -3.302879 | 5.959567  |
| H | -0.580343 | -4.105536 | 6.247545  |
| H | -1.321190 | -2.575248 | 6.778784  |
| H | -2.273301 | -3.749762 | 5.854243  |
| C | -1.008828 | -3.636102 | 3.504043  |
| H | -2.067337 | -3.905186 | 3.383151  |
| H | -0.657536 | -3.194623 | 2.559807  |
| H | -0.450332 | -4.565722 | 3.678153  |

170

Figure\_S7\_imid-3\_modeD\_prod(AS) / electronic energy: -4442.755071742211 a.u. / lowest freq: 10.93 cm-1

|    |           |           |           |
|----|-----------|-----------|-----------|
| C  | 0.469581  | 0.109625  | 3.311199  |
| H  | 0.736396  | -0.865138 | 3.741968  |
| C  | -0.997872 | 0.176207  | 2.828871  |
| H  | -1.506860 | 1.094890  | 3.161791  |
| C  | 0.431928  | 0.328959  | 0.965027  |
| C  | 2.638762  | 0.351641  | 1.923585  |
| C  | 3.158973  | 1.493096  | 1.306081  |
| C  | 3.513661  | -0.679235 | 2.309652  |
| C  | 4.520659  | 1.622321  | 1.050807  |
| H  | 2.463906  | 2.287906  | 1.029353  |
| C  | 4.882051  | -0.532050 | 2.069541  |
| C  | 5.388166  | 0.604315  | 1.441160  |
| H  | 4.885432  | 2.515139  | 0.538305  |
| H  | 5.543990  | -1.348875 | 2.363062  |
| H  | 6.460668  | 0.687899  | 1.253622  |
| S  | 2.963161  | -2.208758 | 3.085274  |
| O  | 4.074983  | -3.175880 | 2.878680  |
| O  | 1.749850  | -2.624261 | 2.316018  |
| O  | 2.699461  | -1.868655 | 4.494112  |
| Cu | 1.336612  | 0.593344  | -0.791004 |
| C  | 0.810539  | 1.206415  | 4.288275  |
| C  | 1.158632  | 0.891095  | 5.613351  |
| C  | 0.779990  | 2.557762  | 3.892776  |
| C  | 1.480982  | 1.905055  | 6.520078  |
| H  | 1.173889  | -0.137536 | 5.949494  |
| C  | 1.101574  | 3.567690  | 4.804238  |
| H  | 0.509006  | 2.827818  | 2.879489  |
| C  | 1.454116  | 3.241670  | 6.115669  |
| H  | 1.748935  | 1.654203  | 7.538270  |
| H  | 1.075563  | 4.604265  | 4.495960  |
| H  | 1.702745  | 4.025131  | 6.819769  |
| N  | 1.223435  | 0.276858  | 2.045973  |

|    |           |           |           |
|----|-----------|-----------|-----------|
| N  | -0.840770 | 0.236742  | 1.356333  |
| C  | 2.614156  | 0.158040  | -2.434318 |
| C  | 3.475005  | 1.135670  | -3.078833 |
| C  | 3.012361  | 1.791468  | -4.235948 |
| C  | 4.759115  | 1.454305  | -2.597827 |
| C  | 3.796363  | 2.741319  | -4.881054 |
| C  | 5.544252  | 2.396108  | -3.249316 |
| C  | 5.065931  | 3.047625  | -4.389350 |
| H  | 3.419700  | 3.239133  | -5.777349 |
| H  | 6.541851  | 2.625972  | -2.867495 |
| H  | 5.686797  | 3.789062  | -4.897683 |
| C  | 2.955176  | -0.645893 | -1.315763 |
| C  | 2.015868  | -1.499452 | -0.763026 |
| H  | 2.172318  | -2.006676 | 0.191546  |
| H  | 1.205779  | -1.881645 | -1.389705 |
| H  | 5.149852  | 0.956800  | -1.706627 |
| H  | 3.874164  | -0.430256 | -0.756266 |
| P  | 2.569671  | -4.852153 | -1.439084 |
| O  | 3.783072  | -4.106324 | -0.542237 |
| O  | 1.761238  | -5.494715 | -0.334688 |
| O  | 3.433369  | -5.988609 | -2.261495 |
| O  | 2.025396  | -3.916185 | -2.472749 |
| Na | 2.698627  | -4.736529 | 1.577964  |
| H  | 1.767931  | -0.197065 | -3.039384 |
| H  | 2.025757  | 1.536691  | -4.633742 |
| C  | 4.808993  | -3.421982 | -1.221855 |
| H  | 5.290828  | -2.727397 | -0.518884 |
| H  | 5.575958  | -4.115231 | -1.606222 |
| H  | 4.409761  | -2.847648 | -2.074184 |
| C  | 3.990783  | -7.066441 | -1.545142 |
| H  | 4.493424  | -7.728035 | -2.262341 |
| H  | 4.739525  | -6.728920 | -0.807635 |
| H  | 3.221375  | -7.645952 | -1.011333 |
| C  | -1.927934 | 0.118329  | 0.452579  |
| C  | -3.147752 | 0.760298  | 0.716747  |
| C  | -1.816142 | -0.692043 | -0.687011 |
| C  | -4.235688 | 0.595102  | -0.149924 |
| C  | -2.904633 | -0.866933 | -1.549493 |
| C  | -4.118359 | -0.228471 | -1.274861 |
| H  | -4.962461 | -0.358759 | -1.942341 |
| H  | -0.893772 | -1.212465 | -0.888582 |
| H  | -3.250869 | 1.399474  | 1.584312  |
| C  | -2.770751 | -1.743316 | -2.730909 |
| C  | -2.617579 | -1.176115 | -4.028917 |
| C  | -2.738724 | -3.157187 | -2.562522 |
| C  | -2.417523 | -2.034939 | -5.125120 |
| C  | -2.531106 | -3.970765 | -3.691385 |
| C  | -2.373342 | -3.413832 | -4.955122 |
| H  | -2.283878 | -1.636838 | -6.122343 |
| H  | -2.489109 | -5.047802 | -3.596962 |
| H  | -2.213769 | -4.057082 | -5.811015 |
| C  | -5.495919 | 1.315646  | 0.101987  |
| C  | -6.510937 | 0.717210  | 0.898376  |
| C  | -5.700015 | 2.601715  | -0.471541 |
| C  | -7.714528 | 1.417706  | 1.099894  |
| C  | -6.916813 | 3.265403  | -0.232007 |
| C  | -7.910522 | 2.677391  | 0.543424  |
| H  | -8.512299 | 0.987910  | 1.691137  |
| H  | -7.104071 | 4.244913  | -0.652027 |
| H  | -8.842517 | 3.201507  | 0.712217  |
| C  | -4.642251 | 3.279845  | -1.343876 |
| H  | -3.742175 | 2.643332  | -1.449758 |
| C  | -4.157858 | 4.589851  | -0.711636 |
| H  | -3.781197 | 4.397007  | 0.315819  |
| H  | -3.324433 | 5.015522  | -1.310597 |
| H  | -4.974272 | 5.340625  | -0.661973 |
| C  | -5.161936 | 3.509099  | -2.767859 |
| H  | -5.513954 | 2.548379  | -3.201125 |
| H  | -5.999038 | 4.238345  | -2.779775 |
| H  | -4.345036 | 3.899695  | -3.411853 |
| C  | -6.340640 | -0.666133 | 1.527615  |
| H  | -5.334936 | -1.083458 | 1.315447  |
| C  | -7.347265 | -1.662718 | 0.941515  |
| H  | -7.150980 | -2.680907 | 1.340649  |
| H  | -8.390083 | -1.378924 | 1.196630  |
| H  | -7.243496 | -1.699013 | -0.164248 |
| C  | -6.454406 | -0.601076 | 3.055543  |
| H  | -6.247027 | -1.600547 | 3.493199  |
| H  | -5.710675 | 0.118284  | 3.460365  |
| H  | -7.470219 | -0.287648 | 3.374760  |
| C  | -2.921915 | -3.820885 | -1.196162 |
| H  | -3.132497 | -3.070178 | -0.407891 |
| C  | -2.629794 | 0.334026  | -4.269519 |
| H  | -2.830961 | 0.886762  | -3.333408 |
| C  | -1.264478 | 0.822836  | -4.767687 |
| H  | -0.470670 | 0.516913  | -4.053773 |
| H  | -1.027527 | 0.405759  | -5.769037 |
| H  | -1.258214 | 1.931837  | -4.835467 |

|   |           |           |           |
|---|-----------|-----------|-----------|
| C | -3.750235 | 0.738882  | -5.235320 |
| H | -3.576468 | 0.331023  | -6.252977 |
| H | -4.727311 | 0.367272  | -4.858766 |
| H | -3.806291 | 1.846177  | -5.308018 |
| C | -1.643767 | -4.550800 | -0.767378 |
| H | -1.396163 | -5.375760 | -1.467918 |
| H | -0.792836 | -3.837633 | -0.736382 |
| H | -1.771068 | -4.979675 | 0.248630  |
| C | -4.128362 | -4.768197 | -1.191424 |
| H | -5.038089 | -4.225024 | -1.526188 |
| H | -3.962645 | -5.640572 | -1.857606 |
| H | -4.310181 | -5.144859 | -0.161959 |
| H | -0.836540 | -2.425283 | 1.925941  |
| H | -2.188609 | -4.356264 | 2.642784  |
| C | -1.588277 | -2.289223 | 2.691837  |
| C | -2.357954 | -3.385719 | 3.089674  |
| C | -1.807110 | -1.021101 | 3.263075  |
| C | -3.346731 | -3.230784 | 4.063602  |
| H | -3.942028 | -4.080914 | 4.370455  |
| C | -2.806413 | -0.876764 | 4.241083  |
| C | -3.567349 | -1.978682 | 4.641747  |
| H | -2.996165 | 0.087316  | 4.696217  |
| H | -4.333681 | -1.859922 | 5.396731  |
| C | 0.753189  | 2.392064  | -1.525685 |
| H | 1.025388  | 2.247993  | -2.583668 |
| C | -0.733497 | 2.609097  | -1.373843 |
| H | -1.035128 | 2.747640  | -0.325064 |
| H | -1.054800 | 3.525918  | -1.899024 |
| H | -1.340620 | 1.799217  | -1.798637 |
| B | 1.609646  | 3.545419  | -0.948040 |
| O | 1.032027  | 4.590733  | -0.261575 |
| O | 2.966994  | 3.725411  | -1.114587 |
| C | 3.238781  | 5.126268  | -0.857401 |
| C | 2.075207  | 5.523123  | 0.114458  |
| C | 4.626074  | 5.275873  | -0.274302 |
| H | 4.750277  | 4.718478  | 0.661951  |
| H | 5.377361  | 4.913201  | -0.989621 |
| H | 4.846579  | 6.332905  | -0.066812 |
| C | 3.153363  | 5.838710  | -2.199510 |
| H | 2.155065  | 5.735172  | -2.648860 |
| H | 3.379002  | 6.910102  | -2.111488 |
| H | 3.878271  | 5.394124  | -2.894208 |
| C | 1.556430  | 6.932881  | -0.073532 |
| H | 2.352739  | 7.669531  | 0.104932  |
| H | 1.159932  | 7.092315  | -1.083128 |
| H | 0.747684  | 7.137243  | 0.640756  |
| C | 2.400486  | 5.279552  | 1.577666  |
| H | 1.481856  | 5.377637  | 2.170257  |
| H | 2.810069  | 4.275466  | 1.752864  |
| H | 3.126970  | 6.009506  | 1.959745  |

66

Figure\_S8\_imid-2-Cu-H / electronic energy: -2884.087226671726 a.u. / lowest freq: 26.36 cm<sup>-1</sup>

|    |           |           |           |
|----|-----------|-----------|-----------|
| C  | 0.618428  | 1.397213  | 0.194580  |
| H  | 0.960404  | 1.185433  | 1.221721  |
| C  | -0.914970 | 1.396045  | 0.050953  |
| H  | -1.246677 | 2.084311  | -0.744739 |
| C  | -0.055055 | -0.627110 | -0.810741 |
| C  | 2.330388  | -0.194817 | -0.850743 |
| C  | 2.927746  | 0.151511  | -2.066065 |
| C  | 3.072470  | -0.924728 | 0.094205  |
| C  | 4.246800  | -0.198018 | -2.341790 |
| H  | 2.332734  | 0.692753  | -2.804177 |
| C  | 4.395320  | -1.271469 | -0.188574 |
| C  | 4.985102  | -0.904912 | -1.395930 |
| H  | 4.693520  | 0.080648  | -3.298331 |
| H  | 4.953010  | -1.843662 | 0.554725  |
| H  | 6.021654  | -1.182042 | -1.599210 |
| C  | -2.452011 | -0.453687 | -0.759021 |
| C  | -3.044345 | -0.008396 | -1.969843 |
| C  | -3.190249 | -1.304746 | 0.099903  |
| C  | -4.373569 | -0.350154 | -2.258769 |
| C  | -4.515227 | -1.634245 | -0.217771 |
| C  | -5.114007 | -1.153225 | -1.385012 |
| S  | 2.389069  | -1.449653 | 1.677396  |
| O  | 3.305869  | -2.524235 | 2.148747  |
| O  | 1.047313  | -2.036702 | 1.354652  |
| O  | 2.335152  | -0.247816 | 2.525823  |
| Cu | 0.349636  | -2.497505 | -1.046443 |
| C  | 1.274219  | 2.661119  | -0.302441 |
| C  | 2.046935  | 3.443406  | 0.574230  |
| C  | 1.139283  | 3.070376  | -1.642497 |
| C  | 2.669562  | 4.609734  | 0.119488  |
| H  | 2.169431  | 3.152051  | 1.609994  |
| C  | 1.764358  | 4.236583  | -2.092643 |
| H  | 0.559020  | 2.482900  | -2.341138 |
| C  | 2.528595  | 5.005966  | -1.212516 |
| H  | 3.262889  | 5.206193  | 0.800400  |
| H  | 1.657937  | 4.542543  | -3.125342 |



|    |           |           |           |
|----|-----------|-----------|-----------|
| H  | 3.012543  | 5.908429  | -1.562882 |
| C  | -1.646596 | 1.743481  | 1.324673  |
| C  | -2.593660 | 2.784303  | 1.328104  |
| C  | -1.412892 | 1.034397  | 2.518651  |
| C  | -3.290163 | 3.105226  | 2.497015  |
| H  | -2.798588 | 3.346946  | 0.425789  |
| C  | -2.112409 | 1.358509  | 3.684318  |
| H  | -0.691235 | 0.229994  | 2.551691  |
| C  | -3.050414 | 2.392691  | 3.673783  |
| H  | -4.017760 | 3.906480  | 2.489708  |
| H  | -1.927119 | 0.806389  | 4.596577  |
| H  | -3.591322 | 2.642094  | 4.577445  |
| N  | 0.982972  | 0.215740  | -0.622759 |
| N  | -1.163192 | -0.000599 | -0.375165 |
| Na | 1.720123  | -4.281511 | 1.164070  |
| H  | 0.717182  | -4.022093 | -1.171190 |
| C  | -2.297567 | 0.812829  | -2.988439 |
| H  | -2.413391 | 0.355465  | -3.993900 |
| H  | -2.712476 | 1.842199  | -3.012436 |
| H  | -1.211815 | 0.866751  | -2.784249 |
| C  | -2.607027 | -1.886604 | 1.358092  |
| H  | -2.724606 | -2.990798 | 1.346977  |
| H  | -1.528537 | -1.672415 | 1.462079  |
| H  | -3.141008 | -1.476413 | 2.240868  |
| C  | -6.536782 | -1.517043 | -1.694119 |
| H  | -6.631426 | -2.620689 | -1.771323 |
| H  | -7.199577 | -1.152245 | -0.881333 |
| H  | -6.875615 | -1.067327 | -2.651656 |
| H  | -5.084742 | -2.272506 | 0.448627  |
| H  | -4.829033 | 0.005972  | -3.175770 |

92

Figure\_S8\_imid-2\_modeS1\_ed(CuHadd) / electronic energy: -3372.985295587232 a.u. / lowest freq: 19.76 cm<sup>-1</sup>

|    |           |           |           |
|----|-----------|-----------|-----------|
| C  | 2.501782  | 0.080516  | 0.237398  |
| H  | 2.454064  | -0.282579 | 1.275852  |
| C  | 2.031235  | 1.534268  | 0.065652  |
| H  | 2.539214  | 2.012930  | -0.790012 |
| C  | 0.359264  | 0.104889  | -0.760875 |
| C  | 1.478119  | -2.031429 | -0.792425 |
| C  | 1.608824  | -2.439362 | -2.123796 |
| C  | 1.335149  | -2.996753 | 0.216188  |
| C  | 1.610635  | -3.791165 | -2.456150 |
| H  | 1.692894  | -1.670236 | -2.894558 |
| C  | 1.350765  | -4.351629 | -0.124252 |
| C  | 1.491567  | -4.750059 | -1.451267 |
| H  | 1.706823  | -4.092941 | -3.501268 |
| H  | 1.220390  | -5.088952 | 0.670046  |
| H  | 1.496662  | -5.813364 | -1.700206 |
| C  | -0.202618 | 2.443779  | -0.699755 |
| C  | -0.089915 | 2.989236  | -2.008181 |
| C  | -1.085978 | 3.052370  | 0.227267  |
| C  | -0.848294 | 4.116439  | -2.356491 |
| C  | -1.823126 | 4.183751  | -0.149117 |
| C  | -1.712332 | 4.715285  | -1.436869 |
| S  | 1.046246  | -2.570190 | 1.939650  |
| O  | 0.292447  | -3.736383 | 2.490243  |
| O  | 0.168738  | -1.360515 | 1.914761  |
| O  | 2.370573  | -2.349237 | 2.545767  |
| Cu | -0.935814 | -0.802233 | -1.968580 |
| C  | 3.883802  | -0.170705 | -0.313064 |
| C  | 4.923651  | -0.562091 | 0.548895  |
| C  | 4.155038  | -0.026271 | -1.686985 |
| C  | 6.205802  | -0.803947 | 0.046635  |
| H  | 4.745027  | -0.677411 | 1.610503  |
| C  | 5.438093  | -0.270278 | -2.184501 |
| H  | 3.373371  | 0.267834  | -2.373968 |
| C  | 6.462818  | -0.658597 | -1.318615 |
| H  | 7.000882  | -1.104128 | 0.716838  |
| H  | 5.637516  | -0.159237 | -3.242482 |
| H  | 7.455930  | -0.846909 | -1.705489 |
| C  | 2.233927  | 2.397273  | 1.288583  |
| C  | 2.885013  | 3.639032  | 1.164861  |
| C  | 1.789941  | 1.989573  | 2.561785  |
| C  | 3.082504  | 4.452162  | 2.284632  |
| H  | 3.237338  | 3.983698  | 0.200584  |
| C  | 1.991534  | 2.805575  | 3.678570  |
| H  | 1.275791  | 1.048720  | 2.695672  |
| C  | 2.636567  | 4.035839  | 3.540367  |
| H  | 3.581782  | 5.406536  | 2.178080  |
| H  | 1.642442  | 2.485124  | 4.651621  |
| H  | 2.789688  | 4.667131  | 4.406046  |
| N  | 1.461257  | -0.633953 | -0.529057 |
| N  | 0.601924  | 1.346582  | -0.290937 |
| C  | -2.048852 | -2.344464 | -1.151498 |
| C  | -2.046607 | -2.357955 | -2.560995 |
| H  | -2.914883 | -1.982925 | -3.111860 |
| B  | -3.176717 | -1.631317 | -0.408662 |
| O  | -4.197251 | -0.977575 | -1.060798 |
| O  | -3.318026 | -1.551617 | 0.973790  |

|    |           |           |           |
|----|-----------|-----------|-----------|
| C  | -4.882661 | -0.163610 | -0.082759 |
| C  | -4.624201 | -0.957607 | 1.238189  |
| C  | -4.192632 | 1.189207  | -0.096471 |
| H  | -4.262802 | 1.628137  | -1.100438 |
| H  | -4.633878 | 1.897897  | 0.617142  |
| H  | -3.126379 | 1.065958  | 0.135309  |
| C  | -6.339436 | -0.039063 | -0.465471 |
| H  | -6.902140 | 0.502452  | 0.308304  |
| H  | -6.435764 | 0.524295  | -1.402729 |
| H  | -6.808883 | -1.018604 | -0.613136 |
| C  | -5.605103 | -2.100159 | 1.433445  |
| H  | -6.606245 | -1.730550 | 1.693391  |
| H  | -5.691190 | -2.715786 | 0.527732  |
| H  | -5.267512 | -2.748906 | 2.252982  |
| C  | -4.532270 | -0.102658 | 2.481325  |
| H  | -3.701389 | 0.609577  | 2.426174  |
| H  | -5.461428 | 0.464949  | 2.631648  |
| H  | -4.384810 | -0.727072 | 3.373990  |
| Na | -1.787949 | -2.399255 | 2.523082  |
| H  | -1.405523 | -3.043515 | -3.125344 |
| H  | -1.334013 | -2.981112 | -0.613085 |
| H  | -0.613808 | -0.266384 | -3.422937 |
| C  | -1.264997 | 2.535112  | 1.628599  |
| H  | -0.725347 | 3.196158  | 2.337227  |
| H  | -2.339469 | 2.545493  | 1.904509  |
| H  | -0.907051 | 1.492313  | 1.736967  |
| C  | 0.827911  | 2.426224  | -3.062708 |
| H  | 0.245489  | 2.204275  | -3.981515 |
| H  | 1.609618  | 3.175111  | -3.309071 |
| H  | 1.330475  | 1.492372  | -2.756890 |
| C  | -2.509565 | 5.920464  | -1.841945 |
| H  | -3.149838 | 6.286137  | -1.011094 |
| H  | -1.821855 | 6.739063  | -2.141725 |
| H  | -3.163577 | 5.662944  | -2.701550 |
| H  | -0.762241 | 4.534630  | -3.353324 |
| H  | -2.491905 | 4.648112  | 0.566552  |

92

Figure\_S8\_imid-2\_modeS1\_ts(CuHadd) / electronic energy: -3372.973372247575 a.u. / lowest freq: -703.95 cm-1

|    |           |           |           |
|----|-----------|-----------|-----------|
| C  | 2.545261  | 0.064208  | 0.204399  |
| H  | 2.503680  | -0.272128 | 1.252647  |
| C  | 2.082408  | 1.516666  | -0.000413 |
| H  | 2.556119  | 1.953247  | -0.897703 |
| C  | 0.381083  | 0.081935  | -0.734469 |
| C  | 1.476935  | -2.058210 | -0.776359 |
| C  | 1.580253  | -2.485828 | -2.104050 |
| C  | 1.317894  | -3.005955 | 0.246335  |
| C  | 1.547012  | -3.840857 | -2.419606 |
| H  | 1.682459  | -1.729740 | -2.885325 |
| C  | 1.300871  | -4.365485 | -0.077698 |
| C  | 1.417581  | -4.783678 | -1.400538 |
| H  | 1.626372  | -4.158526 | -3.461374 |
| H  | 1.165312  | -5.090150 | 0.727270  |
| H  | 1.396829  | -5.850043 | -1.635287 |
| C  | -0.181570 | 2.417005  | -0.689631 |
| C  | -0.161288 | 2.893844  | -2.029349 |
| C  | -1.012174 | 3.062523  | 0.260743  |
| C  | -0.952030 | 3.996838  | -2.382968 |
| C  | -1.777638 | 4.173006  | -0.120914 |
| C  | -1.755406 | 4.639741  | -1.438234 |
| S  | 1.069013  | -2.553616 | 1.972336  |
| O  | 0.284184  | -3.694833 | 2.533196  |
| O  | 0.231601  | -1.317040 | 1.954788  |
| O  | 2.408417  | -2.374226 | 2.557276  |
| Cu | -1.002899 | -0.846674 | -1.685896 |
| C  | 3.918747  | -0.210460 | -0.354759 |
| C  | 4.964871  | -0.589744 | 0.504864  |
| C  | 4.175312  | -0.101322 | -1.734872 |
| C  | 6.238967  | -0.855374 | -0.005830 |
| H  | 4.797223  | -0.677392 | 1.571008  |
| C  | 5.450328  | -0.369287 | -2.240692 |
| H  | 3.388100  | 0.184152  | -2.419918 |
| C  | 6.481415  | -0.745967 | -1.377135 |
| H  | 7.039058  | -1.146321 | 0.662479  |
| H  | 5.638580  | -0.285920 | -3.303251 |
| H  | 7.468232  | -0.953002 | -1.770499 |
| C  | 2.350564  | 2.426739  | 1.174658  |
| C  | 2.993342  | 3.661498  | 0.965205  |
| C  | 1.975589  | 2.072408  | 2.485562  |
| C  | 3.249920  | 4.519807  | 2.038158  |
| H  | 3.293078  | 3.965801  | -0.029946 |
| C  | 2.236030  | 2.933829  | 3.555164  |
| H  | 1.469913  | 1.138602  | 2.686344  |
| C  | 2.871927  | 4.156393  | 3.331956  |
| H  | 3.742068  | 5.468237  | 1.865628  |
| H  | 1.939674  | 2.654605  | 4.557932  |
| H  | 3.070589  | 4.822785  | 4.161305  |
| N  | 1.493065  | -0.656536 | -0.535084 |
| N  | 0.638642  | 1.330769  | -0.285208 |

|    |           |           |           |
|----|-----------|-----------|-----------|
| C  | -2.308510 | -2.392581 | -1.279437 |
| C  | -2.158073 | -2.155178 | -2.697858 |
| H  | -3.004616 | -1.701610 | -3.224363 |
| B  | -3.351928 | -1.651559 | -0.486192 |
| O  | -4.311508 | -0.825970 | -1.054774 |
| O  | -3.483013 | -1.669646 | 0.912655  |
| C  | -4.865018 | -0.015366 | -0.002316 |
| C  | -4.682733 | -0.929935 | 1.253284  |
| C  | -4.014679 | 1.241517  | 0.066584  |
| H  | -4.037830 | 1.753845  | -0.904851 |
| H  | -4.362716 | 1.948635  | 0.831730  |
| H  | -2.969060 | 0.974133  | 0.276855  |
| C  | -6.303126 | 0.320873  | -0.327791 |
| H  | -6.773470 | 0.873224  | 0.498497  |
| H  | -6.349217 | 0.957127  | -1.221730 |
| H  | -6.899670 | -0.578023 | -0.525642 |
| C  | -5.810057 | -1.936067 | 1.410782  |
| H  | -6.745806 | -1.452155 | 1.722522  |
| H  | -5.997699 | -2.476046 | 0.472453  |
| H  | -5.544176 | -2.675214 | 2.178659  |
| C  | -4.440695 | -0.183597 | 2.547385  |
| H  | -3.529125 | 0.425357  | 2.503710  |
| H  | -5.284883 | 0.480087  | 2.782654  |
| H  | -4.337565 | -0.888448 | 3.385521  |
| Na | -1.799812 | -2.441411 | 2.287660  |
| H  | -1.648362 | -2.907159 | -3.309724 |
| H  | -1.682920 | -3.171236 | -0.823482 |
| H  | -1.093219 | -0.961112 | -3.271785 |
| C  | -1.120073 | 2.593869  | 1.686792  |
| H  | -0.567303 | 3.292360  | 2.348087  |
| H  | -2.182485 | 2.584547  | 2.007241  |
| H  | -0.733019 | 1.564428  | 1.817439  |
| C  | 0.677984  | 2.273794  | -3.117908 |
| H  | 0.018060  | 1.935558  | -3.944526 |
| H  | 1.387698  | 3.030621  | -3.513344 |
| H  | 1.267153  | 1.401786  | -2.785207 |
| C  | -2.588482 | 5.817959  | -1.850277 |
| H  | -3.173688 | 6.223913  | -0.997838 |
| H  | -1.929700 | 6.622818  | -2.239033 |
| H  | -3.297314 | 5.512179  | -2.648454 |
| H  | -0.939348 | 4.361211  | -3.404279 |
| H  | -2.405397 | 4.666408  | 0.612221  |

92

Figure\_S8\_imid-2\_modeS1\_prod(CuHadd) / electronic energy: -3373.016852320262 a.u. / lowest freq: 16.52 cm<sup>-1</sup>

|    |           |           |           |
|----|-----------|-----------|-----------|
| C  | 2.788008  | -0.219253 | 0.126599  |
| H  | 2.844972  | -0.473727 | 1.196583  |
| C  | 2.437087  | 1.258816  | -0.129534 |
| H  | 2.854338  | 1.610804  | -1.088408 |
| C  | 0.522069  | -0.052370 | -0.525007 |
| C  | 1.378522  | -2.304078 | -0.439617 |
| C  | 1.740858  | -3.005844 | -1.592135 |
| C  | 0.792633  | -3.002506 | 0.632456  |
| C  | 1.547454  | -4.382109 | -1.682255 |
| H  | 2.152867  | -2.454122 | -2.438666 |
| C  | 0.609253  | -4.382037 | 0.538110  |
| C  | 0.985521  | -5.072988 | -0.612179 |
| H  | 1.829617  | -4.910494 | -2.595226 |
| H  | 0.158191  | -4.905580 | 1.382476  |
| H  | 0.833208  | -6.152703 | -0.671111 |
| C  | 0.188066  | 2.323953  | -0.614209 |
| C  | 0.173752  | 2.803852  | -1.950442 |
| C  | -0.535220 | 3.026113  | 0.381419  |
| C  | -0.513838 | 3.987899  | -2.253283 |
| C  | -1.204288 | 4.212491  | 0.050273  |
| C  | -1.196407 | 4.696900  | -1.261298 |
| S  | 0.247656  | -2.176913 | 2.141430  |
| O  | -0.416339 | -3.240030 | 2.946849  |
| O  | -0.781892 | -1.173436 | 1.706677  |
| O  | 1.453536  | -1.584622 | 2.741451  |
| Cu | -1.164566 | -0.988528 | -0.803533 |
| C  | 4.045827  | -0.672185 | -0.571576 |
| C  | 5.117194  | -1.189538 | 0.178273  |
| C  | 4.169718  | -0.592759 | -1.971784 |
| C  | 6.285319  | -1.618346 | -0.459256 |
| H  | 5.050726  | -1.261915 | 1.256713  |
| C  | 5.338980  | -1.023772 | -2.604569 |
| H  | 3.358200  | -0.208487 | -2.575355 |
| C  | 6.396148  | -1.535793 | -1.849167 |
| H  | 7.105163  | -2.015594 | 0.125118  |
| H  | 5.424320  | -0.962746 | -3.681793 |
| H  | 7.300778  | -1.869440 | -2.340830 |
| C  | 2.889338  | 2.199105  | 0.962100  |
| C  | 3.659385  | 3.331095  | 0.634886  |
| C  | 2.551448  | 1.976428  | 2.310668  |
| C  | 4.076619  | 4.217957  | 1.631681  |
| H  | 3.934809  | 3.533150  | -0.392754 |
| C  | 2.970828  | 2.866131  | 3.303624  |
| H  | 1.958433  | 1.120376  | 2.598571  |

|    |           |           |           |
|----|-----------|-----------|-----------|
| C  | 3.732375  | 3.986074  | 2.964764  |
| H  | 4.666574  | 5.086711  | 1.369594  |
| H  | 2.702692  | 2.687720  | 4.336895  |
| H  | 4.055408  | 4.674374  | 3.735003  |
| N  | 1.574238  | -0.889252 | -0.401566 |
| N  | 0.962059  | 1.189774  | -0.257234 |
| C  | -2.570419 | -2.333541 | -1.315112 |
| C  | -2.479229 | -2.676358 | -2.787359 |
| H  | -2.687035 | -1.800336 | -3.422167 |
| B  | -3.577175 | -1.358929 | -0.782111 |
| O  | -4.259804 | -0.370002 | -1.501793 |
| O  | -3.916414 | -1.246274 | 0.599244  |
| C  | -4.656472 | 0.634786  | -0.556870 |
| C  | -4.910863 | -0.209582 | 0.730209  |
| C  | -3.478151 | 1.582428  | -0.385811 |
| H  | -3.186984 | 1.985904  | -1.365896 |
| H  | -3.707284 | 2.428135  | 0.277992  |
| H  | -2.609364 | 1.038081  | 0.023374  |
| C  | -5.869014 | 1.372225  | -1.080053 |
| H  | -6.260787 | 2.072846  | -0.328070 |
| H  | -5.602056 | 1.956687  | -1.971117 |
| H  | -6.674209 | 0.683269  | -1.363444 |
| C  | -6.279857 | -0.871589 | 0.725765  |
| H  | -7.087108 | -0.142402 | 0.882641  |
| H  | -6.465800 | -1.391680 | -0.224135 |
| H  | -6.338369 | -1.613199 | 1.534377  |
| C  | -4.678370 | 0.535160  | 2.028313  |
| H  | -3.641534 | 0.882697  | 2.116874  |
| H  | -5.341117 | 1.409261  | 2.107855  |
| H  | -4.891060 | -0.113483 | 2.891026  |
| Na | -2.700680 | -2.337055 | 2.224066  |
| H  | -3.200125 | -3.455722 | -3.103180 |
| H  | -2.364673 | -3.199663 | -0.658919 |
| H  | -1.484097 | -3.046889 | -3.089786 |
| C  | -0.646259 | 2.531612  | 1.798061  |
| H  | -0.095944 | 3.217053  | 2.475688  |
| H  | -1.712772 | 2.511089  | 2.104878  |
| H  | -0.253838 | 1.504375  | 1.918563  |
| C  | 0.863150  | 2.091544  | -3.085418 |
| H  | 0.135216  | 1.907151  | -3.903618 |
| H  | 1.687178  | 2.725638  | -3.474508 |
| H  | 1.282774  | 1.110855  | -2.796293 |
| C  | -1.926137 | 5.958414  | -1.618528 |
| H  | -2.422461 | 6.409077  | -0.732799 |
| H  | -1.210149 | 6.698347  | -2.034161 |
| H  | -2.702485 | 5.736621  | -2.380821 |
| H  | -0.520573 | 4.359570  | -3.271903 |
| H  | -1.749306 | 4.749822  | 0.817886  |

92

Figure\_S8\_imid-2\_modeS2\_ed(CuHadd) / electronic energy: -3372.986290612261 a.u. / lowest freq: 19.66 cm<sup>-1</sup>

|    |           |           |           |
|----|-----------|-----------|-----------|
| C  | -1.964089 | -0.024305 | 1.047876  |
| H  | -2.974197 | 0.079767  | 0.627743  |
| C  | -1.237065 | 1.326378  | 1.259380  |
| H  | -0.687894 | 1.322202  | 2.211323  |
| C  | -0.183920 | 0.155005  | -0.498988 |
| C  | -1.234271 | -2.002045 | -0.444511 |
| C  | -0.083322 | -2.799993 | -0.420252 |
| C  | -2.423955 | -2.530762 | -0.971974 |
| C  | -0.110341 | -4.114727 | -0.870681 |
| H  | 0.843329  | -2.363156 | -0.041498 |
| C  | -2.445869 | -3.862163 | -1.397461 |
| C  | -1.305898 | -4.658818 | -1.338460 |
| H  | 0.803854  | -4.712860 | -0.848449 |
| H  | -3.374721 | -4.248302 | -1.821122 |
| H  | -1.346907 | -5.694917 | -1.681041 |
| C  | 0.664662  | 2.364517  | -0.110308 |
| C  | 1.740496  | 2.588724  | 0.788202  |
| C  | 0.571249  | 3.151665  | -1.287109 |
| C  | 2.668253  | 3.606813  | 0.520893  |
| C  | 1.510627  | 4.165100  | -1.523187 |
| C  | 2.556057  | 4.397831  | -0.624749 |
| S  | -3.882666 | -1.526544 | -1.334555 |
| O  | -4.575005 | -2.264209 | -2.415711 |
| O  | -3.303236 | -0.230485 | -1.816128 |
| O  | -4.654003 | -1.391328 | -0.085218 |
| Cu | 0.875720  | -0.363520 | -2.095357 |
| C  | -2.030424 | -0.851567 | 2.308152  |
| C  | -3.268315 | -1.117931 | 2.918658  |
| C  | -0.856999 | -1.360981 | 2.895096  |
| C  | -3.330883 | -1.890429 | 4.082490  |
| H  | -4.184875 | -0.722182 | 2.501149  |
| C  | -0.923833 | -2.133648 | 4.057296  |
| H  | 0.107408  | -1.160867 | 2.450202  |
| C  | -2.160267 | -2.399945 | 4.649876  |
| H  | -4.287846 | -2.092251 | 4.546085  |
| H  | -0.016383 | -2.525111 | 4.498675  |
| H  | -2.211098 | -2.997877 | 5.550581  |
| C  | -2.149701 | 2.527967  | 1.242040  |

|    |           |           |           |
|----|-----------|-----------|-----------|
| C  | -2.151611 | 3.424682  | 2.326826  |
| C  | -2.991563 | 2.788154  | 0.145195  |
| C  | -2.976033 | 4.553688  | 2.311688  |
| H  | -1.511863 | 3.255496  | 3.184038  |
| C  | -3.813330 | 3.918510  | 0.133805  |
| H  | -3.017617 | 2.117105  | -0.699512 |
| C  | -3.805554 | 4.800971  | 1.215867  |
| H  | -2.969895 | 5.238576  | 3.149752  |
| H  | -4.457058 | 4.109860  | -0.714964 |
| H  | -4.442435 | 5.675995  | 1.205425  |
| N  | -1.104712 | -0.670770 | 0.023669  |
| N  | -0.281323 | 1.333918  | 0.132503  |
| C  | 2.875814  | 0.098915  | -1.914189 |
| C  | 2.582003  | -0.510849 | -3.142725 |
| H  | 2.778111  | -1.578530 | -3.294563 |
| B  | 3.473981  | -0.650358 | -0.710823 |
| O  | 3.544073  | -2.022693 | -0.607163 |
| O  | 4.072027  | -0.010877 | 0.348842  |
| C  | 4.114189  | -2.336163 | 0.689739  |
| C  | 4.842631  | -1.001925 | 1.069314  |
| C  | 2.965416  | -2.654976 | 1.630034  |
| H  | 2.386377  | -3.503173 | 1.241005  |
| H  | 3.322658  | -2.929387 | 2.631823  |
| H  | 2.289335  | -1.795161 | 1.732707  |
| C  | 5.025224  | -3.535534 | 0.544612  |
| H  | 5.549282  | -3.745574 | 1.488103  |
| H  | 4.437444  | -4.426436 | 0.285372  |
| H  | 5.775374  | -3.391619 | -0.241777 |
| C  | 6.261897  | -0.930288 | 0.526987  |
| H  | 6.936410  | -1.620012 | 1.052516  |
| H  | 6.296615  | -1.167078 | -0.545682 |
| H  | 6.651260  | 0.088209  | 0.657007  |
| C  | 4.826540  | -0.669064 | 2.544939  |
| H  | 3.807909  | -0.589771 | 2.942505  |
| H  | 5.361879  | -1.435207 | 3.123867  |
| H  | 5.329830  | 0.291456  | 2.718788  |
| Na | -2.252639 | -0.360418 | -3.796482 |
| H  | 2.490331  | 0.073630  | -4.063511 |
| H  | 2.932706  | 1.195825  | -1.899125 |
| H  | -0.110067 | -0.895367 | -3.239915 |
| C  | -0.504173 | 2.947535  | -2.321483 |
| H  | -0.035518 | 2.759194  | -3.310511 |
| H  | -1.163784 | 2.089851  | -2.099981 |
| H  | -1.132287 | 3.860677  | -2.388373 |
| C  | 3.564872  | 5.478492  | -0.882694 |
| H  | 3.549824  | 6.209615  | -0.047128 |
| H  | 4.578933  | 5.032004  | -0.955794 |
| H  | 3.351050  | 6.021204  | -1.828034 |
| C  | 1.944460  | 1.744906  | 2.017502  |
| H  | 3.000702  | 1.783284  | 2.357445  |
| H  | 1.313300  | 2.128310  | 2.844519  |
| H  | 1.702861  | 0.682672  | 1.809450  |
| H  | 1.429061  | 4.769861  | -2.419170 |
| H  | 3.488064  | 3.785461  | 1.207400  |

92

Figure\_S8\_imid-2\_modeS2\_ts(CuHadd) / electronic energy: -3372.965950138900 a.u. / lowest freq: -777.97 cm-1

|    |           |           |           |
|----|-----------|-----------|-----------|
| C  | -1.874727 | -0.496039 | 1.027594  |
| H  | -2.839667 | -0.762274 | 0.570883  |
| C  | -1.664456 | 1.027889  | 1.159816  |
| H  | -1.090829 | 1.270673  | 2.070311  |
| C  | -0.264782 | 0.216162  | -0.548532 |
| C  | -0.444119 | -2.166552 | -0.315829 |
| C  | 0.905653  | -2.520854 | -0.203021 |
| C  | -1.351695 | -3.090720 | -0.855453 |
| C  | 1.345270  | -3.790797 | -0.559166 |
| H  | 1.612822  | -1.773834 | 0.164286  |
| C  | -0.906541 | -4.375399 | -1.183081 |
| C  | 0.428226  | -4.735067 | -1.021163 |
| H  | 2.405924  | -4.037987 | -0.469512 |
| H  | -1.623824 | -5.076652 | -1.613566 |
| H  | 0.755889  | -5.742683 | -1.286075 |
| C  | -0.288053 | 2.598829  | -0.291359 |
| C  | 0.729094  | 3.141338  | 0.536051  |
| C  | -0.790756 | 3.369911  | -1.367517 |
| C  | 1.156543  | 4.461131  | 0.332487  |
| C  | -0.340253 | 4.684801  | -1.550947 |
| C  | 0.622339  | 5.237627  | -0.699532 |
| S  | -3.023409 | -2.640669 | -1.358625 |
| O  | -3.291446 | -3.538970 | -2.519298 |
| O  | -2.897446 | -1.225093 | -1.827248 |
| O  | -3.917917 | -2.824330 | -0.205089 |
| Cu | 1.089440  | -0.047220 | -1.861127 |
| C  | -1.717221 | -1.228658 | 2.336395  |
| C  | -2.820152 | -1.873982 | 2.922172  |
| C  | -0.469527 | -1.284044 | 2.986264  |
| C  | -2.675705 | -2.564804 | 4.129202  |
| H  | -3.793225 | -1.839803 | 2.448931  |
| C  | -0.329379 | -1.977192 | 4.191385  |

|    |           |           |           |
|----|-----------|-----------|-----------|
| H  | 0.395354  | -0.798478 | 2.555833  |
| C  | -1.431512 | -2.617561 | 4.762521  |
| H  | -3.529436 | -3.059467 | 4.574028  |
| H  | 0.634724  | -2.018750 | 4.681611  |
| H  | -1.321754 | -3.153985 | 5.696108  |
| C  | -2.945741 | 1.824529  | 1.173472  |
| C  | -3.218382 | 2.698381  | 2.242319  |
| C  | -3.876436 | 1.726444  | 0.122485  |
| C  | -4.393624 | 3.455421  | 2.256717  |
| H  | -2.520907 | 2.799124  | 3.064573  |
| C  | -5.049443 | 2.485985  | 0.140557  |
| H  | -3.697356 | 1.064203  | -0.711620 |
| C  | -5.308052 | 3.349953  | 1.206567  |
| H  | -4.594459 | 4.125830  | 3.082357  |
| H  | -5.758205 | 2.404677  | -0.673345 |
| H  | -6.216838 | 3.937611  | 1.218923  |
| N  | -0.802430 | -0.853127 | 0.073339  |
| N  | -0.834262 | 1.317294  | -0.027719 |
| C  | 3.061629  | 0.467350  | -2.119114 |
| C  | 2.592460  | -0.443005 | -3.143581 |
| H  | 2.916587  | -1.489538 | -3.072195 |
| B  | 3.775504  | 0.070173  | -0.847037 |
| O  | 4.021525  | -1.236791 | -0.423606 |
| O  | 4.338140  | 0.991404  | 0.029981  |
| C  | 4.644194  | -1.171510 | 0.877285  |
| C  | 5.241427  | 0.277233  | 0.890486  |
| C  | 3.562428  | -1.357292 | 1.930233  |
| H  | 3.068998  | -2.329707 | 1.796396  |
| H  | 3.973671  | -1.336030 | 2.948973  |
| H  | 2.796825  | -0.571892 | 1.856066  |
| C  | 5.672980  | -2.277697 | 0.984563  |
| H  | 6.236218  | -2.202386 | 1.926253  |
| H  | 5.179443  | -3.259367 | 0.970946  |
| H  | 6.387407  | -2.252200 | 0.153063  |
| C  | 6.621485  | 0.342103  | 0.251088  |
| H  | 7.389581  | -0.136559 | 0.874401  |
| H  | 6.627035  | -0.143304 | -0.735052 |
| H  | 6.907701  | 1.392935  | 0.107929  |
| C  | 5.262477  | 0.940766  | 2.251271  |
| H  | 4.258074  | 1.025708  | 2.682368  |
| H  | 5.893530  | 0.378734  | 2.955184  |
| H  | 5.677141  | 1.954719  | 2.169306  |
| Na | -2.297371 | -1.724337 | -4.008546 |
| H  | 2.588591  | -0.096340 | -4.182504 |
| H  | 3.067907  | 1.532450  | -2.385066 |
| H  | 1.033491  | -0.823576 | -3.273165 |
| C  | -1.800442 | 2.829376  | -2.344662 |
| H  | -1.423906 | 2.964415  | -3.380627 |
| H  | -1.994237 | 1.748640  | -2.205772 |
| H  | -2.756971 | 3.382245  | -2.235011 |
| C  | 1.101742  | 6.646376  | -0.893336 |
| H  | 0.896557  | 7.239105  | 0.022917  |
| H  | 2.195094  | 6.645053  | -1.087134 |
| H  | 0.593463  | 7.137532  | -1.750277 |
| C  | 1.402092  | 2.347539  | 1.623704  |
| H  | 2.502167  | 2.479371  | 1.557273  |
| H  | 1.057948  | 2.707686  | 2.615524  |
| H  | 1.203389  | 1.263157  | 1.539631  |
| H  | -0.740533 | 5.277194  | -2.365751 |
| H  | 1.920717  | 4.883932  | 0.975169  |

92

Figure\_S8\_imid-2\_modeS2\_prod(CuHadd) / electronic energy: -3373.009403035306 a.u. / lowest freq: 14.98 cm<sup>-1</sup>

|    |           |           |           |
|----|-----------|-----------|-----------|
| C  | -2.148344 | 0.464675  | 0.911052  |
| H  | -3.062182 | 0.512323  | 0.304467  |
| C  | -1.321974 | 1.778343  | 0.888673  |
| H  | -1.017589 | 2.068662  | 1.905472  |
| C  | -0.081886 | 0.072265  | -0.179025 |
| C  | -1.381298 | -1.905436 | 0.173455  |
| C  | -0.329533 | -2.703729 | 0.651392  |
| C  | -2.491785 | -2.531598 | -0.417365 |
| C  | -0.379368 | -4.090128 | 0.565462  |
| H  | 0.533322  | -2.207646 | 1.102950  |
| C  | -2.538759 | -3.928090 | -0.484349 |
| C  | -1.496221 | -4.707965 | 0.005284  |
| H  | 0.457101  | -4.682986 | 0.942207  |
| H  | -3.405524 | -4.389130 | -0.960709 |
| H  | -1.552704 | -5.796321 | -0.061115 |
| C  | 0.968069  | 2.230137  | -0.161679 |
| C  | 1.800218  | 2.681944  | 0.895303  |
| C  | 1.252675  | 2.640313  | -1.490277 |
| C  | 2.847708  | 3.573392  | 0.622370  |
| C  | 2.317096  | 3.520281  | -1.732732 |
| C  | 3.111250  | 3.992933  | -0.683470 |
| S  | -3.844253 | -1.630820 | -1.182693 |
| O  | -4.473919 | -2.602240 | -2.127105 |
| O  | -3.201016 | -0.521814 | -1.953238 |
| O  | -4.729456 | -1.182880 | -0.094342 |
| Cu | 1.235456  | -0.978895 | -1.119900 |

|    |           |           |           |
|----|-----------|-----------|-----------|
| C  | -2.508049 | 0.038557  | 2.313764  |
| C  | -3.839995 | 0.118854  | 2.756424  |
| C  | -1.518607 | -0.415897 | 3.206858  |
| C  | -4.177032 | -0.263321 | 4.058363  |
| H  | -4.617300 | 0.486607  | 2.098847  |
| C  | -1.860543 | -0.797622 | 4.506976  |
| H  | -0.484561 | -0.481333 | 2.895770  |
| C  | -3.188835 | -0.722928 | 4.932161  |
| H  | -5.204889 | -0.199207 | 4.391262  |
| H  | -1.094706 | -1.150552 | 5.185475  |
| H  | -3.451836 | -1.017535 | 5.939848  |
| C  | -2.044372 | 2.945840  | 0.260832  |
| C  | -2.192199 | 4.149697  | 0.974638  |
| C  | -2.555561 | 2.865381  | -1.047367 |
| C  | -2.837547 | 5.244424  | 0.391654  |
| H  | -1.803688 | 4.246032  | 1.980861  |
| C  | -3.199297 | 3.962219  | -1.626611 |
| H  | -2.458433 | 1.955419  | -1.619536 |
| C  | -3.340234 | 5.151071  | -0.907935 |
| H  | -2.945539 | 6.166888  | 0.947394  |
| H  | -3.588479 | 3.890124  | -2.633964 |
| H  | -3.838389 | 5.999942  | -1.358112 |
| N  | -1.214285 | -0.499449 | 0.273861  |
| N  | -0.136800 | 1.379564  | 0.103149  |
| C  | 2.493695  | -2.117080 | -2.152087 |
| C  | 1.965175  | -3.519585 | -2.378203 |
| H  | 1.823174  | -4.054063 | -1.425173 |
| B  | 3.462014  | -1.838224 | -1.024878 |
| O  | 3.632031  | -2.644970 | 0.112767  |
| O  | 4.241284  | -0.674793 | -0.907559 |
| C  | 4.247273  | -1.827319 | 1.121217  |
| C  | 5.059373  | -0.803158 | 0.264294  |
| C  | 3.125257  | -1.156249 | 1.903536  |
| H  | 2.473953  | -1.924529 | 2.344369  |
| H  | 3.495133  | -0.523042 | 2.722241  |
| H  | 2.508084  | -0.536820 | 1.231183  |
| C  | 5.083369  | -2.697894 | 2.034677  |
| H  | 5.633644  | -2.089796 | 2.767813  |
| H  | 4.438705  | -3.389691 | 2.594378  |
| H  | 5.808807  | -3.300063 | 1.473447  |
| C  | 6.409953  | -1.355539 | -0.167465 |
| H  | 7.121110  | -1.410620 | 0.669051  |
| H  | 6.308735  | -2.360609 | -0.600542 |
| H  | 6.843251  | -0.700759 | -0.935822 |
| C  | 5.223568  | 0.561861  | 0.899533  |
| H  | 4.252444  | 1.034852  | 1.083599  |
| H  | 5.763600  | 0.497714  | 1.855698  |
| H  | 5.795109  | 1.225689  | 0.236274  |
| Na | -3.917163 | -1.304567 | -4.071213 |
| H  | 2.645438  | -4.153104 | -2.980016 |
| H  | 2.719766  | -1.571474 | -3.083558 |
| H  | 0.987808  | -3.555551 | -2.892661 |
| C  | 0.453598  | 2.174566  | -2.679749 |
| H  | 1.132516  | 1.696002  | -3.416821 |
| H  | -0.326654 | 1.436118  | -2.421978 |
| H  | -0.039614 | 3.046470  | -3.158753 |
| C  | 4.253392  | 4.930169  | -0.945776 |
| H  | 4.095661  | 5.876073  | -0.386094 |
| H  | 5.203039  | 4.463165  | -0.609188 |
| H  | 4.344678  | 5.172188  | -2.026071 |
| C  | 1.631444  | 2.208345  | 2.314380  |
| H  | 2.622010  | 2.080726  | 2.800609  |
| H  | 1.047959  | 2.956720  | 2.889707  |
| H  | 1.126898  | 1.223898  | 2.360335  |
| H  | 2.526974  | 3.836477  | -2.748204 |
| H  | 3.477866  | 3.927573  | 1.430474  |

92

Figure\_S8\_imid-2\_modeR1\_ed(CuHadd) / electronic energy: -3372.981777696869 a.u. / lowest freq: 19.37 cm<sup>-1</sup>

|   |           |           |           |
|---|-----------|-----------|-----------|
| C | 2.598340  | -0.248897 | 0.514345  |
| H | 2.283950  | -0.578886 | 1.517191  |
| C | 2.319122  | 1.236877  | 0.254280  |
| H | 2.992752  | 1.645313  | -0.518754 |
| C | 0.643140  | -0.055057 | -0.782574 |
| C | 1.611808  | -2.303867 | -0.618873 |
| C | 2.446410  | -2.868998 | -1.587022 |
| C | 0.803808  | -3.150545 | 0.157017  |
| C | 2.507268  | -4.247449 | -1.767416 |
| H | 3.034434  | -2.211222 | -2.228523 |
| C | 0.869628  | -4.532728 | -0.024891 |
| C | 1.725815  | -5.084962 | -0.974590 |
| H | 3.164486  | -4.663942 | -2.533498 |
| H | 0.234562  | -5.166835 | 0.596431  |
| H | 1.773466  | -6.168804 | -1.100302 |
| C | 0.350785  | 2.322360  | -0.894828 |
| C | 0.701281  | 2.742948  | -2.208199 |
| C | -0.578330 | 3.091244  | -0.150828 |
| C | 0.136104  | 3.913501  | -2.735332 |
| C | -1.111698 | 4.265649  | -0.699408 |

|    |           |           |           |
|----|-----------|-----------|-----------|
| C  | -0.763060 | 4.678497  | -1.986714 |
| S  | -0.444564 | -2.502202 | 1.275366  |
| O  | -1.033053 | -3.674676 | 1.957670  |
| O  | -1.427602 | -1.866380 | 0.326929  |
| O  | 0.215588  | -1.526176 | 2.160646  |
| Cu | -0.927424 | -0.656247 | -1.886332 |
| C  | 4.034107  | -0.649914 | 0.274611  |
| C  | 4.771496  | -1.256436 | 1.307592  |
| C  | 4.659068  | -0.428986 | -0.967904 |
| C  | 6.101107  | -1.635635 | 1.100748  |
| H  | 4.319053  | -1.437717 | 2.274617  |
| C  | 5.988259  | -0.810914 | -1.170044 |
| H  | 4.116038  | 0.024500  | -1.786000 |
| C  | 6.708935  | -1.413341 | -0.136760 |
| H  | 6.660526  | -2.102638 | 1.901009  |
| H  | 6.458935  | -0.641885 | -2.129884 |
| H  | 7.738025  | -1.708733 | -0.295230 |
| C  | 2.421045  | 2.108274  | 1.484114  |
| C  | 3.233267  | 3.257817  | 1.458320  |
| C  | 1.725853  | 1.797711  | 2.669198  |
| C  | 3.343326  | 4.075406  | 2.586843  |
| H  | 3.781194  | 3.526561  | 0.563762  |
| C  | 1.840370  | 2.617752  | 3.795305  |
| H  | 1.080512  | 0.933458  | 2.723762  |
| C  | 2.647952  | 3.755601  | 3.754383  |
| H  | 3.968760  | 4.958194  | 2.555600  |
| H  | 1.297319  | 2.373109  | 4.698989  |
| H  | 2.733589  | 4.390398  | 4.626781  |
| N  | 1.642550  | -0.887651 | -0.429692 |
| N  | 0.949542  | 1.173473  | -0.310514 |
| C  | -2.617048 | 0.563616  | -1.834282 |
| C  | -2.596298 | -0.318954 | -2.932163 |
| H  | -2.274035 | 0.010804  | -3.925769 |
| B  | -3.437202 | 0.226644  | -0.583268 |
| O  | -3.724908 | 1.086280  | 0.442115  |
| O  | -4.046005 | -1.012682 | -0.406372 |
| C  | -4.335841 | 0.334855  | 1.515104  |
| C  | -4.889855 | -0.934877 | 0.774621  |
| C  | -3.246024 | 0.011306  | 2.524197  |
| H  | -2.827394 | 0.945218  | 2.921356  |
| H  | -3.642396 | -0.560468 | 3.374517  |
| H  | -2.428334 | -0.558771 | 2.065719  |
| C  | -5.403281 | 1.194675  | 2.159447  |
| H  | -5.943208 | 0.633584  | 2.935772  |
| H  | -4.937341 | 2.064029  | 2.642452  |
| H  | -6.134234 | 1.569066  | 1.432583  |
| C  | -6.315638 | -0.764056 | 0.280670  |
| H  | -7.034359 | -0.732413 | 1.110775  |
| H  | -6.427510 | 0.157400  | -0.306739 |
| H  | -6.587813 | -1.608711 | -0.366578 |
| C  | -4.736966 | -2.222387 | 1.558719  |
| H  | -3.682857 | -2.439192 | 1.779811  |
| H  | -5.282354 | -2.170320 | 2.511756  |
| H  | -5.161566 | -3.068283 | 0.996551  |
| Na | -2.881956 | -3.010393 | -0.932119 |
| H  | -3.268299 | -1.184877 | -2.961404 |
| H  | -2.263223 | 1.589126  | -1.989402 |
| H  | -0.428056 | -1.869767 | -2.796705 |
| C  | 1.667975  | 1.992346  | -3.089001 |
| H  | 1.158589  | 1.702225  | -4.032100 |
| H  | 2.529421  | 2.648405  | -3.334702 |
| H  | 2.066788  | 1.071370  | -2.629937 |
| C  | -1.028230 | 2.693811  | 1.226002  |
| H  | -2.115824 | 2.879542  | 1.340301  |
| H  | -0.853021 | 1.617334  | 1.420967  |
| H  | -0.497649 | 3.310157  | 1.979902  |
| C  | -1.361049 | 5.933690  | -2.551491 |
| H  | -2.466714 | 5.837101  | -2.585776 |
| H  | -1.092213 | 6.797318  | -1.907421 |
| H  | -0.994085 | 6.135245  | -3.580389 |
| H  | 0.404990  | 4.231753  | -3.736204 |
| H  | -1.813534 | 4.858487  | -0.123505 |

Figure\_S8\_imid-2\_modeR1\_ts(CuHadd) / electronic energy: -3372.965984629026 a.u. / lowest freq: -740.12 cm-1

|   |          |           |           |
|---|----------|-----------|-----------|
| C | 2.680006 | -0.301509 | 0.546554  |
| H | 2.321038 | -0.629060 | 1.535486  |
| C | 2.463551 | 1.200759  | 0.298097  |
| H | 3.202087 | 1.607035  | -0.413823 |
| C | 0.784378 | -0.019912 | -0.827144 |
| C | 1.671944 | -2.297667 | -0.691782 |
| C | 2.491158 | -2.841598 | -1.685675 |
| C | 0.837342 | -3.158864 | 0.040622  |
| C | 2.518839 | -4.212744 | -1.924520 |
| H | 3.100831 | -2.171176 | -2.293160 |
| C | 0.870393 | -4.532938 | -0.198159 |
| C | 1.718758 | -5.064306 | -1.166815 |
| H | 3.167405 | -4.612249 | -2.706793 |
| H | 0.215226 | -5.178005 | 0.389643  |



|    |           |           |           |
|----|-----------|-----------|-----------|
| H  | 1.742165  | -6.142726 | -1.337181 |
| C  | 0.569841  | 2.362568  | -0.916285 |
| C  | 1.068868  | 2.886648  | -2.138993 |
| C  | -0.462738 | 3.053412  | -0.239021 |
| C  | 0.572974  | 4.105632  | -2.624148 |
| C  | -0.934413 | 4.272780  | -0.744894 |
| C  | -0.420154 | 4.804070  | -1.930029 |
| S  | -0.402058 | -2.517814 | 1.167810  |
| O  | -1.107584 | -3.705471 | 1.718239  |
| O  | -1.331139 | -1.766739 | 0.250429  |
| O  | 0.278205  | -1.662655 | 2.151064  |
| Cu | -0.866024 | -0.564807 | -1.696285 |
| C  | 4.107780  | -0.751908 | 0.352475  |
| C  | 4.784705  | -1.401267 | 1.400722  |
| C  | 4.783469  | -0.538167 | -0.864267 |
| C  | 6.105188  | -1.828961 | 1.233787  |
| H  | 4.291964  | -1.578959 | 2.348523  |
| C  | 6.103275  | -0.968580 | -1.026616 |
| H  | 4.287170  | -0.050778 | -1.692502 |
| C  | 6.763833  | -1.613160 | 0.021360  |
| H  | 6.617944  | -2.328791 | 2.045404  |
| H  | 6.613342  | -0.804207 | -1.966934 |
| H  | 7.785700  | -1.946168 | -0.106272 |
| C  | 2.498791  | 2.037271  | 1.554277  |
| C  | 3.375996  | 3.134462  | 1.640957  |
| C  | 1.664661  | 1.747863  | 2.651067  |
| C  | 3.414580  | 3.922374  | 2.795142  |
| H  | 4.029929  | 3.384939  | 0.814916  |
| C  | 1.706791  | 2.538636  | 3.802702  |
| H  | 0.972510  | 0.918697  | 2.615517  |
| C  | 2.580712  | 3.625010  | 3.874928  |
| H  | 4.091411  | 4.765082  | 2.851722  |
| H  | 1.058147  | 2.310453  | 4.638525  |
| H  | 2.611083  | 4.236956  | 4.767108  |
| N  | 1.740278  | -0.894243 | -0.440519 |
| N  | 1.130901  | 1.191268  | -0.344171 |
| C  | -2.764855 | 0.290479  | -1.947550 |
| C  | -2.478401 | -0.770270 | -2.893244 |
| H  | -2.348307 | -0.506031 | -3.948953 |
| B  | -3.627403 | 0.102707  | -0.728759 |
| O  | -4.070596 | 1.129045  | 0.096232  |
| O  | -4.195042 | -1.126314 | -0.305886 |
| C  | -4.742138 | 0.545810  | 1.224396  |
| C  | -5.250944 | -0.802807 | 0.630619  |
| C  | -3.718192 | 0.336668  | 2.332084  |
| H  | -3.286702 | 1.302910  | 2.622517  |
| H  | -4.172471 | -0.099381 | 3.232748  |
| H  | -2.894644 | -0.313292 | 2.000972  |
| C  | -5.841070 | 1.479694  | 1.683523  |
| H  | -6.439669 | 1.020974  | 2.484003  |
| H  | -5.406845 | 2.406565  | 2.082124  |
| H  | -6.514278 | 1.752995  | 0.861898  |
| C  | -6.535426 | -0.644642 | -0.167746 |
| H  | -7.401151 | -0.452066 | 0.480902  |
| H  | -6.455660 | 0.179647  | -0.889916 |
| H  | -6.736073 | -1.566110 | -0.731482 |
| C  | -5.392772 | -1.920431 | 1.642276  |
| H  | -4.447760 | -2.140762 | 2.158188  |
| H  | -6.127404 | -1.653454 | 2.415472  |
| H  | -5.760050 | -2.841065 | 1.163468  |
| Na | -3.089928 | -3.152122 | -0.010650 |
| H  | -3.057258 | -1.698918 | -2.799178 |
| H  | -2.534254 | 1.315418  | -2.264164 |
| H  | -1.019820 | -1.574362 | -2.926795 |
| C  | 2.117634  | 2.187148  | -2.965095 |
| H  | 1.752172  | 2.070954  | -4.007345 |
| H  | 3.046448  | 2.795170  | -2.976539 |
| H  | 2.364277  | 1.175865  | -2.594172 |
| C  | -1.084024 | 2.526434  | 1.023023  |
| H  | -2.182373 | 2.665713  | 0.980792  |
| H  | -0.890229 | 1.443675  | 1.165835  |
| H  | -0.698112 | 3.096489  | 1.892828  |
| C  | -0.947503 | 6.109678  | -2.448972 |
| H  | -2.038180 | 6.022556  | -2.638184 |
| H  | -0.772454 | 6.907650  | -1.696945 |
| H  | -0.448969 | 6.404958  | -3.396711 |
| H  | 0.963197  | 4.509264  | -3.551527 |
| H  | -1.713544 | 4.809752  | -0.215474 |

92

Figure\_S8\_imid-2\_modeR1\_prod(CuHadd) / electronic energy: -3373.017513844781 a.u. / lowest freq: 20.32 cm<sup>-1</sup>

|   |          |           |           |
|---|----------|-----------|-----------|
| C | 2.766629 | -0.155573 | 0.144805  |
| H | 2.759980 | -0.450376 | 1.205790  |
| C | 2.397868 | 1.320823  | -0.077800 |
| H | 2.852273 | 1.713099  | -1.003760 |
| C | 0.538726 | -0.015193 | -0.631547 |
| C | 1.476619 | -2.254180 | -0.559041 |
| C | 1.970389 | -2.916516 | -1.686717 |
| C | 0.887941 | -3.009452 | 0.472186  |

|    |           |           |           |
|----|-----------|-----------|-----------|
| C  | 1.923795  | -4.304875 | -1.780689 |
| H  | 2.382505  | -2.325244 | -2.505989 |
| C  | 0.847593  | -4.400337 | 0.372338  |
| C  | 1.373455  | -5.050267 | -0.741448 |
| H  | 2.317713  | -4.800270 | -2.670518 |
| H  | 0.386138  | -4.964462 | 1.184137  |
| H  | 1.338051  | -6.139979 | -0.801454 |
| C  | 0.153792  | 2.357206  | -0.628268 |
| C  | 0.184613  | 2.887955  | -1.944995 |
| C  | -0.614412 | 3.013054  | 0.365242  |
| C  | -0.512164 | 4.071123  | -2.231114 |
| C  | -1.289566 | 4.200522  | 0.052107  |
| C  | -1.243517 | 4.732166  | -1.238786 |
| S  | 0.189244  | -2.252666 | 1.949733  |
| O  | -0.475695 | -3.365840 | 2.685986  |
| O  | -0.857875 | -1.289022 | 1.471895  |
| O  | 1.318294  | -1.619358 | 2.650585  |
| Cu | -1.128671 | -0.916926 | -1.067370 |
| C  | 4.078224  | -0.552765 | -0.485381 |
| C  | 5.109374  | -1.078291 | 0.313564  |
| C  | 4.292508  | -0.413275 | -1.869914 |
| C  | 6.326722  | -1.456486 | -0.260608 |
| H  | 4.973334  | -1.196415 | 1.381390  |
| C  | 5.510868  | -0.793809 | -2.439344 |
| H  | 3.513299  | -0.022345 | -2.510973 |
| C  | 6.527350  | -1.314595 | -1.635565 |
| H  | 7.115028  | -1.860563 | 0.361290  |
| H  | 5.665859  | -0.687133 | -3.505166 |
| H  | 7.470041  | -1.609200 | -2.078214 |
| C  | 2.777998  | 2.233288  | 1.064298  |
| C  | 3.527128  | 3.397294  | 0.808063  |
| C  | 2.395855  | 1.952382  | 2.390159  |
| C  | 3.880650  | 4.258077  | 1.851271  |
| H  | 3.835573  | 3.644492  | -0.200134 |
| C  | 2.751916  | 2.816097  | 3.429723  |
| H  | 1.814668  | 1.072332  | 2.624649  |
| C  | 3.493270  | 3.968022  | 3.160859  |
| H  | 4.454849  | 5.151696  | 1.643432  |
| H  | 2.449474  | 2.593056  | 4.444700  |
| H  | 3.766894  | 4.636222  | 3.967098  |
| N  | 1.604035  | -0.833085 | -0.483683 |
| N  | 0.933614  | 1.223743  | -0.282548 |
| C  | -2.569912 | -2.202053 | -1.610153 |
| C  | -2.230583 | -3.580147 | -1.077109 |
| H  | -3.050759 | -4.319112 | -1.174878 |
| B  | -3.590966 | -1.316965 | -0.955668 |
| O  | -4.294268 | -0.288383 | -1.592216 |
| O  | -3.932272 | -1.334103 | 0.424379  |
| C  | -4.715749 | 0.627181  | -0.572901 |
| C  | -4.941620 | -0.322567 | 0.645572  |
| C  | -3.562232 | 1.589911  | -0.338240 |
| H  | -3.309372 | 2.093171  | -1.282052 |
| H  | -3.797083 | 2.361977  | 0.407763  |
| H  | -2.667585 | 1.033484  | -0.009007 |
| C  | -5.951782 | 1.368190  | -1.032738 |
| H  | -6.357725 | 1.997526  | -0.227135 |
| H  | -5.705948 | 2.026440  | -1.877021 |
| H  | -6.739639 | 0.681108  | -1.365087 |
| C  | -6.299744 | -1.004145 | 0.604641  |
| H  | -7.115123 | -0.303058 | 0.831753  |
| H  | -6.491756 | -1.447917 | -0.381993 |
| H  | -6.335871 | -1.810461 | 1.350294  |
| C  | -4.704947 | 0.326618  | 1.994245  |
| H  | -3.659898 | 0.640773  | 2.114784  |
| H  | -5.345333 | 1.211277  | 2.123068  |
| H  | -4.949470 | -0.366443 | 2.813530  |
| Na | -2.752145 | -2.405688 | 2.135025  |
| H  | -1.955227 | -3.574044 | -0.006815 |
| H  | -2.625957 | -2.172377 | -2.710261 |
| H  | -1.356769 | -4.029317 | -1.577960 |
| C  | 0.937170  | 2.234829  | -3.075830 |
| H  | 0.245727  | 2.056662  | -3.926360 |
| H  | 1.754425  | 2.906467  | -3.412927 |
| H  | 1.378892  | 1.258859  | -2.803895 |
| C  | -0.763190 | 2.468609  | 1.760298  |
| H  | -1.836082 | 2.441499  | 2.042514  |
| H  | -0.377751 | 1.435125  | 1.851698  |
| H  | -0.229447 | 3.128186  | 2.475522  |
| C  | -1.990657 | 5.996231  | -1.547643 |
| H  | -3.073138 | 5.846679  | -1.350213 |
| H  | -1.614465 | 6.818547  | -0.903284 |
| H  | -1.865464 | 6.296768  | -2.609666 |
| H  | -0.483350 | 4.477407  | -3.235731 |
| H  | -1.870809 | 4.705475  | 0.815519  |

92

Figure\_S8\_imid-2\_modeR2\_ed(CuHadd) / electronic energy: -3372.981529315850 a.u. / lowest freq: 17.41 cm-1

|   |           |          |           |
|---|-----------|----------|-----------|
| C | -2.379724 | 0.610235 | 0.707918  |
| H | -3.099310 | 0.714161 | -0.118463 |

|    |           |           |           |
|----|-----------|-----------|-----------|
| C  | -1.351460 | 1.756697  | 0.767448  |
| H  | -1.103791 | 1.990695  | 1.813097  |
| C  | -0.271806 | -0.193333 | -0.014863 |
| C  | -1.936584 | -1.895927 | 0.356158  |
| C  | -1.318713 | -2.794973 | 1.234386  |
| C  | -2.916673 | -2.367607 | -0.533047 |
| C  | -1.661804 | -4.142549 | 1.241764  |
| H  | -0.562035 | -2.404061 | 1.918299  |
| C  | -3.264089 | -3.722047 | -0.508257 |
| C  | -2.647418 | -4.606666 | 0.370688  |
| H  | -1.165752 | -4.826376 | 1.934023  |
| H  | -4.012380 | -4.075539 | -1.220210 |
| H  | -2.931428 | -5.661105 | 0.369303  |
| C  | 1.032189  | 1.837810  | -0.155961 |
| C  | 1.809988  | 2.360469  | 0.910082  |
| C  | 1.455095  | 2.059071  | -1.492510 |
| C  | 2.946005  | 3.133947  | 0.627920  |
| C  | 2.605368  | 2.821312  | -1.741378 |
| C  | 3.345336  | 3.368876  | -0.689407 |
| S  | -3.730667 | -1.343231 | -1.775776 |
| O  | -4.020490 | -2.291781 | -2.885661 |
| O  | -2.708243 | -0.338558 | -2.196383 |
| O  | -4.914172 | -0.757826 | -1.123546 |
| Cu | 0.746626  | -1.624479 | -0.947193 |
| C  | -3.120668 | 0.414940  | 2.007238  |
| C  | -4.510893 | 0.614760  | 2.065219  |
| C  | -2.436889 | 0.026174  | 3.175306  |
| C  | -5.202713 | 0.425370  | 3.265349  |
| H  | -5.060435 | 0.920746  | 1.184198  |
| C  | -3.133081 | -0.162521 | 4.372332  |
| H  | -1.366127 | -0.134654 | 3.157084  |
| C  | -4.514923 | 0.036312  | 4.417401  |
| H  | -6.273146 | 0.581019  | 3.302218  |
| H  | -2.600826 | -0.463673 | 5.265309  |
| H  | -5.052648 | -0.110130 | 5.345199  |
| C  | -1.801810 | 3.026384  | 0.087184  |
| C  | -1.865892 | 4.228905  | 0.815562  |
| C  | -2.140845 | 3.041243  | -1.277904 |
| C  | -2.261045 | 5.415654  | 0.191051  |
| H  | -1.607171 | 4.251817  | 1.866856  |
| C  | -2.534254 | 4.229921  | -1.898668 |
| H  | -2.101607 | 2.136645  | -1.863667 |
| C  | -2.594493 | 5.416418  | -1.165014 |
| H  | -2.306858 | 6.335886  | 0.758960  |
| H  | -2.792070 | 4.230762  | -2.949835 |
| H  | -2.899194 | 6.336220  | -1.647205 |
| N  | -1.504174 | -0.544070 | 0.405829  |
| N  | -0.178272 | 1.141833  | 0.105158  |
| C  | 2.063307  | -2.826732 | 0.135147  |
| C  | 1.799011  | -3.317493 | -1.152327 |
| H  | 1.085569  | -4.132944 | -1.319057 |
| B  | 3.351019  | -2.030355 | 0.403039  |
| O  | 4.036571  | -2.034074 | 1.593916  |
| O  | 3.998389  | -1.309631 | -0.577349 |
| C  | 5.155118  | -1.121200 | 1.458901  |
| C  | 5.338204  | -1.042979 | -0.095855 |
| C  | 4.713749  | 0.199307  | 2.060243  |
| H  | 4.407407  | 0.048620  | 3.103590  |
| H  | 5.510881  | 0.954556  | 2.042857  |
| H  | 3.852172  | 0.592068  | 1.508845  |
| C  | 6.342808  | -1.682348 | 2.208136  |
| H  | 7.232334  | -1.054324 | 2.055551  |
| H  | 6.134290  | -1.705696 | 3.286146  |
| H  | 6.583789  | -2.704396 | 1.892411  |
| C  | 6.231405  | -2.146687 | -0.638625 |
| H  | 7.283321  | -1.995490 | -0.360142 |
| H  | 5.918408  | -3.135040 | -0.273351 |
| H  | 6.170923  | -2.160079 | -1.735009 |
| C  | 5.785282  | 0.306668  | -0.610384 |
| H  | 5.071141  | 1.095097  | -0.350155 |
| H  | 6.766577  | 0.580135  | -0.197199 |
| H  | 5.876671  | 0.285549  | -1.704335 |
| Na | -1.581948 | -1.494396 | -3.805259 |
| H  | 2.519202  | -3.163630 | -1.962681 |
| H  | 1.513150  | -3.267292 | 0.974708  |
| H  | 0.242591  | -1.686744 | -2.466054 |
| C  | 1.486322  | 2.075859  | 2.353089  |
| H  | 2.405765  | 2.091287  | 2.976186  |
| H  | 0.798911  | 2.854542  | 2.742548  |
| H  | 1.034427  | 1.068399  | 2.468582  |
| C  | 0.708431  | 1.524011  | -2.685657 |
| H  | 1.388702  | 0.891920  | -3.294280 |
| H  | -0.166474 | 0.908056  | -2.412314 |
| H  | 0.351389  | 2.370580  | -3.309225 |
| C  | 4.573717  | 4.188025  | -0.958128 |
| H  | 4.441361  | 5.206920  | -0.537264 |
| H  | 5.453889  | 3.709632  | -0.479049 |
| H  | 4.773968  | 4.280520  | -2.046780 |

H 2.920393 2.993231 -2.764299  
H 3.536204 3.542596 1.440340  
92

Figure\_S8\_imid-2\_modeR2\_ts(CuHadd) / electronic energy: -3372.965179483431 a.u. / lowest freq: -710.22 cm<sup>-1</sup>

C -2.121997 0.474637 0.943029  
H -3.009185 0.609050 0.308689  
C -1.202632 1.720816 0.982211  
H -0.868935 1.922899 2.010772  
C -0.097489 -0.015381 -0.190091  
C -1.532933 -1.915385 0.169619  
C -0.625993 -2.814528 0.749616  
C -2.649781 -2.422693 -0.515385  
C -0.830325 -4.187215 0.677996  
H 0.252092 -2.408742 1.257739  
C -2.852962 -3.805309 -0.572569  
C -1.955817 -4.686087 0.023081  
H -0.109370 -4.865843 1.138964  
H -3.721929 -4.177238 -1.117975  
H -2.131482 -5.762469 -0.033179  
C 1.070174 2.097194 -0.127784  
C 1.928795 2.520491 0.921505  
C 1.345453 2.517923 -1.456142  
C 3.001809 3.378255 0.639356  
C 2.439941 3.357707 -1.707569  
C 3.266003 3.792236 -0.667355  
S -3.834291 -1.381607 -1.375991  
O -4.434503 -2.265345 -2.421034  
O -3.026307 -0.306632 -2.028434  
O -4.789010 -0.900734 -0.363247  
Cu 0.941272 -1.053891 -1.418483  
C -2.555716 0.031024 2.319090  
C -3.907517 0.112849 2.696556  
C -1.616504 -0.459838 3.246374  
C -4.312228 -0.299256 3.969778  
H -4.648763 0.501870 2.010318  
C -2.026097 -0.871271 4.517551  
H -0.568962 -0.528890 2.982917  
C -3.373029 -0.792396 4.878718  
H -5.354888 -0.233970 4.252675  
H -1.298529 -1.251306 5.222963  
H -3.688676 -1.110833 5.863781  
C -1.850031 2.975713 0.446242  
C -1.911012 4.133065 1.245005  
C -2.377180 3.022871 -0.857274  
C -2.485932 5.307039 0.749115  
H -1.509475 4.131624 2.250712  
C -2.950106 4.198692 -1.349388  
H -2.347937 2.151786 -1.493159  
C -3.004402 5.340179 -0.547121  
H -2.527212 6.192630 1.369980  
H -3.351968 4.224473 -2.354014  
H -3.447988 6.250223 -0.929807  
N -1.244001 -0.532005 0.302491  
N -0.063373 1.286579 0.148710  
C 2.169241 -2.716872 -1.565490  
C 1.883095 -2.124487 -2.847033  
H 1.331441 -2.713228 -3.586666  
B 3.224726 -2.208046 -0.617502  
O 3.594121 -2.841013 0.567099  
O 3.971801 -1.043793 -0.819520  
C 4.398752 -1.905432 1.309553  
C 5.016561 -1.028702 0.171284  
C 3.447541 -1.114504 2.192488  
H 2.892660 -1.803606 2.843799  
H 3.967564 -0.388272 2.832297  
H 2.715509 -0.579182 1.570688  
C 5.408394 -2.662063 2.144011  
H 6.092786 -1.970207 2.656635  
H 4.896969 -3.255408 2.914377  
H 6.007544 -3.350376 1.535079  
C 6.248381 -1.670045 -0.449248  
H 7.115755 -1.635077 0.224825  
H 6.060258 -2.720202 -0.713340  
H 6.514782 -1.133788 -1.370183  
C 5.304169 0.403025 0.567085  
H 4.397048 0.914605 0.906541  
H 6.046376 0.447805 1.377274  
H 5.706008 0.964530 -0.287501  
Na -3.331753 -1.070699 -4.210404  
H 2.664257 -1.513944 -3.316218  
H 1.574548 -3.593148 -1.279442  
H 0.729179 -0.900037 -2.995941  
C 1.756175 2.061976 2.345123  
H 2.745625 1.921694 2.829986  
H 1.189970 2.827059 2.915854  
H 1.232666 1.087470 2.402155  
C 0.496411 2.122505 -2.635473  
H 1.131714 1.626642 -3.399288

|   |           |          |           |
|---|-----------|----------|-----------|
| H | -0.318299 | 1.425283 | -2.374136 |
| H | 0.040824  | 3.030477 | -3.083801 |
| C | 4.438631  | 4.688153 | -0.939314 |
| H | 4.322669  | 5.636432 | -0.373427 |
| H | 5.374283  | 4.184704 | -0.616284 |
| H | 4.525983  | 4.931918 | -2.019515 |
| H | 2.644332  | 3.678144 | -2.722869 |
| H | 3.651942  | 3.709692 | 1.441320  |

92

Figure\_S8\_imid-2\_modeR2\_prod(CuHadd) / electronic energy: -3373.009128484981 a.u. / lowest freq: 15.59 cm-1

|    |           |           |           |
|----|-----------|-----------|-----------|
| C  | -2.292701 | 0.540112  | 0.777097  |
| H  | -3.096353 | 0.594495  | 0.029109  |
| C  | -1.382718 | 1.794845  | 0.797330  |
| H  | -1.164912 | 2.103000  | 1.830762  |
| C  | -0.139792 | -0.042489 | -0.015951 |
| C  | -1.600469 | -1.914104 | 0.327915  |
| C  | -0.706037 | -2.746352 | 1.017123  |
| C  | -2.664851 | -2.497231 | -0.380619 |
| C  | -0.878623 | -4.125513 | 1.037169  |
| H  | 0.128054  | -2.280784 | 1.548329  |
| C  | -2.842502 | -3.883388 | -0.335005 |
| C  | -1.964778 | -4.696453 | 0.374959  |
| H  | -0.167614 | -4.751028 | 1.580647  |
| H  | -3.668890 | -4.316633 | -0.900929 |
| H  | -2.118961 | -5.777241 | 0.394572  |
| C  | 1.020126  | 2.058859  | -0.046791 |
| C  | 1.768147  | 2.540400  | 1.058750  |
| C  | 1.465065  | 2.349426  | -1.362729 |
| C  | 2.893685  | 3.347127  | 0.837549  |
| C  | 2.604546  | 3.144343  | -1.551271 |
| C  | 3.317156  | 3.648171  | -0.458888 |
| S  | -3.747367 | -1.561808 | -1.470250 |
| O  | -4.268036 | -2.567806 | -2.443097 |
| O  | -2.843058 | -0.597770 | -2.171887 |
| O  | -4.782918 | -0.933370 | -0.634081 |
| Cu | 1.191877  | -1.169032 | -0.840224 |
| C  | -2.888515 | 0.239933  | 2.130724  |
| C  | -4.270239 | 0.386195  | 2.344647  |
| C  | -2.071828 | -0.171419 | 3.201699  |
| C  | -4.824838 | 0.110224  | 3.598091  |
| H  | -4.918665 | 0.722658  | 1.545983  |
| C  | -2.630991 | -0.446899 | 4.452468  |
| H  | -1.003860 | -0.283902 | 3.066740  |
| C  | -4.006638 | -0.308128 | 4.650226  |
| H  | -5.889734 | 0.223952  | 3.754575  |
| H  | -1.997017 | -0.767531 | 5.268983  |
| H  | -4.438109 | -0.521073 | 5.619708  |
| C  | -1.958145 | 2.978789  | 0.059421  |
| C  | -2.113814 | 4.211937  | 0.719411  |
| C  | -2.325944 | 2.882183  | -1.295187 |
| C  | -2.625666 | 5.320305  | 0.038171  |
| H  | -1.835566 | 4.319917  | 1.760394  |
| C  | -2.836378 | 3.992952  | -1.972491 |
| H  | -2.221601 | 1.948731  | -1.827576 |
| C  | -2.986056 | 5.211246  | -1.306665 |
| H  | -2.741067 | 6.265191  | 0.553291  |
| H  | -3.116172 | 3.908611  | -3.014597 |
| H  | -3.381354 | 6.070618  | -1.832596 |
| N  | -1.340685 | -0.520259 | 0.358172  |
| N  | -0.153353 | 1.286489  | 0.156800  |
| C  | 2.460198  | -2.296733 | -1.871682 |
| C  | 2.702589  | -1.819315 | -3.289712 |
| H  | 3.419088  | -2.451266 | -3.849955 |
| B  | 3.455323  | -1.974879 | -0.779901 |
| O  | 3.552644  | -2.659589 | 0.444907  |
| O  | 4.340021  | -0.887004 | -0.793233 |
| C  | 4.235886  | -1.785699 | 1.358344  |
| C  | 5.140069  | -0.948837 | 0.396286  |
| C  | 3.177804  | -0.926428 | 2.037144  |
| H  | 2.452684  | -1.571236 | 2.553450  |
| H  | 3.604331  | -0.235217 | 2.777814  |
| H  | 2.625596  | -0.339493 | 1.285326  |
| C  | 4.989549  | -2.610399 | 2.378617  |
| H  | 5.595705  | -1.969020 | 3.035295  |
| H  | 4.286646  | -3.167342 | 3.013535  |
| H  | 5.654914  | -3.338492 | 1.899109  |
| C  | 6.437223  | -1.665967 | 0.050185  |
| H  | 7.138085  | -1.684067 | 0.896966  |
| H  | 6.248239  | -2.702605 | -0.262313 |
| H  | 6.929824  | -1.147834 | -0.784057 |
| C  | 5.427566  | 0.460667  | 0.870527  |
| H  | 4.505151  | 1.040549  | 0.986271  |
| H  | 5.956906  | 0.458243  | 1.834916  |
| H  | 6.060762  | 0.986804  | 0.142764  |
| Na | -2.922157 | -1.686520 | -4.252732 |
| H  | 3.124099  | -0.801848 | -3.307673 |
| H  | 2.052074  | -3.320247 | -1.812530 |
| H  | 1.789836  | -1.781083 | -3.909389 |

|   |           |          |           |
|---|-----------|----------|-----------|
| C | 1.425461  | 2.178564 | 2.479384  |
| H | 2.344733  | 2.118419 | 3.100313  |
| H | 0.760112  | 2.954203 | 2.911713  |
| H | 0.936368  | 1.185036 | 2.536101  |
| C | 0.760613  | 1.843320 | -2.594588 |
| H | 1.477892  | 1.278191 | -3.226134 |
| H | -0.084080 | 1.168029 | -2.369188 |
| H | 0.370423  | 2.704065 | -3.177418 |
| C | 4.542538  | 4.489830 | -0.662474 |
| H | 4.395355  | 5.483502 | -0.189372 |
| H | 5.418043  | 3.991197 | -0.195384 |
| H | 4.759680  | 4.642784 | -1.741048 |
| H | 2.937910  | 3.368407 | -2.558155 |
| H | 3.460876  | 3.724580 | 1.680925  |

123

Figure\_S9\_imid-2\_modeA.ed(AS) / electronic energy: -4442.824230082218 a.u. / lowest freq: -7.03 cm<sup>-1</sup>

|    |           |           |           |
|----|-----------|-----------|-----------|
| C  | 0.884598  | 2.216842  | 1.640257  |
| H  | -0.027365 | 2.753898  | 1.935143  |
| C  | 1.603139  | 2.833048  | 0.422792  |
| H  | 2.696280  | 2.835519  | 0.562730  |
| C  | 0.686658  | 0.742986  | -0.210985 |
| C  | -0.086393 | -0.129702 | 1.932670  |
| C  | 0.657323  | -1.303341 | 2.109834  |
| C  | -1.309437 | 0.014761  | 2.615979  |
| C  | 0.232265  | -2.290265 | 2.996076  |
| H  | 1.592425  | -1.411236 | 1.549052  |
| C  | -1.732925 | -0.991837 | 3.487953  |
| C  | -0.959258 | -2.129451 | 3.698497  |
| H  | 0.835091  | -3.191180 | 3.135629  |
| H  | -2.689327 | -0.861924 | 3.997170  |
| H  | -1.298631 | -2.896875 | 4.397762  |
| S  | -2.389704 | 1.442610  | 2.441272  |
| O  | -3.717200 | 0.997510  | 2.963528  |
| O  | -2.476516 | 1.736184  | 0.980742  |
| O  | -1.782042 | 2.521007  | 3.246256  |
| Cu | 0.191548  | -0.957666 | -1.158002 |
| C  | 1.781673  | 2.086040  | 2.848830  |
| C  | 1.531560  | 2.855235  | 3.999285  |
| C  | 2.877441  | 1.201956  | 2.846325  |
| C  | 2.354110  | 2.735617  | 5.123471  |
| H  | 0.704192  | 3.552678  | 4.026818  |
| C  | 3.695658  | 1.084212  | 3.972933  |
| H  | 3.091091  | 0.594217  | 1.979387  |
| C  | 3.434233  | 1.850139  | 5.110905  |
| H  | 2.154427  | 3.331230  | 6.004831  |
| H  | 4.532402  | 0.397922  | 3.964115  |
| H  | 4.069236  | 1.758466  | 5.982534  |
| N  | 0.473012  | 0.888172  | 1.110585  |
| N  | 1.251573  | 1.881044  | -0.653319 |
| C  | -1.314694 | -2.268088 | -1.563750 |
| C  | -1.161824 | -3.555240 | -0.876703 |
| C  | -0.845667 | -4.716661 | -1.606542 |
| C  | -1.390330 | -3.696677 | 0.504745  |
| C  | -0.753131 | -5.958524 | -0.984168 |
| C  | -1.294838 | -4.936895 | 1.128033  |
| C  | -0.976200 | -6.077398 | 0.388448  |
| H  | -0.511042 | -6.843258 | -1.578377 |
| H  | -1.477483 | -5.014007 | 2.203887  |
| H  | -0.905215 | -7.051738 | 0.877850  |
| C  | -1.840029 | -1.099417 | -0.971107 |
| C  | -2.522952 | -0.090978 | -1.812804 |
| H  | -2.603383 | 0.883581  | -1.313158 |
| H  | -2.036114 | 0.035189  | -2.788514 |
| H  | -1.658805 | -2.820510 | 1.099544  |
| H  | -2.125746 | -1.095664 | 0.087114  |
| P  | -5.115503 | -0.071587 | -1.286107 |
| O  | -4.944713 | -0.700629 | 0.195363  |
| O  | -5.350361 | 1.386763  | -1.084820 |
| O  | -6.260478 | -0.906943 | -2.029457 |
| O  | -3.888569 | -0.541391 | -2.170530 |
| Na | -4.972020 | 1.856834  | 1.151787  |
| H  | -1.336116 | -2.331165 | -2.660194 |
| H  | -0.691329 | -4.639292 | -2.686141 |
| C  | -4.765291 | -2.100542 | 0.407092  |
| H  | -4.264048 | -2.221208 | 1.374832  |
| H  | -5.737451 | -2.612236 | 0.433751  |
| H  | -4.139191 | -2.547531 | -0.379083 |
| C  | -7.628035 | -0.651428 | -1.711357 |
| H  | -8.229604 | -1.321796 | -2.332032 |
| H  | -7.836832 | -0.862371 | -0.652243 |
| H  | -7.897143 | 0.389544  | -1.934015 |
| C  | 1.790043  | 1.999563  | -1.962600 |
| C  | 3.172082  | 1.774514  | -2.201426 |
| C  | 0.968725  | 2.438264  | -3.031533 |
| C  | 3.707363  | 2.020680  | -3.473508 |
| C  | 1.530981  | 2.666136  | -4.295424 |
| C  | 2.896027  | 2.464549  | -4.520155 |
| H  | -0.958081 | 3.796836  | 0.023125  |

|   |           |           |           |
|---|-----------|-----------|-----------|
| H | -1.633993 | 6.090220  | -0.548810 |
| C | -0.197148 | 4.556292  | -0.083674 |
| C | -0.586122 | 5.858670  | -0.408268 |
| C | 1.162526  | 4.241015  | 0.099395  |
| C | 0.375017  | 6.860973  | -0.553316 |
| H | 0.072151  | 7.868892  | -0.805814 |
| C | 2.121122  | 5.260726  | -0.048538 |
| C | 1.727181  | 6.562311  | -0.372934 |
| H | 3.175520  | 5.049876  | 0.079685  |
| H | 2.471685  | 7.339573  | -0.487060 |
| C | 1.794135  | -1.680882 | -2.200822 |
| H | 2.255985  | -0.709635 | -2.432701 |
| C | 1.434068  | -2.423001 | -3.471057 |
| H | 0.719805  | -1.876809 | -4.112166 |
| H | 2.309263  | -2.642145 | -4.113522 |
| H | 0.973687  | -3.400265 | -3.257837 |
| B | 2.620306  | -2.419127 | -1.162636 |
| O | 3.214483  | -1.826487 | -0.041636 |
| O | 2.892426  | -3.784244 | -1.189683 |
| C | 3.498418  | -4.140199 | 0.067144  |
| C | 4.130328  | -2.783288 | 0.518350  |
| C | 2.377614  | -4.595945 | 0.986115  |
| H | 1.635704  | -3.795082 | 1.125004  |
| H | 1.850970  | -5.443624 | 0.526809  |
| H | 2.743093  | -4.914762 | 1.973335  |
| C | 4.495366  | -5.256621 | -0.156620 |
| H | 5.229295  | -4.997795 | -0.929845 |
| H | 5.039508  | -5.491112 | 0.770265  |
| H | 3.977364  | -6.170336 | -0.478977 |
| C | 5.491475  | -2.537134 | -0.115627 |
| H | 6.266894  | -3.194612 | 0.301655  |
| H | 5.456677  | -2.691574 | -1.203278 |
| H | 5.795221  | -1.497097 | 0.065258  |
| C | 4.209531  | -2.590115 | 2.018014  |
| H | 4.636987  | -1.605171 | 2.251301  |
| H | 3.224668  | -2.649522 | 2.498587  |
| H | 4.857163  | -3.350779 | 2.478383  |
| C | 4.100044  | 1.226151  | -1.151445 |
| H | 4.682309  | 0.378286  | -1.570590 |
| H | 4.803645  | 2.019246  | -0.823104 |
| H | 3.554860  | 0.835467  | -0.274514 |
| C | -0.502511 | 2.700295  | -2.868151 |
| H | -0.704919 | 3.782306  | -3.012492 |
| H | -1.070204 | 2.126867  | -3.630299 |
| H | -0.877015 | 2.402649  | -1.873280 |
| C | 3.496957  | 2.710843  | -5.873007 |
| H | 3.949157  | 1.772025  | -6.256580 |
| H | 2.734463  | 3.057051  | -6.602877 |
| H | 4.286117  | 3.487999  | -5.794522 |
| H | 4.762956  | 1.851279  | -3.654593 |
| H | 0.898762  | 3.008519  | -5.106775 |

123

Figure\_S9\_imid-2\_modeA\_ts(AS)\_01 / electronic energy: -4442.810823094441 a.u. / lowest freq: -256.81 cm-1

|    |           |           |           |
|----|-----------|-----------|-----------|
| C  | -1.004553 | -2.433521 | -1.210225 |
| H  | -1.993032 | -2.225345 | -1.641565 |
| C  | -1.060903 | -2.937022 | 0.247757  |
| H  | -0.370367 | -3.780233 | 0.405208  |
| C  | -0.057929 | -0.794510 | 0.223075  |
| C  | 0.174986  | -0.348525 | -2.146642 |
| C  | 1.547607  | -0.065665 | -2.191602 |
| C  | -0.662244 | 0.154752  | -3.159612 |
| C  | 2.088284  | 0.681971  | -3.233275 |
| H  | 2.186285  | -0.469133 | -1.397600 |
| C  | -0.104772 | 0.912465  | -4.193963 |
| C  | 1.260840  | 1.172884  | -4.240931 |
| H  | 3.163585  | 0.876924  | -3.261904 |
| H  | -0.774833 | 1.306678  | -4.959628 |
| H  | 1.675431  | 1.759953  | -5.062861 |
| S  | -2.439800 | -0.117712 | -3.239157 |
| O  | -2.962054 | 0.983921  | -4.099384 |
| O  | -2.955172 | 0.030469  | -1.842851 |
| O  | -2.614802 | -1.462936 | -3.812930 |
| Cu | 0.902874  | 0.940681  | 0.665059  |
| C  | -0.258020 | -3.381949 | -2.117501 |
| C  | -0.954762 | -4.127629 | -3.084297 |
| C  | 1.133858  | -3.557384 | -1.994464 |
| C  | -0.271234 | -5.012200 | -3.923853 |
| H  | -2.028406 | -4.033462 | -3.183077 |
| C  | 1.813104  | -4.441661 | -2.836801 |
| H  | 1.694256  | -3.005375 | -1.252946 |
| C  | 1.111629  | -5.166986 | -3.802268 |
| H  | -0.815063 | -5.581095 | -4.666834 |
| H  | 2.883764  | -4.565993 | -2.740232 |
| H  | 1.638817  | -5.852529 | -4.453016 |
| N  | -0.286453 | -1.138008 | -1.059192 |
| N  | -0.568830 | -1.761979 | 0.998931  |
| C  | 1.038587  | 2.980798  | 0.512573  |
| C  | 2.290763  | 3.621907  | 0.104050  |

|    |           |           |           |
|----|-----------|-----------|-----------|
| C  | 2.998859  | 4.423756  | 1.018385  |
| C  | 2.798138  | 3.516879  | -1.204188 |
| C  | 4.171456  | 5.075540  | 0.647916  |
| C  | 3.964093  | 4.174937  | -1.577250 |
| C  | 4.662584  | 4.953499  | -0.652215 |
| H  | 4.700122  | 5.693551  | 1.377509  |
| H  | 4.336178  | 4.073396  | -2.600378 |
| H  | 5.580025  | 5.469094  | -0.945417 |
| C  | 0.047265  | 2.522630  | -0.397550 |
| C  | -1.250914 | 2.180187  | 0.028600  |
| H  | -1.864784 | 1.527754  | -0.598156 |
| H  | -1.436228 | 2.124549  | 1.102626  |
| H  | 2.270218  | 2.908196  | -1.941296 |
| H  | 0.258868  | 2.501446  | -1.472372 |
| P  | -3.827090 | 3.604439  | 0.254464  |
| O  | -4.371327 | 5.098253  | 0.595228  |
| O  | -4.847705 | 2.955055  | -0.634508 |
| O  | -3.739302 | 2.866613  | 1.709238  |
| O  | -2.355722 | 3.730989  | -0.183946 |
| Na | -4.509757 | 1.824623  | -2.510917 |
| H  | 0.696101  | 3.242548  | 1.523701  |
| H  | 2.604923  | 4.548956  | 2.030249  |
| C  | -3.595469 | 5.945656  | 1.425677  |
| H  | -4.162802 | 6.871050  | 1.576098  |
| H  | -3.406191 | 5.483512  | 2.407086  |
| H  | -2.629723 | 6.188756  | 0.959365  |
| C  | -4.933789 | 2.423441  | 2.328244  |
| H  | -4.667037 | 2.014292  | 3.309474  |
| H  | -5.645270 | 3.251049  | 2.476199  |
| H  | -5.426843 | 1.638697  | 1.736460  |
| C  | -0.389043 | -1.790719 | 2.406942  |
| C  | 0.614209  | -2.609254 | 2.990069  |
| C  | -1.259653 | -1.057768 | 3.252296  |
| C  | 0.696555  | -2.720321 | 4.385054  |
| C  | -1.143622 | -1.178466 | 4.644278  |
| C  | -0.176071 | -2.011657 | 5.214130  |
| H  | -3.422847 | -1.504007 | 0.188380  |
| H  | -5.639328 | -2.212396 | 0.980267  |
| C  | -3.538260 | -2.492678 | 0.605318  |
| C  | -4.800090 | -2.891912 | 1.053747  |
| C  | -2.437481 | -3.364084 | 0.698724  |
| C  | -4.979086 | -4.165202 | 1.597970  |
| H  | -5.956766 | -4.472765 | 1.945711  |
| C  | -2.631511 | -4.645479 | 1.247668  |
| C  | -3.895949 | -5.041445 | 1.693796  |
| H  | -1.804105 | -5.338228 | 1.338497  |
| H  | -4.035181 | -6.027835 | 2.117007  |
| C  | 2.310515  | 0.575212  | 2.088300  |
| H  | 1.793318  | -0.274855 | 2.551882  |
| C  | 2.579084  | 1.653498  | 3.109982  |
| H  | 1.664114  | 2.076347  | 3.558810  |
| H  | 3.187516  | 1.280542  | 3.954572  |
| H  | 3.147617  | 2.492375  | 2.684679  |
| B  | 3.491223  | 0.083310  | 1.252375  |
| O  | 3.457366  | -1.037915 | 0.427946  |
| O  | 4.733006  | 0.693440  | 1.216627  |
| C  | 5.508873  | 0.060546  | 0.176238  |
| C  | 4.816514  | -1.337216 | 0.047200  |
| C  | 5.342322  | 0.908334  | -1.071944 |
| H  | 4.283118  | 0.959100  | -1.364465 |
| H  | 5.672978  | 1.934971  | -0.864437 |
| H  | 5.924789  | 0.523201  | -1.921010 |
| C  | 6.960274  | 0.009017  | 0.600189  |
| H  | 7.082463  | -0.464869 | 1.581678  |
| H  | 7.563969  | -0.549227 | -0.130090 |
| H  | 7.372467  | 1.025022  | 0.665914  |
| C  | 5.352065  | -2.350804 | 1.046799  |
| H  | 6.375831  | -2.666307 | 0.802519  |
| H  | 5.351485  | -1.945289 | 2.068387  |
| H  | 4.713423  | -3.244111 | 1.039695  |
| C  | 4.829258  | -1.921347 | -1.349168 |
| H  | 4.328049  | -2.898518 | -1.354918 |
| H  | 4.315958  | -1.278907 | -2.075616 |
| H  | 5.860225  | -2.075563 | -1.699366 |
| C  | 1.655117  | -3.325040 | 2.171787  |
| H  | 2.662527  | -3.131899 | 2.597372  |
| H  | 1.459688  | -4.417410 | 2.191221  |
| H  | 1.680451  | -2.975181 | 1.123314  |
| C  | -2.332411 | -0.147311 | 2.721554  |
| H  | -3.329556 | -0.530818 | 3.023785  |
| H  | -2.195592 | 0.869187  | 3.146268  |
| H  | -2.313474 | -0.057359 | 1.620789  |
| C  | -0.054749 | -2.141716 | 6.704187  |
| H  | 0.956438  | -1.814496 | 7.025846  |
| H  | -0.809324 | -1.520642 | 7.232214  |
| H  | -0.203909 | -3.201723 | 6.999216  |
| H  | 1.459807  | -3.348827 | 4.830224  |
| H  | -1.816410 | -0.620938 | 5.285952  |



123

Figure\_S9\_imid-2\_modeA ts(AS)\_02 / electronic energy: -4442.811963393518 a.u. / lowest freq: -238.21 cm-1

|    |           |           |           |
|----|-----------|-----------|-----------|
| C  | 0.269581  | 2.423842  | 1.581451  |
| H  | -0.744823 | 2.776167  | 1.810738  |
| C  | 0.921862  | 3.140285  | 0.379864  |
| H  | 1.970248  | 3.404702  | 0.590289  |
| C  | 0.525871  | 0.881714  | -0.202302 |
| C  | -0.221506 | -0.070960 | 1.907008  |
| C  | 0.708347  | -1.106108 | 2.071910  |
| C  | -1.457150 | -0.144317 | 2.577732  |
| C  | 0.440543  | -2.175306 | 2.922754  |
| H  | 1.664232  | -1.035506 | 1.540532  |
| C  | -1.714062 | -1.227558 | 3.422333  |
| C  | -0.769136 | -2.232280 | 3.610411  |
| H  | 1.182975  | -2.967052 | 3.051677  |
| H  | -2.682972 | -1.270470 | 3.922756  |
| H  | -0.984955 | -3.063530 | 4.285253  |
| S  | -2.774819 | 1.066899  | 2.387116  |
| O  | -4.009503 | 0.379871  | 2.864726  |
| O  | -2.861336 | 1.342130  | 0.920671  |
| O  | -2.397221 | 2.234072  | 3.206030  |
| Cu | 0.452831  | -0.945899 | -1.062002 |
| C  | 1.107565  | 2.507922  | 2.835635  |
| C  | 0.666509  | 3.275577  | 3.928186  |
| C  | 2.340974  | 1.835047  | 2.930220  |
| C  | 1.435394  | 3.356529  | 5.092995  |
| H  | -0.267904 | 3.819513  | 3.878074  |
| C  | 3.105271  | 1.917610  | 4.097196  |
| H  | 2.705752  | 1.236972  | 2.107608  |
| C  | 2.652528  | 2.676763  | 5.178262  |
| H  | 1.088078  | 3.949067  | 5.929479  |
| H  | 4.049095  | 1.392402  | 4.163849  |
| H  | 3.245956  | 2.740405  | 6.081126  |
| N  | 0.162227  | 1.024135  | 1.084911  |
| N  | 0.886287  | 2.089654  | -0.660356 |
| C  | -0.578007 | -2.661215 | -1.486732 |
| C  | -0.150178 | -3.933271 | -0.898461 |
| C  | 0.476703  | -4.907833 | -1.698866 |
| C  | -0.397402 | -4.258086 | 0.449586  |
| C  | 0.864179  | -6.135199 | -1.170785 |
| C  | -0.012396 | -5.485426 | 0.977105  |
| C  | 0.626214  | -6.430721 | 0.172458  |
| H  | 1.346498  | -6.872470 | -1.816948 |
| H  | -0.217369 | -5.706605 | 2.028358  |
| H  | 0.928551  | -7.395192 | 0.587069  |
| C  | -1.451062 | -1.743962 | -0.831398 |
| C  | -2.104467 | -0.717510 | -1.532630 |
| H  | -2.555802 | 0.101509  | -0.966485 |
| H  | -1.770659 | -0.479642 | -2.543444 |
| H  | -0.910386 | -3.544247 | 1.095877  |
| H  | -1.719761 | -1.885800 | 0.220690  |
| P  | -4.996455 | -1.119785 | -1.467031 |
| O  | -4.757588 | -1.585093 | 0.097674  |
| O  | -5.507633 | 0.285825  | -1.331238 |
| O  | -6.097853 | -2.167999 | -2.035467 |
| O  | -3.744511 | -1.456965 | -2.287575 |
| Na | -5.261894 | 0.807180  | 0.877328  |
| H  | -0.568193 | -2.633327 | -2.584530 |
| H  | 0.638147  | -4.702139 | -2.759710 |
| C  | -4.398736 | -2.923431 | 0.397951  |
| H  | -3.923095 | -2.933189 | 1.387610  |
| H  | -5.285672 | -3.574797 | 0.423831  |
| H  | -3.689589 | -3.326382 | -0.342185 |
| C  | -7.454243 | -2.013769 | -1.647996 |
| H  | -8.030736 | -2.795980 | -2.153822 |
| H  | -7.580943 | -2.132498 | -0.560140 |
| H  | -7.847252 | -1.030368 | -1.942861 |
| C  | 1.463896  | 2.280949  | -1.943287 |
| C  | 2.871980  | 2.388616  | -2.092421 |
| C  | 0.634176  | 2.448805  | -3.080457 |
| C  | 3.416219  | 2.702935  | -3.345366 |
| C  | 1.208692  | 2.752095  | -4.322934 |
| C  | 2.593822  | 2.886457  | -4.459414 |
| H  | -1.749136 | 3.452650  | -0.258425 |
| H  | -2.891432 | 5.496058  | -1.010684 |
| C  | -1.180725 | 4.366240  | -0.354301 |
| C  | -1.834093 | 5.525341  | -0.781428 |
| C  | 0.194471  | 4.389886  | -0.055491 |
| C  | -1.124516 | 6.720474  | -0.914512 |
| H  | -1.631742 | 7.617072  | -1.246496 |
| C  | 0.897823  | 5.601047  | -0.192360 |
| C  | 0.239926  | 6.758325  | -0.619485 |
| H  | 1.957723  | 5.651165  | 0.023858  |
| H  | 0.789527  | 7.684823  | -0.724315 |
| C  | 2.196581  | -1.278946 | -2.054084 |
| H  | 2.408091  | -0.220911 | -2.257212 |
| C  | 2.081407  | -2.056167 | -3.342828 |
| H  | 1.285729  | -1.684998 | -4.010355 |

|   |           |           |           |
|---|-----------|-----------|-----------|
| H | 3.015235  | -2.017206 | -3.933923 |
| H | 1.884388  | -3.124055 | -3.170557 |
| B | 3.128377  | -1.807103 | -0.966025 |
| O | 3.492009  | -1.088416 | 0.169599  |
| O | 3.723294  | -3.055672 | -0.980746 |
| C | 4.332119  | -3.264633 | 0.312846  |
| C | 4.579825  | -1.799428 | 0.797291  |
| C | 3.306909  | -3.989730 | 1.167314  |
| H | 2.392162  | -3.386072 | 1.264526  |
| H | 3.020877  | -4.933827 | 0.683227  |
| H | 3.685544  | -4.221126 | 2.173235  |
| C | 5.584080  | -4.096317 | 0.145585  |
| H | 6.268792  | -3.660414 | -0.592132 |
| H | 6.122383  | -4.194174 | 1.099695  |
| H | 5.324810  | -5.107871 | -0.195230 |
| C | 5.874009  | -1.213426 | 0.253882  |
| H | 6.758490  | -1.664617 | 0.724835  |
| H | 5.952662  | -1.355063 | -0.833165 |
| H | 5.898037  | -0.133918 | 0.454177  |
| C | 4.505904  | -1.606712 | 2.296801  |
| H | 4.679677  | -0.552670 | 2.552267  |
| H | 3.529755  | -1.893768 | 2.707830  |
| H | 5.277010  | -2.203284 | 2.805564  |
| C | 3.831283  | 2.118557  | -0.964464 |
| H | 4.621280  | 1.415890  | -1.304828 |
| H | 4.307195  | 3.068301  | -0.642936 |
| H | 3.337464  | 1.645571  | -0.096793 |
| C | -0.864272 | 2.334709  | -3.016466 |
| H | -1.321264 | 3.320577  | -3.244004 |
| H | -1.213177 | 1.597613  | -3.769733 |
| H | -1.225517 | 2.000438  | -2.027349 |
| C | 3.207175  | 3.212856  | -5.789526 |
| H | 3.899531  | 2.398618  | -6.090661 |
| H | 2.434773  | 3.327209  | -6.579617 |
| H | 3.776047  | 4.163474  | -5.714475 |
| H | 4.491223  | 2.788844  | -3.458253 |
| H | 0.569028  | 2.887970  | -5.187535 |

123

Figure\_S9\_imid-2\_modeA ts(AS)\_03 / electronic energy: -4442.811278359693 a.u. / lowest freq: -239.08 cm-1

|    |           |           |           |
|----|-----------|-----------|-----------|
| C  | 2.758738  | -1.600401 | 0.625757  |
| H  | 3.425640  | -1.044968 | -0.046175 |
| C  | 2.041636  | -2.787943 | -0.050328 |
| H  | 2.065529  | -3.681133 | 0.591803  |
| C  | 0.437898  | -1.126533 | 0.473669  |
| C  | 1.735702  | 0.449645  | 1.787897  |
| C  | 0.957571  | 0.493478  | 2.953290  |
| C  | 2.605941  | 1.519443  | 1.509939  |
| C  | 1.075025  | 1.543843  | 3.857004  |
| H  | 0.279175  | -0.338402 | 3.157728  |
| C  | 2.727108  | 2.562850  | 2.432749  |
| C  | 1.984493  | 2.569726  | 3.609564  |
| H  | 0.459596  | 1.551763  | 4.759062  |
| H  | 3.407014  | 3.383413  | 2.195687  |
| H  | 2.098512  | 3.390927  | 4.320471  |
| S  | 3.562253  | 1.649366  | -0.006506 |
| O  | 3.868935  | 3.102091  | -0.156321 |
| O  | 2.652978  | 1.190922  | -1.100775 |
| O  | 4.758934  | 0.808454  | 0.182819  |
| Cu | -1.105652 | 0.145867  | 0.764610  |
| C  | 3.538883  | -2.014947 | 1.850667  |
| C  | 4.944760  | -2.009279 | 1.825587  |
| C  | 2.880234  | -2.433179 | 3.022643  |
| C  | 5.674453  | -2.395408 | 2.953841  |
| H  | 5.478311  | -1.714966 | 0.931000  |
| C  | 3.613793  | -2.816996 | 4.148481  |
| H  | 1.800477  | -2.452019 | 3.069968  |
| C  | 5.009815  | -2.796601 | 4.114959  |
| H  | 6.756402  | -2.386386 | 2.926642  |
| H  | 3.099171  | -3.130285 | 5.047598  |
| H  | 5.576573  | -3.094807 | 4.987453  |
| N  | 1.618221  | -0.708245 | 0.969650  |
| N  | 0.651029  | -2.290857 | -0.159202 |
| C  | -1.871544 | 2.031733  | 0.576211  |
| C  | -2.035697 | 2.812592  | 1.804250  |
| C  | -3.279945 | 2.821862  | 2.466340  |
| C  | -0.996582 | 3.593661  | 2.341343  |
| C  | -3.468265 | 3.573262  | 3.621670  |
| C  | -1.189243 | 4.347561  | 3.495064  |
| C  | -2.424375 | 4.339909  | 4.144202  |
| H  | -4.441442 | 3.564710  | 4.118978  |
| H  | -0.366053 | 4.949557  | 3.889136  |
| H  | -2.574891 | 4.933820  | 5.048757  |
| C  | -0.666940 | 1.969104  | -0.181421 |
| C  | -0.651085 | 1.570979  | -1.526956 |
| H  | 0.307847  | 1.326146  | -1.985762 |
| H  | -1.526392 | 1.074598  | -1.947822 |
| H  | -0.023226 | 3.617243  | 1.846594  |
| H  | 0.270721  | 2.365089  | 0.225862  |

P 0.270851 3.827538 -3.100364  
 O 1.096369 4.374237 -1.779851  
 O 1.338035 3.114684 -3.881249  
 O -0.288920 5.171570 -3.815300  
 O -1.013958 3.122080 -2.641433  
 Na 3.145412 3.152646 -2.453829  
 H -2.807817 1.819545 0.041793  
 H -4.093798 2.219187 2.056035  
 C 0.451547 5.149094 -0.784103  
 H 1.083057 5.128296 0.113585  
 H 0.330779 6.193782 -1.109405  
 H -0.540686 4.740528 -0.536427  
 C 0.626336 6.011756 -4.501672  
 H 0.044820 6.798527 -4.994107  
 H 1.338727 6.484132 -3.806864  
 H 1.191233 5.453381 -5.261609  
 C -0.407910 -3.104552 -0.645948  
 C -0.844070 -4.241381 0.087168  
 C -0.963195 -2.858147 -1.927283  
 C -1.814179 -5.092553 -0.460597  
 C -1.927967 -3.731341 -2.449525  
 C -2.361834 -4.841207 -1.719801  
 H 2.498678 -1.174529 -2.249180  
 H 3.395261 -1.831075 -4.441944  
 C 2.770841 -2.206136 -2.416321  
 C 3.281086 -2.574760 -3.663943  
 C 2.614472 -3.163458 -1.396536  
 C 3.642499 -3.901016 -3.908554  
 H 4.036792 -4.185113 -4.875608  
 C 2.984549 -4.496451 -1.655421  
 C 3.495121 -4.860664 -2.904878  
 H 2.872767 -5.258098 -0.893742  
 H 3.774736 -5.888733 -3.095512  
 C -2.485304 -0.555667 2.091751  
 H -2.571305 0.271726 2.814947  
 C -2.062521 -1.854056 2.735112  
 H -1.022297 -1.878126 3.103993  
 H -2.691768 -2.103003 3.609201  
 H -2.180168 -2.690543 2.034469  
 B -3.677987 -0.652664 1.135052  
 O -4.656345 0.317213 0.959581  
 O -3.908533 -1.745279 0.309251  
 C -4.966870 -1.385929 -0.606786  
 C -5.724550 -0.273624 0.186779  
 C -4.321490 -0.838875 -1.868330  
 H -3.703320 0.043892 -1.648810  
 H -3.678144 -1.602591 -2.318221  
 H -5.068347 -0.552280 -2.620769  
 C -5.788673 -2.616846 -0.918556  
 H -6.141952 -3.113020 -0.006414  
 H -6.662769 -2.362385 -1.535300  
 H -5.185370 -3.341042 -1.481749  
 C -6.731853 -0.845410 1.171759  
 H -7.614556 -1.256072 0.662381  
 H -6.285551 -1.642270 1.783144  
 H -7.072729 -0.051595 1.849746  
 C -6.363655 0.797467 -0.669734  
 H -6.890244 1.525623 -0.038066  
 H -5.620242 1.346051 -1.260828  
 H -7.101014 0.362030 -1.359521  
 C -0.299723 -4.593197 1.446403  
 H -1.122791 -4.922057 2.115987  
 H 0.430941 -5.423299 1.350651  
 H 0.185098 -3.728272 1.935402  
 C -0.526516 -1.708847 -2.792796  
 H -0.025719 -2.100197 -3.703061  
 H -1.409108 -1.112390 -3.101874  
 H 0.172689 -1.031552 -2.274165  
 C -3.401349 -5.769261 -2.276531  
 H -4.274828 -5.804855 -1.591891  
 H -3.753047 -5.437226 -3.276500  
 H -2.975826 -6.790183 -2.373799  
 H -2.146248 -5.960381 0.098251  
 H -2.341109 -3.542827 -3.433878

123

Figure\_S9\_imid-2\_modeA\_ts(AS)\_04 / electronic energy: -4442.810573649339 a.u. / lowest freq: -253.19 cm<sup>-1</sup>

C 2.926049 0.643990 -1.056116  
 H 3.473042 0.324991 -0.157961  
 C 2.322680 2.060157 -0.955656  
 H 2.456748 2.611069 -1.899442  
 C 0.560063 0.486699 -0.945633  
 C 1.695319 -1.583862 -1.468538  
 C 0.886228 -1.991680 -2.539885  
 C 2.449445 -2.551071 -0.780183  
 C 0.847111 -3.319740 -2.949533  
 H 0.306922 -1.232544 -3.070931  
 C 2.423035 -3.878747 -1.219316  
 C 1.640793 -4.264480 -2.303091

|    |           |           |           |
|----|-----------|-----------|-----------|
| H  | 0.203507  | -3.609079 | -3.783238 |
| H  | 3.011630  | -4.612905 | -0.666792 |
| H  | 1.633091  | -5.308031 | -2.624684 |
| S  | 3.413618  | -2.207627 | 0.699852  |
| O  | 3.542704  | -3.527694 | 1.385165  |
| O  | 2.582535  | -1.277143 | 1.523814  |
| O  | 4.696353  | -1.643156 | 0.245566  |
| Cu | -1.104653 | -0.665771 | -0.821352 |
| C  | 3.830237  | 0.488548  | -2.255519 |
| C  | 5.225506  | 0.468014  | -2.082651 |
| C  | 3.304532  | 0.406231  | -3.559147 |
| C  | 6.074196  | 0.340877  | -3.186244 |
| H  | 5.658612  | 0.560451  | -1.094682 |
| C  | 4.156746  | 0.278160  | -4.659356 |
| H  | 2.237072  | 0.432933  | -3.725999 |
| C  | 5.540376  | 0.242941  | -4.473163 |
| H  | 7.146937  | 0.322970  | -3.043676 |
| H  | 3.743742  | 0.207865  | -5.657310 |
| H  | 6.199007  | 0.145171  | -5.326413 |
| N  | 1.702251  | -0.196943 | -1.156728 |
| N  | 0.883311  | 1.776682  | -0.754210 |
| C  | -2.027658 | -2.236963 | 0.157899  |
| C  | -2.316919 | -3.443176 | -0.621363 |
| C  | -3.566209 | -3.579020 | -1.258946 |
| C  | -1.392218 | -4.496099 | -0.749484 |
| C  | -3.867406 | -4.713206 | -2.006412 |
| C  | -1.698086 | -5.630608 | -1.495012 |
| C  | -2.934736 | -5.744576 | -2.132250 |
| H  | -4.841837 | -4.795350 | -2.494597 |
| H  | -0.962769 | -6.435388 | -1.576699 |
| H  | -3.172804 | -6.635936 | -2.717479 |
| C  | -0.787833 | -1.981760 | 0.794241  |
| C  | -0.592842 | -0.923327 | 1.698715  |
| H  | 0.432347  | -0.601296 | 1.880739  |
| H  | -1.369366 | -0.164326 | 1.805006  |
| H  | -0.420863 | -4.435729 | -0.253195 |
| H  | 0.064712  | -2.646004 | 0.618677  |
| P  | 0.032242  | -1.074701 | 4.583536  |
| O  | -0.791220 | -1.052164 | 5.986508  |
| O  | 1.337578  | -1.764854 | 4.854328  |
| O  | 0.245627  | 0.504080  | 4.222288  |
| O  | -0.920990 | -1.577103 | 3.483882  |
| Na | 2.721671  | -2.827293 | 3.495373  |
| H  | -2.910883 | -1.693598 | 0.521023  |
| H  | -4.292176 | -2.768227 | -1.162707 |
| C  | -2.069349 | -0.440650 | 6.023190  |
| H  | -2.467502 | -0.564507 | 7.036758  |
| H  | -2.006927 | 0.635286  | 5.796209  |
| H  | -2.759543 | -0.910130 | 5.307024  |
| C  | 1.206809  | 1.247346  | 4.947632  |
| H  | 1.139306  | 2.290092  | 4.616890  |
| H  | 1.014374  | 1.212170  | 6.031716  |
| H  | 2.226653  | 0.879261  | 4.761936  |
| C  | -0.093221 | 2.809344  | -0.781769 |
| C  | -0.402371 | 3.482609  | -1.994584 |
| C  | -0.698700 | 3.248740  | 0.422524  |
| C  | -1.311573 | 4.550157  | -1.985492 |
| C  | -1.601414 | 4.321249  | 0.399321  |
| C  | -1.918662 | 4.966407  | -0.799016 |
| H  | 2.588548  | 1.419945  | 1.726954  |
| H  | 3.520965  | 2.818406  | 3.521731  |
| C  | 2.953184  | 2.408644  | 1.485676  |
| C  | 3.479532  | 3.200119  | 2.510270  |
| C  | 2.898515  | 2.893603  | 0.164530  |
| C  | 3.952988  | 4.483455  | 2.231523  |
| H  | 4.358552  | 5.095319  | 3.026824  |
| C  | 3.381246  | 4.188369  | -0.102750 |
| C  | 3.903696  | 4.977046  | 0.926379  |
| H  | 3.348548  | 4.593328  | -1.106598 |
| H  | 4.270155  | 5.972503  | 0.711396  |
| C  | -2.469103 | -0.440144 | -2.315001 |
| H  | -2.652330 | -1.480774 | -2.631638 |
| C  | -1.973686 | 0.430867  | -3.445563 |
| H  | -0.949908 | 0.209592  | -3.793981 |
| H  | -2.614277 | 0.346040  | -4.342518 |
| H  | -1.999984 | 1.491078  | -3.161541 |
| B  | -3.623215 | 0.143814  | -1.496257 |
| O  | -4.669216 | -0.584299 | -0.937735 |
| O  | -3.755998 | 1.495948  | -1.203861 |
| C  | -4.821696 | 1.634615  | -0.237813 |
| C  | -5.675386 | 0.356728  | -0.506165 |
| C  | -4.196782 | 1.618997  | 1.146838  |
| H  | -3.664808 | 0.675143  | 1.336261  |
| H  | -3.478560 | 2.441168  | 1.234784  |
| H  | -4.947025 | 1.751408  | 1.937917  |
| C  | -5.539592 | 2.943871  | -0.480122 |
| H  | -5.872664 | 3.040285  | -1.520458 |
| H  | -6.417217 | 3.038283  | 0.175566  |

|   |           |           |           |
|---|-----------|-----------|-----------|
| H | -4.871006 | 3.787348  | -0.262640 |
| C | -6.648863 | 0.540687  | -1.659964 |
| H | -7.488056 | 1.195642  | -1.387160 |
| H | -6.150545 | 0.970517  | -2.540347 |
| H | -7.063245 | -0.434173 | -1.950125 |
| C | -6.386639 | -0.203791 | 0.706335  |
| H | -6.974678 | -1.088204 | 0.425705  |
| H | -5.682167 | -0.508450 | 1.490185  |
| H | -7.081444 | 0.534158  | 1.132881  |
| C | 0.229618  | 3.116468  | -3.311770 |
| H | -0.519225 | 3.175373  | -4.129991 |
| H | 1.052970  | 3.825524  | -3.537858 |
| H | 0.623097  | 2.083325  | -3.307936 |
| C | -0.379699 | 2.638402  | 1.758391  |
| H | 0.129381  | 3.390514  | 2.396756  |
| H | -1.313237 | 2.316508  | 2.263377  |
| H | 0.274835  | 1.756228  | 1.670523  |
| C | -2.893928 | 6.106544  | -0.823655 |
| H | -3.740868 | 5.857968  | -1.497400 |
| H | -3.301371 | 6.318498  | 0.187776  |
| H | -2.388831 | 7.021386  | -1.198808 |
| H | -1.547942 | 5.064087  | -2.910482 |
| H | -2.057472 | 4.654858  | 1.324470  |

123

Figure\_S9\_imid-2\_modeA ts(AS)\_05 / electronic energy: -4442.807971544134 a.u. / lowest freq: -254.61 cm-1

|    |           |           |           |
|----|-----------|-----------|-----------|
| C  | -1.129093 | -2.202920 | -1.358266 |
| H  | -2.098593 | -1.896483 | -1.771229 |
| C  | -1.226809 | -2.823060 | 0.052773  |
| H  | -0.633253 | -3.747971 | 0.126191  |
| C  | -0.054703 | -0.772257 | 0.203790  |
| C  | 0.177160  | -0.124796 | -2.124021 |
| C  | 1.562977  | 0.093673  | -2.138186 |
| C  | -0.618377 | 0.473326  | -3.119592 |
| C  | 2.155216  | 0.863868  | -3.134774 |
| H  | 2.172575  | -0.386656 | -1.363984 |
| C  | -0.007316 | 1.247827  | -4.110537 |
| C  | 1.369773  | 1.439173  | -4.130563 |
| H  | 3.238395  | 1.010183  | -3.138472 |
| H  | -0.645330 | 1.711139  | -4.864463 |
| H  | 1.825850  | 2.040129  | -4.919904 |
| S  | -2.409312 | 0.323848  | -3.227361 |
| O  | -2.840459 | 1.484919  | -4.060962 |
| O  | -2.930173 | 0.465114  | -1.834197 |
| O  | -2.673577 | -0.984786 | -3.850738 |
| Cu | 0.988827  | 0.867212  | 0.789506  |
| C  | -0.449856 | -3.123711 | -2.348547 |
| C  | -1.226007 | -3.794183 | -3.315591 |
| C  | 0.886784  | -3.339839 | -2.301455 |
| C  | -0.621337 | -4.657413 | -4.234145 |
| H  | -2.299215 | -3.656952 | -3.352681 |
| C  | 1.513458  | -4.199428 | -3.212450 |
| H  | 1.498722  | -2.843838 | -1.562085 |
| C  | 0.758232  | -4.859385 | -4.184012 |
| H  | -1.219937 | -5.168913 | -4.976703 |
| H  | 2.583659  | -4.353109 | -3.162878 |
| H  | 1.238284  | -5.525409 | -4.889166 |
| N  | -0.335486 | -0.967267 | -1.100042 |
| N  | -0.607421 | -1.778805 | 0.896100  |
| C  | 1.197286  | 2.911021  | 0.781934  |
| C  | 2.441199  | 3.529643  | 0.315220  |
| C  | 3.292393  | 4.180840  | 1.228218  |
| C  | 2.801185  | 3.555191  | -1.045545 |
| C  | 4.458560  | 4.811031  | 0.802901  |
| C  | 3.962140  | 4.189305  | -1.471323 |
| C  | 4.802279  | 4.817313  | -0.549592 |
| H  | 5.098976  | 5.311442  | 1.533142  |
| H  | 4.215396  | 4.191355  | -2.534959 |
| H  | 5.714902  | 5.315813  | -0.884413 |
| C  | 0.120555  | 2.558793  | -0.078173 |
| C  | -1.148038 | 2.200157  | 0.416301  |
| H  | -1.826458 | 1.626094  | -0.218757 |
| H  | -1.257748 | 2.050438  | 1.491432  |
| H  | 2.158169  | 3.074200  | -1.784936 |
| H  | 0.245452  | 2.619619  | -1.164561 |
| P  | -3.768886 | 3.561882  | 0.576694  |
| O  | -4.381909 | 4.763902  | 1.486258  |
| O  | -4.637336 | 3.460868  | -0.643554 |
| O  | -3.902596 | 2.234566  | 1.520733  |
| O  | -2.249227 | 3.781268  | 0.462997  |
| Na | -4.362616 | 2.403699  | -2.557803 |
| H  | 0.951300  | 3.105866  | 1.835023  |
| H  | 3.015380  | 4.211394  | 2.284905  |
| C  | -3.765774 | 5.072956  | 2.724343  |
| H  | -4.279014 | 5.946505  | 3.142380  |
| H  | -3.852890 | 4.236919  | 3.436069  |
| H  | -2.700357 | 5.312131  | 2.593027  |
| C  | -5.172595 | 1.628265  | 1.670521  |
| H  | -5.085664 | 0.857896  | 2.445046  |

|   |           |           |           |
|---|-----------|-----------|-----------|
| H | -5.937481 | 2.355021  | 1.986770  |
| H | -5.506661 | 1.153326  | 0.736220  |
| C | -0.356145 | -1.986720 | 2.278538  |
| C | 0.637832  | -2.909307 | 2.700380  |
| C | -1.144706 | -1.328927 | 3.255806  |
| C | 0.793677  | -3.188499 | 4.065254  |
| C | -0.957136 | -1.619561 | 4.614464  |
| C | 0.002540  | -2.550454 | 5.023154  |
| H | -3.416660 | -1.137775 | 0.122416  |
| H | -5.695068 | -1.653165 | 0.886380  |
| C | -3.639519 | -2.136087 | 0.468219  |
| C | -4.936206 | -2.424765 | 0.901268  |
| C | -2.640996 | -3.128181 | 0.487596  |
| C | -5.253302 | -3.706551 | 1.354835  |
| H | -6.257901 | -3.928677 | 1.690701  |
| C | -2.974373 | -4.416643 | 0.944437  |
| C | -4.273693 | -4.701769 | 1.375023  |
| H | -2.228556 | -5.201091 | 0.975630  |
| H | -4.520298 | -5.694903 | 1.727587  |
| C | 2.401189  | 0.320579  | 2.151037  |
| H | 1.860075  | -0.550523 | 2.542956  |
| C | 2.699957  | 1.302948  | 3.257900  |
| H | 1.796517  | 1.701938  | 3.749392  |
| H | 3.307854  | 0.849565  | 4.062841  |
| H | 3.280795  | 2.165045  | 2.900021  |
| B | 3.560680  | -0.128140 | 1.264488  |
| O | 3.480905  | -1.153440 | 0.326805  |
| O | 4.822110  | 0.441154  | 1.276602  |
| C | 5.547160  | -0.071852 | 0.137522  |
| C | 4.821253  | -1.432899 | -0.129105 |
| C | 5.343063  | 0.927388  | -0.987083 |
| H | 4.274145  | 1.017939  | -1.230307 |
| H | 5.682547  | 1.920271  | -0.661334 |
| H | 5.892502  | 0.656754  | -1.899935 |
| C | 7.011864  | -0.196641 | 0.492878  |
| H | 7.161020  | -0.792554 | 1.401417  |
| H | 7.575813  | -0.667976 | -0.325235 |
| H | 7.446145  | 0.796985  | 0.667922  |
| C | 5.364696  | -2.565132 | 0.728604  |
| H | 6.372427  | -2.870170 | 0.414593  |
| H | 5.406472  | -2.280955 | 1.789417  |
| H | 4.705852  | -3.439160 | 0.639657  |
| C | 4.773933  | -1.854400 | -1.582466 |
| H | 4.225667  | -2.801025 | -1.683169 |
| H | 4.274305  | -1.111866 | -2.217091 |
| H | 5.787428  | -2.013312 | -1.978641 |
| C | 1.590151  | -3.571984 | 1.742437  |
| H | 2.630880  | -3.453773 | 2.110866  |
| H | 1.354663  | -4.654146 | 1.669756  |
| H | 1.554515  | -3.122391 | 0.734203  |
| C | -2.206629 | -0.326788 | 2.901400  |
| H | -3.199982 | -0.717562 | 3.205991  |
| H | -2.014803 | 0.625539  | 3.439106  |
| H | -2.235170 | -0.102880 | 1.821029  |
| C | 0.200406  | -2.862607 | 6.477557  |
| H | 1.241862  | -2.615966 | 6.773439  |
| H | -0.494345 | -2.280270 | 7.119539  |
| H | 0.019301  | -3.943681 | 6.654755  |
| H | 1.550019  | -3.896054 | 4.386329  |
| H | -1.568223 | -1.118472 | 5.356563  |

123

Figure\_S9\_imid-2\_modeA\_ts(AS)\_06 / electronic energy: -4442.809206671704 a.u. / lowest freq: -237.84 cm-1

|    |           |           |           |
|----|-----------|-----------|-----------|
| C  | 0.287500  | 2.421980  | 1.580482  |
| H  | -0.724946 | 2.779907  | 1.810125  |
| C  | 0.940055  | 3.135141  | 0.376334  |
| H  | 1.989748  | 3.396365  | 0.584057  |
| C  | 0.530489  | 0.878069  | -0.204099 |
| C  | -0.221202 | -0.069481 | 1.906303  |
| C  | 0.704649  | -1.107717 | 2.073528  |
| C  | -1.457318 | -0.136714 | 2.576660  |
| C  | 0.432526  | -2.174333 | 2.926230  |
| H  | 1.660921  | -1.041291 | 1.542382  |
| C  | -1.718841 | -1.217660 | 3.422831  |
| C  | -0.777765 | -2.225581 | 3.613190  |
| H  | 1.171853  | -2.968679 | 3.057014  |
| H  | -2.688200 | -1.255961 | 3.922748  |
| H  | -0.997148 | -3.054893 | 4.289270  |
| S  | -2.769524 | 1.079936  | 2.383337  |
| O  | -4.007129 | 0.399577  | 2.862957  |
| O  | -2.855071 | 1.351870  | 0.916306  |
| O  | -2.386403 | 2.247423  | 3.199256  |
| Cu | 0.448434  | -0.949714 | -1.062666 |
| C  | 1.127808  | 2.502571  | 2.836221  |
| C  | 0.678519  | 3.274989  | 3.926580  |
| C  | 2.312393  | 1.851150  | 2.924979  |
| C  | 1.440513  | 3.359177  | 5.095693  |
| H  | -0.255431 | 3.819034  | 3.870068  |
| C  | 3.091307  | 1.921056  | 4.086967  |

|    |           |           |           |
|----|-----------|-----------|-----------|
| H  | 2.673971  | 1.254481  | 2.099422  |
| C  | 2.654280  | 2.676146  | 5.177178  |
| H  | 1.092551  | 3.952593  | 5.931239  |
| H  | 4.032377  | 1.389479  | 4.140792  |
| H  | 3.253327  | 2.733273  | 6.076715  |
| N  | 0.167789  | 1.022932  | 1.082983  |
| N  | 0.898498  | 2.083547  | -0.662692 |
| C  | -0.589814 | -2.660598 | -1.486343 |
| C  | -0.167824 | -3.933141 | -0.895011 |
| C  | 0.453571  | -4.913025 | -1.693189 |
| C  | -0.414869 | -4.252644 | 0.454313  |
| C  | 0.836345  | -6.140410 | -1.161665 |
| C  | -0.034612 | -5.479969 | 0.985248  |
| C  | 0.598891  | -6.430592 | 0.182810  |
| H  | 1.314542  | -6.881850 | -1.806116 |
| H  | -0.239108 | -5.696824 | 2.037500  |
| H  | 0.897577  | -7.395028 | 0.600137  |
| C  | -1.459428 | -1.738380 | -0.833356 |
| C  | -2.107237 | -0.709906 | -1.536582 |
| H  | -2.555232 | 0.111991  | -0.972002 |
| H  | -1.772009 | -0.475349 | -2.547693 |
| H  | -0.923616 | -3.534357 | 1.099036  |
| H  | -1.730265 | -1.877585 | 0.218501  |
| P  | -5.000596 | -1.100580 | -1.469168 |
| O  | -4.761898 | -1.565592 | 0.095708  |
| O  | -5.505983 | 0.307194  | -1.333972 |
| O  | -6.107183 | -2.144643 | -2.035366 |
| O  | -3.751059 | -1.443525 | -2.290869 |
| Na | -5.258667 | 0.829247  | 0.874391  |
| H  | -0.579140 | -2.634944 | -2.584178 |
| H  | 0.614462  | -4.711471 | -2.754916 |
| C  | -4.409257 | -2.905338 | 0.396975  |
| H  | -3.932688 | -2.916348 | 1.386201  |
| H  | -5.299335 | -3.552346 | 0.424407  |
| H  | -3.702783 | -3.312570 | -0.343401 |
| C  | -7.462708 | -1.982965 | -1.647973 |
| H  | -8.043222 | -2.763041 | -2.152508 |
| H  | -7.589863 | -2.099409 | -0.559914 |
| H  | -7.850815 | -0.998049 | -1.944296 |
| C  | 1.477175  | 2.270476  | -1.945791 |
| C  | 2.885868  | 2.370126  | -2.094966 |
| C  | 0.648485  | 2.441619  | -3.083240 |
| C  | 3.431929  | 2.679982  | -3.348225 |
| C  | 1.224787  | 2.740358  | -4.326004 |
| C  | 2.610657  | 2.866814  | -4.462536 |
| H  | -1.730511 | 3.456066  | -0.259448 |
| H  | -2.866958 | 5.502927  | -1.011142 |
| C  | -1.159280 | 4.367760  | -0.356101 |
| C  | -1.809315 | 5.528857  | -0.782896 |
| C  | 0.216266  | 4.386993  | -0.058687 |
| C  | -1.096015 | 6.721660  | -0.916967 |
| H  | -1.600653 | 7.619805  | -1.248710 |
| C  | 0.923368  | 5.595898  | -0.196427 |
| C  | 0.268808  | 6.755188  | -0.623210 |
| H  | 1.983613  | 5.642705  | 0.018840  |
| H  | 0.821295  | 7.679888  | -0.728762 |
| C  | 2.191631  | -1.293088 | -2.052573 |
| H  | 2.406922  | -0.236473 | -2.259087 |
| C  | 2.074676  | -2.074237 | -3.338784 |
| H  | 1.281543  | -1.701803 | -4.008609 |
| H  | 3.009425  | -2.041474 | -3.928810 |
| H  | 1.872695  | -3.140650 | -3.163071 |
| B  | 3.120916  | -1.821254 | -0.962294 |
| O  | 3.485374  | -1.100943 | 0.172013  |
| O  | 3.712282  | -3.071538 | -0.973396 |
| C  | 4.319108  | -3.279410 | 0.321314  |
| C  | 4.569924  | -1.813789 | 0.803223  |
| C  | 3.291163  | -4.000551 | 1.175788  |
| H  | 2.377613  | -3.394720 | 1.270556  |
| H  | 3.003695  | -4.944935 | 0.693106  |
| H  | 3.667886  | -4.230902 | 2.182670  |
| C  | 5.569261  | -4.114426 | 0.157061  |
| H  | 6.255967  | -3.681461 | -0.580525 |
| H  | 6.106137  | -4.211912 | 1.112011  |
| H  | 5.307950  | -5.125940 | -0.182299 |
| C  | 5.866915  | -1.232702 | 0.261289  |
| H  | 6.749031  | -1.686340 | 0.734297  |
| H  | 5.946931  | -1.375903 | -0.825449 |
| H  | 5.894316  | -0.153054 | 0.460366  |
| C  | 4.493385  | -1.617341 | 2.302133  |
| H  | 4.666785  | -0.562592 | 2.554947  |
| H  | 3.516445  | -1.903017 | 2.712224  |
| H  | 5.263418  | -2.212721 | 2.813903  |
| C  | 3.843664  | 2.095901  | -0.966713 |
| H  | 4.629648  | 1.388439  | -1.306410 |
| H  | 4.324998  | 3.043280  | -0.646297 |
| H  | 3.347348  | 1.626673  | -0.098408 |
| C  | -0.850585 | 2.335800  | -3.019323 |

|   |           |          |           |
|---|-----------|----------|-----------|
| H | -1.302115 | 3.324087 | -3.247269 |
| H | -1.203500 | 1.600351 | -3.772332 |
| H | -1.213755 | 2.003821 | -2.030144 |
| C | 3.225951  | 3.188142 | -5.792988 |
| H | 3.913725  | 2.369643 | -6.093075 |
| H | 2.454275  | 3.305897 | -6.583287 |
| H | 3.800187  | 4.135615 | -5.719033 |
| H | 4.507408  | 2.759720 | -3.461142 |
| H | 0.585968  | 2.878789 | -5.190824 |

123

Figure\_S9\_imid-2\_modeA\_prod(AS) / electronic energy: -4442.821144031133 a.u. / lowest freq: 10.64 cm<sup>-1</sup>

|    |           |           |           |
|----|-----------|-----------|-----------|
| C  | 0.160199  | 2.607079  | -1.362756 |
| H  | 1.218031  | 2.783848  | -1.601771 |
| C  | -0.292280 | 3.259650  | -0.038271 |
| H  | -1.297959 | 3.696998  | -0.133216 |
| C  | -0.280022 | 0.919884  | 0.229788  |
| C  | 0.156551  | 0.113947  | -2.015779 |
| C  | -0.950216 | -0.717344 | -2.234228 |
| C  | 1.350726  | -0.123597 | -2.722322 |
| C  | -0.884690 | -1.762463 | -3.152923 |
| H  | -1.871833 | -0.510853 | -1.679093 |
| C  | 1.402583  | -1.184499 | -3.629989 |
| C  | 0.295741  | -1.999125 | -3.853218 |
| H  | -1.762634 | -2.388986 | -3.328730 |
| H  | 2.343111  | -1.366516 | -4.153203 |
| H  | 0.358501  | -2.816196 | -4.574469 |
| S  | 2.851794  | 0.864379  | -2.546992 |
| O  | 3.952660  | -0.017869 | -3.019685 |
| O  | 2.987549  | 1.134619  | -1.082186 |
| O  | 2.630411  | 2.067428  | -3.366080 |
| Cu | -0.481755 | -0.986729 | 0.841296  |
| C  | -0.694783 | 3.020931  | -2.534995 |
| C  | -0.149209 | 3.807504  | -3.564746 |
| C  | -2.049014 | 2.642230  | -2.610280 |
| C  | -0.936730 | 4.192918  | -4.653568 |
| H  | 0.882554  | 4.131637  | -3.522998 |
| C  | -2.832135 | 3.030364  | -3.701068 |
| H  | -2.496085 | 2.043891  | -1.827516 |
| C  | -2.276083 | 3.803024  | -4.722823 |
| H  | -0.508823 | 4.797484  | -5.442756 |
| H  | -3.871287 | 2.734244  | -3.754744 |
| H  | -2.884220 | 4.103210  | -5.566298 |
| N  | 0.001878  | 1.158867  | -1.059935 |
| N  | -0.360668 | 2.091922  | 0.869069  |
| C  | 0.021748  | -3.020089 | 1.061668  |
| C  | -0.836336 | -4.151020 | 0.727556  |
| C  | -1.215393 | -5.056225 | 1.736413  |
| C  | -1.267947 | -4.400765 | -0.587711 |
| C  | -1.996655 | -6.168789 | 1.440758  |
| C  | -2.042214 | -5.516099 | -0.882725 |
| C  | -2.413420 | -6.403336 | 0.130161  |
| H  | -2.276071 | -6.861662 | 2.237419  |
| H  | -2.368834 | -5.690606 | -1.910839 |
| H  | -3.025138 | -7.277472 | -0.103737 |
| C  | 0.902818  | -2.392235 | 0.135095  |
| C  | 1.653118  | -1.302878 | 0.530791  |
| H  | 2.223128  | -0.687079 | -0.166076 |
| H  | 1.853054  | -1.149835 | 1.596224  |
| H  | -0.998170 | -3.704905 | -1.386694 |
| H  | 0.832013  | -2.636843 | -0.932926 |
| P  | 4.776003  | -2.311823 | 1.271023  |
| O  | 4.360906  | -2.407338 | -0.358634 |
| O  | 5.364787  | -0.919343 | 1.322071  |
| O  | 5.958041  | -3.453779 | 1.364526  |
| O  | 3.654508  | -2.795111 | 2.135803  |
| Na | 5.027138  | -0.124270 | -0.774153 |
| H  | 0.302103  | -2.934003 | 2.121280  |
| H  | -0.872038 | -4.886287 | 2.760179  |
| C  | 3.802275  | -3.601754 | -0.854057 |
| H  | 3.258843  | -3.374986 | -1.782827 |
| H  | 4.580148  | -4.350369 | -1.078274 |
| H  | 3.100472  | -4.044809 | -0.128320 |
| C  | 7.185478  | -3.212025 | 0.714776  |
| H  | 7.838024  | -4.076934 | 0.888276  |
| H  | 7.058465  | -3.091255 | -0.374886 |
| H  | 7.684432  | -2.310952 | 1.104123  |
| C  | -0.740744 | 2.201333  | 2.232343  |
| C  | -2.059957 | 2.589946  | 2.584407  |
| C  | 0.215282  | 1.989608  | 3.257924  |
| C  | -2.381061 | 2.817804  | 3.929683  |
| C  | -0.140077 | 2.211352  | 4.595930  |
| C  | -1.429263 | 2.633801  | 4.935637  |
| H  | 2.412940  | 3.083267  | 0.496975  |
| H  | 3.896714  | 4.837137  | 1.370795  |
| C  | 2.004017  | 4.060335  | 0.701235  |
| C  | 2.850906  | 5.055192  | 1.197184  |
| C  | 0.642166  | 4.329225  | 0.473120  |
| C  | 2.349731  | 6.329561  | 1.469733  |



|   |           |           |           |
|---|-----------|-----------|-----------|
| H | 3.006727  | 7.098897  | 1.854254  |
| C | 0.149574  | 5.618186  | 0.750809  |
| C | 1.000385  | 6.610878  | 1.245964  |
| H | -0.894480 | 5.856689  | 0.590223  |
| H | 0.612239  | 7.598657  | 1.458323  |
| C | -2.244069 | -1.072237 | 1.827329  |
| H | -2.207901 | -0.028051 | 2.161323  |
| C | -2.299424 | -1.996115 | 3.016598  |
| H | -1.443478 | -1.885782 | 3.701252  |
| H | -3.201975 | -1.795298 | 3.620902  |
| H | -2.364005 | -3.054321 | 2.729630  |
| B | -3.342510 | -1.214172 | 0.757125  |
| O | -3.583613 | -0.271680 | -0.227619 |
| O | -4.238886 | -2.255597 | 0.704972  |
| C | -5.052097 | -2.082420 | -0.482403 |
| C | -4.896496 | -0.552733 | -0.772879 |
| C | -4.442917 | -2.948691 | -1.569798 |
| H | -3.410885 | -2.638237 | -1.790181 |
| H | -4.408662 | -3.992046 | -1.229846 |
| H | -5.024881 | -2.910857 | -2.500774 |
| C | -6.465187 | -2.527150 | -0.175494 |
| H | -6.873919 | -2.014164 | 0.703324  |
| H | -7.131958 | -2.335190 | -1.028328 |
| H | -6.485188 | -3.606409 | 0.026188  |
| C | -5.888398 | 0.297530  | 0.003938  |
| H | -6.911730 | 0.178700  | -0.377113 |
| H | -5.887421 | 0.042092  | 1.072808  |
| H | -5.614032 | 1.356648  | -0.088925 |
| C | -4.919316 | -0.181447 | -2.238838 |
| H | -4.819177 | 0.905439  | -2.352964 |
| H | -4.108386 | -0.656243 | -2.804973 |
| H | -5.873367 | -0.474527 | -2.699652 |
| C | -3.168886 | 2.703721  | 1.571895  |
| H | -4.071962 | 2.174549  | 1.943727  |
| H | -3.419092 | 3.772732  | 1.409978  |
| H | -2.905512 | 2.235734  | 0.604284  |
| C | 1.625050  | 1.542181  | 2.977445  |
| H | 2.336341  | 2.329938  | 3.303323  |
| H | 1.837589  | 0.610658  | 3.543031  |
| H | 1.806640  | 1.331781  | 1.908053  |
| C | -1.806333 | 2.875689  | 6.367847  |
| H | -2.641320 | 2.201365  | 6.652605  |
| H | -0.952944 | 2.686921  | 7.053432  |
| H | -2.131881 | 3.929669  | 6.494601  |
| H | -3.386712 | 3.121383  | 4.198383  |
| H | 0.596724  | 2.057146  | 5.375990  |

123

Figure\_S9\_imid-2\_modeB.ed(AS) / electronic energy: -4442.818766626988 a.u. / lowest freq: 15.87 cm<sup>-1</sup>

|    |           |           |           |
|----|-----------|-----------|-----------|
| C  | -2.806732 | -1.062423 | 1.252922  |
| H  | -3.033964 | -1.950462 | 0.647844  |
| C  | -3.483191 | 0.230019  | 0.745422  |
| H  | -3.854965 | 0.833885  | 1.588009  |
| C  | -1.143815 | 0.426691  | 0.443566  |
| C  | -0.306380 | -1.583511 | 1.508230  |
| C  | 0.613377  | -1.053534 | 2.419964  |
| C  | -0.136405 | -2.909122 | 1.059989  |
| C  | 1.660540  | -1.823701 | 2.913446  |
| H  | 0.481344  | -0.022239 | 2.753718  |
| C  | 0.918642  | -3.673451 | 1.564610  |
| C  | 1.811342  | -3.142564 | 2.491932  |
| H  | 2.343286  | -1.376027 | 3.635673  |
| H  | 1.033019  | -4.695198 | 1.199079  |
| H  | 2.624970  | -3.760396 | 2.880105  |
| S  | -1.161368 | -3.679841 | -0.203736 |
| O  | -0.363602 | -4.834639 | -0.711269 |
| O  | -1.310548 | -2.645196 | -1.274836 |
| O  | -2.426177 | -4.076125 | 0.442568  |
| Cu | 0.674210  | 1.236406  | 0.207394  |
| C  | -3.129654 | -1.357072 | 2.697888  |
| C  | -3.879878 | -2.496369 | 3.038327  |
| C  | -2.688908 | -0.498936 | 3.723716  |
| C  | -4.172515 | -2.776571 | 4.376466  |
| H  | -4.245226 | -3.165198 | 2.269867  |
| C  | -2.982917 | -0.783806 | 5.059810  |
| H  | -2.113266 | 0.386624  | 3.489106  |
| C  | -3.722992 | -1.922418 | 5.386298  |
| H  | -4.749893 | -3.656093 | 4.630463  |
| H  | -2.636415 | -0.121305 | 5.842385  |
| H  | -3.950282 | -2.141614 | 6.421519  |
| N  | -1.365762 | -0.737717 | 1.083966  |
| N  | -2.346694 | 0.932579  | 0.114373  |
| C  | 2.148618  | 1.554165  | -1.216891 |
| C  | 2.021765  | 2.944489  | -1.663134 |
| C  | 2.880579  | 3.919564  | -1.117944 |
| C  | 1.062756  | 3.367364  | -2.601618 |
| C  | 2.765619  | 5.258711  | -1.476859 |
| C  | 0.944414  | 4.708292  | -2.955100 |
| C  | 1.790957  | 5.664283  | -2.390973 |

|    |           |           |           |
|----|-----------|-----------|-----------|
| H  | 3.441020  | 5.996454  | -1.035889 |
| H  | 0.186291  | 5.009801  | -3.682480 |
| H  | 1.695388  | 6.717018  | -2.667080 |
| C  | 1.342786  | 0.486781  | -1.624041 |
| C  | 1.747159  | -0.903595 | -1.308965 |
| H  | 2.228723  | -0.974720 | -0.319777 |
| H  | 0.886264  | -1.590572 | -1.322458 |
| H  | 0.405937  | 2.633894  | -3.071159 |
| H  | 0.615890  | 0.602870  | -2.432331 |
| P  | 2.376722  | -2.546836 | -3.259434 |
| O  | 2.245041  | -3.907319 | -2.390707 |
| O  | 1.108378  | -2.438050 | -4.033320 |
| O  | 3.749563  | -2.626970 | -4.074084 |
| O  | 2.774316  | -1.385661 | -2.253984 |
| Na | -0.354677 | -4.055973 | -2.990512 |
| H  | 3.061079  | 1.333219  | -0.653802 |
| H  | 3.628632  | 3.600650  | -0.386917 |
| C  | 3.226450  | -4.283126 | -1.427242 |
| H  | 2.834827  | -5.154879 | -0.893319 |
| H  | 4.173914  | -4.549786 | -1.916736 |
| H  | 3.408294  | -3.471104 | -0.707807 |
| C  | 3.845562  | -3.493762 | -5.204642 |
| H  | 4.837622  | -3.340722 | -5.639168 |
| H  | 3.743694  | -4.546571 | -4.904369 |
| H  | 3.079798  | -3.252413 | -5.953546 |
| C  | -2.461945 | 2.190556  | -0.531462 |
| C  | -2.698884 | 3.371505  | 0.217042  |
| C  | -2.366121 | 2.272362  | -1.943928 |
| C  | -2.805892 | 4.603274  | -0.445484 |
| C  | -2.487492 | 3.516332  | -2.578530 |
| C  | -2.689219 | 4.683320  | -1.835544 |
| H  | -3.554552 | -1.315314 | -1.553387 |
| H  | -5.440890 | -1.640739 | -3.092198 |
| C  | -4.490529 | -0.821109 | -1.343145 |
| C  | -5.561356 | -1.009691 | -2.221178 |
| C  | -4.631935 | -0.001265 | -0.208160 |
| C  | -6.785480 | -0.384289 | -1.977478 |
| H  | -7.613466 | -0.530736 | -2.658928 |
| C  | -5.872338 | 0.621688  | 0.026724  |
| C  | -6.940852 | 0.430233  | -0.854152 |
| H  | -6.013881 | 1.262510  | 0.888192  |
| H  | -7.889822 | 0.915587  | -0.666147 |
| C  | 1.441868  | 2.411402  | 1.718225  |
| H  | 1.623449  | 3.311544  | 1.104609  |
| C  | 0.533134  | 2.735539  | 2.892833  |
| H  | -0.231942 | 3.479707  | 2.630576  |
| H  | -0.013306 | 1.862553  | 3.291623  |
| H  | 1.071836  | 3.158262  | 3.762734  |
| B  | 2.785047  | 1.785635  | 2.077135  |
| O  | 3.045432  | 1.043216  | 3.233534  |
| O  | 3.957079  | 1.907517  | 1.320288  |
| C  | 4.933537  | 1.005380  | 1.870123  |
| C  | 4.478778  | 0.923804  | 3.358513  |
| C  | 4.784809  | -0.329184 | 1.150362  |
| H  | 3.799125  | -0.776962 | 1.354675  |
| H  | 4.871977  | -0.181227 | 0.063742  |
| H  | 5.556102  | -1.052206 | 1.452205  |
| C  | 6.317108  | 1.578311  | 1.656174  |
| H  | 6.397614  | 2.602449  | 2.041713  |
| H  | 7.080322  | 0.960915  | 2.152147  |
| H  | 6.555937  | 1.604613  | 0.584048  |
| C  | 4.959143  | 2.114602  | 4.176217  |
| H  | 6.038008  | 2.068636  | 4.380269  |
| H  | 4.746066  | 3.062477  | 3.661891  |
| H  | 4.433267  | 2.129997  | 5.140482  |
| C  | 4.842469  | -0.367550 | 4.059302  |
| H  | 4.434171  | -0.377762 | 5.079737  |
| H  | 4.466061  | -1.254044 | 3.534933  |
| H  | 5.935045  | -0.465905 | 4.138731  |
| C  | -2.882544 | 3.352135  | 1.710205  |
| H  | -2.501043 | 4.291212  | 2.164417  |
| H  | -3.963076 | 3.261785  | 1.946620  |
| H  | -2.334680 | 2.511237  | 2.177853  |
| C  | -2.188506 | 1.056028  | -2.813930 |
| H  | -1.850332 | 0.171180  | -2.241961 |
| H  | -3.150010 | 0.820388  | -3.315278 |
| H  | -1.430992 | 1.251303  | -3.600254 |
| C  | -2.788149 | 6.017909  | -2.514163 |
| H  | -2.679806 | 5.925894  | -3.615853 |
| H  | -3.775287 | 6.476409  | -2.294637 |
| H  | -1.984868 | 6.686281  | -2.138418 |
| H  | -2.985332 | 5.508206  | 0.123991  |
| H  | -2.415831 | 3.574025  | -3.658577 |

123

Figure\_S9\_imid-2\_modeB\_ts(AS)\_01 / electronic energy: -4442.804622855016 a.u. / lowest freq: -220.83 cm-1

|   |          |           |          |
|---|----------|-----------|----------|
| C | 2.993033 | 0.207844  | 1.306336 |
| H | 3.389600 | 1.136430  | 0.873487 |
| C | 3.399561 | -1.068640 | 0.530876 |

|    |           |           |           |
|----|-----------|-----------|-----------|
| H  | 3.698490  | -1.862273 | 1.229230  |
| C  | 1.065745  | -0.750314 | 0.318627  |
| C  | 0.631530  | 1.128390  | 1.768917  |
| C  | -0.383795 | 0.585367  | 2.564312  |
| C  | 0.703297  | 2.525704  | 1.607205  |
| C  | -1.305030 | 1.404527  | 3.206709  |
| H  | -0.432605 | -0.498808 | 2.689445  |
| C  | -0.228699 | 3.337061  | 2.258181  |
| C  | -1.226568 | 2.786979  | 3.058638  |
| H  | -2.071552 | 0.941720  | 3.828364  |
| H  | -0.166762 | 4.415616  | 2.104759  |
| H  | -1.943277 | 3.440309  | 3.561255  |
| S  | 1.886121  | 3.350023  | 0.527638  |
| O  | 1.317603  | 4.705845  | 0.285364  |
| O  | 1.886266  | 2.552614  | -0.738254 |
| O  | 3.176637  | 3.359124  | 1.240332  |
| Cu | -0.893756 | -1.013910 | -0.099504 |
| C  | 3.370931  | 0.141227  | 2.766412  |
| C  | 4.339072  | 1.016190  | 3.289591  |
| C  | 2.768743  | -0.800788 | 3.622801  |
| C  | 4.686584  | 0.958964  | 4.642625  |
| H  | 4.831984  | 1.737932  | 2.651446  |
| C  | 3.118683  | -0.853401 | 4.974658  |
| H  | 2.025656  | -1.490715 | 3.244307  |
| C  | 4.075673  | 0.026774  | 5.484762  |
| H  | 5.432110  | 1.636698  | 5.037986  |
| H  | 2.647790  | -1.577458 | 5.626873  |
| H  | 4.346249  | -0.015565 | 6.531843  |
| N  | 1.515934  | 0.212077  | 1.139843  |
| N  | 2.128323  | -1.441590 | -0.125717 |
| C  | -2.503378 | -0.692148 | -1.342666 |
| C  | -2.819939 | -1.866031 | -2.156856 |
| C  | -3.930689 | -2.663375 | -1.817764 |
| C  | -2.041080 | -2.257888 | -3.262211 |
| C  | -4.239206 | -3.807407 | -2.547502 |
| C  | -2.346471 | -3.405616 | -3.985645 |
| C  | -3.446424 | -4.189356 | -3.631141 |
| H  | -5.105781 | -4.410752 | -2.265880 |
| H  | -1.721365 | -3.689901 | -4.835585 |
| H  | -3.685132 | -5.091385 | -4.199349 |
| C  | -1.507605 | 0.263551  | -1.672386 |
| C  | -1.291817 | 1.407100  | -0.885413 |
| H  | -1.780367 | 1.482496  | 0.090633  |
| H  | -0.345852 | 1.943527  | -0.986727 |
| H  | -1.185640 | -1.654265 | -3.566603 |
| H  | -0.931120 | 0.173920  | -2.596325 |
| P  | -1.697051 | 3.792334  | -2.540610 |
| O  | -1.174756 | 5.137243  | -1.744660 |
| O  | -0.474919 | 3.340925  | -3.289849 |
| O  | -2.894819 | 4.339863  | -3.491165 |
| O  | -2.422963 | 2.865413  | -1.555730 |
| Na | 1.253656  | 4.448579  | -2.130237 |
| H  | -3.274481 | -0.402267 | -0.620950 |
| H  | -4.537307 | -2.372783 | -0.956816 |
| C  | -1.959942 | 5.704122  | -0.710685 |
| H  | -1.354898 | 6.471116  | -0.213425 |
| H  | -2.872264 | 6.171146  | -1.114392 |
| H  | -2.250636 | 4.942754  | 0.027710  |
| C  | -2.584444 | 5.296296  | -4.491070 |
| H  | -3.478785 | 5.432529  | -5.109005 |
| H  | -2.310858 | 6.266417  | -4.047257 |
| H  | -1.758025 | 4.955091  | -5.131899 |
| C  | 1.962680  | -2.550001 | -0.998350 |
| C  | 2.031347  | -3.879493 | -0.506850 |
| C  | 1.650639  | -2.332481 | -2.364997 |
| C  | 1.713122  | -4.949804 | -1.357449 |
| C  | 1.352118  | -3.423442 | -3.193453 |
| C  | 1.357069  | -4.727263 | -2.690169 |
| H  | 3.595624  | 0.791921  | -1.500881 |
| H  | 5.441194  | 1.098327  | -3.096327 |
| C  | 4.458049  | 0.146936  | -1.434213 |
| C  | 5.504229  | 0.322792  | -2.344009 |
| C  | 4.524369  | -0.859257 | -0.453956 |
| C  | 6.628873  | -0.502487 | -2.285672 |
| H  | 7.437898  | -0.365861 | -2.991506 |
| C  | 5.664166  | -1.683776 | -0.404808 |
| C  | 6.708714  | -1.504815 | -1.316701 |
| H  | 5.745628  | -2.469433 | 0.335957  |
| H  | 7.580395  | -2.144862 | -1.272404 |
| C  | -1.828260 | -2.459829 | 1.005806  |
| H  | -2.241710 | -3.070174 | 0.185175  |
| C  | -0.888653 | -3.274610 | 1.869359  |
| H  | -0.258367 | -3.945637 | 1.270461  |
| H  | -0.214290 | -2.659065 | 2.488526  |
| H  | -1.425823 | -3.926463 | 2.583877  |
| B  | -2.985879 | -1.773522 | 1.747041  |
| O  | -2.969278 | -1.402351 | 3.087280  |
| O  | -4.229326 | -1.512190 | 1.182867  |

|   |           |           |           |
|---|-----------|-----------|-----------|
| C | -5.003060 | -0.754405 | 2.137784  |
| C | -4.346711 | -1.188713 | 3.484436  |
| C | -4.787247 | 0.719316  | 1.829744  |
| H | -3.732551 | 1.004857  | 1.963668  |
| H | -5.061262 | 0.922817  | 0.785135  |
| H | -5.401322 | 1.369083  | 2.468913  |
| C | -6.463063 | -1.124864 | 1.998194  |
| H | -6.615195 | -2.209427 | 2.057640  |
| H | -7.065450 | -0.647414 | 2.784580  |
| H | -6.851975 | -0.783683 | 1.029007  |
| C | -4.874274 | -2.525675 | 3.983758  |
| H | -5.902886 | -2.446760 | 4.361331  |
| H | -4.857198 | -3.285404 | 3.189484  |
| H | -4.239687 | -2.884721 | 4.805202  |
| C | -4.422691 | -0.155932 | 4.586839  |
| H | -3.858898 | -0.494196 | 5.466965  |
| H | -4.027493 | 0.820694  | 4.282936  |
| H | -5.466603 | -0.006188 | 4.898321  |
| C | 2.463571  | -4.190860 | 0.901997  |
| H | 2.143910  | -5.209875 | 1.207619  |
| H | 3.570353  | -4.147842 | 0.965439  |
| H | 2.022692  | -3.474534 | 1.623181  |
| C | 1.718893  | -0.964593 | -2.991904 |
| H | 1.470878  | -0.161847 | -2.271560 |
| H | 2.740491  | -0.798686 | -3.389215 |
| H | 1.011431  | -0.880052 | -3.842176 |
| C | 1.004782  | -5.890561 | -3.570248 |
| H | 0.746142  | -5.561862 | -4.599388 |
| H | 1.866189  | -6.588653 | -3.629469 |
| H | 0.130557  | -6.427068 | -3.144908 |
| H | 1.748573  | -5.966911 | -0.984175 |
| H | 1.115587  | -3.254557 | -4.237658 |

123

Figure\_S9\_imid-2\_modeB\_ts(AS)\_02 / electronic energy: -4442.807730103428 a.u. / lowest freq: -251.09 cm-1

|    |           |           |           |
|----|-----------|-----------|-----------|
| C  | 1.684569  | 2.748898  | -0.547531 |
| H  | 2.633190  | 2.691893  | 0.002076  |
| C  | 0.502325  | 3.245922  | 0.311195  |
| H  | -0.071910 | 4.027078  | -0.210037 |
| C  | 0.093332  | 1.001876  | -0.320140 |
| C  | 1.957417  | 0.505059  | -1.780293 |
| C  | 1.229223  | -0.003754 | -2.863343 |
| C  | 3.297595  | 0.102850  | -1.607362 |
| C  | 1.792049  | -0.920226 | -3.746886 |
| H  | 0.202688  | 0.343212  | -3.000004 |
| C  | 3.855540  | -0.804403 | -2.511739 |
| C  | 3.113762  | -1.322398 | -3.570563 |
| H  | 1.199794  | -1.304773 | -4.580222 |
| H  | 4.888035  | -1.118737 | -2.350585 |
| H  | 3.571624  | -2.037315 | -4.257130 |
| S  | 4.335642  | 0.620652  | -0.227121 |
| O  | 5.482535  | -0.329149 | -0.211404 |
| O  | 3.480517  | 0.432440  | 0.985091  |
| O  | 4.722581  | 2.017600  | -0.493287 |
| Cu | -0.791982 | -0.762275 | -0.688675 |
| C  | 1.881997  | 3.584901  | -1.789525 |
| C  | 3.017140  | 4.404448  | -1.919129 |
| C  | 0.925583  | 3.576644  | -2.823244 |
| C  | 3.200356  | 5.183096  | -3.065850 |
| H  | 3.756224  | 4.451190  | -1.129988 |
| C  | 1.113630  | 4.355966  | -3.967843 |
| H  | 0.037847  | 2.963077  | -2.746120 |
| C  | 2.251062  | 5.157051  | -4.090230 |
| H  | 4.077539  | 5.810307  | -3.158505 |
| H  | 0.376275  | 4.339309  | -4.759967 |
| H  | 2.394769  | 5.760918  | -4.976852 |
| N  | 1.259610  | 1.366199  | -0.892974 |
| N  | -0.328436 | 2.027181  | 0.428202  |
| C  | -0.920248 | -2.794211 | -0.609261 |
| C  | -2.158263 | -3.478534 | -0.236820 |
| C  | -2.766716 | -4.354726 | -1.153593 |
| C  | -2.729588 | -3.362636 | 1.043682  |
| C  | -3.886697 | -5.101443 | -0.801441 |
| C  | -3.848662 | -4.110024 | 1.396113  |
| C  | -4.430546 | -4.987352 | 0.478301  |
| H  | -4.333675 | -5.783722 | -1.528489 |
| H  | -4.274488 | -4.004465 | 2.397383  |
| H  | -5.307121 | -5.575824 | 0.759466  |
| C  | 0.057117  | -2.352304 | 0.329335  |
| C  | 1.386592  | -2.119028 | -0.062798 |
| H  | 1.613102  | -2.114914 | -1.130720 |
| H  | 2.042751  | -1.507137 | 0.561056  |
| H  | -2.292801 | -2.676994 | 1.775455  |
| H  | -0.170911 | -2.339840 | 1.400001  |
| P  | 3.400122  | -3.775505 | 1.273369  |
| O  | 4.866052  | -3.402046 | 0.622661  |
| O  | 3.296074  | -2.841892 | 2.446352  |
| O  | 3.534986  | -5.341237 | 1.677653  |
| O  | 2.339920  | -3.786829 | 0.162423  |

|    |           |           |           |
|----|-----------|-----------|-----------|
| Na | 4.922696  | -1.255816 | 1.974773  |
| H  | -0.542600 | -3.047849 | -1.610811 |
| H  | -2.330253 | -4.466378 | -2.150173 |
| C  | 5.269618  | -3.977569 | -0.608013 |
| H  | 6.125811  | -3.403797 | -0.981327 |
| H  | 5.572226  | -5.027829 | -0.474166 |
| H  | 4.458879  | -3.937605 | -1.350272 |
| C  | 4.466387  | -5.705158 | 2.684213  |
| H  | 4.368673  | -6.783680 | 2.849563  |
| H  | 5.500483  | -5.488354 | 2.373448  |
| H  | 4.263583  | -5.178827 | 3.628373  |
| C  | -1.543054 | 2.007402  | 1.162392  |
| C  | -2.630127 | 2.822621  | 0.758242  |
| C  | -1.618876 | 1.318520  | 2.400790  |
| C  | -3.707781 | 3.027142  | 1.630035  |
| C  | -2.723053 | 1.521911  | 3.240756  |
| C  | -3.754414 | 2.392019  | 2.873225  |
| H  | 1.905761  | 1.974215  | 2.311725  |
| H  | 2.535732  | 2.861533  | 4.519100  |
| C  | 1.630011  | 2.984957  | 2.570196  |
| C  | 1.988034  | 3.485481  | 3.824785  |
| C  | 0.915414  | 3.783726  | 1.659916  |
| C  | 1.638063  | 4.788655  | 4.184282  |
| H  | 1.915368  | 5.175013  | 5.156492  |
| C  | 0.568687  | 5.095403  | 2.033206  |
| C  | 0.929430  | 5.592957  | 3.288991  |
| H  | 0.015321  | 5.733918  | 1.355912  |
| H  | 0.657518  | 6.602547  | 3.568699  |
| C  | -2.251442 | -0.366358 | -2.048252 |
| H  | -2.002276 | 0.689278  | -2.254493 |
| C  | -2.114700 | -1.232834 | -3.284873 |
| H  | -2.769242 | -0.893680 | -4.109717 |
| H  | -1.095241 | -1.271233 | -3.703390 |
| H  | -2.409233 | -2.273768 | -3.080967 |
| B  | -3.630306 | -0.461427 | -1.376457 |
| O  | -4.531419 | -1.473583 | -1.663872 |
| O  | -4.177549 | 0.469427  | -0.510669 |
| C  | -5.480655 | -0.006892 | -0.102353 |
| C  | -5.831671 | -1.027809 | -1.235217 |
| C  | -5.327292 | -0.673121 | 1.253358  |
| H  | -4.656660 | -1.540120 | 1.196027  |
| H  | -4.900659 | 0.036554  | 1.971303  |
| H  | -6.293301 | -1.010140 | 1.654534  |
| C  | -6.437965 | 1.162748  | -0.013936 |
| H  | -6.422194 | 1.774971  | -0.923483 |
| H  | -7.467223 | 0.809867  | 0.146237  |
| H  | -6.181194 | 1.812622  | 0.831241  |
| C  | -6.486071 | -0.361123 | -2.437447 |
| H  | -7.514304 | -0.038269 | -2.223706 |
| H  | -5.911914 | 0.516030  | -2.768596 |
| H  | -6.521879 | -1.073161 | -3.272882 |
| C  | -6.647320 | -2.218662 | -0.781865 |
| H  | -6.839849 | -2.890744 | -1.629891 |
| H  | -6.124945 | -2.799011 | -0.011792 |
| H  | -7.620355 | -1.900451 | -0.379624 |
| C  | -2.695376 | 3.463236  | -0.602355 |
| H  | -3.681778 | 3.253975  | -1.068020 |
| H  | -2.570585 | 4.561883  | -0.504675 |
| H  | -1.924695 | 3.064612  | -1.290512 |
| C  | -0.541135 | 0.386452  | 2.889018  |
| H  | 0.272852  | 0.234464  | 2.157322  |
| H  | -0.097589 | 0.789720  | 3.823570  |
| H  | -0.985167 | -0.607624 | 3.106176  |
| C  | -4.922479 | 2.627088  | 3.785683  |
| H  | -4.822064 | 2.056960  | 4.733649  |
| H  | -4.991376 | 3.707584  | 4.031678  |
| H  | -5.860195 | 2.308878  | 3.284140  |
| H  | -4.524089 | 3.675322  | 1.331960  |
| H  | -2.769636 | 1.008286  | 4.194222  |

123

Figure\_S9\_imid-2\_modeB\_ts(AS)\_03 / electronic energy: -4442.809989169532 a.u. / lowest freq: -267.59 cm-1

|   |           |           |           |
|---|-----------|-----------|-----------|
| C | -2.590260 | -2.028577 | -0.469909 |
| H | -3.487016 | -1.576242 | -0.027067 |
| C | -1.671974 | -2.721256 | 0.558643  |
| H | -1.381694 | -3.730040 | 0.225987  |
| C | -0.509834 | -0.885565 | -0.382951 |
| C | -2.074414 | -0.068512 | -2.049828 |
| C | -1.192197 | -0.009074 | -3.136639 |
| C | -3.224319 | 0.747467  | -2.059818 |
| C | -1.418090 | 0.851871  | -4.206437 |
| H | -0.321282 | -0.667756 | -3.128891 |
| C | -3.450615 | 1.589120  | -3.151673 |
| C | -2.557732 | 1.651934  | -4.217541 |
| H | -0.711230 | 0.879640  | -5.038697 |
| H | -4.337696 | 2.223380  | -3.132882 |
| H | -2.754302 | 2.326792  | -5.052885 |
| S | -4.411004 | 0.861604  | -0.704167 |
| O | -5.212985 | 2.087202  | -0.991992 |

|    |           |           |           |
|----|-----------|-----------|-----------|
| O  | -3.596002 | 1.048411  | 0.532578  |
| O  | -5.208986 | -0.377546 | -0.734229 |
| Cu | 0.909805  | 0.425002  | -0.939455 |
| C  | -3.012010 | -2.959012 | -1.582425 |
| C  | -4.346018 | -3.394448 | -1.672293 |
| C  | -2.078478 | -3.423496 | -2.528921 |
| C  | -4.740307 | -4.260393 | -2.696696 |
| H  | -5.080536 | -3.073997 | -0.944781 |
| C  | -2.477588 | -4.288155 | -3.551631 |
| H  | -1.044466 | -3.110345 | -2.481181 |
| C  | -3.807760 | -4.705017 | -3.636747 |
| H  | -5.769348 | -4.589887 | -2.759441 |
| H  | -1.754651 | -4.635416 | -4.278404 |
| H  | -4.115128 | -5.375480 | -4.428836 |
| N  | -1.719889 | -0.935292 | -0.981284 |
| N  | -0.479394 | -1.845871 | 0.547786  |
| C  | 1.590802  | 2.361172  | -1.078181 |
| C  | 2.986651  | 2.726083  | -0.840180 |
| C  | 3.752892  | 3.257359  | -1.893435 |
| C  | 3.585228  | 2.638407  | 0.430658  |
| C  | 5.057627  | 3.694051  | -1.685957 |
| C  | 4.887241  | 3.078913  | 0.638968  |
| C  | 5.630653  | 3.612149  | -0.416678 |
| H  | 5.628816  | 4.110152  | -2.519269 |
| H  | 5.330845  | 3.000290  | 1.635233  |
| H  | 6.653876  | 3.957030  | -0.249925 |
| C  | 0.600537  | 2.268167  | -0.063686 |
| C  | -0.773684 | 2.280009  | -0.364161 |
| H  | -1.061202 | 2.323924  | -1.416719 |
| H  | -1.507137 | 1.819843  | 0.297507  |
| H  | 3.021751  | 2.219738  | 1.269241  |
| H  | 0.890219  | 2.262700  | 0.991478  |
| P  | -1.831419 | 4.433517  | 1.405239  |
| O  | -1.063901 | 5.817086  | 1.794296  |
| O  | -3.270107 | 4.595404  | 1.804774  |
| O  | -1.076045 | 3.308093  | 2.324385  |
| O  | -1.463439 | 4.063205  | -0.040914 |
| Na | -4.855802 | 3.272970  | 0.966824  |
| H  | 1.228006  | 2.584208  | -2.092775 |
| H  | 3.300685  | 3.347390  | -2.885189 |
| C  | 0.326702  | 5.907684  | 1.533540  |
| H  | 0.625146  | 6.953440  | 1.669657  |
| H  | 0.907379  | 5.279993  | 2.229006  |
| H  | 0.563391  | 5.597839  | 0.503741  |
| C  | -1.331258 | 3.299046  | 3.716686  |
| H  | -0.627135 | 2.599324  | 4.181179  |
| H  | -1.180932 | 4.294694  | 4.163434  |
| H  | -2.357013 | 2.968252  | 3.937153  |
| C  | 0.658951  | -2.119886 | 1.350082  |
| C  | 1.430407  | -3.285068 | 1.112781  |
| C  | 0.920445  | -1.342098 | 2.507349  |
| C  | 2.363603  | -3.708200 | 2.068632  |
| C  | 1.875172  | -1.779163 | 3.436312  |
| C  | 2.580879  | -2.969515 | 3.234311  |
| H  | -2.669733 | -0.715288 | 2.164178  |
| H  | -3.620851 | -0.916970 | 4.424211  |
| C  | -2.735974 | -1.690856 | 2.621073  |
| C  | -3.275629 | -1.801751 | 3.905152  |
| C  | -2.279606 | -2.831725 | 1.936569  |
| C  | -3.367563 | -3.052111 | 4.519901  |
| H  | -3.785190 | -3.136739 | 5.514779  |
| C  | -2.378018 | -4.086197 | 2.566165  |
| C  | -2.919648 | -4.193268 | 3.850697  |
| H  | -2.031391 | -4.982665 | 2.067366  |
| H  | -2.990109 | -5.161919 | 4.328374  |
| C  | 2.197403  | -0.569532 | -2.150236 |
| H  | 1.648560  | -1.522835 | -2.244686 |
| C  | 2.379638  | 0.119377  | -3.487911 |
| H  | 2.953682  | -0.497262 | -4.205132 |
| H  | 1.436212  | 0.377272  | -3.996896 |
| H  | 2.945764  | 1.057728  | -3.383388 |
| B  | 3.502307  | -0.786727 | -1.372222 |
| O  | 4.683206  | -0.129345 | -1.678358 |
| O  | 3.690445  | -1.713098 | -0.358701 |
| C  | 5.046845  | -1.580780 | 0.121276  |
| C  | 5.758075  | -0.883741 | -1.084229 |
| C  | 5.018389  | -0.703669 | 1.361323  |
| H  | 4.645322  | 0.302438  | 1.127215  |
| H  | 4.354634  | -1.143266 | 2.114556  |
| H  | 6.014910  | -0.604089 | 1.814005  |
| C  | 5.597649  | -2.951631 | 0.452010  |
| H  | 5.457658  | -3.658245 | -0.374678 |
| H  | 6.672138  | -2.895286 | 0.679551  |
| H  | 5.099217  | -3.368984 | 1.335151  |
| C  | 6.230822  | -1.878213 | -2.135811 |
| H  | 7.092595  | -2.467490 | -1.792663 |
| H  | 5.427661  | -2.574766 | -2.415588 |
| H  | 6.532252  | -1.334015 | -3.041082 |

|   |           |           |           |
|---|-----------|-----------|-----------|
| C | 6.881263  | 0.053298  | -0.700366 |
| H | 7.308764  | 0.519426  | -1.599070 |
| H | 6.532052  | 0.858619  | -0.043734 |
| H | 7.688854  | -0.489652 | -0.187912 |
| C | 1.303871  | -4.091323 | -0.151599 |
| H | 2.310933  | -4.269441 | -0.584500 |
| H | 0.831946  | -5.070128 | 0.075099  |
| H | 0.708698  | -3.567494 | -0.923962 |
| C | 0.189009  | -0.063503 | 2.816041  |
| H | -0.500975 | 0.246897  | 2.011096  |
| H | -0.396396 | -0.186211 | 3.751305  |
| H | 0.924270  | 0.755225  | 2.962663  |
| C | 3.584303  | -3.447421 | 4.242779  |
| H | 3.646642  | -2.761522 | 5.114238  |
| H | 3.293463  | -4.454360 | 4.609162  |
| H | 4.588363  | -3.508287 | 3.773722  |
| H | 2.932353  | -4.615480 | 1.899049  |
| H | 2.058652  | -1.192067 | 4.328920  |

123

Figure\_S9\_imid-2\_modeB ts(AS)\_04 / electronic energy: -4442.805082698800 a.u. / lowest freq: -234.02 cm-1

|    |           |           |           |
|----|-----------|-----------|-----------|
| C  | -0.052561 | -2.741591 | 0.279920  |
| H  | -1.069708 | -2.935019 | 0.637952  |
| C  | 0.971310  | -2.498741 | 1.409343  |
| H  | 1.918796  | -3.017745 | 1.197011  |
| C  | 0.615104  | -0.466451 | 0.262560  |
| C  | -0.796414 | -1.069861 | -1.585130 |
| C  | -0.118538 | -0.241874 | -2.494968 |
| C  | -2.125833 | -1.441576 | -1.877761 |
| C  | -0.728829 | 0.237108  | -3.647305 |
| H  | 0.922577  | 0.017430  | -2.295359 |
| C  | -2.719412 | -0.970289 | -3.053645 |
| C  | -2.041328 | -0.131624 | -3.933641 |
| H  | -0.160517 | 0.882802  | -4.321423 |
| H  | -3.752016 | -1.260417 | -3.253676 |
| H  | -2.538045 | 0.225691  | -4.838008 |
| S  | -3.176962 | -2.426848 | -0.794106 |
| O  | -4.563865 | -2.251337 | -1.307419 |
| O  | -3.038072 | -1.785134 | 0.552972  |
| O  | -2.681265 | -3.811264 | -0.866760 |
| Cu | 0.551828  | 1.484573  | -0.235646 |
| C  | 0.356238  | -3.906130 | -0.592405 |
| C  | 0.152843  | -5.211355 | -0.108792 |
| C  | 0.974705  | -3.737574 | -1.845623 |
| C  | 0.537869  | -6.319506 | -0.868573 |
| H  | -0.306424 | -5.369262 | 0.859509  |
| C  | 1.358870  | -4.848045 | -2.602353 |
| H  | 1.172316  | -2.756880 | -2.241703 |
| C  | 1.138577  | -6.138066 | -2.115831 |
| H  | 0.372529  | -7.319327 | -0.488576 |
| H  | 1.832563  | -4.707194 | -3.565408 |
| H  | 1.437833  | -6.996647 | -2.702911 |
| N  | -0.071289 | -1.418987 | -0.411726 |
| N  | 1.178944  | -1.041381 | 1.329904  |
| C  | -0.483991 | 3.251794  | -0.396650 |
| C  | 0.130419  | 4.426975  | 0.212543  |
| C  | 0.802097  | 5.356800  | -0.604073 |
| C  | 0.101412  | 4.670868  | 1.598900  |
| C  | 1.442110  | 6.464225  | -0.057956 |
| C  | 0.737873  | 5.780898  | 2.144294  |
| C  | 1.419904  | 6.678664  | 1.321135  |
| H  | 1.959366  | 7.168941  | -0.713407 |
| H  | 0.701238  | 5.946857  | 3.223552  |
| H  | 1.922529  | 7.547473  | 1.752298  |
| C  | -1.316050 | 2.319234  | 0.281125  |
| C  | -2.184386 | 1.462961  | -0.414201 |
| H  | -2.072259 | 1.371639  | -1.495659 |
| H  | -2.610520 | 0.596227  | 0.097711  |
| H  | -0.434070 | 3.988207  | 2.261466  |
| H  | -1.424122 | 2.370185  | 1.368448  |
| P  | -5.067033 | 1.839119  | 0.082638  |
| O  | -5.847667 | 0.768767  | -0.901256 |
| O  | -4.914494 | 1.072881  | 1.365408  |
| O  | -6.085900 | 3.100076  | 0.178197  |
| O  | -3.857871 | 2.423819  | -0.659728 |
| Na | -5.375490 | -1.117195 | 0.675214  |
| H  | -0.603087 | 3.304867  | -1.487825 |
| H  | 0.815068  | 5.199768  | -1.686336 |
| C  | -6.048169 | 1.076083  | -2.269583 |
| H  | -6.399301 | 0.165936  | -2.769717 |
| H  | -6.805330 | 1.866231  | -2.393095 |
| H  | -5.112801 | 1.409194  | -2.743385 |
| C  | -7.331301 | 2.918474  | 0.832183  |
| H  | -7.815031 | 3.899075  | 0.901281  |
| H  | -7.988647 | 2.240831  | 0.264977  |
| H  | -7.197306 | 2.514322  | 1.846247  |
| C  | 2.107778  | -0.350507 | 2.150932  |
| C  | 3.500294  | -0.587101 | 2.017909  |
| C  | 1.648949  | 0.529250  | 3.163481  |

|   |           |           |           |
|---|-----------|-----------|-----------|
| C | 4.396623  | 0.017580  | 2.910960  |
| C | 2.570370  | 1.131712  | 4.031711  |
| C | 3.940250  | 0.877196  | 3.913112  |
| H | -1.337401 | -1.751091 | 2.726299  |
| H | -2.083936 | -2.435796 | 4.968444  |
| C | -0.724636 | -2.432805 | 3.299268  |
| C | -1.153183 | -2.820079 | 4.571751  |
| C | 0.484776  | -2.924063 | 2.773228  |
| C | -0.382031 | -3.701594 | 5.332188  |
| H | -0.715118 | -4.000305 | 6.317678  |
| C | 1.252220  | -3.812405 | 3.548529  |
| C | 0.819032  | -4.197823 | 4.820603  |
| H | 2.188899  | -4.204901 | 3.172633  |
| H | 1.416376  | -4.880569 | 5.410926  |
| C | 2.325468  | 2.344217  | -0.803242 |
| H | 1.952753  | 3.192220  | -1.400062 |
| C | 3.019384  | 2.826062  | 0.453263  |
| H | 3.820140  | 3.557765  | 0.235998  |
| H | 2.350596  | 3.327044  | 1.173954  |
| H | 3.515085  | 2.005153  | 0.990325  |
| B | 3.158902  | 1.440831  | -1.721835 |
| O | 4.356498  | 0.848239  | -1.360892 |
| O | 2.858896  | 1.194892  | -3.054992 |
| C | 3.833767  | 0.253835  | -3.563027 |
| C | 5.030127  | 0.458665  | -2.578131 |
| C | 3.233626  | -1.135636 | -3.449802 |
| H | 3.040530  | -1.386608 | -2.396975 |
| H | 2.281654  | -1.177266 | -3.996391 |
| H | 3.895475  | -1.905629 | -3.869038 |
| C | 4.134477  | 0.590221  | -5.007042 |
| H | 4.430634  | 1.639101  | -5.129270 |
| H | 4.942914  | -0.044599 | -5.397710 |
| H | 3.246170  | 0.417681  | -5.630323 |
| C | 5.924833  | 1.620669  | -2.982395 |
| H | 6.528109  | 1.385387  | -3.870036 |
| H | 5.336280  | 2.523959  | -3.196699 |
| H | 6.612898  | 1.855620  | -2.159364 |
| C | 5.860123  | -0.780792 | -2.325398 |
| H | 6.661791  | -0.560376 | -1.607648 |
| H | 5.262535  | -1.604775 | -1.917828 |
| H | 6.332315  | -1.129356 | -3.255360 |
| C | 4.070004  | -1.450751 | 0.925488  |
| H | 5.016120  | -1.011091 | 0.546894  |
| H | 4.289614  | -2.461760 | 1.327084  |
| H | 3.379361  | -1.532966 | 0.061928  |
| C | 0.190958  | 0.832189  | 3.376918  |
| H | -0.456312 | 0.422082  | 2.580039  |
| H | -0.135668 | 0.409671  | 4.350154  |
| H | 0.040644  | 1.930434  | 3.399715  |
| C | 4.925243  | 1.522564  | 4.843053  |
| H | 4.420047  | 2.178468  | 5.583637  |
| H | 5.487050  | 0.738813  | 5.393533  |
| H | 5.640498  | 2.138914  | 4.258635  |
| H | 5.460350  | -0.169374 | 2.815745  |
| H | 2.214217  | 1.799142  | 4.808108  |

123

Figure\_S9\_imid-2\_modeB\_ts(AS)\_05 / electronic energy: -4442.808593485546 a.u. / lowest freq: -188.35 cm<sup>-1</sup>

|    |           |           |           |
|----|-----------|-----------|-----------|
| C  | -0.708499 | -2.612285 | 0.661535  |
| H  | -1.802386 | -2.673346 | 0.637141  |
| C  | -0.139689 | -2.103872 | 2.005712  |
| H  | 0.663328  | -2.758986 | 2.378708  |
| C  | 0.348873  | -0.513851 | 0.324418  |
| C  | -0.488629 | -1.523418 | -1.694197 |
| C  | 0.592751  | -1.055258 | -2.458038 |
| C  | -1.676609 | -1.883607 | -2.364341 |
| C  | 0.511388  | -0.915231 | -3.837799 |
| H  | 1.528713  | -0.809538 | -1.953869 |
| C  | -1.734948 | -1.760549 | -3.756600 |
| C  | -0.661123 | -1.275660 | -4.496964 |
| H  | 1.380371  | -0.540234 | -4.383993 |
| H  | -2.669226 | -2.030914 | -4.250227 |
| H  | -0.744721 | -1.183655 | -5.581486 |
| S  | -3.196122 | -2.422222 | -1.556038 |
| O  | -4.253544 | -2.330247 | -2.605009 |
| O  | -3.447550 | -1.421112 | -0.472865 |
| O  | -2.954832 | -3.794640 | -1.079342 |
| Cu | 0.788169  | 1.221856  | -0.603604 |
| C  | -0.156791 | -3.971770 | 0.302545  |
| C  | -0.791258 | -5.121112 | 0.805945  |
| C  | 1.014157  | -4.123278 | -0.462829 |
| C  | -0.286444 | -6.393019 | 0.519986  |
| H  | -1.678279 | -5.030716 | 1.420921  |
| C  | 1.516709  | -5.395935 | -0.746366 |
| H  | 1.545081  | -3.262591 | -0.834363 |
| C  | 0.864888  | -6.530571 | -0.258621 |
| H  | -0.785829 | -7.272113 | 0.906236  |
| H  | 2.415749  | -5.501448 | -1.339901 |
| H  | 1.256032  | -7.515682 | -0.477544 |



|    |           |           |           |
|----|-----------|-----------|-----------|
| N  | -0.296607 | -1.534206 | -0.285036 |
| N  | 0.428108  | -0.795088 | 1.629875  |
| C  | 0.033281  | 2.972543  | -1.416525 |
| C  | 0.581970  | 4.221616  | -0.895421 |
| C  | 1.596276  | 4.897203  | -1.600389 |
| C  | 0.138427  | 4.784126  | 0.316987  |
| C  | 2.164187  | 6.064714  | -1.099114 |
| C  | 0.702219  | 5.953562  | 0.814800  |
| C  | 1.726134  | 6.595133  | 0.115500  |
| H  | 2.953188  | 6.568044  | -1.662894 |
| H  | 0.337986  | 6.369917  | 1.757009  |
| H  | 2.172018  | 7.511237  | 0.509505  |
| C  | -1.018759 | 2.250225  | -0.797237 |
| C  | -1.738604 | 1.234085  | -1.438027 |
| H  | -1.466992 | 0.960633  | -2.460633 |
| H  | -2.261009 | 0.471650  | -0.858314 |
| H  | -0.672571 | 4.309700  | 0.872868  |
| H  | -1.353391 | 2.530521  | 0.204629  |
| P  | -4.557510 | 2.182090  | -0.968830 |
| O  | -5.041484 | 3.739734  | -0.968798 |
| O  | -5.799521 | 1.337202  | -0.993893 |
| O  | -3.759412 | 2.039437  | 0.456130  |
| O  | -3.474071 | 2.001052  | -2.040815 |
| Na | -5.709939 | -0.802367 | -1.593444 |
| H  | 0.214090  | 2.781308  | -2.483454 |
| H  | 1.938260  | 4.493220  | -2.557495 |
| C  | -4.050167 | 4.745723  | -0.860058 |
| H  | -4.484556 | 5.689578  | -1.209782 |
| H  | -3.723779 | 4.873775  | 0.184643  |
| H  | -3.167402 | 4.511680  | -1.476458 |
| C  | -4.508218 | 1.962894  | 1.653004  |
| H  | -3.798131 | 1.944584  | 2.488406  |
| H  | -5.171328 | 2.834075  | 1.776815  |
| H  | -5.121484 | 1.050178  | 1.688544  |
| C  | 1.291607  | -0.072722 | 2.492009  |
| C  | 2.605328  | -0.542801 | 2.747532  |
| C  | 0.825758  | 1.083391  | 3.165168  |
| C  | 3.406610  | 0.114696  | 3.691570  |
| C  | 1.654157  | 1.728269  | 4.094455  |
| C  | 2.939871  | 1.247475  | 4.363751  |
| H  | -2.515711 | -0.702188 | 1.929039  |
| H  | -4.188961 | -0.468705 | 3.719658  |
| C  | -2.347060 | -1.196826 | 2.875736  |
| C  | -3.298903 | -1.060091 | 3.889644  |
| C  | -1.184313 | -1.962154 | 3.086291  |
| C  | -3.102654 | -1.684726 | 5.122928  |
| H  | -3.840283 | -1.576969 | 5.907559  |
| C  | -0.999495 | -2.588688 | 4.332322  |
| C  | -1.954523 | -2.448702 | 5.343700  |
| H  | -0.114456 | -3.181948 | 4.525686  |
| H  | -1.803299 | -2.932098 | 6.300206  |
| C  | 2.736846  | 1.818273  | -0.742624 |
| H  | 2.649519  | 2.528104  | -1.582187 |
| C  | 3.095221  | 2.539587  | 0.539715  |
| H  | 4.022498  | 3.135173  | 0.443498  |
| H  | 2.322837  | 3.248221  | 0.885806  |
| H  | 3.283707  | 1.840004  | 1.366620  |
| B  | 3.690612  | 0.698563  | -1.181794 |
| O  | 4.728124  | 0.196642  | -0.415210 |
| O  | 3.686294  | 0.134518  | -2.451269 |
| C  | 4.690943  | -0.906795 | -2.479220 |
| C  | 5.639382  | -0.474150 | -1.314537 |
| C  | 3.999871  | -2.226521 | -2.186629 |
| H  | 3.572945  | -2.219737 | -1.174478 |
| H  | 3.186754  | -2.395714 | -2.905283 |
| H  | 4.692750  | -3.076162 | -2.257175 |
| C  | 5.334045  | -0.931075 | -3.848368 |
| H  | 5.714400  | 0.055813  | -4.138808 |
| H  | 6.169571  | -1.645537 | -3.877517 |
| H  | 4.602335  | -1.244877 | -4.605710 |
| C  | 6.666070  | 0.558756  | -1.754791 |
| H  | 7.439717  | 0.120657  | -2.400326 |
| H  | 6.192129  | 1.387098  | -2.300439 |
| H  | 7.162677  | 0.980765  | -0.870816 |
| C  | 6.320054  | -1.614462 | -0.589679 |
| H  | 6.940043  | -1.224491 | 0.228777  |
| H  | 5.604036  | -2.323612 | -0.158375 |
| H  | 6.980504  | -2.169432 | -1.271589 |
| C  | 3.196735  | -1.725469 | 2.027700  |
| H  | 4.214944  | -1.472349 | 1.669317  |
| H  | 3.269951  | -2.586032 | 2.724795  |
| H  | 2.603580  | -2.025304 | 1.142519  |
| C  | -0.547089 | 1.652895  | 2.938631  |
| H  | -1.075941 | 1.163804  | 2.101129  |
| H  | -1.154892 | 1.534669  | 3.860027  |
| H  | -0.466638 | 2.733108  | 2.700005  |
| C  | 3.827062  | 1.939992  | 5.356046  |
| H  | 3.325671  | 2.822432  | 5.807500  |

|   |          |           |          |
|---|----------|-----------|----------|
| H | 4.097562 | 1.234970  | 6.170077 |
| H | 4.754123 | 2.283543  | 4.850509 |
| H | 4.407867 | -0.249051 | 3.893500 |
| H | 1.291517 | 2.609538  | 4.611070 |

123

Figure\_S9\_imid-2\_modeB\_prod(AS) / electronic energy: -4442.815393661368 a.u. / lowest freq: 16.03 cm-1

|    |           |           |           |
|----|-----------|-----------|-----------|
| C  | -3.016431 | -1.141563 | 0.783650  |
| H  | -3.162187 | -2.001878 | 0.119318  |
| C  | -3.726522 | 0.143352  | 0.303870  |
| H  | -4.324420 | 0.594548  | 1.109366  |
| C  | -1.388333 | 0.485963  | 0.235193  |
| C  | -0.506375 | -1.545302 | 1.214579  |
| C  | 0.379128  | -0.906650 | 2.093461  |
| C  | -0.299949 | -2.904134 | 0.905019  |
| C  | 1.441670  | -1.590407 | 2.670367  |
| H  | 0.203961  | 0.139207  | 2.356387  |
| C  | 0.767479  | -3.579524 | 1.504114  |
| C  | 1.633138  | -2.938280 | 2.383928  |
| H  | 2.095298  | -1.054186 | 3.358255  |
| H  | 0.917030  | -4.628166 | 1.243503  |
| H  | 2.458173  | -3.492078 | 2.837556  |
| S  | -1.278835 | -3.842608 | -0.288352 |
| O  | -0.422337 | -5.014859 | -0.634552 |
| O  | -1.435362 | -2.929298 | -1.455608 |
| O  | -2.537889 | -4.211425 | 0.382414  |
| Cu | 0.472476  | 1.122661  | -0.224173 |
| C  | -3.432486 | -1.537750 | 2.180995  |
| C  | -4.366571 | -2.572892 | 2.363382  |
| C  | -2.941384 | -0.857652 | 3.312097  |
| C  | -4.776608 | -2.939226 | 3.648633  |
| H  | -4.784682 | -3.092200 | 1.510314  |
| C  | -3.353311 | -1.228045 | 4.595154  |
| H  | -2.233945 | -0.047655 | 3.206037  |
| C  | -4.268025 | -2.269700 | 4.763780  |
| H  | -5.492764 | -3.740089 | 3.779601  |
| H  | -2.963952 | -0.705565 | 5.459353  |
| H  | -4.586835 | -2.554467 | 5.758091  |
| N  | -1.579287 | -0.756518 | 0.711052  |
| N  | -2.587063 | 1.026275  | -0.029850 |
| C  | 2.216149  | 1.250888  | -1.422709 |
| C  | 2.807984  | 2.524496  | -1.820434 |
| C  | 4.183942  | 2.746446  | -1.639859 |
| C  | 2.039492  | 3.540816  | -2.419512 |
| C  | 4.774463  | 3.932854  | -2.063716 |
| C  | 2.628451  | 4.729360  | -2.835435 |
| C  | 4.000495  | 4.928129  | -2.662126 |
| H  | 5.847648  | 4.083592  | -1.924648 |
| H  | 2.014468  | 5.509453  | -3.291217 |
| H  | 4.463816  | 5.862174  | -2.988290 |
| C  | 1.172955  | 0.637003  | -2.172139 |
| C  | 0.561273  | -0.507842 | -1.707265 |
| H  | 1.064571  | -1.097643 | -0.932411 |
| H  | -0.307476 | -0.963147 | -2.182492 |
| H  | 0.959935  | 3.405164  | -2.535835 |
| H  | 0.755177  | 1.168382  | -3.034293 |
| P  | 3.074807  | -2.733829 | -1.965473 |
| O  | 2.857174  | -4.278515 | -1.376402 |
| O  | 1.948906  | -2.635858 | -2.976130 |
| O  | 4.525458  | -2.862118 | -2.731154 |
| O  | 3.280478  | -1.757477 | -0.845068 |
| Na | 0.537302  | -4.351886 | -2.618505 |
| H  | 2.834057  | 0.570834  | -0.817902 |
| H  | 4.784124  | 1.968453  | -1.165029 |
| C  | 3.720526  | -4.746380 | -0.363836 |
| H  | 3.237754  | -5.927763 | 0.142515  |
| H  | 4.681891  | -5.090560 | -0.780508 |
| H  | 3.926733  | -3.958878 | 0.377753  |
| C  | 4.623507  | -3.693289 | -3.865884 |
| H  | 5.652987  | -3.635058 | -4.241295 |
| H  | 4.404483  | -4.747046 | -3.622965 |
| H  | 3.938710  | -3.375694 | -4.667618 |
| C  | -2.768543 | 2.395888  | -0.365062 |
| C  | -3.246583 | 3.316875  | 0.606086  |
| C  | -2.589166 | 2.837925  | -1.701332 |
| C  | -3.540239 | 4.635388  | 0.231300  |
| C  | -2.880965 | 4.166478  | -2.042226 |
| C  | -3.356261 | 5.065913  | -1.083920 |
| H  | -3.115395 | -1.003651 | -2.130026 |
| H  | -4.596285 | -1.306552 | -4.071827 |
| C  | -4.141865 | -0.671858 | -2.065737 |
| C  | -4.979526 | -0.845763 | -3.170641 |
| C  | -4.626769 | -0.071242 | -0.889074 |
| C  | -6.309500 | -0.424089 | -3.114075 |
| H  | -6.956900 | -0.558586 | -3.970900 |
| C  | -5.969237 | 0.348001  | -0.844022 |
| C  | -6.803897 | 0.171549  | -1.951636 |
| H  | -6.371306 | 0.817241  | 0.045206  |
| H  | -7.834651 | 0.498937  | -1.909023 |

|   |           |           |           |
|---|-----------|-----------|-----------|
| C | 1.134883  | 2.561222  | 1.037148  |
| H | 1.429844  | 3.325623  | 0.298704  |
| C | 0.055683  | 3.081411  | 1.956733  |
| H | -0.721397 | 3.637972  | 1.418153  |
| H | -0.436744 | 2.292946  | 2.547372  |
| H | 0.469188  | 3.788265  | 2.699212  |
| B | 2.401832  | 2.037341  | 1.754742  |
| O | 2.413964  | 1.539745  | 3.047233  |
| O | 3.671062  | 2.126302  | 1.230270  |
| C | 4.578792  | 1.480623  | 2.154458  |
| C | 3.793633  | 1.598644  | 3.499609  |
| C | 4.744219  | 0.044027  | 1.692431  |
| H | 3.791171  | -0.503179 | 1.723489  |
| H | 5.088615  | 0.022897  | 0.649916  |
| H | 5.479716  | -0.499471 | 2.302155  |
| C | 5.901719  | 2.214712  | 2.132483  |
| H | 5.774317  | 3.291817  | 2.295960  |
| H | 6.579034  | 1.824884  | 2.906081  |
| H | 6.397348  | 2.079672  | 1.161193  |
| C | 3.975894  | 2.954599  | 4.164209  |
| H | 4.982880  | 3.070395  | 4.587472  |
| H | 3.806677  | 3.775344  | 3.452515  |
| H | 3.250913  | 3.063060  | 4.982084  |
| C | 4.064302  | 0.489247  | 4.490081  |
| H | 3.412972  | 0.594047  | 5.368393  |
| H | 3.904498  | -0.507364 | 4.062124  |
| H | 5.105684  | 0.534747  | 4.839812  |
| C | -3.426404 | 2.952362  | 2.056278  |
| H | -2.977476 | 3.736450  | 2.702415  |
| H | -4.508708 | 2.874056  | 2.289749  |
| H | -2.925239 | 2.001894  | 2.314345  |
| C | -2.139315 | 1.925781  | -2.807601 |
| H | -1.815078 | 0.938292  | -2.438555 |
| H | -2.972077 | 1.778276  | -3.526821 |
| H | -1.284709 | 2.385947  | -3.345125 |
| C | -3.671571 | 6.486307  | -1.451567 |
| H | -3.477331 | 6.683704  | -2.527299 |
| H | -4.741867 | 6.696493  | -1.243583 |
| H | -3.042974 | 7.175519  | -0.849193 |
| H | -3.905582 | 5.336696  | 0.93274   |
| H | -2.746543 | 4.496640  | -3.066050 |

123

Figure\_S9\_imid-2\_modeC\_ed(AS) / electronic energy: -4442.825163621003 a.u. / lowest freq: 15.84 cm-1

|    |           |           |           |
|----|-----------|-----------|-----------|
| C  | 3.205488  | -0.863902 | -0.708812 |
| H  | 3.538004  | -1.382355 | 0.201595  |
| C  | 3.460976  | 0.655765  | -0.683453 |
| H  | 3.741867  | 1.025940  | -1.683323 |
| C  | 1.135151  | 0.275973  | -0.522131 |
| C  | 0.975498  | -2.107865 | -0.911247 |
| C  | 0.126417  | -2.195246 | -2.019257 |
| C  | 1.055434  | -3.190970 | -0.017261 |
| C  | -0.592723 | -3.357930 | -2.274502 |
| H  | 0.046734  | -1.336214 | -2.689080 |
| C  | 0.332037  | -4.355475 | -0.285231 |
| C  | -0.475791 | -4.449294 | -1.415978 |
| H  | -1.238563 | -3.398408 | -3.153239 |
| H  | 0.394559  | -5.179625 | 0.427687  |
| H  | -1.028537 | -5.370642 | -1.613214 |
| S  | 1.982638  | -3.130759 | 1.523431  |
| O  | 1.303678  | -4.113099 | 2.420296  |
| O  | 1.798872  | -1.743630 | 2.051197  |
| O  | 3.378435  | -3.478855 | 1.199273  |
| Cu | -0.845114 | 0.520651  | -0.624829 |
| C  | 3.810783  | -1.539346 | -1.914951 |
| C  | 4.848350  | -2.474617 | -1.755374 |
| C  | 3.348055  | -1.248065 | -3.212643 |
| C  | 5.405728  | -3.109304 | -2.869469 |
| H  | 5.231246  | -2.710252 | -0.770796 |
| C  | 3.907606  | -1.886063 | -4.322965 |
| H  | 2.549447  | -0.533444 | -3.363703 |
| C  | 4.935200  | -2.816396 | -4.151728 |
| H  | 6.204067  | -3.828271 | -2.738404 |
| H  | 3.543494  | -1.659515 | -5.316690 |
| H  | 5.367742  | -3.309462 | -5.012650 |
| N  | 1.721851  | -0.912791 | -0.749162 |
| N  | 2.119793  | 1.175046  | -0.340951 |
| C  | -2.596906 | 0.652345  | 0.433588  |
| C  | -2.949018 | 2.070598  | 0.535688  |
| C  | -4.206064 | 2.523942  | 0.097250  |
| C  | -2.052075 | 3.023505  | 1.049932  |
| C  | -4.546551 | 3.871691  | 0.172408  |
| C  | -2.386087 | 4.371631  | 1.116903  |
| C  | -3.638727 | 4.805032  | 0.677363  |
| H  | -5.529853 | 4.200300  | -0.174136 |
| H  | -1.662751 | 5.090976  | 1.509408  |
| H  | -3.904184 | 5.863662  | 0.725813  |
| C  | -1.598948 | 0.017311  | 1.200461  |
| C  | -1.605802 | -1.458985 | 1.359072  |

|    |           |           |           |
|----|-----------|-----------|-----------|
| H  | -1.948771 | -1.972916 | 0.449437  |
| H  | -0.612379 | -1.847514 | 1.621701  |
| H  | -1.068029 | 2.692193  | 1.382876  |
| H  | -1.071539 | 0.579633  | 1.981658  |
| P  | -2.369892 | -1.395823 | 3.887198  |
| O  | -3.287496 | -2.400856 | 4.722771  |
| O  | -0.982343 | -1.330944 | 4.429040  |
| O  | -3.142931 | 0.015168  | 3.886349  |
| O  | -2.547339 | -1.922844 | 2.394414  |
| Na | 0.930918  | -2.480294 | 4.202086  |
| H  | -3.354710 | 0.028901  | -0.055161 |
| H  | -4.907698 | 1.801843  | -0.325988 |
| C  | -4.645062 | -2.643655 | 4.356645  |
| H  | -5.089138 | -3.248006 | 5.153429  |
| H  | -5.203815 | -1.702348 | 4.263077  |
| H  | -4.697618 | -3.194920 | 3.408564  |
| C  | -2.685598 | 1.115199  | 4.666817  |
| H  | -3.343281 | 1.960280  | 4.438612  |
| H  | -2.738984 | 0.897178  | 5.742410  |
| H  | -1.652218 | 1.382906  | 4.406037  |
| C  | 1.845614  | 2.559744  | -0.215335 |
| C  | 1.853634  | 3.406503  | -1.353037 |
| C  | 1.637135  | 3.122235  | 1.068645  |
| C  | 1.677360  | 4.787884  | -1.189223 |
| C  | 1.460007  | 4.506292  | 1.200567  |
| C  | 1.475785  | 5.340814  | 0.078400  |
| H  | 3.657529  | 0.109841  | 2.025040  |
| H  | 5.390169  | 0.867406  | 3.592628  |
| C  | 4.464071  | 0.723979  | 1.654596  |
| C  | 5.447460  | 1.152918  | 2.550226  |
| C  | 4.524219  | 1.090544  | 0.297199  |
| C  | 6.502199  | 1.950846  | 2.103056  |
| H  | 7.262358  | 2.282952  | 2.798214  |
| C  | 5.593780  | 1.894171  | -0.140662 |
| C  | 6.575463  | 2.320599  | 0.758650  |
| H  | 5.667442  | 2.198058  | -1.177465 |
| H  | 7.392725  | 2.940200  | 0.412758  |
| C  | -1.338515 | 1.185999  | -2.504997 |
| H  | -0.448686 | 0.906622  | -3.092758 |
| C  | -1.563703 | 2.686839  | -2.465672 |
| H  | -0.850826 | 3.242095  | -1.830638 |
| H  | -1.504233 | 3.160482  | -3.464171 |
| H  | -2.560240 | 2.932565  | -2.068032 |
| B  | -2.554844 | 0.322506  | -2.796174 |
| O  | -2.535567 | -0.982851 | -3.299939 |
| O  | -3.872896 | 0.727427  | -2.568011 |
| C  | -4.747133 | -0.229459 | -3.185607 |
| C  | -3.867387 | -1.521708 | -3.203738 |
| C  | -6.019839 | -0.340594 | -2.371153 |
| H  | -5.815668 | -0.561334 | -1.315378 |
| H  | -6.578689 | 0.604873  | -2.411610 |
| H  | -6.676187 | -1.130368 | -2.765843 |
| C  | -5.062581 | 0.276911  | -4.586418 |
| H  | -4.153715 | 0.345528  | -5.200949 |
| H  | -5.782228 | -0.369432 | -5.108493 |
| H  | -5.497717 | 1.283397  | -4.520313 |
| C  | -4.118461 | -2.436318 | -4.385371 |
| H  | -5.163748 | -2.778413 | -4.403423 |
| H  | -3.903325 | -1.938728 | -5.338965 |
| H  | -3.481391 | -3.329767 | -4.323471 |
| C  | -3.971719 | -2.308665 | -1.905057 |
| H  | -3.211251 | -3.100367 | -1.880964 |
| H  | -3.806041 | -1.663568 | -1.030490 |
| H  | -4.955813 | -2.784749 | -1.791538 |
| C  | 2.019670  | 2.881572  | -2.755019 |
| H  | 1.268527  | 3.349082  | -3.426172 |
| H  | 3.035083  | 3.131980  | -3.126700 |
| H  | 1.867050  | 1.787450  | -2.818178 |
| C  | 1.604050  | 2.286639  | 2.322168  |
| H  | 0.713538  | 2.547510  | 2.931472  |
| H  | 1.547117  | 1.202133  | 2.108418  |
| H  | 2.511836  | 2.491600  | 2.926784  |
| C  | 1.268095  | 6.820115  | 0.218866  |
| H  | 2.154964  | 7.360399  | -0.174093 |
| H  | 0.370594  | 7.126320  | -0.358880 |
| H  | 1.118942  | 7.113581  | 1.279785  |
| H  | 1.683262  | 5.437161  | -2.057530 |
| H  | 1.301848  | 4.932542  | 2.184544  |

123

Figure\_S9\_imid-2\_modeC\_ts(AS)\_01 / electronic energy: -4442.810779672690 a.u. / lowest freq: -218.49 cm-1

|   |          |           |          |
|---|----------|-----------|----------|
| C | 3.250845 | 0.124217  | 0.997015 |
| H | 3.660729 | 1.011622  | 0.495888 |
| C | 3.388414 | -1.174999 | 0.173325 |
| H | 3.657143 | -2.028278 | 0.816220 |
| C | 1.104832 | -0.589401 | 0.302842 |
| C | 1.110417 | 1.268767  | 1.850581 |
| C | 0.223383 | 0.819808  | 2.833830 |
| C | 1.295209 | 2.652578  | 1.668777 |

|    |           |           |           |
|----|-----------|-----------|-----------|
| C  | -0.442897 | 1.719981  | 3.658272  |
| H  | 0.073143  | -0.254505 | 2.959465  |
| C  | 0.619261  | 3.546079  | 2.502084  |
| C  | -0.235930 | 3.088054  | 3.501304  |
| H  | -1.115232 | 1.335698  | 4.426732  |
| H  | 0.762626  | 4.615029  | 2.336371  |
| H  | -0.748833 | 3.804003  | 4.147176  |
| S  | 2.323130  | 3.358240  | 0.371034  |
| O  | 1.835485  | 4.758352  | 0.207490  |
| O  | 2.027536  | 2.557661  | -0.857132 |
| O  | 3.717439  | 3.262787  | 0.840117  |
| Cu | -0.893036 | -0.707123 | 0.221814  |
| C  | 3.860692  | 0.007359  | 2.372364  |
| C  | 4.991069  | 0.771159  | 2.712395  |
| C  | 3.315348  | -0.868311 | 3.330891  |
| C  | 5.556066  | 0.669152  | 3.987206  |
| H  | 5.441657  | 1.440074  | 1.990528  |
| C  | 3.882905  | -0.965756 | 4.604186  |
| H  | 2.447079  | -1.469447 | 3.095031  |
| C  | 5.001661  | -0.196887 | 4.932708  |
| H  | 6.425964  | 1.260791  | 4.241495  |
| H  | 3.454674  | -1.637725 | 5.336637  |
| H  | 5.440473  | -0.273911 | 5.919069  |
| N  | 1.773672  | 0.281590  | 1.073608  |
| N  | 2.007176  | -1.362473 | -0.319012 |
| C  | -2.686008 | -0.269674 | -0.673094 |
| C  | -3.257837 | -1.392514 | -1.413102 |
| C  | -4.563085 | -1.832325 | -1.128972 |
| C  | -2.528990 | -2.083607 | -2.399383 |
| C  | -5.112941 | -2.919394 | -1.800149 |
| C  | -3.075836 | -3.173441 | -3.066962 |
| C  | -4.372077 | -3.599037 | -2.769288 |
| H  | -6.129597 | -3.242954 | -1.563608 |
| H  | -2.483233 | -3.700207 | -3.819077 |
| H  | -4.802736 | -4.457158 | -3.290429 |
| C  | -1.662653 | 0.571417  | -1.198902 |
| C  | -1.224130 | 1.726043  | -0.529635 |
| H  | -1.557261 | 1.904086  | 0.497092  |
| H  | -0.260146 | 2.166524  | -0.793993 |
| H  | -1.506872 | -1.773134 | -2.625308 |
| H  | -1.260317 | 0.372038  | -2.196198 |
| P  | -2.009842 | 3.671109  | -2.592111 |
| O  | -2.987686 | 4.916436  | -2.968737 |
| O  | -0.629018 | 4.029399  | -3.064326 |
| O  | -2.619148 | 2.419870  | -3.448328 |
| O  | -2.270621 | 3.291219  | -1.126382 |
| Na | 1.288199  | 4.555022  | -2.114563 |
| H  | -3.325445 | 0.141045  | 0.117162  |
| H  | -5.138524 | -1.314983 | -0.358965 |
| C  | -4.367256 | 4.833424  | -2.653685 |
| H  | -4.846226 | 5.748905  | -3.019069 |
| H  | -4.840611 | 3.967291  | -3.142205 |
| H  | -4.527691 | 4.754544  | -1.568646 |
| C  | -2.434251 | 2.387651  | -4.851012 |
| H  | -2.834621 | 1.434864  | -5.217380 |
| H  | -2.973075 | 3.209458  | -5.349481 |
| H  | -1.369699 | 2.454923  | -5.120238 |
| C  | 1.618004  | -2.450901 | -1.139626 |
| C  | 1.588156  | -3.771331 | -0.623289 |
| C  | 1.319649  | -2.233028 | -2.508342 |
| C  | 1.295273  | -4.843352 | -1.478381 |
| C  | 1.022317  | -3.324036 | -3.336708 |
| C  | 1.007083  | -4.626778 | -2.828536 |
| H  | 3.571290  | 0.691418  | -1.860436 |
| H  | 5.207558  | 0.770035  | -3.692303 |
| C  | 4.335500  | -0.069048 | -1.911984 |
| C  | 5.264339  | -0.020279 | -2.955028 |
| C  | 4.396013  | -1.092398 | -0.948108 |
| C  | 6.264296  | -0.990187 | -3.048248 |
| H  | 6.982398  | -0.951460 | -3.857078 |
| C  | 5.409816  | -2.063191 | -1.052766 |
| C  | 6.337216  | -2.010311 | -2.097546 |
| H  | 5.481454  | -2.866805 | -0.330357 |
| H  | 7.111938  | -2.762554 | -2.171005 |
| C  | -1.428881 | -2.245642 | 1.452336  |
| H  | -0.495913 | -2.349754 | 2.028684  |
| C  | -1.761322 | -3.486860 | 0.652623  |
| H  | -1.123039 | -3.646544 | -0.232905 |
| H  | -1.670267 | -4.407288 | 1.257448  |
| H  | -2.794974 | -3.461669 | 0.279669  |
| B  | -2.577166 | -1.629062 | 2.254937  |
| O  | -2.442457 | -0.778940 | 3.346432  |
| O  | -3.914842 | -1.854422 | 1.963139  |
| C  | -4.698641 | -1.343077 | 3.059410  |
| C  | -3.752207 | -0.253348 | 3.662409  |
| C  | -6.012877 | -0.813902 | 2.525080  |
| H  | -5.866491 | -0.075905 | 1.726111  |
| H  | -6.612803 | -1.637241 | 2.112880  |

|   |           |           |           |
|---|-----------|-----------|-----------|
| H | -6.602492 | -0.341253 | 3.324142  |
| C | -4.943689 | -2.500646 | 4.016028  |
| H | -4.000594 | -2.891169 | 4.423608  |
| H | -5.587228 | -2.210045 | 4.858062  |
| H | -5.440040 | -3.319563 | 3.478308  |
| C | -3.868284 | -0.079208 | 5.161703  |
| H | -4.893208 | 0.201037  | 5.444859  |
| H | -3.598871 | -0.994042 | 5.702812  |
| H | -3.202381 | 0.722615  | 5.509670  |
| C | -3.898558 | 1.089393  | 2.963185  |
| H | -3.090105 | 1.766054  | 3.269020  |
| H | -3.846910 | 0.985621  | 1.870307  |
| H | -4.853489 | 1.574583  | 3.208431  |
| C | 1.819026  | -4.079019 | 0.832587  |
| H | 1.035812  | -4.775559 | 1.199796  |
| H | 2.812268  | -4.558284 | 0.957959  |
| H | 1.765500  | -3.176092 | 1.469629  |
| C | 1.323637  | -0.861196 | -3.131201 |
| H | 0.391667  | -0.706953 | -3.713797 |
| H | 1.380458  | -0.049445 | -2.380930 |
| H | 2.186466  | -0.773210 | -3.823762 |
| C | 0.672770  | -5.791891 | -3.712855 |
| H | 1.524365  | -6.504192 | -3.729335 |
| H | -0.227293 | -6.310596 | -3.320548 |
| H | 0.464571  | -5.468391 | -4.754939 |
| H | 1.272430  | -5.853595 | -1.085377 |
| H | 0.797238  | -3.153549 | -4.383248 |

123

Figure\_S9\_imid-2\_modeCs(A5)\_02 / electronic energy: -4442.811522350486 a.u. / lowest freq: -249.65 cm<sup>-1</sup>

|    |           |           |           |
|----|-----------|-----------|-----------|
| C  | -2.981507 | -0.783340 | 1.259697  |
| H  | -3.307638 | -1.708497 | 0.765262  |
| C  | -3.521835 | 0.506384  | 0.599421  |
| H  | -3.899024 | 1.216772  | 1.351882  |
| C  | -1.168489 | 0.436064  | 0.342980  |
| C  | -0.561079 | -1.567100 | 1.572815  |
| C  | 0.353602  | -1.078661 | 2.508867  |
| C  | -0.502841 | -2.923697 | 1.193140  |
| C  | 1.300788  | -1.916565 | 3.089832  |
| H  | 0.310176  | -0.023563 | 2.786021  |
| C  | 0.440794  | -3.756627 | 1.794749  |
| C  | 1.334394  | -3.264578 | 2.744900  |
| H  | 1.998717  | -1.500786 | 3.818681  |
| H  | 0.471828  | -4.802748 | 1.486960  |
| H  | 2.064025  | -3.936682 | 3.202606  |
| S  | -1.502970 | -3.630172 | -0.130890 |
| O  | -0.896686 | -4.961858 | -0.418035 |
| O  | -1.303547 | -2.700614 | -1.283862 |
| O  | -2.891222 | -3.713290 | 0.360739  |
| Cu | 0.708587  | 1.066273  | 0.049347  |
| C  | -3.312234 | -0.874969 | 2.730033  |
| C  | -4.147992 | -1.901979 | 3.203689  |
| C  | -2.786164 | 0.053887  | 3.647938  |
| C  | -4.449667 | -1.996793 | 4.565617  |
| H  | -4.569543 | -2.628579 | 2.520680  |
| C  | -3.089521 | -0.045766 | 5.008405  |
| H  | -2.132604 | 0.847382  | 3.312736  |
| C  | -3.920915 | -1.069954 | 5.467103  |
| H  | -5.094106 | -2.789829 | 4.922304  |
| H  | -2.677804 | 0.670471  | 5.707629  |
| H  | -4.154922 | -1.145843 | 6.521085  |
| N  | -1.513994 | -0.650407 | 1.050731  |
| N  | -2.298323 | 1.063723  | -0.016223 |
| C  | 2.402836  | 1.282502  | -1.077012 |
| C  | 2.508319  | 2.596915  | -1.708509 |
| C  | 3.645105  | 3.395337  | -1.486888 |
| C  | 1.483049  | 3.119566  | -2.518029 |
| C  | 3.746249  | 4.664812  | -2.046747 |
| C  | 1.580331  | 4.391278  | -3.072278 |
| C  | 2.713034  | 5.172665  | -2.836765 |
| H  | 4.638177  | 5.268102  | -1.860932 |
| H  | 0.764738  | 4.777042  | -3.688814 |
| H  | 2.790173  | 6.173219  | -3.268467 |
| C  | 1.614691  | 0.216564  | -1.601847 |
| C  | 1.607262  | -1.055230 | -0.998591 |
| H  | 2.023521  | -1.167902 | 0.008375  |
| H  | 0.801468  | -1.751053 | -1.249470 |
| H  | 0.590615  | 2.519778  | -2.702858 |
| H  | 1.067276  | 0.342760  | -2.541078 |
| P  | 2.597271  | -3.240963 | -2.608520 |
| O  | 2.130837  | -4.484069 | -1.631554 |
| O  | 1.435245  | -3.095927 | -3.548989 |
| O  | 3.960566  | -3.769857 | -3.311507 |
| O  | 3.087220  | -2.074237 | -1.737870 |
| Na | -0.201466 | -4.457280 | -2.654504 |
| H  | 3.232614  | 1.024608  | -0.409691 |
| H  | 4.443594  | 3.010426  | -0.850071 |
| C  | 2.954473  | -4.874810 | -0.547064 |
| H  | 2.427921  | -5.661636 | 0.005234  |

|   |           |           |           |
|---|-----------|-----------|-----------|
| H | 3.918005  | -5.273281 | -0.901808 |
| H | 3.152016  | -4.029900 | 0.130800  |
| C | 3.877157  | -4.832498 | -4.248174 |
| H | 4.882033  | -4.993753 | -4.653377 |
| H | 3.536758  | -5.764570 | -3.769864 |
| H | 3.193498  | -4.587669 | -5.073796 |
| C | -2.287400 | 2.269192  | -0.763121 |
| C | -2.489215 | 3.516585  | -0.120057 |
| C | -2.154614 | 2.229588  | -2.174816 |
| C | -2.573428 | 4.687419  | -0.886873 |
| C | -2.239756 | 3.417613  | -2.914189 |
| C | -2.443719 | 4.645594  | -2.277435 |
| H | -3.537197 | -1.229233 | -1.554689 |
| H | -5.325431 | -1.566736 | -3.206845 |
| C | -4.449448 | -0.658690 | -1.462749 |
| C | -5.463880 | -0.854527 | -2.403741 |
| C | -4.615349 | 0.265642  | -0.414511 |
| C | -6.654760 | -0.131733 | -2.310325 |
| H | -7.439024 | -0.283826 | -3.040513 |
| C | -5.821300 | 0.986485  | -0.330721 |
| C | -6.833395 | 0.787461  | -1.274412 |
| H | -5.978349 | 1.709241  | 0.460319  |
| H | -7.756366 | 1.348281  | -1.203330 |
| C | 1.057615  | 2.474949  | 1.491968  |
| H | 0.224489  | 2.241020  | 2.173622  |
| C | 0.970443  | 3.878779  | 0.932412  |
| H | 0.197169  | 4.015681  | 0.157315  |
| H | 0.745635  | 4.624762  | 1.715786  |
| H | 1.916975  | 4.192708  | 0.470563  |
| B | 2.425316  | 2.017751  | 2.007094  |
| O | 2.651293  | 0.971785  | 2.895076  |
| O | 3.625101  | 2.592831  | 1.608473  |
| C | 4.669873  | 2.076907  | 2.456291  |
| C | 4.072226  | 0.708966  | 2.925700  |
| C | 5.950937  | 1.965177  | 1.657160  |
| H | 5.818998  | 1.372440  | 0.743274  |
| H | 6.300333  | 2.963835  | 1.360457  |
| H | 6.747747  | 1.498723  | 2.254765  |
| C | 4.845623  | 3.060810  | 3.603784  |
| H | 3.928852  | 3.143586  | 4.204135  |
| H | 5.668951  | 2.771968  | 4.271530  |
| H | 5.071794  | 4.056659  | 3.199418  |
| C | 4.472051  | 0.301286  | 4.328469  |
| H | 5.565346  | 0.221815  | 4.415423  |
| H | 4.117917  | 1.016829  | 5.080024  |
| H | 4.052319  | -0.682896 | 4.578721  |
| C | 4.365464  | -0.424135 | 1.952366  |
| H | 3.762524  | -1.305784 | 2.210020  |
| H | 4.127217  | -0.155077 | 0.913558  |
| H | 5.423310  | -0.719695 | 1.982034  |
| C | -2.586633 | 3.648865  | 1.376264  |
| H | -1.967916 | 4.503460  | 1.723020  |
| H | -3.642779 | 3.830778  | 1.665144  |
| H | -2.211921 | 2.750435  | 1.900864  |
| C | -1.939148 | 0.947493  | -2.936283 |
| H | -1.089921 | 1.063227  | -3.641124 |
| H | -1.703371 | 0.090788  | -2.277842 |
| H | -2.850155 | 0.710245  | -3.524207 |
| C | -2.514017 | 5.918376  | -3.068869 |
| H | -3.497412 | 6.406737  | -2.903712 |
| H | -1.706657 | 6.606091  | -2.739779 |
| H | -2.392560 | 5.730976  | -4.157026 |
| H | -2.726186 | 5.641926  | -0.395840 |
| H | -2.139165 | 3.382984  | -3.992937 |

123

Figure\_S9\_imid-2\_modeC\_ts(AS)\_03 / electronic energy: -4442.811687210238 a.u. / lowest freq: -237.15 cm-1

|    |           |           |           |
|----|-----------|-----------|-----------|
| C  | 2.879620  | 1.190014  | 1.215339  |
| H  | 3.103196  | 2.132153  | 0.697668  |
| C  | 3.588560  | -0.043206 | 0.608978  |
| H  | 4.050013  | -0.668752 | 1.389243  |
| C  | 1.248431  | -0.280514 | 0.323628  |
| C  | 0.375200  | 1.680895  | 1.458901  |
| C  | -0.485195 | 1.111098  | 2.400706  |
| C  | 0.153079  | 3.007153  | 1.034755  |
| C  | -1.533811 | 1.842974  | 2.949002  |
| H  | -0.317007 | 0.077758  | 2.710336  |
| C  | -0.897319 | 3.732451  | 1.598728  |
| C  | -1.731867 | 3.163746  | 2.558943  |
| H  | -2.180698 | 1.368346  | 3.688453  |
| H  | -1.061424 | 4.752582  | 1.247792  |
| H  | -2.545930 | 3.753234  | 2.987499  |
| S  | 1.074796  | 3.795734  | -0.300073 |
| O  | 0.332663  | 5.055039  | -0.596673 |
| O  | 0.967944  | 2.842403  | -1.445888 |
| O  | 2.446995  | 4.030747  | 0.186287  |
| Cu | -0.532324 | -1.151207 | 0.043781  |
| C  | 3.162141  | 1.368946  | 2.687820  |
| C  | 3.859863  | 2.503408  | 3.139431  |

|    |           |           |           |
|----|-----------|-----------|-----------|
| C  | 2.728697  | 0.415846  | 3.628763  |
| C  | 4.117839  | 2.679104  | 4.502250  |
| H  | 4.207771  | 3.251563  | 2.438338  |
| C  | 2.987700  | 0.596502  | 4.990080  |
| H  | 2.179399  | -0.459258 | 3.311068  |
| C  | 3.682211  | 1.726833  | 5.426696  |
| H  | 4.656107  | 3.554577  | 4.841745  |
| H  | 2.647372  | -0.139355 | 5.707081  |
| H  | 3.882039  | 1.865344  | 6.481337  |
| N  | 1.443746  | 0.874625  | 0.979558  |
| N  | 2.453745  | -0.779130 | 0.011075  |
| C  | -2.174759 | -1.625191 | -1.084781 |
| C  | -2.091009 | -2.961132 | -1.671821 |
| C  | -3.112575 | -3.903014 | -1.454070 |
| C  | -0.980957 | -3.357586 | -2.439691 |
| C  | -3.021175 | -5.187304 | -1.981942 |
| C  | -0.884548 | -4.642561 | -2.960827 |
| C  | -1.906128 | -5.566274 | -2.732936 |
| H  | -3.825984 | -5.904267 | -1.802517 |
| H  | -0.005856 | -4.926690 | -3.544905 |
| H  | -1.833588 | -6.578053 | -3.138403 |
| C  | -1.527164 | -0.482935 | -1.642040 |
| C  | -1.712303 | 0.797858  | -1.093156 |
| H  | -2.147223 | 0.886479  | -0.092366 |
| H  | -1.026177 | 1.600727  | -1.377838 |
| H  | -0.175486 | -2.643505 | -2.614432 |
| H  | -0.954825 | -0.569095 | -2.570729 |
| P  | -3.134090 | 2.873351  | -2.571194 |
| O  | -2.916740 | 4.039244  | -1.430534 |
| O  | -2.003948 | 3.086170  | -3.537584 |
| O  | -4.597027 | 3.196021  | -3.198313 |
| O  | -3.349931 | 1.523460  | -1.871385 |
| Na | -0.399936 | 4.453219  | -2.747338 |
| H  | -3.044504 | -1.454231 | -0.440751 |
| H  | -3.973436 | -3.617303 | -0.846428 |
| C  | -3.816685 | 4.096669  | -0.337691 |
| H  | -3.523013 | 4.940601  | 0.297374  |
| H  | -4.851765 | 4.255266  | -0.679285 |
| H  | -3.784229 | 3.170989  | 0.258562  |
| C  | -4.758450 | 4.359689  | -3.993163 |
| H  | -5.790914 | 4.367326  | -4.359744 |
| H  | -4.587213 | 5.275792  | -3.405948 |
| H  | -4.073794 | 4.357866  | -4.853701 |
| C  | 2.606865  | -2.008608 | -0.679269 |
| C  | 2.946652  | -3.191919 | 0.024083  |
| C  | 2.499539  | -2.048640 | -2.093167 |
| C  | 3.186125  | -4.377196 | -0.685601 |
| C  | 2.741238  | -3.249768 | -2.774587 |
| C  | 3.078525  | -4.414225 | -2.078083 |
| H  | 3.392988  | 1.609163  | -1.600848 |
| H  | 5.130490  | 2.112307  | -3.265865 |
| C  | 4.370011  | 1.161082  | -1.490883 |
| C  | 5.354728  | 1.450657  | -2.439232 |
| C  | 4.647327  | 0.300112  | -0.412385 |
| C  | 6.626414  | 0.886106  | -2.323018 |
| H  | 7.387523  | 1.110260  | -3.059123 |
| C  | 5.933780  | -0.260374 | -0.305548 |
| C  | 6.915725  | 0.031987  | -1.256790 |
| H  | 6.177559  | -0.931078 | 0.509008  |
| H  | 7.901379  | -0.406282 | -1.168163 |
| C  | -0.724490 | -2.547614 | 1.526521  |
| H  | 0.064844  | -2.191508 | 2.208017  |
| C  | -0.461565 | -3.947480 | 1.016441  |
| H  | 0.340022  | -4.015478 | 0.261777  |
| H  | -0.169937 | -4.637540 | 1.828529  |
| H  | -1.354695 | -4.382373 | 0.546298  |
| B  | -2.143789 | -2.245314 | 2.015989  |
| O  | -2.504221 | -1.200637 | 2.859620  |
| O  | -3.258495 | -2.979397 | 1.635387  |
| C  | -4.372188 | -2.556608 | 2.447021  |
| C  | -3.946760 | -1.112088 | 2.874053  |
| C  | -5.639187 | -2.623303 | 1.620603  |
| H  | -5.555990 | -2.050281 | 0.688118  |
| H  | -5.861962 | -3.665829 | 1.354697  |
| H  | -6.499046 | -2.233960 | 2.184975  |
| C  | -4.459977 | -3.514850 | 3.625573  |
| H  | -3.552786 | -3.476682 | 4.244827  |
| H  | -5.324012 | -3.297102 | 4.268231  |
| H  | -4.566611 | -4.542158 | 3.252259  |
| C  | -4.403269 | -0.709600 | 4.261144  |
| H  | -5.499629 | -0.743580 | 4.338728  |
| H  | -3.982939 | -1.361343 | 5.036348  |
| H  | -4.092718 | 0.320521  | 4.484939  |
| C  | -4.366930 | -0.054844 | 1.862644  |
| H  | -3.898581 | 0.908304  | 2.107822  |
| H  | -4.067491 | -0.315727 | 0.837252  |
| H  | -5.455565 | 0.094345  | 1.861383  |
| C  | 3.032060  | -3.244503 | 1.525876  |



|   |          |           |           |
|---|----------|-----------|-----------|
| H | 2.504795 | -4.145585 | 1.904553  |
| H | 4.096593 | -3.295210 | 1.835888  |
| H | 2.552804 | -2.370294 | 2.003129  |
| C | 2.147777 | -0.837628 | -2.917596 |
| H | 1.333829 | -1.085958 | -3.629785 |
| H | 1.796586 | 0.012397  | -2.303906 |
| H | 3.036071 | -0.518489 | -3.501482 |
| C | 3.315312 | -5.703835 | -2.807547 |
| H | 4.346748 | -6.062425 | -2.606588 |
| H | 2.589924 | -6.468037 | -2.456935 |
| H | 3.192581 | -5.581944 | -3.904822 |
| H | 3.443352 | -5.283028 | -0.148142 |
| H | 2.658311 | -3.276196 | -3.855064 |

123

Figure\_S9\_imid-2\_modeC\_ts(AS)\_04 / electronic energy: -4442.802341399660 a.u. / lowest freq: -226.82 cm-1

|    |           |           |           |
|----|-----------|-----------|-----------|
| C  | 1.481747  | 2.781798  | -0.534930 |
| H  | 2.427511  | 2.779579  | 0.020997  |
| C  | 0.266290  | 3.197869  | 0.318931  |
| H  | -0.326512 | 3.973740  | -0.187675 |
| C  | -0.031112 | 0.953133  | -0.383944 |
| C  | 1.928106  | 0.564283  | -1.758705 |
| C  | 1.259314  | -0.045250 | -2.828317 |
| C  | 3.299609  | 0.288715  | -1.570753 |
| C  | 1.903745  | -0.934825 | -3.681463 |
| H  | 0.209693  | 0.206184  | -2.982641 |
| C  | 3.941180  | -0.585120 | -2.452318 |
| C  | 3.257100  | -1.204165 | -3.495843 |
| H  | 1.347009  | -1.402018 | -4.496915 |
| H  | 4.996711  | -0.800190 | -2.278808 |
| H  | 3.783942  | -1.893652 | -4.158648 |
| S  | 4.286224  | 0.892126  | -0.185594 |
| O  | 5.504611  | 0.038038  | -0.157412 |
| O  | 3.433748  | 0.630517  | 1.015568  |
| O  | 4.566424  | 2.315847  | -0.442438 |
| Cu | -0.778233 | -0.869793 | -0.829791 |
| C  | 1.634088  | 3.642318  | -1.767035 |
| C  | 2.710181  | 4.540558  | -1.877091 |
| C  | 0.689288  | 3.580228  | -2.809450 |
| C  | 2.850300  | 5.340898  | -3.014974 |
| H  | 3.434985  | 4.632847  | -1.079035 |
| C  | 0.833841  | 4.381463  | -3.945103 |
| H  | -0.156634 | 2.909730  | -2.744509 |
| C  | 1.915030  | 5.259264  | -4.049292 |
| H  | 3.682544  | 6.028467  | -3.092725 |
| H  | 0.105933  | 4.322759  | -4.743951 |
| H  | 2.025096  | 5.880215  | -4.928901 |
| N  | 1.142495  | 1.381470  | -0.902655 |
| N  | -0.519547 | 1.943031  | 0.374903  |
| C  | -0.647311 | -2.919826 | -0.801104 |
| C  | -1.850240 | -3.711849 | -0.571285 |
| C  | -2.458437 | -4.361936 | -1.660065 |
| C  | -2.420874 | -3.879210 | 0.703065  |
| C  | -3.591087 | -5.148790 | -1.485888 |
| C  | -3.548801 | -4.671154 | 0.877695  |
| C  | -4.141201 | -5.309053 | -0.214203 |
| H  | -4.044762 | -5.647094 | -2.346140 |
| H  | -3.974338 | -4.792571 | 1.877528  |
| H  | -5.028222 | -5.931295 | -0.072068 |
| C  | 0.212087  | -2.406913 | 0.206883  |
| C  | 1.544483  | -2.068170 | -0.074638 |
| H  | 1.865071  | -2.038356 | -1.117511 |
| H  | 2.105032  | -1.426031 | 0.609381  |
| H  | -1.978870 | -3.380001 | 1.569579  |
| H  | -0.097417 | -2.423713 | 1.255839  |
| P  | 3.666048  | -3.555563 | 1.312941  |
| O  | 5.046999  | -2.959079 | 0.640527  |
| O  | 3.472111  | -2.674859 | 2.514975  |
| O  | 4.027643  | -5.097035 | 1.668339  |
| O  | 2.592477  | -3.691107 | 0.225661  |
| Na | 4.958566  | -0.919036 | 2.045945  |
| H  | -0.186283 | -3.070859 | -1.787731 |
| H  | -2.020192 | -4.248897 | -2.656199 |
| C  | 5.485134  | -3.418960 | -0.625289 |
| H  | 6.308765  | -2.771685 | -0.947555 |
| H  | 5.845462  | -4.458236 | -0.567643 |
| H  | 4.675401  | -3.368250 | -1.368885 |
| C  | 5.017168  | -5.358103 | 2.650428  |
| H  | 5.035723  | -6.440094 | 2.820989  |
| H  | 6.014991  | -5.037950 | 2.311153  |
| H  | 4.786221  | -4.850930 | 3.598520  |
| C  | -1.707414 | 1.832932  | 1.147393  |
| C  | -2.829492 | 2.645483  | 0.841494  |
| C  | -1.717271 | 1.069454  | 2.346677  |
| C  | -3.878764 | 2.760083  | 1.762649  |
| C  | -2.798815 | 1.180684  | 3.232443  |
| C  | -3.868888 | 2.035700  | 2.956302  |
| H  | 1.699556  | 1.936254  | 2.306749  |
| H  | 2.244992  | 2.781996  | 4.551753  |

|   |           |           |           |
|---|-----------|-----------|-----------|
| C | 1.368198  | 2.922126  | 2.590812  |
| C | 1.677421  | 3.399090  | 3.867340  |
| C | 0.628752  | 3.711233  | 1.692621  |
| C | 1.252549  | 4.669410  | 4.261656  |
| H | 1.491938  | 5.037549  | 5.250860  |
| C | 0.205320  | 4.989586  | 2.101830  |
| C | 0.517187  | 5.463952  | 3.379455  |
| H | -0.371195 | 5.619562  | 1.435850  |
| H | 0.186343  | 6.447743  | 3.686278  |
| C | -2.342341 | -0.780413 | -2.143526 |
| H | -2.274951 | -1.767148 | -2.632187 |
| C | -2.240549 | 0.339776  | -3.161887 |
| H | -1.462008 | 0.176227  | -3.923560 |
| H | -3.180007 | 0.472797  | -3.730458 |
| H | -2.038261 | 1.319117  | -2.703209 |
| B | -3.635372 | -0.744458 | -1.311206 |
| O | -4.277520 | -1.860894 | -0.806895 |
| O | -4.382895 | 0.406013  | -1.089187 |
| C | -5.721739 | -0.039478 | -0.772053 |
| C | -5.440628 | -1.409439 | -0.083957 |
| C | -6.424690 | 0.977826  | 0.094395  |
| H | -5.912821 | 1.133404  | 1.047507  |
| H | -6.486627 | 1.944501  | -0.423176 |
| H | -7.450391 | 0.650289  | 0.316941  |
| C | -6.457846 | -0.195429 | -2.096352 |
| H | -5.986709 | -0.962206 | -2.728283 |
| H | -7.512394 | -0.469405 | -1.953722 |
| H | -6.427366 | 0.756332  | -2.644177 |
| C | -6.547699 | -2.430052 | -0.229853 |
| H | -7.487151 | -2.053049 | 0.200712  |
| H | -6.727623 | -2.689143 | -1.280978 |
| H | -6.282593 | -3.355644 | 0.299666  |
| C | -5.040272 | -1.254723 | 1.374595  |
| H | -4.650316 | -2.209648 | 1.750303  |
| H | -4.245958 | -0.503790 | 1.482134  |
| H | -5.885888 | -0.959802 | 2.011287  |
| C | -2.955598 | 3.399677  | -0.454662 |
| H | -3.945496 | 3.192265  | -0.913157 |
| H | -2.871883 | 4.489594  | -0.261084 |
| H | -2.187736 | 3.101145  | -1.192869 |
| C | -0.590538 | 0.158874  | 2.758367  |
| H | -0.988177 | -0.864136 | 2.924278  |
| H | 0.217931  | 0.088339  | 2.010486  |
| H | -0.148055 | 0.524046  | 3.709004  |
| C | -5.011808 | 2.171568  | 3.919569  |
| H | -5.099434 | 3.229058  | 4.246358  |
| H | -5.957809 | 1.865614  | 3.426042  |
| H | -4.865950 | 1.537081  | 4.819534  |
| H | -4.721099 | 3.405464  | 1.539612  |
| H | -2.796238 | 0.607239  | 4.152442  |

123

Figure\_S9\_imid-2\_modeC\_ts(AS)\_05 / electronic energy: -4442.803159881789 a.u. / lowest freq: -206.12 cm-1

|    |           |           |           |
|----|-----------|-----------|-----------|
| C  | -2.261253 | -2.412453 | -0.343749 |
| H  | -3.167149 | -2.097143 | 0.222970  |
| C  | -1.173020 | -3.023453 | 0.538800  |
| H  | -0.784055 | -3.954112 | 0.098620  |
| C  | -0.369991 | -0.999878 | -0.396638 |
| C  | -2.194976 | -0.326929 | -1.843166 |
| C  | -1.430042 | -0.040178 | -2.980490 |
| C  | -3.445576 | 0.303744  | -1.688482 |
| C  | -1.869411 | 0.860998  | -3.944347 |
| H  | -0.475575 | -0.554575 | -3.094353 |
| C  | -3.888854 | 1.185473  | -2.677858 |
| C  | -3.112918 | 1.471982  | -3.797452 |
| H  | -1.243177 | 1.070331  | -4.814544 |
| H  | -4.849972 | 1.679774  | -2.528796 |
| H  | -3.479098 | 2.175629  | -4.547430 |
| S  | -4.497395 | 0.153471  | -0.233227 |
| O  | -5.380032 | 1.354980  | -0.265772 |
| O  | -3.570285 | 0.230670  | 0.937797  |
| O  | -5.217033 | -1.125262 | -0.360691 |
| Cu | 0.769823  | 0.561172  | -0.997054 |
| C  | -2.705112 | -3.342723 | -1.454413 |
| C  | -3.980891 | -3.932805 | -1.435992 |
| C  | -1.824544 | -3.653804 | -2.508511 |
| C  | -4.374519 | -4.798506 | -2.460835 |
| H  | -4.667872 | -3.734616 | -0.623671 |
| C  | -2.222882 | -4.518941 | -3.531095 |
| H  | -0.831808 | -3.224261 | -2.540161 |
| C  | -3.497740 | -5.089049 | -3.508795 |
| H  | -5.358956 | -5.247836 | -2.440096 |
| H  | -1.541904 | -4.748669 | -4.340346 |
| H  | -3.804418 | -5.759989 | -4.300737 |
| N  | -1.612683 | -1.200206 | -0.887253 |
| N  | -0.121841 | -1.982415 | 0.479672  |
| C  | 1.108794  | 2.592202  | -1.087403 |
| C  | 2.453063  | 3.101750  | -0.840706 |
| C  | 3.228562  | 3.546010  | -1.926741 |

|    |           |           |           |
|----|-----------|-----------|-----------|
| C  | 3.003058  | 3.197050  | 0.450132  |
| C  | 4.506587  | 4.058295  | -1.734520 |
| C  | 4.278861  | 3.713161  | 0.641695  |
| C  | 5.038874  | 4.143278  | -0.448213 |
| H  | 5.091328  | 4.396929  | -2.593291 |
| H  | 4.687974  | 3.782024  | 1.653215  |
| H  | 6.042176  | 4.547879  | -0.293016 |
| C  | 0.134368  | 2.343697  | -0.086500 |
| C  | -1.227757 | 2.236483  | -0.401157 |
| H  | -1.513697 | 2.214011  | -1.452657 |
| H  | -1.921967 | 1.757277  | 0.292341  |
| H  | 2.426163  | 2.862971  | 1.316815  |
| H  | 0.421133  | 2.356794  | 0.967960  |
| P  | -2.244600 | 4.457037  | 1.208178  |
| O  | -2.983256 | 5.908865  | 1.215290  |
| O  | -2.952392 | 3.588464  | 2.210135  |
| O  | -0.716788 | 4.790830  | 1.683296  |
| O  | -2.102572 | 4.002941  | -0.252689 |
| Na | -4.655436 | 2.202272  | 1.859818  |
| H  | 0.723798  | 2.785800  | -2.098490 |
| H  | 2.808411  | 3.488805  | -2.935332 |
| C  | -2.494289 | 6.940782  | 0.374952  |
| H  | -3.137438 | 7.816603  | 0.517218  |
| H  | -1.459909 | 7.214928  | 0.634891  |
| H  | -2.522201 | 6.645053  | -0.683843 |
| C  | -0.482030 | 5.142791  | 3.034340  |
| H  | 0.597605  | 5.289536  | 3.156761  |
| H  | -0.995933 | 6.079675  | 3.303644  |
| H  | -0.816803 | 4.352217  | 3.722417  |
| C  | 1.087180  | -2.088265 | 1.217756  |
| C  | 1.987141  | -3.153219 | 0.957684  |
| C  | 1.311399  | -1.257060 | 2.347809  |
| C  | 3.016878  | -3.431787 | 1.865969  |
| C  | 2.370436  | -1.542474 | 3.221364  |
| C  | 3.211259  | -2.636180 | 2.997309  |
| H  | -2.218674 | -1.300216 | 2.420680  |
| H  | -2.884794 | -1.805806 | 4.733460  |
| C  | -2.119242 | -2.309723 | 2.785711  |
| C  | -2.496612 | -2.593568 | 4.100873  |
| C  | -1.609510 | -3.321987 | 1.953750  |
| C  | -2.370731 | -3.891284 | 4.600457  |
| H  | -2.662575 | -4.109765 | 5.619512  |
| C  | -1.487224 | -4.626120 | 2.468837  |
| C  | -1.866826 | -4.906733 | 3.784860  |
| H  | -1.093438 | -5.427144 | 1.855672  |
| H  | -1.767911 | -5.912151 | 4.173159  |
| C  | 2.269489  | 0.031039  | -2.275297 |
| H  | 2.428502  | 0.972306  | -2.828428 |
| C  | 1.899369  | -1.097224 | -3.221991 |
| H  | 1.215302  | -0.783070 | -4.025679 |
| H  | 2.782959  | -1.519500 | -3.735765 |
| H  | 1.423592  | -1.951302 | -2.714696 |
| B  | 3.535653  | -0.245057 | -1.446439 |
| O  | 4.424673  | 0.723760  | -1.015638 |
| O  | 4.011391  | -1.520851 | -1.169488 |
| C  | 5.425013  | -1.376781 | -0.909770 |
| C  | 5.490547  | 0.059691  | -0.306214 |
| C  | 5.907360  | -2.476708 | 0.005709  |
| H  | 5.387216  | -2.473860 | 0.966956  |
| H  | 5.753238  | -3.458786 | -0.461267 |
| H  | 6.982701  | -2.365743 | 0.206517  |
| C  | 6.131387  | -1.474834 | -2.256135 |
| H  | 5.822654  | -0.663564 | -2.931184 |
| H  | 7.224654  | -1.437066 | -2.152975 |
| H  | 5.869815  | -2.428011 | -2.735874 |
| C  | 6.790164  | 0.790857  | -0.560779 |
| H  | 7.642278  | 0.232550  | -0.145690 |
| H  | 6.966172  | 0.946006  | -1.632653 |
| H  | 6.770252  | 1.779153  | -0.081378 |
| C  | 5.140050  | 0.083056  | 1.172295  |
| H  | 5.006572  | 1.122021  | 1.501057  |
| H  | 4.197833  | -0.450712 | 1.354730  |
| H  | 5.923370  | -0.373021 | 1.793647  |
| C  | 1.892439  | -4.010648 | -0.275541 |
| H  | 2.887431  | -4.076286 | -0.764193 |
| H  | 1.563352  | -5.032828 | 0.005835  |
| H  | 1.191610  | -3.594863 | -1.024208 |
| C  | 0.434215  | -0.083511 | 2.694446  |
| H  | 1.058883  | 0.830587  | 2.775288  |
| H  | -0.353585 | 0.111632  | 1.945667  |
| H  | -0.056153 | -0.263832 | 3.674104  |
| C  | 4.328495  | -2.953093 | 3.948018  |
| H  | 4.190248  | -3.975921 | 4.357218  |
| H  | 5.300855  | -2.904607 | 3.414932  |
| H  | 4.359113  | -2.236857 | 4.796464  |
| H  | 3.684276  | -4.266237 | 1.681617  |
| H  | 2.529369  | -0.914254 | 4.090428  |

Figure\_S9\_imid-2\_modeC\_ts(AS)\_06 / electronic energy: -4442.802591917493 a.u. / lowest freq: -226.51 cm<sup>-1</sup>

|    |           |           |           |
|----|-----------|-----------|-----------|
| C  | -0.972277 | -2.620871 | 0.515988  |
| H  | -2.044746 | -2.634502 | 0.287829  |
| C  | -0.648793 | -2.210804 | 1.971820  |
| H  | 0.059426  | -2.910718 | 2.442812  |
| C  | 0.200591  | -0.558380 | 0.509004  |
| C  | -0.260736 | -1.435004 | -1.683874 |
| C  | 0.981681  | -1.029415 | -2.192967 |
| C  | -1.319456 | -1.650113 | -2.589728 |
| C  | 1.181500  | -0.795655 | -3.547878 |
| H  | 1.806692  | -0.910432 | -1.488322 |
| C  | -1.095036 | -1.448141 | -3.955446 |
| C  | 0.135375  | -1.013449 | -4.440278 |
| H  | 2.160186  | -0.454568 | -3.893476 |
| H  | -1.930790 | -1.608318 | -4.637661 |
| H  | 0.270642  | -0.847068 | -5.510606 |
| S  | -3.004729 | -2.083748 | -2.118278 |
| O  | -3.828411 | -1.832364 | -3.337092 |
| O  | -3.374804 | -1.122826 | -1.033798 |
| O  | -2.975053 | -3.496771 | -1.704730 |
| Cu | 1.018745  | 1.153756  | -0.202906 |
| C  | -0.393581 | -3.970942 | 0.169007  |
| C  | -1.200808 | -5.117165 | 0.274897  |
| C  | 0.957944  | -4.121270 | -0.194685 |
| C  | -0.678289 | -6.381233 | -0.012771 |
| H  | -2.235030 | -5.032152 | 0.584551  |
| C  | 1.476391  | -5.387587 | -0.481372 |
| H  | 1.610797  | -3.262572 | -0.256801 |
| C  | 0.658316  | -6.516003 | -0.394144 |
| H  | -1.309012 | -7.257320 | 0.065145  |
| H  | 2.514279  | -5.496297 | -0.766918 |
| H  | 1.062056  | -7.495612 | -0.614926 |
| N  | -0.354579 | -1.514200 | -0.268909 |
| N  | 0.008737  | -0.902134 | 1.785698  |
| C  | 0.646610  | 2.964629  | -1.136332 |
| C  | 1.177157  | 4.204969  | -0.576040 |
| C  | 2.103667  | 4.961354  | -1.314826 |
| C  | 0.788008  | 4.690874  | 0.686473  |
| C  | 2.618118  | 6.155448  | -0.817475 |
| C  | 1.302697  | 5.882456  | 1.184779  |
| C  | 2.221186  | 6.621978  | 0.435738  |
| H  | 3.335047  | 6.726044  | -1.412660 |
| H  | 0.987902  | 6.237199  | 2.169183  |
| H  | 2.625541  | 7.557360  | 0.829287  |
| C  | -0.573495 | 2.369457  | -0.719246 |
| C  | -1.264737 | 1.417590  | -1.482841 |
| H  | -0.840903 | 1.108190  | -2.441008 |
| H  | -1.942495 | 0.709735  | -1.006677 |
| H  | 0.082128  | 4.121282  | 1.294802  |
| H  | -1.059305 | 2.714186  | 0.198497  |
| P  | -4.041542 | 2.549801  | -1.507109 |
| O  | -4.334611 | 4.152867  | -1.432638 |
| O  | -5.334637 | 1.878859  | -1.872504 |
| O  | -3.583708 | 2.186826  | 0.024619  |
| O  | -2.783493 | 2.315516  | -2.357505 |
| Na | -5.330501 | -0.272286 | -2.472222 |
| H  | 0.981482  | 2.735928  | -2.158575 |
| H  | 2.421236  | 4.597194  | -2.296108 |
| C  | -3.266584 | 5.005597  | -1.058243 |
| H  | -3.553802 | 6.034317  | -1.304478 |
| H  | -3.064057 | 4.944688  | 0.023717  |
| H  | -2.340974 | 4.753875  | -1.600318 |
| C  | -4.577320 | 2.141471  | 1.030400  |
| H  | -4.070726 | 2.045242  | 1.997574  |
| H  | -5.185077 | 3.060174  | 1.044516  |
| H  | -5.249043 | 1.280209  | 0.897916  |
| C  | 0.654942  | -0.217074 | 2.846848  |
| C  | 1.875520  | -0.706161 | 3.379774  |
| C  | 0.053671  | 0.926467  | 3.428941  |
| C  | 2.445280  | -0.080260 | 4.497174  |
| C  | 0.648882  | 1.534107  | 4.543369  |
| C  | 1.838858  | 1.034367  | 5.082258  |
| H  | -2.944203 | -0.740251 | 1.546076  |
| H  | -4.910134 | -0.548827 | 3.012622  |
| C  | -2.961106 | -1.288795 | 2.477026  |
| C  | -4.079300 | -1.176760 | 3.307217  |
| C  | -1.871451 | -2.098062 | 2.850371  |
| C  | -4.124753 | -1.872172 | 4.517146  |
| H  | -4.991145 | -1.783983 | 5.159753  |
| C  | -1.930463 | -2.795672 | 4.070551  |
| C  | -3.051889 | -2.681490 | 4.897847  |
| H  | -1.107574 | -3.424456 | 4.386857  |
| H  | -3.088098 | -3.219778 | 5.836118  |
| C  | 2.986661  | 1.187841  | 0.310112  |
| H  | 2.902341  | 0.775173  | 1.328838  |
| C  | 3.669068  | 2.541465  | 0.362068  |
| H  | 3.143826  | 3.281624  | 0.987121  |
| H  | 4.692311  | 2.467837  | 0.778478  |

|   |           |           |           |
|---|-----------|-----------|-----------|
| H | 3.780428  | 2.991999  | -0.635866 |
| B | 3.758606  | 0.192946  | -0.575148 |
| O | 4.209639  | -1.044653 | -0.159796 |
| O | 4.198012  | 0.481001  | -1.860120 |
| C | 5.309783  | -0.397048 | -2.139259 |
| C | 5.020287  | -1.626919 | -1.206558 |
| C | 5.340777  | -0.724058 | -3.616274 |
| H | 4.404227  | -1.178425 | -3.961684 |
| H | 5.510942  | 0.188395  | -4.203811 |
| H | 6.158461  | -1.423289 | -3.843355 |
| C | 6.569085  | 0.360457  | -1.742160 |
| H | 6.563577  | 0.617481  | -0.673167 |
| H | 7.482427  | -0.212227 | -1.953544 |
| H | 6.620571  | 1.300117  | -2.308574 |
| C | 6.255225  | -2.233518 | -0.570128 |
| H | 6.946892  | -2.612333 | -1.336440 |
| H | 6.794899  | -1.512123 | 0.054869  |
| H | 5.970806  | -3.080560 | 0.068865  |
| C | 4.210817  | -2.719001 | -1.882290 |
| H | 3.908511  | -3.459643 | -1.131384 |
| H | 3.303473  | -2.331304 | -2.362850 |
| H | 4.800365  | -3.243155 | -2.647083 |
| C | 2.621655  | -1.863145 | 2.769401  |
| H | 3.685522  | -1.583448 | 2.617004  |
| H | 2.575041  | -2.737674 | 3.451287  |
| H | 2.220137  | -2.153447 | 1.780708  |
| C | -1.229682 | 1.516632  | 2.913084  |
| H | -1.111450 | 2.610781  | 2.773721  |
| H | -1.530623 | 1.090391  | 1.938747  |
| H | -2.040774 | 1.339041  | 3.649832  |
| C | 2.476045  | 1.686310  | 6.274213  |
| H | 2.551439  | 0.952775  | 7.104379  |
| H | 3.494910  | 2.037535  | 6.006754  |
| H | 1.885732  | 2.558116  | 6.628370  |
| H | 3.375343  | -0.456880 | 4.908045  |
| H | 0.179217  | 2.401798  | 4.992430  |

123

Figure\_S9\_imid-2\_modeC\_prod(AS) / electronic energy: -4442.820902045555 a.u. / lowest freq: -8.85 cm-1

|    |           |           |           |
|----|-----------|-----------|-----------|
| C  | 3.402455  | -0.485734 | 0.332176  |
| H  | 3.739729  | 0.507364  | 0.663059  |
| C  | 3.291274  | -0.628636 | -1.201593 |
| H  | 3.609784  | -1.629799 | -1.531092 |
| C  | 1.129063  | -0.605560 | -0.268033 |
| C  | 1.560851  | -0.685840 | 2.114176  |
| C  | 0.929008  | -1.853963 | 2.547783  |
| C  | 1.736272  | 0.386529  | 3.007618  |
| C  | 0.488220  | -1.974136 | 3.862267  |
| H  | 0.789107  | -2.672883 | 1.838853  |
| C  | 1.287554  | 0.252926  | 4.322375  |
| C  | 0.674559  | -0.921310 | 4.754678  |
| H  | 0.006949  | -2.899488 | 4.185266  |
| H  | 1.409242  | 1.101451  | 4.997938  |
| H  | 0.334571  | -1.006258 | 5.788836  |
| S  | 2.475246  | 1.964384  | 2.540015  |
| O  | 1.959517  | 2.943095  | 3.536226  |
| O  | 1.931568  | 2.268059  | 1.181032  |
| O  | 3.933724  | 1.757700  | 2.577053  |
| Cu | -0.868637 | -0.638715 | -0.128516 |
| C  | 4.274902  | -1.544275 | 0.958442  |
| C  | 5.467238  | -1.183578 | 1.610157  |
| C  | 3.910107  | -2.903182 | 0.904699  |
| C  | 6.274262  | -2.161340 | 2.199631  |
| H  | 5.776623  | -0.147364 | 1.659213  |
| C  | 4.719631  | -3.876664 | 1.496313  |
| H  | 2.996551  | -3.207495 | 0.410311  |
| C  | 5.900547  | -3.506237 | 2.143719  |
| H  | 7.190799  | -1.875934 | 2.699561  |
| H  | 4.430655  | -4.918794 | 1.453286  |
| H  | 6.526602  | -4.261352 | 2.601159  |
| N  | 1.984626  | -0.638491 | 0.756478  |
| N  | 1.831336  | -0.499864 | -1.404024 |
| C  | -2.865418 | 0.065355  | -0.082938 |
| C  | -3.696841 | 0.012607  | -1.278190 |
| C  | -4.949944 | -0.625152 | -1.238672 |
| C  | -3.272776 | 0.577330  | -2.496078 |
| C  | -5.750701 | -0.685656 | -2.374175 |
| C  | -4.070696 | 0.511039  | -3.631518 |
| C  | -5.314103 | -0.122123 | -3.575149 |
| H  | -6.724358 | -1.178498 | -2.324514 |
| H  | -3.717066 | 0.947297  | -4.568399 |
| H  | -5.942376 | -0.176594 | -4.466926 |
| C  | -1.950115 | 1.129413  | 0.174349  |
| C  | -1.050196 | 1.071670  | 1.216457  |
| H  | -1.194185 | 0.378475  | 2.056707  |
| H  | -0.248113 | 1.804928  | 1.305247  |
| H  | -2.293879 | 1.057011  | -2.556200 |
| H  | -1.802018 | 1.920104  | -0.570509 |
| P  | -2.091930 | 4.475598  | 1.144516  |

|    |           |           |           |
|----|-----------|-----------|-----------|
| O  | -2.665257 | 5.995673  | 0.876581  |
| O  | -1.065694 | 4.213181  | 0.065258  |
| O  | -3.454237 | 3.573833  | 0.924899  |
| O  | -1.670460 | 4.293358  | 2.583245  |
| Na | 0.632512  | 4.203104  | 1.891444  |
| H  | -3.240984 | -0.492067 | 0.784096  |
| H  | -5.286827 | -1.076840 | -0.303704 |
| C  | -3.594376 | 6.519742  | 1.801329  |
| H  | -3.803412 | 7.560311  | 1.523407  |
| H  | -4.543696 | 5.958265  | 1.789863  |
| H  | -3.199612 | 6.499354  | 2.829013  |
| C  | -4.099867 | 3.644116  | -0.329149 |
| H  | -4.776392 | 2.782850  | -0.417763 |
| H  | -4.693574 | 4.567547  | -0.428894 |
| H  | -3.379405 | 3.613747  | -1.164239 |
| C  | 1.213558  | -0.523947 | -2.680416 |
| C  | 1.206456  | -1.709835 | -3.459625 |
| C  | 0.658634  | 0.664468  | -3.220214 |
| C  | 0.680100  | -1.682012 | -4.759181 |
| C  | 0.127093  | 0.656889  | -4.517170 |
| C  | 0.134593  | -0.509406 | -5.288350 |
| H  | 3.234021  | 2.131675  | -1.002395 |
| H  | 4.508871  | 3.765855  | -2.319946 |
| C  | 3.918683  | 1.774319  | -1.754688 |
| C  | 4.642462  | 2.707363  | -2.502082 |
| C  | 4.079815  | 0.395451  | -1.982195 |
| C  | 5.536156  | 2.276320  | -3.484173 |
| H  | 6.095391  | 3.000169  | -4.062691 |
| C  | 4.985060  | -0.025737 | -2.974645 |
| C  | 5.707658  | 0.910821  | -3.719740 |
| H  | 5.129353  | -1.079356 | -3.179091 |
| H  | 6.399675  | 0.577106  | -4.482104 |
| C  | -1.332225 | -2.462434 | -0.894822 |
| H  | -0.315984 | -2.879268 | -0.878233 |
| C  | -1.944783 | -2.461842 | -2.271421 |
| H  | -1.585178 | -1.658544 | -2.936264 |
| H  | -1.726789 | -3.406500 | -2.798422 |
| H  | -3.037459 | -2.363549 | -2.237406 |
| B  | -2.202668 | -3.003072 | 0.259903  |
| O  | -1.714408 | -3.391288 | 1.491274  |
| O  | -3.570891 | -3.141709 | 0.176650  |
| C  | -3.997821 | -3.916606 | 1.323825  |
| C  | -2.855197 | -3.636315 | 2.355947  |
| C  | -5.369472 | -3.447443 | 1.756125  |
| H  | -5.394676 | -2.370425 | 1.961831  |
| H  | -6.105732 | -3.656374 | 0.968147  |
| H  | -5.694210 | -3.975940 | 2.663720  |
| C  | -4.045498 | -5.370796 | 0.883331  |
| H  | -3.055037 | -5.730440 | 0.571027  |
| H  | -4.411826 | -6.027936 | 1.683677  |
| H  | -4.724431 | -5.471605 | 0.026258  |
| C  | -2.541024 | -4.798581 | 3.271473  |
| H  | -3.425645 | -5.080045 | 3.860344  |
| H  | -2.204973 | -5.680055 | 2.712711  |
| H  | -1.747497 | -4.526840 | 3.980277  |
| C  | -3.091203 | -2.370339 | 3.161827  |
| H  | -2.174103 | -2.093294 | 3.698054  |
| H  | -3.367382 | -1.522785 | 2.518992  |
| H  | -3.891191 | -2.500860 | 3.903000  |
| C  | 1.711249  | -3.030080 | -2.939811 |
| H  | 0.969272  | -3.827513 | -3.157303 |
| H  | 2.668817  | -3.284593 | -3.440189 |
| H  | 1.861833  | -3.027788 | -1.843702 |
| C  | 0.648171  | 1.969814  | -2.468501 |
| H  | -0.360160 | 2.428529  | -2.515723 |
| H  | 0.905246  | 1.851576  | -1.399401 |
| H  | 1.369791  | 2.670626  | -2.937361 |
| C  | -0.445100 | -0.518384 | -6.672226 |
| H  | 0.339653  | -0.804993 | -7.403573 |
| H  | -1.275328 | -1.254031 | -6.723119 |
| H  | -0.842849 | 0.479244  | -6.955969 |
| H  | 0.675632  | -2.586722 | -5.356721 |
| H  | -0.292915 | 1.568301  | -4.926985 |

123

Figure\_S9\_imid-2\_modeD\_ed(AS) / electronic energy: -4442.828215219654 a.u. / lowest freq: -8.44 cm<sup>-1</sup>

|   |          |           |           |
|---|----------|-----------|-----------|
| C | 2.971778 | 1.141990  | -0.472217 |
| H | 3.449087 | 0.537108  | 0.311195  |
| C | 2.332548 | 2.441744  | 0.053252  |
| H | 2.454098 | 3.265587  | -0.670072 |
| C | 0.611993 | 0.934843  | -0.521837 |
| C | 1.805220 | -0.775236 | -1.741279 |
| C | 1.138687 | -0.723265 | -2.973856 |
| C | 2.482946 | -1.952667 | -1.382576 |
| C | 1.194093 | -1.790314 | -3.863835 |
| H | 0.598387 | 0.192033  | -3.230009 |
| C | 2.537553 | -3.018479 | -2.286131 |
| C | 1.917038 | -2.934572 | -3.529105 |
| H | 0.675530 | -1.722738 | -4.822838 |

|    |           |           |           |
|----|-----------|-----------|-----------|
| H  | 3.067379  | -3.923734 | -1.983457 |
| H  | 1.979060  | -3.773247 | -4.226050 |
| S  | 3.303558  | -2.176953 | 0.198805  |
| O  | 3.347747  | -3.654142 | 0.411475  |
| O  | 2.431389  | -1.532492 | 1.228861  |
| O  | 4.634492  | -1.557441 | 0.058686  |
| Cu | -1.086315 | -0.055861 | -0.877214 |
| C  | 3.970386  | 1.391135  | -1.576717 |
| C  | 5.345315  | 1.231615  | -1.328588 |
| C  | 3.554114  | 1.817331  | -2.852151 |
| C  | 6.280025  | 1.469182  | -2.340593 |
| H  | 5.696717  | 0.932984  | -0.349139 |
| C  | 4.491920  | 2.052327  | -3.861358 |
| H  | 2.505646  | 1.961177  | -3.069543 |
| C  | 5.853695  | 1.876126  | -3.606779 |
| H  | 7.336179  | 1.341397  | -2.141482 |
| H  | 4.162325  | 2.372760  | -4.841201 |
| H  | 6.578820  | 2.059784  | -4.388986 |
| N  | 1.774358  | 0.396120  | -0.939357 |
| N  | 0.899889  | 2.073437  | 0.133006  |
| C  | -2.104351 | -1.773652 | -0.451624 |
| C  | -2.341010 | -2.606203 | -1.631486 |
| C  | -3.648894 | -2.737950 | -2.135485 |
| C  | -1.311241 | -3.306664 | -2.283797 |
| C  | -3.914156 | -3.531083 | -3.247410 |
| C  | -1.575231 | -4.091692 | -3.402298 |
| C  | -2.877800 | -4.210576 | -3.891650 |
| H  | -4.938121 | -3.615349 | -3.620449 |
| H  | -0.753324 | -4.617510 | -3.896641 |
| H  | -3.084239 | -4.829866 | -4.767727 |
| C  | -0.904481 | -1.714589 | 0.291939  |
| C  | -0.939185 | -1.375802 | 1.732223  |
| H  | 0.051519  | -1.092745 | 2.113239  |
| H  | -1.656902 | -0.575934 | 1.957361  |
| H  | -0.285768 | -3.230487 | -1.912029 |
| H  | -0.027838 | -2.290156 | -0.030798 |
| P  | -0.392009 | -3.539784 | 3.151607  |
| O  | 0.330417  | -4.317698 | 1.926078  |
| O  | 0.715946  | -3.030820 | 4.009225  |
| O  | -1.432511 | -4.558704 | 3.813380  |
| O  | -1.434902 | -2.514852 | 2.541665  |
| Na | 2.644713  | -3.471224 | 2.709145  |
| H  | -3.020231 | -1.438508 | 0.049234  |
| H  | -4.455177 | -2.179944 | -1.650342 |
| C  | -0.411818 | -4.987048 | 0.906464  |
| H  | 0.253800  | -5.093028 | 0.042207  |
| H  | -0.727278 | -5.981455 | 1.251508  |
| H  | -1.295881 | -4.404472 | 0.609106  |
| C  | -0.948413 | -5.590696 | 4.672740  |
| H  | -1.823913 | -6.127330 | 5.049600  |
| H  | -0.306158 | -6.294868 | 4.124045  |
| H  | -0.387559 | -5.169320 | 5.517296  |
| C  | -0.095958 | 3.051938  | 0.397636  |
| C  | -0.410191 | 4.046648  | -0.567324 |
| C  | -0.688630 | 3.127151  | 1.681937  |
| C  | -1.262714 | 5.105125  | -0.222361 |
| C  | -1.524935 | 4.205003  | 2.001825  |
| C  | -1.812610 | 5.195081  | 1.059596  |
| H  | 2.502997  | 1.014041  | 2.414825  |
| H  | 3.366867  | 1.787253  | 4.583441  |
| C  | 2.881545  | 2.023511  | 2.499588  |
| C  | 3.370710  | 2.458326  | 3.734299  |
| C  | 2.877318  | 2.888117  | 1.388244  |
| C  | 3.862028  | 3.757756  | 3.874651  |
| H  | 4.239610  | 4.093168  | 4.831892  |
| C  | 3.376827  | 4.194419  | 1.542510  |
| C  | 3.865673  | 4.624532  | 2.779674  |
| H  | 3.383897  | 4.884575  | 0.708069  |
| H  | 4.245926  | 5.631867  | 2.889762  |
| C  | -2.224619 | 1.006074  | -2.203903 |
| H  | -1.598505 | 1.898245  | -2.343110 |
| C  | -2.530233 | 0.321619  | -3.517678 |
| H  | -3.205597 | -0.537382 | -3.392901 |
| H  | -3.027589 | 0.992439  | -4.244604 |
| H  | -1.636001 | -0.067493 | -4.038993 |
| B  | -3.353448 | 1.240465  | -1.217158 |
| O  | -4.593292 | 0.599993  | -1.247253 |
| O  | -3.285230 | 2.115237  | -0.124151 |
| C  | -4.629605 | 2.312334  | 0.347121  |
| C  | -5.328522 | 0.977850  | -0.070108 |
| C  | -4.635452 | 2.559608  | 1.841169  |
| H  | -4.022873 | 1.826586  | 2.380203  |
| H  | -4.250013 | 3.558775  | 2.075907  |
| H  | -5.660341 | 2.509323  | 2.237122  |
| C  | -5.192111 | 3.519291  | -0.390122 |
| H  | -5.244460 | 3.338670  | -1.473115 |
| H  | -6.197473 | 3.789614  | -0.037424 |
| H  | -4.532077 | 4.381934  | -0.228800 |

|   |           |           |           |
|---|-----------|-----------|-----------|
| C | -6.793177 | 1.120887  | -0.428559 |
| H | -7.371384 | 1.512538  | 0.421347  |
| H | -6.938821 | 1.793179  | -1.282993 |
| H | -7.217316 | 0.143017  | -0.696221 |
| C | -5.150718 | -0.112384 | 0.976512  |
| H | -5.436104 | -1.085950 | 0.553569  |
| H | -4.107448 | -0.178139 | 1.314550  |
| H | -5.776143 | 0.065063  | 1.862583  |
| C | 0.148801  | 4.033990  | -1.965535 |
| H | 0.629855  | 3.072643  | -2.221187 |
| H | -0.669492 | 4.193374  | -2.699320 |
| H | 0.891194  | 4.851767  | -2.076342 |
| C | -0.445658 | 2.093985  | 2.745469  |
| H | 0.083065  | 2.559419  | 3.603600  |
| H | -1.417070 | 1.688457  | 3.098576  |
| H | 0.157915  | 1.246495  | 2.376397  |
| C | -2.704811 | 6.342605  | 1.433930  |
| H | -3.701358 | 5.961048  | 1.738850  |
| H | -2.256586 | 6.900977  | 2.282491  |
| H | -2.844511 | 7.045724  | 0.585486  |
| H | -1.490942 | 5.868169  | -0.957677 |
| H | -1.957928 | 4.272405  | 2.993604  |

123

Figure\_S9\_imid-2\_modeD\_ts(AS)\_01 / electronic energy: -4442.816117249291 a.u. / lowest freq: -255.52 cm-1

|    |           |           |           |
|----|-----------|-----------|-----------|
| C  | 3.177446  | 0.452157  | -0.478116 |
| H  | 3.482463  | -0.268670 | 0.294640  |
| C  | 2.857053  | 1.857116  | 0.068613  |
| H  | 3.157163  | 2.641563  | -0.646313 |
| C  | 0.842113  | 0.802781  | -0.529621 |
| C  | 1.593242  | -1.100163 | -1.808297 |
| C  | 0.982072  | -0.849286 | -3.044519 |
| C  | 1.939008  | -2.419111 | -1.471288 |
| C  | 0.771278  | -1.874973 | -3.960446 |
| H  | 0.701397  | 0.180524  | -3.281134 |
| C  | 1.730840  | -3.441952 | -2.401584 |
| C  | 1.170476  | -3.173145 | -3.647111 |
| H  | 0.301514  | -1.655425 | -4.921763 |
| H  | 2.003877  | -4.460071 | -2.117852 |
| H  | 1.024312  | -3.983916 | -4.363980 |
| S  | 2.645376  | -2.868489 | 0.117227  |
| O  | 2.335467  | -4.317162 | 0.289139  |
| O  | 1.922106  | -2.052965 | 1.139914  |
| O  | 4.085742  | -2.571536 | 0.014447  |
| Cu | -1.022472 | 0.172432  | -0.876329 |
| C  | 4.219765  | 0.474469  | -1.569460 |
| C  | 5.504502  | -0.042279 | -1.324731 |
| C  | 3.939575  | 1.032022  | -2.831368 |
| C  | 6.479056  | -0.021464 | -2.326831 |
| H  | 5.756999  | -0.454015 | -0.355863 |
| C  | 4.916480  | 1.049582  | -3.830632 |
| H  | 2.965036  | 1.446281  | -3.045948 |
| C  | 6.184631  | 0.521364  | -3.579544 |
| H  | 7.464565  | -0.423547 | -2.130538 |
| H  | 4.690078  | 1.474079  | -4.800147 |
| H  | 6.940431  | 0.536646  | -4.354091 |
| N  | 1.842486  | 0.023546  | -0.973235 |
| N  | 1.377523  | 1.825349  | 0.155254  |
| C  | -2.463729 | -1.240897 | -0.565842 |
| C  | -2.912628 | -2.010055 | -1.722524 |
| C  | -4.232529 | -1.860241 | -2.189129 |
| C  | -2.068524 | -2.907387 | -2.400360 |
| C  | -4.687699 | -2.578510 | -3.290546 |
| C  | -2.521735 | -3.617695 | -3.506760 |
| C  | -3.834042 | -3.458822 | -3.957840 |
| H  | -5.716223 | -2.446957 | -3.635348 |
| H  | -1.844620 | -4.304391 | -4.021812 |
| H  | -4.189043 | -4.020055 | -4.825205 |
| C  | -1.309949 | -1.555318 | 0.211214  |
| C  | -1.108030 | -1.008410 | 1.490875  |
| H  | -0.119425 | -1.111905 | 1.941865  |
| H  | -1.687635 | -0.134707 | 1.794516  |
| H  | -1.037972 | -3.042470 | -2.062351 |
| H  | -0.609474 | -2.334528 | -0.110165 |
| P  | -1.239587 | -3.273968 | 3.290550  |
| O  | -0.816250 | -4.224961 | 2.008976  |
| O  | 0.062943  | -3.098303 | 4.016482  |
| O  | -2.337701 | -4.149456 | 4.102758  |
| O  | -2.061657 | -2.078024 | 2.786545  |
| Na | 1.593093  | -4.038912 | 2.590066  |
| H  | -3.256237 | -0.677323 | -0.060982 |
| H  | -4.891982 | -1.149149 | -1.683817 |
| C  | -1.800952 | -4.703776 | 1.106810  |
| H  | -1.297834 | -4.966059 | 0.167173  |
| H  | -2.299755 | -5.599471 | 1.507273  |
| H  | -2.563570 | -3.937311 | 0.901119  |
| C  | -1.892372 | -5.255465 | 4.872979  |
| H  | -2.766104 | -5.671302 | 5.386367  |
| H  | -1.452606 | -6.039926 | 4.236885  |



|   |           |           |           |
|---|-----------|-----------|-----------|
| H | -1.147840 | -4.949246 | 5.621394  |
| C | 0.628230  | 2.997860  | 0.442924  |
| C | 0.522690  | 4.044612  | -0.512558 |
| C | 0.078531  | 3.186293  | 1.734764  |
| C | -0.084068 | 5.256123  | -0.151930 |
| C | -0.507838 | 4.413943  | 2.070251  |
| C | -0.590166 | 5.449587  | 1.136659  |
| H | 2.731658  | 0.384921  | 2.407353  |
| H | 3.762338  | 0.914743  | 4.576027  |
| C | 3.321978  | 1.286252  | 2.501901  |
| C | 3.905002  | 1.583093  | 3.736793  |
| C | 3.496774  | 2.149876  | 1.403490  |
| C | 4.669098  | 2.741652  | 3.890225  |
| H | 5.118998  | 2.970479  | 4.847617  |
| C | 4.270650  | 3.313030  | 1.570931  |
| C | 4.852215  | 3.605244  | 2.808172  |
| H | 4.420385  | 3.999381  | 0.746808  |
| H | 5.443825  | 4.503575  | 2.928387  |
| C | -1.897865 | 1.437746  | -2.207592 |
| H | -1.071343 | 2.149544  | -2.338064 |
| C | -2.337271 | 0.835794  | -3.517633 |
| H | -3.162722 | 0.120932  | -3.395341 |
| H | -2.703906 | 1.604736  | -4.222869 |
| H | -1.532201 | 0.300494  | -4.050329 |
| B | -2.956731 | 1.929388  | -1.220662 |
| O | -4.300533 | 1.590499  | -1.280772 |
| O | -2.693575 | 2.752474  | -0.128197 |
| C | -3.966822 | 3.245027  | 0.345726  |
| C | -4.950126 | 2.112718  | -0.102641 |
| C | -3.919762 | 3.454962  | 1.843514  |
| H | -3.511234 | 2.583029  | 2.368858  |
| H | -3.300753 | 4.322998  | 2.097857  |
| H | -4.927311 | 3.651786  | 2.237477  |
| C | -4.227801 | 4.562231  | -0.368693 |
| H | -4.301850 | 4.422426  | -1.456357 |
| H | -5.152482 | 5.041997  | -0.019396 |
| H | -3.395645 | 5.252297  | -0.178137 |
| C | -6.335286 | 2.593274  | -0.480513 |
| H | -6.820198 | 3.102206  | 0.365135  |
| H | -6.310572 | 3.284597  | -1.331350 |
| H | -6.968446 | 1.740573  | -0.761815 |
| C | -5.048890 | 0.995474  | 0.924380  |
| H | -5.544950 | 0.122033  | 0.478845  |
| H | -4.060115 | 0.681238  | 1.285502  |
| H | -5.637423 | 1.299584  | 1.800807  |
| C | 1.052147  | 3.927238  | -1.917480 |
| H | 1.336014  | 2.892905  | -2.181664 |
| H | 0.271302  | 4.245454  | -2.640380 |
| H | 1.937952  | 4.585537  | -2.036626 |
| C | 0.103242  | 2.114843  | 2.788258  |
| H | 0.726440  | 2.448353  | 3.644382  |
| H | -0.929665 | 1.923533  | 3.148055  |
| H | 0.507451  | 1.160295  | 2.408073  |
| C | -1.219662 | 6.755143  | 1.526702  |
| H | -2.270806 | 6.587111  | 1.840878  |
| H | -0.656493 | 7.201722  | 2.372944  |
| H | -1.218300 | 7.477991  | 0.683338  |
| H | -0.154130 | 6.055810  | -0.880390 |
| H | -0.908699 | 4.562822  | 3.066657  |

123

Figure\_S9\_imid-2\_modeD\_ts(AS)\_02 / electronic energy: -4442.816120685304 a.u. / lowest freq: -265.70 cm-1

|    |           |           |           |
|----|-----------|-----------|-----------|
| C  | 3.061736  | 0.475909  | -0.821852 |
| H  | 3.480885  | 0.298755  | 0.178481  |
| C  | 2.431650  | 1.870919  | -0.998435 |
| H  | 2.610939  | 2.263945  | -2.013414 |
| C  | 0.707446  | 0.271730  | -0.911672 |
| C  | 1.903946  | -1.814665 | -1.115402 |
| C  | 1.289688  | -2.345273 | -2.258981 |
| C  | 2.526785  | -2.686027 | -0.206307 |
| C  | 1.332414  | -3.709581 | -2.527154 |
| H  | 0.799661  | -1.654603 | -2.950670 |
| C  | 2.573898  | -4.053719 | -0.491686 |
| C  | 1.997533  | -4.565145 | -1.650612 |
| H  | 0.852095  | -4.100603 | -3.426785 |
| H  | 3.057001  | -4.714436 | 0.230124  |
| H  | 2.048966  | -5.636527 | -1.855979 |
| S  | 3.248218  | -2.137001 | 1.346407  |
| O  | 3.248158  | -3.349823 | 2.216967  |
| O  | 2.307882  | -1.109421 | 1.889363  |
| O  | 4.591194  | -1.627718 | 1.022805  |
| Cu | -0.968166 | -0.824533 | -0.829428 |
| C  | 4.123909  | 0.181567  | -1.853155 |
| C  | 5.479165  | 0.166995  | -1.478237 |
| C  | 3.788382  | -0.048979 | -3.200718 |
| C  | 6.473448  | -0.096535 | -2.424919 |
| H  | 5.769148  | 0.368538  | -0.454840 |
| C  | 4.785561  | -0.313368 | -4.143603 |
| H  | 2.757295  | -0.033214 | -3.522122 |

|    |           |           |           |
|----|-----------|-----------|-----------|
| C  | 6.126915  | -0.339527 | -3.755847 |
| H  | 7.513838  | -0.108524 | -2.126793 |
| H  | 4.517818  | -0.497119 | -5.176054 |
| H  | 6.898029  | -0.543366 | -4.487435 |
| N  | 1.869722  | -0.402073 | -0.959818 |
| N  | 0.985773  | 1.584125  | -0.844341 |
| C  | -2.140284 | -2.150097 | 0.207961  |
| C  | -2.403092 | -3.452795 | -0.397089 |
| C  | -3.711204 | -3.775123 | -0.804446 |
| C  | -1.392565 | -4.410499 | -0.596160 |
| C  | -3.996970 | -5.005220 | -1.388003 |
| C  | -1.677270 | -5.636261 | -1.188435 |
| C  | -2.980800 | -5.941956 | -1.586368 |
| H  | -5.020018 | -5.234146 | -1.696151 |
| H  | -0.873668 | -6.361943 | -1.340072 |
| H  | -3.202355 | -6.906172 | -2.049710 |
| C  | -0.968559 | -1.833623 | 0.980570  |
| C  | -0.886272 | -0.623306 | 1.694067  |
| H  | 0.105678  | -0.307917 | 2.019854  |
| H  | -1.593461 | 0.180176  | 1.476702  |
| H  | -0.365937 | -4.186582 | -0.295349 |
| H  | -0.171315 | -2.556787 | 1.086711  |
| P  | -0.733747 | -0.346244 | 4.585247  |
| O  | -1.664352 | -0.136378 | 5.900076  |
| O  | 0.474951  | -1.127981 | 5.012025  |
| O  | -0.333599 | 1.168831  | 4.125735  |
| O  | -1.642311 | -0.847641 | 3.445946  |
| Na | 1.912656  | -2.420941 | 3.934780  |
| H  | -3.036033 | -1.543015 | 0.378014  |
| H  | -4.501062 | -3.030230 | -0.674817 |
| C  | -2.883092 | 0.577522  | 5.771590  |
| H  | -3.311953 | 0.683187  | 6.774409  |
| H  | -2.718973 | 1.580858  | 5.348690  |
| H  | -3.596575 | 0.039358  | 5.130829  |
| C  | 0.708241  | 1.845983  | 4.803456  |
| H  | 0.743665  | 2.870740  | 4.415845  |
| H  | 0.528873  | 1.888657  | 5.889312  |
| H  | 1.682281  | 1.365470  | 4.627563  |
| C  | 0.008536  | 2.572746  | -1.142331 |
| C  | -0.246686 | 2.958385  | -2.486628 |
| C  | -0.622610 | 3.283814  | -0.091746 |
| C  | -1.091224 | 4.046512  | -2.749825 |
| C  | -1.446277 | 4.378154  | -0.386098 |
| C  | -1.684625 | 4.763101  | -1.706815 |
| H  | 2.483262  | 1.687743  | 1.764322  |
| H  | 3.249440  | 3.383346  | 3.370159  |
| C  | 2.864468  | 2.628597  | 1.391233  |
| C  | 3.296768  | 3.589751  | 2.308839  |
| C  | 2.916823  | 2.886855  | 0.007351  |
| C  | 3.787016  | 4.817048  | 1.858681  |
| H  | 4.119994  | 5.560897  | 2.570834  |
| C  | 3.415836  | 4.126597  | -0.432725 |
| C  | 3.847275  | 5.084706  | 0.489408  |
| H  | 3.465278  | 4.357653  | -1.489516 |
| H  | 4.226655  | 6.036834  | 0.141603  |
| C  | -2.034704 | -0.528189 | -2.533781 |
| H  | -1.359763 | 0.174973  | -3.039752 |
| C  | -2.315463 | -1.745331 | -3.379205 |
| H  | -3.014012 | -2.442370 | -2.895098 |
| H  | -2.777998 | -1.477863 | -4.347571 |
| H  | -1.411640 | -2.327101 | -3.631613 |
| B  | -3.195742 | 0.167475  | -1.824600 |
| O  | -4.444730 | -0.403132 | -1.623150 |
| O  | -3.133035 | 1.443180  | -1.265973 |
| C  | -4.493474 | 1.856032  | -1.007808 |
| C  | -5.223181 | 0.489827  | -0.799688 |
| C  | -4.546643 | 2.764951  | 0.200782  |
| H  | -3.988627 | 2.352280  | 1.050126  |
| H  | -4.130190 | 3.752144  | -0.031646 |
| H  | -5.587898 | 2.922541  | 0.517513  |
| C  | -4.976256 | 2.592274  | -2.248769 |
| H  | -4.984678 | 1.934384  | -3.129139 |
| H  | -5.986638 | 3.003556  | -2.116845 |
| H  | -4.296611 | 3.426268  | -2.465274 |
| C  | -6.660955 | 0.464388  | -1.274551 |
| H  | -7.261249 | 1.223339  | -0.752106 |
| H  | -6.739174 | 0.644822  | -2.353451 |
| H  | -7.112111 | -0.515895 | -1.067768 |
| C  | -5.144418 | 0.006909  | 0.641245  |
| H  | -5.448061 | -1.047460 | 0.699485  |
| H  | -4.128893 | 0.093942  | 1.052363  |
| H  | -5.812646 | 0.581884  | 1.296957  |
| C  | 0.371997  | 2.261973  | -3.669799 |
| H  | 0.864564  | 1.312466  | -3.395800 |
| H  | -0.413956 | 2.019048  | -4.416001 |
| H  | 1.119767  | 2.930809  | -4.144797 |
| C  | -0.438502 | 2.923718  | 1.354569  |
| H  | 0.061281  | 3.759889  | 1.887028  |

|   |           |          |           |
|---|-----------|----------|-----------|
| H | -1.429146 | 2.740283 | 1.821242  |
| H | 0.167581  | 2.011349 | 1.485123  |
| C | -2.572475 | 5.939651 | -1.989579 |
| H | -3.581988 | 5.758769 | -1.564682 |
| H | -2.142346 | 6.850970 | -1.523550 |
| H | -2.678732 | 6.119075 | -3.080591 |
| H | -1.277523 | 4.341873 | -3.776043 |
| H | -1.910459 | 4.933078 | 0.421570  |

123

Figure\_S9\_imid-2\_modeD\_ts(AS)\_03 / electronic energy: -4442.807707406971 a.u. / lowest freq: -260.34 cm-1

|    |           |           |           |
|----|-----------|-----------|-----------|
| C  | -1.148180 | 1.888501  | 1.639143  |
| H  | -2.122668 | 1.500986  | 1.962270  |
| C  | -1.208167 | 2.745741  | 0.356959  |
| H  | -0.604436 | 3.661734  | 0.459922  |
| C  | -0.020165 | 0.757510  | -0.122950 |
| C  | 0.187340  | -0.286455 | 2.044282  |
| C  | 1.557921  | -0.565425 | 1.932674  |
| C  | -0.585050 | -1.043142 | 2.947253  |
| C  | 2.162193  | -1.561677 | 2.687895  |
| H  | 2.158025  | 0.020507  | 1.232672  |
| C  | 0.040922  | -2.027553 | 3.719627  |
| C  | 1.402008  | -2.290124 | 3.599946  |
| H  | 3.225472  | -1.765021 | 2.547683  |
| H  | -0.577107 | -2.607311 | 4.406458  |
| H  | 1.861559  | -3.071145 | 4.209485  |
| S  | -2.365840 | -0.868463 | 3.161869  |
| O  | -2.800018 | -2.123704 | 3.843062  |
| O  | -2.941872 | -0.804622 | 1.782033  |
| O  | -2.571183 | 0.347723  | 3.965773  |
| Cu | 0.993657  | -0.811070 | -0.919448 |
| C  | -0.520122 | 2.635358  | 2.791684  |
| C  | -1.334991 | 3.189119  | 3.794778  |
| C  | 0.870268  | 2.842292  | 2.854574  |
| C  | -0.767430 | 3.902632  | 4.854794  |
| H  | -2.411091 | 3.076620  | 3.752937  |
| C  | 1.434368  | 3.554977  | 3.915718  |
| H  | 1.517848  | 2.450013  | 2.086351  |
| C  | 0.616437  | 4.082093  | 4.917431  |
| H  | -1.401781 | 4.321208  | 5.625372  |
| H  | 2.506003  | 3.701176  | 3.958911  |
| H  | 1.054040  | 4.635551  | 5.738135  |
| N  | -0.321876 | 0.731360  | 1.194980  |
| N  | -0.575487 | 1.860359  | -0.643790 |
| C  | 1.015908  | -2.874283 | -1.225722 |
| C  | 2.255064  | -3.569132 | -0.883977 |
| C  | 3.194117  | -3.861933 | -1.892084 |
| C  | 2.569009  | -3.945282 | 0.434716  |
| C  | 4.416540  | -4.452281 | -1.586619 |
| C  | 3.791077  | -4.531973 | 0.740925  |
| C  | 4.728360  | -4.776823 | -0.265550 |
| H  | 5.132101  | -4.660792 | -2.385649 |
| H  | 4.013536  | -4.805655 | 1.775927  |
| H  | 5.690607  | -5.234411 | -0.023592 |
| C  | -0.024570 | -2.570830 | -0.317177 |
| C  | -1.266586 | -2.056286 | -0.739690 |
| H  | -1.882687 | -1.509501 | -0.022699 |
| H  | -1.371246 | -1.767250 | -1.786779 |
| H  | 1.845555  | -3.774963 | 1.233550  |
| H  | 0.108473  | -2.773810 | 0.750574  |
| P  | -3.979666 | -3.220211 | -1.062491 |
| O  | -4.597590 | -4.211827 | -2.195983 |
| O  | -4.895979 | -3.295583 | 0.124092  |
| O  | -4.014385 | -1.745894 | -1.763756 |
| O  | -2.476330 | -3.528753 | -0.924282 |
| Na | -4.335777 | -2.826685 | 2.214771  |
| H  | 0.762502  | -2.860620 | -2.294320 |
| H  | 2.953890  | -3.617544 | -2.930491 |
| C  | -3.923397 | -4.338982 | -3.435584 |
| H  | -4.519128 | -5.004618 | -4.070471 |
| H  | -3.822766 | -3.365591 | -3.941328 |
| H  | -2.920725 | -4.772365 | -3.305294 |
| C  | -5.253253 | -1.066538 | -1.850439 |
| H  | -5.092773 | -0.154755 | -2.436539 |
| H  | -6.017575 | -1.676513 | -2.357222 |
| H  | -5.629595 | -0.789792 | -0.854710 |
| C  | -0.268513 | 2.320462  | -1.950937 |
| C  | 0.742490  | 3.296116  | -2.150442 |
| C  | -1.043722 | 1.892752  | -3.056998 |
| C  | 0.926082  | 3.857861  | -3.422250 |
| C  | -0.821912 | 2.454956  | -4.321693 |
| C  | 0.150729  | 3.440296  | -4.508512 |
| H  | -3.417285 | 1.128040  | -0.031474 |
| H  | -5.682900 | 1.810338  | -0.709781 |
| C  | -3.621286 | 2.175260  | -0.206331 |
| C  | -4.909025 | 2.557126  | -0.592836 |
| C  | -2.608492 | 3.140203  | -0.046461 |
| C  | -5.200174 | 3.902209  | -0.827583 |
| H  | -6.197661 | 4.195596  | -1.128104 |

|   |           |           |           |
|---|-----------|-----------|-----------|
| C | -2.915617 | 4.492556  | -0.284260 |
| C | -4.204434 | 4.868870  | -0.673429 |
| H | -2.157811 | 5.258205  | -0.174111 |
| H | -4.430986 | 5.911344  | -0.856079 |
| C | 2.645051  | -0.466114 | -2.076790 |
| H | 2.867843  | -1.498844 | -2.376589 |
| C | 2.368210  | 0.395721  | -3.289959 |
| H | 2.459739  | 1.466244  | -3.064502 |
| H | 3.096839  | 0.209392  | -4.099809 |
| H | 1.376700  | 0.237340  | -3.748426 |
| B | 3.728984  | 0.015666  | -1.110557 |
| O | 4.349401  | 1.252499  | -1.182474 |
| O | 4.247687  | -0.743640 | -0.066347 |
| C | 5.475068  | -0.113774 | 0.353708  |
| C | 5.239940  | 1.380233  | -0.053843 |
| C | 5.673336  | -0.338489 | 1.837228  |
| H | 4.820122  | 0.018440  | 2.427955  |
| H | 5.803145  | -1.410558 | 2.042067  |
| H | 6.574787  | 0.179539  | 2.195684  |
| C | 6.600827  | -0.768822 | -0.433170 |
| H | 6.476670  | -0.614800 | -1.514660 |
| H | 7.588363  | -0.384977 | -0.141622 |
| H | 6.588420  | -1.851570 | -0.247582 |
| C | 6.486105  | 2.118841  | -0.493024 |
| H | 7.230218  | 2.150315  | 0.315986  |
| H | 6.950999  | 1.653435  | -1.370573 |
| H | 6.238424  | 3.155941  | -0.757532 |
| C | 4.509590  | 2.169128  | 1.019511  |
| H | 4.197092  | 3.141788  | 0.617928  |
| H | 3.610090  | 1.636122  | 1.354864  |
| H | 5.142419  | 2.354116  | 1.898268  |
| C | 1.681329  | 3.725030  | -1.055182 |
| H | 1.629830  | 3.059771  | -0.173784 |
| H | 2.728027  | 3.688635  | -1.424365 |
| H | 1.445427  | 4.764494  | -0.745844 |
| C | -2.124515 | 0.855849  | -2.935311 |
| H | -3.102776 | 1.307251  | -3.202934 |
| H | -1.913751 | 0.014173  | -3.628166 |
| H | -2.200901 | 0.442734  | -1.914716 |
| C | 0.359873  | 4.027992  | -5.873196 |
| H | 0.643069  | 3.224593  | -6.585471 |
| H | -0.579774 | 4.506602  | -6.220938 |
| H | 1.164076  | 4.794254  | -5.870110 |
| H | 1.694959  | 4.607751  | -3.568763 |
| H | -1.418117 | 2.128726  | -5.166582 |

123

Figure\_S9\_imid-2\_modeD\_ts(AS)\_04 / electronic energy: -4442.807721719831 a.u. / lowest freq: -259.92 cm-1

|    |           |           |           |
|----|-----------|-----------|-----------|
| C  | -1.152471 | 1.887257  | 1.637361  |
| H  | -2.126977 | 1.498982  | 1.959382  |
| C  | -1.212445 | 2.744354  | 0.354929  |
| H  | -0.616632 | 3.665196  | 0.460677  |
| C  | -0.016381 | 0.759864  | -0.121923 |
| C  | 0.180339  | -0.288888 | 2.044311  |
| C  | 1.550500  | -0.571391 | 1.934627  |
| C  | -0.595070 | -1.044380 | 2.945901  |
| C  | 2.150895  | -1.570931 | 2.688579  |
| H  | 2.153414  | 0.014236  | 1.236770  |
| C  | 0.027117  | -2.032387 | 3.716793  |
| C  | 1.387342  | -2.299441 | 3.597763  |
| H  | 3.213828  | -1.776967 | 2.549553  |
| H  | -0.593560 | -2.611078 | 4.402150  |
| H  | 1.843720  | -3.083331 | 4.205985  |
| S  | -2.374746 | -0.862172 | 3.164232  |
| O  | -2.814468 | -2.117704 | 3.841149  |
| O  | -2.952566 | -0.790497 | 1.785691  |
| O  | -2.571927 | 0.352485  | 3.972413  |
| Cu | 0.996210  | -0.809035 | -0.919458 |
| C  | -0.527053 | 2.635103  | 2.790758  |
| C  | -1.345513 | 3.197897  | 3.785873  |
| C  | 0.864075  | 2.834306  | 2.862320  |
| C  | -0.781142 | 3.912679  | 4.846719  |
| H  | -2.421919 | 3.090839  | 3.737298  |
| C  | 1.424964  | 3.548354  | 3.924264  |
| H  | 1.514914  | 2.434872  | 2.100601  |
| C  | 0.603262  | 4.084488  | 4.918070  |
| H  | -1.418322 | 4.338044  | 5.611222  |
| H  | 2.497111  | 3.688517  | 3.974257  |
| H  | 1.038436  | 4.638881  | 5.739435  |
| N  | -0.325004 | 0.730501  | 1.194494  |
| N  | -0.568997 | 1.863722  | -0.643261 |
| C  | 1.011261  | -2.872743 | -1.226528 |
| C  | 2.249414  | -3.571258 | -0.888618 |
| C  | 3.185803  | -3.864571 | -1.899040 |
| C  | 2.565038  | -3.950298 | 0.428852  |
| C  | 4.407509  | -4.458121 | -1.596855 |
| C  | 3.786335  | -4.540275 | 0.731733  |
| C  | 4.721176  | -4.785513 | -0.276919 |
| H  | 5.121070  | -4.666899 | -2.397601 |

|    |           |           |           |
|----|-----------|-----------|-----------|
| H  | 4.010161  | -4.816192 | 1.765835  |
| H  | 5.682856  | -5.245656 | -0.037592 |
| C  | -0.024671 | -2.565454 | -0.314151 |
| C  | -1.266573 | -2.046050 | -0.730817 |
| H  | -1.874589 | -1.489703 | -0.014602 |
| H  | -1.378526 | -1.767026 | -1.779973 |
| H  | 1.843563  | -3.779476 | 1.229369  |
| H  | 0.113071  | -2.766883 | 0.753256  |
| P  | -3.987573 | -3.204929 | -1.056896 |
| O  | -4.582154 | -4.204478 | -2.196360 |
| O  | -4.927856 | -3.271578 | 0.111345  |
| O  | -4.005488 | -1.736520 | -1.771480 |
| O  | -2.488228 | -3.512469 | -0.879990 |
| Na | -4.352282 | -2.807310 | 2.203165  |
| H  | 0.754716  | -2.857446 | -2.294388 |
| H  | 2.944218  | -3.617706 | -2.936554 |
| C  | -3.885749 | -4.334799 | -3.423222 |
| H  | -4.461567 | -5.015146 | -4.060927 |
| H  | -3.790122 | -3.365249 | -3.937480 |
| H  | -2.879394 | -4.752734 | -3.272281 |
| C  | -5.251342 | -1.090959 | -1.958492 |
| H  | -5.064436 | -0.154861 | -2.496245 |
| H  | -5.940646 | -1.706411 | -2.557925 |
| H  | -5.733897 | -0.860512 | -0.997370 |
| C  | -0.252942 | 2.328724  | -1.946598 |
| C  | 0.757580  | 3.307138  | -2.134812 |
| C  | -1.018444 | 1.903336  | -3.060380 |
| C  | 0.949569  | 3.874315  | -3.402939 |
| C  | -0.788489 | 2.471285  | -4.321078 |
| C  | 0.183186  | 3.459632  | -4.496596 |
| H  | -3.402601 | 1.106974  | -0.051504 |
| H  | -5.671204 | 1.768219  | -0.739175 |
| C  | -3.616435 | 2.152650  | -0.223386 |
| C  | -4.905871 | 2.522745  | -0.615281 |
| C  | -2.614216 | 3.127030  | -0.054752 |
| C  | -5.209404 | 3.865749  | -0.846393 |
| H  | -6.208226 | 4.150195  | -1.151038 |
| C  | -2.933681 | 4.477141  | -0.288828 |
| C  | -4.224286 | 4.841880  | -0.683240 |
| H  | -2.184206 | 5.249903  | -0.171613 |
| H  | -4.460476 | 5.882720  | -0.862975 |
| C  | 2.650028  | -0.465146 | -2.072876 |
| H  | 2.871389  | -1.497609 | -2.374745 |
| C  | 2.379275  | 0.400976  | -3.284274 |
| H  | 2.466887  | 1.470834  | -3.054013 |
| H  | 3.113743  | 0.219680  | -4.090015 |
| H  | 1.391231  | 0.242110  | -3.749884 |
| B  | 3.732084  | 0.011708  | -1.102162 |
| O  | 4.353378  | 1.248470  | -1.167626 |
| O  | 4.248019  | -0.752312 | -0.060133 |
| C  | 5.475075  | -0.125205 | 0.364874  |
| C  | 5.242166  | 1.370735  | -0.036987 |
| C  | 5.670249  | -0.356073 | 1.847834  |
| H  | 4.816044  | -0.001015 | 2.438256  |
| H  | 5.798977  | -1.429026 | 2.048649  |
| H  | 6.571284  | 0.160015  | 2.210095  |
| C  | 6.601688  | -0.778198 | -0.422504 |
| H  | 6.479813  | -0.619686 | -1.503607 |
| H  | 7.589078  | -0.396666 | -0.127444 |
| H  | 6.587634  | -1.861694 | -0.241435 |
| C  | 6.489811  | 2.109773  | -0.471221 |
| H  | 7.232299  | 2.138203  | 0.339398  |
| H  | 6.956133  | 1.646749  | -1.349262 |
| H  | 6.243404  | 3.147871  | -0.732973 |
| C  | 4.510885  | 2.156262  | 1.038261  |
| H  | 4.200770  | 3.131117  | 0.640206  |
| H  | 3.609814  | 1.623468  | 1.369690  |
| H  | 5.142210  | 2.336680  | 1.919047  |
| C  | 1.687447  | 3.733626  | -1.031087 |
| H  | 1.627547  | 3.067849  | -0.150698 |
| H  | 2.737055  | 3.696009  | -1.391743 |
| H  | 1.450326  | 4.773092  | -0.722675 |
| C  | -2.096654 | 0.862409  | -2.951655 |
| H  | -3.074346 | 1.311968  | -3.224360 |
| H  | -1.878050 | 0.024522  | -3.646701 |
| H  | -2.178870 | 0.444312  | -1.933776 |
| C  | 0.401133  | 4.053484  | -5.857232 |
| H  | 0.691462  | 3.253716  | -6.570715 |
| H  | -0.536990 | 4.531438  | -6.209955 |
| H  | 1.203529  | 4.821551  | -5.844964 |
| H  | 1.717969  | 4.626365  | -3.540663 |
| H  | -1.377401 | 2.146985  | -5.171805 |

123

Figure\_S9\_imid-2\_modeD\_ts(AS)\_05 / electronic energy: -4442.807644380910 a.u. / lowest freq: -260.13 cm-1

|   |           |          |          |
|---|-----------|----------|----------|
| C | -0.331492 | 2.365787 | 1.502201 |
| H | -1.413485 | 2.520163 | 1.594568 |
| C | 0.318919  | 3.182676 | 0.367192 |
| H | 1.253222  | 3.660428 | 0.702365 |

|    |           |           |           |
|----|-----------|-----------|-----------|
| C  | 0.442136  | 0.886295  | -0.191963 |
| C  | -0.379324 | -0.202183 | 1.802470  |
| C  | 0.654944  | -1.145919 | 1.898440  |
| C  | -1.608707 | -0.482861 | 2.430865  |
| C  | 0.494300  | -2.333991 | 2.600058  |
| H  | 1.608133  | -0.937660 | 1.406201  |
| C  | -1.751238 | -1.674826 | 3.149135  |
| C  | -0.713620 | -2.597284 | 3.242011  |
| H  | 1.319838  | -3.047993 | 2.632301  |
| H  | -2.715976 | -1.874177 | 3.618898  |
| H  | -0.855354 | -3.522497 | 3.804955  |
| S  | -3.056847 | 0.582847  | 2.346773  |
| O  | -4.212589 | -0.276402 | 2.730923  |
| O  | -3.163146 | 0.996313  | 0.911720  |
| O  | -2.808728 | 1.693664  | 3.281409  |
| Cu | 0.685328  | -0.939531 | -1.038074 |
| C  | 0.315291  | 2.638542  | 2.839217  |
| C  | -0.322406 | 3.476256  | 3.771164  |
| C  | 1.582390  | 2.114616  | 3.152506  |
| C  | 0.277959  | 3.750548  | 5.003793  |
| H  | -1.280358 | 3.925302  | 3.541279  |
| C  | 2.179566  | 2.389580  | 4.385305  |
| H  | 2.105727  | 1.492887  | 2.444077  |
| C  | 1.525899  | 3.203991  | 5.312581  |
| H  | -0.222483 | 4.391793  | 5.717773  |
| H  | 3.151122  | 1.973802  | 4.619509  |
| H  | 1.989633  | 3.417997  | 6.266793  |
| N  | -0.108540 | 0.965170  | 1.040401  |
| N  | 0.636446  | 2.138284  | -0.629057 |
| C  | -0.181719 | -2.715610 | -1.636725 |
| C  | 0.449980  | -3.950695 | -1.177300 |
| C  | 1.323887  | -4.644835 | -2.036835 |
| C  | 0.229705  | -4.485506 | 0.105484  |
| C  | 1.994608  | -5.787172 | -1.612530 |
| C  | 0.901918  | -5.626108 | 0.530680  |
| C  | 1.799441  | -6.275371 | -0.319588 |
| H  | 2.673643  | -6.302108 | -2.296309 |
| H  | 0.719535  | -6.016084 | 1.535767  |
| H  | 2.330185  | -7.168878 | 0.017399  |
| C  | -1.154228 | -1.974371 | -0.916597 |
| C  | -1.962363 | -1.007187 | -1.542409 |
| H  | -2.506075 | -0.293677 | -0.916273 |
| H  | -1.672791 | -0.653663 | -2.532425 |
| H  | -0.479404 | -4.003291 | 0.780691  |
| H  | -1.377206 | -2.231501 | 0.124774  |
| P  | -4.807786 | -1.684521 | -1.598971 |
| O  | -4.630292 | -2.091803 | -0.012687 |
| O  | -5.472511 | -0.340369 | -1.531217 |
| O  | -5.745880 | -2.853169 | -2.221436 |
| O  | -3.470280 | -1.905200 | -2.322666 |
| Na | -5.437697 | 0.175190  | 0.710957  |
| H  | -0.159539 | -2.560684 | -2.723861 |
| H  | 1.472583  | -4.275197 | -3.055106 |
| C  | -4.095773 | -3.352948 | 0.352895  |
| H  | -3.612996 | -3.244631 | 1.333223  |
| H  | -4.890847 | -4.110259 | 0.426928  |
| H  | -3.347562 | -3.697315 | -0.377608 |
| C  | -7.132466 | -2.845999 | -1.920365 |
| H  | -7.588329 | -3.689014 | -2.451011 |
| H  | -7.312070 | -2.972668 | -0.840795 |
| H  | -7.610911 | -1.913135 | -2.251182 |
| C  | 1.384939  | 2.432000  | -1.798420 |
| C  | 2.750433  | 2.805724  | -1.701253 |
| C  | 0.745796  | 2.470884  | -3.062391 |
| C  | 3.430379  | 3.259759  | -2.840447 |
| C  | 1.456843  | 2.909530  | -4.188096 |
| C  | 2.790419  | 3.312981  | -4.082672 |
| H  | -2.228614 | 2.917255  | -0.662881 |
| H  | -3.657481 | 4.672330  | -1.627403 |
| C  | -1.861066 | 3.932708  | -0.700257 |
| C  | -2.675936 | 4.926575  | -1.248872 |
| C  | -0.581634 | 4.249590  | -0.207021 |
| C  | -2.224943 | 6.246651  | -1.310647 |
| H  | -2.856946 | 7.015227  | -1.736356 |
| C  | -0.139021 | 5.583556  | -0.274306 |
| C  | -0.957990 | 6.574774  | -0.823224 |
| H  | 0.842058  | 5.858635  | 0.092418  |
| H  | -0.608806 | 7.598052  | -0.872471 |
| C  | 2.505544  | -1.421330 | -1.843000 |
| H  | 2.282949  | -2.421508 | -2.236156 |
| C  | 2.925315  | -0.488254 | -2.956469 |
| H  | 3.458750  | 0.392935  | -2.577488 |
| H  | 3.632408  | -0.977271 | -3.650743 |
| H  | 2.096690  | -0.130677 | -3.591464 |
| B  | 3.441318  | -1.553397 | -0.639651 |
| O  | 4.549480  | -0.752463 | -0.418824 |
| O  | 3.317544  | -2.521892 | 0.349861  |
| C  | 4.584453  | -2.587912 | 1.037692  |

|   |           |           |           |
|---|-----------|-----------|-----------|
| C | 5.148108  | -1.140339 | 0.836994  |
| C | 4.346940  | -2.985392 | 2.478625  |
| H | 3.650019  | -2.306448 | 2.986127  |
| H | 3.921819  | -3.998252 | 2.523195  |
| H | 5.288421  | -2.993708 | 3.046824  |
| C | 5.420677  | -3.643908 | 0.328943  |
| H | 5.606413  | -3.370439 | -0.719704 |
| H | 6.391217  | -3.801307 | 0.819834  |
| H | 4.878621  | -4.599282 | 0.332113  |
| C | 6.653849  | -1.060983 | 0.705361  |
| H | 7.148915  | -1.440485 | 1.611030  |
| H | 7.019825  | -1.635823 | -0.153945 |
| H | 6.966630  | -0.016878 | 0.567450  |
| C | 4.658879  | -0.174745 | 1.901595  |
| H | 4.902700  | 0.855595  | 1.612429  |
| H | 3.570732  | -0.247285 | 2.025535  |
| H | 5.123724  | -0.369158 | 2.877856  |
| C | 3.534229  | 2.679641  | -0.422674 |
| H | 2.999784  | 2.081062  | 0.338341  |
| H | 4.496065  | 2.161586  | -0.621925 |
| H | 3.748523  | 3.688995  | -0.013902 |
| C | -0.689103 | 2.066507  | -3.257818 |
| H | -1.278037 | 2.941153  | -3.605498 |
| H | -0.747174 | 1.265216  | -4.024263 |
| H | -1.151808 | 1.680663  | -2.332216 |
| C | 3.522911  | 3.783568  | -5.304766 |
| H | 3.540508  | 2.973320  | -6.063807 |
| H | 3.006249  | 4.669139  | -5.731063 |
| H | 4.570794  | 4.067728  | -5.069924 |
| H | 4.471402  | 3.550984  | -2.760189 |
| H | 0.965469  | 2.943566  | -5.154046 |

123

Figure\_S9\_imid-2\_modeD\_ts(AS)\_06 / electronic energy: -4442.807603325020 a.u. / lowest freq: -264.33 cm-1

|    |           |           |           |
|----|-----------|-----------|-----------|
| C  | -0.292954 | 2.382648  | 1.496744  |
| H  | -1.371892 | 2.552912  | 1.596308  |
| C  | 0.361119  | 3.185071  | 0.353710  |
| H  | 1.306221  | 3.647992  | 0.679388  |
| C  | 0.445824  | 0.884936  | -0.196832 |
| C  | -0.378298 | -0.182773 | 1.808353  |
| C  | 0.641378  | -1.142518 | 1.902870  |
| C  | -1.608284 | -0.441120 | 2.445288  |
| C  | 0.465828  | -2.325154 | 2.610176  |
| H  | 1.595319  | -0.951370 | 1.405121  |
| C  | -1.766536 | -1.628689 | 3.167423  |
| C  | -0.743123 | -2.567200 | 3.258499  |
| H  | 1.280630  | -3.051519 | 2.641138  |
| H  | -2.731844 | -1.811455 | 3.642568  |
| H  | -0.896944 | -3.488180 | 3.825219  |
| S  | -3.041108 | 0.645748  | 2.363677  |
| O  | -4.207098 | -0.194277 | 2.760190  |
| O  | -3.150996 | 1.049956  | 0.926589  |
| O  | -2.772676 | 1.758729  | 3.290148  |
| Cu | 0.662389  | -0.948103 | -1.033510 |
| C  | 0.367276  | 2.652126  | 2.827804  |
| C  | -0.251397 | 3.503154  | 3.760459  |
| C  | 1.629430  | 2.112396  | 3.133748  |
| C  | 0.362355  | 3.775060  | 4.987027  |
| H  | -1.204658 | 3.964468  | 3.535638  |
| C  | 2.240088  | 2.384963  | 4.360447  |
| H  | 2.138588  | 1.480760  | 2.423932  |
| C  | 1.605032  | 3.212778  | 5.288785  |
| H  | -0.123490 | 4.426733  | 5.701645  |
| H  | 3.207750  | 1.957101  | 4.588952  |
| H  | 2.079241  | 3.425056  | 6.238223  |
| N  | -0.093251 | 0.977094  | 1.039700  |
| N  | 0.653024  | 2.132347  | -0.641854 |
| C  | -0.224411 | -2.716057 | -1.626036 |
| C  | 0.389621  | -3.957172 | -1.159269 |
| C  | 1.255261  | -4.668320 | -2.013389 |
| C  | 0.160768  | -4.481255 | 0.126357  |
| C  | 1.909704  | -5.817205 | -1.581309 |
| C  | 0.816853  | -5.628217 | 0.559312  |
| C  | 1.706528  | -6.294891 | -0.285742 |
| H  | 2.582406  | -6.345478 | -2.261168 |
| H  | 0.628274  | -6.009241 | 1.566684  |
| H  | 2.224531  | -7.193497 | 0.057459  |
| C  | -1.191051 | -1.958987 | -0.914138 |
| C  | -1.975074 | -0.978850 | -1.550172 |
| H  | -2.512892 | -0.253888 | -0.932534 |
| H  | -1.669016 | -0.633343 | -2.537960 |
| H  | -0.542221 | -3.985328 | 0.797862  |
| H  | -1.428404 | -2.209576 | 0.125854  |
| P  | -4.810726 | -1.653520 | -1.579299 |
| O  | -4.586093 | -2.127440 | -0.018830 |
| O  | -5.471617 | -0.311681 | -1.449931 |
| O  | -5.769066 | -2.796108 | -2.220212 |
| O  | -3.494819 | -1.843953 | -2.350423 |
| Na | -5.435764 | 0.248132  | 0.750774  |

|   |           |           |           |
|---|-----------|-----------|-----------|
| H | -0.195091 | -2.565681 | -2.713580 |
| H | 1.410300  | -4.307070 | -3.033725 |
| C | -4.089280 | -3.426501 | 0.258339  |
| H | -3.623459 | -3.408302 | 1.251880  |
| H | -4.902546 | -4.168148 | 0.259800  |
| H | -3.335490 | -3.733267 | -0.483376 |
| C | -7.148717 | -2.790910 | -1.888356 |
| H | -7.619076 | -3.621854 | -2.425339 |
| H | -7.305621 | -2.937955 | -0.807852 |
| H | -7.631139 | -1.850190 | -2.189739 |
| C | 1.397313  | 2.410157  | -1.817814 |
| C | 2.769851  | 2.760250  | -1.732442 |
| C | 0.748610  | 2.458240  | -3.076593 |
| C | 3.448623  | 3.199055  | -2.878324 |
| C | 1.458275  | 2.881198  | -4.209115 |
| C | 2.799774  | 3.260461  | -4.115556 |
| H | -2.199378 | 2.959682  | -0.653942 |
| H | -3.607620 | 4.736196  | -1.609270 |
| C | -1.815379 | 3.968811  | -0.696727 |
| C | -2.618666 | 4.974944  | -1.240037 |
| C | -0.526521 | 4.265444  | -0.215568 |
| C | -2.146634 | 6.287305  | -1.308389 |
| H | -2.769713 | 7.065393  | -1.729956 |
| C | -0.062808 | 5.591914  | -0.289126 |
| C | -0.870220 | 6.595454  | -0.832764 |
| H | 0.925765  | 5.851569  | 0.068623  |
| H | -0.504791 | 7.612789  | -0.886991 |
| C | 2.474934  | -1.458804 | -1.839014 |
| H | 2.238116  | -2.457604 | -2.227098 |
| C | 2.904357  | -0.536487 | -2.957889 |
| H | 3.458228  | 0.334562  | -2.584896 |
| H | 3.596001  | -1.041238 | -3.656368 |
| H | 2.078329  | -0.163651 | -3.587544 |
| B | 3.411649  | -1.597760 | -0.637349 |
| O | 4.529279  | -0.808618 | -0.422347 |
| O | 3.279893  | -2.561849 | 0.355557  |
| C | 4.548950  | -2.640554 | 1.038318  |
| C | 5.127231  | -1.199466 | 0.832830  |
| C | 4.312936  | -3.033297 | 2.480724  |
| H | 3.625314  | -2.346200 | 2.989987  |
| H | 3.876890  | -4.041356 | 2.528423  |
| H | 5.256548  | -3.051077 | 3.045189  |
| C | 5.371636  | -3.705864 | 0.327655  |
| H | 5.555894  | -3.435445 | -0.722056 |
| H | 6.342555  | -3.872310 | 0.814820  |
| H | 4.820615  | -4.656016 | 0.334105  |
| C | 6.633341  | -1.135049 | 0.697142  |
| H | 7.127149  | -1.518809 | 1.601708  |
| H | 6.991696  | -1.713528 | -0.162940 |
| H | 6.955945  | -0.094102 | 0.557856  |
| C | 4.650456  | -0.226746 | 1.896494  |
| H | 4.900599  | 0.800795  | 1.602691  |
| H | 3.562454  | -0.291052 | 2.025724  |
| H | 5.118296  | -0.421624 | 2.871253  |
| C | 3.561166  | 2.625191  | -0.459356 |
| H | 3.023158  | 2.036817  | 0.307061  |
| H | 4.513517  | 2.091931  | -0.664035 |
| H | 3.793930  | 3.632154  | -0.054804 |
| C | -0.695459 | 2.081549  | -3.259056 |
| H | -1.270661 | 2.967573  | -3.600871 |
| H | -0.776023 | 1.282218  | -4.025496 |
| H | -1.156771 | 1.703893  | -2.329368 |
| C | 3.530629  | 3.714693  | -5.344799 |
| H | 3.527290  | 2.902403  | -6.101857 |
| H | 3.026594  | 4.608426  | -5.769189 |
| H | 4.585375  | 3.980367  | -5.119259 |
| H | 4.495221  | 3.472077  | -2.807164 |
| H | 0.959626  | 2.922216  | -5.171064 |

123

Figure\_S9\_imid-2\_modeD\_prod(AS) / electronic energy: -4442.827233578473 a.u. / lowest freq: 20.31 cm-1

|   |          |           |           |
|---|----------|-----------|-----------|
| C | 3.302350 | -0.047818 | -0.637081 |
| H | 3.659354 | -0.506622 | 0.295743  |
| C | 3.044615 | 1.469759  | -0.520349 |
| H | 3.356133 | 1.999654  | -1.434124 |
| C | 0.977980 | 0.366663  | -0.724953 |
| C | 1.613214 | -1.899579 | -1.248936 |
| C | 0.943582 | -2.082941 | -2.466891 |
| C | 1.902860 | -3.011698 | -0.441114 |
| C | 0.579662 | -3.354063 | -2.897469 |
| H | 0.737579 | -1.203448 | -3.082753 |
| C | 1.536613 | -4.284953 | -0.888541 |
| C | 0.886929 | -4.461630 | -2.107402 |
| H | 0.061906 | -3.476397 | -3.851448 |
| H | 1.753676 | -5.138739 | -0.244054 |
| H | 0.611997 | -5.466602 | -2.434814 |
| S | 2.722977 | -2.914893 | 1.165104  |
| O | 2.227671 | -4.103430 | 1.912462  |
| O | 2.227656 | -1.658325 | 1.806809  |



|    |           |           |           |
|----|-----------|-----------|-----------|
| O  | 4.163387  | -2.912179 | 0.866653  |
| Cu | -0.900834 | -0.284390 | -0.983665 |
| C  | 4.243606  | -0.397917 | -1.762418 |
| C  | 5.503702  | -0.954416 | -1.481539 |
| C  | 3.881972  | -0.170139 | -3.103866 |
| C  | 6.377909  | -1.286364 | -2.520852 |
| H  | 5.814132  | -1.126376 | -0.458924 |
| C  | 4.758804  | -0.504441 | -4.139489 |
| H  | 2.919678  | 0.259515  | -3.348005 |
| C  | 6.005334  | -1.063291 | -3.848521 |
| H  | 7.345880  | -1.715404 | -2.296374 |
| H  | 4.471290  | -0.330339 | -5.168276 |
| H  | 6.683454  | -1.321395 | -4.651592 |
| N  | 1.932750  | -0.562225 | -0.891923 |
| N  | 1.565667  | 1.525479  | -0.420881 |
| C  | -2.618789 | -1.611386 | -0.721247 |
| C  | -3.321592 | -2.353706 | -1.756566 |
| C  | -4.570343 | -1.888079 | -2.215576 |
| C  | -2.809644 | -3.540696 | -2.316836 |
| C  | -5.268688 | -2.572759 | -3.203676 |
| C  | -3.508444 | -4.220972 | -3.306954 |
| C  | -4.739256 | -3.739106 | -3.758722 |
| H  | -6.233035 | -2.191871 | -3.547370 |
| H  | -3.091826 | -5.138798 | -3.728685 |
| H  | -5.285671 | -4.274850 | -4.538135 |
| C  | -1.472173 | -2.071942 | -0.027838 |
| C  | -0.823960 | -1.260425 | 0.891774  |
| H  | 0.151607  | -1.529298 | 1.301769  |
| H  | -1.365271 | -0.449588 | 1.402338  |
| H  | -1.854823 | -3.942509 | -1.972645 |
| H  | -0.969743 | -2.983585 | -0.376487 |
| P  | -1.620413 | -1.063898 | 4.163224  |
| O  | -1.667487 | -2.579654 | 3.440861  |
| O  | -0.154446 | -0.954710 | 4.516580  |
| O  | -2.529077 | -1.317309 | 5.511192  |
| O  | -2.374028 | -0.065747 | 3.336987  |
| Na | 0.990723  | -2.674066 | 3.603048  |
| H  | -3.193812 | -0.807007 | -0.247965 |
| H  | -4.968680 | -0.958389 | -1.804169 |
| C  | -2.894818 | -3.032897 | 2.915880  |
| H  | -2.700750 | -3.901711 | 2.272115  |
| H  | -3.588849 | -3.340973 | 3.715967  |
| H  | -3.388428 | -2.249993 | 2.316464  |
| C  | -2.040785 | -2.191812 | 6.502858  |
| H  | -2.774217 | -2.224100 | 7.318533  |
| H  | -1.910172 | -3.217304 | 6.116658  |
| H  | -1.075849 | -1.852226 | 6.910656  |
| C  | 0.858552  | 2.750485  | -0.311198 |
| C  | 0.834099  | 3.667726  | -1.393748 |
| C  | 0.304300  | 3.134986  | 0.934092  |
| C  | 0.314199  | 4.955449  | -1.201089 |
| C  | -0.186624 | 4.436190  | 1.103332  |
| C  | -0.183395 | 5.348399  | 0.045203  |
| H  | 2.873112  | 0.807249  | 2.157722  |
| H  | 3.966594  | 1.915339  | 4.059563  |
| C  | 3.516380  | 1.653292  | 1.970921  |
| C  | 4.135554  | 2.281118  | 3.055056  |
| C  | 3.724016  | 2.120484  | 0.660190  |
| C  | 4.969738  | 3.380704  | 2.844436  |
| H  | 5.447940  | 3.866387  | 3.685155  |
| C  | 4.567954  | 3.229181  | 0.461322  |
| C  | 5.186147  | 3.853826  | 1.548590  |
| H  | 4.745213  | 3.616402  | -0.534320 |
| H  | 5.831987  | 4.707006  | 1.386057  |
| C  | -1.583799 | 0.813016  | -2.535232 |
| H  | -0.695935 | 1.427551  | -2.728136 |
| C  | -2.015125 | 0.064789  | -3.767494 |
| H  | -2.944748 | -0.501573 | -3.624796 |
| H  | -2.208749 | 0.762329  | -4.601735 |
| H  | -1.257745 | -0.644425 | -4.141667 |
| B  | -2.639225 | 1.550763  | -1.684498 |
| O  | -3.990762 | 1.274255  | -1.723016 |
| O  | -2.341000 | 2.532003  | -0.757094 |
| C  | -3.597782 | 3.152525  | -0.375899 |
| C  | -4.624268 | 2.007122  | -0.644262 |
| C  | -3.557292 | 3.595466  | 1.069492  |
| H  | -3.165987 | 2.815283  | 1.732663  |
| H  | -2.940464 | 4.492715  | 1.191418  |
| H  | -4.569357 | 3.856653  | 1.410045  |
| C  | -3.792300 | 4.345612  | -1.297156 |
| H  | -3.872333 | 4.037593  | -2.349130 |
| H  | -4.693247 | 4.917986  | -1.037081 |
| H  | -2.929687 | 5.018954  | -1.211549 |
| C  | -5.986087 | 2.473430  | -1.109096 |
| H  | -6.454203 | 3.125215  | -0.357519 |
| H  | -5.929224 | 3.023339  | -2.056005 |
| H  | -6.650377 | 1.611544  | -1.260297 |
| C  | -4.762930 | 1.071021  | 0.547173  |

|   |           |          |           |
|---|-----------|----------|-----------|
| H | -5.307272 | 0.162601 | 0.252595  |
| H | -3.789934 | 0.775931 | 0.965458  |
| H | -5.330041 | 1.540887 | 1.361903  |
| C | 1.344864  | 3.319887 | -2.767009 |
| H | 1.566011  | 2.241429 | -2.879185 |
| H | 0.575441  | 3.574321 | -3.526569 |
| H | 2.265760  | 3.902049 | -2.979927 |
| C | 0.225242  | 2.199612 | 2.109485  |
| H | 0.851899  | 2.588949 | 2.938838  |
| H | -0.825732 | 2.133137 | 2.457977  |
| H | 0.557827  | 1.173552 | 1.865412  |
| C | -0.722337 | 6.733115 | 0.255590  |
| H | -1.786460 | 6.678226 | 0.566926  |
| H | -0.138477 | 7.243082 | 1.050435  |
| H | -0.659890 | 7.341526 | -0.671607 |
| H | 0.303931  | 5.656274 | -2.027936 |
| H | -0.583219 | 4.738850 | 2.065974  |

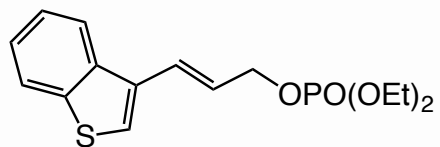

**<sup>1</sup>H NMR of 1-5**

JL-V-33-PD

Sample Name:

JL-V-33-PD

Data Collected on:

nmr13-vnmrs400

Archive directory:

Sample directory:

FidFile: PROTON

Pulse Sequence: PROTON (s2pul)

Solvent: cdcl3

Data collected on: Oct 21 2016

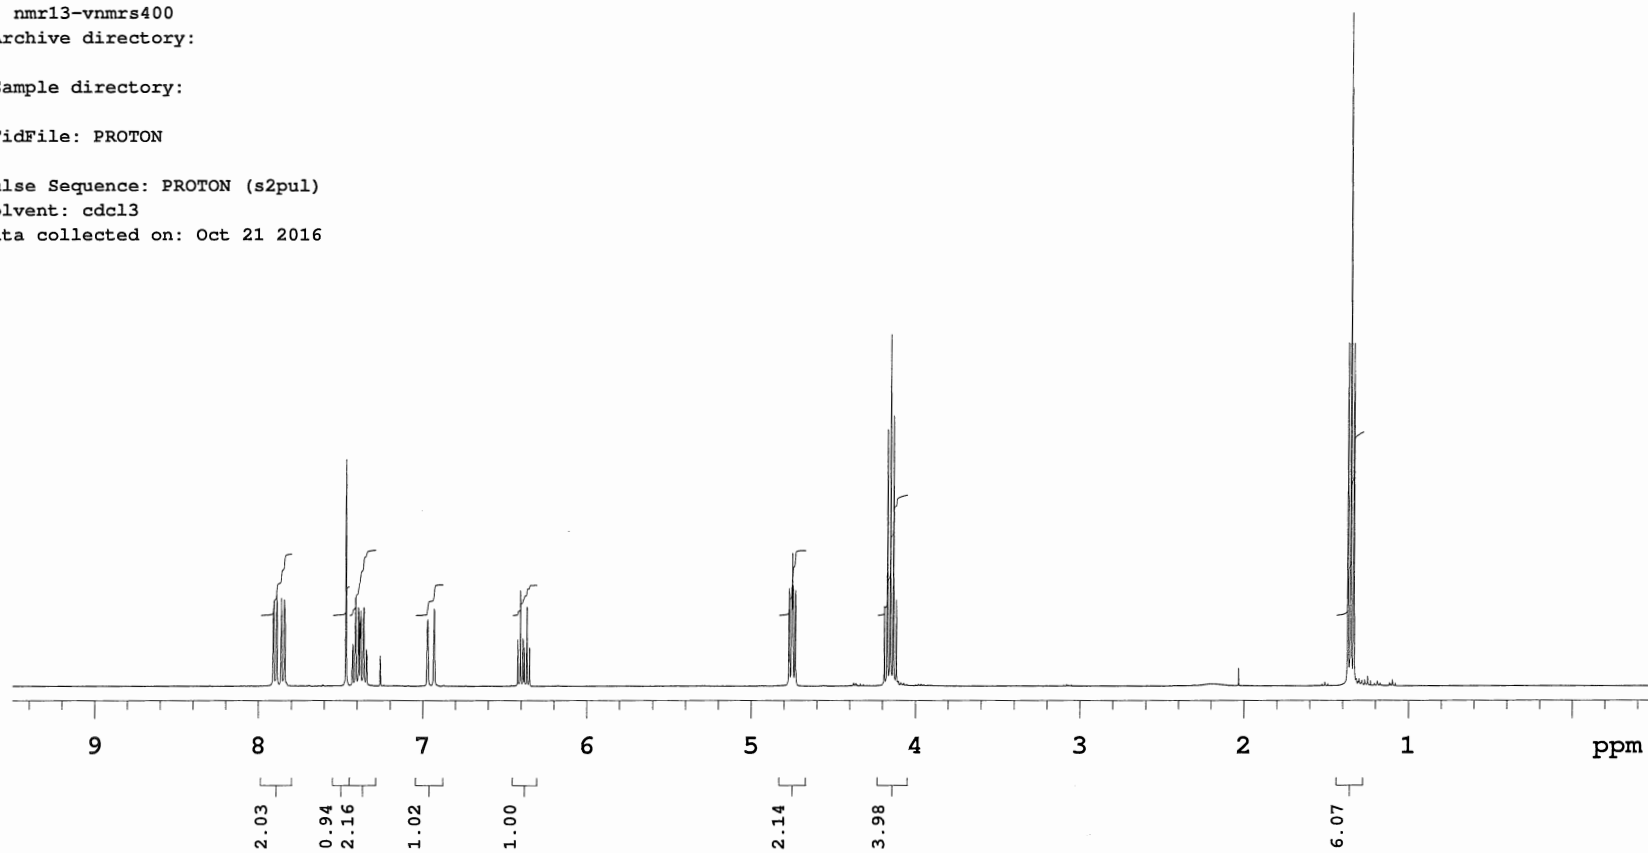

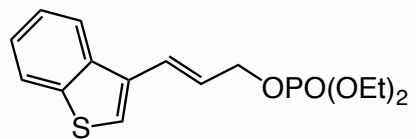

JL-V-33-PD

Sample Name:

JL-V-33-PD

Data Collected on:

nmr13-vnmrs400

Archive directory:

Sample directory:

FidFile: CARBON

Pulse Sequence: CARBON (s2pul)

Solvent: cdcl3

Data collected on: Oct 21 2016

**<sup>13</sup>C NMR of 1-5**

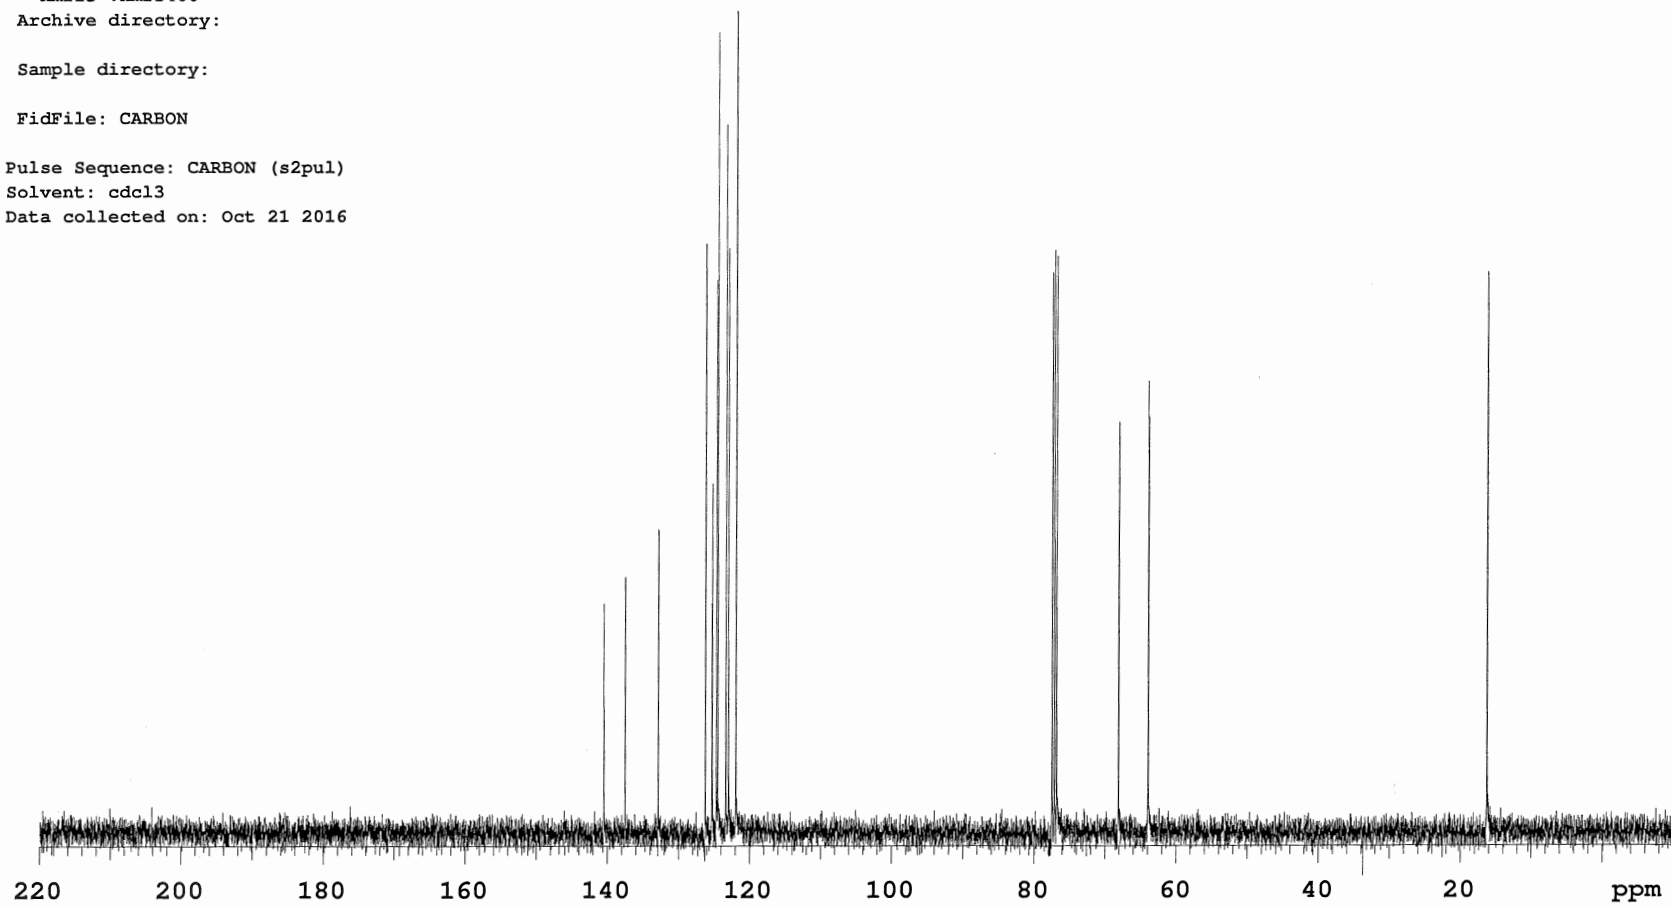

YZ-1-157-PD

Sample Name:  
YZ-1-157-PD

Data Collected on:  
nmr13-vnmrs400

Archive directory:

Sample directory:

FidFile: PROTON

Pulse Sequence: PROTON (s2pul)

Solvent: cdcl3

Data collected on: Oct 21 2016

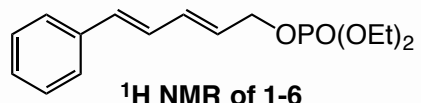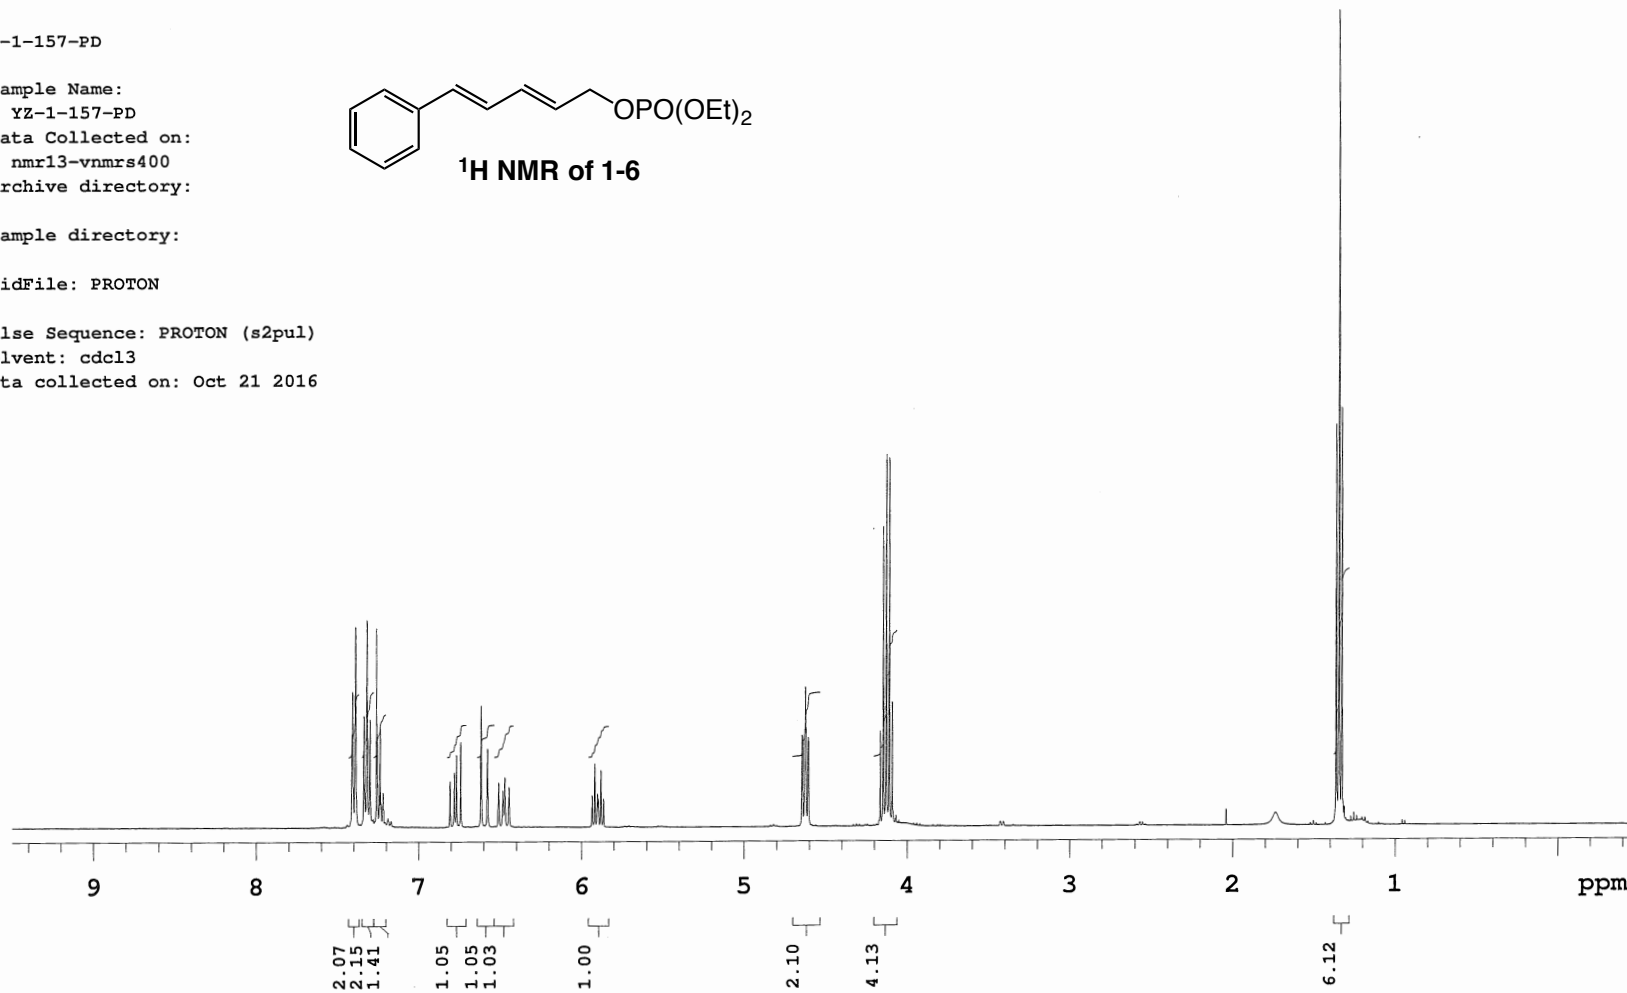

YZ-1-157-PD

Sample Name:

YZ-1-157-PD

Data Collected on:

nmr13-vnmrs400

Archive directory:

Sample directory:

FidFile: CARBON

Pulse Sequence: CARBON (s2pul)

Solvent: cdcl3

Data collected on: Oct 21 2016

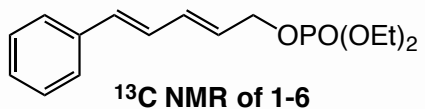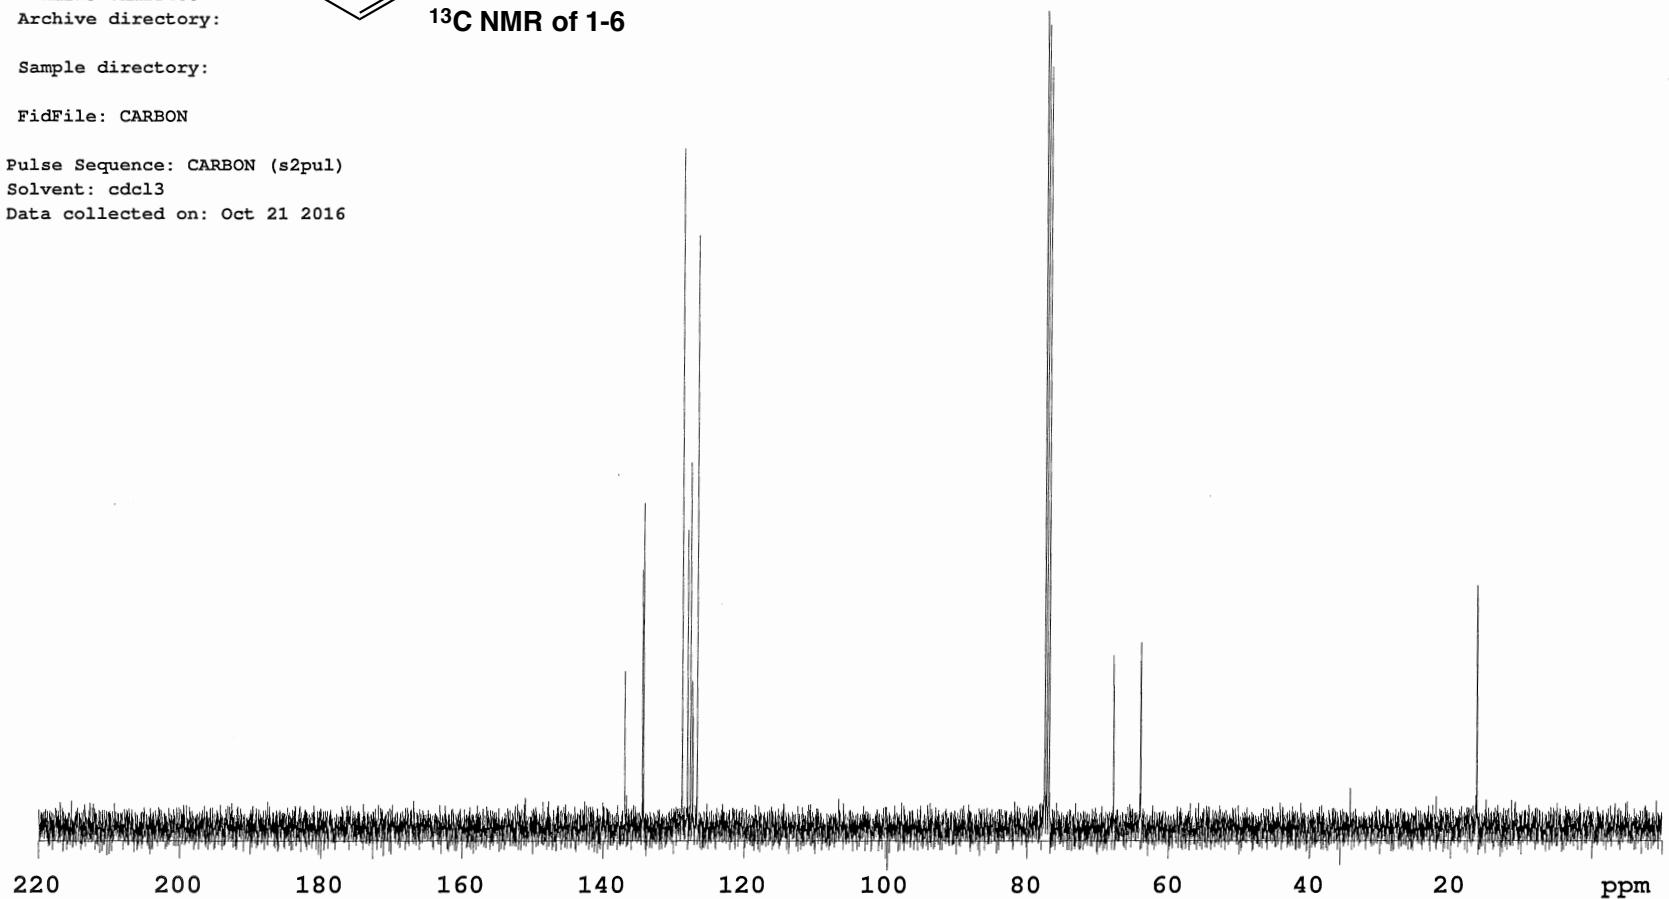

Sample Name:  
SR-IV-166-phos  
Data Collected on:  
vnmr13-vnmrs400  
Archive directory:

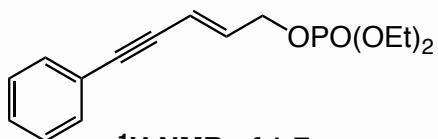

<sup>1</sup>H NMR of 1-7

Sample directory:  
FidFile: SR-IV-166-phos  
Pulse Sequence: PROTON (s2pul)  
Solvent: cdcl3  
Data collected on: Mar 14 2014

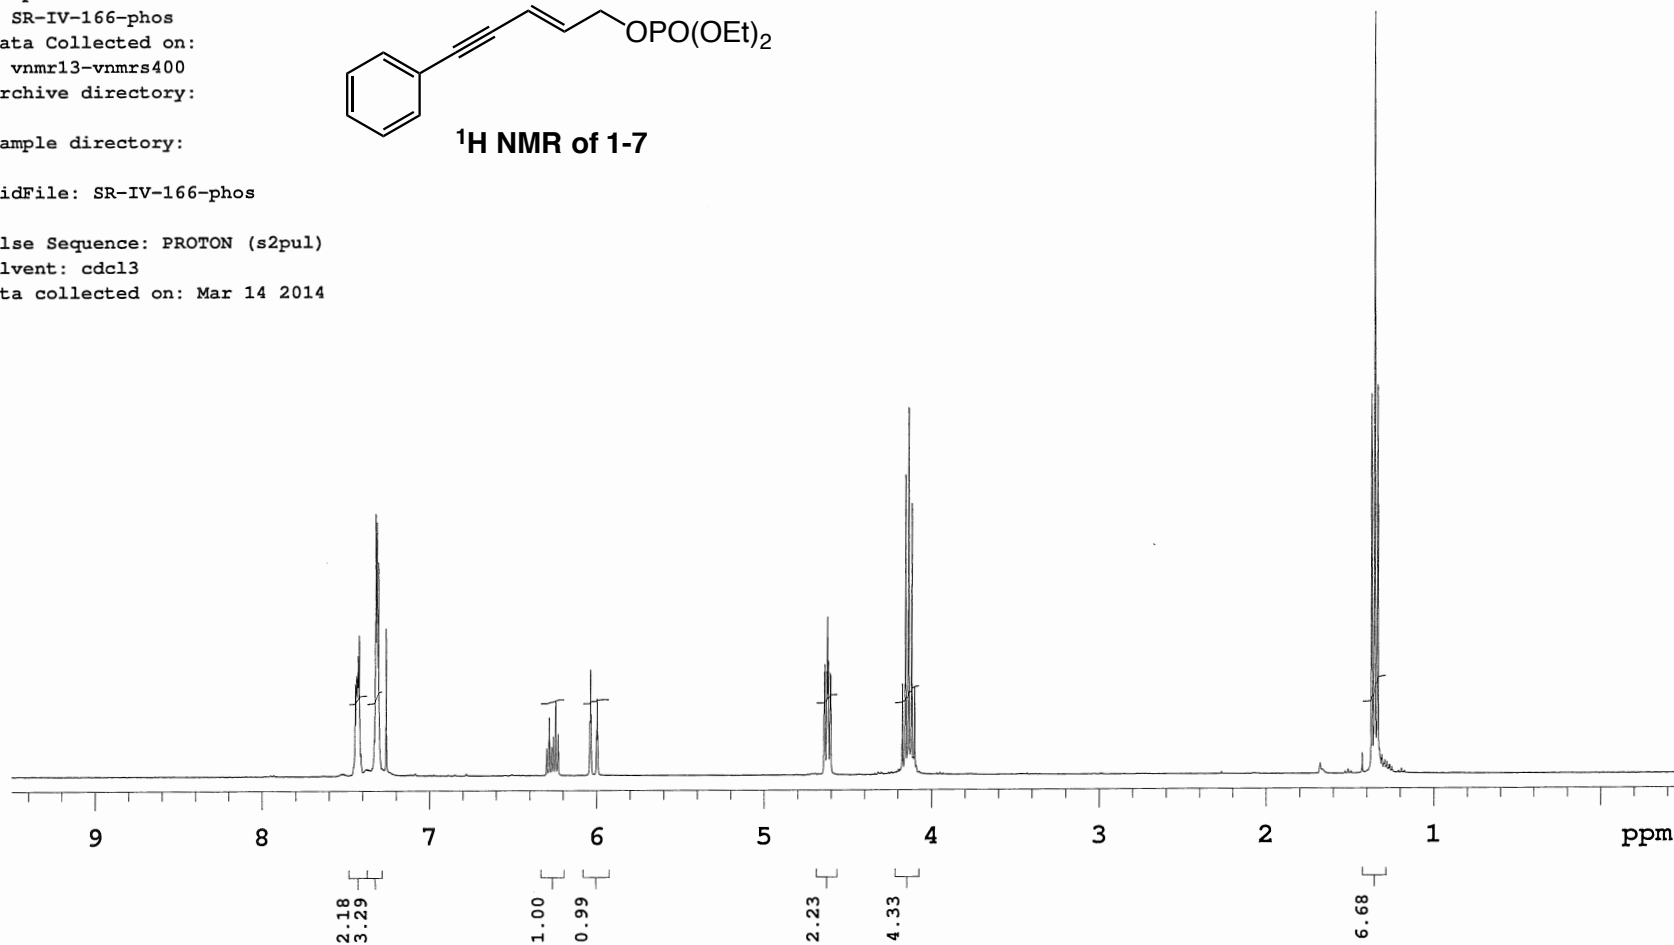

Sample Name:  
SR-IV-166-phos-carbon  
Data Collected on:  
vnmr13-vnmrs400  
Archive directory:

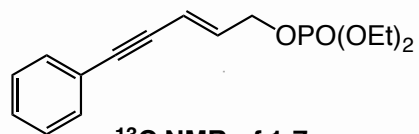

**<sup>13</sup>C NMR of 1-7**

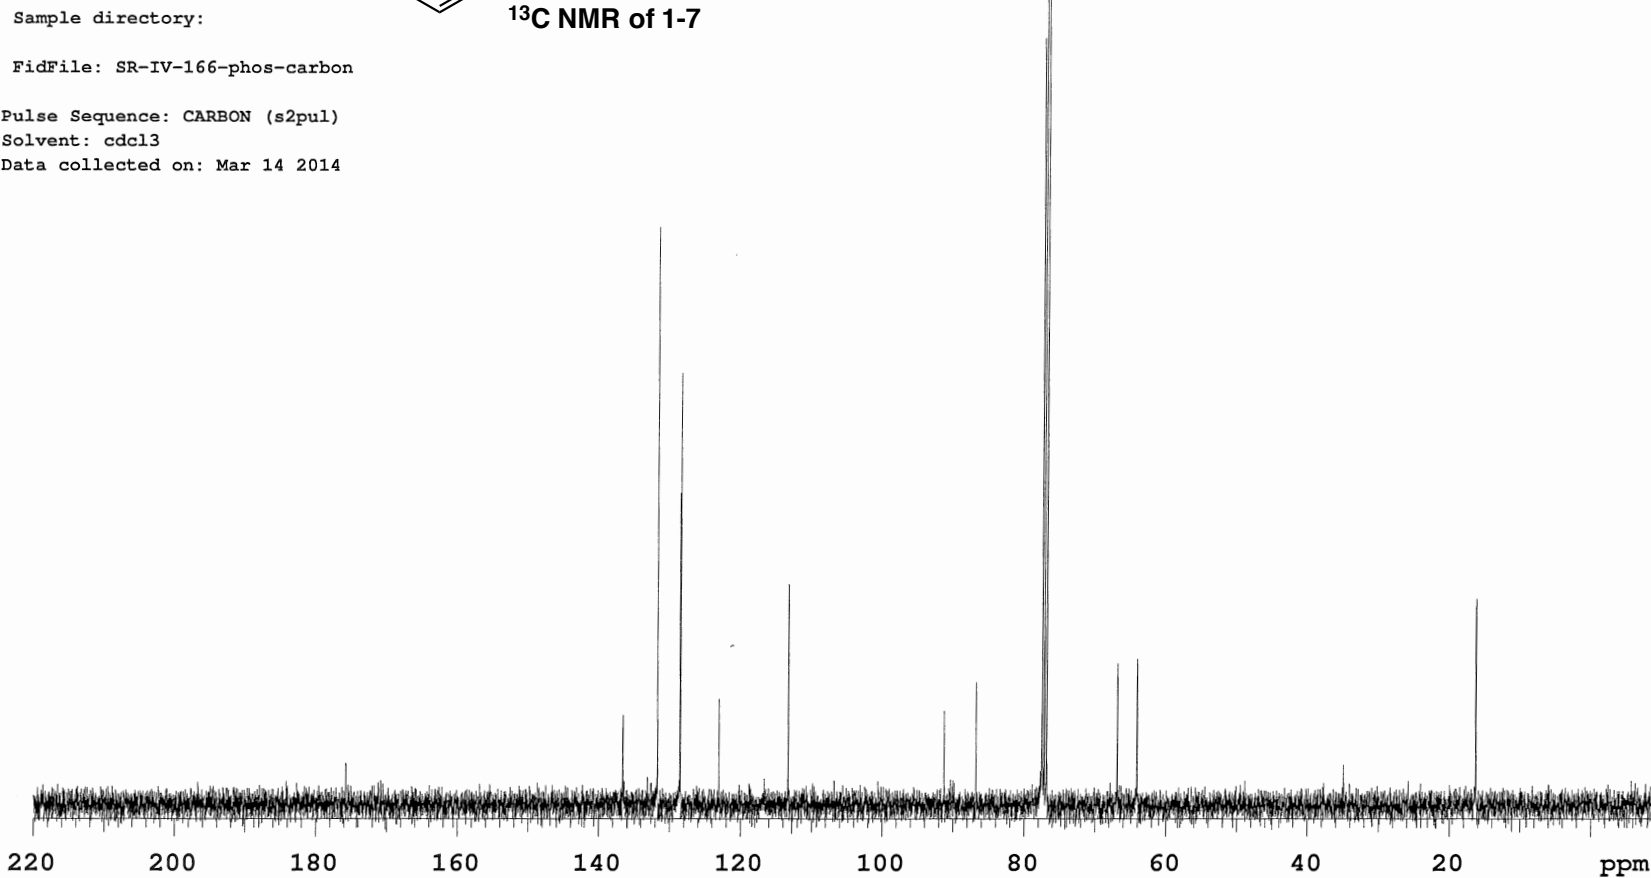

Sample directory:  
FidFile: SR-IV-166-phos-carbon  
Pulse Sequence: CARBON (s2pul)  
Solvent: cdcl3  
Data collected on: Mar 14 2014



JL-IV-199-oxi-PD

Sample Name:

JL-IV-199-oxi-PD

Data Collected on:

nmr13-vnmrs400

Archive directory:

Sample directory:

FidFile: JL-IV-199-oxi-PD

Pulse Sequence: PROTON (s2pul)

Solvent: cdcl3

Data collected on: Mar 1 2016

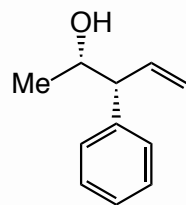

<sup>1</sup>H NMR of 2a

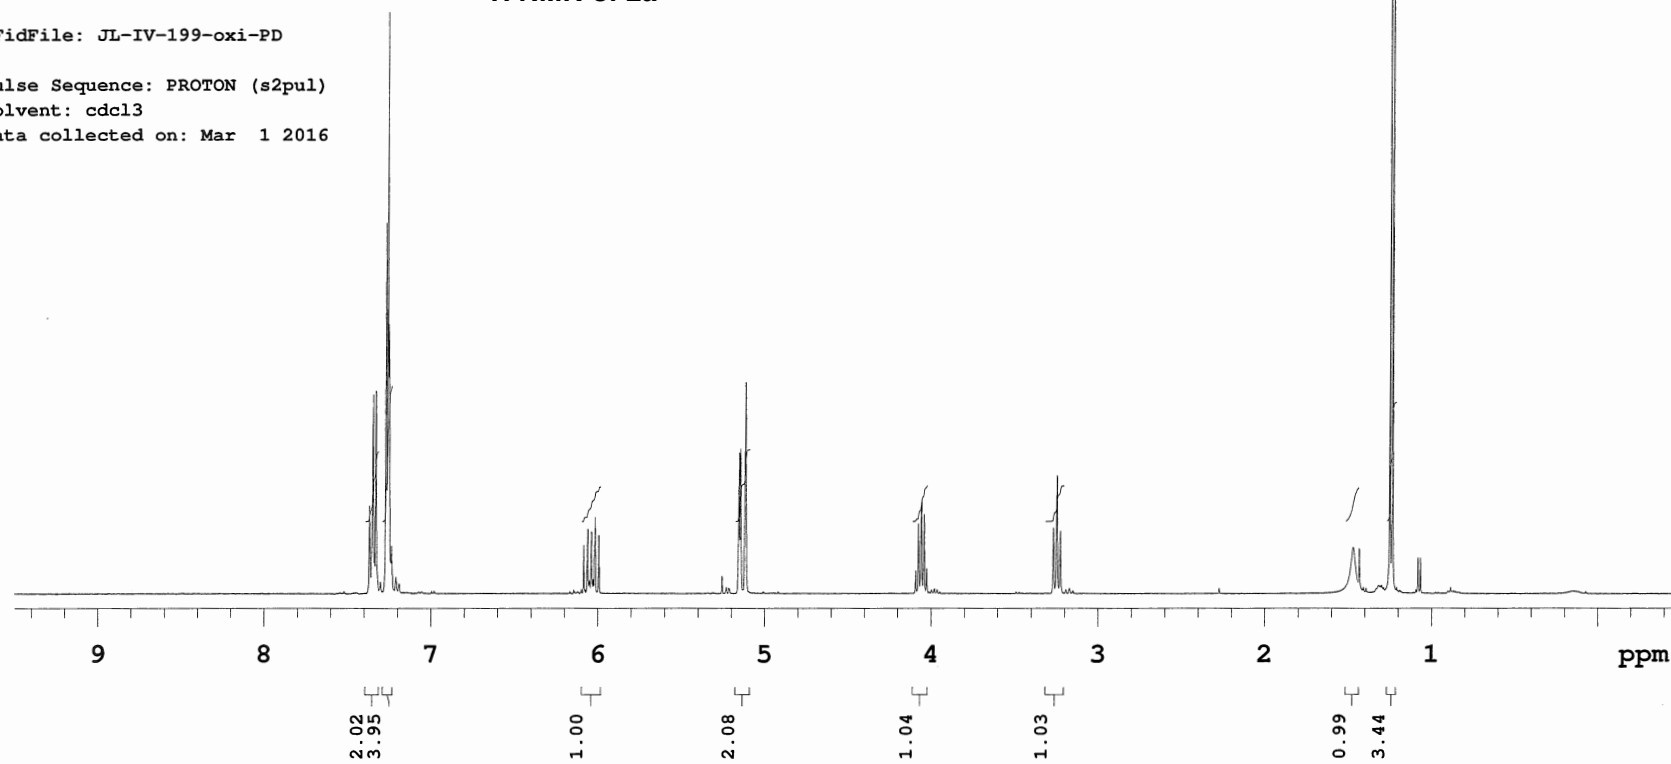

JL-IV-199-PD-C

Sample Name:

JL-IV-199-PD-C

Data Collected on:

nmr13-vnmrs400

Archive directory:

Sample directory:

FidFile: CARBON

Pulse Sequence: CARBON (s2pul)

Solvent: cdcl3

Data collected on: Mar 8 2016

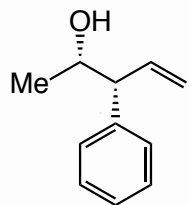

**<sup>13</sup>C NMR of 2a**

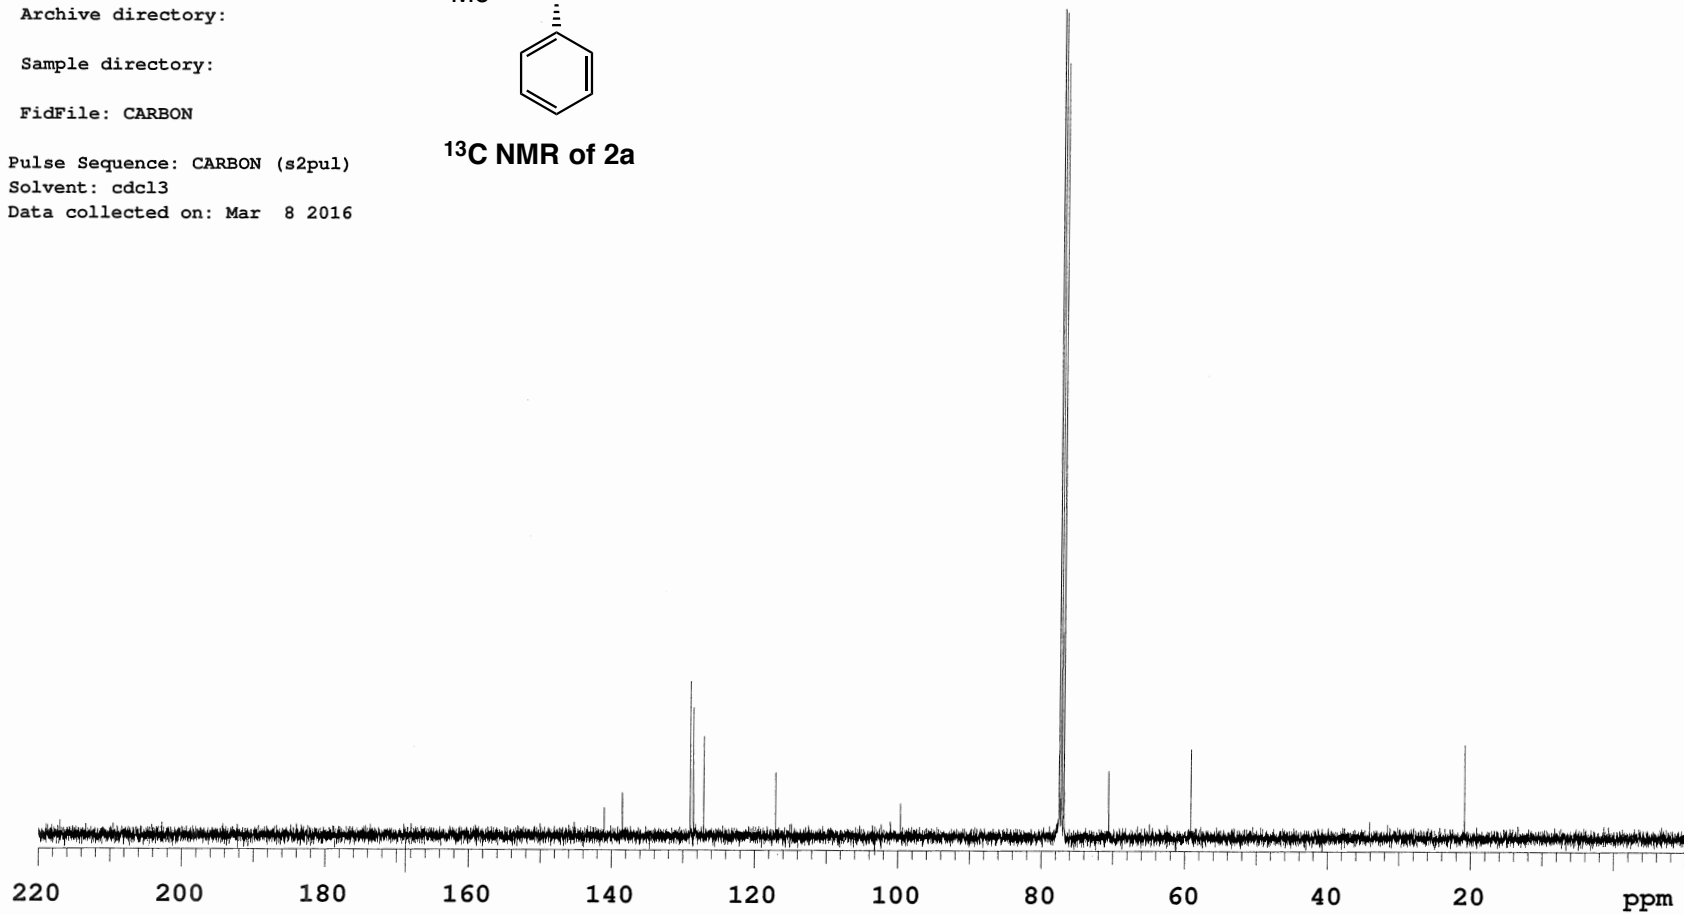

JL-IV-225-2-oxi-PD

Sample Name:

JL-IV-225-2-oxi-PD

Data Collected on:

nmr13-vnmrs400

Archive directory:

Sample directory:

FidFile: PROTON

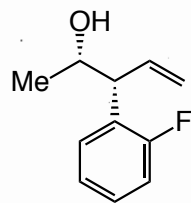

<sup>1</sup>H NMR of 2b

Pulse Sequence: PROTON (s2pul)

Solvent: cdcl3

Data collected on: Mar 26 2016

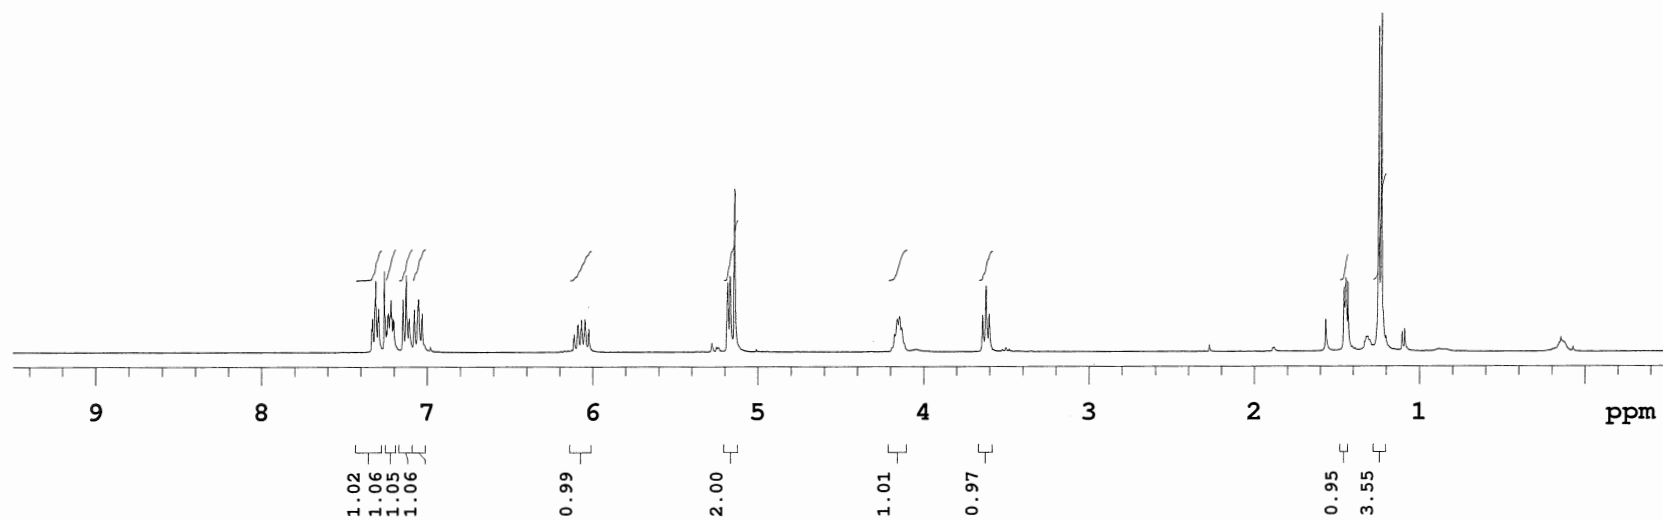

JL-IV-225-2-oxi-PD-C

Sample Name:

JL-IV-225-2-oxi-PD-C

Data Collected on:

nmr13-vnmrs400

Archive directory:

Sample directory:

FidFile: JL-IV-225-2-oxi-PD-C

Pulse Sequence: CARBON (s2pul)

Solvent: cdcl3

Data collected on: Mar 26 2016

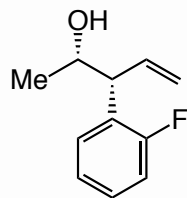

**<sup>13</sup>C NMR of 2b**

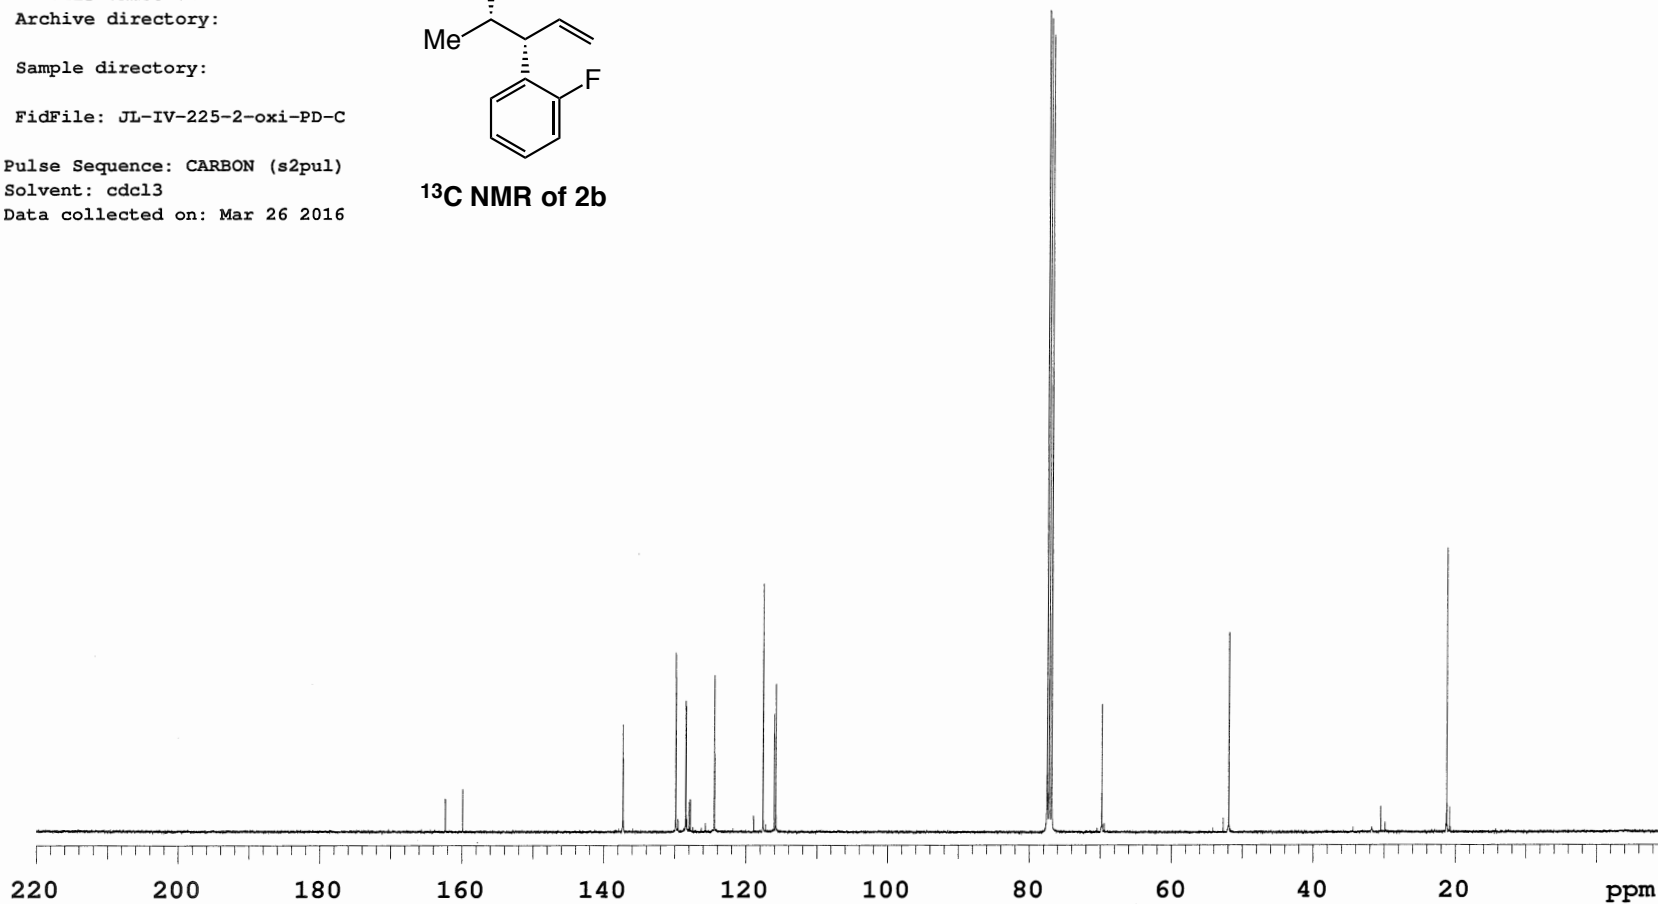

JL-IV-217-2-oxi-PD

Sample Name:

JL-IV-217-2-oxi-PD

Data Collected on:

nmr13-vnmrs400

Archive directory:

Sample directory:

FidFile: PROTON

Pulse Sequence: PROTON (s2pul)

Solvent: cdcl3

Data collected on: Mar 18 2016

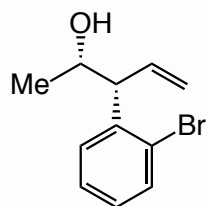**<sup>1</sup>H NMR of 2c**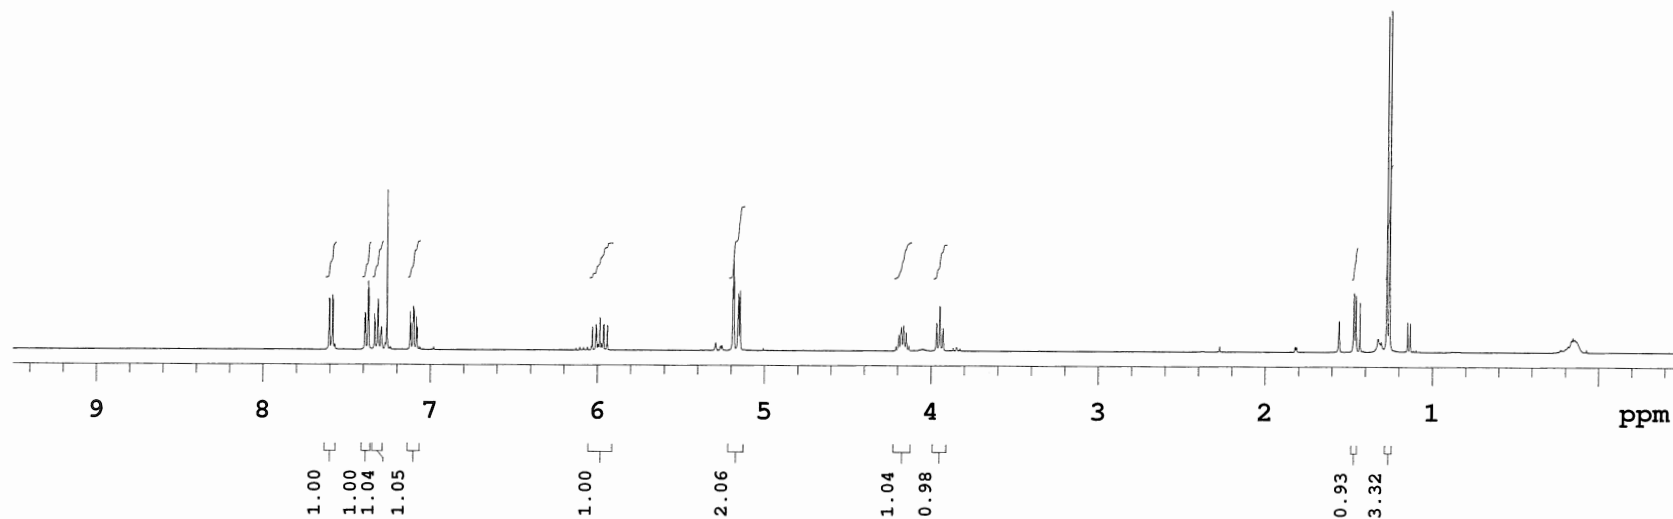

JL-IV-217-2-oxi-PD-C

Sample Name:  
JL-IV-217-2-oxi-PD-C  
Data Collected on:  
nmr13-vnmrs400  
Archive directory:

Sample directory:

FidFile: CARBON

Pulse Sequence: CARBON (s2pul)  
Solvent: cdcl3  
Data collected on: Mar 20 2016

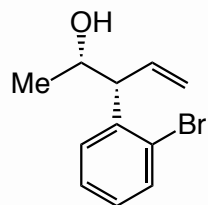

<sup>13</sup>C NMR of 2c

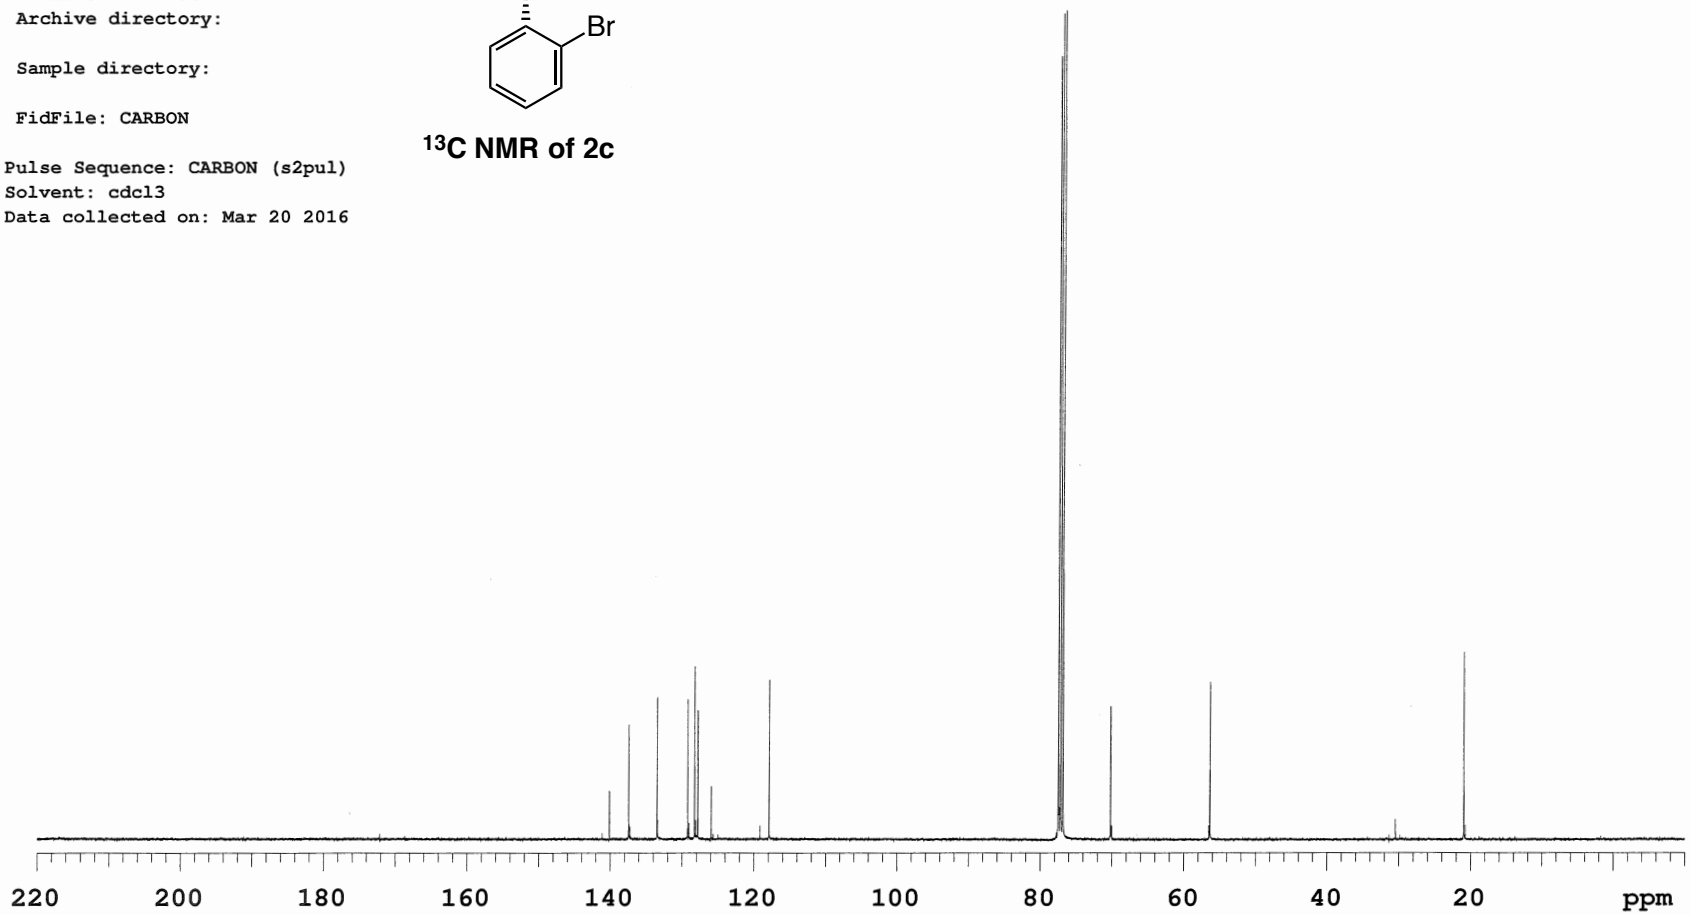

JL-IV-209-1-oxi-PD-prep

Sample Name:

JL-IV-209-1-oxi-PD-prep

Data Collected on:

nmr13-vnmrs400

Archive directory:

Sample directory:

FidFile: JL-IV-209-oxi-PD-prep

Pulse Sequence: PROTON (s2pul)

Solvent: cdcl3

Data collected on: Mar 11 2016

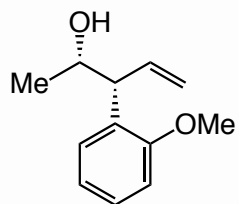**<sup>1</sup>H NMR of 2d**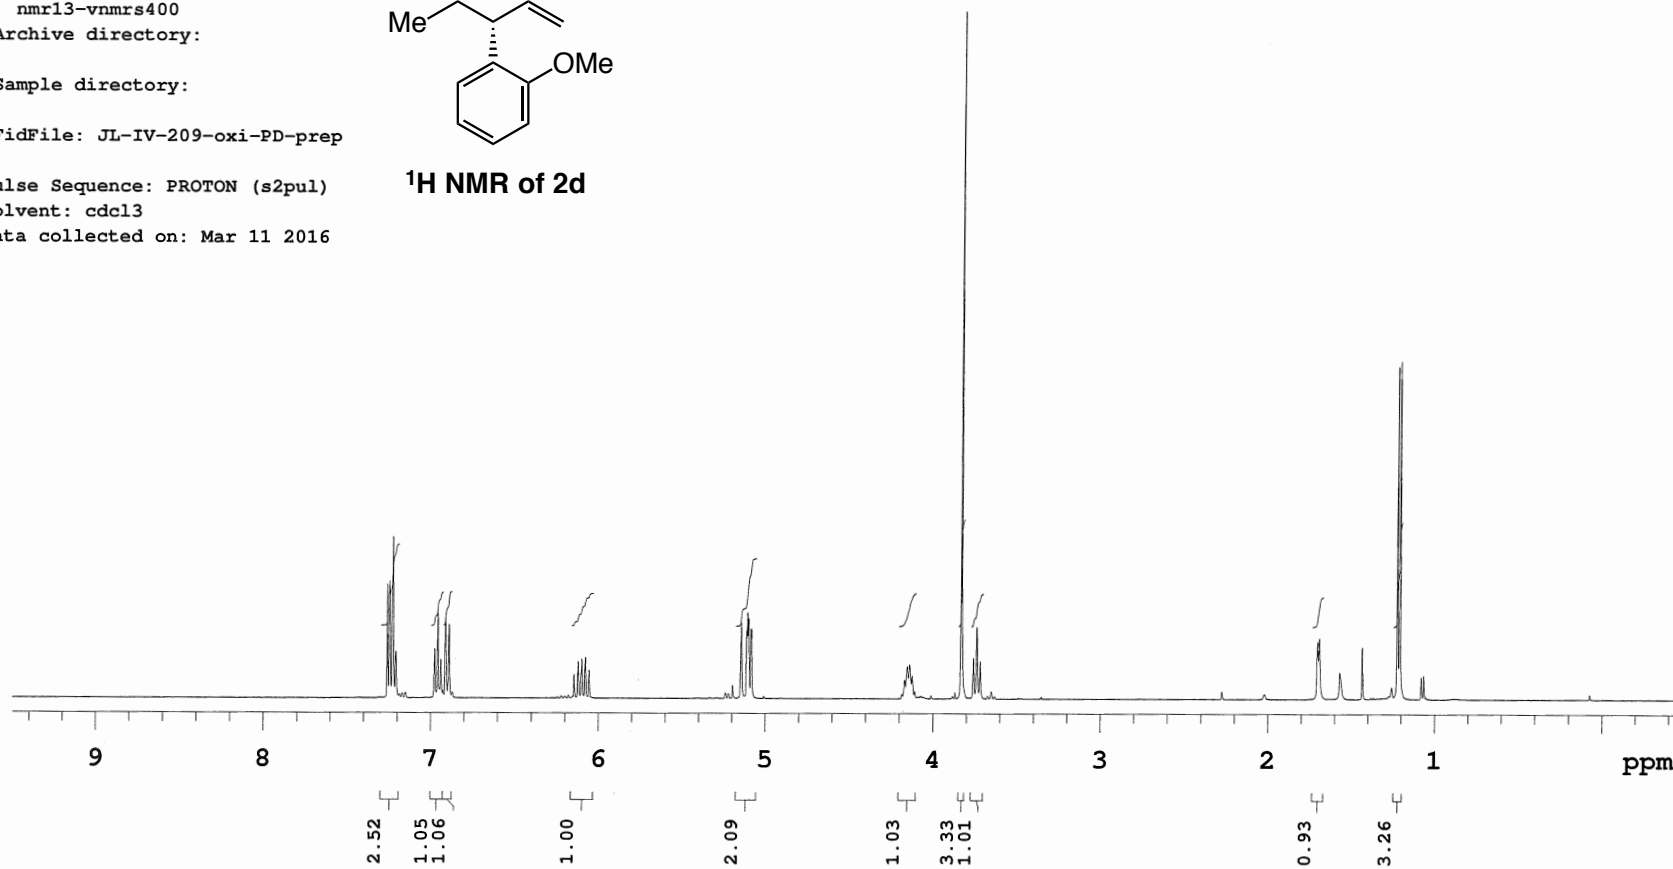

JL-IV-209-oxi-PD-C

Sample Name:

JL-IV-209-oxi-PD-C

Data Collected on:

nmr13-vnmrs400

Archive directory:

Sample directory:

FidFile: CARBON

Pulse Sequence: CARBON (s2pul)

Solvent: cdc13

Data collected on: Mar 13 2016

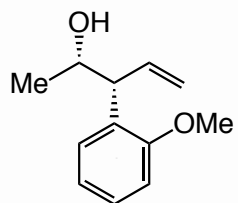

**<sup>13</sup>C NMR of 2d**

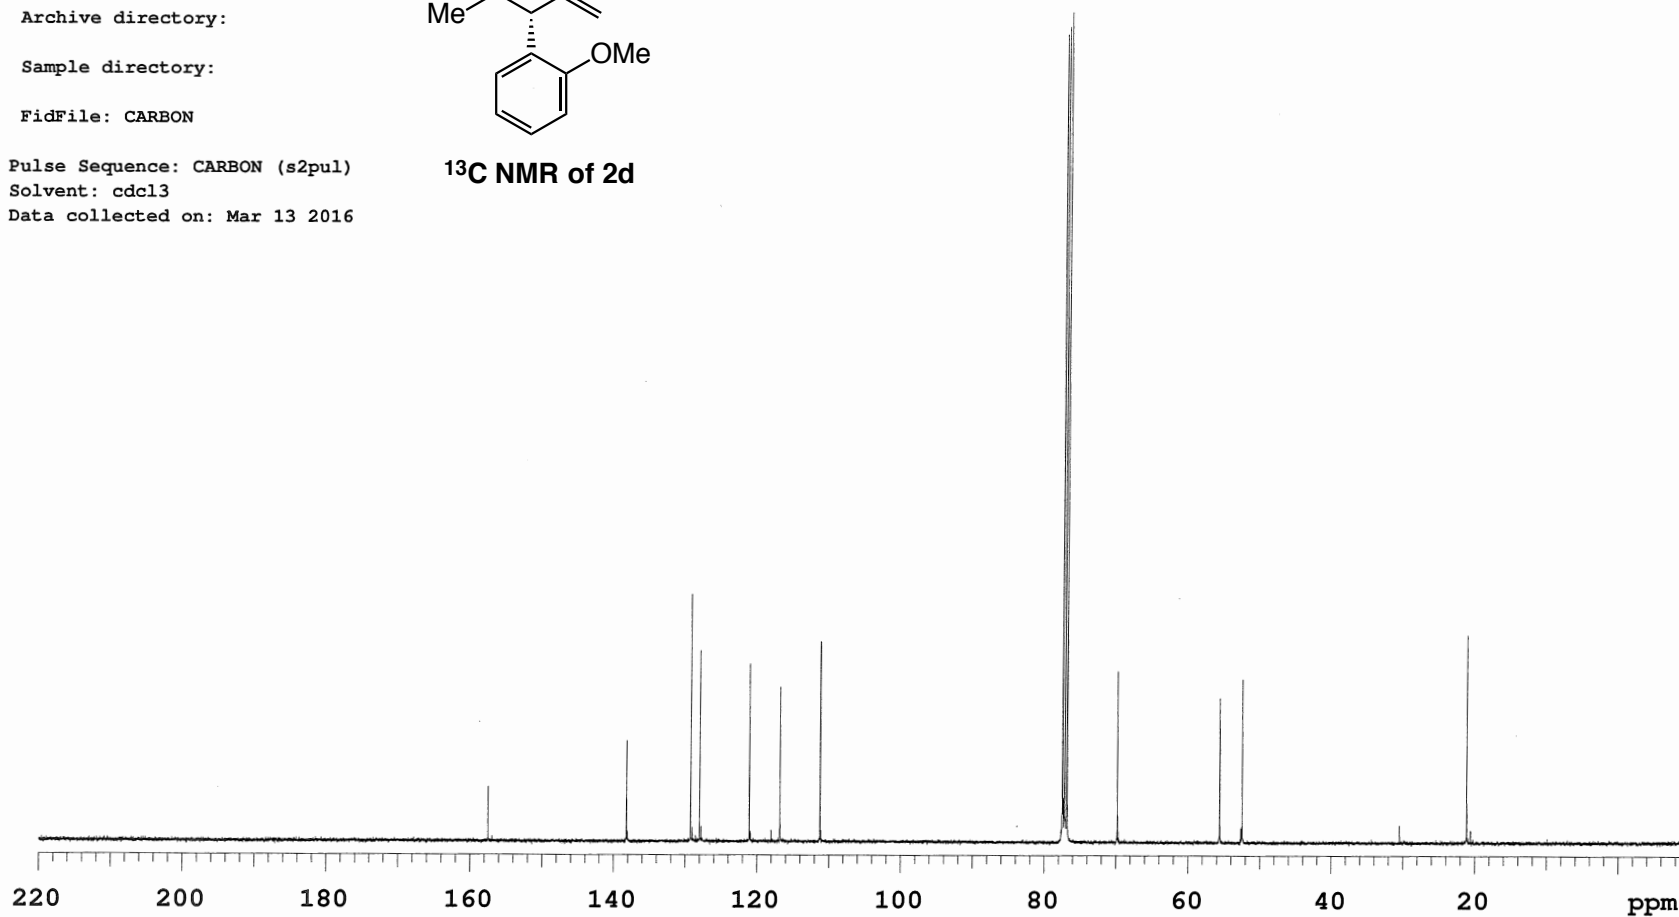



JL-IV-261-1-oxi-PD

Sample Name:

JL-IV-261-1-oxi-PD

Data Collected on:

nmr13-vnmrs400

Archive directory:

Sample directory:

FidFile: JL-IV-261-1-oxi-PD

Pulse Sequence: PROTON (s2pul)

Solvent: cdcl3

Data collected on: Apr 23 2016

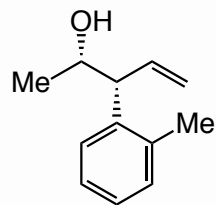

**<sup>1</sup>H NMR of 2e**

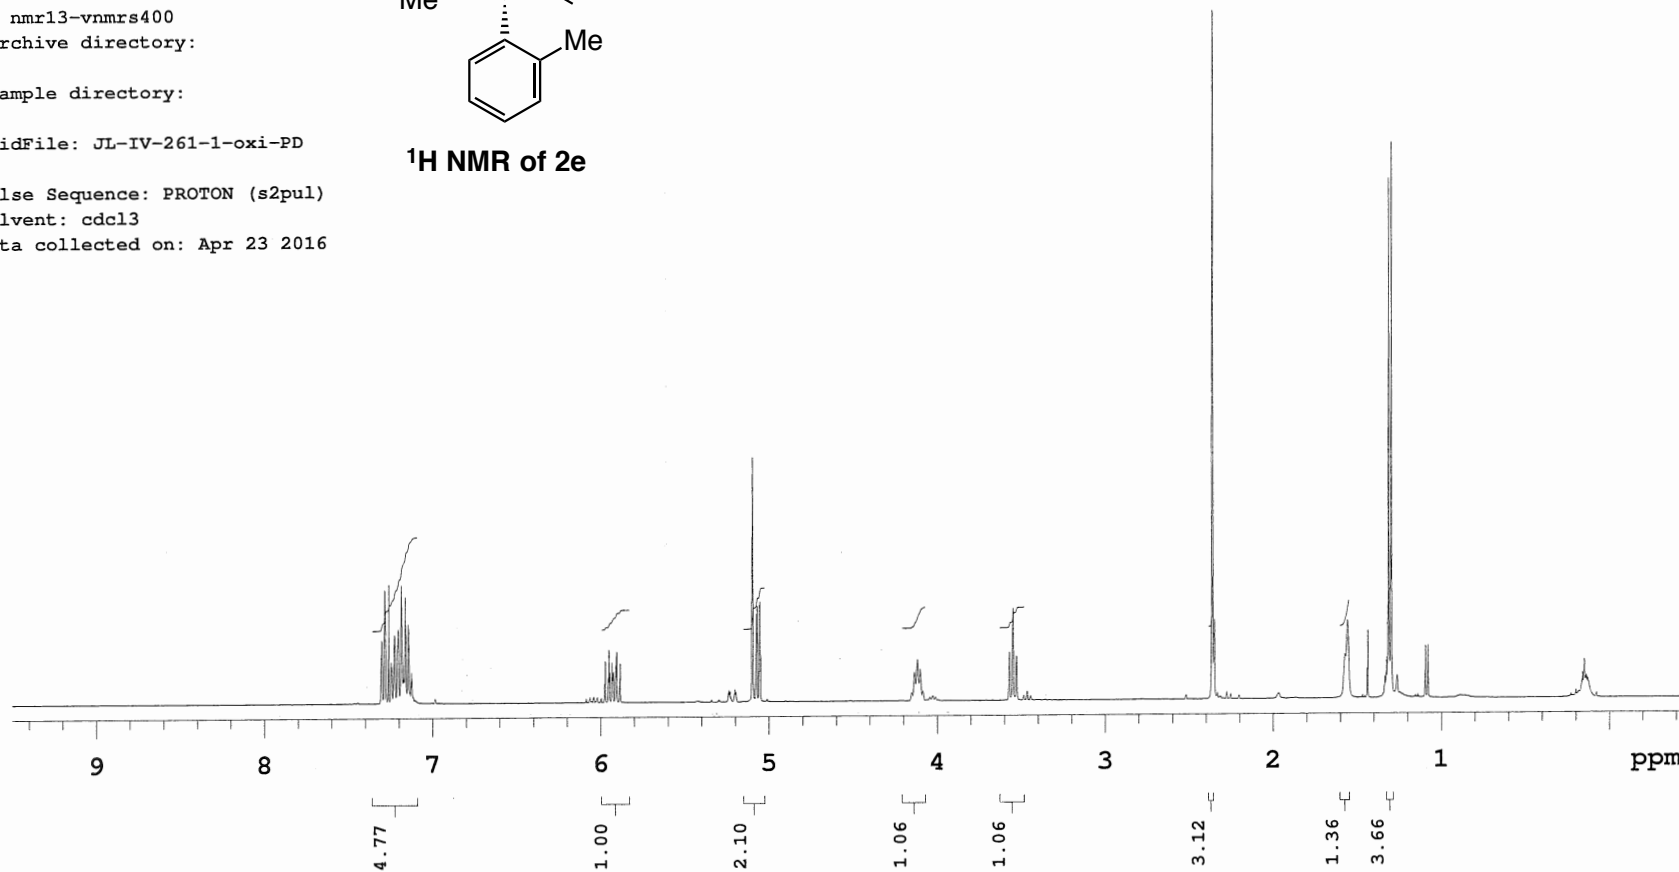

JL-IV-261PD-C

Sample Name:

JL-IV-261PD-C

Data Collected on:

nmr13-vnmrs400

Archive directory:

Sample directory:

FidFile: CARBON

Pulse Sequence: CARBON (s2pul)

Solvent: cdcl3

Data collected on: May 15 2016

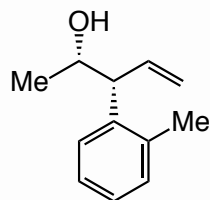

**<sup>13</sup>C NMR of 2e**

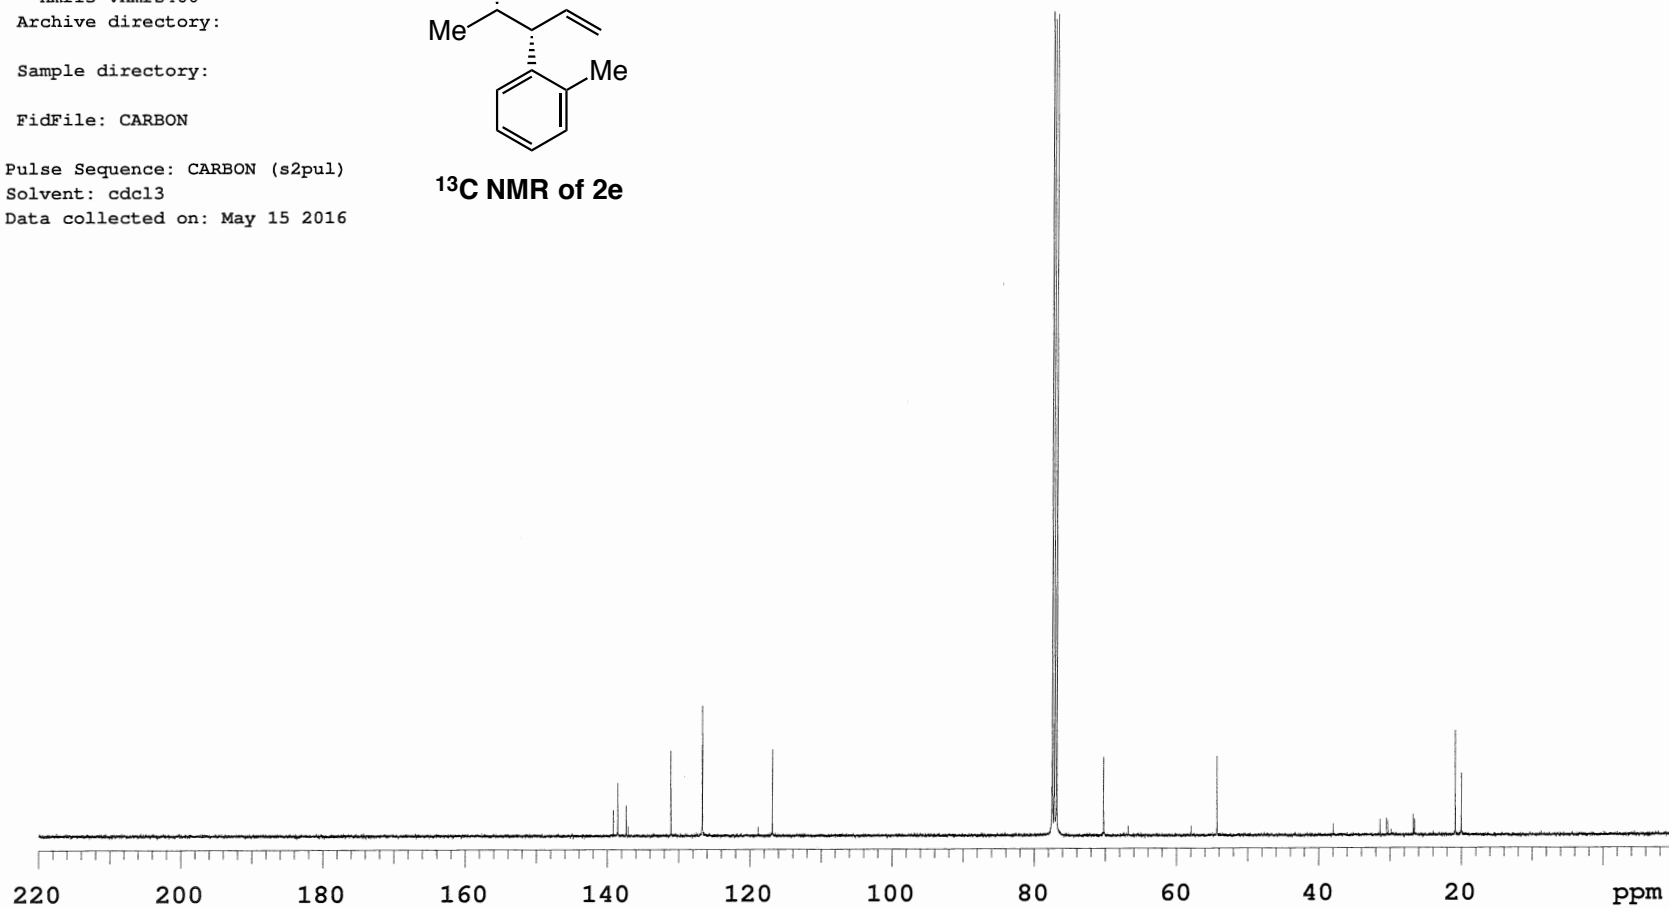

JL-IV-207-1-oxi-PD

Sample Name:  
 JL-IV-207-1-oxi-PD  
 Data Collected on:  
 nmr13-vnmrs400  
 Archive directory:

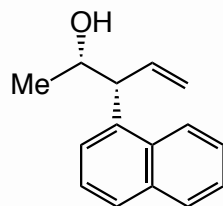

<sup>1</sup>H NMR of 2f

Sample directory:

FidFile: PROTON

Pulse Sequence: PROTON (s2pul)  
 Solvent: cdcl3  
 Data collected on: Mar 12 2016

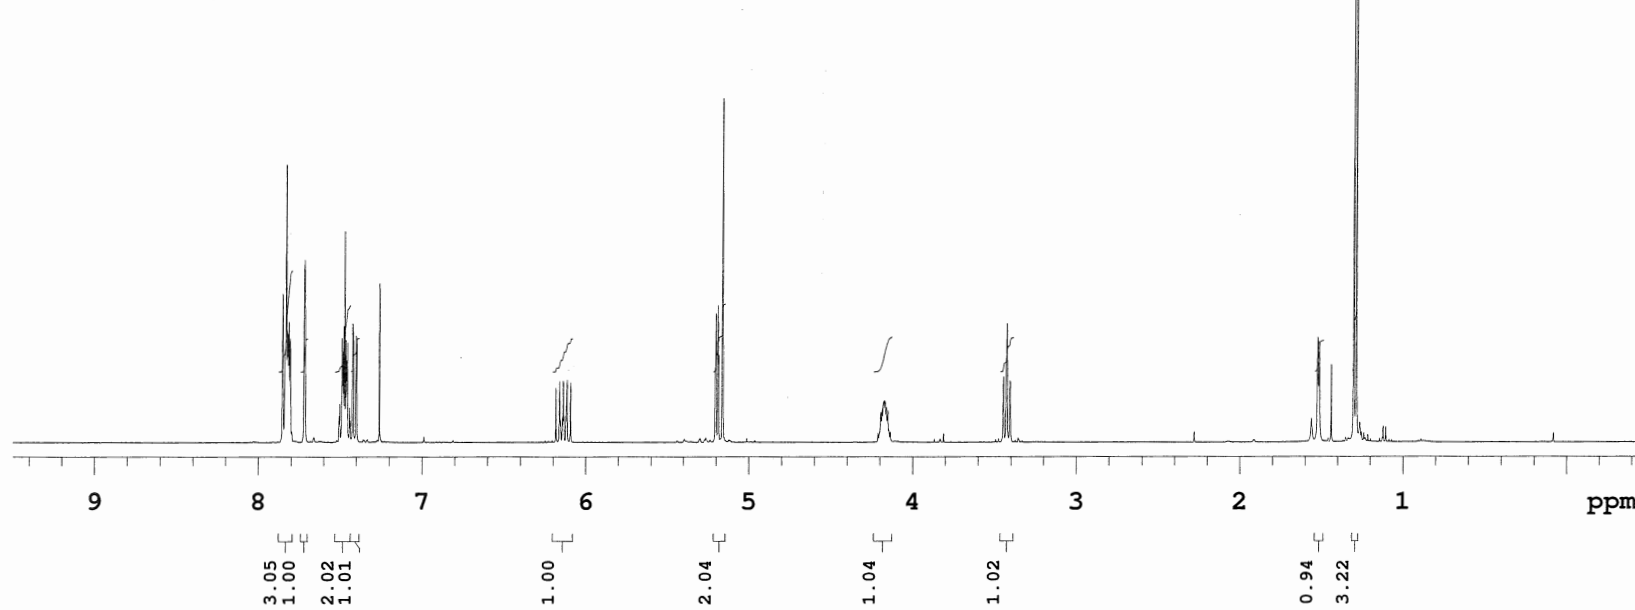

JL-IV-207-1-oxi-PD-C

Sample Name:

JL-IV-207-1-oxi-PD-C

Data Collected on:

nmr13-vnmrs400

Archive directory:

Sample directory:

FidFile: CARBON

Pulse Sequence: CARBON (s2pul)

Solvent: cdcl3

Data collected on: Mar 14 2016

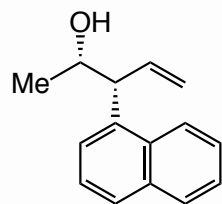

**<sup>13</sup>C NMR of 2f**

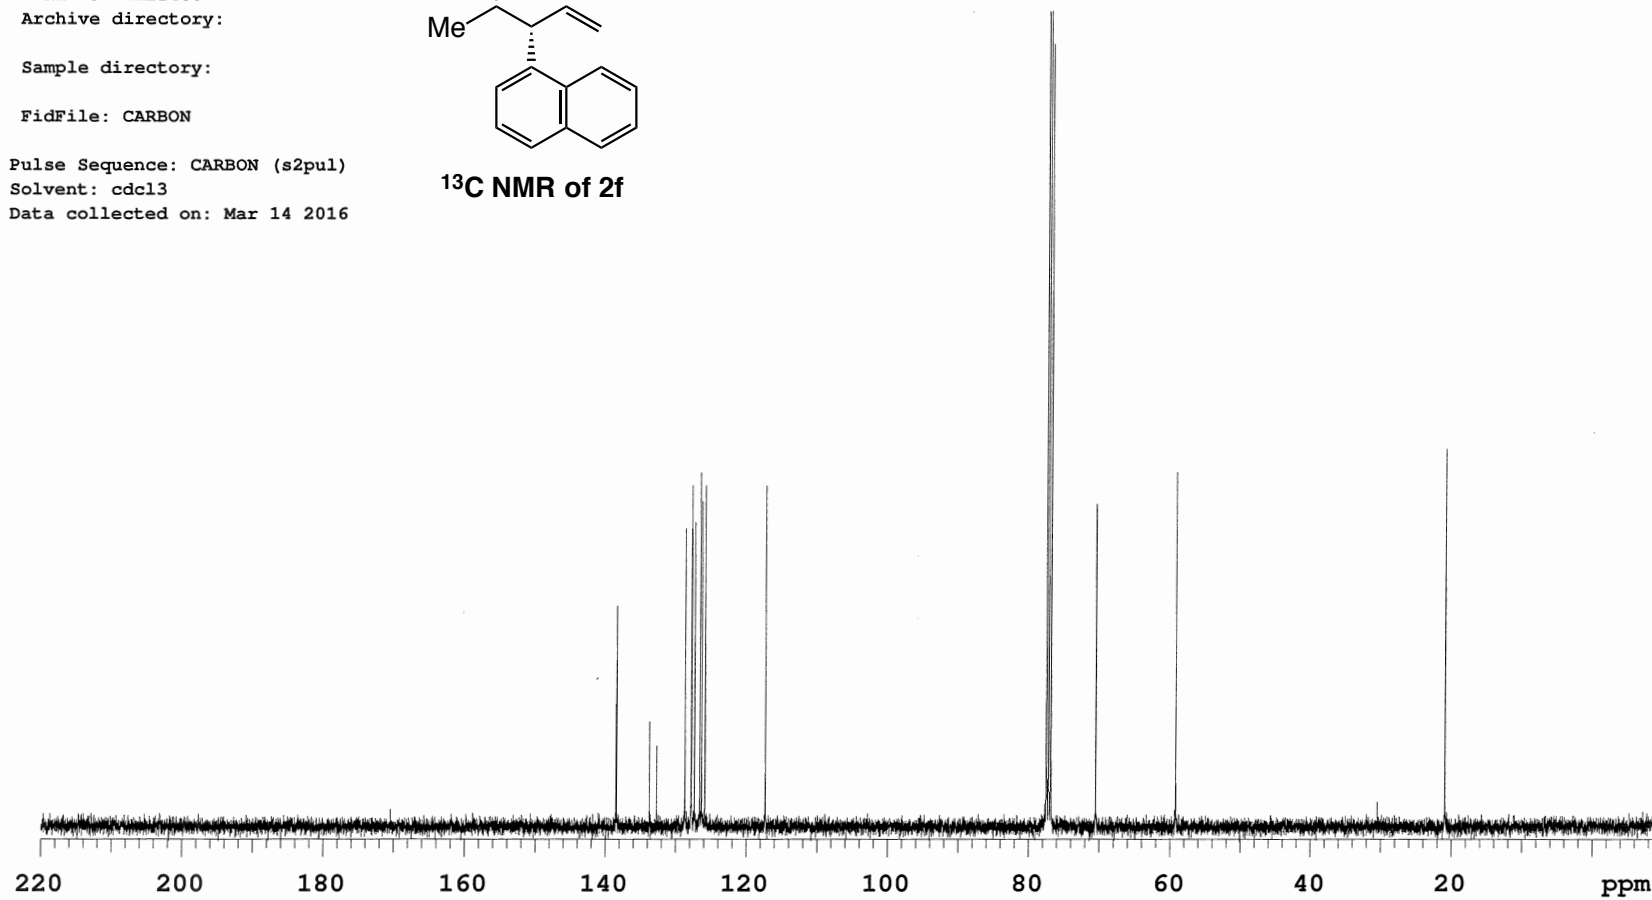

JL-IV-237-1-oxi-PD

Sample Name:

JL-IV-237-1-oxi-PD

Data Collected on:

nmr13-vnmrs400

Archive directory:

Sample directory:

FidFile: JL-IV-237-1-oxi-PD

Pulse Sequence: PROTON (s2pul)

Solvent: cdcl3

Data collected on: Apr 7 2016

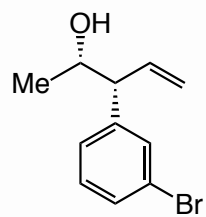**<sup>1</sup>H NMR of 2g**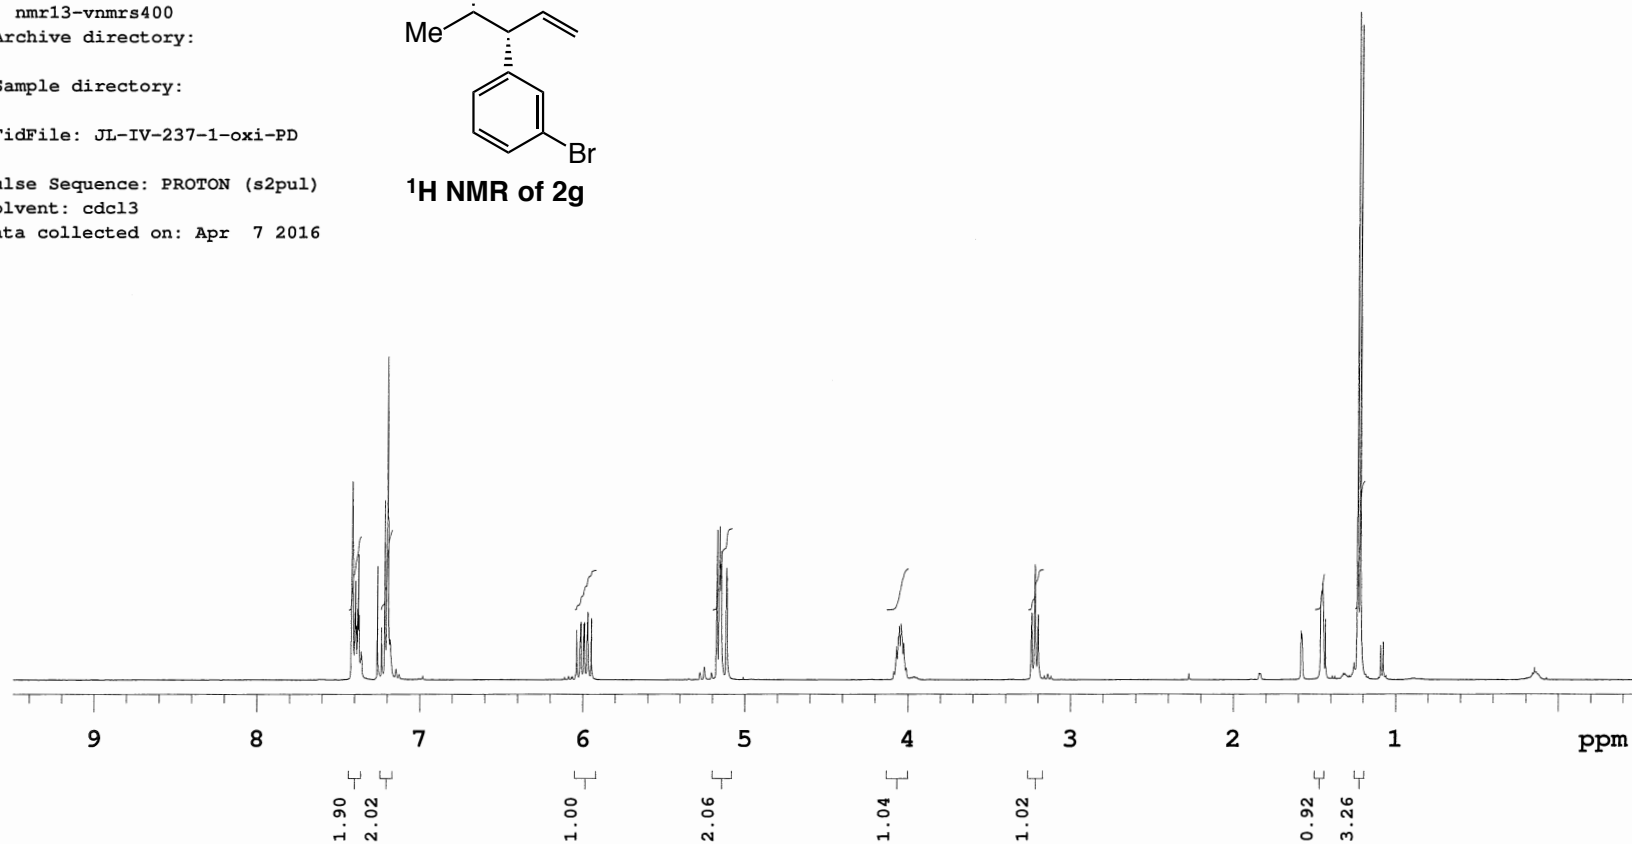

JL-IV-237-1-oxi-PD-C

Sample Name:

JL-IV-237-1-oxi-PD-C

Data Collected on:

nmr13-vnmrs400

Archive directory:

Sample directory:

FidFile: CARBON

Pulse Sequence: CARBON (s2pul)

Solvent: cdcl3

Data collected on: Apr 8 2016

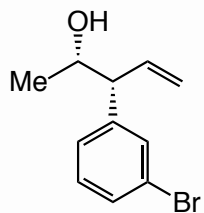

**<sup>13</sup>C NMR of 2g**

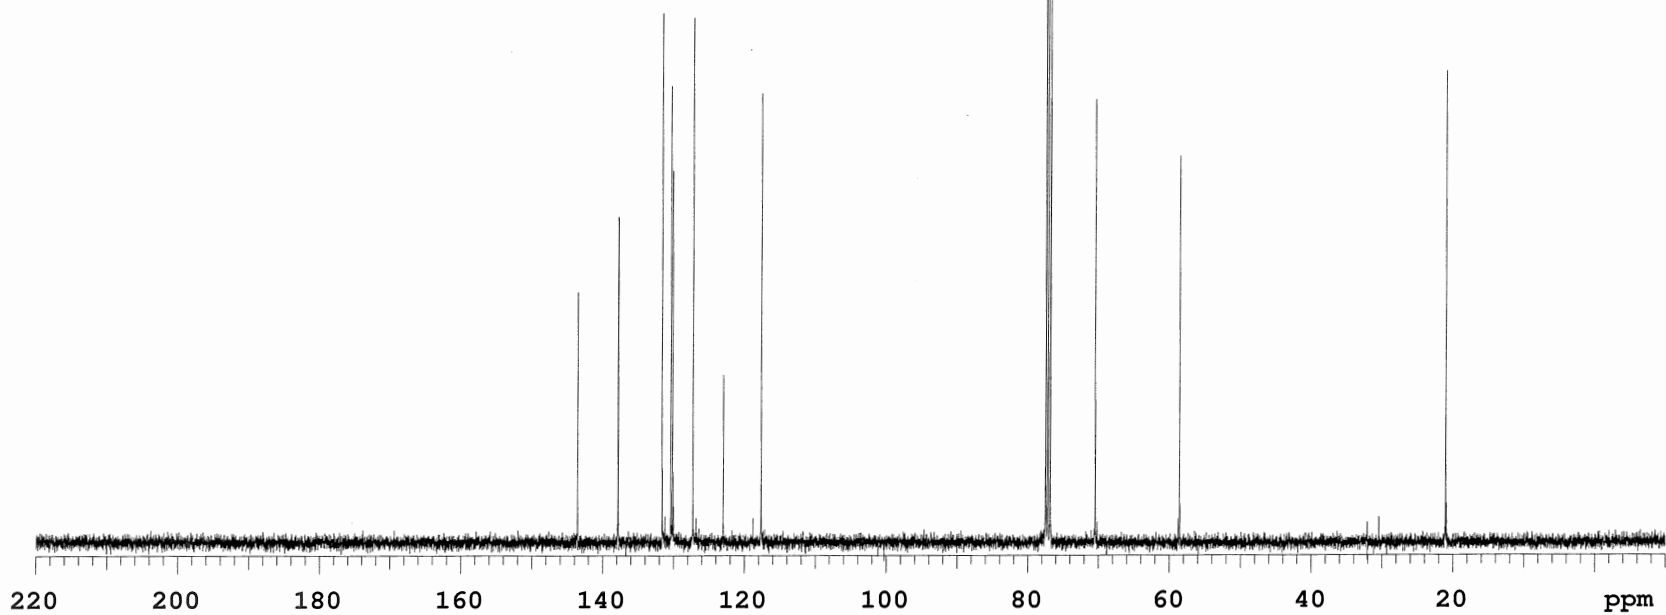

JL-IV-211-1-oxi-PD

Sample Name:

JL-IV-211-1-oxi-PD

Data Collected on:

nmr13-vnmrs400

Archive directory:

Sample directory:

FidFile: PROTON

Pulse Sequence: PROTON (s2pul)

Solvent: cdcl3

Data collected on: Mar 12 2016

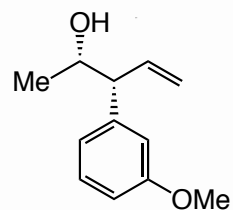

<sup>1</sup>H NMR of 2h

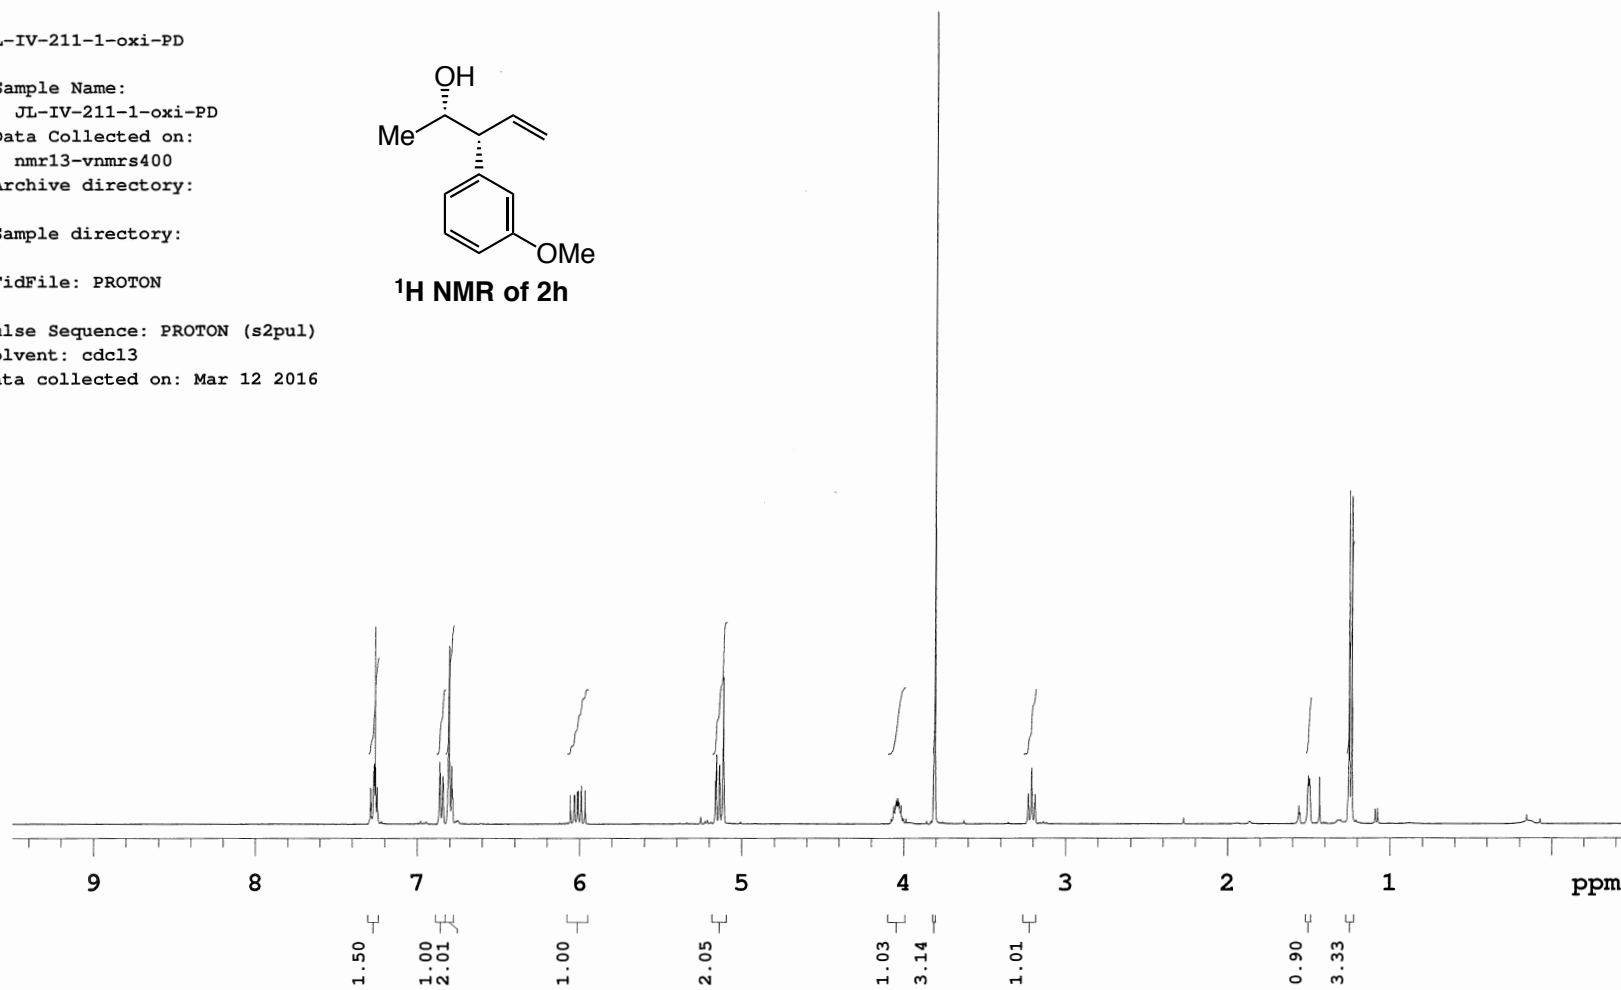

JL-IV-211-1-oxi-PD-C

Sample Name:

JL-IV-211-1-oxi-PD-C

Data Collected on:

nmr13-vnmrs400

Archive directory:

Sample directory:

FidFile: CARBON

Pulse Sequence: CARBON (s2pul)

Solvent: cdcl3

Data collected on: Mar 15 2016

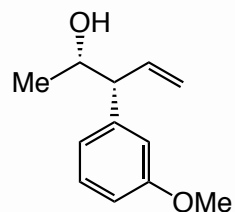

<sup>13</sup>C NMR of 2h

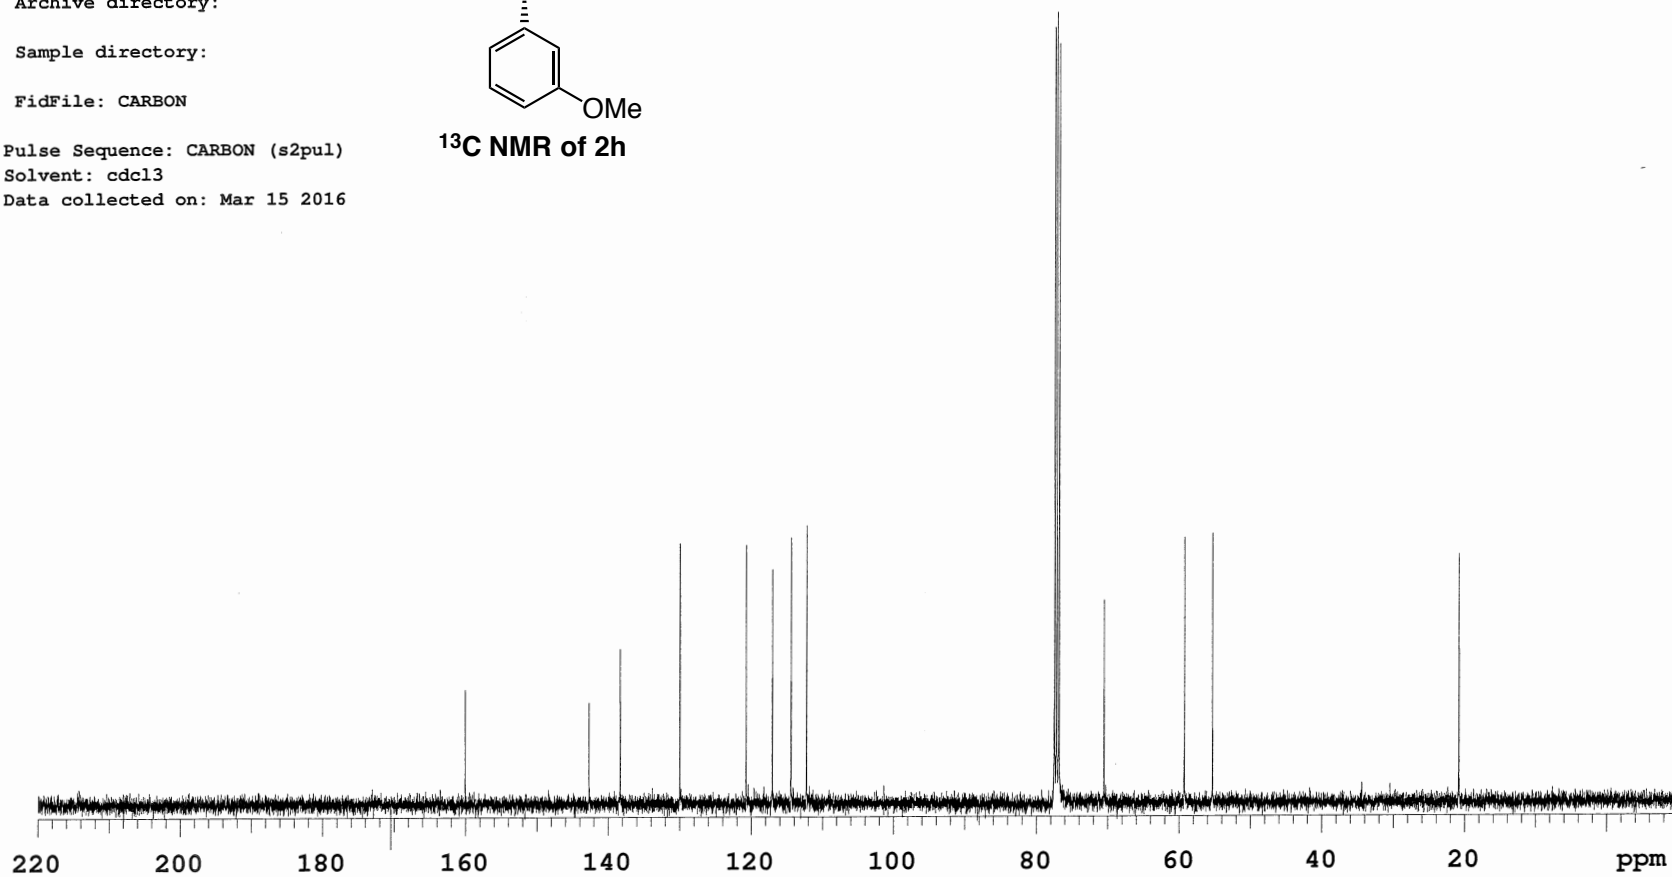



JL-IV-233-2-oxi-PD

Sample Name:

JL-IV-233-2-oxi-PD

Data Collected on:

nmr13-vnmrs400

Archive directory:

Sample directory:

FidFile: PROTON

Pulse Sequence: PROTON (s2pul)

Solvent: cdcl3

Data collected on: Apr 4 2016

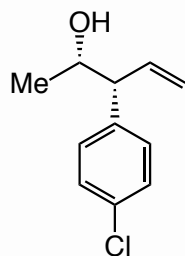

<sup>1</sup>H NMR of 2i

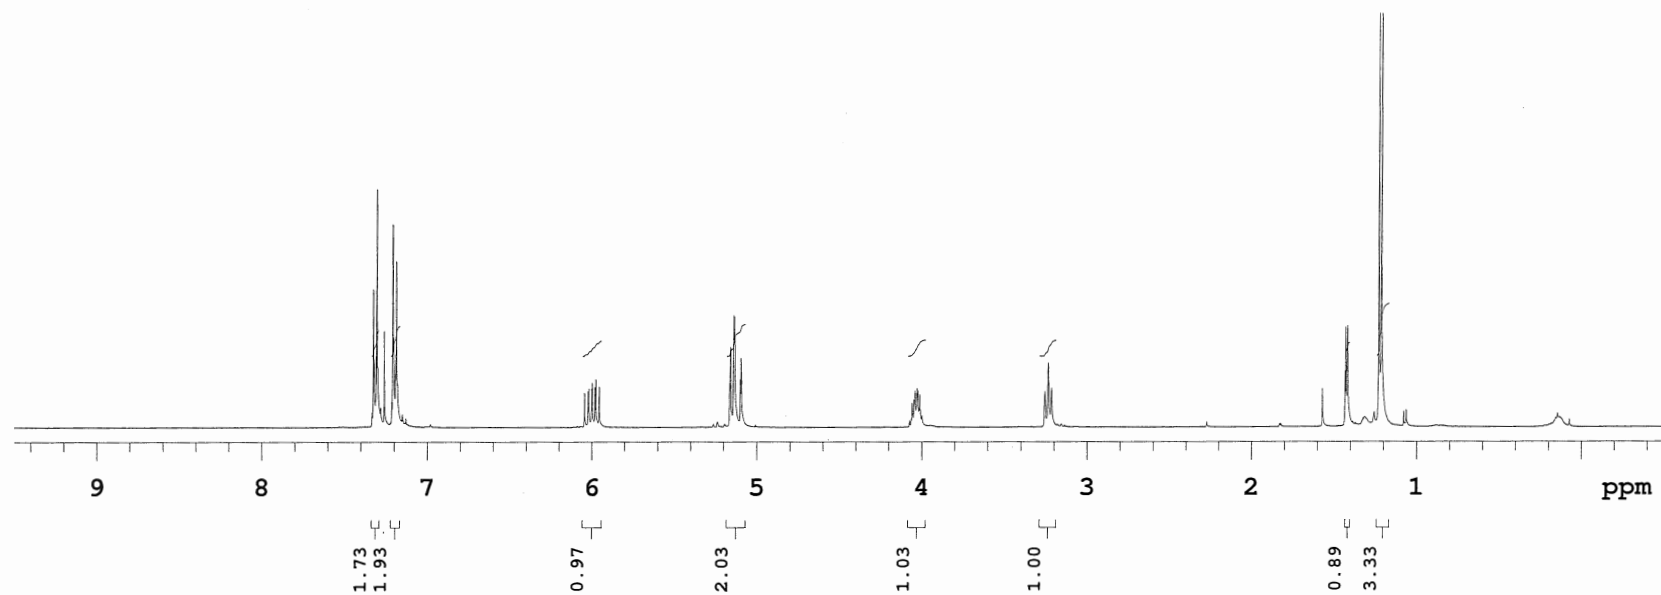

JL-IV-233-2-oxi-PD-C

Sample Name:

JL-IV-233-2-oxi-PD-C

Data Collected on:

nmr13-vnmrs400

Archive directory:

Sample directory:

FidFile: CARBON

Pulse Sequence: CARBON (s2pul)

Solvent: cdcl3

Data collected on: Apr 5 2016

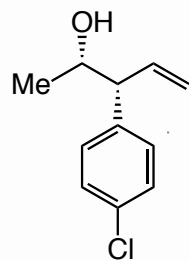

<sup>13</sup>C NMR of 2i

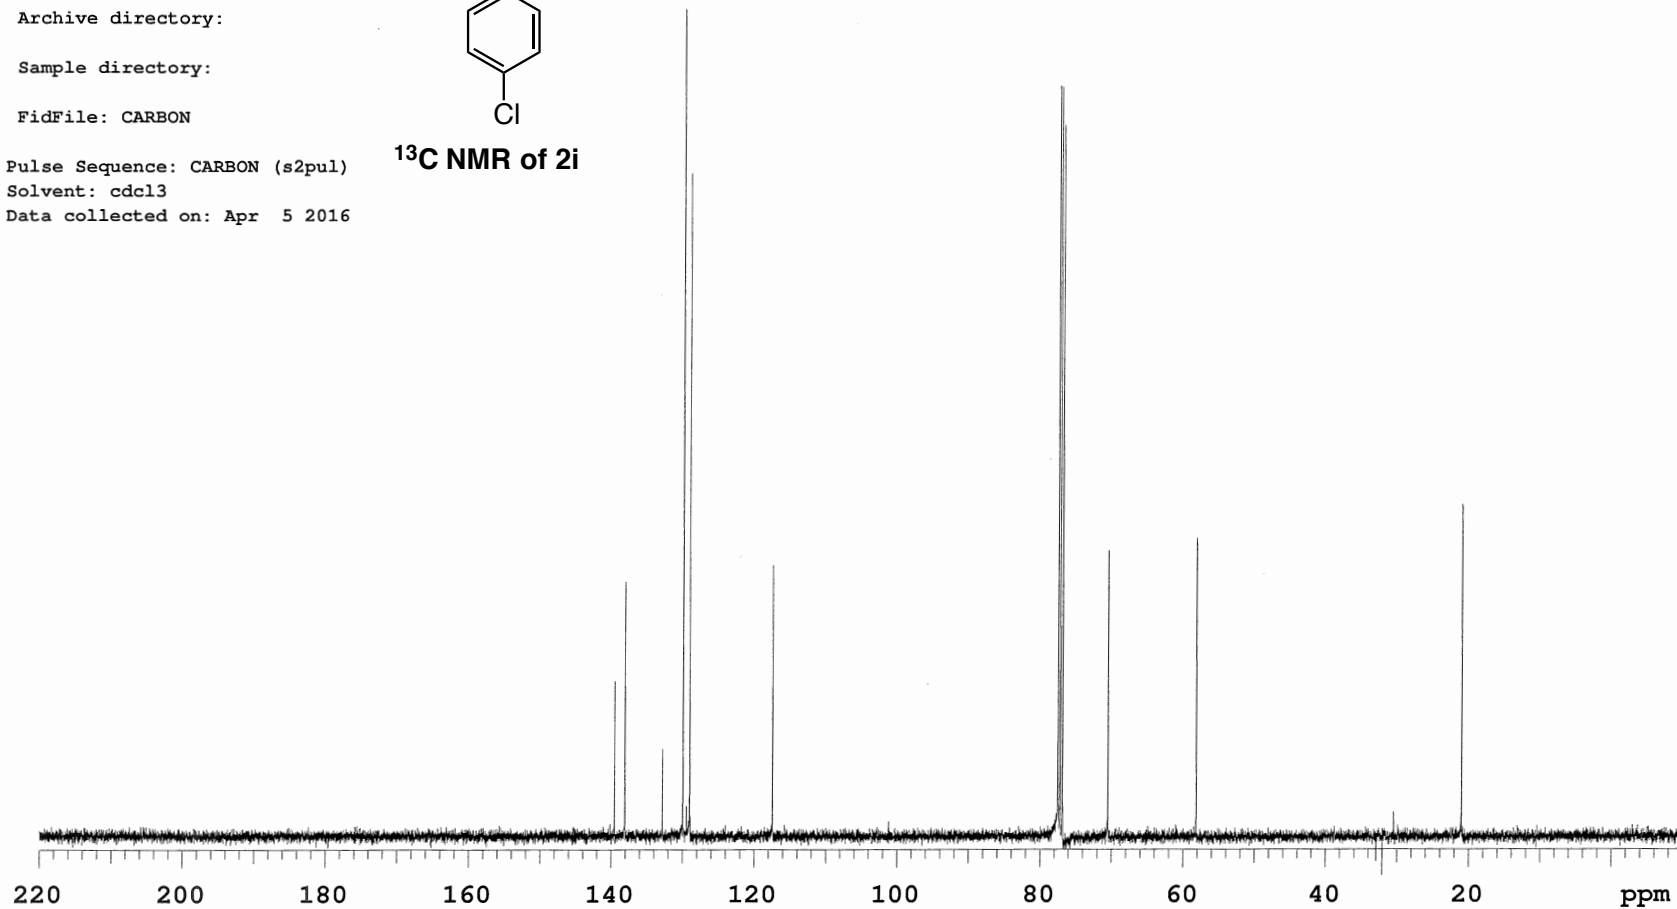

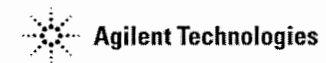

JL-V-6-1-oxi-PD

Sample Name:

JL-V-6-1-oxi-PD

Data Collected on:

nmr19-vnmrs600

Archive directory:

Sample directory:

FidFile: PROTON

Pulse Sequence: PROTON (s2pul)

Solvent: cdcl3

Data collected on: Jun 1 2016

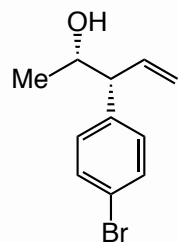

<sup>1</sup>H NMR of 2j

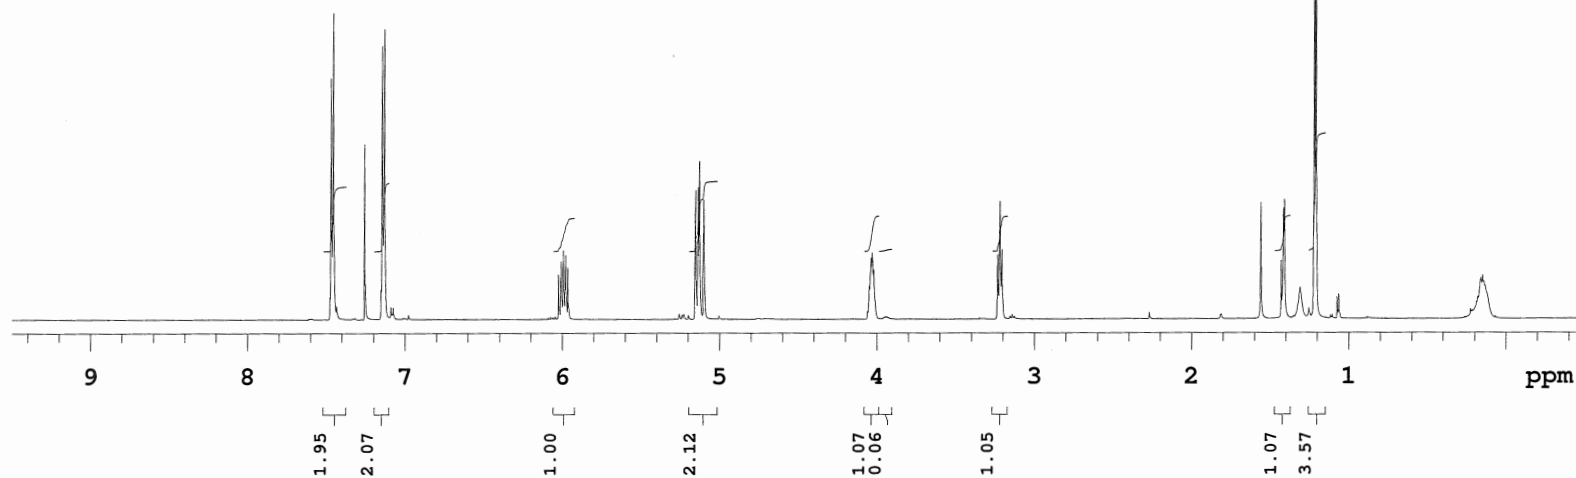

JL-V-6-PD-C

Sample Name:

JL-V-6-PD-C

Data Collected on:

nmr13-vnmrs400

Archive directory:

Sample directory:

FidFile: JL-V-6-PD-C

Pulse Sequence: CARBON (s2pul)

Solvent: cdcl3

Data collected on: Jun 2 2016

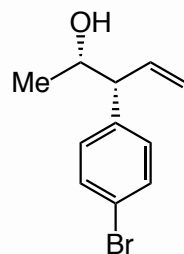

<sup>13</sup>C NMR of 2j

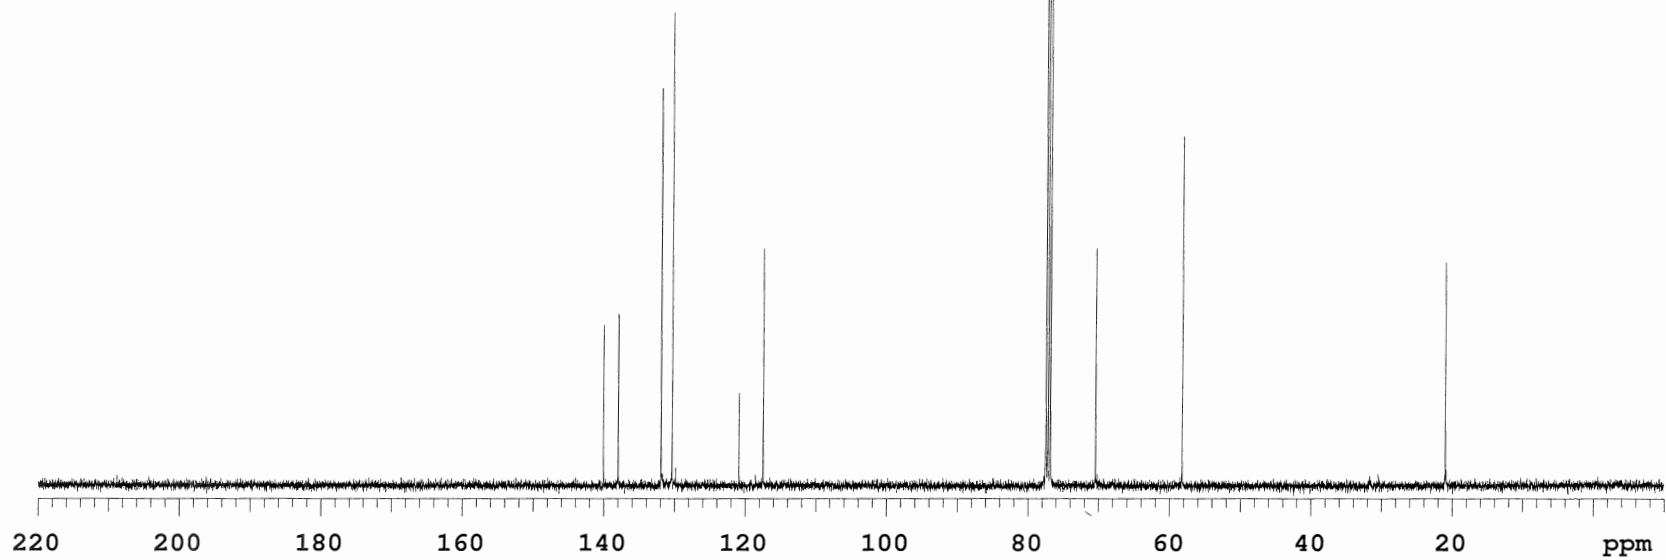

J1-IV-215-2-oxi-PD

Sample Name:

J1-IV-215-2-oxi-PD

Data Collected on:

nmr13-vnmrs400

Archive directory:

Sample directory:

FidFile: PROTON

Pulse Sequence: PROTON (s2pul)

Solvent: cdcl3

Data collected on: Mar 18 2016

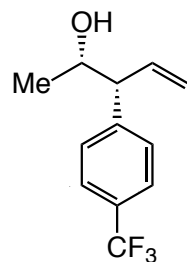

<sup>1</sup>H NMR of 2k

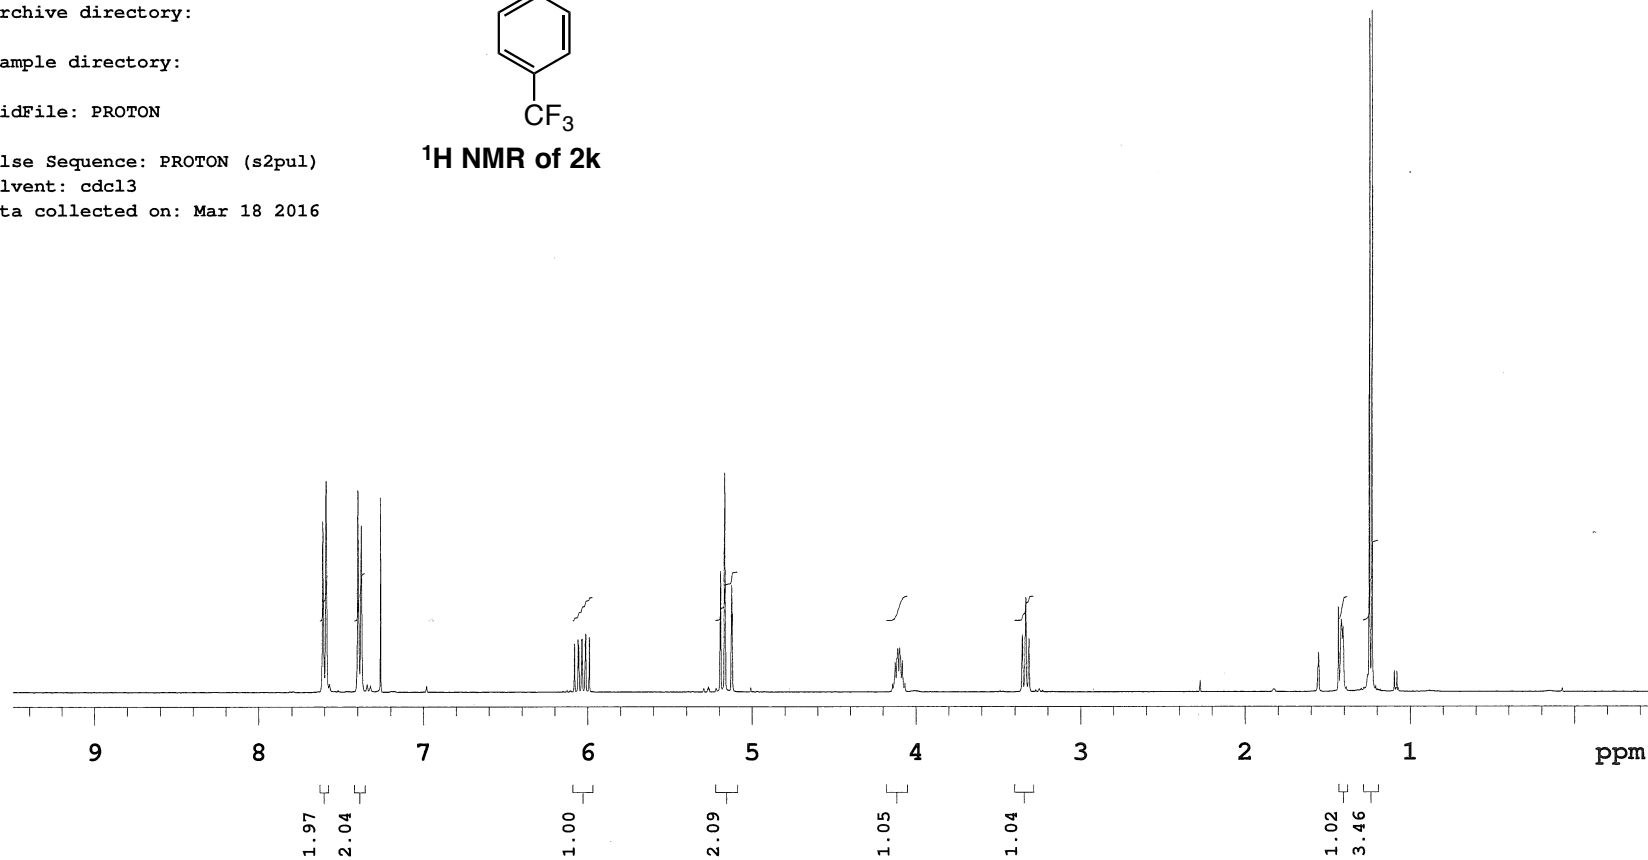

JL-IV-215-2-oxi-PD-C

Sample Name:

Data Collected on:  
nmr13-vnmrs400

Archive directory:

Sample directory:

FidFile: CARBON

Pulse Sequence: CARBON (s2pul)

Solvent: cdcl3

Data collected on: Mar 19 2016

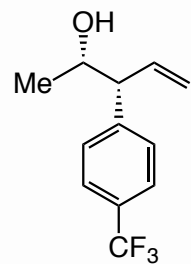

<sup>13</sup>C NMR of 2k

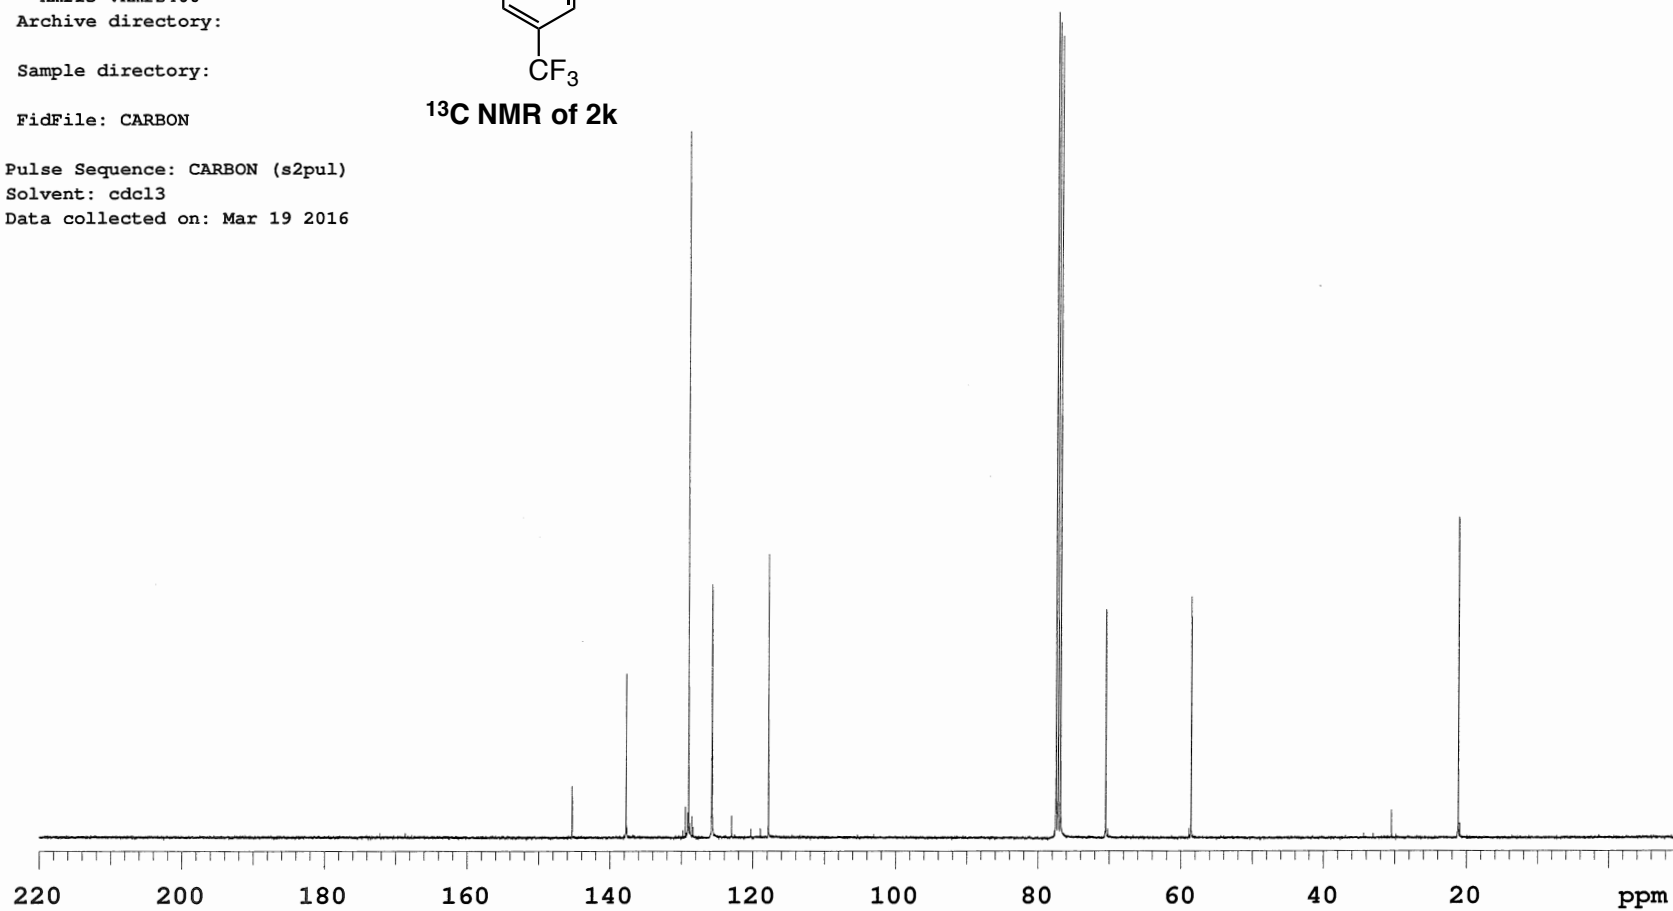

JL-IV-231-2-oxi-PD

Sample Name:

JL-IV-231-2-oxi-PD

Data Collected on:

nmr13-vnmrs400

Archive directory:

Sample directory:

FidFile: PROTON

Pulse Sequence: PROTON (s2pul)

Solvent: cdcl3

Data collected on: Apr 2 2016

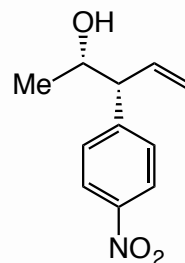

**<sup>1</sup>H NMR of 2I**

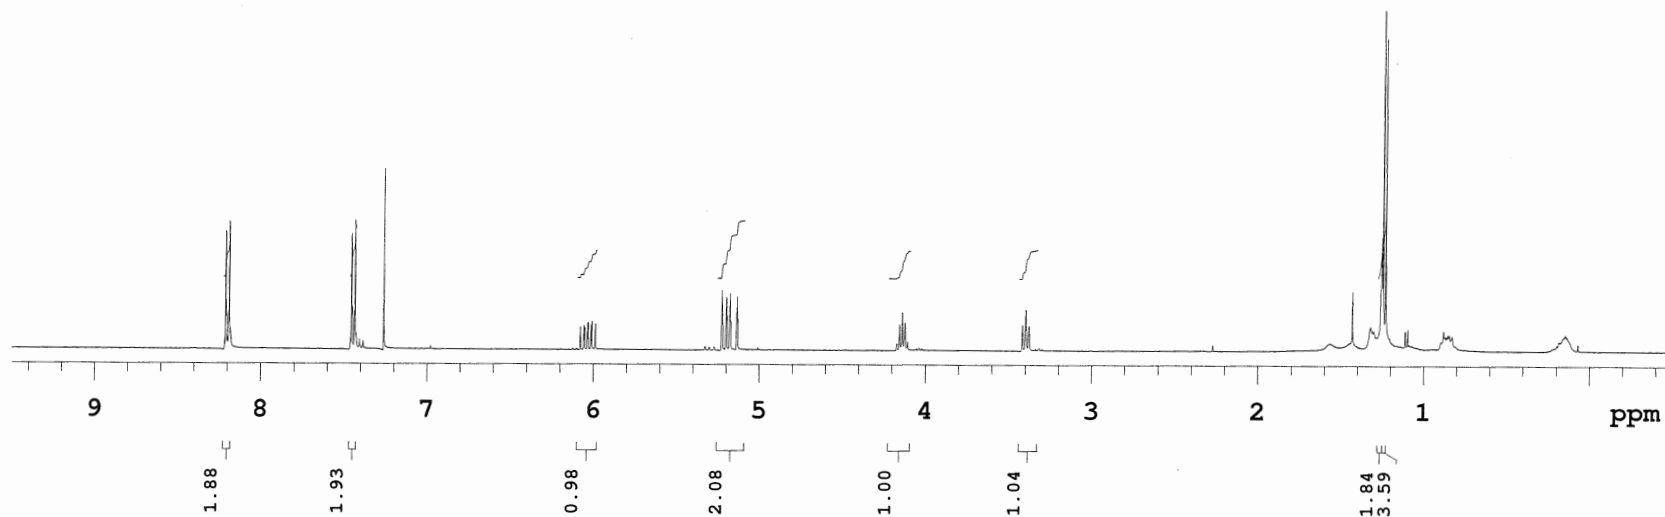

JL-IV-232-2-oxi-PD-C

Sample Name:

JL-IV-232-2-oxi-PD-C

Data Collected on:

nmr13-vnmrs400

Archive directory:

Sample directory:

FidFile: CARBON

Pulse Sequence: CARBON (s2pul)

Solvent: cdcl3

Data collected on: Apr 3 2016

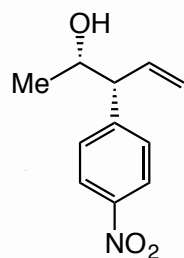

**<sup>13</sup>C NMR of 2I**

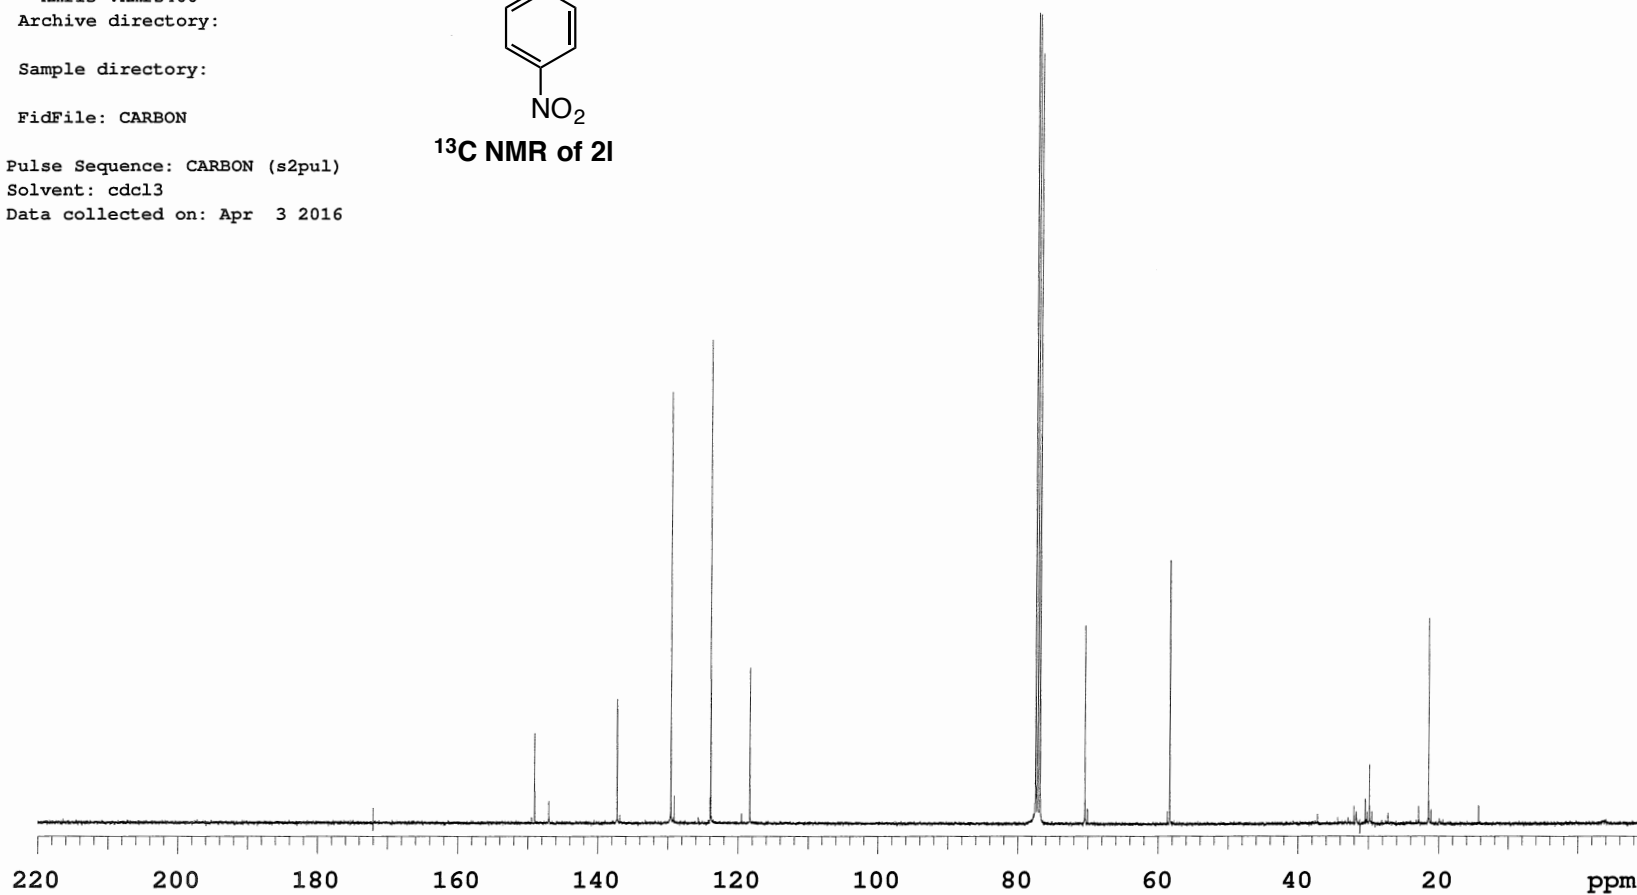



JL-V-86-2-oxi-PD

Sample Name:

JL-V-86-2-oxi-PD

Data Collected on:

nmr13-vnmrs400

Archive directory:

Sample directory:

FidFile: PROTON

Pulse Sequence: PROTON (s2pul)

Solvent: cdcl3

Data collected on: Aug 19 2016

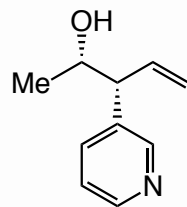

**<sup>1</sup>H NMR of 4**

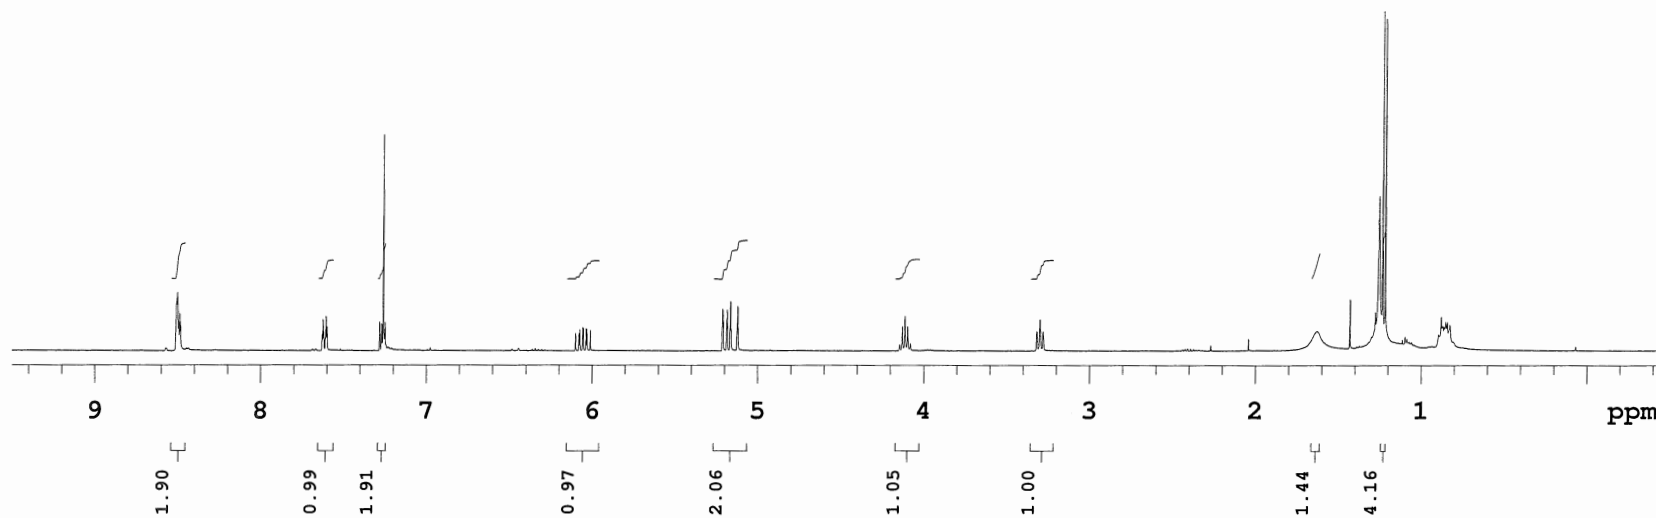

JL-V-86-2-oxi-PD-C

Sample Name:

JL-V-86-2-oxi-PD-C

Data Collected on:

nmr13-vnmrs400

Archive directory:

Sample directory:

FidFile: CARBON

Pulse Sequence: CARBON (s2pul)

Solvent: cdcl3

Data collected on: Aug 20 2016

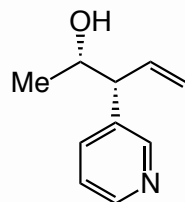

**<sup>13</sup>C NMR of 4**

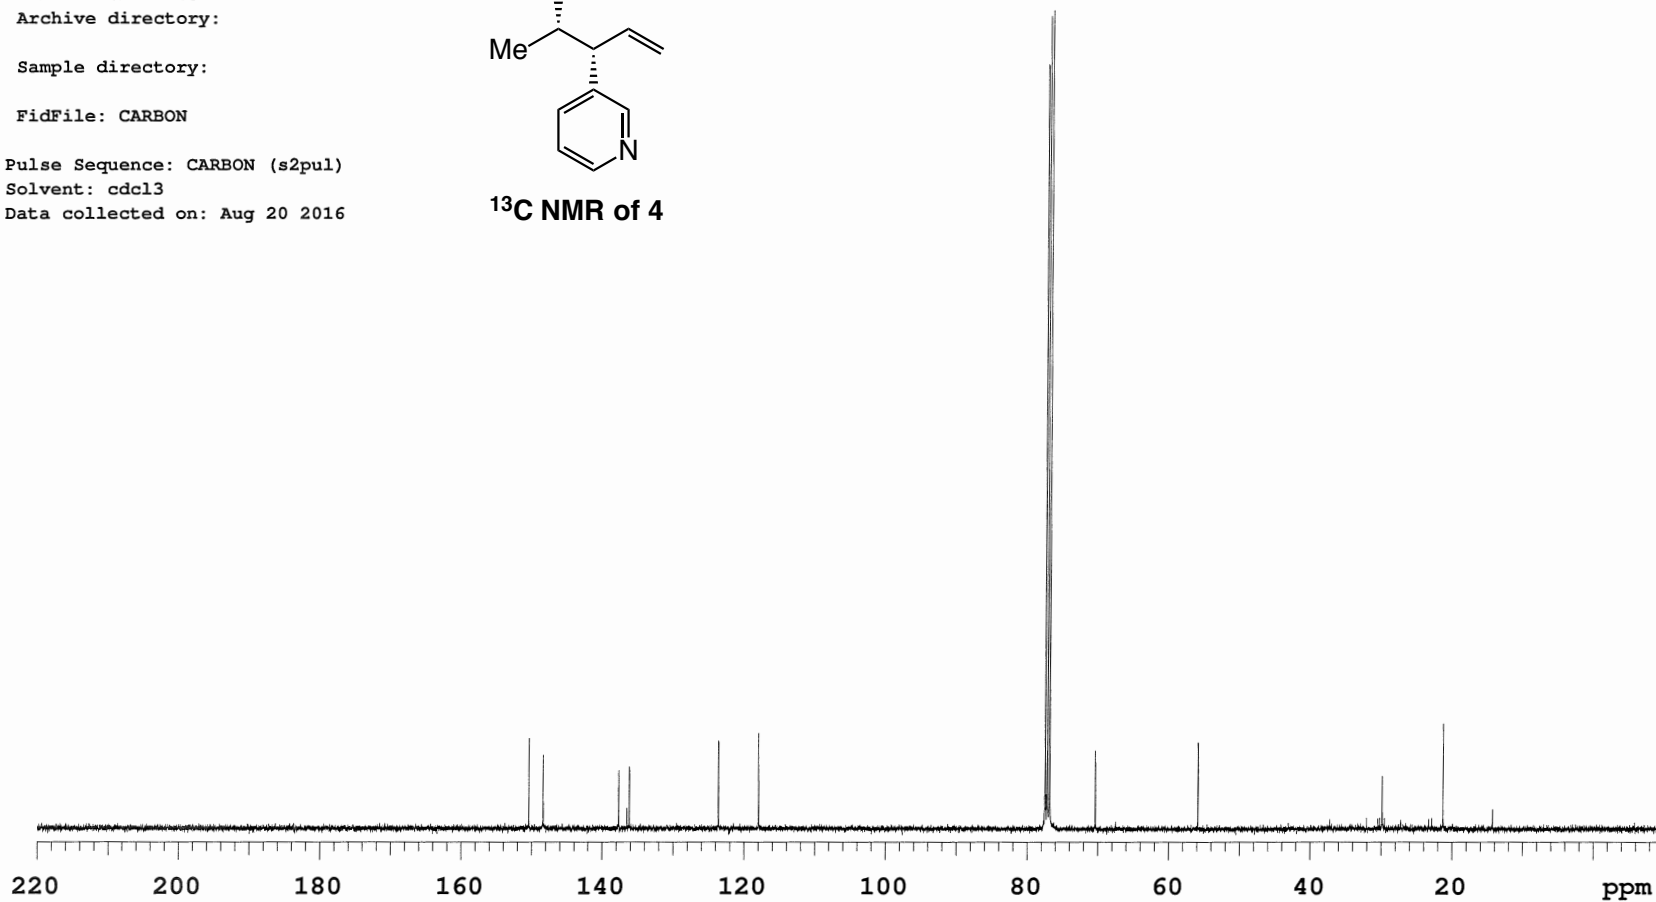

JL-V-38-2-oxi-PD

Sample Name:  
 JL-V-38-2-oxi-PD  
 Data Collected on:  
 nmr13-vnmrs400  
 Archive directory:

Sample directory:

FidFile: PROTON

Pulse Sequence: PROTON (s2pul)  
 Solvent: cdcl3  
 Data collected on: Jul 5 2016

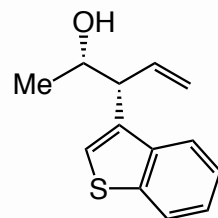

**<sup>1</sup>H NMR of 5**

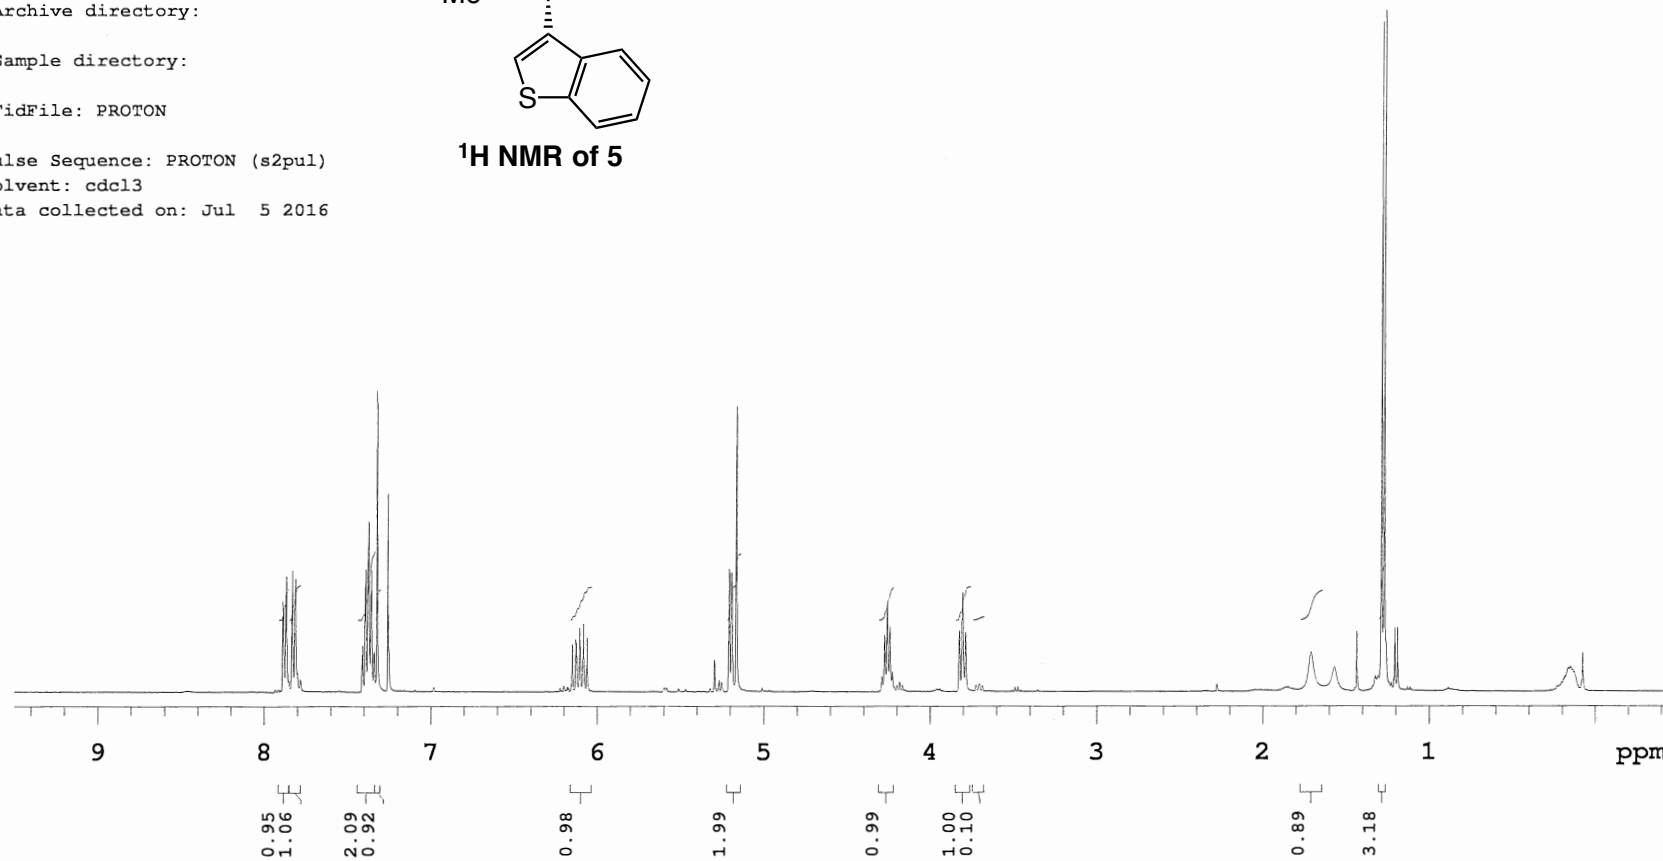

JL-V-38-2-oxi-PD-C

Sample Name:

JL-V-38-2-oxi-PD-C

Data Collected on:

nmr13-vnmrs400

Archive directory:

Sample directory:

FidFile: CARBON

Pulse Sequence: CARBON (s2pul)

Solvent: cdcl3

Data collected on: Jul 6 2016

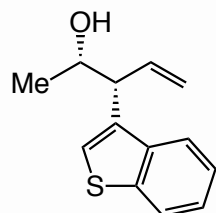

**<sup>13</sup>C NMR of 5**

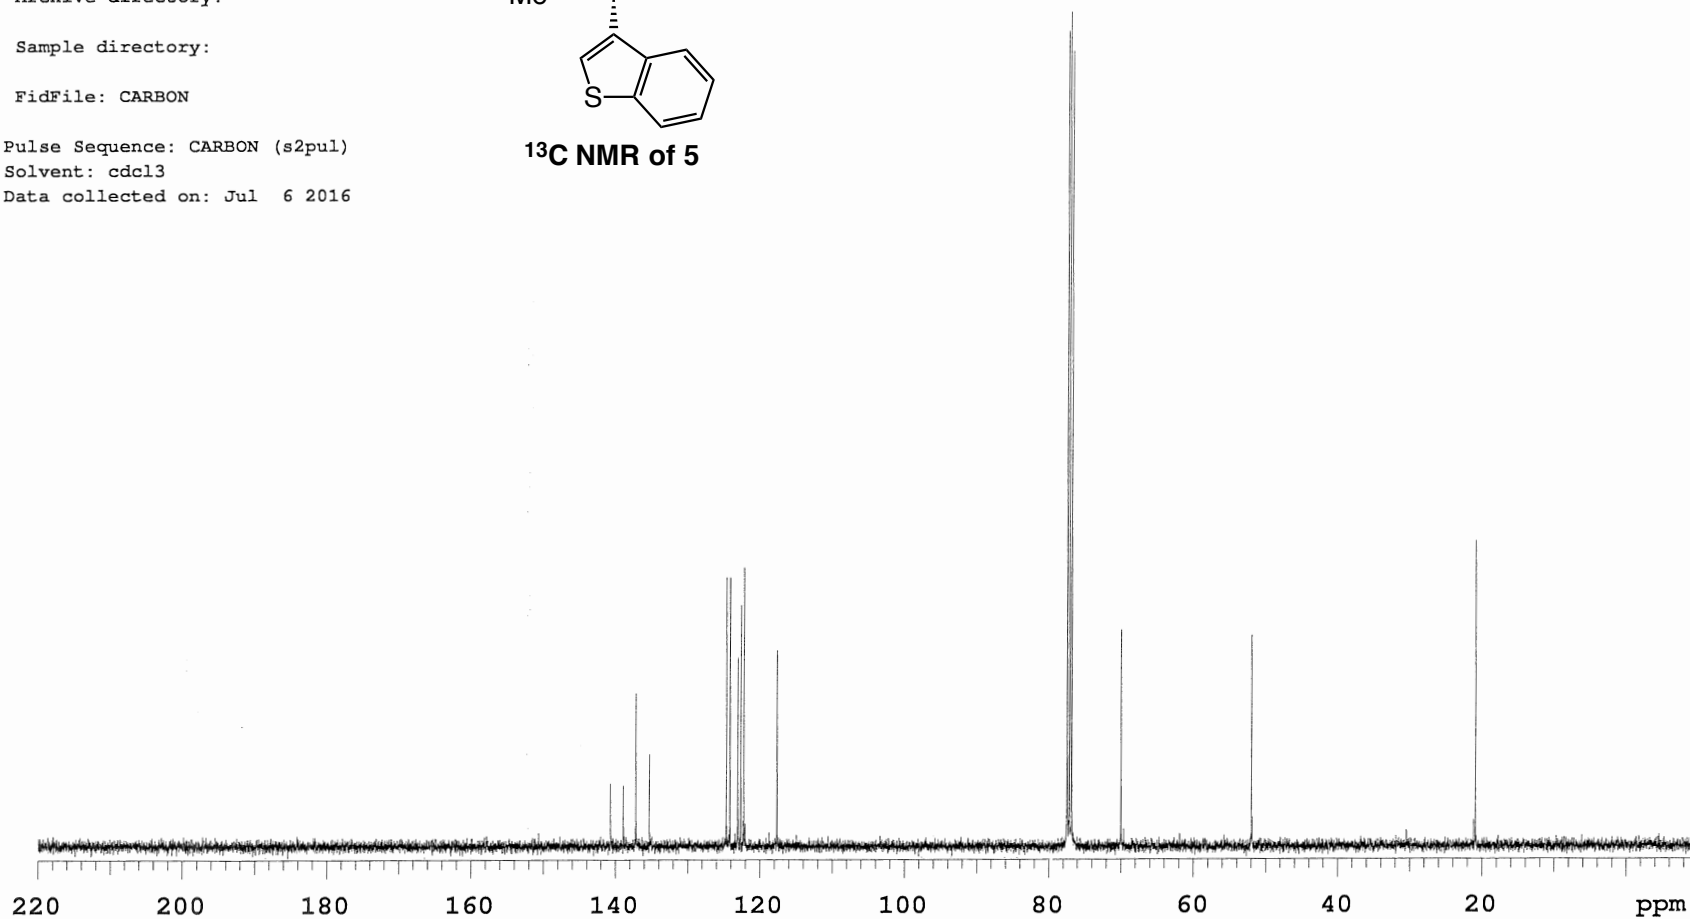

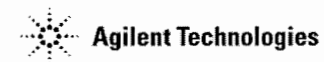

JL-V-66PD

Sample Name:

JL-V-66PD

Data Collected on:

nmr18-vnmrs500

Archive directory:

Sample directory:

FidFile: PROTON

Pulse Sequence: PROTON (s2pul)

Solvent: cdcl3

Data collected on: Aug 4 2016

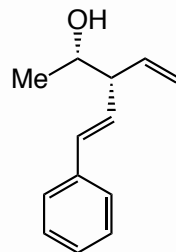

<sup>1</sup>H NMR of 6

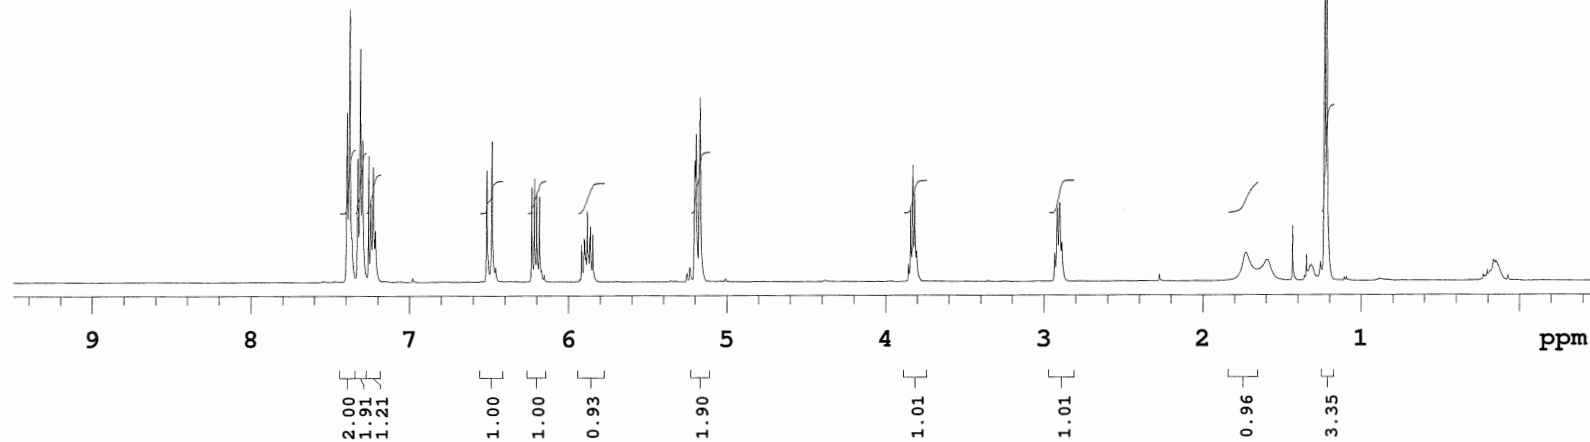

JL-V-66PD

Sample Name:

JL-V-66PD

Data Collected on:

nmr13-vnmrs400

Archive directory:

Sample directory:

FidFile: CARBON

Pulse Sequence: CARBON (s2pul)

Solvent: cdcl3

Data collected on: Aug 4 2016

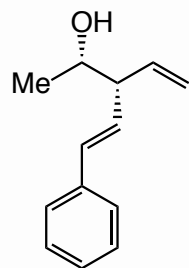

<sup>13</sup>C NMR of 6

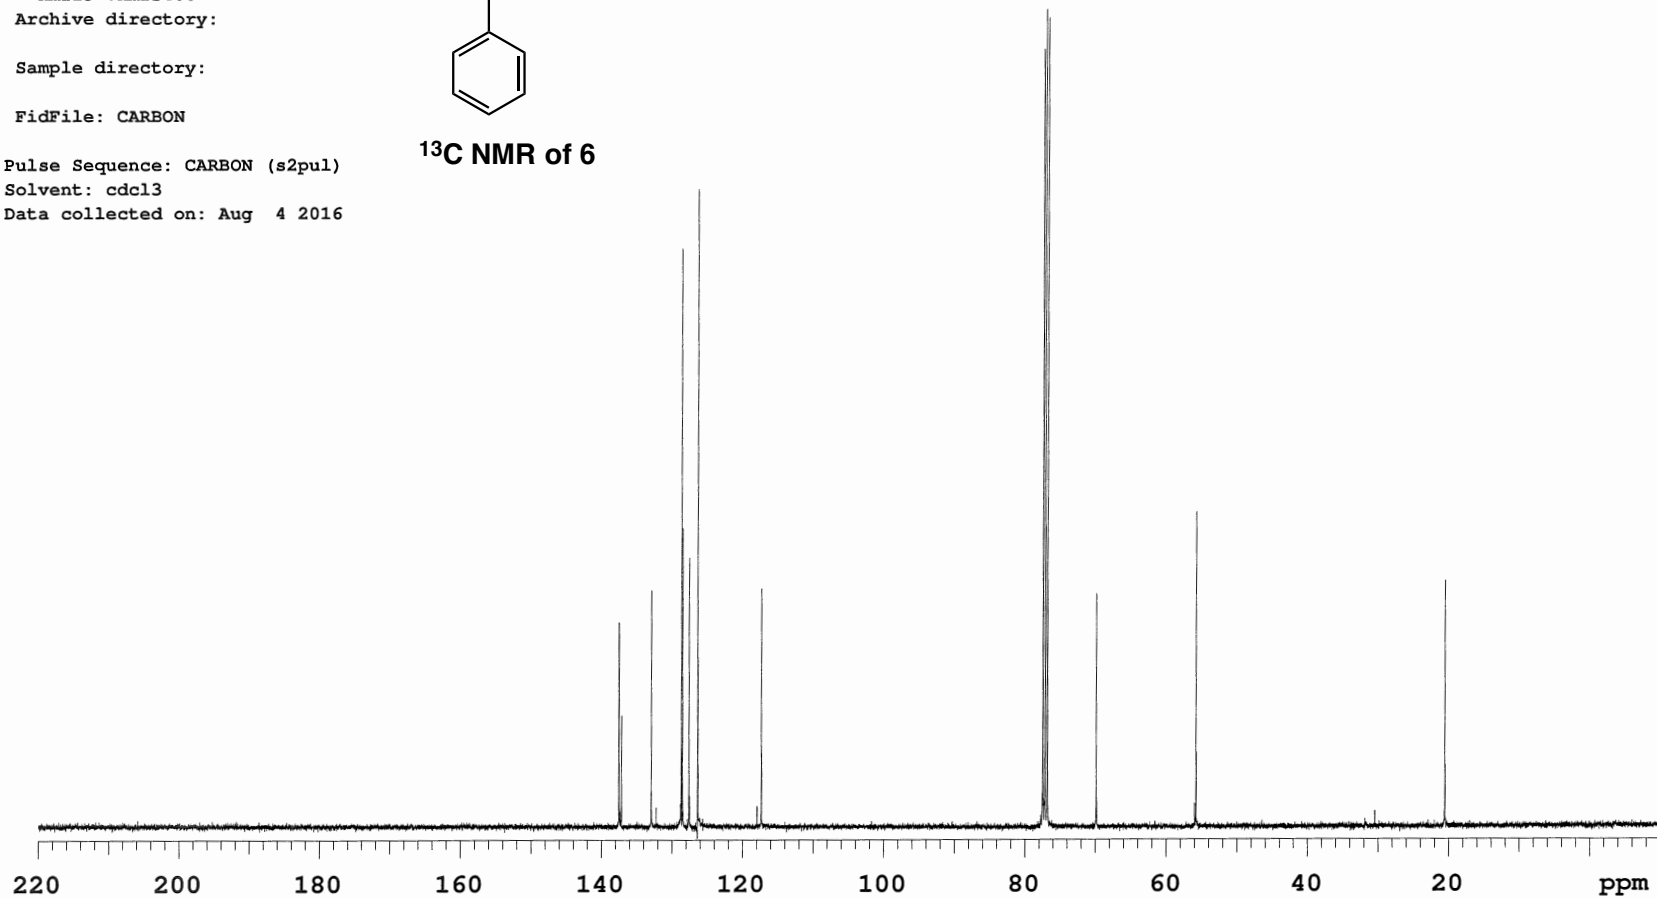

JL-IV-247-2-oxi-PD

Sample Name:

JL-IV-247-2-oxi-PD

Data Collected on:

nmr13-vnmrs400

Archive directory:

Sample directory:

FidFile: PROTON

Pulse Sequence: PROTON (s2pul)

Solvent: cdcl3

Data collected on: Apr 16 2016

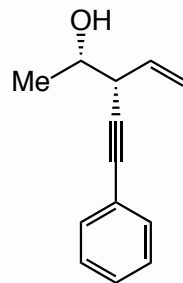

<sup>1</sup>H NMR of 7

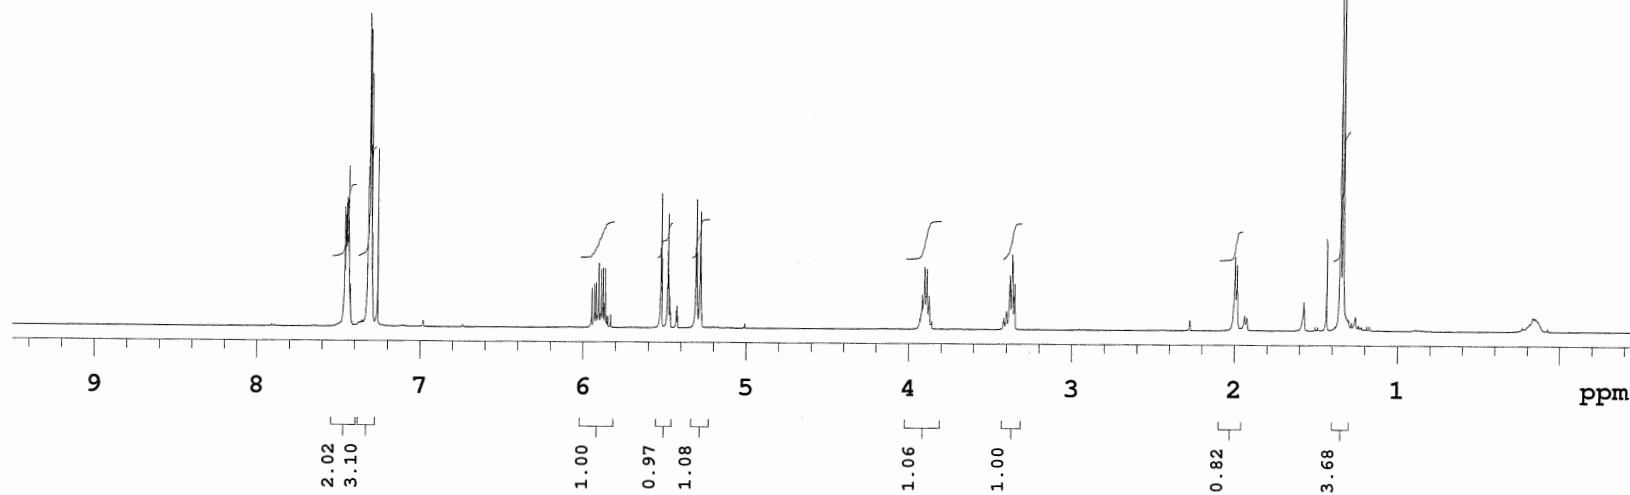

JL-IV-247-2-oxi-PD-C

Sample Name:

JL-IV-247-2-oxi-PD-C

Data Collected on:

nmr13-vnmrs400

Archive directory:

Sample directory:

FidFile: CARBON

Pulse Sequence: CARBON (s2pul)

Solvent: cdcl3

Data collected on: Apr 19 2016

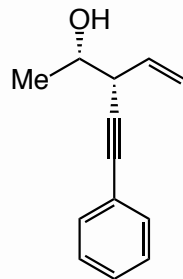

<sup>13</sup>C NMR of 7

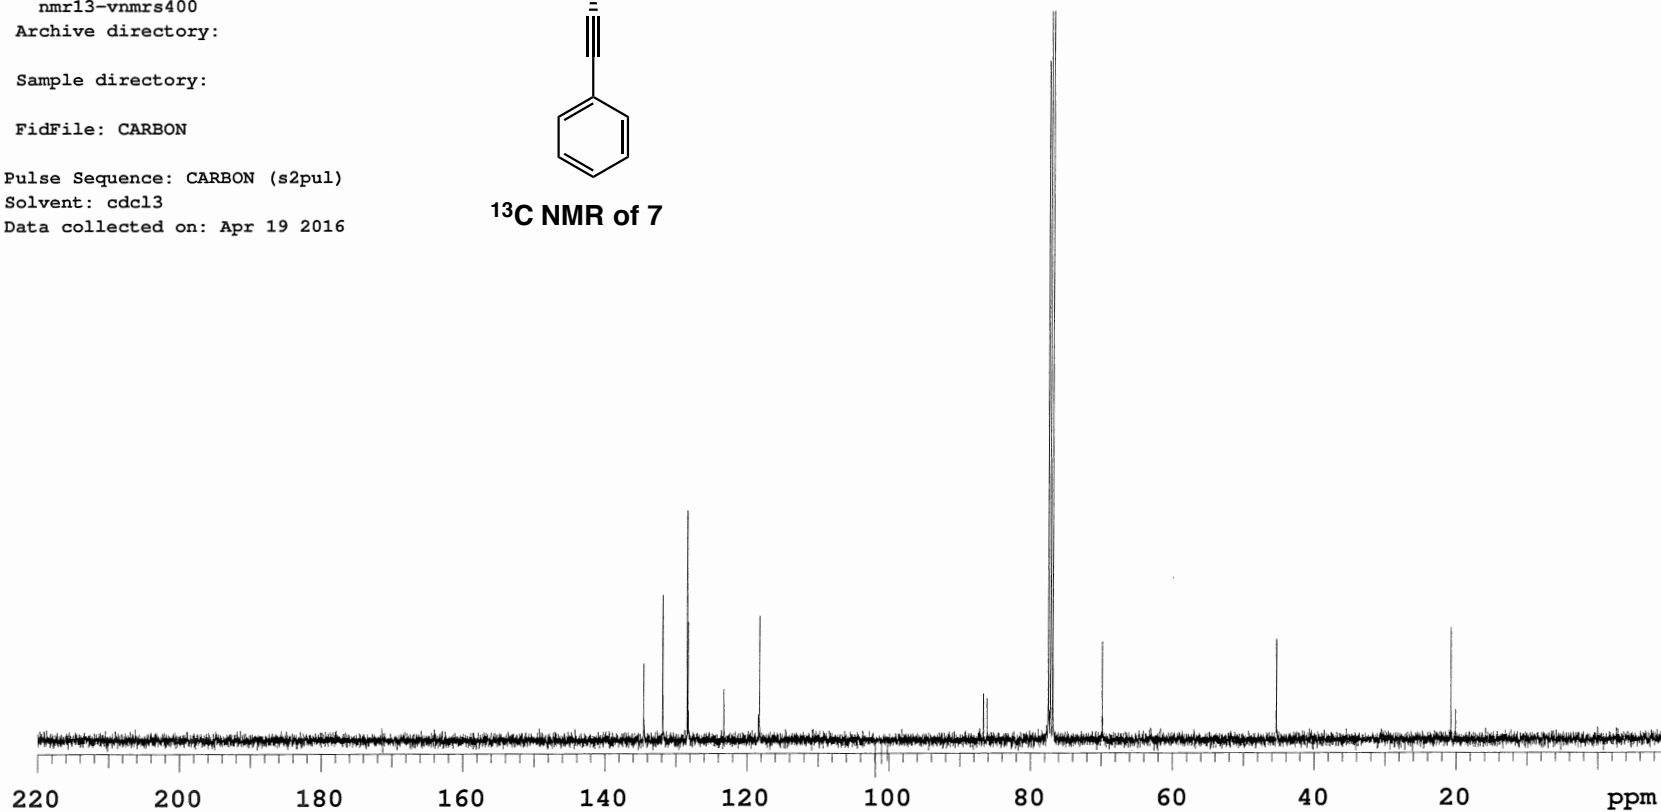



JL-IV-219-2-oxi-PD

Sample Name:  
 JL-IV-219-2-oxi-PD  
 Data Collected on:  
 nmr13-vnmrs400  
 Archive directory:

Sample directory:

FidFile: PROTON

Pulse Sequence: PROTON (s2pul)  
 Solvent: cdcl3  
 Data collected on: Mar 18 2016

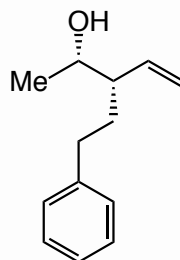

<sup>1</sup>H NMR of 8

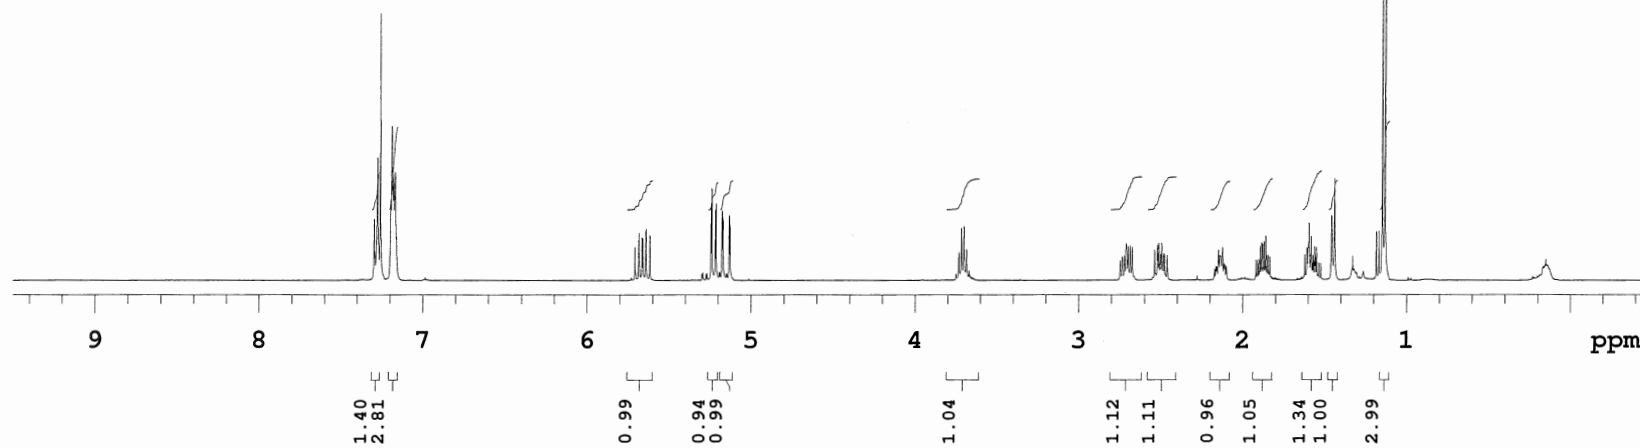

JL-IV-219-2-oxi-PD-C

Sample Name:

JL-IV-219-2-oxi-PD-C

Data Collected on:

nmr13-vnmrs400

Archive directory:

Sample directory:

FidFile: CARBON

Pulse Sequence: CARBON (s2pul)

Solvent: cdcl3

Data collected on: Mar 21 2016

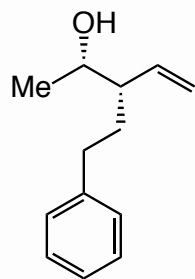

**<sup>13</sup>C NMR of 8**

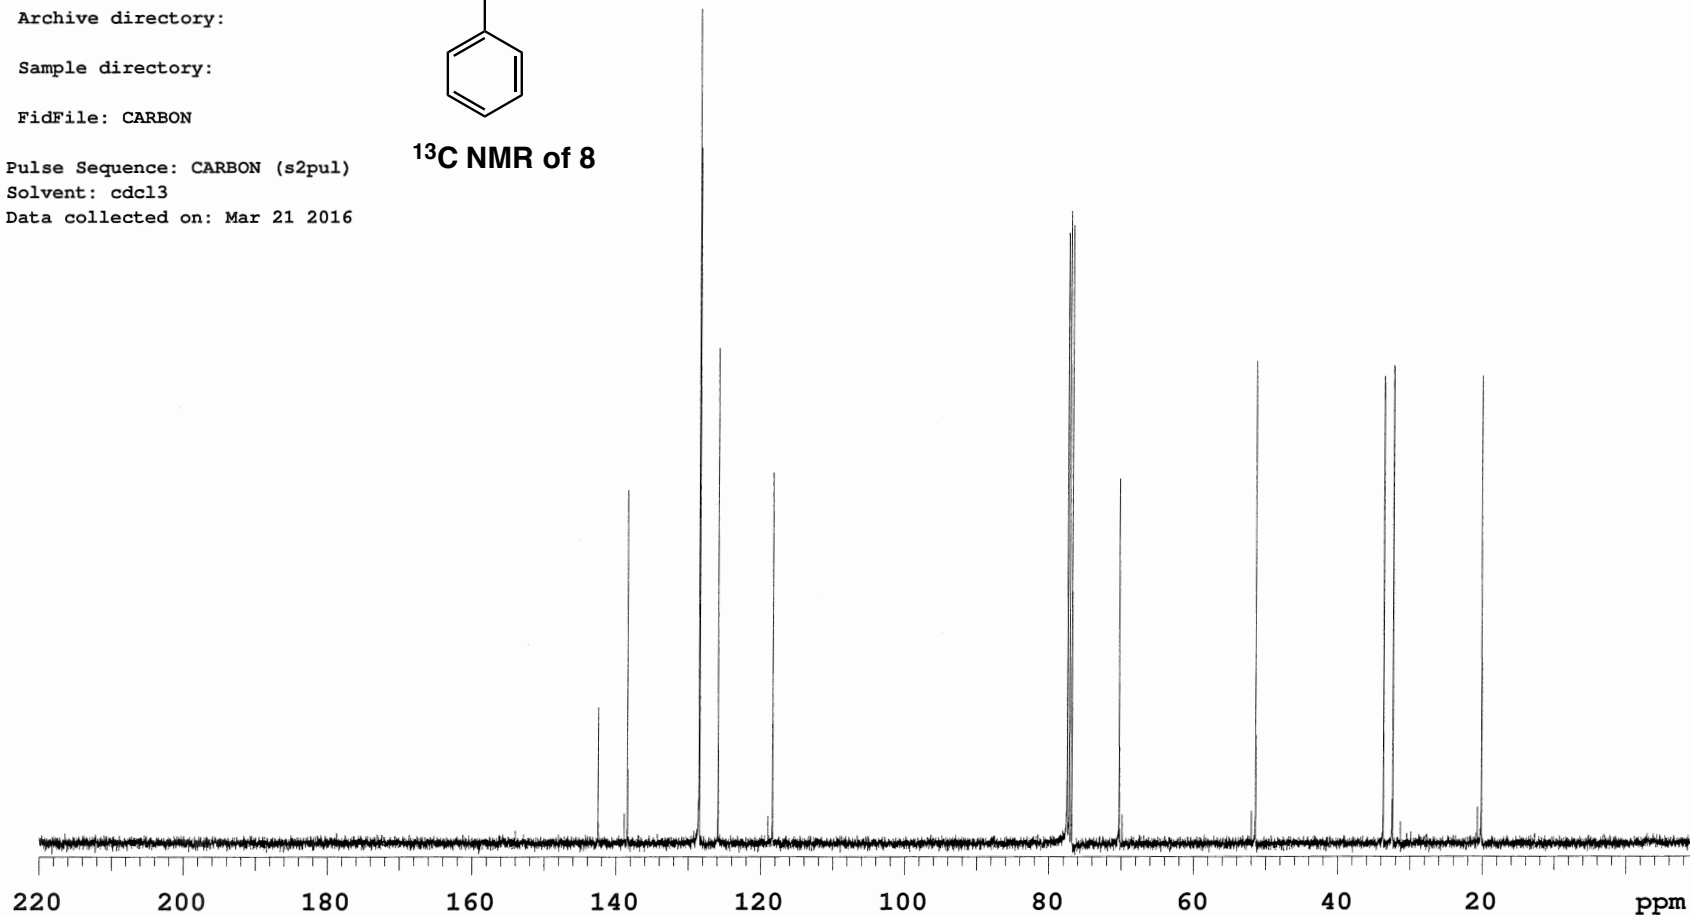

JL-IV-259-2-oxi-PD

Sample Name:

JL-IV-259-2-oxi-PD

Data Collected on:

nmr13-vnmrs400

Archive directory:

Sample directory:

FidFile: JL-IV-259-2-oxi-PD

Pulse Sequence: PROTON (s2pul)

Solvent: cdcl3

Data collected on: Apr 23 2016

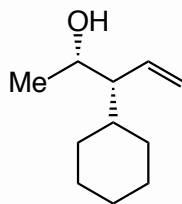

**<sup>1</sup>H NMR of 9**

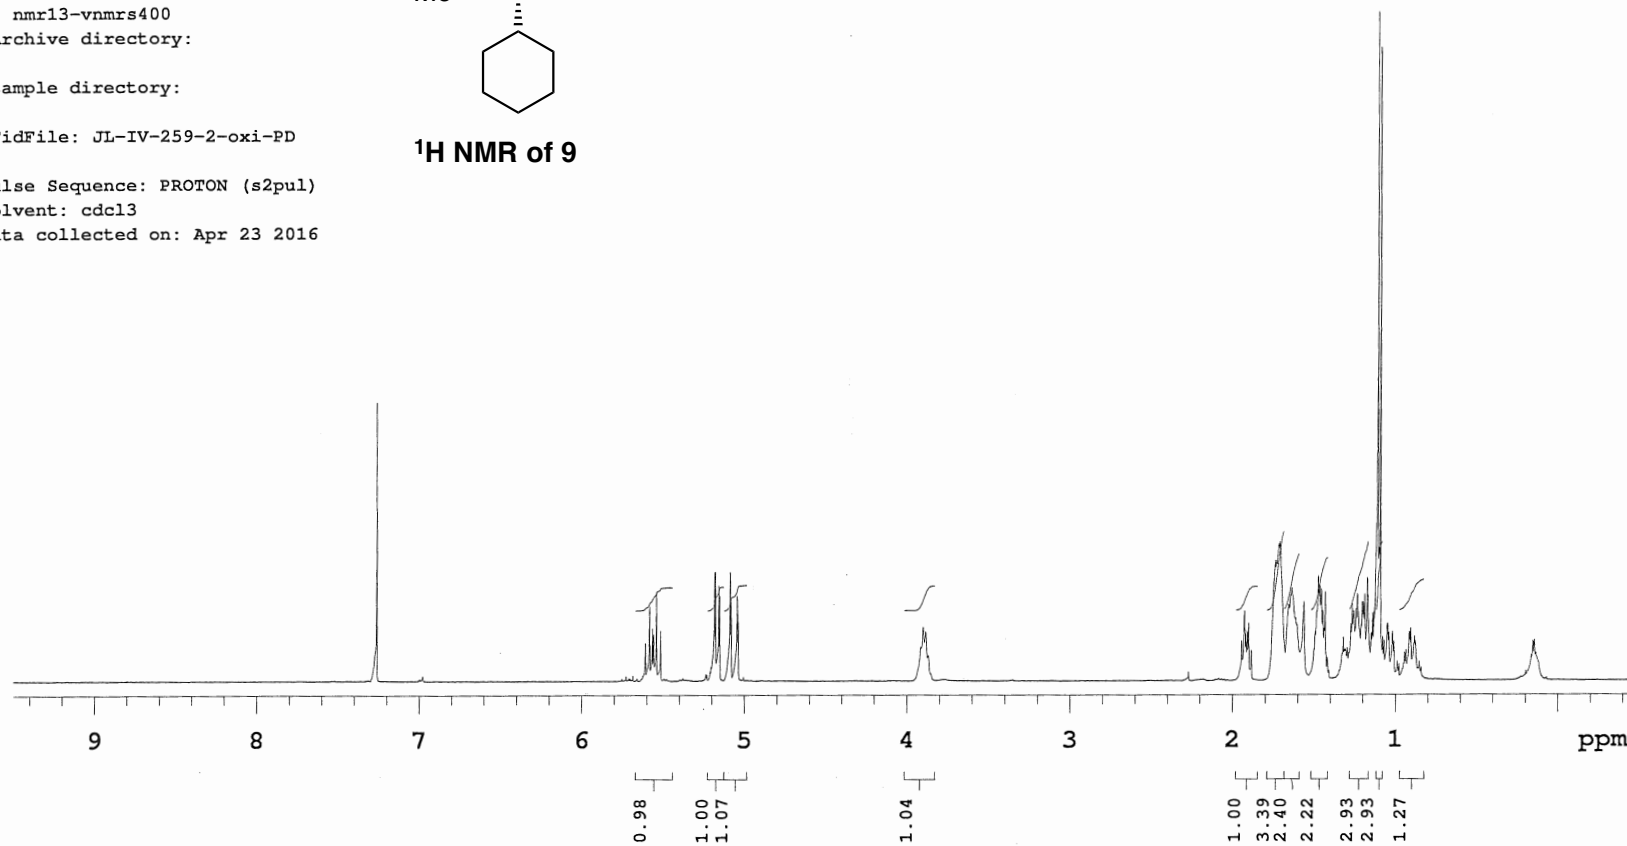

JL-V-43-1-oxi-PD-C

Sample Name:

JL-V-43-1-oxi-PD-C

Data Collected on:

nmr13-vnmrs400

Archive directory:

Sample directory:

FidFile: CARBON

Pulse Sequence: CARBON (s2pul)

Solvent: cdcl3

Data collected on: Jul 11 2016

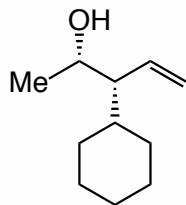

**<sup>13</sup>C NMR of 9**

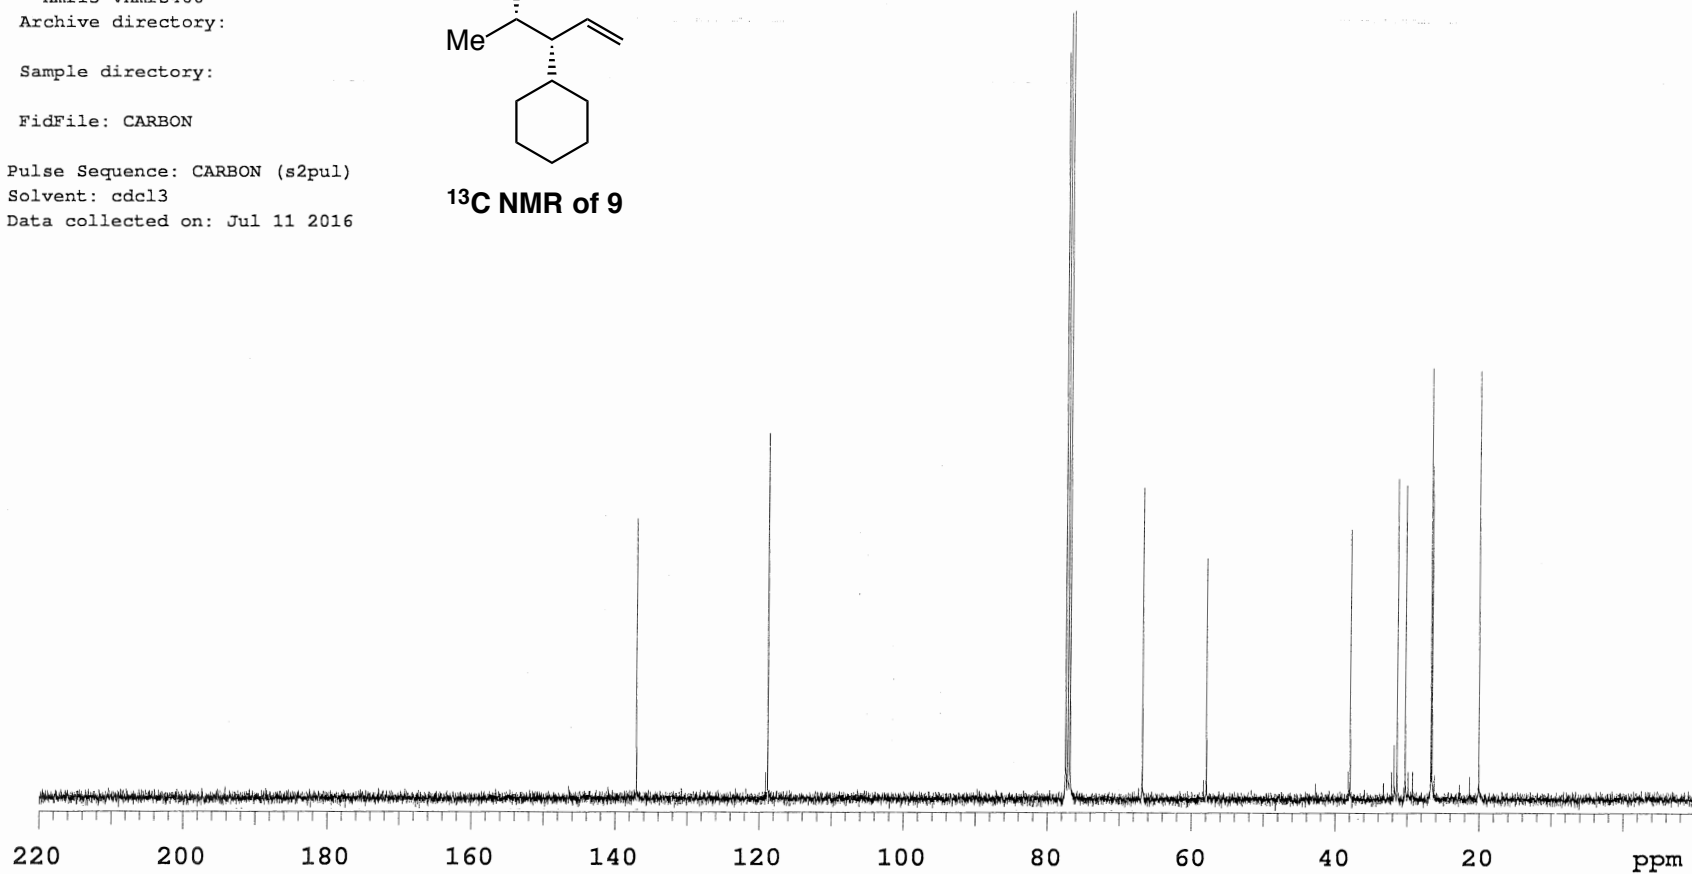

JL-V-109-2PD

Sample Name:

JL-V-109-2PD

Data Collected on:

nmr13-vnmrs400

Archive directory:

Sample directory:

FidFile: PROTON

Pulse Sequence: PROTON (s2pul)

Solvent: cdcl3

Data collected on: Sep 16 2016

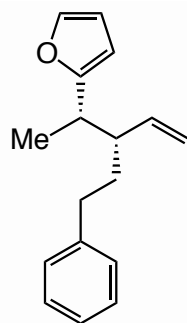 **$^1\text{H}$  NMR of 12**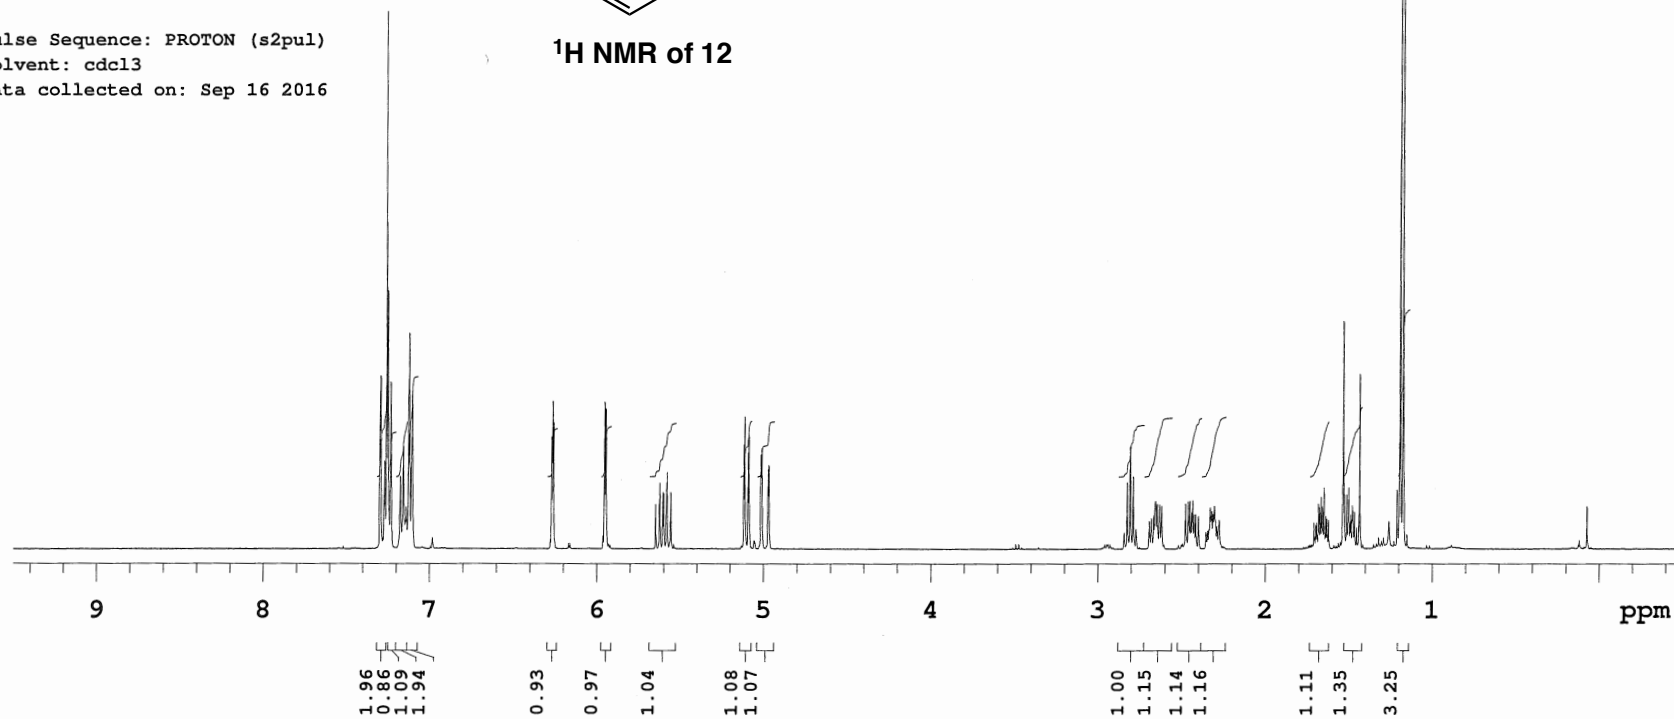

JL-V-109-2PD

Sample Name:

JL-V-109-2PD

Data Collected on:

nmr13-vnmrs400

Archive directory:

Sample directory:

FidFile: CARBON

Pulse Sequence: CARBON (s2pul)

Solvent: cdcl3

Data collected on: Sep 16 2016

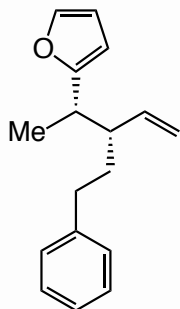

<sup>13</sup>C NMR of 12

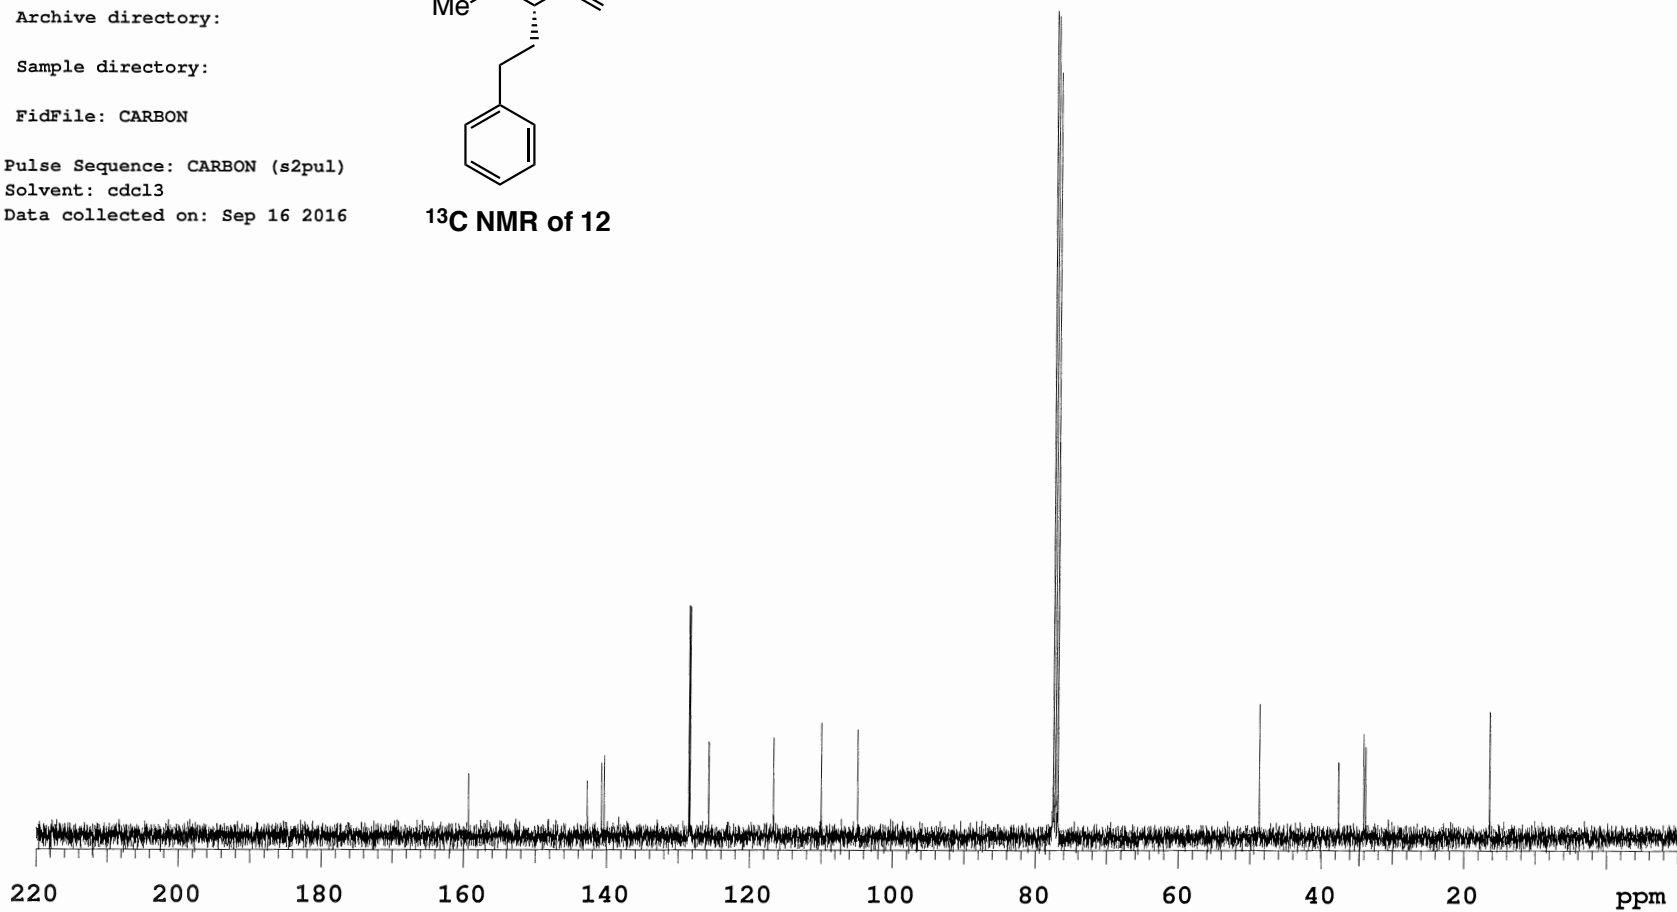

Supplement: NIHMS843138-supplement-Supporting_Information.pdf [file NIHMS843138-supplement-Supporting_Information.pdf]
